# Supplementary material for: A single cell transcriptional roadmap of human pacemaker cell differentiation
Source: eLife. 2022 Oct 11;11:e76781. doi: 10.7554/eLife.76781 (PMC9553210; doi:10.7554/eLife.76781)
Supplement: Figure 2—source data 1. [file elife-76781-fig2-data1.xlsx]

## Sheet: Sheet1
Figure 2. Electrophysiological characterization of SANCM and VCM.
Figure 2 C-E
hiPSC-SANCM
Cell	MDP	APA	Vmax	Cycle length	APD20	APD50	APD90
1	50.614	50.614	3.114	607.657	69.143	116.771	199.343
2	93.507	93.507	12.871	398.571	69.043	123.314	157.057
3	84.558	84.558	8.783	311.1	66.3	119.183	158.367
4	69.1	69.1	5.44	518.9	57.76	129.88	268.04
5	73.277	73.277	3.385	436.092	65.723	107.908	174.677
6	46.16	46.16	3.56	347.64	55.1	84.06	135.02
7	77.555	77.555	7.036	559.927	67.855	114.073	188.255
8	57.65	57.65	2.45	709.625	68.56	102.02	166.14
9	89.527	89.527	7.3	478.273	50.727	94.055	136.182
10	63.483	63.483	2.6	487.737	80.433	120.067	175.833
11	51.189	51.189	2.467	500.467	67.2	96.844	144.133
12	55.622	55.622	3.633	603.644	75.267	109.956	156.044
hiPSC-VCM
Cell	MDP	APA	Vmax	Cycle length	APD20	APD50	APD90
1	-63.058	90.267	15.333	594.933	80.15	134.467	175.05
2	-63.7	71.536	9.029	643.014	19.8	33.729	82.143
3	-65.9	98.625	19.35	1427.05	87.4	147.7	233.6
4	-71.52	105.82	42.58	1791.12	98.6	181.6	286.12
5	-69.04	98.74	39.2	1417.88	81.44	155.88	258.56
6	-70.283	97.283	12.8	1084.77	43.933	82.167	142.533
7	-74.183	117.783	43.217	1550.6	157.867	296.467	337.167
8	-76.714	117.114	32.9	1533.33	214.286	350.143	381
9	-73.129	114.3	20.686	1346.6	287.686	469.257	528.086
10	-74	112.083	20.333	1593.48	284.5	461.567	519.067
11	-73.14	109.04	11.972	992	264.68	388.68	458.8
12	-63.9	88.914	9.929	922.767	174.4	255.343	310.114
Ivabradine
hiPSC-SAN
BL	467.388	573.496	362.275	397.853	828.467	317.044
Treatment	715.024	646.395	384.654	675.3	1287.54	922.358
hiPSC-VCM
BL	534.005	945.929	1032	788.878	529.216	1197.78
Treatment	457.571	959.629	1020.13	722.64	570.558	1176.54
MDP, maximal diastolic potential; APA, action potential amplitude; Vmax, upstroke velocity; APD20, APD50, APD90, AP duration at 20, 50, 90% repolarization
