# Supplementary material for: A single cell transcriptional roadmap of human pacemaker cell differentiation
Source: eLife. 2022 Oct 11;11:e76781. doi: 10.7554/eLife.76781 (PMC9553210; doi:10.7554/eLife.76781)
Supplement: Figure 7—source data 1. [file elife-76781-fig7-data1.xlsx]

## Sheet: Sheet1
Figure 7. Active TGF signaling induced SAN-TZ cell differentiation.
Figure 7 F-H
hiPSC-SANCM
Cell	Cycle length	MDP	Vmax	APA	APD20	APD50	APD90
1	544.395	-59.7947	3.15263	83.4974	85.6342	139.932	196.142
2	472.861	-49.5107	0.946429	52.625	71.5321	113.896	210.086
3	563.206	-63.1194	1.81944	87.9083	120.008	187.717	260.208
4	674.777	-52.0538	1.36923	75.9769	91.1539	156.408	244.862
5	492.033	-65.157	2.686	71.143	84.857	127.257	184.371
6	569.473	-70.933	3.73	78.467	86.567	133.417	189.117
hiPSC-SANCMTGFB2
Cell	Cycle length	MDP	Vmax	APA	APD20	APD50	APD90
1	741.817	-65.3444	4.916	78.0778	64.95	124.389	258.1
2	805.75	-70.5313	1.7	53.3875	165.631	210.562	278.9
3	739.09	-75.71	5.90303	111.557	134.95	201.213	237.907
4	862.876	-70.6636	12.6643	89.1606	133.355	201.924	290.745
5	732.789	-72.6571	2.53	92.2607	60.1143	102.836	181.932
6	601.625	-63.6875	7.976	68.5656	97.3094	143.831	222.525
7	1082.03	-60.94	6.867	79.4733	79.68	134.94	230.187
8	772.369	-72.875		82.6813	91.7438	158.856	251.988
MDP, maximal diastolic potential; Vmax, upstroke velocity; APA, action potential amplitude; APD20, APD50, APD90, AP duration at 20, 50, 90% repolarization
