# Supplementary material for: A single cell transcriptional roadmap of human pacemaker cell differentiation
Source: eLife. 2022 Oct 11;11:e76781. doi: 10.7554/eLife.76781 (PMC9553210; doi:10.7554/eLife.76781)
Supplement: Supplementary file 1. — Related to Figure 3 and Figure 3—figure supplement 1. [file elife-76781-supp1.xlsx]

## Sheet: cluster 0
	p_val	avg_logFC	pct.1	pct.2	p_val_adj
SPCS3	2.75967e-06	0.292222	0.806	0.637	0.0490889		as shown in Figure 3
PGM3	2.73697e-06	0.374927	0.716	0.581	0.0486851
TERF1	2.7348e-06	0.270669	0.776	0.594	0.0486466
ATP11B	2.49735e-06	0.28171	0.657	0.417	0.0444229
DYNC1I1	2.47179e-06	0.284144	0.343	0.145	0.0439681
UBA2	2.41591e-06	0.286063	0.851	0.731	0.0429741
LOC100507217	2.33652e-06	0.329572	0.567	0.334	0.041562
GPR161	2.27577e-06	0.274524	0.567	0.337	0.0404814
MBOAT7	2.26891e-06	0.271451	0.657	0.439	0.0403594
KLHL5	2.22649e-06	0.288699	0.776	0.564	0.0396049
TNS3	2.1711e-06	0.280705	0.493	0.243	0.0386195
RANBP1	2.00369e-06	0.312183	0.836	0.647	0.0356416
PICALM	1.98064e-06	0.340521	0.821	0.748	0.0352316
RPL32	1.97152e-06	0.262775	1	0.995	0.0350693
WASF2	1.96732e-06	0.259469	0.94	0.802	0.0349947
NUDC	1.95508e-06	0.297312	0.881	0.765	0.0347769
HNRNPK	1.94979e-06	0.274088	0.985	0.979	0.0346829
TCEAL7	1.86946e-06	0.28057	0.463	0.216	0.0332539
PSMA6	1.83439e-06	0.411451	0.881	0.782	0.0326301
AASS	1.78528e-06	0.512078	0.776	0.614	0.0317565
SOWAHC	1.78445e-06	0.282408	0.478	0.259	0.0317418
HNRNPA2B1	1.68295e-06	0.251702	1	0.985	0.0299364
ARFGAP3	1.65071e-06	0.265689	0.612	0.415	0.0293628
XBP1	1.61848e-06	0.258465	0.761	0.57	0.0287895
P4HA1	1.48141e-06	0.28288	0.672	0.429	0.0263514
NPC2	1.42658e-06	0.407105	0.881	0.807	0.0253759
DDX21	1.39943e-06	0.360463	0.851	0.704	0.024893
PRPF40A	1.39279e-06	0.28495	0.91	0.818	0.0247749
TNFRSF21	1.36091e-06	0.735041	0.567	0.352	0.0242079
SNX18	1.29375e-06	0.285879	0.522	0.29	0.0230132
FLT1	1.26761e-06	0.42856	0.478	0.247	0.0225482
TRAM2	1.23886e-06	0.281685	0.582	0.324	0.0220368
COL9A2	1.16432e-06	0.285484	0.194	0.052	0.0207109
SRXN1	1.15314e-06	0.308084	0.418	0.2	0.0205121
CDK2AP1	1.14038e-06	0.314385	0.881	0.796	0.020285
ARID5B	1.09689e-06	0.390214	0.552	0.294	0.0195115
NONO	1.08852e-06	0.257743	0.955	0.954	0.0193626
SEC61G	1.07214e-06	0.275495	0.94	0.846	0.0190712
FAM50A	1.00185e-06	0.286269	0.716	0.548	0.0178209
LAPTM4A	9.55272e-07	0.311473	0.955	0.898	0.0169924
MYL12A	9.54826e-07	0.656386	0.881	0.896	0.0169844
CAPZB	9.47492e-07	0.276005	0.881	0.827	0.016854
FBXL5	9.28753e-07	0.316664	0.851	0.719	0.0165207
PROM1	8.82566e-07	0.258829	0.269	0.094	0.0156991
KPNB1	8.6742e-07	0.289727	0.925	0.918	0.0154297
ZFP106	8.64546e-07	0.527523	0.567	0.329	0.0153785
RAB3B	8.58765e-07	0.717895	0.448	0.229	0.0152757
SARS	8.23774e-07	0.292022	0.851	0.657	0.0146533
INF2	7.78399e-07	0.264888	0.627	0.402	0.0138462
FST	7.57116e-07	0.926582	0.493	0.271	0.0134676
CCT5	7.45564e-07	0.362138	0.866	0.804	0.0132621
FMNL2	7.33964e-07	0.276996	0.478	0.244	0.0130558
FAM177A1	6.79026e-07	0.26906	0.687	0.514	0.0120785
GYG2	6.36478e-07	0.356011	0.716	0.491	0.0113217
GOLT1B	6.25063e-07	0.307718	0.627	0.424	0.0111186
EFS	6.22471e-07	0.255193	0.642	0.376	0.0110725
ACSL3	5.78697e-07	0.441238	0.866	0.774	0.0102939
SPRY4	5.68497e-07	0.517557	0.507	0.269	0.0101124
MAGED2	5.47962e-07	0.250199	0.97	0.947	0.00974714
MORF4L2	5.44207e-07	0.323301	0.925	0.868	0.00968036
VOPP1	5.30386e-07	0.266215	0.522	0.27	0.0094345
TNFRSF10B	5.03297e-07	0.314154	0.701	0.484	0.00895264
GPC6	4.97586e-07	0.384479	0.761	0.516	0.00885106
RPL8	4.96328e-07	0.279435	1	0.985	0.00882868
FRMD6	4.91911e-07	0.252683	0.418	0.184	0.00875011
ROBO1	4.90845e-07	0.351531	0.627	0.386	0.00873116
FOXJ3	4.89482e-07	0.291614	0.851	0.613	0.0087069
APLP2	4.43896e-07	0.356647	1	0.985	0.00789603
SND1	4.25375e-07	0.313557	0.881	0.73	0.00756658
TCF4	4.11295e-07	0.474058	0.821	0.662	0.00731612
NCOA3	4.1008e-07	0.312584	0.597	0.343	0.00729451
EIF3F	3.77913e-07	0.311388	0.94	0.92	0.00672231
MARCKSL1	3.73901e-07	0.277272	0.97	0.943	0.00665096
ZNFX1-AS1	3.68204e-07	0.453108	0.612	0.376	0.0065496
PTPRF	3.61847e-07	0.343775	0.851	0.729	0.00643654
GNA13	3.55024e-07	0.274463	0.716	0.465	0.00631516
HIVEP1	3.45957e-07	0.485389	0.597	0.379	0.00615389
MARVELD1	3.36531e-07	0.289129	0.716	0.446	0.00598622
SPRED1	3.08937e-07	0.324518	0.567	0.306	0.00549537
ALAD	3.03917e-07	0.464336	0.687	0.479	0.00540607
MAP3K4	3.01807e-07	0.325659	0.597	0.335	0.00536855
EMP3	3.01541e-07	0.326506	0.657	0.434	0.0053638
TRIP6	3.00842e-07	0.323684	0.672	0.506	0.00535137
NTN4	2.80846e-07	0.420408	0.537	0.276	0.00499569
RAI14	2.55001e-07	0.364421	0.836	0.575	0.00453596
DYRK2	2.41382e-07	0.367088	0.761	0.538	0.00429371
BRI3	2.37148e-07	0.404927	0.91	0.81	0.00421839
PTMA	2.31464e-07	0.287387	1	0.978	0.00411728
SBSPON	2.30082e-07	0.439512	0.358	0.136	0.0040927
AP3S1	2.29165e-07	0.322555	0.731	0.523	0.00407639
SYTL2	2.28924e-07	0.262744	0.284	0.092	0.00407211
PCDH8	2.20483e-07	0.259926	0.119	0.019	0.00392195
PMEL	2.18391e-07	0.507243	0.328	0.118	0.00388473
TIMP1	2.09071e-07	0.387773	0.955	0.828	0.00371895
VCL	1.97059e-07	0.535588	0.955	0.932	0.00350529
APLP1	1.81346e-07	0.375254	0.627	0.328	0.00322578
LTBP4	1.78029e-07	0.352204	0.716	0.466	0.00316678
TM4SF1	1.72769e-07	0.383613	0.164	0.034	0.00307321
RELN	1.668e-07	1.01606	0.657	0.531	0.00296703
HNRPDL	1.66417e-07	0.494493	0.672	0.428	0.00296023
ARFGAP1	1.64063e-07	0.263226	0.537	0.291	0.00291835
SLC35A3	1.60213e-07	0.374458	0.597	0.349	0.00284986
HNRNPR	1.54304e-07	0.312292	0.94	0.818	0.00274475
CUL7	1.49275e-07	0.369062	0.746	0.506	0.00265531
CAPNS1	1.48498e-07	0.328784	0.985	0.952	0.00264148
PCDH18	1.43441e-07	0.285997	0.343	0.122	0.00255152
ADAMTS8	1.37571e-07	0.266796	0.104	0.014	0.0024471
CCT6A	1.3523e-07	0.291138	0.97	0.876	0.00240546
CASP3	1.29358e-07	0.365692	0.672	0.455	0.00230103
NFATC4	1.1776e-07	0.261975	0.657	0.371	0.00209472
GOLM1	1.15765e-07	0.280148	0.776	0.524	0.00205922
HDLBP	1.1354e-07	0.386504	0.97	0.943	0.00201965
GAS7	1.13509e-07	0.290976	0.388	0.16	0.00201911
HSD17B14	1.12602e-07	0.352355	0.567	0.33	0.00200297
SPRY1	1.09202e-07	0.535303	0.313	0.111	0.00194249
ITGA1	1.06613e-07	0.525103	0.537	0.262	0.00189643
SC5DL	1.02235e-07	0.673623	0.567	0.352	0.00181856
LRRC59	1.01188e-07	0.277174	0.597	0.352	0.00179992
TALDO1	9.94746e-08	0.346006	0.687	0.499	0.00176945
PVRL2	9.66597e-08	0.44017	0.522	0.281	0.00171938
GPR124	9.46306e-08	0.281227	0.373	0.148	0.00168329
CALM1	9.16252e-08	0.379053	0.94	0.85	0.00162983
TGFBR1	8.77078e-08	0.414984	0.761	0.501	0.00156015
SKI	7.7262e-08	0.285409	0.821	0.554	0.00137434
RPL39	7.57544e-08	0.276086	1	0.983	0.00134752
RCN2	7.27707e-08	0.322729	0.91	0.687	0.00129444
TRAM1	7.06001e-08	0.351863	0.806	0.667	0.00125583
TNFAIP1	7.02656e-08	0.258415	0.552	0.294	0.00124988
YIPF5	6.94935e-08	0.288849	0.821	0.621	0.00123615
CD44	6.81123e-08	0.885284	0.313	0.106	0.00121158
FBL	6.7114e-08	0.312338	0.851	0.703	0.00119382
RPS4X	6.60682e-08	0.343197	1	0.995	0.00117522
KRAS	6.57331e-08	0.499653	0.776	0.622	0.00116926
EEF1A1	6.45988e-08	0.273769	1	1	0.00114908
FDFT1	6.43333e-08	0.425036	0.881	0.767	0.00114436
MAFG	6.42568e-08	0.33851	0.731	0.482	0.001143
BIN1	6.23513e-08	0.343846	0.701	0.439	0.00110911
ACTA2	6.15982e-08	1.46131	0.821	0.595	0.00109571
CDH6	5.76212e-08	0.274777	0.194	0.044	0.00102497
SEPT10	5.60555e-08	0.305279	0.851	0.614	0.000997115
CRISPLD1	5.47324e-08	0.357828	0.657	0.397	0.00097358
UBE2I	5.46454e-08	0.302396	0.881	0.76	0.000972033
UBA1	5.38996e-08	0.274328	1	0.965	0.000958766
CDR2L	5.34762e-08	0.265468	0.493	0.251	0.000951234
SRSF3	5.05566e-08	0.345253	0.97	0.897	0.0008993
PHC2	4.9493e-08	0.348199	0.731	0.499	0.000880381
CNTRL	4.93977e-08	0.363247	0.418	0.174	0.000878686
PRR24	4.7642e-08	0.267214	0.313	0.104	0.000847456
LPHN2	4.66268e-08	0.455075	0.582	0.318	0.000829397
HN1L	4.61799e-08	0.323576	0.716	0.512	0.000821448
CDK4	4.49336e-08	0.346144	0.851	0.681	0.000799279
SLC7A6	4.21995e-08	0.403493	0.612	0.365	0.000750644
MPZL1	4.09235e-08	0.272296	0.761	0.532	0.000727947
STX2	4.09094e-08	0.272852	0.478	0.219	0.000727697
PTPRM	4.07871e-08	0.271181	0.716	0.405	0.000725521
TMEM214	4.00026e-08	0.281358	0.731	0.448	0.000711566
AHCTF1	3.96339e-08	0.38208	0.552	0.281	0.000705008
ITGA5	3.89649e-08	0.575116	0.642	0.435	0.000693108
OSBPL1A	3.21172e-08	0.303528	0.806	0.512	0.000571301
CYBA	3.15403e-08	0.252558	0.597	0.316	0.000561039
SET	3.04081e-08	0.284771	1	0.984	0.0005409
ACTG2	2.95281e-08	0.634963	0.194	0.042	0.000525245
TMED2	2.93537e-08	0.306844	0.866	0.681	0.000522143
GFPT1	2.80121e-08	0.326887	0.866	0.604	0.000498279
IGF2BP1	2.6645e-08	0.441756	0.94	0.817	0.00047396
KHDRBS1	2.50192e-08	0.351481	0.985	0.92	0.000445042
CALR	2.31506e-08	0.364337	0.97	0.858	0.000411803
RHBDF1	2.29974e-08	0.36441	0.687	0.423	0.000409077
RPS20	2.28824e-08	0.308302	1	0.997	0.000407032
HP1BP3	2.19356e-08	0.34267	0.896	0.759	0.000390191
ID3	2.18656e-08	0.541595	0.925	0.762	0.000388945
FAM198B	2.01606e-08	0.610501	0.507	0.284	0.000358617
TMEM219	1.98137e-08	0.267804	0.851	0.611	0.000352447
PXDN	1.96357e-08	0.445891	0.896	0.846	0.00034928
ARHGAP10	1.96158e-08	0.283867	0.373	0.137	0.000348926
SLC1A5	1.86163e-08	0.324013	0.612	0.329	0.000331147
TXN	1.83119e-08	0.385911	0.896	0.778	0.000325733
FGFRL1	1.7738e-08	0.279443	0.582	0.297	0.000315523
RBM3	1.72047e-08	0.311104	0.91	0.702	0.000306037
PTPLAD1	1.5799e-08	0.416044	0.597	0.336	0.000281033
MEX3A	1.47808e-08	0.429013	0.985	0.865	0.00026292
TMX1	1.45803e-08	0.291244	0.627	0.344	0.000259354
SMARCA4	1.42498e-08	0.369871	0.851	0.8	0.000253475
TRIL	1.36426e-08	0.276147	0.299	0.091	0.000242675
RPL15	1.34851e-08	0.262205	1	1	0.000239873
FASN	1.30045e-08	0.427954	0.866	0.7	0.000231324
GNB2L1	1.24084e-08	0.746558	0.672	0.435	0.000220721
RPS18	1.18996e-08	0.635897	0.91	0.74	0.00021167
KDELC2	1.13856e-08	0.323128	0.552	0.283	0.000202526
ADAMTS2	1.10928e-08	0.262898	0.254	0.067	0.000197318
PTMS	1.07564e-08	0.427754	0.955	0.946	0.000191335
SLC30A7	9.70809e-09	0.279189	0.687	0.409	0.000172688
HOOK3	9.45571e-09	0.408272	0.866	0.692	0.000168198
YWHAZ	9.33927e-09	0.263459	1	0.988	0.000166127
MLL	8.95651e-09	0.495648	0.642	0.344	0.000159318
ST6GALNAC3	8.78211e-09	0.402239	0.507	0.228	0.000156216
MTHFD2	8.50316e-09	0.250544	0.522	0.232	0.000151254
CLDN11	8.3277e-09	0.378727	0.254	0.066	0.000148133
EHD2	7.84175e-09	0.381979	0.493	0.219	0.000139489
LITAF	7.69244e-09	0.414811	0.806	0.55	0.000136833
CD63	7.61442e-09	0.276742	1	0.957	0.000135445
TUBA1B	7.54966e-09	0.559767	1	0.98	0.000134293
GPX8	7.03251e-09	0.462184	0.821	0.629	0.000125094
LMNB2	6.85044e-09	0.279923	0.478	0.2	0.000121856
RPS2	6.84302e-09	0.288236	1	1	0.000121724
ADAM19	6.81231e-09	0.428296	0.776	0.538	0.000121177
RPS7	6.69659e-09	0.273193	1	0.999	0.000119119
HES1	6.18209e-09	0.515912	0.746	0.411	0.000109967
NUAK1	6.17165e-09	0.608101	0.612	0.341	0.000109781
TMOD3	6.16892e-09	0.280172	0.522	0.24	0.000109733
PTGR1	5.82797e-09	0.291125	0.672	0.351	0.000103668
SVEP1	5.55211e-09	0.525158	0.448	0.199	9.87609e-05
LRRN3	5.17239e-09	0.454578	0.478	0.2	9.20065e-05
MSN	4.99025e-09	0.39028	0.776	0.588	8.87666e-05
APMAP	4.94558e-09	0.316273	0.761	0.488	8.79721e-05
SEC31A	4.52404e-09	0.413792	0.955	0.892	8.04736e-05
CYR61	4.46014e-09	0.885593	0.761	0.55	7.93369e-05
PRRX1	4.43963e-09	0.277765	0.134	0.019	7.89721e-05
TRAF4	4.36459e-09	0.288847	0.552	0.268	7.76374e-05
NLGN2	4.34837e-09	0.299084	0.821	0.547	7.73489e-05
SSR2	4.2833e-09	0.305864	0.985	0.866	7.61913e-05
P4HB	4.10982e-09	0.452688	0.896	0.841	7.31055e-05
SEC61A1	4.09573e-09	0.392686	0.746	0.55	7.28549e-05
ADAR	4.06492e-09	0.370478	0.881	0.723	7.23069e-05
SNAP23	3.9999e-09	0.266688	0.567	0.258	7.11502e-05
CREB3L2	3.8483e-09	0.392612	0.716	0.454	6.84535e-05
LTBP1	3.73319e-09	0.785062	0.836	0.807	6.64059e-05
SLC25A1	3.51818e-09	0.373673	0.881	0.705	6.25814e-05
VTN	3.3669e-09	0.303369	0.433	0.159	5.98904e-05
PREX1	3.34197e-09	0.356424	0.358	0.124	5.94469e-05
TCF7L1	3.34118e-09	0.338239	0.821	0.542	5.9433e-05
HSP90AB1	3.32066e-09	0.300392	1	0.997	5.90678e-05
HSPA8	3.26414e-09	0.366542	1	0.99	5.80624e-05
GLTSCR2	3.23588e-09	0.42015	0.836	0.651	5.75598e-05
RPL11	3.16953e-09	0.302457	0.985	0.996	5.63795e-05
PDE9A	3.16701e-09	0.279707	0.493	0.216	5.63347e-05
KRT18	3.1187e-09	0.88042	0.881	0.749	5.54754e-05
SLC3A2	3.06033e-09	0.413506	0.776	0.535	5.44372e-05
APOL6	2.87877e-09	0.488334	0.507	0.24	5.12076e-05
ACLY	2.66878e-09	0.500537	0.761	0.615	4.74723e-05
C5	2.65699e-09	0.294769	0.254	0.062	4.72625e-05
RPL19	2.46587e-09	0.306872	1	0.994	4.38629e-05
C1orf198	2.44568e-09	0.883902	0.881	0.754	4.35037e-05
ID4	2.43531e-09	0.592671	0.687	0.402	4.33194e-05
PRKCDBP	2.4265e-09	0.357991	0.612	0.318	4.31626e-05
RPLP2	2.38789e-09	0.327896	1	0.988	4.24758e-05
RPS14	2.32366e-09	0.370506	1	0.981	4.13332e-05
EDN1	2.30827e-09	0.527669	0.299	0.085	4.10595e-05
RPLP0	2.30655e-09	0.341607	1	0.983	4.10288e-05
IRS2	2.15615e-09	0.301972	0.507	0.225	3.83536e-05
TMPO	2.11259e-09	0.415321	0.836	0.572	3.75788e-05
NANS	1.87369e-09	0.314568	0.582	0.285	3.33292e-05
WBP5	1.77242e-09	0.776866	0.627	0.367	3.15278e-05
RALA	1.73947e-09	0.373253	0.821	0.539	3.09416e-05
ST5	1.71639e-09	0.346526	0.657	0.336	3.05311e-05
RPS3A	1.65359e-09	0.294176	1	0.999	2.9414e-05
ST8SIA2	1.52344e-09	0.29074	0.358	0.113	2.70989e-05
CD276	1.48854e-09	0.363788	0.716	0.425	2.64781e-05
WWC3	1.48598e-09	0.38736	0.776	0.541	2.64327e-05
LRRC8A	1.46735e-09	0.366198	0.731	0.422	2.61012e-05
SRM	1.40164e-09	0.395606	0.746	0.476	2.49323e-05
AMOTL2	1.25169e-09	0.699151	0.806	0.587	2.22651e-05
DPY19L3	1.23064e-09	0.29431	0.657	0.349	2.18905e-05
SHMT2	1.22946e-09	0.310624	0.687	0.373	2.18696e-05
PRKCSH	1.15482e-09	0.372963	0.851	0.676	2.0542e-05
ARHGAP29	1.13267e-09	0.345811	0.448	0.172	2.01479e-05
PDIA3	1.02118e-09	0.364186	0.836	0.571	1.81648e-05
PDLIM7	9.68532e-10	0.456658	0.91	0.797	1.72282e-05
BAX	9.6437e-10	0.344879	0.433	0.168	1.71542e-05
BCAR1	9.60476e-10	0.411952	0.776	0.554	1.70849e-05
COPB1	8.97406e-10	0.367521	0.91	0.806	1.59631e-05
FAM129B	8.59508e-10	0.375984	0.716	0.463	1.52889e-05
LOC100188947	8.25384e-10	0.383034	0.313	0.093	1.46819e-05
OAT	7.07742e-10	0.316563	0.672	0.381	1.25893e-05
RAB32	6.0134e-10	0.302221	0.463	0.178	1.06966e-05
PFN1	5.10818e-10	0.371631	1	0.99	9.08644e-06
FTH1	5.04304e-10	0.350347	1	0.993	8.97056e-06
PELI1	4.61256e-10	0.331019	0.478	0.188	8.20483e-06
GDI2	4.5272e-10	0.355432	0.94	0.846	8.05299e-06
MAGED1	4.37497e-10	0.338988	0.985	0.969	7.7822e-06
ENAH	4.27333e-10	0.458027	1	0.963	7.6014e-06
NEK6	4.24232e-10	0.308137	0.463	0.187	7.54624e-06
ARPC2	3.93599e-10	0.425964	0.985	0.97	7.00133e-06
ARCN1	3.0852e-10	0.443943	0.896	0.762	5.48795e-06
ILF3	2.87585e-10	0.377153	0.985	0.868	5.11557e-06
KRT8	2.62816e-10	0.90739	0.985	0.944	4.67496e-06
PPP1R18	2.32656e-10	0.42127	0.746	0.501	4.13849e-06
TRIM28	2.03523e-10	0.344638	1	0.961	3.62027e-06
RPS8	2.00552e-10	0.31774	1	1	3.56741e-06
RPL35	1.93806e-10	0.342604	1	0.984	3.44742e-06
FILIP1L	1.87778e-10	0.429757	0.522	0.21	3.3402e-06
GOLGA3	1.86739e-10	0.363504	0.776	0.546	3.32171e-06
RPL10	1.79585e-10	0.325483	0.985	1	3.19446e-06
RPS15A	1.62043e-10	0.309934	1	0.999	2.88243e-06
FAM84B	1.61932e-10	0.86805	0.851	0.681	2.88044e-06
MYRF	1.49904e-10	0.516371	0.925	0.714	2.66649e-06
PTP4A1	1.43182e-10	0.387038	0.896	0.688	2.54693e-06
HNRNPC	1.33942e-10	0.327828	1	0.984	2.38255e-06
TNFRSF10D	1.30206e-10	0.29225	0.358	0.107	2.3161e-06
DDAH1	1.2878e-10	0.721139	0.776	0.644	2.29074e-06
CNN3	1.24781e-10	0.367605	0.806	0.519	2.2196e-06
LPP	1.1992e-10	0.532675	0.97	0.897	2.13313e-06
ACTR2	1.14554e-10	0.399403	0.925	0.795	2.03769e-06
SEC61B	1.0692e-10	0.377958	0.866	0.741	1.90189e-06
CCNI	1.06908e-10	0.393964	0.955	0.927	1.90168e-06
IGFBP4	1.0497e-10	0.505766	0.552	0.23	1.86721e-06
RAB31	9.88458e-11	0.531752	0.896	0.66	1.75827e-06
UGDH	9.84391e-11	0.293755	0.776	0.44	1.75103e-06
CKS2	8.87779e-11	0.293927	0.552	0.221	1.57918e-06
RAP2B	7.99325e-11	0.481605	0.627	0.308	1.42184e-06
H2AFZ	7.908e-11	0.527464	0.925	0.815	1.40668e-06
HNRNPAB	6.92327e-11	0.462878	0.925	0.784	1.23151e-06
TNPO1	6.58616e-11	0.411429	0.955	0.781	1.17155e-06
NRP2	6.28739e-11	0.582923	0.761	0.441	1.1184e-06
FADS2	6.28672e-11	0.564906	0.806	0.644	1.11828e-06
VASN	5.85483e-11	0.299707	0.522	0.203	1.04146e-06
ATP1B3	5.09453e-11	0.478432	0.851	0.733	9.06216e-07
KLF6	5.01421e-11	0.557706	0.791	0.539	8.91928e-07
ZFHX4	4.85268e-11	0.339129	0.448	0.153	8.63195e-07
RPL28	4.79747e-11	0.399299	1	0.98	8.53373e-07
GDI1	4.43961e-11	0.430571	0.881	0.791	7.89718e-07
WFDC1	4.05159e-11	0.258325	0.299	0.074	7.20696e-07
ARPC3	3.07637e-11	0.385522	0.91	0.778	5.47225e-07
SSR1	2.85665e-11	0.365155	0.94	0.736	5.08142e-07
UTRN	2.82221e-11	0.721853	0.91	0.766	5.02014e-07
CMTM7	2.79172e-11	0.461547	0.567	0.244	4.96592e-07
MID1IP1	2.63073e-11	0.37973	0.507	0.198	4.67954e-07
VCP	2.51729e-11	0.468003	0.97	0.916	4.47776e-07
PDLIM4	2.34177e-11	0.304031	0.582	0.248	4.16555e-07
BNC2	2.23121e-11	0.287844	0.388	0.115	3.96888e-07
SHISA5	1.97106e-11	0.457387	0.881	0.659	3.50612e-07
TRIP10	1.96667e-11	0.585497	0.806	0.606	3.49831e-07
FARP1	1.84055e-11	0.458979	0.851	0.708	3.27396e-07
MTX1	1.63984e-11	0.258387	0.537	0.215	2.91695e-07
HSP90B1	1.61213e-11	0.533128	0.985	0.946	2.86766e-07
GPM6B	1.54375e-11	0.392375	0.448	0.156	2.74602e-07
CTHRC1	1.33998e-11	0.467589	0.403	0.122	2.38355e-07
NFKB2	1.33935e-11	0.404022	0.537	0.227	2.38243e-07
MYL12B	1.29805e-11	0.67743	0.925	0.847	2.30898e-07
COL8A1	1.26764e-11	0.736777	0.284	0.066	2.25488e-07
COL3A1	1.23824e-11	1.13706	0.881	0.62	2.20258e-07
FZD8	1.22522e-11	0.592719	0.672	0.368	2.17943e-07
PLXND1	1.0005e-11	0.30922	0.552	0.227	1.77969e-07
IQGAP2	9.98328e-12	0.325318	0.269	0.058	1.77583e-07
PTPN14	9.54601e-12	0.477219	0.836	0.55	1.69804e-07
MEST	9.19224e-12	0.50434	0.701	0.38	1.63512e-07
CD81	8.60974e-12	0.387017	0.985	0.967	1.5315e-07
SOCS2	8.52945e-12	0.381495	0.418	0.129	1.51722e-07
LAMA4	8.27029e-12	0.576851	0.537	0.21	1.47112e-07
AP2M1	8.23094e-12	0.377686	0.985	0.923	1.46412e-07
CLTA	7.65893e-12	0.388126	0.881	0.619	1.36237e-07
ALDH18A1	7.64026e-12	0.266418	0.672	0.322	1.35905e-07
GLT25D1	7.51026e-12	0.297359	0.433	0.143	1.33593e-07
AJUBA	7.4805e-12	0.347305	0.731	0.345	1.33063e-07
ARL6IP1	7.09643e-12	0.682577	0.866	0.613	1.26231e-07
SULF1	6.95016e-12	1.01089	0.522	0.195	1.23629e-07
SERPINE1	6.63877e-12	0.462605	0.313	0.075	1.1809e-07
TUBB2A	5.22963e-12	0.729796	0.612	0.309	9.30247e-08
TWIST1	5.1853e-12	0.395913	0.522	0.206	9.2236e-08
HLA-B	4.74052e-12	0.347554	0.522	0.191	8.43243e-08
IER5L	4.19991e-12	0.470756	0.687	0.338	7.4708e-08
RPS11	3.9771e-12	0.395437	1	0.993	7.07447e-08
TXNRD1	3.6686e-12	0.752024	0.851	0.702	6.52571e-08
ACTN1	3.5872e-12	0.991734	0.896	0.782	6.38092e-08
BMF	3.51307e-12	0.459457	0.791	0.444	6.24906e-08
FAM126A	3.42488e-12	0.332811	0.672	0.291	6.09218e-08
AHNAK	3.25485e-12	0.5477	0.955	0.788	5.78973e-08
PPIA	3.20938e-12	0.356475	1	0.998	5.70884e-08
MRC2	3.17369e-12	0.570088	0.836	0.608	5.64536e-08
STK17B	3.00206e-12	0.363298	0.373	0.104	5.34007e-08
RPS12	2.93633e-12	0.345063	1	0.995	5.22314e-08
CSRP1	2.89819e-12	0.751551	0.94	0.816	5.15529e-08
TUBA1C	2.58295e-12	0.709254	0.701	0.387	4.59455e-08
SORL1	2.39646e-12	0.258577	0.328	0.079	4.26283e-08
NOTCH3	2.24075e-12	0.689377	0.731	0.416	3.98584e-08
GNB4	2.06737e-12	0.412583	0.761	0.464	3.67743e-08
PLTP	1.94787e-12	0.514457	0.791	0.473	3.46487e-08
GANAB	1.93168e-12	0.413475	0.836	0.644	3.43607e-08
FZD4	1.87172e-12	0.534262	0.642	0.296	3.32942e-08
CREB3L1	1.80625e-12	0.427963	0.582	0.241	3.21296e-08
RPL3	1.74185e-12	0.339913	1	0.996	3.0984e-08
EIF4G2	1.62468e-12	0.321582	1	0.999	2.88999e-08
RPL6	1.59199e-12	0.392504	1	0.997	2.83183e-08
COL11A1	1.46327e-12	0.892892	0.478	0.174	2.60286e-08
COL6A4P2	1.24585e-12	0.485143	0.582	0.244	2.21612e-08
ARHGDIA	1.24562e-12	0.494526	0.851	0.678	2.21571e-08
RPS5	1.23212e-12	0.355665	1	0.989	2.1917e-08
C8orf31	1.17227e-12	0.266544	0.299	0.065	2.08524e-08
SH2D3C	1.15527e-12	0.416765	0.388	0.104	2.05499e-08
RPS9	1.14296e-12	0.368942	0.985	0.969	2.0331e-08
PLSCR1	1.00599e-12	0.565103	0.478	0.171	1.78945e-08
SNRPB	1.00416e-12	0.510847	0.925	0.743	1.7862e-08
TLE4	1.00337e-12	0.484725	0.642	0.299	1.78479e-08
RRBP1	9.79921e-13	0.582232	0.672	0.388	1.74308e-08
TUBB6	8.75595e-13	0.679737	0.791	0.517	1.55751e-08
MYH10	8.49467e-13	0.655332	0.985	0.907	1.51103e-08
PTPN13	8.47601e-13	0.887359	0.761	0.547	1.50771e-08
DDAH2	8.46414e-13	0.533023	0.866	0.644	1.5056e-08
KDELR3	8.10524e-13	0.415735	0.701	0.353	1.44176e-08
RHOB	7.94603e-13	0.420718	0.552	0.211	1.41344e-08
SCRN1	7.81443e-13	0.433008	0.94	0.809	1.39003e-08
SERPINH1	7.80925e-13	0.487618	0.985	0.871	1.38911e-08
MYOF	7.71377e-13	0.677698	0.821	0.534	1.37212e-08
CORO1B	7.45851e-13	0.421265	0.746	0.405	1.32672e-08
ENC1	7.37651e-13	0.494054	0.448	0.141	1.31213e-08
SEC13	6.7147e-13	0.461321	0.896	0.733	1.19441e-08
COPE	6.43368e-13	0.345026	0.985	0.825	1.14442e-08
EPHA2	5.88414e-13	0.255471	0.403	0.108	1.04667e-08
RND3	5.07492e-13	0.376697	0.463	0.143	9.02727e-09
IQGAP1	5.0068e-13	0.47132	0.791	0.417	8.90609e-09
DZIP1	4.99039e-13	0.336849	0.746	0.365	8.8769e-09
CCBE1	4.86467e-13	0.822805	0.493	0.188	8.65328e-09
KIT	4.6226e-13	0.364593	0.209	0.031	8.22268e-09
SYNPO	4.17035e-13	0.636957	0.612	0.272	7.41822e-09
TSPAN12	4.06038e-13	0.345834	0.433	0.128	7.2226e-09
SURF4	4.00864e-13	0.485794	0.896	0.687	7.13056e-09
LIMD2	3.189e-13	0.375796	0.746	0.392	5.67259e-09
ADAMTS18	2.84786e-13	0.351926	0.179	0.022	5.06577e-09
RPL7A	2.84074e-13	0.378131	1	0.998	5.05311e-09
COL1A2	2.62097e-13	1.08831	0.866	0.7	4.66218e-09
JUND	2.55126e-13	0.410413	1	0.82	4.53819e-09
CTSK	2.20741e-13	0.265568	0.299	0.061	3.92654e-09
FAM114A1	2.11662e-13	0.513177	0.761	0.398	3.76505e-09
APBB2	2.05171e-13	0.454942	0.582	0.233	3.64958e-09
OTX1	2.03264e-13	0.453133	0.134	0.011	3.61565e-09
CRABP2	2.00269e-13	0.55921	0.701	0.327	3.56238e-09
TRAF5	1.8225e-13	0.26716	0.537	0.18	3.24187e-09
RRAS	1.62559e-13	0.489353	0.776	0.458	2.8916e-09
PRTG	1.60523e-13	0.799242	0.851	0.593	2.85538e-09
COL6A2	1.46973e-13	0.574158	0.836	0.563	2.61436e-09
BST1	1.43744e-13	0.276704	0.358	0.084	2.55692e-09
DGKA	1.395e-13	0.36247	0.612	0.248	2.48142e-09
RAMP2	1.3756e-13	0.27023	0.463	0.131	2.44691e-09
BHLHE40	1.19351e-13	0.289402	0.343	0.08	2.12301e-09
FMNL3	1.18913e-13	0.309113	0.403	0.106	2.11523e-09
CYFIP1	1.15829e-13	0.473081	0.851	0.535	2.06037e-09
RCC2	1.11843e-13	0.460932	0.851	0.583	1.98946e-09
NFKBIA	1.09075e-13	0.883946	0.791	0.544	1.94023e-09
ELN	9.77904e-14	0.666366	0.164	0.017	1.7395e-09
TTYH3	9.33635e-14	0.56079	0.851	0.603	1.66075e-09
NET1	8.48777e-14	0.643602	0.672	0.347	1.50981e-09
ZYX	8.23354e-14	0.635719	0.985	0.874	1.46458e-09
ARF4	7.35834e-14	0.484711	0.97	0.904	1.3089e-09
LY6E	6.86037e-14	0.505464	0.881	0.583	1.22032e-09
SERF2	6.49334e-14	0.401387	1	0.99	1.15504e-09
IGFBP2	5.89441e-14	0.793981	0.776	0.434	1.0485e-09
PABPC1	4.2131e-14	0.395628	0.97	0.975	7.49426e-10
HLA-E	4.04676e-14	0.449103	0.582	0.222	7.19838e-10
ID1	3.65176e-14	0.998462	0.836	0.523	6.49575e-10
ARID3B	3.45497e-14	0.344836	0.612	0.243	6.14569e-10
G6PD	3.17396e-14	0.411732	0.627	0.265	5.64584e-10
GGH	3.16859e-14	0.418432	0.627	0.252	5.63629e-10
SEC24D	3.11338e-14	0.433559	0.701	0.333	5.53809e-10
PTBP3	2.81223e-14	0.550271	0.776	0.489	5.00239e-10
TSKU	2.61511e-14	0.379893	0.582	0.218	4.65175e-10
SERPINE2	2.49583e-14	0.646197	0.642	0.246	4.43957e-10
RPL13	2.48351e-14	0.402536	1	0.999	4.41767e-10
VAT1L	2.38767e-14	0.337243	0.254	0.041	4.24719e-10
SGK223	2.32339e-14	0.25875	0.373	0.085	4.13284e-10
LOC100506990	2.1527e-14	1.14331	0.925	0.768	3.82922e-10
ANXA5	2.00752e-14	0.623275	0.94	0.843	3.57097e-10
LIN28B	1.72989e-14	0.502079	0.597	0.234	3.07713e-10
RPL14	1.67301e-14	0.394891	1	0.996	2.97595e-10
ACOT7	1.64258e-14	0.262404	0.552	0.179	2.92182e-10
RPS6	1.35463e-14	0.42489	1	0.997	2.40961e-10
VASH2	1.11542e-14	0.319781	0.478	0.133	1.9841e-10
FHL1	1.06516e-14	0.92101	0.925	0.72	1.8947e-10
CLIC1	1.06334e-14	0.612541	0.881	0.746	1.89146e-10
ITPRIPL2	9.40745e-15	0.407015	0.642	0.259	1.6734e-10
LEPREL1	6.32717e-15	0.525156	0.537	0.184	1.12548e-10
RPS15	6.32177e-15	0.401573	1	0.989	1.12452e-10
OXTR	6.20319e-15	0.641674	0.299	0.058	1.10342e-10
CDR2	4.80301e-15	0.320694	0.522	0.16	8.54359e-11
PHLDA1	4.30574e-15	0.666468	0.761	0.387	7.65906e-11
C1orf168	4.19275e-15	0.56948	0.313	0.061	7.45806e-11
CRTAP	4.07856e-15	0.572875	0.97	0.838	7.25494e-11
NOTCH1	4.03092e-15	0.288094	0.507	0.153	7.1702e-11
ITGB1	3.96884e-15	0.5717	1	0.97	7.05977e-11
HMGA1	3.9195e-15	0.730396	0.94	0.785	6.972e-11
ALX1	3.42248e-15	0.427753	0.373	0.082	6.08791e-11
RPS16	3.28356e-15	0.451395	0.985	0.986	5.84079e-11
PCDH10	3.25974e-15	0.900831	0.537	0.199	5.79842e-11
CCND2	3.01536e-15	0.961589	0.97	0.878	5.36372e-11
TMED9	2.94418e-15	0.580294	0.896	0.717	5.23711e-11
SERP1	2.74127e-15	0.60871	0.866	0.653	4.87617e-11
SEZ6L2	2.60562e-15	0.293126	0.552	0.163	4.63488e-11
TIMP2	2.38061e-15	0.575997	0.806	0.496	4.23463e-11
DOK5	1.72149e-15	0.298656	0.358	0.074	3.06219e-11
ENG	1.49208e-15	0.816991	0.343	0.071	2.65411e-11
PLK2	1.44495e-15	0.470076	0.493	0.147	2.57027e-11
SHC1	1.40289e-15	0.638093	0.836	0.506	2.49546e-11
LIN28A	1.39779e-15	0.361179	0.373	0.083	2.48639e-11
FOXC1	1.23855e-15	0.642287	0.567	0.2	2.20314e-11
GNB1	1.23295e-15	0.482749	0.97	0.902	2.19317e-11
GLIPR2	1.10801e-15	0.277851	0.522	0.146	1.97092e-11
KDELR2	6.65617e-16	0.600988	0.94	0.733	1.184e-11
ARPC1B	3.61948e-16	0.467049	0.687	0.298	6.43834e-12
TGFBI	3.58048e-16	0.69417	0.358	0.072	6.36896e-12
IFITM3	3.34624e-16	0.867248	0.985	0.925	5.95229e-12
LTBP2	3.14482e-16	0.301945	0.313	0.055	5.59401e-12
RPL4	3.06411e-16	0.405486	1	0.999	5.45044e-12
RAC1	2.78347e-16	0.45213	0.985	0.971	4.95123e-12
RCN1	2.68766e-16	0.563076	0.896	0.623	4.78081e-12
VAT1	2.50035e-16	0.464747	0.881	0.548	4.44762e-12
ACTN4	2.30475e-16	0.858331	0.97	0.847	4.09969e-12
CCKBR	2.09617e-16	0.664069	0.284	0.045	3.72866e-12
CALU	1.42567e-16	0.5127	0.985	0.916	2.53598e-12
CFL1	1.40952e-16	0.379987	1	0.999	2.50726e-12
PARVA	1.39019e-16	0.575622	0.896	0.622	2.47287e-12
F2R	1.33736e-16	0.664258	0.731	0.34	2.37889e-12
LINC01467	1.2821e-16	0.634134	0.149	0.01	2.2806e-12
PLS3	1.11949e-16	0.713165	0.91	0.586	1.99134e-12
EFHD1	1.11894e-16	0.425143	0.493	0.133	1.99036e-12
CAP1	8.60495e-17	0.615593	0.955	0.787	1.53065e-12
CKAP4	7.93317e-17	0.643441	0.985	0.888	1.41115e-12
GATA3	7.85846e-17	0.543148	0.537	0.165	1.39786e-12
RHOA	7.41094e-17	0.447014	0.985	0.967	1.31826e-12
GPC4	7.14665e-17	0.443638	0.537	0.168	1.27125e-12
SLC13A4	5.66598e-17	0.406684	0.119	0.005	1.00786e-12
C11orf96	5.1605e-17	0.590639	0.552	0.161	9.17949e-13
RPS3	3.63745e-17	0.529671	1	0.989	6.4703e-13
ST6GALNAC5	2.97062e-17	0.314051	0.299	0.046	5.28413e-13
RPL18A	2.90705e-17	0.421683	1	0.999	5.17107e-13
ANXA1	2.5364e-17	1.00275	0.552	0.17	4.51175e-13
RAP1B	1.27849e-17	0.58304	0.881	0.655	2.27418e-13
NRG1	1.22298e-17	0.34309	0.313	0.051	2.17544e-13
CTGF	1.10523e-17	1.63777	0.881	0.517	1.96599e-13
TPM3	5.04655e-18	0.643604	0.91	0.634	8.97681e-14
NOX4	4.02393e-18	0.36906	0.328	0.056	7.15777e-14
HLA-A	2.90171e-18	0.718228	0.925	0.651	5.16156e-14
FAM101B	2.04513e-18	0.300605	0.403	0.08	3.63788e-14
TUBB	1.50907e-18	0.69312	1	0.986	2.68433e-14
FHL3	1.48831e-18	0.487955	0.687	0.273	2.64741e-14
COL5A2	1.29774e-18	1.78763	0.821	0.507	2.30842e-14
LEPRE1	1.28091e-18	0.315673	0.433	0.094	2.27847e-14
MCAM	9.83213e-19	0.754202	0.672	0.262	1.74894e-14
FSTL1	8.08548e-19	0.990424	0.97	0.951	1.43825e-14
IL32	7.94593e-19	0.525734	0.284	0.038	1.41342e-14
MYO10	6.76935e-19	0.605886	0.612	0.198	1.20413e-14
PDIA5	6.12144e-19	0.491564	0.627	0.206	1.08888e-14
NT5DC2	3.97675e-19	0.579032	0.97	0.695	7.07385e-15
SOX8	2.61347e-19	0.251421	0.299	0.04	4.64884e-15
MXRA8	2.46564e-19	0.574998	0.91	0.467	4.38587e-15
CD248	1.19952e-19	0.35087	0.448	0.095	2.13371e-15
MEGF6	1.06479e-19	0.367149	0.448	0.092	1.89404e-15
RCN3	9.04479e-20	0.282436	0.328	0.049	1.60889e-15
RPS19	7.17919e-20	0.607043	1	0.985	1.27703e-15
TLL1	6.63282e-20	0.253023	0.299	0.038	1.17985e-15
EPB41L2	4.79817e-20	0.530311	0.687	0.242	8.53499e-16
EVA1B	3.70173e-20	0.366474	0.672	0.218	6.58464e-16
TGFB1	3.55326e-20	0.544809	0.761	0.343	6.32053e-16
CDC42EP1	2.51537e-20	0.576861	0.776	0.312	4.47434e-16
MMP2	1.89787e-20	0.568298	0.612	0.165	3.37593e-16
LYPD1	1.83798e-20	0.412759	0.209	0.017	3.2694e-16
FAM89A	1.72911e-20	0.628631	0.537	0.146	3.07575e-16
VGLL3	1.72378e-20	0.387042	0.224	0.02	3.06627e-16
DUSP4	1.17836e-20	0.251472	0.328	0.047	2.09607e-16
AHR	9.59824e-21	0.480277	0.433	0.087	1.70734e-16
LAMB1	9.49908e-21	1.05374	0.925	0.566	1.6897e-16
DACH1	8.26078e-21	0.477467	0.582	0.16	1.46943e-16
UCHL1	6.79297e-21	0.957498	0.97	0.662	1.20833e-16
CRIM1	6.24918e-21	1.03317	0.776	0.355	1.1116e-16
TKT	5.35166e-21	0.748335	0.806	0.403	9.51953e-17
LIMA1	4.49711e-21	0.544022	0.672	0.208	7.99946e-17
PRSS23	3.42188e-21	1.11475	0.881	0.448	6.08683e-17
ATRNL1	1.89886e-21	0.683204	0.597	0.171	3.3777e-17
FBLN1	1.64145e-21	0.836737	0.746	0.306	2.91981e-17
SH3BGRL3	1.51046e-21	0.737064	0.925	0.646	2.68681e-17
PI15	1.41686e-21	1.87108	0.478	0.109	2.5203e-17
TMTC1	1.22792e-21	0.594604	0.493	0.107	2.18423e-17
COL1A1	1.16056e-21	1.37379	0.985	0.856	2.06441e-17
RPL27A	8.61512e-22	0.555135	1	0.994	1.53246e-17
TAGLN	7.63024e-22	1.52279	0.955	0.683	1.35727e-17
FLNB	5.75834e-22	0.994402	0.806	0.407	1.02429e-17
MYH9	5.0559e-22	1.05605	0.985	0.804	8.99344e-18
ITGAV	4.84767e-22	1.05614	0.985	0.859	8.62303e-18
PTBP1	3.19855e-22	0.760858	0.94	0.648	5.68959e-18
PYCR1	2.84348e-22	0.565885	0.836	0.384	5.05798e-18
CCDC81	1.62208e-22	0.489989	0.493	0.102	2.88536e-18
SDC2	1.58252e-22	1.01367	0.925	0.661	2.81499e-18
CALD1	1.582e-22	1.17962	1	0.898	2.81407e-18
EML4	1.55848e-22	0.837869	0.97	0.696	2.77222e-18
WBSCR17	1.31412e-22	0.402033	0.343	0.048	2.33755e-18
COL4A4	1.10443e-22	0.454093	0.164	0.007	1.96455e-18
CNN2	1.00002e-22	0.724698	0.985	0.906	1.77883e-18
COTL1	9.85855e-23	0.5917	0.567	0.151	1.75364e-18
GNAI2	8.4493e-23	0.767521	0.97	0.833	1.50296e-18
IER3	7.67354e-23	1.12357	0.836	0.383	1.36497e-18
NQO1	6.94661e-23	0.70989	0.567	0.144	1.23566e-18
LAYN	5.15862e-23	0.503094	0.552	0.132	9.17615e-19
FN1	1.71681e-23	1.94742	0.985	0.683	3.05387e-19
LOXL1	1.36551e-23	0.869405	0.746	0.263	2.42897e-19
LASP1	9.83082e-24	1.01057	0.866	0.487	1.74871e-19
LOX	5.71712e-24	0.719702	0.507	0.097	1.01696e-19
SPSB1	3.90606e-24	0.575617	0.612	0.154	6.94809e-20
NEDD9	3.49195e-24	0.505567	0.522	0.111	6.21149e-20
QPCT	2.22973e-24	0.300252	0.433	0.07	3.96624e-20
COL4A1	1.22477e-24	1.15841	1	0.865	2.17862e-20
H3F3B	1.10465e-24	0.831299	1	0.965	1.96495e-20
OLFML2B	7.98706e-25	0.408973	0.209	0.012	1.42074e-20
IFITM1	6.67108e-25	1.56474	0.851	0.42	1.18665e-20
NPR3	5.48223e-25	0.608906	0.269	0.023	9.75179e-21
GLT8D2	4.4078e-25	0.326373	0.388	0.054	7.84059e-21
DIAPH3	1.65764e-25	0.498582	0.627	0.156	2.94861e-21
FZD2	1.55737e-25	0.960443	0.955	0.644	2.77025e-21
LRIG3	9.31099e-26	0.538062	0.507	0.099	1.65624e-21
SPARC	7.77353e-26	1.23267	1	0.895	1.38276e-21
GSTP1	7.44284e-26	0.897392	0.985	0.911	1.32393e-21
MYLK	6.2836e-26	0.68654	0.433	0.064	1.11773e-21
TMSB10	5.97244e-26	0.91907	1	0.953	1.06238e-21
MEGF9	3.70005e-26	0.705622	0.716	0.229	6.58164e-22
FRMD4A	2.74268e-26	0.543063	0.687	0.188	4.87868e-22
SEPT11	2.61662e-26	0.934715	0.985	0.727	4.65444e-22
PTPRU	2.00406e-26	0.27648	0.433	0.063	3.56482e-22
HAAO	1.74282e-26	0.433312	0.373	0.046	3.10012e-22
BCAT1	1.18973e-26	1.12262	0.896	0.476	2.1163e-22
LRRN1	8.55232e-27	0.467349	0.403	0.054	1.52129e-22
MARCKS	4.23546e-27	1.23085	0.985	0.656	7.53403e-23
EBF2	4.19213e-27	0.274696	0.209	0.01	7.45697e-23
COL5A1	3.43348e-27	1.49806	0.91	0.524	6.10747e-23
FSCN1	3.151e-27	0.771357	1	0.904	5.605e-23
SPATS2L	2.2128e-27	1.72098	0.91	0.597	3.93612e-23
FLNA	1.33318e-27	1.06609	0.97	0.723	2.37146e-23
PTX3	1.08107e-27	0.371298	0.164	0.004	1.92301e-23
GJA1	3.30521e-28	0.798555	0.701	0.169	5.87932e-24
S100A11	1.17453e-28	1.15267	0.94	0.51	2.08926e-24
ETS1	4.44222e-29	0.611158	0.582	0.111	7.90182e-25
COL4A2	3.12223e-29	1.02849	1	0.97	5.55382e-25
NIPAL4	3.09711e-29	0.395373	0.299	0.024	5.50914e-25
ARHGDIB	8.8037e-30	0.429883	0.388	0.043	1.566e-25
ARHGAP40	4.63775e-30	0.271332	0.194	0.006	8.24962e-26
EMILIN1	2.18959e-30	0.516247	0.627	0.13	3.89485e-26
FBN1	1.63751e-30	0.996539	0.776	0.203	2.91281e-26
LOXL2	1.61828e-30	1.02393	0.851	0.317	2.8786e-26
TFPI	1.06536e-30	1.00894	0.716	0.199	1.89506e-26
FTL	9.9785e-31	1.13891	1	0.969	1.77497e-26
CDC42EP5	2.35162e-31	0.572549	0.657	0.141	4.18306e-27
TMSB4X	5.98743e-32	1.54632	0.985	0.723	1.06504e-27
VIM	5.56776e-32	1.73598	1	0.881	9.90394e-28
ACTG1	5.26402e-32	1.3821	1	0.98	9.36364e-28
NR0B1	7.61454e-33	0.251797	0.179	0.003	1.35448e-28
TUBB2B	6.01112e-33	0.700347	0.642	0.129	1.06926e-28
CDKN2B	3.5316e-33	0.76876	0.433	0.048	6.28201e-29
FAM107B	3.41742e-33	0.841642	0.776	0.211	6.07891e-29
EFEMP1	2.31339e-33	1.12861	0.448	0.055	4.11507e-29
TPM4	1.2195e-33	1.3808	1	0.841	2.16924e-29
ACTB	1.10612e-33	1.52344	1	0.981	1.96757e-29
PLAU	2.6078e-34	0.28637	0.269	0.013	4.63876e-30
NELL2	9.52642e-35	0.68075	0.299	0.018	1.69456e-30
PCOLCE	3.65129e-35	1.60032	0.896	0.35	6.49492e-31
CNTNAP2	2.88873e-35	1.5139	0.567	0.094	5.13848e-31
PHLDA2	6.6667e-36	0.328249	0.269	0.012	1.18587e-31
FGF12	6.6565e-36	0.660914	0.448	0.048	1.18406e-31
CABLES1	4.12098e-36	0.305994	0.373	0.03	7.3304e-32
EOMES	2.93831e-36	0.386041	0.224	0.006	5.22667e-32
LGALS1	4.59179e-38	0.840592	0.627	0.103	8.16788e-34
COL12A1	1.01104e-38	0.933588	0.343	0.022	1.79844e-34
MEOX1	7.90038e-39	0.621936	0.194	0.002	1.40532e-34
PDGFRB	3.00333e-39	0.486042	0.672	0.104	5.34233e-35
TAGLN2	2.48741e-41	0.840199	0.761	0.154	4.42461e-37
TMEM130	1.98529e-42	0.463989	0.463	0.041	3.53143e-38
CD70	1.68114e-42	0.417407	0.254	0.006	2.99041e-38
C8orf4	4.88281e-43	0.338526	0.284	0.009	8.68554e-39
HLX	2.28347e-44	0.329154	0.328	0.014	4.06184e-40
GRPR	1.04661e-44	0.28829	0.254	0.005	1.86171e-40
FLI1	1.20931e-45	0.307258	0.269	0.006	2.15113e-41
OTX2	9.74794e-46	1.11551	0.552	0.061	1.73396e-41
GABRA5	3.63396e-46	0.251793	0.239	0.003	6.46409e-42
KCNK12	3.3671e-46	0.33489	0.239	0.003	5.9894e-42
DNM3OS	6.91838e-47	0.431013	0.343	0.014	1.23064e-42
GABRB3	1.7633e-49	1.14522	0.597	0.067	3.13656e-45
ZIC2	3.23319e-50	0.255554	0.269	0.004	5.75119e-46
HPGD	2.63945e-51	0.597328	0.284	0.005	4.69506e-47
L1CAM	1.4212e-53	0.563856	0.388	0.016	2.52802e-49
TMEM119	7.38981e-55	0.354101	0.373	0.013	1.3145e-50
RPRM	1.79499e-55	0.358592	0.313	0.006	3.19293e-51
MME	6.34614e-57	1.06666	0.582	0.05	1.12885e-52
PRRX2	4.49136e-58	0.338136	0.403	0.015	7.98924e-54
BGN	2.85261e-66	1.61178	0.836	0.113	5.07423e-62
GREM1	3.71046e-67	0.705093	0.343	0.004	6.60017e-63
TRPC4	6.16073e-70	0.475535	0.507	0.022	1.09587e-65
LGI1	2.20052e-71	0.628622	0.373	0.005	3.91428e-67
CYP1B1	7.03605e-79	1.29266	0.567	0.024	1.25157e-74
SHROOM3	2.83783e-06	0.350646	0.522	0.298	0.0504793
PDGFC	3.16577e-06	0.33226	0.448	0.231	0.0563127
SRP72	3.25246e-06	0.315947	0.896	0.799	0.0578548
SMCR7L	3.30753e-06	0.275527	0.507	0.27	0.0588344
PGD	3.35536e-06	0.264576	0.851	0.737	0.0596852
DLGAP4	3.36735e-06	0.28214	0.821	0.647	0.0598985
ATP6AP2	3.45484e-06	0.3267	0.851	0.763	0.0614547
ASAP2	3.5527e-06	0.262818	0.567	0.323	0.0631954
EIF2S1	3.67682e-06	0.255007	0.731	0.539	0.0654032
MCM7	3.79046e-06	0.331007	0.687	0.476	0.0674247
MEX3C	3.92373e-06	0.30441	0.552	0.314	0.0697953
ZNF621	3.99596e-06	0.251678	0.791	0.553	0.0710801
SF3B4	4.02917e-06	0.288152	0.91	0.762	0.0716709
RPL29	4.05851e-06	0.27215	1	0.972	0.0721928
NKTR	4.06201e-06	0.338531	0.866	0.791	0.0722551
LDB2	4.12668e-06	0.283546	0.313	0.13	0.0734054
SLC39A1	4.12754e-06	0.261649	0.612	0.425	0.0734207
C22orf28	4.33751e-06	0.31169	0.552	0.328	0.0771557
RPS21	4.61644e-06	0.274988	1	0.953	0.0821172
HN1	4.64725e-06	0.358669	0.761	0.598	0.0826654
LINC00657	4.81352e-06	0.397282	0.642	0.408	0.0856229
RRP7A	5.13398e-06	0.260875	0.642	0.429	0.0913232
RBBP4	5.1962e-06	0.333154	0.851	0.664	0.09243
MYADM	5.33586e-06	0.400207	0.866	0.81	0.0949142
PPT1	5.37727e-06	0.260686	0.731	0.535	0.0956508
LDLRAD4	5.40001e-06	0.288735	0.269	0.101	0.0960554
PTGES3	5.55067e-06	0.259005	0.955	0.911	0.0987354
PPIB	5.57744e-06	0.280322	0.776	0.671	0.0992115
KLF8	5.61547e-06	0.301733	0.403	0.192	0.099888
RAN	5.85442e-06	0.261118	0.94	0.904	0.104138
PRDX6	6.03958e-06	0.325254	1	0.957	0.107432
LMAN1	6.4197e-06	0.286905	0.776	0.632	0.114194
TTC3	6.43676e-06	0.31666	0.955	0.922	0.114497
P2RY1	6.53384e-06	0.294995	0.313	0.127	0.116224
NOLC1	6.71341e-06	0.289007	0.881	0.737	0.119418
ACTR3	6.78356e-06	0.339448	0.866	0.743	0.120666
FNDC3B	6.82367e-06	0.369396	0.851	0.771	0.121379
ILF2	7.29474e-06	0.255404	0.866	0.741	0.129759
MAP7D3	7.33135e-06	0.281812	0.537	0.312	0.13041
SKP2	7.50019e-06	0.302597	0.672	0.454	0.133413
KHSRP	7.83061e-06	0.276192	0.91	0.812	0.139291
INHBA	8.11408e-06	0.563635	0.269	0.104	0.144333
U2AF1	8.39158e-06	0.365881	0.552	0.348	0.149269
RHOBTB3	8.49507e-06	0.728473	1	0.969	0.15111
NGFRAP1	8.72678e-06	0.551163	0.672	0.434	0.155232
MYO6	9.12412e-06	0.276295	0.821	0.626	0.1623
RBMS3	9.23879e-06	0.292823	0.806	0.635	0.16434
AMOTL1	9.25141e-06	0.264995	0.672	0.46	0.164564
PXDC1	9.26072e-06	0.268471	0.418	0.226	0.16473
SEMA4C	9.56581e-06	0.303466	0.522	0.325	0.170157
ANKIB1	9.95316e-06	0.259939	0.701	0.489	0.177047
TTL	9.95704e-06	0.263833	0.731	0.523	0.177116
FKBP10	1.04786e-05	0.375951	0.746	0.649	0.186393
SEC23B	1.11958e-05	0.270619	0.507	0.313	0.19915
SDCBP	1.12459e-05	0.279975	0.866	0.751	0.200042
PRRC1	1.15267e-05	0.309784	0.731	0.572	0.205038
C16orf58	1.212e-05	0.26021	0.791	0.644	0.215591
CMPK1	1.21292e-05	0.260168	0.716	0.559	0.215754
ATN1	1.23136e-05	0.268846	0.925	0.899	0.219035
ADAMTS5	1.23782e-05	0.406898	0.284	0.107	0.220184
PPP1CA	1.26322e-05	0.257283	0.776	0.624	0.224701
IMPDH2	1.28794e-05	0.318832	0.761	0.672	0.229099
GNL1	1.28931e-05	0.277594	0.552	0.344	0.229343
FAM89B	1.33325e-05	0.285154	0.716	0.557	0.237158
SUMO3	1.35585e-05	0.269223	0.881	0.732	0.241179
OCIAD2	1.39228e-05	0.301884	0.687	0.54	0.247659
COLEC12	1.41791e-05	0.277136	0.269	0.104	0.252217
NPM1	1.46084e-05	0.29727	0.985	0.986	0.259854
PRR11	1.49124e-05	0.277293	0.463	0.256	0.265262
TRO	1.51834e-05	0.366572	0.687	0.507	0.270083
FADS1	1.56241e-05	0.313173	0.94	0.886	0.277921
SYNCRIP	1.60281e-05	0.289591	0.896	0.806	0.285107
PDLIM3	1.64724e-05	0.252293	0.806	0.635	0.293012
ARHGEF40	1.67623e-05	0.304367	0.657	0.471	0.298168
ASPM	1.73038e-05	0.283572	0.224	0.076	0.3078
NUFIP2	1.73091e-05	0.287713	0.866	0.813	0.307894
API5	1.74471e-05	0.291534	0.851	0.666	0.310348
CD151	1.77158e-05	0.25885	0.866	0.849	0.315129
SETD5	1.79358e-05	0.282184	0.881	0.788	0.319042
TPGS2	1.80788e-05	0.263005	0.866	0.697	0.321585
C12orf23	1.83561e-05	0.272159	0.552	0.323	0.326519
RAB14	1.85492e-05	0.322259	0.896	0.773	0.329953
MCCC1	1.86689e-05	0.319207	0.537	0.321	0.332082
TUBB3	1.86804e-05	0.339127	0.373	0.185	0.332287
HSPA5	1.87396e-05	0.319104	0.94	0.961	0.333341
SOX4	1.89417e-05	0.482983	1	0.954	0.336936
LUM	1.90302e-05	0.853453	0.224	0.077	0.338509
CSPP1	1.90767e-05	0.299834	0.552	0.343	0.339336
RAB1A	1.98573e-05	0.30722	0.94	0.891	0.353222
APPL2	2.0186e-05	0.281286	0.642	0.452	0.359068
SETD7	2.08772e-05	0.432679	0.672	0.524	0.371364
MSMO1	2.1968e-05	0.44265	0.821	0.79	0.390767
SNX27	2.35832e-05	0.301315	0.672	0.528	0.419498
PKD1P1	2.3859e-05	0.411215	0.582	0.397	0.424404
MXD4	2.43787e-05	0.253796	0.672	0.516	0.433649
SH3GL1	2.45544e-05	0.264151	0.746	0.57	0.436774
UBE2S	2.47288e-05	0.336397	0.657	0.449	0.439877
DHCR24	2.51701e-05	0.305699	0.657	0.451	0.447726
ROCK2	2.54879e-05	0.338469	0.761	0.611	0.453379
CHPF	2.59169e-05	0.336515	0.776	0.631	0.461011
NPIP	2.62617e-05	0.273817	0.507	0.301	0.467143
LOC728392	2.87109e-05	0.313482	0.612	0.399	0.510709
UBXN4	2.89846e-05	0.288557	0.97	0.923	0.515578
STIP1	3.13001e-05	0.285388	0.776	0.642	0.556766
SNAI2	3.33233e-05	0.585978	0.388	0.198	0.592755
AP1S2	3.34399e-05	0.556131	0.731	0.635	0.594829
C11orf24	3.35684e-05	0.260667	0.478	0.29	0.597114
PDS5A	3.44254e-05	0.276707	0.791	0.63	0.612359
WBP2	3.52006e-05	0.290165	0.866	0.818	0.626148
HSP90AA1	3.62046e-05	0.29418	1	0.989	0.644007
SMC4	3.64235e-05	0.391535	0.657	0.451	0.647901
CCDC50	3.65787e-05	0.310668	0.851	0.783	0.650662
SLC44A2	3.90206e-05	0.2608	0.881	0.759	0.694098
BAZ1A	3.92466e-05	0.267261	0.687	0.474	0.698119
TACC1	4.08432e-05	0.294855	0.672	0.444	0.726519
GALNT1	4.1273e-05	0.313176	0.761	0.671	0.734165
GULP1	4.28622e-05	0.321935	0.642	0.507	0.762433
PIM1	4.36527e-05	0.262507	0.358	0.171	0.776495
HSPB11	4.83854e-05	0.266623	0.463	0.278	0.860679
TNPO3	5.14168e-05	0.258323	0.627	0.439	0.914602
WLS	5.18745e-05	0.329305	0.97	0.922	0.922743
KCNQ1OT1	5.1926e-05	0.35001	0.985	0.983	0.923659
SSRP1	5.26683e-05	0.275973	0.791	0.648	0.936863
COPA	5.31495e-05	0.280323	0.925	0.91	0.945423
LGR4	5.56673e-05	0.331016	0.851	0.704	0.99021
C20orf112	5.94788e-05	0.266301	0.403	0.219	1
PRRC2C	6.34356e-05	0.257287	0.97	0.928	1
RPS27L	6.40715e-05	0.256717	0.851	0.706	1
PDIA4	6.9488e-05	0.277676	0.612	0.449	1
FIBIN	7.15281e-05	0.659898	0.328	0.158	1
CLTC	7.25683e-05	0.281618	0.985	0.94	1
ARF6	7.30878e-05	0.298717	0.627	0.474	1
DPYSL2	7.33848e-05	0.255109	0.716	0.527	1
ZFP36L2	7.37575e-05	0.437841	0.761	0.592	1
PPFIA1	7.67562e-05	0.283547	0.597	0.428	1
GCLM	8.0264e-05	0.25117	0.418	0.224	1
PAFAH1B2	8.53022e-05	0.258314	0.925	0.832	1
PGRMC1	8.53339e-05	0.296514	0.925	0.822	1
PTGFR	9.34116e-05	0.314423	0.164	0.052	1
C1GALT1	9.42335e-05	0.426169	0.657	0.528	1
SMC5	9.56755e-05	0.319478	0.716	0.561	1
PHF14	0.000101093	0.250662	0.701	0.528	1
UBAP2L	0.000106473	0.274991	0.836	0.729	1
SQLE	0.000115242	0.281711	0.701	0.558	1
ALCAM	0.000115367	0.425109	0.522	0.335	1
NOTCH2	0.0001271	0.257468	0.701	0.517	1
HMGCR	0.000129427	0.269894	0.672	0.502	1
RIC8A	0.000131644	0.300125	0.701	0.567	1
TMEM97	0.00013306	0.324869	0.612	0.444	1
SEC23A	0.000136355	0.261774	0.821	0.735	1
CDK6	0.0001367	0.517748	0.836	0.79	1
NEO1	0.000142629	0.279569	0.597	0.412	1
PFN2	0.000148871	0.295335	0.97	0.937	1
TARS	0.000152976	0.3026	0.806	0.68	1
WDR1	0.00015683	0.353912	0.896	0.836	1
ESRG	0.000164661	0.312957	0.328	0.177	1
MSX2	0.000167327	0.315891	0.448	0.268	1
KLHDC5	0.000168016	0.262962	0.493	0.289	1
FAT4	0.000180868	0.254326	0.418	0.231	1
SESTD1	0.000189431	0.270771	0.776	0.621	1
FAM115A	0.000200224	0.342146	0.582	0.379	1
CSNK1E	0.000202072	0.284983	0.567	0.362	1
GNPDA1	0.000203414	0.258188	0.701	0.547	1
CDK1	0.000210383	0.317508	0.224	0.091	1
PGM5P2	0.000213042	0.330099	0.597	0.406	1
NT5C2	0.000232192	0.293061	0.881	0.792	1
CDKN1A	0.000243373	0.300372	0.537	0.353	1
SEPT8	0.000246562	0.277723	0.657	0.507	1
PAICS	0.000251843	0.260979	0.791	0.684	1
ARPC5	0.000288991	0.268137	0.866	0.784	1
ATXN2L	0.000289861	0.257289	0.776	0.721	1
TGFB2	0.000305823	0.65781	0.687	0.599	1
MYO1C	0.000318392	0.299049	0.776	0.674	1
PJA2	0.000327758	0.269734	0.94	0.897	1
HEG1	0.000335665	0.383963	0.806	0.656	1
C17orf76-AS1	0.000348821	0.27125	0.657	0.419	1
BCLAF1	0.000386423	0.251778	0.896	0.799	1
FOS	0.000391794	0.395034	0.463	0.265	1
NHP2L1	0.000405163	0.301706	0.552	0.388	1
MBD4	0.000409065	0.341122	0.642	0.505	1
HDGF	0.000412756	0.324849	0.985	0.894	1
KAZN	0.000414668	0.258172	0.388	0.223	1
SCAF11	0.000427257	0.310046	0.94	0.887	1
CCNB1	0.000448079	0.309961	0.239	0.105	1
SRPX	0.00045836	0.337171	0.567	0.409	1
FDPS	0.000491931	0.282047	0.746	0.615	1
GMPR	0.00049895	0.256418	0.507	0.352	1
PGM2L1	0.000508101	0.295539	0.612	0.441	1
SOX11	0.000536632	0.443553	0.701	0.636	1
DACT1	0.00055471	0.335018	0.373	0.214	1
SFPQ	0.000583128	0.250589	0.925	0.881	1
DLG5	0.000606631	0.281227	0.597	0.469	1
HEY1	0.000628912	0.271936	0.313	0.169	1
PSMC3	0.000629072	0.271541	0.716	0.613	1
CENPF	0.000685256	0.449991	0.254	0.122	1
TLN1	0.000760467	0.291276	0.851	0.861	1
LDLR	0.000766087	0.275829	0.672	0.536	1
FUS	0.000770946	0.256816	0.881	0.852	1
RAB12	0.000824394	0.312261	0.716	0.577	1
DLK1	0.000826656	0.280717	0.224	0.097	1
CSTB	0.000838504	0.259428	0.821	0.784	1
GPX1	0.00084171	0.267572	0.881	0.845	1
PENK	0.000856138	0.274907	0.104	0.029	1
COMT	0.000870026	0.279554	0.627	0.502	1
IDI1	0.000926106	0.393571	0.776	0.748	1
TNC	0.000942098	0.51146	0.328	0.179	1
TRA2B	0.000981819	0.297506	0.866	0.775	1
CD24	0.000987273	0.614893	0.373	0.233	1
CDK2AP2	0.001035	0.261856	0.627	0.522	1
SASH1	0.00105658	0.310103	0.463	0.319	1
ROR1	0.00109465	0.446048	0.672	0.584	1
UBE2J1	0.00109556	0.279469	0.642	0.538	1
IGF1R	0.00113203	0.275545	0.776	0.716	1
IGFBP7	0.00114536	1.41107	0.642	0.545	1
CARM1	0.001157	0.25445	0.627	0.516	1
CTDSPL	0.0012763	0.272402	0.716	0.57	1
RPL17	0.00128063	0.26236	0.985	0.986	1
FLRT3	0.00128622	0.405185	0.299	0.17	1
MGST1	0.00138305	0.410655	0.776	0.68	1
RAB23	0.00138597	0.255995	0.448	0.298	1
SEMA3A	0.00140054	0.400844	0.687	0.669	1
SKIL	0.00142319	0.2524	0.687	0.668	1
FERMT2	0.00148641	0.327465	0.836	0.753	1
MAB21L3	0.00156057	0.283874	0.925	0.787	1
ATP6V1A	0.00156212	0.281015	0.731	0.655	1
RPS10	0.0016211	0.27818	0.836	0.737	1
UBC	0.00181262	0.270364	0.955	0.966	1
SERPINF1	0.00183012	0.441892	0.776	0.666	1
GLUL	0.00190957	0.254888	0.851	0.733	1
SACM1L	0.00199176	0.363925	0.701	0.581	1
HMGCS1	0.00203948	0.371269	0.761	0.71	1
MFAP4	0.00217058	0.658914	0.507	0.384	1
PAPPA	0.00229577	0.398773	0.239	0.121	1
SRSF2	0.00244597	0.278335	0.91	0.919	1
TNFSF14	0.00249902	0.351104	0.209	0.098	1
MAP3K2	0.00254445	0.2509	0.672	0.568	1
SQSTM1	0.00262185	0.33668	0.776	0.754	1
DOCK4	0.00269553	0.257703	0.448	0.308	1
ST6GAL2	0.00289357	0.287915	0.522	0.405	1
CYP51A1	0.00337087	0.271741	0.761	0.688	1
MAP2K1	0.00338317	0.262144	0.657	0.578	1
PSAT1	0.00340979	0.271705	0.388	0.253	1
PAPSS1	0.00354559	0.257421	0.582	0.476	1
HIPK2	0.00360578	0.377235	0.896	0.86	1
TMEM98	0.00483851	0.310945	0.836	0.74	1
PPP2R2B	0.00634733	0.306653	0.433	0.3	1
DCN	0.00658611	0.268537	0.209	0.104	1
NLGN4X	0.00695407	0.298233	0.254	0.144	1
TFPI2	0.00695646	0.255262	0.179	0.083	1
MCM5	0.00706833	0.271583	0.328	0.212	1
TOP2A	0.00756422	0.497513	0.149	0.067	1
TUBB4B	0.0083095	0.298078	0.672	0.624	1
UGCG	0.00895355	0.34102	0.403	0.275	1
DKK1	0.00897041	0.562444	0.478	0.36	1
IVNS1ABP	0.00976342	0.30306	0.761	0.726	1
FAM155A	0.0104368	0.293654	0.254	0.153	1
UBE2C	0.0114608	0.250307	0.209	0.113	1
ANXA2	0.0117089	0.338648	0.94	0.948	1
MCC	0.012328	0.27582	0.582	0.518	1
TPM2	0.0145652	0.283901	0.896	0.921	1
CDKN1C	0.0151507	0.342755	0.806	0.731	1
MKI67	0.0160759	0.389843	0.149	0.073	1
IGDCC3	0.016462	0.25129	0.537	0.481	1
AUTS2	0.0192921	0.258147	0.701	0.645	1
POSTN	0.0200727	0.500664	0.299	0.196	1
AKAP12	0.0206786	0.278754	0.701	0.663	1
TUBA1A	0.0218373	0.320146	0.866	0.88	1
GLCCI1	0.0362516	0.269436	0.597	0.515	1
NDFIP2	0.0377465	0.353534	0.672	0.582	1
PTRF	0.0415738	0.284708	0.597	0.533	1
PLAT	0.0430637	0.34199	0.164	0.094	1
COL27A1	0.0487654	0.270553	0.343	0.25	1
MGP	0.0502494	0.452702	0.104	0.051	1
XIST	0.0540314	0.254666	0.731	0.69	1
CFLAR	0.0542082	0.252817	0.896	0.881	1
B3GNT7	0.0565883	0.312157	0.493	0.446	1
TIPARP	0.0628951	0.378027	0.687	0.663	1
TGM2	0.0643774	0.639899	0.522	0.455	1
CSRP2	0.0719149	0.386115	0.806	0.768	1
NR3C1	0.0745594	0.2674	0.522	0.444	1
CADM1	0.0799825	0.285633	0.716	0.7	1
IGFBP3	0.0820005	0.346062	0.254	0.164	1
MAB21L2	0.0862979	0.538616	0.299	0.248	1
DLC1	0.0980056	0.322744	0.537	0.491	1
FAT1	0.101075	0.272552	0.821	0.775	1
CYFIP2	0.101158	0.275959	0.552	0.521	1
FAT3	0.102959	0.257779	0.448	0.385	1
P3H2	0.10583	0.393445	0.254	0.205	1
SLITRK4	0.124944	0.262155	0.358	0.29	1
HMGA2	0.15494	0.259987	0.701	0.722	1
CBLN2	0.165189	0.459062	0.119	0.077	1
PAG1	0.176248	0.574938	0.463	0.485	1
LOC100420587	0.184311	0.276682	0.164	0.118	1
NR2F2	0.220497	0.262502	0.731	0.687	1
SCD	0.333988	0.270472	0.925	0.898	1
HMGB2	0.466515	0.294	0.284	0.357	1
HIST1H4C	0.477158	0.277227	0.313	0.29	1
SC5D	0.546427	0.399757	0.284	0.398	1
PKM	0.585328	0.438821	0.985	0.991	1
FREM2	0.754525	0.449814	0.493	0.538	1
ERBB4	0.963083	0.797698	0.522	0.732	1
SEMA5A	0.972237	0.368867	0.522	0.605	1

## Sheet: cluster 1
	p_val	avg_logFC	pct.1	pct.2	p_val_adj
PPP2R2B	3.9264e-90	1.18844	0.846	0.196	6.98428e-86		as shown in Figure 3
HAPLN1	1.80126e-86	1.7765	0.809	0.17	3.20408e-82
GPC3	4.75744e-63	1.20004	0.936	0.488	8.46254e-59
CKB	1.44391e-49	0.880812	0.979	0.778	2.56842e-45
BST2	7.54442e-48	0.547345	0.638	0.175	1.342e-43
SERPINF1	2.31959e-46	0.946863	0.931	0.619	4.12609e-42
LMO2	9.77458e-45	0.748801	0.489	0.093	1.7387e-40
APOE	3.38424e-44	0.779481	0.973	0.77	6.01988e-40
FIBIN	4.05393e-42	0.69487	0.495	0.101	7.21113e-38
PTGFR	1.80413e-41	0.325197	0.271	0.015	3.20919e-37
GDF6	1.36505e-40	0.584389	0.564	0.142	2.42815e-36
CHRDL2	1.47404e-40	0.367336	0.25	0.011	2.62203e-36
LAMA1	1.92784e-39	0.696349	0.84	0.446	3.42925e-35
MAP1B	2.01906e-38	0.82602	0.995	0.971	3.5915e-34
ATP5B	3.11053e-38	0.443819	1	0.997	5.53301e-34
APCDD1L	1.85262e-37	0.494275	0.495	0.112	3.29544e-33
A2M	4.44167e-37	0.780914	0.92	0.588	7.90084e-33
PYGM	5.28043e-37	0.570274	0.899	0.54	9.39283e-33
SLC4A8	6.09661e-35	0.327898	0.42	0.084	1.08447e-30
AQP4	1.05063e-34	0.439439	0.277	0.027	1.86885e-30
PCDH7	2.02969e-34	0.639999	0.984	0.883	3.61041e-30
PITX2	7.67166e-34	0.55759	0.665	0.249	1.36463e-29
PTPRD	4.99723e-33	0.497974	0.989	0.911	8.88907e-29
UACA	1.72314e-32	0.829578	0.931	0.702	3.06512e-28
PRSS23	4.86786e-32	0.661804	0.798	0.407	8.65895e-28
FN1	1.84902e-31	0.284665	0.941	0.651	3.28904e-27
TMEM133	8.42884e-31	0.493194	0.867	0.549	1.49932e-26
ATP1A3	1.36732e-30	0.377101	0.41	0.092	2.43219e-26
FAM222A	3.8921e-30	0.262501	0.484	0.132	6.92327e-26
KCNN2	8.02235e-30	0.45714	0.793	0.448	1.42702e-25
CEP170	9.50662e-30	0.532095	0.926	0.772	1.69104e-25
SOCS3	2.45599e-28	0.399323	0.718	0.33	4.36872e-24
COL2A1	4.82248e-28	0.680224	0.995	0.921	8.57822e-24
PRDX2	1.52678e-27	0.391102	0.995	0.968	2.71584e-23
PKIA	1.70629e-27	0.463607	0.92	0.721	3.03515e-23
PPP3CA	5.81594e-27	0.483476	0.91	0.606	1.03454e-22
ADAM28	5.97583e-27	0.300182	0.574	0.207	1.06298e-22
ATP5G3	5.03511e-26	0.374323	0.995	0.992	8.95644e-22
SLC15A2	9.11011e-26	0.419486	0.388	0.102	1.62051e-21
LINC00173	2.22725e-25	0.34593	0.676	0.302	3.96183e-21
LOC729732	2.66621e-25	0.472941	0.617	0.279	4.74266e-21
GYG2	7.96123e-25	0.431828	0.787	0.446	1.41614e-20
ARHGAP42	1.69693e-24	0.490606	0.819	0.523	3.0185e-20
POU4F1	9.24993e-24	0.480109	0.415	0.126	1.64538e-19
OGDHL	2.36107e-23	0.30417	0.585	0.247	4.19987e-19
H2AFY	2.40527e-22	0.455235	0.984	0.927	4.27849e-18
ATP5A1	2.72244e-22	0.316254	1	0.994	4.84268e-18
ANKRD9	6.24266e-22	0.408841	0.872	0.613	1.11044e-17
LIFR	8.43946e-22	0.518947	0.787	0.547	1.50121e-17
VTN	1.3663e-20	0.312001	0.404	0.128	2.43038e-16
SERINC5	2.36554e-20	0.612563	0.862	0.654	4.20783e-16
LMO4	2.54088e-20	0.508406	0.995	0.877	4.51971e-16
GRIN2A	3.52945e-20	0.360224	0.606	0.277	6.27819e-16
EVL	4.71696e-20	0.327383	0.824	0.607	8.39053e-16
REEP6	6.8303e-20	0.274204	0.463	0.174	1.21497e-15
VLDLR	1.56209e-19	0.363324	0.771	0.504	2.77865e-15
BAMBI	2.62682e-19	0.511324	0.979	0.906	4.67259e-15
LOC401321	3.09155e-19	0.530161	0.601	0.314	5.49925e-15
SLC22A17	3.5605e-19	0.4276	0.878	0.632	6.33341e-15
MT-RNR1	4.5086e-19	0.369538	1	1	8.01989e-15
ACOT13	4.54367e-19	0.338389	0.947	0.802	8.08228e-15
XPO4	4.69564e-19	0.524402	0.899	0.689	8.3526e-15
STOM	6.1548e-19	0.373975	0.676	0.391	1.09482e-14
NRP2	1.77704e-18	0.496627	0.702	0.41	3.16099e-14
CHCHD10	2.77648e-18	0.335298	0.984	0.888	4.9388e-14
NCOA1	3.74341e-18	0.421492	0.888	0.723	6.65878e-14
TXNIP	6.61375e-18	0.440405	0.973	0.939	1.17645e-13
NDRG4	8.3293e-18	0.363668	0.75	0.478	1.48162e-13
BIN1	8.56559e-18	0.309487	0.707	0.402	1.52365e-13
SST	1.00119e-17	1.30313	0.25	0.056	1.78091e-13
CYR61	2.14555e-17	0.480007	0.75	0.524	3.81651e-13
PDHA1	2.15332e-17	0.339814	0.984	0.905	3.83033e-13
PRR16	2.87179e-17	0.294715	0.431	0.162	5.10833e-13
ISCU	3.98724e-17	0.295327	0.91	0.839	7.09251e-13
FABP5	5.85034e-17	0.963268	0.723	0.52	1.04066e-12
CDK6	6.95257e-17	0.437213	0.92	0.766	1.23672e-12
PKIG	8.47054e-17	0.466697	0.803	0.61	1.50674e-12
FZD4	8.62107e-17	0.276082	0.553	0.268	1.53352e-12
B3GNT7	8.84104e-17	0.299342	0.67	0.402	1.57264e-12
UQCRC1	9.13351e-17	0.32385	0.91	0.812	1.62467e-12
NDUFV1	1.27708e-16	0.290343	0.899	0.771	2.27167e-12
JUNB	1.36312e-16	0.332513	0.723	0.421	2.42471e-12
HIGD1A	1.72952e-16	0.365326	0.926	0.817	3.07647e-12
MYO6	1.86555e-16	0.401313	0.819	0.6	3.31843e-12
THBS1	2.59668e-16	0.335593	0.559	0.267	4.61898e-12
SOD3	2.91256e-16	0.356593	0.633	0.364	5.18086e-12
VEGFC	3.15328e-16	0.475055	0.729	0.512	5.60905e-12
DNAJC15	3.24589e-16	0.805102	0.936	0.836	5.77379e-12
COX5B	3.32713e-16	0.302922	0.979	0.946	5.91829e-12
MID1	3.73242e-16	0.392319	0.862	0.704	6.63922e-12
AKIRIN1	3.84629e-16	0.297267	0.92	0.847	6.84178e-12
PTCHD1	4.50007e-16	0.254519	0.287	0.082	8.00473e-12
LPHN2	6.17442e-16	0.434079	0.553	0.288	1.09831e-11
ATP5O	6.42859e-16	0.266647	0.995	0.975	1.14352e-11
GOT2	6.97945e-16	0.291156	0.883	0.74	1.24151e-11
ATP5C1	1.20491e-15	0.283751	0.995	0.978	2.14329e-11
NDRG2	1.5885e-15	0.333962	0.92	0.761	2.82562e-11
IL6ST	1.68927e-15	0.394339	0.931	0.884	3.00487e-11
GOT1	3.11706e-15	0.33687	0.957	0.832	5.54462e-11
SEMA3D	3.1382e-15	0.417765	0.431	0.181	5.58224e-11
MXRA8	3.56549e-15	0.311567	0.723	0.446	6.3423e-11
LPCAT4	3.8004e-15	0.370412	0.793	0.544	6.76015e-11
BSG	4.3483e-15	0.25812	0.973	0.926	7.73476e-11
GNAI1	6.53058e-15	0.286218	0.574	0.294	1.16166e-10
CYC1	1.01916e-14	0.288477	0.947	0.87	1.81288e-10
AKR1B15	1.02149e-14	0.318249	0.271	0.079	1.81702e-10
JUN	1.42426e-14	0.36849	0.681	0.427	2.53348e-10
SRGAP1	1.53e-14	0.335548	0.638	0.375	2.72156e-10
TSC22D1	1.77711e-14	0.31005	1	0.954	3.16113e-10
SH3BGRL2	1.81772e-14	0.259552	0.665	0.404	3.23335e-10
CGNL1	1.92319e-14	0.356163	0.957	0.831	3.42097e-10
ALPK2	2.21522e-14	0.314654	0.963	0.763	3.94043e-10
LMO3	3.32141e-14	0.370464	0.484	0.23	5.90812e-10
RAB12	4.1202e-14	0.39555	0.75	0.551	7.32901e-10
FOS	4.25958e-14	0.327511	0.489	0.232	7.57694e-10
NQO2	4.42732e-14	0.283443	0.622	0.378	7.87532e-10
LRPAP1	4.6691e-14	0.267419	0.888	0.716	8.3054e-10
IER3	4.92557e-14	0.255693	0.665	0.358	8.7616e-10
SCARB2	5.21752e-14	0.347054	0.931	0.799	9.28092e-10
AGAP1	5.78231e-14	0.27012	0.686	0.464	1.02856e-09
TMEM66	5.79986e-14	0.39241	0.612	0.37	1.03168e-09
COX6A1	6.53764e-14	0.278913	0.995	0.982	1.16292e-09
FH	7.88193e-14	0.268125	0.867	0.683	1.40204e-09
RASL11B	8.51331e-14	0.33936	0.793	0.562	1.51435e-09
DENND5B	1.19231e-13	0.273125	0.888	0.745	2.12089e-09
FAM69B	1.72095e-13	0.291332	0.798	0.606	3.06123e-09
APOA1BP	2.32966e-13	0.261605	0.463	0.232	4.14399e-09
UQCRFS1	2.6107e-13	0.26555	0.973	0.914	4.64392e-09
MTFR1L	3.13109e-13	0.300662	0.846	0.706	5.56957e-09
CRISPLD1	3.40028e-13	0.383639	0.612	0.371	6.04842e-09
PEG10	4.06637e-13	0.62397	0.846	0.669	7.23326e-09
GHITM	4.1675e-13	0.300446	0.931	0.86	7.41315e-09
GAS6	5.70207e-13	0.309648	0.835	0.615	1.01428e-08
GSTK1	5.951e-13	0.257651	0.894	0.766	1.05856e-08
ALAD	7.20361e-13	0.279121	0.681	0.453	1.28138e-08
SLC39A8	7.45906e-13	0.334377	0.612	0.378	1.32682e-08
SOD1	8.26987e-13	0.254106	0.957	0.94	1.47105e-08
CPEB4	9.96347e-13	0.332338	0.915	0.788	1.7723e-08
LAMB1	1.04243e-12	0.294083	0.798	0.544	1.85427e-08
LTBP1	1.12414e-12	0.315386	0.915	0.787	1.99962e-08
NGFRAP1	1.28724e-12	0.543402	0.649	0.407	2.28974e-08
KLHDC5	1.55641e-12	0.330851	0.495	0.261	2.76854e-08
ECI1	2.2098e-12	0.285242	0.888	0.754	3.93078e-08
LDLR	2.25848e-12	0.275556	0.75	0.502	4.01739e-08
MRC2	2.99131e-12	0.289708	0.809	0.583	5.32094e-08
RSPO3	3.26282e-12	0.430503	0.723	0.458	5.80391e-08
TAX1BP1	3.80058e-12	0.36714	0.952	0.858	6.76047e-08
EHD3	5.25975e-12	0.293394	0.665	0.432	9.35605e-08
ATP5G1	6.07263e-12	0.292066	0.904	0.803	1.0802e-07
GSTT1	8.16597e-12	0.292205	0.548	0.315	1.45256e-07
NOD1	1.0742e-11	0.256712	0.59	0.372	1.9108e-07
ITFG3	1.23469e-11	0.288977	0.527	0.289	2.19626e-07
CTSL2	2.11072e-11	0.403199	0.426	0.211	3.75454e-07
PRDX4	3.48473e-11	0.363414	0.846	0.695	6.19864e-07
SMCR7L	3.89676e-11	0.250387	0.468	0.246	6.93156e-07
CXCL14	4.04386e-11	0.573155	0.245	0.086	7.19321e-07
CRYZ	4.7113e-11	0.324412	0.723	0.52	8.38045e-07
MT-ND5	4.80808e-11	0.254766	1	1	8.55262e-07
HMGN3	7.36294e-11	0.261349	0.963	0.897	1.30972e-06
ADAM9	7.64537e-11	0.314744	0.723	0.542	1.35996e-06
DUSP1	7.99294e-11	0.287261	0.447	0.232	1.42178e-06
RAP2C	9.66977e-11	0.261689	0.654	0.472	1.72006e-06
PROX1	1.01382e-10	0.378547	0.793	0.585	1.80337e-06
HLA-A	1.18329e-10	0.30484	0.819	0.636	2.10484e-06
NHP2L1	1.29139e-10	0.298237	0.59	0.358	2.29713e-06
SEMA3C	2.18091e-10	0.275123	0.697	0.451	3.87941e-06
DCBLD2	2.68002e-10	0.293184	0.92	0.842	4.76722e-06
PKP2	3.21739e-10	0.279469	0.952	0.855	5.72309e-06
WSB1	7.60785e-10	0.254697	0.989	0.96	1.35328e-05
MGEA5	8.97507e-10	0.254463	0.931	0.863	1.59649e-05
SLIT3	1.16926e-09	0.381513	0.926	0.834	2.07988e-05
PLTP	1.45709e-09	0.296012	0.67	0.456	2.59188e-05
PKDCC	2.0457e-09	0.345896	0.798	0.655	3.6389e-05
YARS	2.4218e-09	0.260089	0.755	0.622	4.30789e-05
LINC00657	3.44633e-09	0.277992	0.628	0.38	6.13034e-05
SH3BP4	5.12757e-09	0.267609	0.793	0.623	9.12093e-05
SLC25A4	5.80625e-09	0.267989	0.984	0.915	0.000103282
ANK3	6.46105e-09	0.252869	0.899	0.781	0.000114929
ANXA2	9.10365e-09	0.261822	0.979	0.941	0.000161936
H19	1.19248e-08	1.17627	0.622	0.419	0.000212119
IDH1	1.54206e-08	0.259148	0.851	0.717	0.000274301
RHOBTB3	2.12676e-08	0.266302	0.989	0.968	0.000378307
ADD3	2.31775e-08	0.357003	0.931	0.903	0.000412282
FRMD3	2.64885e-08	0.270787	0.644	0.464	0.000471177
ST3GAL1	3.3808e-08	0.283177	0.835	0.762	0.000601376
LGALSL	5.84358e-08	0.316385	0.585	0.396	0.00103946
BTG2	7.46514e-08	0.271391	0.574	0.415	0.0013279
C1GALT1	1.35824e-07	0.273999	0.66	0.509	0.00241603
PDK1	1.63269e-07	0.322635	0.926	0.874	0.00290424
PBX1	2.6972e-07	0.25371	0.936	0.932	0.00479779
RGS4	4.6408e-07	0.704977	0.415	0.247	0.00825506
CFLAR	1.15169e-06	0.256384	0.915	0.875	0.0204862
SGK1	1.78422e-06	0.274119	0.335	0.188	0.0317378
SLC38A1	3.46178e-06	0.287515	0.878	0.813	0.0615782
LEPROTL1	7.57159e-06	0.319641	0.766	0.668	0.134683
EPHA4	1.03248e-05	0.261575	0.356	0.221	0.183658
FREM2	2.73342e-05	0.290833	0.649	0.512	0.486221
HHATL	3.41653e-05	0.259044	0.245	0.135	0.607733
AQP1	0.000142679	0.25156	0.479	0.362	1
TBC1D1	0.000198013	0.286126	0.654	0.536	1
CDC42EP3	0.000775348	0.281149	0.894	0.822	1
RGS5	0.00191697	0.302376	0.803	0.778	1
POSTN	0.0577487	0.344831	0.245	0.193	1

## Sheet: cluster 2
	p_val	avg_logFC	pct.1	pct.2	p_val_adj
C12orf75	1.2388e-53	1.00434	0.975	0.516	2.20357e-49		as shown in Figure 3
VCAM1	2.52154e-53	1.17961	0.884	0.261	4.48531e-49
ABRA	9.99355e-50	0.758882	0.752	0.182	1.77765e-45
HOPX	3.82273e-44	0.715981	0.686	0.165	6.79988e-40
NGFR	1.38157e-43	1.05389	0.826	0.27	2.45754e-39
DPYSL3	2.5508e-43	0.965885	0.992	0.799	4.53736e-39
MYH7	6.73272e-43	1.46285	0.959	0.559	1.19762e-38
RSPO3	3.30702e-42	1.21462	0.934	0.45	5.88252e-38
ALPK2	2.69161e-39	0.826785	0.983	0.774	4.78783e-35
MASP1	5.09079e-37	0.940738	0.95	0.508	9.0555e-33
ACTN2	4.77405e-35	0.818142	1	0.888	8.49208e-31
FAM189A2	1.30328e-33	0.856152	0.967	0.651	2.31828e-29
WNT5B	4.85461e-33	0.365784	0.612	0.161	8.63537e-29
SORBS2	4.78531e-32	0.677522	1	0.902	8.51211e-28
NKX2-5	9.4791e-32	0.651794	0.959	0.542	1.68614e-27
CYP2J2	1.88869e-31	0.410518	0.504	0.11	3.3596e-27
MYL2	2.39527e-30	1.1429	0.628	0.184	4.2607e-26
LMOD2	3.86269e-29	0.517433	0.686	0.218	6.87095e-25
ANK3	1.25522e-28	0.592587	0.967	0.781	2.23278e-24
TNFRSF19	1.68348e-28	0.661917	0.893	0.457	2.99457e-24
XIRP1	5.30654e-26	0.957457	0.942	0.686	9.43927e-22
PLCXD3	6.88867e-26	0.465587	0.702	0.267	1.22536e-21
TBX2	8.60796e-26	0.708674	0.876	0.503	1.53118e-21
SMYD1	1.79019e-25	0.534891	0.975	0.8	3.18438e-21
ATF3	7.59883e-25	0.500625	0.603	0.191	1.35168e-20
TSPAN7	1.87219e-24	0.440514	0.785	0.362	3.33026e-20
F11R	1.88142e-24	0.388799	0.678	0.275	3.34667e-20
ANKRD1	2.49236e-24	0.630485	0.769	0.325	4.4334e-20
NR4A1	9.17406e-24	0.458307	0.537	0.158	1.63188e-19
REEP6	3.05938e-23	0.292599	0.57	0.181	5.44202e-19
COL2A1	9.28963e-23	0.51378	1	0.925	1.65244e-18
LBH	1.09739e-22	0.74447	0.934	0.701	1.95203e-18
BANCR	1.185e-22	0.453377	0.413	0.099	2.10789e-18
CDKN1A	6.45189e-22	0.665236	0.727	0.319	1.14766e-17
UACA	8.98106e-22	0.620612	0.926	0.718	1.59755e-17
GPRIN3	2.29697e-21	0.459116	0.653	0.264	4.08585e-17
TFPI2	2.43421e-21	0.446265	0.314	0.06	4.32998e-17
SLIT3	4.25856e-21	0.489499	1	0.831	7.57513e-17
EMILIN2	8.92244e-21	0.464031	0.884	0.535	1.58712e-16
SYNGR3	4.27604e-20	0.273084	0.537	0.186	7.60622e-16
CSRP3	5.41036e-20	0.715107	0.975	0.713	9.62395e-16
RHOBTB3	1.05451e-19	0.376582	1	0.968	1.87577e-15
LRRC10	2.67565e-19	0.38463	0.826	0.431	4.75944e-15
MT-ATP6	5.08609e-19	0.268334	1	1	9.04713e-15
PHACTR2	8.18277e-19	0.454255	0.926	0.663	1.45555e-14
MT-ND3	9.48771e-19	0.30613	1	1	1.68767e-14
TNFRSF12A	1.35417e-18	0.469787	0.802	0.448	2.4088e-14
LYPLA1	2.29307e-18	0.389361	0.934	0.771	4.07892e-14
TNNI1	4.47038e-18	0.36792	1	0.99	7.95192e-14
MT-ND5	5.5499e-18	0.382149	1	1	9.87217e-14
AGL	6.57534e-18	0.407463	0.926	0.737	1.16962e-13
XPO4	6.76252e-18	0.57284	0.917	0.702	1.20292e-13
LINGO1	7.25955e-18	0.267824	0.488	0.162	1.29133e-13
MT-ND2	5.15814e-17	0.290972	1	1	9.17529e-13
NAV1	1.07444e-16	0.523013	0.818	0.467	1.91121e-12
THBS1	1.18676e-16	0.377166	0.628	0.279	2.11101e-12
SRP14	4.37544e-16	0.337979	1	0.99	7.78304e-12
PEG10	5.2457e-16	0.514781	0.917	0.673	9.33106e-12
ZAK	5.72885e-16	0.393044	0.992	0.933	1.01905e-11
CCNB1IP1	6.76981e-16	0.363434	0.95	0.838	1.20421e-11
KIF1A	7.96937e-16	0.263779	0.488	0.181	1.41759e-11
HSPB1	8.03443e-16	0.415923	1	1	1.42916e-11
ID2	1.29508e-15	0.440639	0.992	0.871	2.30369e-11
EPHB3	2.18539e-15	0.353793	0.736	0.423	3.88737e-11
ZFP36L1	4.11436e-15	0.398827	1	0.98	7.31863e-11
SRPK3	5.51445e-15	0.276949	0.504	0.196	9.80911e-11
RTN4	8.4556e-15	0.30455	0.992	0.989	1.50408e-10
ANXA6	1.06893e-14	0.319263	0.992	0.916	1.90142e-10
LDB3	1.71221e-14	0.474079	0.967	0.824	3.04567e-10
CTGF	1.76469e-14	0.275786	0.835	0.502	3.13903e-10
UGP2	2.55673e-14	0.449068	1	0.945	4.54791e-10
NUDT4	2.72341e-14	0.366448	0.884	0.635	4.8444e-10
SYNPO2L	3.56732e-14	0.531044	0.901	0.672	6.34554e-10
SPON1	6.43456e-14	0.341139	0.645	0.307	1.14458e-09
COX6A2	6.71454e-14	0.269352	0.603	0.275	1.19438e-09
LOC100506548	7.67683e-14	0.360151	0.917	0.799	1.36555e-09
RAPGEF2	7.79701e-14	0.349239	0.826	0.577	1.38693e-09
LAMA1	1.01939e-13	0.33235	0.769	0.482	1.81328e-09
FAM84B	1.26073e-13	0.3588	0.926	0.662	2.24258e-09
RBM38	1.53106e-13	0.382948	0.95	0.783	2.72345e-09
KDR	1.76019e-13	0.263657	0.471	0.184	3.13103e-09
PALM2	1.89152e-13	0.325151	0.81	0.53	3.36464e-09
PDK1	2.66762e-13	0.369668	0.983	0.87	4.74516e-09
HSPB7	2.72279e-13	0.472371	0.983	0.929	4.8433e-09
FHOD3	2.74108e-13	0.345017	0.934	0.694	4.87584e-09
XPR1	3.19842e-13	0.405654	0.934	0.737	5.68935e-09
GRIN2A	4.62089e-13	0.281688	0.636	0.296	8.21964e-09
TMEM245	6.35934e-13	0.362488	0.983	0.914	1.1312e-08
MT-CO1	8.82859e-13	0.284733	1	1	1.57043e-08
BMP2	1.14568e-12	0.448007	0.942	0.684	2.03794e-08
LACC1	1.70849e-12	0.371192	0.702	0.417	3.03905e-08
SLC4A4	1.77308e-12	0.261706	0.529	0.241	3.15396e-08
LMO4	2.19851e-12	0.307148	0.975	0.888	3.91071e-08
KIF21A	2.78273e-12	0.366846	0.893	0.728	4.94992e-08
ENO2	3.92118e-12	0.305535	0.727	0.428	6.97499e-08
PDGFD	4.56628e-12	0.317298	0.702	0.401	8.12249e-08
C7orf41	9.81131e-12	0.42237	0.504	0.251	1.74524e-07
LGI2	1.01162e-11	0.330831	0.893	0.647	1.79948e-07
CDH3	1.09362e-11	0.259588	0.686	0.387	1.94534e-07
MALT1	1.28798e-11	0.338941	0.835	0.626	2.29106e-07
MYL3	1.90209e-11	0.297094	0.901	0.584	3.38343e-07
S1PR1	1.94915e-11	0.277075	0.645	0.353	3.46715e-07
PYGM	3.21438e-11	0.264633	0.843	0.572	5.71774e-07
SLC2A3	3.30853e-11	0.351406	0.785	0.543	5.88521e-07
KCTD12	4.35438e-11	0.384514	0.818	0.553	7.74557e-07
CKMT2	4.73754e-11	0.268931	0.636	0.347	8.42713e-07
ANKRD9	7.08928e-11	0.28411	0.884	0.63	1.26104e-06
PTRF	1.14159e-10	0.291108	0.793	0.505	2.03065e-06
SIPA1L2	1.38583e-10	0.32418	0.967	0.847	2.46511e-06
MYO6	2.73271e-10	0.322	0.835	0.613	4.86095e-06
TMOD1	5.0615e-10	0.273385	0.843	0.666	9.00339e-06
JUND	8.58744e-10	0.325573	0.95	0.816	1.52753e-05
GNG11	9.8399e-10	0.300081	0.579	0.32	1.75032e-05
KAT6B	1.29108e-09	0.321561	0.818	0.574	2.29658e-05
FBXO18	1.33e-09	0.259152	0.868	0.753	2.36581e-05
SSR3	1.48115e-09	0.287865	0.967	0.854	2.63467e-05
MYL7	1.55384e-09	0.381905	1	0.994	2.76396e-05
MYOZ2	1.92699e-09	0.28684	0.95	0.738	3.42774e-05
NAMPT	2.02151e-09	0.256498	0.777	0.538	3.59587e-05
MT-ND4L	2.63339e-09	0.321957	1	0.981	4.68427e-05
CYR61	3.55121e-09	0.276383	0.793	0.534	6.3169e-05
SOX11	5.95159e-09	0.2586	0.835	0.615	0.000105867
FGF18	6.04211e-09	0.353257	0.496	0.254	0.000107477
ID1	1.1768e-08	0.288031	0.752	0.516	0.00020933
OBSL1	1.84902e-08	0.262251	0.95	0.881	0.000328904
ATP13A3	2.04664e-08	0.284948	0.926	0.821	0.000364056
LGMN	2.05082e-08	0.275397	0.868	0.696	0.000364801
FBN2	2.59934e-08	0.325594	0.967	0.824	0.000462371
GATA4	2.59974e-08	0.262026	1	0.951	0.000462442
CD24	2.75949e-08	0.47023	0.421	0.219	0.000490859
NEBL	4.74947e-08	0.273765	0.992	0.902	0.000844836
ENO3	4.78467e-08	0.301805	0.942	0.766	0.000851098
EXTL3	5.47762e-08	0.300077	0.752	0.625	0.00097436
FLNC	1.23813e-07	0.313631	0.926	0.821	0.00220239
SAMD4A	2.55011e-07	0.285008	0.744	0.606	0.00453614
TTN	5.97538e-07	0.286685	1	0.997	0.010629
SDCBP	7.7817e-07	0.251024	0.868	0.744	0.0138421
DGKH	9.97916e-07	0.284593	0.504	0.314	0.0177509
GOLIM4	1.02135e-06	0.372231	0.826	0.743	0.0181678
TRIB1	2.59964e-06	0.252927	0.802	0.616	0.0462424
ADAMTS19	0.000654917	0.316	0.504	0.35	1
PKIG	0.000750892	0.299912	0.736	0.632	1
LEFTY2	0.000777369	0.314678	0.43	0.268	1
TGFB2	0.00153363	0.324737	0.669	0.597	1
DES	0.00180797	0.30335	0.579	0.485	1
CRYAB	0.00501214	0.397177	0.959	0.931	1

## Sheet: cluster 3
	p_val	avg_logFC	pct.1	pct.2	p_val_adj
AHNAK2	2.61025e-64	0.775313	0.866	0.133	4.64311e-60		as shown in Figure 3
IRX4	3.67075e-62	0.541646	0.561	0.041	6.52953e-58
MYL2	9.42566e-58	1.45996	0.89	0.18	1.67664e-53
SLC27A6	2.73692e-51	0.384966	0.598	0.066	4.86843e-47
VCAM1	5.80855e-45	1.06829	0.963	0.279	1.03323e-40
BANCR	8.38011e-44	0.704381	0.622	0.094	1.49065e-39
LAMA4	1.1e-42	0.600354	0.817	0.182	1.95667e-38
FGF18	9.22719e-42	0.948117	0.878	0.232	1.64133e-37
NAV1	1.58265e-38	1.19469	0.976	0.468	2.81522e-34
FBN2	3.76748e-36	1.12221	1	0.827	6.7016e-32
FAM189A2	5.27458e-34	1.04826	0.988	0.661	9.38242e-30
TNFRSF19	3.95783e-32	1.09988	0.915	0.473	7.04019e-28
MYH7	4.17442e-31	1.23019	0.988	0.572	7.42546e-27
ALCAM	4.78884e-30	0.668713	0.841	0.306	8.51839e-26
HEY2	2.36469e-29	0.389924	0.646	0.137	4.20631e-25
ADAMTS19	1.04601e-26	0.647121	0.829	0.33	1.86064e-22
IRX3	2.39154e-26	0.408114	0.671	0.18	4.25407e-22
LINGO1	1.23212e-23	0.319316	0.61	0.165	2.19169e-19
LEFTY2	7.27203e-23	0.661962	0.732	0.25	1.29355e-18
HAND1	1.94564e-22	0.416731	0.561	0.154	3.46091e-18
LOC100498859	1.0126e-21	0.451143	0.476	0.114	1.80121e-17
NREP	3.4544e-21	0.692965	1	0.967	6.14468e-17
FHL2	4.50801e-21	0.831497	0.902	0.615	8.01884e-17
GAS5	6.72432e-21	0.549324	0.988	0.766	1.19612e-16
SORBS2	3.59088e-20	0.603438	1	0.906	6.38746e-16
ALPK2	5.78634e-20	0.555866	0.988	0.782	1.02927e-15
CCNB1IP1	1.12857e-19	0.503029	0.988	0.839	2.00751e-15
HSPB7	7.41829e-19	0.58311	1	0.93	1.31957e-14
PDGFD	1.52408e-18	0.495839	0.817	0.404	2.71104e-14
KCNQ5	3.18594e-18	0.374332	0.683	0.268	5.66714e-14
PLCXD3	5.81612e-18	0.446105	0.707	0.284	1.03457e-13
CORIN	1.2272e-17	0.458027	0.866	0.434	2.18295e-13
LOC100506548	2.27631e-17	0.494118	0.976	0.799	4.0491e-13
CFC1	8.2308e-17	0.251814	0.415	0.102	1.4641e-12
NKX2-5	2.02723e-16	0.453444	0.976	0.556	3.60604e-12
EEF1A1	2.08918e-16	0.299636	1	1	3.71624e-12
RHOQ	4.71151e-16	0.509214	0.963	0.819	8.38084e-12
ISOC1	5.73988e-16	0.613348	0.756	0.449	1.02101e-11
MT-ND2	5.74724e-16	0.383967	1	1	1.02232e-11
CLDN6	6.90975e-16	0.426791	0.866	0.469	1.22911e-11
LRRC10	1.948e-15	0.409866	0.866	0.444	3.46511e-11
TMEM56	2.03286e-15	0.362057	0.805	0.376	3.61606e-11
RPS2	7.76321e-15	0.309307	1	1	1.38092e-10
MYL3	9.843e-15	0.395399	0.963	0.591	1.75087e-10
EGFEM1P	2.81743e-14	0.3039	0.561	0.21	5.01165e-10
RPL13	4.19784e-14	0.3329	1	0.999	7.46712e-10
TNNI1	4.77882e-14	0.316802	1	0.99	8.50057e-10
CACHD1	9.5694e-14	0.36253	0.695	0.348	1.70221e-09
SMYD1	1.12684e-13	0.42021	0.988	0.806	2.00443e-09
RPLP0	1.62813e-13	0.404948	1	0.983	2.89611e-09
RPL8	1.6783e-13	0.320835	1	0.985	2.98536e-09
IRS1	3.96709e-13	0.311647	0.646	0.283	7.05667e-09
ATP13A3	4.39007e-13	0.410934	0.939	0.824	7.80905e-09
RPL10	5.43666e-13	0.303054	1	0.999	9.67073e-09
RPS8	5.73797e-13	0.297978	1	1	1.02067e-08
ZFP36L1	5.92572e-13	0.39687	1	0.981	1.05407e-08
MT-ND3	8.2247e-13	0.278214	1	1	1.46301e-08
KCTD12	8.73604e-13	0.327643	0.915	0.555	1.55397e-08
FAM84B	1.00952e-12	0.371942	0.939	0.671	1.79574e-08
MT-ATP6	1.65142e-12	0.250149	1	1	2.93754e-08
EEF1B2	4.04355e-12	0.321668	1	0.966	7.19267e-08
SLIT3	4.73893e-12	0.374749	0.988	0.838	8.4296e-08
ACTN2	4.77319e-12	0.421313	1	0.892	8.49055e-08
RPS24	6.05906e-12	0.306111	1	0.998	1.07779e-07
MTUS2	6.39897e-12	0.388634	0.89	0.588	1.13825e-07
EEF2	8.31088e-12	0.300976	1	0.998	1.47834e-07
EMILIN2	8.79046e-12	0.376985	0.854	0.551	1.56365e-07
ATP1A1	1.08829e-11	0.366025	1	0.895	1.93585e-07
ATP1B1	1.09769e-11	0.484786	0.988	0.833	1.95257e-07
RPL18A	1.74572e-11	0.260517	1	0.999	3.10529e-07
CACNA1C	2.34286e-11	0.288127	0.768	0.386	4.16749e-07
SNHG16	3.63379e-11	0.312562	1	0.946	6.46378e-07
RPS3	3.94493e-11	0.282759	1	0.989	7.01725e-07
COL21A1	5.1706e-11	0.263539	0.561	0.229	9.19747e-07
FHOD3	7.00354e-11	0.364301	0.939	0.703	1.24579e-06
ETV1	7.01244e-11	0.601511	0.841	0.599	1.24737e-06
PKP2	7.86289e-11	0.343026	1	0.861	1.39865e-06
ANKH	8.17465e-11	0.266341	0.561	0.261	1.45411e-06
PDLIM5	1.37321e-10	0.345456	1	0.993	2.44266e-06
RPS23	1.47618e-10	0.257705	1	0.999	2.62582e-06
ZNF330	1.6174e-10	0.30658	0.866	0.563	2.87704e-06
VCAN	1.99696e-10	0.610813	0.988	0.889	3.55219e-06
RPS19	2.07015e-10	0.288314	1	0.985	3.68238e-06
EEF1A2	2.13467e-10	0.362238	0.988	0.829	3.79715e-06
KRT19	2.13593e-10	0.264446	0.659	0.314	3.79939e-06
GNG11	2.14484e-10	0.341095	0.646	0.325	3.81525e-06
GPRIN3	2.81393e-10	0.277909	0.598	0.284	5.00542e-06
RPL13A	2.92689e-10	0.295217	1	0.958	5.20635e-06
RPS5	4.72813e-10	0.285998	1	0.989	8.4104e-06
DOK4	4.85601e-10	0.399242	0.988	0.879	8.63787e-06
NUDT4	6.17727e-10	0.344743	0.89	0.644	1.09881e-05
HSPB1	6.43486e-10	0.301803	1	1	1.14463e-05
SH3PXD2A	7.1174e-10	0.287943	0.854	0.574	1.26604e-05
PYCR1	8.62413e-10	0.26678	0.72	0.387	1.53406e-05
RPL14	1.15684e-09	0.25552	1	0.996	2.05779e-05
QKI	1.77946e-09	0.280657	1	0.972	3.16531e-05
CPNE3	1.83861e-09	0.311601	0.963	0.76	3.27052e-05
LRRFIP1	2.56025e-09	0.416756	0.951	0.833	4.55418e-05
VDAC2	2.6585e-09	0.283383	1	0.969	4.72893e-05
C12orf75	2.71631e-09	0.255166	0.866	0.542	4.83177e-05
CYFIP2	3.82094e-09	0.273163	0.817	0.499	6.79669e-05
RPL30	4.21101e-09	0.251958	1	0.996	7.49054e-05
NGFR	4.46609e-09	0.344537	0.622	0.309	7.94427e-05
LAMA2	4.58728e-09	0.320619	0.902	0.561	8.15985e-05
SH3BGR	5.77307e-09	0.264139	0.439	0.176	0.000102691
SPHKAP	6.12903e-09	0.316669	0.988	0.719	0.000109023
MASP1	6.46979e-09	0.368103	0.817	0.536	0.000115085
FADS1	6.48297e-09	0.294553	0.988	0.881	0.000115319
TRAP1	8.90016e-09	0.257799	0.841	0.635	0.000158316
MT-ND5	9.2551e-09	0.324097	1	1	0.00016463
ANK3	9.76624e-09	0.316223	0.963	0.788	0.000173722
FASN	1.09499e-08	0.267095	0.915	0.693	0.000194777
CS	1.10986e-08	0.274493	1	0.944	0.000197423
RPS14	1.64059e-08	0.285361	1	0.981	0.000291828
XPO4	2.19103e-08	0.285734	0.951	0.707	0.00038974
EEF1G	3.30234e-08	0.254232	1	0.993	0.00058742
PPP1R3B	3.59532e-08	0.300701	0.793	0.561	0.000639536
SSR3	3.67246e-08	0.325234	0.963	0.859	0.000653257
CRNDE	4.57708e-08	0.284888	0.573	0.298	0.000814172
SMYD2	5.45081e-08	0.255808	0.72	0.46	0.000969591
XIRP1	7.22318e-08	0.288915	0.927	0.697	0.00128486
LPCAT4	7.65347e-08	0.252643	0.854	0.565	0.0013614
NAV2	9.4611e-08	0.310547	0.805	0.565	0.00168294
C6orf48	1.11194e-07	0.258606	0.988	0.896	0.00197793
ANKRD1	1.25415e-07	0.275721	0.634	0.354	0.00223089
ANGPT1	1.29467e-07	0.475956	0.439	0.21	0.00230296
SNHG6	1.50977e-07	0.285673	0.976	0.847	0.00268558
NAMPT	1.54549e-07	0.258358	0.768	0.548	0.00274911
CAP2	1.66172e-07	0.251248	0.988	0.906	0.00295587
PAICS	2.0496e-07	0.2598	0.841	0.678	0.00364583
LGR4	2.08017e-07	0.289422	0.89	0.698	0.00370021
EPHB3	2.99234e-07	0.277096	0.683	0.44	0.00532278
C17orf76-AS1	3.69797e-07	0.492374	0.61	0.42	0.00657795
COL18A1	3.71092e-07	0.261858	0.976	0.919	0.00660099
LBH	1.15747e-06	0.256523	0.951	0.708	0.020589
RCAN2	1.28031e-06	0.252686	0.841	0.578	0.0227742
MT-ND4L	1.99657e-06	0.288115	1	0.982	0.035515
ZNFX1-AS1	2.48461e-06	0.368544	0.585	0.375	0.0441962
RPS18	2.51608e-06	0.493073	0.866	0.741	0.0447561
SC5DL	3.20851e-06	0.443739	0.573	0.349	0.057073
NEXN	3.91207e-06	0.268389	0.988	0.905	0.0695879
SYNE2	4.91926e-06	0.48496	0.817	0.685	0.0875038
WNK2	5.251e-06	0.279756	0.707	0.517	0.0934048
LINC00881	6.0309e-06	0.324733	0.293	0.132	0.107278
GNB2L1	6.68513e-06	0.498378	0.61	0.437	0.118915
TTN	7.52295e-06	0.299912	1	0.997	0.133818
RAB12	8.77381e-06	0.278612	0.768	0.57	0.156069
STK39	1.03903e-05	0.257119	0.854	0.645	0.184823
CCDC34	1.44514e-05	0.30428	0.537	0.335	0.257062
RBM38	1.80579e-05	0.29372	0.89	0.794	0.321213
DGKH	2.04969e-05	0.295684	0.512	0.321	0.364598
FAM115A	0.00010494	0.30906	0.561	0.378	1

## Sheet: cluster 4
	p_val	avg_logFC	pct.1	pct.2	p_val_adj
MYL3	2.42027e-50	1.41382	0.991	0.578	4.30517e-46		as shown in Figure 3
PPP1R14C	2.95941e-50	0.691378	0.907	0.289	5.2642e-46
MB	4.96948e-50	1.56919	0.981	0.516	8.83971e-46
NPPA	7.43179e-48	2.32949	0.75	0.212	1.32197e-43
HAMP	1.0955e-47	0.996455	0.611	0.104	1.94868e-43
NREP	1.74157e-42	0.933481	1	0.966	3.0979e-38
TNNC1	1.68419e-41	0.913931	1	0.879	2.99584e-37
ADM	2.43142e-38	0.710675	0.657	0.166	4.32502e-34
LGALS3	6.9405e-38	0.544371	0.602	0.131	1.23458e-33
BVES	2.80548e-35	0.818425	0.907	0.549	4.99039e-31
CACNA1C	1.40469e-33	0.527233	0.861	0.365	2.49866e-29
POPDC3	1.47217e-33	0.706491	0.889	0.449	2.61869e-29
CAV1	1.00004e-32	0.814319	0.759	0.274	1.77887e-28
FHL2	3.32098e-30	0.857235	0.963	0.601	5.90736e-26
CPNE5	1.74706e-29	0.573583	0.694	0.229	3.10767e-25
RABGAP1L	4.33735e-29	0.64352	0.926	0.533	7.71528e-25
LDB3	1.57388e-27	0.732465	1	0.823	2.79961e-23
PARM1	1.6351e-27	0.423859	0.583	0.165	2.90852e-23
CRIP2	9.14693e-27	0.568303	0.991	0.899	1.62706e-22
LRRC10	6.60789e-26	0.632293	0.861	0.433	1.17541e-21
MYL4	8.88363e-26	0.664294	1	0.87	1.58022e-21
NEBL	1.00243e-25	0.615739	1	0.903	1.78313e-21
TNNT2	2.25208e-25	0.609839	1	0.979	4.006e-21
MYOZ2	6.34162e-25	0.62688	0.981	0.737	1.12805e-20
HSPB7	1.38525e-24	0.590811	1	0.928	2.46408e-20
QKI	2.34851e-24	0.449725	1	0.971	4.17753e-20
CSRP3	1.20274e-23	0.762965	0.991	0.715	2.13943e-19
MYBPC3	6.94977e-23	0.586281	0.991	0.809	1.23622e-18
CYFIP2	1.48715e-22	0.597635	0.852	0.486	2.64533e-18
CKM	2.61402e-22	0.687944	0.991	0.788	4.64981e-18
TRH	4.18058e-22	0.472889	0.861	0.384	7.43642e-18
CLDN6	1.06293e-21	0.4545	0.833	0.462	1.89075e-17
CLIC5	1.38414e-21	0.416758	0.704	0.292	2.46211e-17
NKX2-5	1.88312e-21	0.536696	0.963	0.547	3.3497e-17
HSPB2	2.76656e-20	0.512273	0.796	0.455	4.92116e-16
TRIM55	3.31637e-20	0.505562	0.88	0.615	5.89916e-16
ICA1	8.30772e-20	0.347578	0.713	0.323	1.47778e-15
MYH6	8.76702e-20	0.759481	0.981	0.839	1.55948e-15
ADAMTS19	9.88287e-20	0.422081	0.722	0.328	1.75797e-15
COL18A1	3.60321e-19	0.498214	0.991	0.916	6.40939e-15
MTUS1	5.04481e-19	0.512117	0.852	0.522	8.97371e-15
EIF1B	7.49675e-19	0.536598	0.935	0.854	1.33352e-14
NAV1	1.16809e-18	0.647598	0.852	0.468	2.0778e-14
FITM1	1.83526e-18	0.439484	0.935	0.494	3.26455e-14
AHNAK2	1.92398e-18	0.432378	0.491	0.155	3.42237e-14
ACTC1	9.9157e-18	0.489523	1	1	1.7638e-13
SPON1	1.94165e-17	0.440889	0.694	0.306	3.4538e-13
AKAP6	2.72528e-17	0.408903	0.667	0.322	4.84772e-13
TGM2	3.15128e-17	0.477466	0.769	0.425	5.6055e-13
RCAN2	1.63212e-16	0.435317	0.87	0.568	2.90321e-12
CRIP1	2.56922e-16	0.418277	0.722	0.418	4.57012e-12
PDE4DIP	3.65126e-16	0.431602	0.926	0.718	6.49487e-12
WEE1	5.2e-16	0.482052	0.926	0.772	9.24975e-12
DUSP5	5.44196e-16	0.353084	0.63	0.284	9.68016e-12
CORIN	7.42527e-16	0.493064	0.796	0.43	1.32081e-11
TNNI1	8.73095e-16	0.340481	1	0.99	1.55306e-11
PGM5	2.65661e-15	0.33336	0.722	0.384	4.72558e-11
DKK3	2.90749e-15	0.430474	0.926	0.747	5.17184e-11
SLC30A3	4.71535e-15	0.353242	0.787	0.45	8.38767e-11
KDR	4.79215e-15	0.437224	0.491	0.186	8.52427e-11
ACTN2	4.9749e-15	0.426492	1	0.889	8.84935e-11
MSX2	5.92246e-15	0.405564	0.565	0.247	1.05349e-10
SORBS2	6.05154e-15	0.457804	1	0.904	1.07645e-10
LAMA2	9.0726e-15	0.416646	0.88	0.555	1.61383e-10
FAM78A	9.64595e-15	0.414683	0.778	0.476	1.71582e-10
AKR1B1	9.82908e-15	0.482305	0.843	0.614	1.7484e-10
IRX4	1.11632e-14	0.325848	0.269	0.059	1.98572e-10
PPP1R1A	1.17526e-14	0.434337	0.944	0.68	2.09056e-10
LRRC49	2.27823e-14	0.286777	0.481	0.191	4.05252e-10
LDHA	2.75304e-14	0.401273	0.991	0.969	4.89711e-10
BMP2	2.78632e-14	1.08051	0.88	0.694	4.9563e-10
ACSL1	3.43265e-14	0.298755	0.472	0.178	6.106e-10
FXYD6	3.96911e-14	0.442778	0.944	0.784	7.06025e-10
TBX5	5.60033e-14	0.364552	0.954	0.557	9.96187e-10
MTUS2	6.09671e-14	0.405284	0.843	0.586	1.08448e-09
ABLIM1	7.86817e-14	0.379066	0.991	0.912	1.39959e-09
TECRL	7.98477e-14	0.394426	1	0.823	1.42033e-09
EDNRA	9.85055e-14	0.349274	0.954	0.731	1.75222e-09
PRKAG2	1.72543e-13	0.362598	0.796	0.521	3.06919e-09
TACC2	1.95466e-13	0.351459	0.759	0.473	3.47694e-09
ASPG	2.58789e-13	0.278929	0.519	0.228	4.60333e-09
FBN2	2.93383e-13	0.398231	0.935	0.83	5.21869e-09
RXRG	5.77377e-13	0.259469	0.537	0.226	1.02704e-08
HSPB3	7.46002e-13	0.296207	0.88	0.559	1.32699e-08
RBM24	7.63046e-13	0.359635	0.954	0.844	1.35731e-08
DLC1	7.71923e-13	0.402323	0.769	0.464	1.3731e-08
ITGB1BP2	7.84173e-13	0.326671	0.796	0.509	1.39489e-08
KIF26B	1.97004e-12	0.35268	0.731	0.483	3.5043e-08
TRDN	2.19306e-12	0.381191	0.981	0.795	3.90101e-08
BZW2	2.72903e-12	0.327341	0.944	0.855	4.85441e-08
USP28	3.34953e-12	0.345925	0.889	0.699	5.95814e-08
PLN	3.74862e-12	0.477655	0.991	0.809	6.66805e-08
TMOD1	5.27855e-12	0.327046	0.889	0.664	9.38949e-08
ISOC1	6.50305e-12	0.395216	0.694	0.447	1.15676e-07
RCSD1	8.88519e-12	0.384378	0.824	0.581	1.5805e-07
PLCXD3	2.29322e-11	0.268008	0.602	0.284	4.07918e-07
RHOQ	2.80036e-11	0.329074	0.917	0.821	4.98127e-07
PLXNA4	3.55947e-11	0.256259	0.454	0.193	6.33158e-07
MTSS1	3.94249e-11	0.308112	0.648	0.375	7.01291e-07
ADPRHL1	3.96304e-11	0.343013	0.944	0.746	7.04946e-07
PPP1R3C	4.46399e-11	0.366607	0.833	0.606	7.94055e-07
XIRP1	4.80168e-11	0.369062	0.898	0.694	8.54123e-07
MAN1C1	5.17656e-11	0.261302	0.602	0.314	9.20807e-07
HCN4	9.02385e-11	0.350148	0.944	0.683	1.60516e-06
RRAD	9.78926e-11	0.339057	0.88	0.591	1.74131e-06
SLC8A1	1.00418e-10	0.351142	1	0.92	1.78624e-06
PRSS35	1.17241e-10	0.266926	0.796	0.541	2.08548e-06
MLIP	1.39976e-10	0.284554	0.815	0.601	2.48989e-06
ZFP36L1	1.42752e-10	0.345967	1	0.981	2.53927e-06
RYR2	2.10804e-10	0.333853	1	0.848	3.74978e-06
HAND2	2.14112e-10	0.335117	0.954	0.848	3.80863e-06
PTPRK	2.47588e-10	0.269393	0.815	0.553	4.4041e-06
RNF115	2.68526e-10	0.314113	0.75	0.533	4.77654e-06
SH3KBP1	3.1877e-10	0.388833	0.778	0.555	5.67029e-06
HNRNPUL1	4.1341e-10	0.301536	0.972	0.923	7.35373e-06
NEXN	5.07381e-10	0.299392	0.954	0.907	9.02529e-06
MYL7	7.21487e-10	0.37119	1	0.994	1.28338e-05
FHOD3	7.37113e-10	0.278205	0.898	0.702	1.31118e-05
MYOCD	7.48652e-10	0.310093	0.852	0.656	1.3317e-05
SFRP1	7.49592e-10	0.298341	0.954	0.768	1.33337e-05
TNK2	8.28211e-10	0.315333	0.657	0.426	1.47322e-05
HADHB	9.42876e-10	0.326147	0.944	0.893	1.67719e-05
MYH7B	9.57397e-10	0.268319	0.75	0.459	1.70302e-05
CACNB2	1.35294e-09	0.295111	0.815	0.535	2.40661e-05
DOK4	1.59492e-09	0.430428	0.991	0.876	2.83704e-05
WNK1	1.60793e-09	0.341473	0.917	0.868	2.86019e-05
CAV2	1.67581e-09	0.382073	0.833	0.677	2.98093e-05
SVIL	2.2464e-09	0.28056	0.935	0.84	3.9959e-05
ATP2B4	2.56301e-09	0.324827	0.935	0.844	4.55908e-05
ENO3	2.68082e-09	0.314425	0.944	0.768	4.76864e-05
SYNPO2L	3.37008e-09	0.462102	0.861	0.679	5.9947e-05
HNRNPA1	3.57883e-09	0.326861	1	0.985	6.36602e-05
PRNP	4.49975e-09	0.261082	0.713	0.469	8.00415e-05
SIPA1L1	7.62797e-09	0.277598	0.63	0.378	0.000135686
SIPA1L2	7.8213e-09	0.280366	0.944	0.851	0.000139125
ENO1	8.44877e-09	0.27617	1	0.99	0.000150287
LMOD2	1.0805e-08	0.58329	0.481	0.247	0.000192199
INAFM2	1.10659e-08	0.286837	0.444	0.226	0.00019684
FAM134B	1.49619e-08	0.251348	0.565	0.324	0.000266141
C4orf3	1.6335e-08	0.295101	0.935	0.846	0.000290568
HSPB1	2.19974e-08	0.261121	1	1	0.00039129
TMEM56	2.8455e-08	0.265592	0.602	0.387	0.000506158
MYOM1	2.97483e-08	0.271578	0.972	0.857	0.000529163
TTN	4.43419e-08	0.32863	1	0.997	0.000788754
NPPB	5.75931e-08	0.264203	0.167	0.043	0.00102447
ARHGAP26	6.81354e-08	0.272823	0.583	0.375	0.00121199
MYO18B	9.02621e-08	0.267789	0.759	0.613	0.00160558
TCEA3	1.11602e-07	0.270013	0.852	0.647	0.00198518
CITED4	1.22233e-07	0.262427	0.806	0.6	0.00217429
AFF1	1.38232e-07	0.29349	0.806	0.655	0.00245888
CTNNA3	1.56905e-07	0.255878	0.593	0.361	0.00279102
SRL	1.9604e-07	0.262651	0.565	0.337	0.00348715
SMYD1	4.0851e-07	0.254779	0.935	0.807	0.00726658
SORD	4.52739e-07	0.401867	0.63	0.481	0.00805332
LRRC75A-AS1	5.16058e-07	0.456265	0.657	0.509	0.00917964
VCAN	5.89253e-07	0.470307	0.972	0.888	0.0104816
RBM38	8.74317e-07	0.261168	0.907	0.79	0.0155524
GYG1	1.0359e-06	0.315392	0.815	0.766	0.0184265
PALM2	1.27924e-06	0.28466	0.713	0.545	0.022755
C20orf166-AS1	1.59785e-06	0.273014	0.778	0.623	0.0284226
RBM20	2.91841e-06	0.272601	0.722	0.568	0.0519126
PDLIM1	3.68107e-06	0.253339	0.907	0.79	0.0654788
LOC729348	4.25537e-06	0.282405	0.574	0.373	0.0756946
NPTN-IT1	7.08569e-06	0.297929	0.5	0.311	0.12604
HAND2-AS1	9.94592e-06	0.258061	0.481	0.297	0.176918
PRICKLE1	1.94857e-05	0.254984	0.778	0.657	0.346612
RACK1	2.41803e-05	0.326003	0.667	0.535	0.430119
STARD4	4.42554e-05	0.315066	0.519	0.372	0.787215
GNAO1	9.70772e-05	0.268849	0.315	0.176	1
HACD1	0.000178526	0.262084	0.565	0.41	1
SYNE2	0.000374689	0.312087	0.769	0.687	1
ANKRD1	0.103636	0.45948	0.417	0.37	1

## Sheet: cluster 5
	p_val	avg_logFC	pct.1	pct.2	p_val_adj
KCNIP2	1.36769e-36	1.0847	0.94	0.54	2.43285e-32		as shown in Figure 3
PPP1R1A	1.77071e-33	0.838785	0.957	0.676	3.14974e-29
TRH	2.14334e-32	0.722892	0.906	0.374	3.81256e-28
PDGFRA	1.31378e-30	0.729281	0.923	0.484	2.33696e-26
PLN	3.63956e-30	0.73897	1	0.806	6.47405e-26
TECRL	8.73724e-28	0.725083	1	0.821	1.55418e-23
LPGAT1	3.98013e-27	0.664257	0.949	0.648	7.07985e-23
FITM1	5.38016e-25	0.617094	0.897	0.495	9.57023e-21
CACNA1D	2.34454e-24	0.428326	0.761	0.289	4.17046e-20
TRDN	2.43558e-23	0.544971	0.966	0.795	4.3324e-19
TNNT2	1.51289e-20	0.511326	1	0.979	2.69113e-16
RYR2	4.10862e-20	0.5117	0.983	0.849	7.30841e-16
NEBL	1.00349e-19	0.533945	1	0.902	1.78501e-15
MYH6	1.14836e-19	0.670122	0.991	0.836	2.04271e-15
NREP	1.85576e-19	0.509951	1	0.966	3.30103e-15
C1orf105	9.85378e-19	0.406777	0.675	0.303	1.75279e-14
MB	1.46822e-18	0.427631	0.863	0.526	2.61167e-14
ATP2A2	2.65444e-18	0.502415	1	0.978	4.72172e-14
PLXNA4	2.20091e-17	0.26964	0.521	0.182	3.91498e-13
SPHKAP	2.87784e-17	0.503185	0.957	0.713	5.1191e-13
SYNPO2	2.91462e-17	0.445197	0.778	0.442	5.18453e-13
PDE4DIP	6.80402e-17	0.418835	0.94	0.714	1.2103e-12
TBX5	8.81801e-17	0.41884	0.932	0.556	1.56855e-12
BTG1	1.06217e-16	0.425226	0.974	0.866	1.8894e-12
NR2F2	1.10308e-16	0.608432	0.923	0.661	1.96216e-12
ABCC9	1.17097e-16	0.253507	0.556	0.212	2.08293e-12
BMP7	1.49603e-16	0.390208	0.846	0.506	2.66114e-12
PAM	1.91744e-16	0.514417	1	0.908	3.41074e-12
PRDX1	2.99374e-16	0.518823	0.974	0.918	5.32526e-12
MYL4	3.89085e-16	0.473987	1	0.869	6.92104e-12
SLIT2	4.54217e-16	0.535056	0.932	0.701	8.07962e-12
ATP1A2	4.57417e-16	0.469825	0.812	0.483	8.13653e-12
LRRTM3	6.8318e-16	0.282042	0.496	0.172	1.21524e-11
CLIC5	1.37595e-15	0.362388	0.615	0.299	2.44753e-11
SLC8A1	1.44809e-15	0.438801	0.983	0.921	2.57586e-11
HAND2	1.64306e-15	0.416109	0.949	0.848	2.92267e-11
FRMPD4	4.26174e-15	0.250136	0.393	0.122	7.58078e-11
ADPRHL1	5.41884e-15	0.380436	0.94	0.744	9.63902e-11
MYBPC3	5.80667e-15	0.446425	0.983	0.808	1.03289e-10
SCP2	5.84861e-15	0.432809	0.906	0.753	1.04035e-10
ZC2HC1A	5.87007e-15	0.394886	0.915	0.698	1.04417e-10
NRXN1	6.88445e-15	0.417073	0.573	0.234	1.22461e-10
PPP1R12B	7.55301e-15	0.558679	0.991	0.91	1.34353e-10
TNNC1	8.03649e-15	0.465146	0.983	0.88	1.42953e-10
TSPAN2	8.5535e-15	0.369695	0.889	0.624	1.5215e-10
BMP5	8.93729e-15	0.430605	0.923	0.695	1.58977e-10
CSRP3	3.01929e-14	0.511236	0.949	0.717	5.37071e-10
LRRC16A	3.98756e-14	0.398855	0.684	0.375	7.09308e-10
PTK2B	6.08919e-14	0.450503	0.598	0.292	1.08315e-09
TCEA3	1.32661e-13	0.390042	0.88	0.642	2.35978e-09
SMPX	1.40586e-13	0.383657	0.966	0.807	2.50074e-09
RORA	1.59651e-13	0.353861	0.538	0.248	2.83986e-09
VWDE	3.32441e-13	0.500068	0.855	0.693	5.91346e-09
CKM	3.71012e-13	0.597598	0.949	0.791	6.59955e-09
ADAM11	4.50866e-13	0.284108	0.607	0.29	8.02e-09
MYH7B	4.55113e-13	0.358518	0.752	0.457	8.09555e-09
CADPS2	4.61667e-13	0.320955	0.812	0.478	8.21214e-09
CMYA5	7.65646e-13	0.405618	0.991	0.852	1.36193e-08
RBP1	8.08124e-13	0.314156	0.658	0.358	1.43749e-08
COX6A2	1.08962e-12	0.315563	0.573	0.281	1.93822e-08
RASSF5	1.48979e-12	0.387095	0.761	0.471	2.65005e-08
CITED4	1.55267e-12	0.372346	0.821	0.596	2.76189e-08
XPR1	1.87987e-12	0.376277	0.915	0.74	3.34392e-08
GSTO1	2.03192e-12	0.332421	0.957	0.842	3.61439e-08
SHD	2.32625e-12	0.408096	0.897	0.703	4.13793e-08
SH3KBP1	2.73999e-12	0.383672	0.786	0.552	4.87389e-08
TNFAIP8	5.67216e-12	0.293381	0.718	0.462	1.00896e-07
MT-ATP8	6.87021e-12	0.282086	1	0.999	1.22207e-07
TTN	1.33713e-11	0.447638	1	0.997	2.37849e-07
HSPB3	1.38657e-11	0.349884	0.821	0.563	2.46644e-07
THSD7A	1.61175e-11	0.287101	0.778	0.464	2.86698e-07
ITGB1BP2	1.65261e-11	0.331635	0.786	0.507	2.93966e-07
RBPMS2	1.73667e-11	0.312793	0.974	0.899	3.0892e-07
RABGAP1L	2.07174e-11	0.320126	0.812	0.543	3.68522e-07
GPR37	2.12826e-11	0.359636	0.778	0.486	3.78575e-07
STRN	2.32047e-11	0.297487	0.88	0.703	4.12765e-07
ISL1	2.64856e-11	0.408331	0.863	0.59	4.71126e-07
PABPC4	5.04632e-11	0.27598	0.957	0.882	8.9764e-07
LAMA2	6.70075e-11	0.330651	0.821	0.559	1.19193e-06
GNG11	7.45196e-11	0.301553	0.615	0.317	1.32555e-06
MT-RNR2	8.21202e-11	0.310182	1	1	1.46075e-06
HOMER1	9.18954e-11	0.317142	0.752	0.505	1.63464e-06
RAB9B	1.0061e-10	0.271803	0.521	0.255	1.78966e-06
NELL1	1.09394e-10	0.336973	0.513	0.252	1.94591e-06
ARL5A	1.11868e-10	0.289853	0.94	0.834	1.98991e-06
ADD3	1.91069e-10	0.328947	0.966	0.901	3.39874e-06
GATA6	2.8426e-10	0.319265	0.88	0.692	5.05642e-06
SPEG	5.37335e-10	0.300828	0.872	0.778	9.55812e-06
APOBEC2	7.2648e-10	0.348416	0.838	0.646	1.29226e-05
KIAA1324L	7.87487e-10	0.294715	0.803	0.565	1.40078e-05
CRIP2	9.13926e-10	0.310347	0.94	0.905	1.62569e-05
TESC	9.20361e-10	0.250361	0.735	0.435	1.63714e-05
JMJD1C	9.28412e-10	0.304916	0.966	0.852	1.65146e-05
SH3RF2	1.09634e-09	0.266076	0.607	0.351	1.95018e-05
ZNF521	1.18811e-09	0.265813	0.65	0.433	2.11341e-05
LOC642366	1.81277e-09	0.258925	0.53	0.277	3.22455e-05
A2M	2.06816e-09	0.493394	0.846	0.621	3.67885e-05
NRP1	2.07601e-09	0.3321	0.863	0.733	3.69281e-05
WEE1	2.14017e-09	0.274393	0.897	0.774	3.80694e-05
DIXDC1	2.31214e-09	0.322274	0.855	0.671	4.11283e-05
RASSF8	2.52245e-09	0.29243	0.726	0.522	4.48693e-05
PLEKHA5	2.72387e-09	0.357645	0.821	0.705	4.84523e-05
ACTN2	3.55082e-09	0.288665	0.991	0.889	6.31619e-05
REEP3	4.42115e-09	0.285122	0.906	0.781	7.86434e-05
EPHA7	9.07582e-09	0.278974	0.684	0.459	0.000161441
RCAN2	9.25406e-09	0.35044	0.795	0.575	0.000164611
PPM1K	9.30104e-09	0.302111	0.855	0.746	0.000165447
SEMA3C	1.35259e-08	0.344821	0.709	0.468	0.000240598
GOLIM4	1.70572e-08	0.314457	0.915	0.733	0.000303414
CPEB4	1.94613e-08	0.312628	0.923	0.796	0.000346178
MPP6	2.45728e-08	0.293213	0.718	0.495	0.000437101
CREM	4.92813e-08	0.258669	0.769	0.635	0.000876616
PEA15	5.62679e-08	0.273046	0.932	0.854	0.00100089
SEMA5A	6.6689e-08	0.284096	0.778	0.579	0.00118626
PPARGC1A	6.72542e-08	0.278268	0.829	0.644	0.00119632
SLC25A4	8.94569e-08	0.269378	1	0.918	0.00159126
HCN4	1.06479e-07	0.275697	0.889	0.687	0.00189405
CCDC141	1.23462e-07	0.284602	0.855	0.675	0.00219613
HIST2H2BE	1.24119e-07	0.278842	0.641	0.43	0.00220782
BNIP3	1.61382e-07	0.374154	0.932	0.859	0.00287066
PKIA	1.86412e-07	0.290489	0.906	0.737	0.0033159
GPX3	2.3781e-07	0.2505	0.607	0.405	0.00423016
CDK8	2.98992e-07	0.297652	0.538	0.342	0.00531846
HIPK2	3.22683e-07	0.251363	0.897	0.858	0.00573988
MYL3	4.76218e-07	0.412268	0.769	0.601	0.00847097
MPPED2	4.79484e-07	0.267366	0.718	0.519	0.00852907
MYOM1	6.02172e-07	0.254386	0.991	0.854	0.0107114
RRAD	8.24102e-07	0.258779	0.829	0.594	0.0146591
TXNIP	8.35262e-07	0.261943	0.983	0.94	0.0148576
GATA6-AS1	1.11312e-06	0.299174	0.479	0.295	0.0198002
ZBTB20	2.4977e-06	0.252549	0.59	0.374	0.044429
FRMD4B	5.34743e-06	0.266348	0.812	0.68	0.0951201
HIPK3	9.58445e-06	0.274447	0.838	0.717	0.170488
SLC7A2	2.36227e-05	0.278813	0.744	0.626	0.4202
PHF20L1	2.75902e-05	0.257506	0.821	0.773	0.490775
TNNI3	2.84489e-05	0.322421	0.726	0.607	0.506049
DST	0.000473085	0.255773	0.838	0.822	1
FABP5	0.648586	0.264038	0.538	0.557	1

## Sheet: cluster 6
	p_val	avg_logFC	pct.1	pct.2	p_val_adj
MYH11	1.70082e-116	2.26641	0.987	0.381	3.02542e-112		as shown in Figure 3
SHOX2	2.44986e-110	1.51558	0.942	0.263	4.35782e-106
VSNL1	1.9398e-94	1.21545	0.884	0.246	3.45051e-90
ATP2A2	4.45074e-88	1.21108	1	0.976	7.91697e-84
PRDX1	8.84296e-86	1.30155	1	0.905	1.57299e-81
PAM	4.01259e-83	1.36142	0.991	0.899	7.13759e-79
BMP4	2.67392e-78	1.78775	0.951	0.604	4.75637e-74
ASAH1	3.04792e-76	0.944114	0.982	0.766	5.42163e-72
CXCL12	1.36941e-75	1.17031	0.871	0.29	2.4359e-71
SLIT2	7.62342e-75	1.21751	0.964	0.664	1.35605e-70
POPDC2	9.22239e-69	1.04065	0.991	0.78	1.64048e-64
WLS	3.10377e-67	0.916893	0.991	0.908	5.52099e-63
GSTO1	1.31382e-66	0.834485	0.969	0.824	2.33703e-62
TECRL	1.27291e-64	1.02574	1	0.799	2.26425e-60
ISL1	1.49767e-64	1.03845	0.946	0.534	2.66405e-60
WNT5A	5.84359e-63	1.00322	0.879	0.456	1.03946e-58
TBX5	3.60714e-62	0.849345	0.96	0.502	6.41637e-58
GPR37	7.2851e-62	0.806898	0.893	0.419	1.29587e-57
CADPS2	2.43098e-58	0.722335	0.875	0.42	4.32423e-54
RASSF5	5.2927e-56	0.665766	0.879	0.404	9.41465e-52
FITM1	4.82507e-54	0.653112	0.938	0.434	8.58283e-50
MPP6	7.33857e-54	0.7482	0.839	0.435	1.30538e-49
PLCB1	3.15199e-53	0.790462	0.879	0.541	5.60675e-49
DKK1	1.25926e-50	1.15145	0.741	0.27	2.23997e-46
BTG1	4.29371e-50	0.747244	0.96	0.857	7.63764e-46
RPS6KA2	2.21765e-49	0.71774	0.848	0.483	3.94475e-45
TBX3	2.65857e-49	0.887862	0.674	0.225	4.72906e-45
TNNT2	5.14522e-49	0.647431	1	0.977	9.15231e-45
MYH6	9.30467e-49	0.905735	1	0.815	1.65511e-44
BMP5	5.1157e-48	0.637472	0.938	0.662	9.0998e-44
WIPF3	5.55995e-48	0.625278	0.737	0.331	9.89003e-44
CACNA1D	1.49633e-46	0.503151	0.714	0.242	2.66168e-42
LRRTM3	5.46944e-46	0.54843	0.536	0.121	9.72904e-42
PPP1R1A	1.04639e-45	0.701767	0.951	0.643	1.86132e-41
THSD7A	6.14136e-45	0.617821	0.835	0.41	1.09243e-40
CAPN3	4.94243e-43	0.97989	0.839	0.497	8.7916e-39
NTM	1.36143e-41	0.297975	0.379	0.056	2.42171e-37
RASL10B	3.48034e-41	0.511418	0.844	0.473	6.19083e-37
NPTN	2.61167e-40	0.530645	0.942	0.881	4.64564e-36
SHISA2	5.02847e-39	0.491914	0.692	0.265	8.94464e-35
NR2F2	5.51886e-38	0.630463	0.942	0.624	9.81695e-34
B3GALT2	7.10721e-38	0.32121	0.397	0.071	1.26423e-33
LIMCH1	7.91872e-38	0.546615	0.812	0.405	1.40858e-33
HTRA1	1.08195e-37	0.710927	0.915	0.723	1.92458e-33
KIAA1324L	1.11512e-37	0.529034	0.839	0.526	1.98358e-33
SCP2	2.07847e-36	0.529697	0.897	0.736	3.69718e-32
COL4A6	3.3209e-36	0.581769	0.933	0.738	5.90722e-32
COLQ	7.66178e-36	0.453982	0.679	0.317	1.36288e-31
LSAMP	1.18521e-35	0.563314	0.844	0.496	2.10826e-31
JAG1	6.9266e-35	0.533174	0.844	0.548	1.2321e-30
ADD1	7.94678e-35	0.547246	0.96	0.916	1.41357e-30
TMX4	2.14666e-34	0.595732	0.884	0.662	3.81847e-30
ZNF385B	2.46809e-34	0.525854	0.71	0.306	4.39023e-30
NRXN1	1.19547e-33	0.489709	0.571	0.192	2.12651e-29
PLCL2	1.89255e-33	0.545094	0.728	0.366	3.36647e-29
TMEM87A	4.77837e-33	0.545427	0.902	0.723	8.49976e-29
LOC642366	5.19236e-33	0.43829	0.607	0.226	9.23617e-29
HCN4	7.84378e-33	0.593055	0.897	0.66	1.39525e-28
FRMPD4	1.54341e-32	0.309766	0.406	0.085	2.74542e-28
NBEA	4.63714e-31	0.541309	0.853	0.612	8.24855e-27
BASP1	6.14432e-31	0.552976	0.906	0.602	1.09295e-26
NTRK2	9.65409e-31	0.330098	0.424	0.106	1.71727e-26
HMGB1	1.13851e-30	0.390818	0.996	0.97	2.02517e-26
PRDM6	1.57595e-30	0.448182	0.612	0.248	2.8033e-26
HSPB3	2.89343e-30	0.51567	0.83	0.529	5.14683e-26
PDGFRA	4.18601e-30	0.570462	0.808	0.46	7.44608e-26
TSPAN2	5.24915e-30	0.541578	0.826	0.608	9.33719e-26
PPFIA2	1.24901e-29	0.425028	0.482	0.147	2.22173e-25
CMYA5	3.12743e-29	0.550192	0.96	0.843	5.56308e-25
ETV1	5.40421e-29	0.449677	0.844	0.559	9.61301e-25
MLLT11	1.23767e-28	0.480421	0.929	0.756	2.20157e-24
KCNIP4	1.61032e-28	0.396519	0.679	0.31	2.86444e-24
COL9A1	1.77326e-28	0.308385	0.464	0.14	3.15428e-24
LIX1	6.94768e-28	0.490687	0.634	0.291	1.23585e-23
PLEKHA6	1.96851e-27	0.365347	0.585	0.242	3.50158e-23
MYL4	1.01811e-26	0.499057	1	0.852	1.81102e-22
TRH	2.60784e-26	0.728131	0.71	0.359	4.63883e-22
UBR3	3.27848e-26	0.430029	0.888	0.774	5.83176e-22
GARNL3	5.1655e-26	0.425012	0.661	0.35	9.18839e-22
LRRTM1	7.33932e-26	0.32172	0.482	0.163	1.30552e-21
COL4A5	1.44374e-25	0.406104	0.942	0.898	2.56813e-21
TNFAIP8	5.24452e-25	0.383682	0.737	0.425	9.32894e-21
SFRP1	1.32771e-24	0.459716	0.933	0.749	2.36174e-20
FEZ1	2.10671e-24	0.413699	0.732	0.471	3.74741e-20
S1PR3	5.43183e-24	0.361784	0.536	0.215	9.66214e-20
MYL7	1.12733e-23	0.508157	1	0.993	2.00529e-19
CLGN	2.33178e-23	0.419341	0.719	0.437	4.14777e-19
SYNPO2	2.37833e-23	0.396443	0.728	0.413	4.23057e-19
MYL9	2.92279e-23	0.374507	0.996	0.998	5.19906e-19
RNF150	3.04906e-23	0.368111	0.768	0.52	5.42366e-19
FBXO32	4.89903e-23	0.416614	0.75	0.467	8.71439e-19
RRAD	4.93492e-23	0.569771	0.835	0.563	8.77823e-19
FBXO9	6.34957e-23	0.384997	0.911	0.823	1.12946e-18
PLCL1	7.441e-23	0.266427	0.473	0.173	1.32361e-18
FAM19A4	7.47961e-23	0.290157	0.375	0.111	1.33047e-18
MYOM1	1.11341e-22	0.399429	0.969	0.843	1.98053e-18
NES	1.47096e-22	0.516902	0.924	0.871	2.61655e-18
FRMD4B	1.93985e-22	0.428562	0.839	0.657	3.4506e-18
PRKG1	2.57272e-22	0.344508	0.607	0.314	4.57636e-18
ATP1B2	6.11554e-22	0.344049	0.978	0.952	1.08783e-17
NDUFA11	8.1172e-22	0.385553	0.942	0.827	1.44389e-17
CD47	1.05534e-21	0.417937	0.777	0.563	1.87723e-17
MGAT5	1.39187e-21	0.510813	0.768	0.552	2.47586e-17
FZD7	1.64861e-21	0.420144	0.719	0.46	2.93255e-17
ELL2	2.32533e-21	0.444297	0.75	0.527	4.1363e-17
VWDE	5.83689e-21	0.393842	0.888	0.664	1.03827e-16
GNAO1	6.03675e-21	0.275244	0.406	0.134	1.07382e-16
AR	6.22442e-21	0.289817	0.312	0.084	1.1072e-16
GATA6	8.99827e-21	0.404877	0.844	0.678	1.60061e-16
ECHDC2	1.02862e-20	0.34691	0.696	0.416	1.82971e-16
PTK2B	1.2484e-20	0.323666	0.567	0.262	2.22066e-16
TMBIM6	2.19434e-20	0.313199	0.991	0.987	3.9033e-16
NELL1	2.45892e-20	0.326391	0.513	0.219	4.37394e-16
RGS6	4.15148e-20	0.292427	0.496	0.21	7.38465e-16
GULP1	4.86559e-20	0.325506	0.732	0.459	8.6549e-16
SPHKAP	6.486e-20	0.460894	0.915	0.694	1.15373e-15
ADAM11	9.39743e-20	0.309445	0.554	0.264	1.67162e-15
BCAR3	1.07776e-19	0.27995	0.482	0.2	1.91713e-15
DENND1B	1.16946e-19	0.348836	0.71	0.464	2.08023e-15
PMP22	1.9577e-19	0.484611	0.634	0.368	3.48236e-15
HCN1	2.08898e-19	0.314036	0.589	0.29	3.71588e-15
CIRBP	2.76812e-19	0.301653	0.991	0.981	4.92393e-15
SLC30A3	3.47027e-19	0.410853	0.688	0.431	6.17292e-15
APP	4.56363e-19	0.361497	0.951	0.893	8.11778e-15
CCDC141	5.33549e-19	0.384864	0.835	0.658	9.49077e-15
SHD	5.57484e-19	0.436094	0.875	0.685	9.91653e-15
NRTN	7.37939e-19	0.347891	0.714	0.51	1.31265e-14
FGD6	1.02969e-18	0.400683	0.772	0.602	1.83162e-14
ESRRG	1.43176e-18	0.451234	0.728	0.533	2.54681e-14
C7	2.85082e-18	0.364957	0.379	0.137	5.07104e-14
PIP4K2A	3.11437e-18	0.401893	0.754	0.538	5.53985e-14
CD59	6.13112e-18	0.346175	0.871	0.841	1.0906e-13
C1orf105	1.18034e-17	0.322498	0.562	0.286	2.09959e-13
KANK1	1.64981e-17	0.385102	0.804	0.622	2.93469e-13
LDHB	3.3671e-17	0.29572	1	0.993	5.98939e-13
ITGB5	3.46189e-17	0.39206	0.812	0.636	6.158e-13
CPE	3.76074e-17	0.371519	0.853	0.759	6.6896e-13
LINC00648	4.83096e-17	0.287196	0.513	0.26	8.59331e-13
ARL5A	5.16081e-17	0.329766	0.893	0.834	9.18005e-13
SLC7A2	1.2621e-16	0.355594	0.786	0.601	2.24502e-12
CNNM1	1.46088e-16	0.262515	0.42	0.18	2.59862e-12
TRDN	1.68927e-16	0.341824	0.955	0.776	3.00487e-12
CRIP2	1.72191e-16	0.304355	0.991	0.887	3.06294e-12
BMP7	4.45358e-16	0.405307	0.714	0.498	7.92202e-12
STRN	6.69181e-16	0.330877	0.835	0.693	1.19034e-11
SH3GLB1	8.21249e-16	0.30463	0.924	0.891	1.46084e-11
FGFR2	9.42868e-16	0.337581	0.746	0.553	1.67717e-11
HAND2	1.79159e-15	0.321602	0.964	0.831	3.18687e-11
ZDHHC2	2.04604e-15	0.286269	0.768	0.568	3.6395e-11
ERCC-00074	2.24994e-15	0.285723	1	1	4.00219e-11
SEMA5A	4.25192e-15	0.280279	0.777	0.554	7.56331e-11
CPVL	5.44581e-15	0.291952	0.763	0.534	9.68701e-11
PLCB4	5.71659e-15	0.344449	0.719	0.526	1.01687e-10
RGS4	1.0981e-14	0.424208	0.46	0.228	1.9533e-10
KIF13A	1.38656e-14	0.305136	0.83	0.723	2.46641e-10
SPOCK1	2.6046e-14	0.252599	0.388	0.163	4.63306e-10
ITM2C	2.62553e-14	0.260833	0.987	0.938	4.67029e-10
EPB41L3	2.79367e-14	0.291529	0.879	0.754	4.96937e-10
SMPX	3.19365e-14	0.353377	0.969	0.787	5.68086e-10
UNC45B	3.56562e-14	0.302237	0.924	0.763	6.34252e-10
DANCR	3.65447e-14	0.306656	0.826	0.704	6.50057e-10
CLIC4	5.77797e-14	0.250487	0.906	0.846	1.02778e-09
CDK8	6.84782e-14	0.390063	0.531	0.319	1.21809e-09
MEF2C	7.01607e-14	0.341568	0.817	0.683	1.24802e-09
ERCC-00171	7.2916e-14	0.26529	1	0.999	1.29703e-09
BAZ2B	8.55563e-14	0.373546	0.812	0.739	1.52187e-09
ANOS1	1.00508e-13	0.272922	0.353	0.15	1.78783e-09
SLC8A1	1.14624e-13	0.2915	0.978	0.915	2.03893e-09
ERCC-00004	1.56481e-13	0.265449	1	1	2.78348e-09
ERCC-00130	2.0127e-13	0.268789	1	1	3.58019e-09
ADPRHL1	2.63833e-13	0.297744	0.897	0.731	4.69306e-09
SGPP2	2.65048e-13	0.332822	0.536	0.312	4.71467e-09
TTN	2.73795e-13	0.396979	1	0.997	4.87026e-09
PLPP3	4.34294e-13	0.445072	0.496	0.286	7.72523e-09
MITF	6.3467e-13	0.282976	0.875	0.74	1.12895e-08
FNIP2	7.72577e-13	0.297388	0.728	0.548	1.37426e-08
ERCC-00096	8.78032e-13	0.257765	1	1	1.56184e-08
NFIB	1.17077e-12	0.256288	0.804	0.598	2.08257e-08
ASPH	1.33505e-12	0.259267	0.929	0.874	2.37479e-08
RBM24	1.67262e-12	0.2846	0.929	0.836	2.97526e-08
HS2ST1	2.74774e-12	0.280681	0.808	0.686	4.88767e-08
DIXDC1	2.97283e-12	0.310133	0.777	0.668	5.28807e-08
ERCC-00113	3.112e-12	0.273413	1	0.999	5.53563e-08
NCAM1	3.11579e-12	0.263662	0.964	0.871	5.54236e-08
HRASLS	3.13193e-12	0.252595	0.487	0.275	5.57107e-08
HIST2H2BE	4.10628e-12	0.254024	0.616	0.41	7.30425e-08
LAMA2	4.51694e-12	0.276012	0.759	0.542	8.03474e-08
SPEG	4.70559e-12	0.267868	0.857	0.771	8.3703e-08
LHFP	5.10102e-12	0.272991	0.795	0.646	9.0737e-08
AFF3	8.39395e-12	0.300756	0.482	0.284	1.49312e-07
GATA6-AS1	8.66388e-12	0.320666	0.464	0.276	1.54113e-07
PCDH9	1.11704e-11	0.267483	0.473	0.265	1.987e-07
CTSV	1.35248e-11	0.369803	0.46	0.263	2.40579e-07
TMEM47	1.79732e-11	0.357329	0.732	0.577	3.19708e-07
ACOT13	2.89148e-11	0.277566	0.875	0.815	5.14337e-07
ERCC-00046	2.89372e-11	0.256726	1	1	5.14736e-07
ALDH1A1	2.92385e-11	0.401641	0.317	0.137	5.20094e-07
ERCC-00136	4.10958e-11	0.265105	0.964	0.943	7.31013e-07
MLF1	4.44856e-11	0.27299	0.719	0.583	7.9131e-07
ANAPC16	7.3824e-11	0.257156	0.875	0.845	1.31318e-06
TIMP3	8.42096e-11	0.292844	0.884	0.759	1.49792e-06
TDP2	1.07665e-10	0.257527	0.781	0.666	1.91515e-06
NPTN-IT1	2.35645e-10	0.378975	0.473	0.292	4.19166e-06
TRPM7	2.57341e-10	0.273403	0.714	0.62	4.57759e-06
HAND2-AS1	3.74459e-10	0.252753	0.478	0.274	6.66088e-06
SSPN	4.10517e-10	0.263914	0.571	0.382	7.30227e-06
RYR2	5.25564e-10	0.252054	0.938	0.844	9.34873e-06
CTBP2	8.03847e-10	0.292533	0.768	0.721	1.42988e-05
EPHA7	8.94441e-10	0.308293	0.625	0.446	1.59103e-05
ZNF91	1.31523e-09	0.269478	0.772	0.723	2.33953e-05
ADAMTS1	2.94896e-09	0.319541	0.473	0.304	5.24561e-05
RNF8	4.10292e-09	0.287046	0.625	0.491	7.29827e-05
COX20	6.15826e-09	0.295679	0.621	0.466	0.000109543
SREBF2	9.2857e-09	0.327874	0.75	0.641	0.000165174
BEX3	4.2448e-08	0.347034	0.656	0.522	0.000755065
CCDC50	6.31241e-08	0.263575	0.821	0.779	0.00112285
ATP1A2	2.10353e-07	0.290651	0.625	0.491	0.00374176
SOBP	4.33873e-07	0.251309	0.612	0.499	0.00771773
SRGAP2B	4.74673e-07	0.305614	0.487	0.359	0.00844349
DPF3	5.14293e-07	0.25887	0.446	0.317	0.00914824
HIPK3	1.12651e-06	0.27069	0.799	0.712	0.0200384
ALDH3A2	1.61241e-06	0.254637	0.781	0.707	0.0286816
LINC00998	9.06914e-06	0.253159	0.504	0.392	0.161322
BCL6	2.69812e-05	0.262283	0.491	0.374	0.479942

## Sheet: cluster 7
	p_val	avg_logFC	pct.1	pct.2	p_val_adj
WISP1	7.63239e-53	0.708543	0.478	0.046	1.35765e-48		as shown in Figure 3
CCDC3	9.73796e-46	1.10596	0.591	0.118	1.73219e-41
ITGA1	4.4996e-45	0.805132	0.791	0.218	8.00388e-41
COL3A1	8.3874e-45	1.76921	0.965	0.597	1.49195e-40
SLN	5.20125e-44	1.09067	0.426	0.048	9.25198e-40
COL1A2	2.36704e-42	1.79479	0.965	0.68	4.21049e-38
TCF21	5.15576e-42	0.780216	0.348	0.029	9.17107e-38
DSC3	3.94212e-39	0.714076	0.687	0.177	7.01225e-35
CTHRC1	3.91039e-38	0.525317	0.522	0.094	6.9558e-34
COL6A3	6.40551e-38	1.04637	0.435	0.065	1.13941e-33
IL33	2.69409e-37	0.335873	0.2	0.004	4.79226e-33
SFRP5	3.69421e-36	0.975589	0.652	0.166	6.57126e-32
SPARC	1.84174e-35	1.17891	1	0.889	3.27609e-31
ETS1	2.07671e-35	0.598362	0.504	0.097	3.69406e-31
PDLIM3	5.81796e-35	1.58849	0.939	0.611	1.0349e-30
HEYL	9.21416e-34	0.421144	0.357	0.043	1.63901e-29
COL14A1	2.34726e-33	0.456172	0.4	0.059	4.1753e-29
TMSB4X	8.62331e-33	1.17789	0.965	0.713	1.53391e-28
TBX18	4.61674e-32	0.852414	0.809	0.278	8.21226e-28
GATM	1.01347e-31	1.30844	0.878	0.53	1.80277e-27
GNG2	1.03416e-30	0.448646	0.391	0.063	1.83956e-26
PAPPA	3.32842e-29	0.346558	0.461	0.089	5.92059e-25
FBLN2	3.60509e-28	0.691193	0.678	0.256	6.41273e-24
TNC	5.02686e-28	1.27929	0.539	0.147	8.94178e-24
LRRC17	1.23071e-27	0.463259	0.504	0.128	2.18918e-23
PDGFRB	3.93336e-27	0.419816	0.461	0.101	6.99666e-23
ACTB	4.21941e-27	0.848075	1	0.98	7.50549e-23
CDH11	6.34832e-27	0.751219	0.817	0.428	1.12924e-22
TUBA1A	2.11413e-26	0.877121	0.983	0.867	3.76062e-22
FXYD5	3.39622e-26	0.296281	0.487	0.118	6.04119e-22
PCDH18	5.2472e-26	0.511158	0.443	0.099	9.33372e-22
LHFP	2.17505e-25	0.628394	0.939	0.646	3.86899e-21
ACTA2	4.56501e-25	1.16207	0.878	0.577	8.12025e-21
ISLR	4.59019e-25	0.29896	0.261	0.031	8.16503e-21
IGFBP2	5.86982e-25	0.703777	0.791	0.415	1.04412e-20
FAM129A	4.96299e-24	0.258547	0.261	0.033	8.82816e-20
STMN2	5.05868e-24	0.423756	0.13	0.003	8.99839e-20
KCNA5	7.03521e-24	0.519508	0.522	0.148	1.25142e-19
DHRS9	9.60616e-24	1.14375	0.504	0.155	1.70874e-19
COL5A1	1.11005e-23	0.641119	0.843	0.512	1.97456e-19
CD200	1.21988e-23	0.37894	0.661	0.23	2.16992e-19
TMSB10	2.33798e-23	0.800951	0.991	0.951	4.1588e-19
FLNA	6.4126e-23	0.789087	0.913	0.718	1.14067e-18
FBN1	9.2706e-23	0.762218	0.565	0.199	1.64905e-18
NFIB	1.15402e-22	0.585956	0.904	0.61	2.05277e-18
ROBO2	1.29078e-22	0.350869	0.435	0.106	2.29603e-18
TIMP1	1.39145e-22	0.624695	0.974	0.819	2.47511e-18
EHD2	1.41289e-22	0.507194	0.557	0.197	2.51324e-18
SYNPO	1.43431e-22	0.732054	0.617	0.254	2.55134e-18
NCCRP1	2.24258e-22	0.749807	0.591	0.214	3.98911e-18
MICAL2	2.85132e-22	0.707836	0.957	0.72	5.07192e-18
PLXND1	3.15828e-22	0.431166	0.591	0.207	5.61795e-18
COL6A2	5.44768e-22	0.700273	0.861	0.546	9.69034e-18
COL5A2	1.02502e-21	0.450009	0.852	0.488	1.82331e-17
PELO	1.9096e-21	0.697148	0.835	0.509	3.3968e-17
TRAF5	4.53173e-21	0.369555	0.522	0.164	8.06104e-17
ANXA1	5.08245e-21	0.695821	0.496	0.158	9.04067e-17
SEZ6L2	5.18677e-21	0.370204	0.496	0.151	9.22622e-17
ARL4D	7.03738e-21	0.514398	0.652	0.26	1.25181e-16
SERPINE2	7.11671e-21	0.654955	0.609	0.23	1.26592e-16
DSEL	9.57721e-21	0.413231	0.574	0.201	1.70359e-16
COL4A2	1.44229e-20	0.564152	0.991	0.97	2.56554e-16
GLIPR2	2.33973e-20	0.348253	0.452	0.135	4.16192e-16
S100A10	4.58776e-20	0.480589	0.861	0.548	8.16071e-16
S100A11	5.22106e-20	0.814602	0.817	0.503	9.28722e-16
COL16A1	6.51955e-20	0.391342	0.522	0.186	1.1597e-15
MMP2	6.52414e-20	0.541043	0.487	0.158	1.16051e-15
COL1A1	6.91953e-20	1.72457	0.948	0.854	1.23085e-15
FTL	1.54853e-19	0.57324	1	0.968	2.75453e-15
SSC5D	1.72127e-19	0.273247	0.252	0.04	3.0618e-15
RFTN1	1.98702e-19	0.575296	0.748	0.398	3.53452e-15
TPM4	2.09831e-19	0.717839	0.965	0.837	3.73247e-15
COL4A1	2.38761e-19	0.722213	0.974	0.862	4.24708e-15
ANXA5	3.69556e-19	0.549047	0.948	0.837	6.57366e-15
FSTL1	3.70852e-19	0.523356	0.991	0.947	6.59671e-15
MFAP2	4.56161e-19	0.758122	0.791	0.524	8.11419e-15
CALD1	7.34044e-19	0.67963	0.974	0.896	1.30572e-14
EFNA5	7.90454e-19	0.564758	0.852	0.543	1.40606e-14
LRRC32	1.12914e-18	0.452773	0.487	0.173	2.00852e-14
SULF1	2.09946e-18	0.943918	0.504	0.181	3.73452e-14
MYH10	3.10285e-18	0.592746	0.983	0.904	5.51935e-14
PDE3A	3.82049e-18	0.390444	0.722	0.363	6.79589e-14
C4orf48	6.21015e-18	0.48635	0.852	0.59	1.10466e-13
EMILIN1	7.70631e-18	0.32895	0.426	0.129	1.3708e-13
MAB21L2	1.12262e-17	0.341638	0.574	0.213	1.99693e-13
ECE1	1.62718e-17	0.46742	0.722	0.387	2.89444e-13
ZNF385B	1.92163e-17	0.443237	0.73	0.349	3.41819e-13
MARCKS	2.0041e-17	0.893898	0.896	0.651	3.56489e-13
FZD1	2.19087e-17	0.503824	0.791	0.451	3.89712e-13
ACTG1	3.34511e-17	0.71826	1	0.979	5.95028e-13
TUBB	4.35526e-17	0.507171	1	0.986	7.74714e-13
SFRP1	7.32789e-17	0.787788	0.939	0.769	1.30348e-12
GUCY1A3	9.50655e-17	0.749553	0.87	0.652	1.69103e-12
THY1	1.07229e-16	0.251198	0.287	0.061	1.90739e-12
ANGPTL2	1.09579e-16	0.263821	0.278	0.06	1.94919e-12
BEX1	1.22847e-16	0.705051	0.948	0.808	2.18521e-12
PHLDA1	2.5391e-16	0.503635	0.739	0.371	4.51656e-12
NFIA	2.62216e-16	0.608426	0.791	0.455	4.66429e-12
MAP2	4.07461e-16	0.291121	0.322	0.081	7.24792e-12
TPM2	4.90026e-16	0.604201	0.965	0.914	8.71658e-12
MAGI2-AS3	5.08677e-16	0.536985	0.957	0.847	9.04835e-12
LIPA	5.74352e-16	0.29824	0.478	0.176	1.02166e-11
SEMA6A	5.99757e-16	0.608124	0.748	0.438	1.06685e-11
HEY1	6.24407e-16	0.387289	0.435	0.148	1.11069e-11
SNAI2	6.27192e-16	0.328185	0.487	0.177	1.11565e-11
TUBA1B	6.42575e-16	0.431214	1	0.979	1.14301e-11
EDIL3	9.86109e-16	0.341464	0.4	0.124	1.75409e-11
FN1	1.19845e-15	1.17767	0.896	0.679	2.13181e-11
TAGLN	1.80264e-15	1.06991	0.852	0.682	3.20654e-11
TRPS1	2.52156e-15	0.332672	0.652	0.299	4.48536e-11
CLIC4	3.22906e-15	0.525946	0.913	0.852	5.74386e-11
SOX4	6.03953e-15	0.648523	0.983	0.954	1.07431e-10
LTBP4	9.72936e-15	0.600434	0.713	0.454	1.73066e-10
ELK3	1.00156e-14	0.266324	0.461	0.162	1.78157e-10
GAP43	1.10171e-14	0.258649	0.296	0.072	1.95972e-10
SNAP25	1.14179e-14	0.421454	0.557	0.245	2.03102e-10
FLRT2	1.21779e-14	0.550815	0.878	0.713	2.16621e-10
PPFIA2	1.23717e-14	0.356478	0.496	0.183	2.20067e-10
F2R	1.5553e-14	0.409548	0.635	0.332	2.76656e-10
ENAH	1.55625e-14	0.401859	0.983	0.963	2.76826e-10
VCAN	1.55644e-14	0.679071	0.983	0.886	2.7686e-10
SULF2	1.55744e-14	0.444775	0.391	0.126	2.77038e-10
EIF4G2	1.60105e-14	0.282853	1	0.999	2.84794e-10
ACTG2	1.6184e-14	0.86592	0.2	0.034	2.87881e-10
HMGA2	2.21641e-14	0.651467	0.87	0.704	3.94256e-10
CAP1	2.25034e-14	0.378548	0.922	0.783	4.0029e-10
FMOD	2.29477e-14	0.269824	0.261	0.06	4.08194e-10
NOTCH3	2.40664e-14	0.407654	0.704	0.404	4.28093e-10
PPIA	3.0115e-14	0.276798	1	0.998	5.35685e-10
SPON1	3.24895e-14	0.441699	0.635	0.31	5.77924e-10
VIM	4.6765e-14	0.89921	0.965	0.879	8.31855e-10
FOXC1	4.75746e-14	0.408044	0.487	0.191	8.46257e-10
TXNDC17	5.49965e-14	0.432061	0.739	0.44	9.78278e-10
TSPAN5	5.70513e-14	0.301714	0.583	0.282	1.01483e-09
ZNF83	1.02329e-13	0.417994	0.948	0.857	1.82022e-09
VASH1	1.1507e-13	0.39881	0.696	0.413	2.04687e-09
SOX9	1.16351e-13	0.513087	0.278	0.072	2.06964e-09
APP	1.35083e-13	0.420138	0.991	0.895	2.40286e-09
EFS	1.57001e-13	0.451613	0.661	0.361	2.79273e-09
YWHAB	2.32563e-13	0.284939	0.983	0.97	4.13682e-09
GUCY1B3	2.38676e-13	0.313477	0.435	0.168	4.24556e-09
RPS6	2.42774e-13	0.350718	1	0.997	4.31846e-09
EFNB1	2.93896e-13	0.383266	0.539	0.257	5.22782e-09
LSAMP	3.67623e-13	0.392565	0.835	0.536	6.53928e-09
SEMA3D	3.743e-13	0.327769	0.478	0.194	6.65805e-09
COL6A1	3.91586e-13	0.48908	0.948	0.908	6.96553e-09
MAGED2	4.39098e-13	0.471869	0.983	0.944	7.81067e-09
MAP1LC3A	4.61113e-13	0.518146	0.713	0.492	8.20228e-09
IFITM3	6.79552e-13	0.500264	0.983	0.923	1.20879e-08
MIR100HG	7.4929e-13	0.305028	0.774	0.473	1.33284e-08
WSB1	8.43035e-13	0.405815	1	0.961	1.49959e-08
LOX	1.10406e-12	0.406825	0.322	0.099	1.96391e-08
GUCY1A2	1.37117e-12	0.415028	0.391	0.135	2.43904e-08
CREB3L1	1.47855e-12	0.339252	0.504	0.233	2.63004e-08
BCAT1	1.59459e-12	0.406466	0.748	0.473	2.83646e-08
EMP3	1.68245e-12	0.32018	0.687	0.419	2.99274e-08
CXCL12	2.12558e-12	0.669725	0.678	0.378	3.78098e-08
C7	2.22036e-12	1.01704	0.409	0.161	3.94958e-08
TNS1	2.31387e-12	0.389666	0.713	0.446	4.11591e-08
ATP2B4	2.36041e-12	0.415279	0.904	0.847	4.19869e-08
CNN3	2.42016e-12	0.42788	0.73	0.513	4.30498e-08
ZNF503	2.45208e-12	0.432173	0.713	0.421	4.36176e-08
SGK1	2.91177e-12	0.471695	0.443	0.186	5.17946e-08
MYO1D	3.19478e-12	0.306514	0.583	0.279	5.68288e-08
MFAP4	3.21409e-12	0.969716	0.609	0.366	5.71722e-08
MARCKSL1	3.48375e-12	0.394601	0.965	0.942	6.1969e-08
ANKRD50	3.69991e-12	0.498281	0.765	0.593	6.5814e-08
TUBB3	3.8768e-12	0.309198	0.417	0.17	6.89605e-08
PLAT	4.34183e-12	0.275569	0.278	0.077	7.72324e-08
NRARP	5.61851e-12	0.305602	0.296	0.091	9.99421e-08
STMN1	7.82489e-12	0.338971	0.974	0.969	1.39189e-07
ZFP36L1	7.96827e-12	0.396836	1	0.98	1.4174e-07
DACT1	8.01486e-12	0.308437	0.452	0.196	1.42568e-07
ALDH1A1	1.06656e-11	0.976961	0.383	0.15	1.8972e-07
LIMA1	1.08353e-11	0.395288	0.47	0.209	1.92739e-07
PENK	1.3397e-11	0.569973	0.139	0.021	2.38306e-07
CFL1	1.54564e-11	0.263393	1	0.999	2.74939e-07
FTH1	1.79117e-11	0.296763	1	0.993	3.18613e-07
FNBP1L	2.12134e-11	0.301117	0.661	0.383	3.77343e-07
RGS2	2.2801e-11	0.635423	0.391	0.163	4.05584e-07
EPS8	2.39729e-11	0.392653	0.617	0.361	4.2643e-07
COBLL1	2.53808e-11	0.403793	0.652	0.379	4.51474e-07
SLC22A17	2.60591e-11	0.387086	0.878	0.651	4.63539e-07
KLF6	2.69052e-11	0.764766	0.765	0.53	4.7859e-07
SH3BGRL	2.7572e-11	0.348064	0.896	0.753	4.90451e-07
LAMC1	2.91371e-11	0.453672	0.983	0.928	5.18291e-07
ARPC2	3.14618e-11	0.320148	0.991	0.969	5.59642e-07
KCNJ3	3.88656e-11	0.346607	0.478	0.219	6.91342e-07
SERPINB9	4.07084e-11	0.281063	0.591	0.299	7.24121e-07
PRR16	4.7034e-11	0.377494	0.426	0.183	8.36642e-07
GALNT10	4.83171e-11	0.260176	0.496	0.239	8.59465e-07
DAP	4.88231e-11	0.30706	0.809	0.661	8.68465e-07
CDK4	4.98121e-11	0.318343	0.87	0.67	8.86058e-07
DPP7	5.62001e-11	0.363866	0.809	0.644	9.99687e-07
AKAP12	5.70685e-11	0.620607	0.783	0.652	1.01514e-06
GDF10	5.83812e-11	0.285012	0.296	0.096	1.03849e-06
OLFML2A	6.23155e-11	0.483098	0.687	0.469	1.10847e-06
ZEB2	6.55018e-11	0.338434	0.687	0.417	1.16515e-06
SHISA5	6.90931e-11	0.269568	0.861	0.651	1.22903e-06
SH3BGRL3	7.98575e-11	0.478552	0.826	0.644	1.42051e-06
SLC16A12	8.28122e-11	0.266125	0.574	0.291	1.47306e-06
FAM171A1	8.63068e-11	0.364381	0.826	0.642	1.53522e-06
IQGAP1	8.76121e-11	0.372093	0.661	0.414	1.55844e-06
PRDX6	8.81631e-11	0.418476	0.974	0.958	1.56825e-06
RBP1	9.9165e-11	0.255045	0.652	0.36	1.76395e-06
PLTP	1.09249e-10	0.334364	0.73	0.465	1.94333e-06
BMP1	1.11382e-10	0.334793	0.539	0.285	1.98127e-06
MRC2	1.19173e-10	0.372989	0.843	0.596	2.11985e-06
CSRP2	1.39405e-10	0.494169	0.896	0.755	2.47974e-06
PTN	1.89588e-10	0.528439	0.774	0.59	3.37239e-06
GABARAP	1.92729e-10	0.258675	1	0.991	3.42827e-06
LITAF	1.96184e-10	0.455201	0.791	0.539	3.48972e-06
ADAM9	1.99637e-10	0.330731	0.791	0.548	3.55115e-06
FHL1	2.59179e-10	0.434318	0.861	0.718	4.61027e-06
GALNT2	2.625e-10	0.361612	0.8	0.613	4.66935e-06
RBM3	2.79282e-10	0.388211	0.843	0.699	4.96787e-06
KCTD12	2.8567e-10	0.893539	0.704	0.568	5.0815e-06
JUP	3.02144e-10	0.274037	0.948	0.87	5.37454e-06
KLF13	3.36044e-10	0.266049	0.722	0.496	5.97755e-06
MAP4K4	3.65264e-10	0.345828	0.93	0.849	6.49731e-06
P4HB	4.08147e-10	0.30499	0.93	0.834	7.26012e-06
RPL37	4.17898e-10	0.379572	1	0.997	7.43358e-06
FBXO32	4.30709e-10	0.438864	0.774	0.496	7.66146e-06
GNAI2	4.34069e-10	0.335738	0.922	0.832	7.72122e-06
HTRA1	4.87728e-10	0.38965	0.922	0.744	8.6757e-06
TPT1	5.58276e-10	0.255884	1	0.999	9.93061e-06
ARPC5	5.98445e-10	0.381813	0.904	0.776	1.06451e-05
PTMS	6.46705e-10	0.298598	0.948	0.946	1.15036e-05
S100A6	6.82253e-10	0.263057	0.565	0.316	1.21359e-05
NFATC4	7.20667e-10	0.272741	0.609	0.363	1.28192e-05
TLN1	8.03645e-10	0.316081	0.904	0.855	1.42952e-05
SERPINH1	8.82753e-10	0.355976	0.957	0.869	1.57024e-05
RCSD1	9.47668e-10	0.375689	0.757	0.587	1.68571e-05
BASP1	9.52434e-10	0.280931	0.913	0.635	1.69419e-05
FYN	1.07694e-09	0.310246	0.817	0.6	1.91566e-05
SHC1	1.19797e-09	0.304253	0.739	0.501	2.13094e-05
RPL6	1.2085e-09	0.254902	1	0.997	2.14969e-05
COL4A5	1.3233e-09	0.380695	0.948	0.902	2.35389e-05
IGFBP3	1.33523e-09	0.319813	0.365	0.147	2.37511e-05
ACTN1	1.33606e-09	0.456555	0.896	0.777	2.37659e-05
ZNF385A	1.39194e-09	0.251652	0.609	0.37	2.47598e-05
TMEM185A	1.41576e-09	0.364079	0.809	0.643	2.51836e-05
MYRF	1.60459e-09	0.327392	0.861	0.711	2.85424e-05
KLHDC8B	1.62696e-09	0.296046	0.783	0.588	2.89404e-05
RPS12	1.74265e-09	0.300168	1	0.995	3.09982e-05
OST4	1.7445e-09	0.278836	0.965	0.917	3.10312e-05
PRAF2	1.82876e-09	0.283608	0.835	0.633	3.253e-05
TGFBI	1.97267e-09	0.491053	0.235	0.072	3.50899e-05
TCEAL9	2.05049e-09	0.342993	0.661	0.406	3.64742e-05
DYNC1LI2	2.15497e-09	0.292571	0.852	0.76	3.83326e-05
TCEAL7	2.23964e-09	0.277656	0.435	0.207	3.98387e-05
ENC1	2.32564e-09	0.474342	0.339	0.138	4.13684e-05
CRABP2	3.1875e-09	0.384277	0.548	0.326	5.66993e-05
MDK	3.2908e-09	0.28727	1	0.997	5.85368e-05
CTNNA1	3.55324e-09	0.259496	0.948	0.888	6.32051e-05
ANTXR1	3.79661e-09	0.264061	0.765	0.563	6.75341e-05
PTMA	4.98977e-09	0.279494	0.991	0.978	8.8758e-05
LAPTM4A	5.07211e-09	0.296284	0.939	0.897	9.02227e-05
RPL10A	5.32739e-09	0.251533	1	0.997	9.47636e-05
ARHGEF40	5.56576e-09	0.385029	0.643	0.464	9.90037e-05
SAT1	6.25224e-09	0.395608	0.609	0.404	0.000111215
CMTM3	6.45863e-09	0.30313	0.791	0.632	0.000114886
IGFBP5	7.1853e-09	0.437385	0.817	0.62	0.000127812
SMTNL2	7.21185e-09	0.302822	0.696	0.49	0.000128284
COL4A6	7.32335e-09	0.448094	0.896	0.764	0.000130268
NCAM1	7.77474e-09	0.368045	0.957	0.882	0.000138297
FAM114A1	7.90791e-09	0.295823	0.609	0.398	0.000140666
TPM3	8.11974e-09	0.323109	0.826	0.63	0.000144434
TCF4	8.22965e-09	0.263713	0.826	0.654	0.000146389
NYNRIN	8.40598e-09	0.256873	0.774	0.566	0.000149526
PGRMC1	8.80186e-09	0.258396	0.904	0.819	0.000156568
EFNB2	1.11201e-08	0.352429	0.835	0.601	0.000197804
CNN1	1.14028e-08	0.505603	0.774	0.588	0.000202832
SPOCK1	1.14442e-08	0.279427	0.4	0.187	0.000203569
RPL28	1.20083e-08	0.303314	0.991	0.98	0.000213603
RPL37A	1.25659e-08	0.33445	1	0.997	0.000223523
PXDN	1.33616e-08	0.348426	0.896	0.844	0.000237676
RABL6	1.37688e-08	0.268998	0.887	0.764	0.00024492
RPL10	1.48058e-08	0.254358	1	0.999	0.000263366
NID1	1.55056e-08	0.32898	0.739	0.556	0.000275813
PLOD2	1.55547e-08	0.319808	0.843	0.692	0.000276686
EZR	1.70838e-08	0.453541	0.913	0.836	0.000303887
ROGDI	1.94852e-08	0.278943	0.617	0.387	0.000346603
RASD1	2.36716e-08	0.339508	0.409	0.193	0.00042107
PSD3	2.36821e-08	0.32293	0.87	0.711	0.000421257
AXL	2.38325e-08	0.352374	0.8	0.681	0.000423933
DYNC1I2	2.69019e-08	0.298317	0.913	0.847	0.00047853
PNMA1	3.25152e-08	0.256241	0.835	0.633	0.000578381
LASP1	3.25505e-08	0.25509	0.696	0.489	0.000579008
CHSY1	3.92135e-08	0.300468	0.826	0.618	0.00069753
STAT6	3.93017e-08	0.286631	0.704	0.491	0.000699099
CLTA	4.55333e-08	0.277468	0.765	0.62	0.000809946
PDLIM7	7.3761e-08	0.337493	0.887	0.794	0.00131206
MLLT11	8.39868e-08	0.26078	0.896	0.779	0.00149396
CDC42EP3	8.53157e-08	0.401469	0.896	0.827	0.0015176
DGKI	1.0808e-07	0.25091	0.487	0.273	0.00192252
CAMK2N1	1.0833e-07	0.322502	0.287	0.114	0.00192697
PFN1	1.0888e-07	0.279964	1	0.99	0.00193677
SLC26A2	1.09842e-07	0.299347	0.643	0.463	0.00195386
MYH9	1.12508e-07	0.3879	0.878	0.808	0.00200129
ISYNA1	1.22264e-07	0.313177	0.913	0.872	0.00217483
ZDHHC8P1	1.24886e-07	0.256795	0.287	0.121	0.00222147
PLK2	1.35227e-07	0.438863	0.33	0.149	0.00240541
LGALS3BP	1.69303e-07	0.298889	0.852	0.76	0.00301156
CD63	1.83429e-07	0.250857	0.991	0.956	0.00326284
FABP5	2.03813e-07	0.47814	0.774	0.529	0.00362543
NEAT1	2.09202e-07	0.456684	0.878	0.737	0.00372128
MSN	2.12571e-07	0.32709	0.704	0.587	0.00378121
RPL26	2.18839e-07	0.2535	1	0.994	0.00389271
CUX1	2.51209e-07	0.256615	0.948	0.904	0.00446851
CTSV	3.72691e-07	0.45091	0.478	0.283	0.00662943
APLP1	4.20937e-07	0.250678	0.539	0.323	0.00748762
CDK2AP1	4.58821e-07	0.256442	0.852	0.795	0.0081615
MXRA8	5.27273e-07	0.281982	0.687	0.471	0.00937913
ITGB1	5.65716e-07	0.279218	0.965	0.973	0.010063
C1orf122	5.6828e-07	0.253103	0.835	0.704	0.0101086
PTGDS	6.72374e-07	0.310457	0.374	0.19	0.0119602
SESN3	6.85782e-07	0.311599	0.722	0.533	0.0121987
RPL12	7.83419e-07	0.268832	1	0.983	0.0139355
SURF4	8.72645e-07	0.255154	0.835	0.684	0.0155226
PHGDH	9.47346e-07	0.289937	0.565	0.377	0.0168514
FBLN1	9.54195e-07	0.333073	0.487	0.315	0.0169732
ITM2C	9.54284e-07	0.250448	0.974	0.945	0.0169748
SARAF	1.00453e-06	0.434212	0.661	0.482	0.0178686
CADM1	1.07193e-06	0.41724	0.8	0.689	0.0190675
CGNL1	1.07969e-06	0.321748	0.93	0.844	0.0192055
DNAJC15	1.0901e-06	0.337244	0.939	0.843	0.0193907
CLIC1	1.11588e-06	0.269814	0.826	0.746	0.0198493
ZYX	1.16647e-06	0.376305	0.93	0.875	0.0207492
MATN2	1.32756e-06	0.345177	0.643	0.468	0.0236146
ATP2B1	1.5737e-06	0.318494	0.809	0.708	0.0279929
SHISA2	1.59205e-06	0.432905	0.522	0.334	0.0283194
SRPX	1.65655e-06	0.282122	0.591	0.399	0.0294667
PRDX1	1.7232e-06	0.266952	0.965	0.919	0.0306523
DES	1.79742e-06	0.373162	0.652	0.477	0.0319725
FILIP1L	1.81172e-06	0.353543	0.391	0.21	0.0322268
TGFB1I1	1.86436e-06	0.267842	0.722	0.584	0.0331633
RUNX1T1	2.20573e-06	0.283402	0.904	0.799	0.0392355
SND1	2.43869e-06	0.26685	0.843	0.727	0.0433793
CALM1	2.54353e-06	0.2963	0.913	0.849	0.0452442
SCARB2	2.73982e-06	0.26985	0.861	0.817	0.0487359
ADAMTS5	2.90677e-06	0.330303	0.252	0.102	0.0517057
ZCCHC24	3.12784e-06	0.252342	0.887	0.758	0.055638
RCN1	3.2561e-06	0.324943	0.774	0.624	0.0579195
RPS17	4.17774e-06	0.389427	0.704	0.514	0.0743137
RPS21	5.78048e-06	0.266589	0.974	0.954	0.102823
SSR2	6.36516e-06	0.264838	0.948	0.865	0.113223
ARID5B	6.49523e-06	0.258427	0.47	0.291	0.115537
C3orf58	6.7339e-06	0.323797	0.722	0.557	0.119783
UCHL1	7.97986e-06	0.322105	0.8	0.667	0.141946
MGARP	9.6611e-06	0.273387	0.548	0.357	0.171852
ID4	1.10402e-05	0.502702	0.539	0.405	0.196383
COL9A3	1.33414e-05	0.265187	0.357	0.192	0.237317
SLC47A1	1.37213e-05	0.311017	0.513	0.364	0.244074
MGP	1.42468e-05	0.465495	0.139	0.044	0.253421
ANXA2	1.42706e-05	0.253426	0.974	0.944	0.253846
LIMS1	1.52918e-05	0.338856	0.713	0.571	0.272011
BGN	1.68873e-05	0.368255	0.287	0.143	0.300391
NECAB1	1.86289e-05	0.259929	0.313	0.163	0.331371
CRTAP	1.98899e-05	0.25683	0.939	0.835	0.353802
ITGAV	2.25627e-05	0.28294	0.904	0.863	0.401345
AHCY	3.16105e-05	0.320029	0.774	0.719	0.562287
TCAF1	3.38314e-05	0.33538	0.609	0.444	0.601793
CTSB	3.55376e-05	0.313814	0.8	0.738	0.632143
NORAD	7.03183e-05	0.282642	0.67	0.493	1
AGRN	7.1796e-05	0.262669	0.757	0.629	1
CST3	8.07888e-05	0.257191	0.826	0.743	1
PLS3	8.22266e-05	0.280725	0.722	0.592	1
STT3B	8.22948e-05	0.250498	0.748	0.604	1
PRKAR2B	8.28336e-05	0.271453	0.643	0.551	1
MYLK	8.42563e-05	0.346441	0.183	0.075	1
TTC3	8.44168e-05	0.251273	0.948	0.921	1
FSCN1	8.84477e-05	0.266342	0.939	0.906	1
RPS29	9.1638e-05	0.270324	1	0.995	1
RACK1	0.000101292	0.300475	0.704	0.53	1
PBX3	0.000108821	0.274963	0.826	0.738	1
LMOD1	0.00011453	0.279804	0.443	0.295	1
GSN	0.000169824	0.25971	0.783	0.676	1
MAP3K1	0.000224605	0.265568	0.513	0.374	1
BMF	0.00022662	0.307131	0.574	0.452	1
BTG3	0.000376444	0.279975	0.678	0.553	1
ACTA1	0.000633642	0.616295	0.243	0.128	1
FAT3	0.00143398	0.319236	0.496	0.376	1
CDKN1C	0.00162396	0.27281	0.791	0.729	1
PCDH7	0.00243326	0.261017	0.913	0.899	1
VEGFA	0.00321036	0.373392	0.826	0.779	1
ETV1	0.00937787	0.251829	0.678	0.611	1
STK38L	0.010786	0.256306	0.583	0.501	1
DLK1	0.0250929	0.284102	0.157	0.099	1
IGFBP7	0.0811073	0.325946	0.583	0.548	1
LGALSL	0.106465	0.26683	0.478	0.423	1
CSRP1	0.140726	0.279484	0.826	0.823	1
PPM1K	0.141898	0.265008	0.757	0.758	1
LEFTY2	0.148781	0.331984	0.33	0.281	1
H19	0.754499	0.379858	0.435	0.457	1

## Sheet: cluster 8
	p_val	avg_logFC	pct.1	pct.2	p_val_adj
ALDH1A2	2.37797e-132	1.70581	0.885	0.032	4.22994e-128		as shown in Figure 3
SMOC2	2.92457e-112	1.19897	0.967	0.064	5.20223e-108
PLAC9	3.72666e-112	1.0626	0.918	0.053	6.62898e-108
WT1	3.39535e-107	0.629267	0.656	0.016	6.03965e-103
FAM150B	1.19876e-98	0.55195	0.557	0.01	2.13235e-94
PKHD1L1	5.79327e-95	0.585176	0.59	0.015	1.03051e-90
ACKR3	2.30808e-92	0.907987	0.672	0.027	4.10561e-88
SLC7A7	3.94604e-89	0.600972	0.689	0.032	7.01922e-85
CNTNAP4	1.40354e-88	0.65682	0.508	0.01	2.49662e-84
SBSPON	9.36141e-88	1.52745	0.967	0.101	1.66521e-83
MARCH1	5.37548e-86	0.625983	0.623	0.024	9.56191e-82
GABRA1	1.96974e-85	0.444439	0.443	0.005	3.50378e-81
RARRES2	7.64359e-84	0.614146	0.672	0.034	1.35964e-79
ARSJ	8.92059e-78	0.687602	0.639	0.033	1.58679e-73
SCNN1G	7.14126e-76	0.344915	0.41	0.006	1.27029e-71
GALNT9	8.62463e-76	0.325169	0.41	0.006	1.53415e-71
ADAMTS5	1.34479e-75	0.967775	0.836	0.075	2.39211e-71
TNNT1	3.82242e-75	1.55952	0.984	0.151	6.79932e-71
COL26A1	2.48654e-74	0.677587	0.639	0.037	4.42305e-70
KCNMA1	7.3997e-70	0.725588	0.705	0.052	1.31626e-65
PDPN	1.10491e-69	0.973734	0.852	0.101	1.96541e-65
NTN1	1.77358e-69	0.382013	0.426	0.01	3.15485e-65
SMPD3	2.57286e-69	0.258334	0.344	0.003	4.57661e-65
ADAM33	3.73017e-69	0.949058	0.82	0.088	6.63522e-65
COL9A3	6.73645e-69	1.42196	0.984	0.163	1.19828e-64
ITLN1	6.45034e-68	0.823637	0.475	0.017	1.14739e-63
TMEM151A	5.87992e-66	0.35166	0.492	0.02	1.04592e-61
BNC1	1.02894e-65	1.44609	0.836	0.106	1.83028e-61
IGFBP3	1.02726e-64	1.84913	0.885	0.127	1.8273e-60
SERPINE3	1.61874e-64	0.342489	0.361	0.006	2.87942e-60
L1TD1	1.47813e-63	0.372665	0.492	0.022	2.6293e-59
GJA1	1.90136e-63	1.6301	0.951	0.158	3.38213e-59
ADAM12	2.05397e-63	0.722894	0.656	0.051	3.6536e-59
TMEM108	3.37248e-63	0.322871	0.492	0.022	5.99896e-59
FXYD7	1.7537e-61	0.393879	0.574	0.036	3.11948e-57
PODXL	2.01921e-61	1.7602	0.951	0.192	3.59177e-57
BICDL1	7.42953e-60	0.281479	0.361	0.008	1.32156e-55
KANK4	1.78975e-59	0.89473	0.754	0.087	3.18361e-55
KLK6	2.4671e-58	0.265919	0.295	0.003	4.38848e-54
LRRN2	1.51463e-57	0.656897	0.672	0.064	2.69423e-53
SLC9A3R1	1.85226e-57	1.59427	0.918	0.179	3.2948e-53
GUCY1A2	2.41996e-57	0.955534	0.852	0.121	4.30463e-53
ESRP1	2.24015e-56	0.326433	0.508	0.029	3.98477e-52
OLFML1	2.26377e-56	0.316305	0.475	0.024	4.0268e-52
HHIP	1.40286e-55	0.392054	0.377	0.012	2.49541e-51
CPNE7	1.39274e-53	0.391206	0.459	0.024	2.4774e-49
CDON	3.44569e-53	0.799347	0.705	0.084	6.12919e-49
JPH4	1.12929e-52	0.542387	0.59	0.049	2.00878e-48
LAMA3	5.40441e-52	0.299071	0.377	0.014	9.61336e-48
SOX6	3.41773e-51	0.7958	0.82	0.131	6.07947e-47
PTGS1	1.40827e-50	0.403703	0.295	0.006	2.50503e-46
CARNS1	6.07904e-50	0.572283	0.656	0.07	1.08134e-45
WNT2B	1.07864e-49	0.302556	0.377	0.016	1.91868e-45
STMN3	1.28895e-49	0.451642	0.623	0.063	2.29279e-45
LPAR1	6.85394e-49	0.287696	0.361	0.014	1.21918e-44
PLAT	7.75587e-49	0.510496	0.639	0.067	1.37961e-44
TBX18	1.71829e-48	1.75599	1	0.295	3.0565e-44
ELMO1	1.87392e-48	0.817638	0.738	0.112	3.33333e-44
C3orf70	2.74839e-47	0.523525	0.672	0.085	4.88884e-43
HEY2	3.74898e-47	0.88394	0.82	0.137	6.66869e-43
SYT4	9.2062e-47	0.32181	0.279	0.006	1.6376e-42
MN1	1.43481e-46	0.803013	0.852	0.161	2.55223e-42
FAM131B	2.82267e-46	0.374182	0.443	0.028	5.02096e-42
ITGA3	5.33514e-46	1.1904	0.967	0.295	9.49015e-42
BST1	2.40686e-45	0.48319	0.623	0.069	4.28132e-41
RDH10	2.70491e-45	1.94714	0.951	0.305	4.8115e-41
LRP2	3.78312e-45	1.17946	0.934	0.259	6.72942e-41
GRM2	6.59426e-45	0.277692	0.279	0.007	1.17299e-40
CAMK2N1	3.96683e-44	1.03214	0.689	0.099	7.05619e-40
MIAT	3.96914e-44	0.356076	0.475	0.037	7.06031e-40
TLL1	7.49203e-44	0.464042	0.443	0.031	1.33268e-39
ADCYAP1	1.39883e-43	0.275164	0.23	0.003	2.48824e-39
PCLO	1.55669e-43	0.574454	0.607	0.072	2.76903e-39
LINC01279	1.9189e-43	0.810416	0.639	0.083	3.41333e-39
TMEM37	7.26931e-42	0.320174	0.459	0.037	1.29306e-37
PTGIS	7.11291e-41	0.541548	0.672	0.102	1.26524e-36
NXPH2	1.77413e-40	0.936793	0.836	0.208	3.15581e-36
NCCRP1	3.18743e-40	0.912866	0.885	0.216	5.6698e-36
DSC3	3.36596e-40	0.77547	0.869	0.193	5.98737e-36
NSG1	1.27327e-39	0.347891	0.607	0.076	2.26488e-35
S100A10	1.31272e-39	1.81105	1	0.556	2.33506e-35
COLEC12	3.78091e-39	0.401236	0.623	0.084	6.72548e-35
SULF2	2.01486e-38	0.727652	0.705	0.121	3.58404e-34
PAPPA	5.57278e-38	0.534944	0.656	0.097	9.91286e-34
GALNT18	5.81616e-38	0.335252	0.41	0.031	1.03458e-33
CEMIP	6.46452e-38	0.250515	0.279	0.011	1.14991e-33
KRT19	6.72311e-38	1.02158	0.934	0.304	1.19591e-33
PPL	1.72719e-37	0.515058	0.721	0.13	3.07232e-33
MYCN	2.86282e-37	1.19545	0.869	0.26	5.09239e-33
RPL7	3.94116e-37	1.23601	1	0.993	7.01053e-33
IGFBP5	4.41739e-37	2.32169	0.984	0.62	7.85765e-33
TRIL	1.17312e-36	0.444291	0.574	0.075	2.08674e-32
NECAB1	1.661e-36	0.830678	0.738	0.146	2.95458e-32
KRT8	9.51778e-36	1.69661	1	0.943	1.69302e-31
GPM6A	1.14493e-35	0.522117	0.639	0.103	2.0366e-31
RPS6	1.51753e-35	1.10425	1	0.997	2.69939e-31
FAM110C	1.58992e-35	0.402463	0.541	0.069	2.82816e-31
WDR66	1.73573e-35	0.35717	0.508	0.063	3.08752e-31
LAMC2	2.18047e-35	0.51631	0.607	0.096	3.87862e-31
KIRREL	3.84213e-35	0.688994	0.754	0.163	6.83438e-31
MYRF	4.33439e-35	1.54672	0.984	0.711	7.71001e-31
B3GNT5	6.12395e-35	0.377661	0.557	0.075	1.08933e-30
SCG5	6.82901e-35	0.708116	0.787	0.196	1.21474e-30
HNMT	1.00331e-34	0.653811	0.672	0.128	1.78468e-30
TNC	1.56866e-34	0.964346	0.754	0.155	2.79034e-30
PAPSS2	1.89191e-34	0.548861	0.656	0.115	3.36532e-30
SDPR	2.8212e-34	0.42326	0.377	0.03	5.01835e-30
RPS7	6.88954e-34	0.842867	1	0.999	1.22551e-29
RPL7A	8.37704e-34	0.857026	1	0.998	1.49011e-29
CSDC2	1.04044e-33	0.466362	0.689	0.128	1.85073e-29
ARAP2	1.09466e-33	0.272523	0.426	0.042	1.94718e-29
RPL34	1.51907e-33	0.971946	1	0.999	2.70212e-29
MMP2	1.76725e-33	0.542551	0.77	0.159	3.14358e-29
RPL37	5.74649e-33	0.987024	1	0.997	1.02219e-28
RPL13	1.29789e-32	0.820087	1	0.999	2.30868e-28
RPS3A	1.32435e-32	0.785928	1	0.999	2.35576e-28
UCHL1	1.7569e-32	1.23389	1	0.662	3.12517e-28
FRAS1	1.83739e-32	1.22308	0.951	0.607	3.26836e-28
KRT18	1.91071e-32	1.80696	0.967	0.745	3.39878e-28
MIR503HG	3.00654e-32	0.300465	0.295	0.018	5.34804e-28
ACTG1	3.862e-32	1.3612	1	0.98	6.86972e-28
ASPHD1	4.80401e-32	0.295986	0.377	0.033	8.54537e-28
PHLDB2	8.50935e-32	0.715338	0.902	0.302	1.51364e-27
RPL5	1.5595e-31	0.715088	1	0.999	2.77404e-27
NPM1	2.9663e-31	0.88812	1	0.985	5.27645e-27
EDN1	3.51744e-31	0.448643	0.525	0.072	6.25683e-27
SIM1	3.79086e-31	0.281764	0.377	0.034	6.74319e-27
RPL18A	4.3363e-31	0.797358	1	0.999	7.71341e-27
MICAL2	4.96575e-31	1.24704	1	0.73	8.83308e-27
SFRP5	5.68256e-31	0.925899	0.77	0.185	1.01081e-26
LAMC1	7.06931e-31	1.30759	0.984	0.931	1.25749e-26
IPO5P1	7.49871e-31	1.19067	0.738	0.201	1.33387e-26
SPARC	1.49685e-30	1.42762	1	0.895	2.66259e-26
RPL19	1.78524e-30	0.777779	1	0.994	3.17559e-26
GAP43	2.22826e-30	0.42753	0.508	0.071	3.96363e-26
MYL12B	2.6306e-30	0.999794	0.984	0.844	4.67931e-26
RPS12	3.07722e-30	0.793587	1	0.995	5.47376e-26
RPL11	3.26164e-30	0.786568	1	0.995	5.80181e-26
RPS23	3.30946e-30	0.753527	1	0.999	5.88686e-26
TGFBR1	3.86832e-30	0.995864	0.951	0.491	6.88097e-26
RPL6	4.447e-30	0.763714	1	0.997	7.91033e-26
RPL10A	4.82809e-30	0.817978	1	0.997	8.58821e-26
APLP1	5.0641e-30	0.935288	0.869	0.315	9.00802e-26
RPL26	6.73717e-30	0.735038	1	0.994	1.19841e-25
CLDN15	6.96041e-30	0.398584	0.443	0.055	1.23812e-25
RPL10	7.03607e-30	0.754081	1	0.999	1.25158e-25
CYB5R2	8.51458e-30	0.433887	0.541	0.086	1.51457e-25
MARCKS	8.96085e-30	1.25925	1	0.658	1.59396e-25
RPL41	9.43872e-30	0.716138	1	1	1.67896e-25
CCDC80	9.86733e-30	1.47276	0.951	0.61	1.7552e-25
RPL15	1.20026e-29	0.635666	1	1	2.13503e-25
RPS16	1.33371e-29	0.780965	1	0.985	2.37241e-25
SULF1	2.93757e-29	0.929032	0.738	0.184	5.22534e-25
RPL35A	3.4046e-29	0.755991	1	0.996	6.0561e-25
RPL14	4.77253e-29	0.705751	1	0.996	8.48938e-25
C1orf198	5.74903e-29	1.01638	1	0.748	1.02264e-24
DNAAF3	6.63785e-29	0.251367	0.361	0.035	1.18074e-24
TMEM176B	7.47466e-29	0.738747	0.787	0.211	1.32959e-24
EZR	1.07183e-28	1.04881	0.984	0.836	1.90657e-24
RPS3	2.04443e-28	0.744421	1	0.989	3.63663e-24
RPS2	2.05418e-28	0.669384	1	1	3.65398e-24
CYBRD1	2.11237e-28	0.317089	0.508	0.076	3.75748e-24
RPL32	2.19373e-28	0.730417	1	0.995	3.90221e-24
LAMA5	2.39037e-28	1.05277	0.967	0.842	4.25198e-24
EEF1A1	2.72193e-28	0.511841	1	1	4.84177e-24
RPS8	4.57395e-28	0.704734	1	1	8.13615e-24
RPL38	5.13957e-28	0.740121	1	0.994	9.14226e-24
IFITM3	5.62394e-28	1.07498	1	0.925	1.00039e-23
ID4	8.08212e-28	1.06798	0.918	0.389	1.43765e-23
RHPN2	9.51281e-28	0.632948	0.738	0.204	1.69214e-23
RPL3	9.71811e-28	0.67668	1	0.996	1.72866e-23
PRDX6	1.06936e-27	0.989749	0.984	0.958	1.90218e-23
TMEM98	1.67028e-27	1.00295	0.984	0.732	2.97109e-23
RPS20	1.71688e-27	0.689219	1	0.997	3.05399e-23
C1QL1	1.84957e-27	0.448616	0.557	0.103	3.29001e-23
RPL4	2.19222e-27	0.620937	1	0.999	3.89952e-23
CTSH	2.82164e-27	0.388472	0.525	0.087	5.01914e-23
RPL23A	3.25569e-27	0.799088	1	0.991	5.79122e-23
RPS15A	3.60171e-27	0.758105	1	0.999	6.40672e-23
OLFML3	4.02706e-27	0.98811	0.902	0.381	7.16333e-23
EPHB2	4.19132e-27	0.428297	0.557	0.107	7.45553e-23
RPL23	5.00909e-27	0.723589	1	0.994	8.91016e-23
RPS29	6.64968e-27	0.810955	1	0.995	1.18284e-22
TUBB	6.8647e-27	0.83362	1	0.986	1.22109e-22
PTMA	7.72612e-27	0.755094	1	0.978	1.37432e-22
MTCL1	8.45207e-27	0.298657	0.377	0.044	1.50345e-22
RPS5	1.40861e-26	0.73009	1	0.989	2.50563e-22
C1orf168	1.63149e-26	0.400467	0.426	0.056	2.9021e-22
PLS3	2.49905e-26	0.916305	0.967	0.584	4.44532e-22
IGFBP4	2.66643e-26	0.792328	0.738	0.221	4.74305e-22
C3orf58	2.82627e-26	0.890229	0.951	0.552	5.02737e-22
HOXB4	3.42701e-26	0.292375	0.377	0.044	6.09596e-22
VASN	3.53937e-26	0.459998	0.721	0.193	6.29582e-22
RPL36	3.95963e-26	0.676896	1	0.979	7.04339e-22
TXNDC17	4.42974e-26	0.779168	0.934	0.444	7.87963e-22
CRIM1	4.50706e-26	0.884483	0.869	0.352	8.01716e-22
AGRN	6.0125e-26	0.911054	0.967	0.623	1.0695e-21
RPL30	8.2961e-26	0.675641	1	0.996	1.47571e-21
RPL12	1.08399e-25	0.728533	1	0.984	1.9282e-21
RPS25	1.14881e-25	0.598331	1	0.999	2.0435e-21
RPL9	1.15394e-25	0.648993	1	0.999	2.05262e-21
IGFBP2	1.1728e-25	0.857272	0.902	0.429	2.08618e-21
LOC100288911	1.71682e-25	0.284596	0.492	0.079	3.05388e-21
VIM	1.9994e-25	0.972922	1	0.882	3.55652e-21
RPL27A	2.4106e-25	0.698148	1	0.994	4.28798e-21
SH3GL3	2.47029e-25	0.572061	0.852	0.311	4.39416e-21
RPS27A	2.5085e-25	0.592724	1	0.996	4.46213e-21
EFNB2	3.87726e-25	0.947291	0.984	0.605	6.89688e-21
IQGAP1	4.32696e-25	0.811109	0.902	0.413	7.6968e-21
LOC646762	5.57792e-25	1.09052	0.934	0.573	9.92201e-21
RPL29	5.95511e-25	0.775265	0.984	0.974	1.05929e-20
TMEM176A	8.15362e-25	0.860374	0.738	0.228	1.45037e-20
SLITRK2	8.36956e-25	0.374614	0.508	0.089	1.48878e-20
KCNA5	9.44186e-25	0.497376	0.672	0.159	1.67952e-20
COL14A1	1.19987e-24	0.296699	0.475	0.072	2.13433e-20
COBLL1	1.29017e-24	0.915296	0.836	0.383	2.29495e-20
MAF	1.44963e-24	0.846347	0.59	0.139	2.57861e-20
RPS11	1.68132e-24	0.623088	1	0.993	2.99073e-20
RPS19	1.71803e-24	0.776448	1	0.985	3.05603e-20
MAP3K1	1.8264e-24	0.807024	0.852	0.361	3.2488e-20
TPT1	2.11627e-24	0.518789	1	0.999	3.76442e-20
IFITM2	3.04218e-24	0.83413	1	0.856	5.41144e-20
RPL39	3.84264e-24	0.68353	1	0.983	6.83529e-20
CSRP2	4.57881e-24	1.03647	0.984	0.757	8.1448e-20
EEF1B2	5.42653e-24	0.72039	0.984	0.968	9.65271e-20
RPL18	5.49236e-24	0.682524	0.984	0.982	9.76981e-20
NEO1	6.58705e-24	0.763424	0.869	0.397	1.1717e-19
CDC42EP1	7.93906e-24	0.58759	0.869	0.309	1.4122e-19
GLS	9.11958e-24	0.822871	0.967	0.75	1.62219e-19
MYH10	9.92237e-24	0.887594	1	0.907	1.76499e-19
RPL27	1.15728e-23	0.688556	1	0.991	2.05857e-19
HNRNPA1	1.65491e-23	0.655653	1	0.985	2.94375e-19
COL3A1	1.71084e-23	0.903496	0.984	0.615	3.04324e-19
RPS14	1.77867e-23	0.68268	0.984	0.982	3.16389e-19
CD200	1.89348e-23	0.721554	0.754	0.248	3.36811e-19
LEPROTL1	2.19064e-23	0.720751	0.967	0.668	3.8967e-19
SSC4D	2.25972e-23	0.301483	0.377	0.051	4.01959e-19
PTPRF	2.65008e-23	0.739316	0.984	0.722	4.71397e-19
THY1	2.80082e-23	0.306296	0.426	0.065	4.9821e-19
CD74	2.81992e-23	0.435109	0.639	0.156	5.01607e-19
RPS21	3.24655e-23	0.678051	1	0.953	5.77496e-19
RBM3	3.70449e-23	0.821945	0.934	0.702	6.58955e-19
RPS24	4.54962e-23	0.572626	1	0.998	8.09286e-19
FAM234B	4.59795e-23	0.27953	0.426	0.067	8.17883e-19
SSBP3	9.48053e-23	0.80024	0.967	0.764	1.6864e-18
NAXE	1.09234e-22	0.89836	0.738	0.298	1.94305e-18
RPL31	1.50564e-22	0.661989	1	0.989	2.67824e-18
SEZ6L2	2.00835e-22	0.3928	0.639	0.16	3.57246e-18
APBB2	2.37063e-22	0.489473	0.721	0.227	4.21687e-18
RPS9	2.57872e-22	0.632261	1	0.969	4.58702e-18
ZDHHC8P1	2.86863e-22	0.34965	0.541	0.114	5.10272e-18
LRRN1	3.38074e-22	0.295048	0.393	0.057	6.01367e-18
TMSB10	4.06533e-22	0.78581	1	0.953	7.23141e-18
RHOU	4.10281e-22	0.605028	0.59	0.141	7.29808e-18
RPS27	4.16697e-22	0.577129	1	0.998	7.41221e-18
LEPR	4.57071e-22	0.889621	0.934	0.634	8.13037e-18
COL1A1	9.36439e-22	0.707865	0.984	0.857	1.66574e-17
TMSB4X	9.72995e-22	0.827788	0.984	0.725	1.73076e-17
FSTL1	1.506e-21	0.773089	0.984	0.95	2.67887e-17
DSEL	1.73774e-21	0.562959	0.721	0.212	3.09109e-17
LRRN4	1.789e-21	0.283651	0.541	0.115	3.18228e-17
RRP9	1.92139e-21	0.439733	0.639	0.182	3.41777e-17
PTBP1	2.66964e-21	0.672054	0.951	0.649	4.74876e-17
RPL37A	2.72788e-21	0.584254	1	0.997	4.85236e-17
TERF1	3.63767e-21	0.845283	0.918	0.587	6.47069e-17
PPIA	5.21179e-21	0.470637	1	0.998	9.27074e-17
RPLP2	5.64611e-21	0.575789	1	0.988	1.00433e-16
CREB3L1	6.27217e-21	0.51874	0.721	0.235	1.11569e-16
ARNT2	7.44359e-21	0.295278	0.557	0.125	1.32407e-16
CDKN1C	7.94629e-21	0.925969	0.967	0.722	1.41349e-16
RPL17	8.76027e-21	0.674843	1	0.985	1.55828e-16
EFNA5	8.78628e-21	0.930774	0.902	0.557	1.5629e-16
PLA2G12A	9.16398e-21	0.909367	0.951	0.72	1.63009e-16
PABPC1	9.74904e-21	0.559671	1	0.974	1.73416e-16
DPPA4	1.75236e-20	0.299351	0.328	0.043	3.11709e-16
RPLP1	1.90651e-20	0.553672	1	1	3.39129e-16
BCHE	2.32173e-20	0.696023	0.754	0.284	4.12989e-16
MYO1D	2.62538e-20	0.483079	0.77	0.284	4.67003e-16
THSD4	2.64879e-20	0.522004	0.475	0.103	4.71167e-16
ADAMTS15	3.14326e-20	0.290771	0.492	0.106	5.59123e-16
DNAJC1	3.1605e-20	0.643832	0.852	0.441	5.62189e-16
ST6GALNAC3	4.2359e-20	0.446321	0.705	0.218	7.53482e-16
LUM	4.24174e-20	0.529196	0.393	0.068	7.5452e-16
LOX	4.24904e-20	0.430498	0.492	0.101	7.5582e-16
LIMA1	4.71052e-20	0.490283	0.689	0.209	8.37907e-16
RPS28	4.74228e-20	0.584123	1	0.978	8.43557e-16
RAB11FIP1	5.90084e-20	0.740991	0.82	0.416	1.04964e-15
FLRT2	5.96732e-20	0.76851	0.984	0.715	1.06147e-15
LPCAT2	8.07172e-20	0.304888	0.475	0.103	1.4358e-15
RSRP1	1.02852e-19	0.908998	0.77	0.332	1.82953e-15
MYH9	1.13845e-19	0.605399	1	0.804	2.02507e-15
RPL22	1.16014e-19	0.505444	1	0.983	2.06366e-15
RPL35	1.36465e-19	0.583927	1	0.984	2.42743e-15
HMGN1	1.6724e-19	0.571355	0.984	0.969	2.97486e-15
SSR2	1.74885e-19	0.554318	0.951	0.869	3.11086e-15
RND3	1.97202e-19	0.451625	0.557	0.139	3.50783e-15
SEPT7	2.14225e-19	0.673169	0.967	0.955	3.81063e-15
PTTG1	2.75628e-19	0.33492	0.574	0.148	4.90287e-15
DFNA5	3.16291e-19	0.351889	0.59	0.16	5.62619e-15
RAN	3.76852e-19	0.629715	0.984	0.901	6.70344e-15
TMEM88	5.29484e-19	0.567906	0.82	0.356	9.41846e-15
CAPN2	5.77206e-19	0.713984	0.934	0.892	1.02673e-14
ASH2L	7.60485e-19	0.738253	0.918	0.63	1.35275e-14
DCN	8.2136e-19	0.591096	0.443	0.091	1.46104e-14
CDK4	8.57077e-19	0.612397	0.951	0.676	1.52457e-14
RPL28	1.05002e-18	0.554786	1	0.98	1.86778e-14
FAM84B	1.28789e-18	0.850827	0.967	0.675	2.2909e-14
PLCE1	1.55276e-18	0.359165	0.574	0.155	2.76204e-14
MEST	1.61348e-18	0.600188	0.836	0.374	2.87005e-14
H3F3B	1.75436e-18	0.520684	1	0.965	3.12066e-14
SNAP23	2.17355e-18	0.397563	0.721	0.25	3.86631e-14
ACTB	3.2257e-18	0.624678	1	0.981	5.73788e-14
RACK1	4.26046e-18	1.12598	0.803	0.533	7.5785e-14
PLXNB2	4.93713e-18	0.632818	0.902	0.585	8.78216e-14
MGST1	5.1822e-18	0.775974	0.902	0.673	9.2181e-14
ASXL3	5.42196e-18	0.520862	0.754	0.308	9.64457e-14
ODC1	5.7032e-18	0.66306	0.902	0.614	1.01448e-13
TSPAN3	6.28029e-18	0.583382	0.967	0.885	1.11714e-13
RPS4X	8.18156e-18	0.492926	1	0.995	1.45534e-13
SARAF	8.33221e-18	1.3292	0.77	0.485	1.48213e-13
ZNF641	1.17868e-17	0.480949	0.77	0.319	2.09664e-13
TINAGL1	1.21496e-17	0.273702	0.541	0.139	2.16117e-13
RAB15	1.47513e-17	0.561373	0.721	0.294	2.62397e-13
MGP	1.7218e-17	0.266225	0.295	0.04	3.06274e-13
EIF3E	1.78411e-17	0.60944	0.967	0.963	3.17358e-13
MARCKSL1	2.16867e-17	0.612304	1	0.941	3.85763e-13
RPL24	2.39725e-17	0.538505	1	0.983	4.26423e-13
PCDH17	2.39799e-17	0.680294	0.656	0.226	4.26554e-13
LRRC1	2.87062e-17	0.377941	0.656	0.221	5.10625e-13
BNC2	3.01943e-17	0.412351	0.475	0.112	5.37096e-13
PAK4	3.32484e-17	0.543582	0.852	0.509	5.91423e-13
GALNT10	3.58077e-17	0.390217	0.689	0.241	6.36947e-13
APEX1	3.73052e-17	0.531433	0.967	0.894	6.63585e-13
RPS17	4.04994e-17	0.953439	0.803	0.519	7.20404e-13
FLNA	4.06076e-17	0.603962	0.967	0.725	7.22329e-13
NPNT	4.82738e-17	0.592518	0.459	0.109	8.58694e-13
NME4	5.39804e-17	0.527662	1	0.961	9.60204e-13
RPL13A	5.68389e-17	0.555344	0.984	0.96	1.01105e-12
LRRC32	7.31527e-17	0.321772	0.607	0.182	1.30124e-12
SPOPL	7.53066e-17	0.398217	0.689	0.257	1.33955e-12
SLC2A1	7.58009e-17	0.548251	0.803	0.357	1.34835e-12
STK26	7.98378e-17	0.557877	0.639	0.23	1.42015e-12
GABRB2	8.23634e-17	0.525504	0.721	0.269	1.46508e-12
ZFAS1	9.19069e-17	0.888505	0.787	0.442	1.63484e-12
KAZN	9.41805e-17	0.371723	0.639	0.209	1.67528e-12
ABRACL	9.96846e-17	0.456969	0.672	0.251	1.77319e-12
HNRNPC	1.05645e-16	0.407876	1	0.984	1.87921e-12
TPM4	1.51129e-16	0.622665	0.967	0.843	2.68828e-12
TNS3	1.76694e-16	0.38306	0.672	0.234	3.14304e-12
NFIB	2.17088e-16	0.652563	0.918	0.624	3.86157e-12
PARD6B	2.19069e-16	0.586114	0.82	0.442	3.8968e-12
ITGA11	2.68914e-16	0.382264	0.279	0.04	4.78344e-12
ISYNA1	2.8087e-16	0.722534	0.967	0.871	4.99611e-12
RPL36A	3.1785e-16	0.478837	0.951	0.728	5.65392e-12
EHD2	3.92924e-16	0.433799	0.639	0.211	6.98933e-12
TM4SF1	4.59195e-16	0.372514	0.246	0.03	8.16816e-12
FAU	4.79258e-16	0.469112	1	0.984	8.52504e-12
PHGDH	5.05294e-16	0.564715	0.803	0.373	8.98817e-12
CBLN2	5.81118e-16	0.31266	0.344	0.064	1.03369e-11
NPY1R	6.78278e-16	0.275398	0.41	0.089	1.20652e-11
EIF3M	7.60612e-16	0.54235	0.951	0.729	1.35298e-11
B4GALNT4	8.10716e-16	0.424744	0.689	0.286	1.4421e-11
BMP1	8.29457e-16	0.461514	0.705	0.289	1.47544e-11
HSP90AB1	9.23918e-16	0.409376	1	0.997	1.64347e-11
MPST	1.12758e-15	0.526186	0.852	0.538	2.00575e-11
MEGF6	1.15943e-15	0.314251	0.426	0.095	2.0624e-11
SHTN1	1.16767e-15	0.399081	0.459	0.121	2.07706e-11
RAC1	1.33697e-15	0.431369	1	0.971	2.3782e-11
EIF3H	1.48503e-15	0.494598	0.967	0.904	2.64158e-11
ANXA2	1.5903e-15	0.59865	0.984	0.945	2.82883e-11
SND1	2.10146e-15	0.563062	0.918	0.729	3.73807e-11
RAB32	2.59723e-15	0.308377	0.574	0.173	4.61996e-11
COL5A2	2.79572e-15	0.310612	0.885	0.505	4.97302e-11
SERP1	2.99844e-15	0.510648	0.951	0.649	5.33363e-11
ARHGAP23	3.12669e-15	0.610601	0.803	0.477	5.56175e-11
CDV3	3.53962e-15	0.465957	0.951	0.816	6.29628e-11
TCAF1	4.05024e-15	0.996693	0.77	0.443	7.20457e-11
BASP1	4.70832e-15	0.58174	0.984	0.646	8.37516e-11
ZYX	4.88026e-15	0.566882	0.951	0.877	8.68101e-11
SGIP1	5.07237e-15	0.377957	0.574	0.18	9.02274e-11
GRIK1	5.69842e-15	0.382148	0.689	0.248	1.01363e-10
SH2D3C	5.99927e-15	0.374366	0.426	0.104	1.06715e-10
NHSL1	6.04823e-15	0.414828	0.77	0.333	1.07586e-10
EPS8	7.34602e-15	0.522591	0.77	0.365	1.30671e-10
ARL4D	7.72306e-15	0.46974	0.689	0.279	1.37378e-10
CALD1	9.54077e-15	0.550294	0.984	0.899	1.69711e-10
TRNP1	9.63421e-15	0.360976	0.754	0.319	1.71373e-10
SEMA6A	9.8544e-15	0.533767	0.869	0.447	1.7529e-10
COL6A1	1.00752e-14	0.522306	0.984	0.908	1.79218e-10
S100A11	1.11785e-14	0.497368	0.869	0.517	1.98843e-10
PARG	1.13933e-14	0.494475	0.721	0.348	2.02664e-10
EIF3F	1.26488e-14	0.478298	0.918	0.922	2.24997e-10
RPS13	1.30484e-14	0.420834	1	0.998	2.32104e-10
HINT1	1.4958e-14	0.464634	0.984	0.936	2.66073e-10
SYNPO	1.53541e-14	0.515208	0.689	0.269	2.73119e-10
IL6ST	1.81061e-14	0.589666	0.967	0.887	3.22071e-10
NPY	1.85991e-14	0.289116	0.213	0.025	3.3084e-10
RPL8	2.16435e-14	0.38203	0.967	0.987	3.84994e-10
CDK1	2.23873e-14	0.337332	0.377	0.082	3.98225e-10
RPS15	2.4508e-14	0.4259	0.984	0.99	4.35949e-10
LDOC1	2.5202e-14	0.586116	0.885	0.6	4.48294e-10
WISP1	2.76015e-14	0.495328	0.361	0.076	4.90976e-10
SNRPB	2.87399e-14	0.519733	0.902	0.746	5.11225e-10
CDH3	3.56828e-14	0.493612	0.77	0.399	6.34726e-10
DSC2	3.59263e-14	0.567717	0.803	0.466	6.39056e-10
ATP7B	4.02219e-14	0.482295	0.508	0.167	7.15468e-10
FXYD5	4.51813e-14	0.293096	0.492	0.137	8.03684e-10
FTL	4.79784e-14	0.497747	1	0.97	8.53441e-10
HES4	4.973e-14	0.359334	0.475	0.141	8.84597e-10
DMKN	5.20327e-14	0.559077	0.852	0.504	9.25558e-10
DAPK1	5.35437e-14	0.273251	0.557	0.177	9.52436e-10
ASAP2	5.83592e-14	0.323884	0.721	0.315	1.03809e-09
RPS10	6.21878e-14	0.48656	0.918	0.733	1.1062e-09
CCDC85C	6.25315e-14	0.301677	0.623	0.239	1.11231e-09
DYNC2H1	6.31201e-14	0.369743	0.721	0.304	1.12278e-09
ABCC1	6.99896e-14	0.282258	0.59	0.2	1.24497e-09
CPNE2	7.09388e-14	0.335034	0.607	0.214	1.26186e-09
MFAP2	7.26794e-14	0.491726	0.852	0.534	1.29282e-09
KIAA1522	1.05001e-13	0.358143	0.738	0.337	1.86776e-09
ASS1	1.13965e-13	0.441801	0.738	0.363	2.02722e-09
TCF7L2	1.54116e-13	0.638455	0.918	0.707	2.74142e-09
ITM2A	1.70929e-13	0.262037	0.41	0.099	3.04049e-09
TRAF5	1.7277e-13	0.298631	0.557	0.181	3.07323e-09
GOLM1	1.89013e-13	0.531041	0.82	0.523	3.36216e-09
ANXA3	1.98955e-13	0.604409	0.787	0.439	3.53902e-09
CLDND1	2.01277e-13	0.705173	0.918	0.706	3.58032e-09
CRMP1	2.07636e-13	0.316185	0.426	0.111	3.69342e-09
CNN3	2.1961e-13	0.421235	0.885	0.516	3.90642e-09
LGALS3	2.57558e-13	0.332596	0.525	0.158	4.58144e-09
FAT4	3.07283e-13	0.394415	0.607	0.221	5.46596e-09
COL1A2	3.32527e-13	0.332459	0.967	0.695	5.91499e-09
ADGRG6	3.7132e-13	0.312939	0.443	0.119	6.60505e-09
DZIP1	3.90969e-13	0.490425	0.721	0.369	6.95455e-09
BTF3	4.24113e-13	0.49678	1	0.952	7.54412e-09
LITAF	5.38839e-13	0.52901	0.869	0.548	9.58486e-09
PGRMC1	5.46806e-13	0.444327	0.951	0.821	9.72658e-09
SLITRK4	5.66325e-13	0.48781	0.656	0.273	1.00738e-08
ANTXR1	5.77491e-13	0.434219	0.852	0.568	1.02724e-08
AHCY	5.81487e-13	0.492354	0.902	0.714	1.03435e-08
EIF4EBP1	5.97869e-13	0.496993	0.885	0.57	1.06349e-08
HSP90B1	6.05998e-13	0.578755	0.984	0.946	1.07795e-08
CREB5	6.11756e-13	0.499628	0.656	0.269	1.08819e-08
NFIA	6.3785e-13	0.565099	0.803	0.472	1.13461e-08
CCT6A	6.57862e-13	0.439044	0.967	0.877	1.1702e-08
SPIN4	7.12225e-13	0.570912	0.607	0.251	1.26691e-08
TMEM170B	8.96751e-13	0.265059	0.607	0.219	1.59514e-08
CYB5D1	9.86486e-13	0.314357	0.607	0.226	1.75476e-08
GAL3ST3	1.05575e-12	0.289563	0.492	0.159	1.87797e-08
TRAPPC2L	1.11317e-12	0.319818	0.721	0.335	1.98011e-08
CHD3	1.21462e-12	0.463701	0.803	0.498	2.16057e-08
COL11A1	1.2481e-12	0.358762	0.525	0.173	2.22012e-08
GSTP1	1.27234e-12	0.440678	0.951	0.914	2.26324e-08
HNRNPDL	1.34019e-12	0.695246	0.803	0.507	2.38393e-08
LRRC75A-AS1	1.52935e-12	0.668031	0.803	0.507	2.72041e-08
LASP1	1.55895e-12	0.430078	0.82	0.492	2.77306e-08
CBX1	1.59806e-12	0.354858	0.852	0.561	2.84264e-08
UBA52	1.78767e-12	0.375551	1	0.978	3.1799e-08
SEC61B	1.85444e-12	0.495203	0.934	0.738	3.29867e-08
STMN1	2.33087e-12	0.494639	1	0.968	4.14615e-08
RPL36A-HNRNPH2	2.34983e-12	0.397523	0.869	0.575	4.17987e-08
REXO2	2.88613e-12	0.467738	0.852	0.55	5.13385e-08
HNRNPAB	2.94054e-12	0.533424	0.951	0.784	5.23063e-08
SERPING1	2.9467e-12	0.416898	0.754	0.429	5.24158e-08
FREM2	2.96126e-12	0.609313	0.869	0.516	5.26748e-08
POLE4	2.97566e-12	0.279899	0.623	0.247	5.2931e-08
HNRNPK	3.24504e-12	0.394939	1	0.978	5.77227e-08
UNC5C	3.79767e-12	0.297738	0.541	0.186	6.7553e-08
ARPC5	3.97705e-12	0.469664	0.902	0.783	7.07438e-08
COL5A1	3.99582e-12	0.27751	0.885	0.527	7.10777e-08
DLG2	4.0104e-12	0.300299	0.459	0.144	7.13369e-08
FNBP1L	4.21628e-12	0.412771	0.738	0.393	7.49992e-08
ITGA1	4.42792e-12	0.449987	0.639	0.257	7.87638e-08
FILIP1L	4.56598e-12	0.393507	0.574	0.208	8.12197e-08
SNHG16	4.86879e-12	0.358826	1	0.947	8.66061e-08
TMEM123	5.52393e-12	0.509303	0.885	0.732	9.82596e-08
CCNYL1	5.59362e-12	0.427466	0.623	0.283	9.94993e-08
HSPA8	5.59729e-12	0.4075	1	0.99	9.95645e-08
LIMS1	5.60123e-12	0.506308	0.852	0.57	9.96348e-08
ARID5B	5.73202e-12	0.388596	0.672	0.289	1.01961e-07
FBLN2	6.12513e-12	0.349897	0.672	0.279	1.08954e-07
MPP5	6.14506e-12	0.43022	0.77	0.467	1.09308e-07
GCA	7.0882e-12	0.33878	0.787	0.447	1.26085e-07
MDFIC	7.16557e-12	0.459793	0.689	0.365	1.27461e-07
ARHGAP28	7.42903e-12	0.327741	0.525	0.19	1.32148e-07
TCEAL9	8.11886e-12	0.525906	0.754	0.414	1.44418e-07
ANXA11	8.49265e-12	0.404281	0.787	0.532	1.51067e-07
FSCN1	8.78853e-12	0.36664	0.967	0.906	1.5633e-07
GNAI2	9.07819e-12	0.387558	0.951	0.835	1.61483e-07
HERPUD2	9.61873e-12	0.432546	0.738	0.426	1.71098e-07
SNX30	1.07727e-11	0.268852	0.492	0.167	1.91624e-07
SKI	1.09079e-11	0.423675	0.869	0.553	1.94029e-07
NONO	1.09541e-11	0.378785	1	0.951	1.94852e-07
GCNT2	1.14469e-11	0.295074	0.623	0.248	2.03618e-07
BZW1	1.32159e-11	0.47961	0.951	0.841	2.35085e-07
SERPINB9	1.35522e-11	0.416405	0.689	0.308	2.41067e-07
COL6A2	1.38966e-11	0.449411	0.869	0.563	2.47194e-07
MAP1LC3A	1.6616e-11	0.559324	0.754	0.501	2.95566e-07
NECTIN2	1.71152e-11	0.400354	0.689	0.332	3.04446e-07
SNHG5	1.76196e-11	0.385391	0.902	0.661	3.13418e-07
CANX	1.76594e-11	0.33103	1	0.956	3.14125e-07
CLIP3	1.88002e-11	0.402673	0.869	0.552	3.34417e-07
EFNB1	1.89204e-11	0.40575	0.607	0.268	3.36556e-07
NHP2	2.16638e-11	0.342786	0.869	0.604	3.85356e-07
TMEM43	2.20114e-11	0.265829	0.639	0.275	3.91538e-07
COL27A1	2.25869e-11	0.349833	0.607	0.235	4.01777e-07
YBX3	2.36981e-11	0.356084	0.656	0.295	4.21542e-07
ATP10D	2.40407e-11	0.507172	0.459	0.155	4.27637e-07
PARVA	3.1423e-11	0.436275	0.902	0.623	5.58952e-07
CTSC	3.27276e-11	0.476058	0.803	0.565	5.82158e-07
CD47	3.28124e-11	0.485071	0.836	0.594	5.83667e-07
HNRNPA3	3.2912e-11	0.388859	0.967	0.905	5.85438e-07
RCN1	3.42958e-11	0.453651	0.869	0.626	6.10054e-07
SFPQ	4.40266e-11	0.488533	0.951	0.88	7.83145e-07
LOXL1	4.65456e-11	0.441872	0.623	0.273	8.27954e-07
CHML	5.29437e-11	0.385337	0.672	0.335	9.41762e-07
TRIP6	5.57532e-11	0.407219	0.803	0.499	9.91738e-07
HEG1	6.04602e-11	0.494921	0.869	0.654	1.07547e-06
HNRNPH1	6.12742e-11	0.412761	0.984	0.904	1.08995e-06
ST3GAL5	6.32273e-11	0.30493	0.508	0.183	1.12469e-06
MEIS3	7.33406e-11	0.272452	0.623	0.264	1.30458e-06
APMAP	8.67791e-11	0.327923	0.82	0.486	1.54363e-06
NOTCH3	8.98116e-11	0.421642	0.754	0.417	1.59757e-06
PCDH18	9.32173e-11	0.314244	0.41	0.119	1.65815e-06
HNRNPA2B1	9.64782e-11	0.392629	0.984	0.986	1.71615e-06
NYNRIN	9.70217e-11	0.454225	0.836	0.573	1.72582e-06
PFN2	1.06299e-10	0.357731	0.984	0.936	1.89085e-06
CKAP4	1.08107e-10	0.353915	0.967	0.889	1.92301e-06
LGALS8	1.1113e-10	0.381334	0.705	0.401	1.97679e-06
HN1	1.14799e-10	0.509535	0.82	0.596	2.04205e-06
KIAA1551	1.14936e-10	0.667585	0.721	0.456	2.04448e-06
CXADR	1.1584e-10	0.539971	0.869	0.778	2.06056e-06
CCND2	1.2812e-10	0.482954	0.934	0.881	2.27901e-06
HACD3	1.31565e-10	0.510581	0.721	0.4	2.34027e-06
CLU	1.35154e-10	0.308567	0.656	0.299	2.40411e-06
RIN2	1.48042e-10	0.451149	0.836	0.529	2.63337e-06
EIF4G2	1.50431e-10	0.346895	0.984	1	2.67586e-06
ARPC2	1.66515e-10	0.394877	0.967	0.972	2.96197e-06
RPLP0	1.8648e-10	0.331523	0.984	0.984	3.3171e-06
NUTM2B-AS1	2.1222e-10	0.319743	0.59	0.258	3.77497e-06
DAAM1	2.33902e-10	0.453255	0.951	0.805	4.16065e-06
ANXA5	2.38911e-10	0.497843	0.951	0.842	4.24974e-06
PDCD4	2.70885e-10	0.310404	0.721	0.364	4.81851e-06
PLEKHG3	2.76615e-10	0.353965	0.689	0.354	4.92042e-06
SEP15	2.76759e-10	0.395679	0.869	0.673	4.92299e-06
ETS2	2.81391e-10	0.398913	0.656	0.333	5.00539e-06
PLXNA2	2.85945e-10	0.446476	0.754	0.461	5.08639e-06
HOXB2	2.94263e-10	0.340264	0.541	0.223	5.23435e-06
ATIC	2.9633e-10	0.33639	0.852	0.557	5.27113e-06
SEC11A	3.0903e-10	0.425575	0.951	0.854	5.49702e-06
IQCA1	3.12549e-10	0.300049	0.508	0.189	5.55962e-06
HMGB1	3.31665e-10	0.440457	1	0.974	5.89965e-06
SPECC1	3.56107e-10	0.32129	0.656	0.34	6.33444e-06
RSL1D1	3.65349e-10	0.389048	0.934	0.754	6.49883e-06
COL16A1	3.73565e-10	0.316019	0.508	0.205	6.64497e-06
SLBP	3.78399e-10	0.262424	0.836	0.494	6.73095e-06
RAI14	4.11328e-10	0.367676	0.918	0.571	7.3167e-06
NOTCH2	4.12453e-10	0.387463	0.82	0.511	7.33671e-06
PTP4A1	4.41762e-10	0.361005	0.918	0.688	7.85807e-06
COMMD8	4.75958e-10	0.25895	0.59	0.252	8.46633e-06
OSTC	4.76259e-10	0.396457	0.967	0.824	8.4717e-06
CORO1B	4.87761e-10	0.295336	0.738	0.407	8.6763e-06
RBMX	5.52089e-10	0.422044	0.934	0.883	9.82056e-06
FLJ44635	6.11023e-10	0.499145	0.738	0.432	1.08689e-05
SPAG9	6.34427e-10	0.450343	0.787	0.547	1.12852e-05
SLC20A1	7.59784e-10	0.253139	0.59	0.238	1.3515e-05
ANLN	7.75078e-10	0.409879	0.41	0.141	1.37871e-05
FRMD6	7.76485e-10	0.253032	0.492	0.181	1.38121e-05
H2AFJ	7.96026e-10	0.283502	0.59	0.266	1.41597e-05
SOX4	8.13655e-10	0.453687	0.967	0.956	1.44733e-05
DIAPH3	8.20096e-10	0.254876	0.475	0.167	1.45879e-05
SET	8.41247e-10	0.381809	1	0.984	1.49641e-05
MPZL1	8.86582e-10	0.404225	0.803	0.531	1.57705e-05
LHFP	8.97777e-10	0.503242	0.869	0.665	1.59697e-05
NCL	9.35558e-10	0.35145	0.967	0.916	1.66417e-05
SEMA3A	9.493e-10	0.462086	0.902	0.657	1.68862e-05
CASP6	9.53637e-10	0.381149	0.689	0.386	1.69633e-05
MYDGF	9.99158e-10	0.343045	0.525	0.216	1.7773e-05
GAS5	1.24708e-09	0.400306	0.951	0.773	2.2183e-05
SYNCRIP	1.28906e-09	0.422213	0.902	0.806	2.29298e-05
RRBP1	1.30958e-09	0.306589	0.721	0.386	2.32949e-05
LEPROT	1.4211e-09	0.403538	0.934	0.807	2.52785e-05
PAPSS1	1.44368e-09	0.28986	0.787	0.465	2.56803e-05
PTGDS	1.47261e-09	1.1126	0.475	0.194	2.61948e-05
EMP2	2.01417e-09	0.397167	0.934	0.777	3.58281e-05
FZD8	2.02606e-09	0.387474	0.705	0.368	3.60395e-05
TRA2B	2.10488e-09	0.358983	0.951	0.77	3.74417e-05
KHDRBS1	2.10784e-09	0.324251	0.984	0.921	3.74942e-05
EEF2	2.18897e-09	0.291954	1	0.998	3.89373e-05
JOSD1	2.31595e-09	0.325935	0.623	0.329	4.11962e-05
ITGB1	2.31922e-09	0.272112	0.984	0.972	4.12543e-05
OSBPL1A	2.56979e-09	0.389154	0.787	0.515	4.57114e-05
PRSS35	2.67458e-09	0.523186	0.836	0.55	4.75755e-05
PSMB1	3.01916e-09	0.334358	0.984	0.934	5.37048e-05
RCSD1	3.12898e-09	0.426584	0.852	0.59	5.56583e-05
AKAP12	3.40854e-09	0.40865	0.852	0.655	6.06311e-05
OAT	3.50353e-09	0.318127	0.689	0.382	6.23208e-05
HVCN1	3.65695e-09	0.310754	0.361	0.111	6.50498e-05
AMOTL2	3.93356e-09	0.647151	0.803	0.588	6.99702e-05
RHEB	4.08544e-09	0.328499	0.967	0.891	7.26717e-05
PTPN14	4.18993e-09	0.373299	0.787	0.555	7.45304e-05
CNPY2	4.36779e-09	0.383527	0.82	0.58	7.76942e-05
PLXNB1	4.42694e-09	0.297354	0.656	0.311	7.87463e-05
TYRO3	4.54673e-09	0.286169	0.672	0.352	8.08771e-05
C19orf48	4.78724e-09	0.27422	0.541	0.238	8.51554e-05
HCFC1R1	4.78825e-09	0.384822	0.721	0.436	8.51733e-05
ACOT7	4.83695e-09	0.296088	0.475	0.186	8.60397e-05
CNOT9	5.40253e-09	0.252827	0.443	0.175	9.61001e-05
PDLIM4	5.68458e-09	0.267582	0.557	0.251	0.000101117
SRSF3	5.69813e-09	0.387144	0.951	0.898	0.000101358
C6orf48	5.80507e-09	0.318991	0.967	0.899	0.000103261
BEX3	6.48788e-09	0.56485	0.803	0.534	0.000115406
ZNF207	6.83262e-09	0.376678	0.934	0.775	0.000121539
SRP72	7.30571e-09	0.373223	0.902	0.799	0.000129954
TMSB15A	7.74407e-09	0.291716	0.328	0.099	0.000137752
SUMO2	7.83526e-09	0.296075	0.967	0.948	0.000139374
TRIM28	7.85591e-09	0.302967	0.984	0.962	0.000139741
SURF6	8.31967e-09	0.31343	0.656	0.35	0.00014799
SKP2	8.53927e-09	0.380245	0.738	0.451	0.000151897
MIER3	9.00591e-09	0.275104	0.59	0.286	0.000160197
TKT	9.05464e-09	0.333512	0.705	0.411	0.000161064
TJP1	9.44784e-09	0.368182	0.852	0.731	0.000168058
SRSF11	1.01262e-08	0.293089	0.984	0.945	0.000180126
H2AFY2	1.05942e-08	0.316166	0.918	0.657	0.00018845
ALDH18A1	1.07716e-08	0.388762	0.623	0.327	0.000191605
RALGDS	1.1052e-08	0.320603	0.59	0.298	0.000196593
XRCC6	1.167e-08	0.297416	0.918	0.852	0.000207587
DCAF8	1.23721e-08	0.339503	0.836	0.67	0.000220075
FAM200B	1.29004e-08	0.376642	0.82	0.556	0.000229473
SNU13	1.30731e-08	0.365195	0.77	0.452	0.000232545
TMPO	1.32792e-08	0.462948	0.803	0.575	0.00023621
ZNF117	1.41653e-08	0.313308	0.705	0.401	0.000251973
PRAF2	1.41882e-08	0.382319	0.885	0.641	0.00025238
WASF1	1.4661e-08	0.441756	0.836	0.734	0.00026079
HDLBP	1.48812e-08	0.342912	0.967	0.943	0.000264707
TXNRD1	1.60304e-08	0.395421	0.852	0.703	0.000285149
LGALS3BP	1.63538e-08	0.380054	0.902	0.762	0.000290902
EIF3D	1.63592e-08	0.421136	0.934	0.806	0.000290997
GYPC	1.83246e-08	0.264892	0.607	0.293	0.000325959
IP6K2	1.90887e-08	0.369408	0.869	0.63	0.00033955
DYNC1I2	1.9714e-08	0.328586	0.951	0.848	0.000350672
MYL12A	2.10762e-08	0.371921	0.967	0.89	0.000374903
TUSC1	2.171e-08	0.301885	0.738	0.456	0.000386177
SHB	2.18959e-08	0.298593	0.525	0.243	0.000389485
KPNB1	2.19756e-08	0.357717	0.967	0.916	0.000390903
TUBA1A	2.21261e-08	0.504744	0.951	0.875	0.000393579
PCDH9	2.28689e-08	0.368596	0.59	0.292	0.000406791
PALM	2.56039e-08	0.371112	0.803	0.584	0.000455442
SPTLC2	2.86517e-08	0.25057	0.656	0.358	0.000509656
CXCR7	2.96509e-08	0.298558	0.197	0.042	0.00052743
CEBPD	3.11181e-08	0.455236	0.574	0.288	0.000553528
ZNF146	3.1147e-08	0.269807	0.82	0.565	0.000554043
GCN1	3.14257e-08	0.264225	0.557	0.267	0.000559001
SDC2	3.32375e-08	0.568935	0.82	0.669	0.000591229
PTRF	3.5356e-08	0.287958	0.803	0.522	0.000628913
CLMN	3.57595e-08	0.251793	0.279	0.078	0.00063609
NUS1	3.69863e-08	0.345456	0.82	0.539	0.000657912
SPTAN1	3.91483e-08	0.298069	0.967	0.889	0.000696369
NRBP2	4.34467e-08	0.33738	0.836	0.562	0.000772829
CDH11	4.40366e-08	0.363842	0.738	0.453	0.000783323
SRM	4.56204e-08	0.332864	0.738	0.478	0.000811496
RFTN1	4.74737e-08	0.382645	0.689	0.42	0.000844462
IMPACT	4.78446e-08	0.284444	0.656	0.381	0.000851059
CAPRIN1	4.84091e-08	0.329674	0.951	0.886	0.000861102
SNRPF	5.0076e-08	0.289575	0.738	0.455	0.000890752
KLF6	5.584e-08	0.342994	0.803	0.54	0.000993282
RAB31	5.67252e-08	0.388327	0.82	0.666	0.00100903
HNRNPR	5.70378e-08	0.357195	0.902	0.821	0.00101459
SCRN1	7.07597e-08	0.312773	0.951	0.809	0.00125867
MED28	7.30193e-08	0.336335	0.705	0.443	0.00129887
PIK3R2	7.62617e-08	0.366978	0.82	0.641	0.00135654
AXL	8.10262e-08	0.343107	0.902	0.681	0.00144129
CTXN1	8.11727e-08	0.305834	0.721	0.449	0.0014439
ANXA4	8.19417e-08	0.253613	0.607	0.326	0.00145758
PPIB	8.29508e-08	0.318542	0.82	0.669	0.00147553
C14orf166	8.88377e-08	0.321022	0.934	0.806	0.00158025
CPXM1	9.35793e-08	0.35018	0.754	0.515	0.00166459
TIMM23	9.63495e-08	0.363303	0.885	0.726	0.00171386
CLTA	1.13893e-07	0.334779	0.82	0.624	0.00202592
SNRPD2	1.18372e-07	0.303486	0.902	0.758	0.00210561
HNRNPA0	1.18547e-07	0.366059	0.934	0.854	0.00210872
SF3B6	1.25318e-07	0.258906	0.672	0.347	0.00222915
RUNX1T1	1.31206e-07	0.392925	0.918	0.803	0.00233389
SNRPE	1.38623e-07	0.382641	0.852	0.699	0.00246583
PLTP	1.41106e-07	0.400488	0.738	0.478	0.00250998
ENY2	1.42562e-07	0.362542	0.803	0.618	0.00253589
MAPK8	1.42741e-07	0.266364	0.541	0.247	0.00253908
P4HB	1.48834e-07	0.253962	0.951	0.838	0.00264746
TWSG1	1.48854e-07	0.297803	0.721	0.443	0.00264782
POLR1D	1.62842e-07	0.354269	0.885	0.611	0.00289663
SLC4A2	1.66246e-07	0.2925	0.77	0.531	0.00295719
NME1	1.82741e-07	0.306783	0.672	0.417	0.0032506
PHB2	1.83066e-07	0.305342	0.934	0.899	0.00325639
PXDN	1.85945e-07	0.381383	0.951	0.843	0.00330759
STT3B	1.8868e-07	0.324965	0.885	0.604	0.00335624
ILF2	1.90132e-07	0.29631	0.869	0.742	0.00338207
DDX1	1.96473e-07	0.311639	0.885	0.757	0.00349487
CYFIP1	1.99098e-07	0.32404	0.754	0.543	0.00354155
PATJ	2.1183e-07	0.257545	0.443	0.184	0.00376804
GNAI1	2.15744e-07	0.291547	0.623	0.326	0.00383766
ACTL6A	2.17778e-07	0.272172	0.607	0.349	0.00387384
SLC3A2	2.29865e-07	0.396274	0.77	0.537	0.00408883
SHFM1	2.46716e-07	0.296981	0.836	0.603	0.00438858
FAT3	2.56136e-07	0.308229	0.656	0.373	0.00455615
RTCB	2.62667e-07	0.285414	0.672	0.374	0.00467233
SRP9	2.77502e-07	0.286138	0.984	0.966	0.00493621
GOLGA8B	2.78143e-07	0.348928	0.803	0.656	0.0049476
ACTR2	3.06511e-07	0.361497	0.902	0.797	0.00545222
SPG20	3.15275e-07	0.318709	0.705	0.479	0.00560811
ANP32B	3.33083e-07	0.36099	0.918	0.87	0.00592488
APOE	3.41502e-07	0.361325	0.967	0.795	0.00607464
NPC2	3.41748e-07	0.33625	0.902	0.806	0.00607901
GCSH	3.47582e-07	0.254971	0.639	0.356	0.00618279
TCF3	3.63591e-07	0.250905	0.787	0.529	0.00646756
PTN	3.74109e-07	0.5297	0.787	0.599	0.00665466
IPO5	3.90559e-07	0.316694	0.902	0.787	0.00694726
HDAC2	4.24454e-07	0.33062	0.967	0.886	0.00755018
FZD4	5.13407e-07	0.272057	0.59	0.301	0.00913249
MBTPS1	5.20913e-07	0.323146	0.885	0.612	0.00926601
MRPS2	5.31041e-07	0.260555	0.754	0.507	0.00944616
GLTSCR2	5.4246e-07	0.314221	0.852	0.651	0.00964928
RGL1	5.56275e-07	0.252069	0.607	0.329	0.00989502
SFRP2	6.04051e-07	0.863175	0.443	0.228	0.0107449
PNRC2	6.48402e-07	0.362254	0.852	0.722	0.0115338
FAAP20	6.65543e-07	0.284392	0.59	0.308	0.0118387
SSR4	6.86188e-07	0.286094	0.869	0.712	0.0122059
SLC44A1	6.91476e-07	0.289288	0.623	0.392	0.0123
PLOD2	8.25196e-07	0.313383	0.902	0.697	0.0146786
KCTD3	8.47632e-07	0.325056	0.787	0.595	0.0150777
RCN2	8.49964e-07	0.406562	0.836	0.693	0.0151192
PSMA7	8.50484e-07	0.317929	0.967	0.879	0.0151284
ILF3	8.6506e-07	0.277928	0.967	0.87	0.0153877
SLC39A10	8.69619e-07	0.323271	0.803	0.59	0.0154688
PSMA2	8.70507e-07	0.269154	0.869	0.733	0.0154846
ARF4	9.49295e-07	0.27407	0.951	0.905	0.0168861
ADSL	9.55886e-07	0.292402	0.787	0.606	0.0170033
CNRIP1	9.70176e-07	0.319827	0.361	0.142	0.0172575
XRN2	9.86784e-07	0.275844	0.836	0.692	0.0175529
NENF	9.96224e-07	0.281616	0.492	0.241	0.0177208
MORF4L2	1.00113e-06	0.277547	0.951	0.867	0.0178081
FBL	1.09914e-06	0.309983	0.852	0.704	0.0195514
PFDN1	1.27777e-06	0.346587	0.836	0.676	0.022729
NRAS	1.35576e-06	0.285347	0.803	0.6	0.0241162
PCMTD2	1.44065e-06	0.394215	0.705	0.587	0.0256262
UBE2I	1.48527e-06	0.30485	0.918	0.758	0.0264201
TNKS1BP1	1.51846e-06	0.253786	0.738	0.474	0.0270103
RNA45S5	1.60071e-06	0.494611	0.672	0.404	0.0284734
EHMT2	1.62033e-06	0.310795	0.77	0.57	0.0288225
ROCK2	1.63428e-06	0.353166	0.82	0.609	0.0290706
SF3B1	1.70771e-06	0.274777	0.951	0.919	0.0303768
SMARCC1	1.80421e-06	0.325722	0.82	0.733	0.0320932
RCC2	1.82777e-06	0.35981	0.787	0.588	0.0325124
SNRPD1	1.9202e-06	0.341885	0.689	0.479	0.0341565
IGF1R	1.92491e-06	0.316022	0.852	0.711	0.0342403
ACP1	1.94741e-06	0.32076	0.869	0.777	0.0346405
SOWAHC	1.9514e-06	0.258234	0.525	0.257	0.0347116
UFD1L	2.13936e-06	0.253243	0.623	0.357	0.0380549
CSPP1	2.14853e-06	0.261586	0.607	0.341	0.0382181
PPRC1	2.21845e-06	0.28985	0.557	0.31	0.0394618
AHNAK	2.24217e-06	0.429878	0.934	0.791	0.0398837
GAS6	2.38916e-06	0.275765	0.852	0.641	0.0424983
TOMM7	2.43814e-06	0.295347	0.934	0.843	0.0433697
CAP1	2.44371e-06	0.268195	0.934	0.79	0.0434687
MAT2B	2.56807e-06	0.268146	0.738	0.526	0.0456808
HBEGF	2.58061e-06	0.281053	0.426	0.191	0.0459038
ANAPC5	2.58914e-06	0.323778	0.869	0.775	0.0460556
PSMG1	2.59866e-06	0.299789	0.639	0.366	0.046225
TIA1	2.62478e-06	0.320743	0.885	0.845	0.0466896
LMO4	2.6396e-06	0.420657	0.984	0.892	0.0469531
SPINT2	2.71015e-06	0.329017	0.951	0.939	0.0482082
ZNF106	2.89788e-06	0.325512	0.672	0.392	0.0515475
ZNHIT1	2.91245e-06	0.292677	0.836	0.694	0.0518067
NCK2	2.9441e-06	0.266788	0.672	0.449	0.0523697
NLGN2	3.02956e-06	0.260338	0.787	0.551	0.0538898
PSMA5	3.08643e-06	0.32503	0.918	0.839	0.0549013
TRMT112	3.31264e-06	0.265195	0.902	0.83	0.0589253
TMED5	3.33707e-06	0.305021	0.705	0.526	0.0593597
KARS	3.44197e-06	0.256161	0.82	0.69	0.0612258
SRSF2	3.46417e-06	0.361089	0.951	0.917	0.0616206
CLEC11A	3.54899e-06	0.28154	0.41	0.179	0.0631295
BCLAF1	3.5623e-06	0.328631	0.902	0.799	0.0633662
ZNF706	3.58578e-06	0.307314	0.738	0.533	0.0637839
DAB2	3.68149e-06	0.300319	0.508	0.255	0.0654864
PRRC1	3.81628e-06	0.271599	0.754	0.571	0.0678839
CCNL2	3.89365e-06	0.300804	0.869	0.802	0.0692603
FBLN1	4.05307e-06	0.289339	0.574	0.319	0.072096
TCF12	4.35096e-06	0.250279	0.77	0.557	0.0773949
CALR	4.55166e-06	0.258683	0.951	0.86	0.080965
PPA1	4.56931e-06	0.290906	0.574	0.375	0.0812789
ARHGAP32	4.75014e-06	0.291996	0.639	0.373	0.0844955
CREG1	4.82318e-06	0.289652	0.738	0.539	0.0857947
ERBIN	4.86095e-06	0.287807	0.639	0.379	0.0864665
HNRNPM	4.91502e-06	0.254751	0.951	0.812	0.0874284
PTOV1	4.92927e-06	0.252022	0.951	0.862	0.0876818
NDN	5.22774e-06	0.272356	0.934	0.776	0.0929911
MESDC2	5.29375e-06	0.303369	0.754	0.565	0.0941651
BRD3	5.37598e-06	0.281005	0.787	0.547	0.095628
MAGED1	5.71812e-06	0.261046	0.951	0.971	0.101714
ULK2	5.77121e-06	0.251631	0.672	0.404	0.102658
SACS	5.91332e-06	0.313412	0.738	0.539	0.105186
STRBP	5.97602e-06	0.270369	0.738	0.52	0.106302
FUS	6.12512e-06	0.257808	0.934	0.849	0.108954
ADAR	6.30273e-06	0.259035	0.852	0.726	0.112113
NOP56	6.5293e-06	0.29772	0.836	0.695	0.116143
DSG2	6.60716e-06	0.293705	0.836	0.714	0.117528
BEX2	6.7608e-06	0.316236	0.607	0.386	0.120261
MLXIP	6.89322e-06	0.250792	0.672	0.395	0.122617
TTC17	6.91182e-06	0.288168	0.836	0.703	0.122947
SSR1	7.32297e-06	0.278927	0.836	0.744	0.130261
DNAJB6	7.32748e-06	0.261214	0.934	0.819	0.130341
ELOVL5	7.53609e-06	0.283866	0.787	0.579	0.134052
TNPO1	7.57122e-06	0.273957	0.918	0.785	0.134677
NUAK1	7.88682e-06	0.280295	0.557	0.345	0.140291
PPP4R3B	8.83002e-06	0.286462	0.557	0.301	0.157068
RPL22L1	8.93905e-06	0.294859	0.607	0.373	0.159008
TLN1	9.36882e-06	0.304087	0.967	0.854	0.166653
RARA	9.51465e-06	0.258025	0.557	0.303	0.169247
EIF2AK4	9.81496e-06	0.324334	0.754	0.58	0.174589
ZNF503	9.95522e-06	0.426134	0.689	0.438	0.177083
CCT5	1.0062e-05	0.27039	0.885	0.803	0.178982
ARPC3	1.07651e-05	0.279572	0.885	0.78	0.191489
CAB39L	1.08291e-05	0.297533	0.443	0.227	0.192628
LYST	1.09491e-05	0.370255	0.426	0.225	0.194763
HNRNPUL1	1.1062e-05	0.25102	0.934	0.928	0.19677
DAP	1.10927e-05	0.286871	0.836	0.667	0.197317
CUL1	1.12622e-05	0.328209	0.852	0.722	0.200332
TARDBP	1.13791e-05	0.252503	0.77	0.57	0.202411
PSIP1	1.17639e-05	0.29898	0.869	0.729	0.209257
SAR1A	1.2082e-05	0.29566	0.77	0.645	0.214914
ARID4B	1.28363e-05	0.326262	0.82	0.679	0.228331
DDR1	1.29062e-05	0.274513	0.803	0.649	0.229575
TNS1	1.31567e-05	0.303223	0.689	0.462	0.234032
PLPP3	1.34456e-05	0.479896	0.541	0.317	0.23917
COL21A1	1.36342e-05	0.252431	0.492	0.24	0.242525
EAPP	1.39765e-05	0.2672	0.656	0.41	0.248613
CERS6	1.45883e-05	0.25949	0.672	0.426	0.259497
GLUL	1.47633e-05	0.27304	0.852	0.734	0.262609
DNTTIP2	1.48824e-05	0.272288	0.721	0.504	0.264728
HSPA5	1.48864e-05	0.343731	0.984	0.958	0.264799
RABGGTB	1.58161e-05	0.250565	0.754	0.586	0.281338
ANKRD50	1.59626e-05	0.473777	0.787	0.601	0.283942
DDX52	1.59872e-05	0.309542	0.672	0.485	0.28438
CLNS1A	1.68307e-05	0.322621	0.836	0.733	0.299384
HCN4	1.69967e-05	0.255121	0.885	0.699	0.302337
USP13	1.82363e-05	0.268972	0.836	0.673	0.324387
BTF3L4	2.0343e-05	0.291168	0.902	0.799	0.361862
AKT3	2.03991e-05	0.325311	0.787	0.596	0.36286
ZMYND8	2.1443e-05	0.280444	0.803	0.623	0.381428
BIN1	2.17474e-05	0.25673	0.689	0.441	0.386843
KMT2A	2.20908e-05	0.361306	0.623	0.4	0.392951
NSA2	2.31913e-05	0.300317	0.836	0.743	0.412528
AQP1	2.34794e-05	0.439755	0.557	0.372	0.417651
HSPH1	2.37355e-05	0.282298	0.738	0.555	0.422207
RAP1B	2.38265e-05	0.29518	0.82	0.659	0.423825
DNM1	2.51923e-05	0.322021	0.574	0.363	0.448122
SNHG8	2.53464e-05	0.265261	0.754	0.538	0.450861
ABCE1	2.57801e-05	0.281898	0.754	0.619	0.458576
DHX15	2.66017e-05	0.27503	0.836	0.75	0.473191
OLA1	2.80408e-05	0.258985	0.869	0.862	0.498791
FEZ2	2.90538e-05	0.293807	0.689	0.52	0.516809
PBX3	3.01118e-05	0.515806	0.836	0.742	0.535628
NACA	3.03505e-05	0.266673	0.934	0.912	0.539875
HMGA1	3.10352e-05	0.257076	0.918	0.788	0.552055
JUP	3.19789e-05	0.259351	0.902	0.877	0.568841
DDX21	3.59164e-05	0.281696	0.836	0.705	0.63888
ELP2	3.73548e-05	0.277835	0.672	0.462	0.664466
SNX5	3.88289e-05	0.254601	0.836	0.7	0.690688
EIF3J	3.92907e-05	0.25172	0.82	0.67	0.698904
SEC63	4.04151e-05	0.303435	0.77	0.717	0.718903
DNPH1	4.42251e-05	0.255352	0.656	0.444	0.786677
COPB1	4.44477e-05	0.266644	0.885	0.808	0.790636
OSBPL9	5.34551e-05	0.397586	0.836	0.822	0.950859
GNB4	5.47676e-05	0.418244	0.639	0.473	0.974206
YTHDF2	5.67319e-05	0.27552	0.885	0.793	1
CSRP1	6.066e-05	0.268009	0.885	0.82	1
IGF2BP3	6.07174e-05	0.26008	0.787	0.63	1
XRCC5	6.92915e-05	0.322797	0.951	0.933	1
GNAQ	7.05911e-05	0.339027	0.607	0.413	1
CTNNA1	7.26622e-05	0.25924	0.934	0.892	1
TMEM263	7.97271e-05	0.260041	0.639	0.375	1
PTPN11	8.2878e-05	0.268762	0.869	0.714	1
NOP58	8.45006e-05	0.250796	0.721	0.602	1
PRKDC	8.81103e-05	0.287931	0.869	0.754	1
CDK2AP1	8.89468e-05	0.272605	0.869	0.797	1
VANGL2	9.1461e-05	0.252237	0.492	0.276	1
LOC101928103	9.53412e-05	0.271869	0.623	0.397	1
MLLT4	9.6854e-05	0.260085	0.869	0.811	1
DCTD	0.000104465	0.30276	0.689	0.654	1
ZKSCAN1	0.000106624	0.274138	0.852	0.764	1
BAZ1A	0.000114435	0.290901	0.672	0.477	1
TMEM261	0.000117502	0.264998	0.689	0.428	1
CELF2	0.000122034	0.333698	0.836	0.783	1
MTDH	0.000123936	0.262059	0.918	0.842	1
C1orf122	0.000126017	0.259905	0.803	0.712	1
EML4	0.000127961	0.26024	0.803	0.707	1
DNAJC15	0.000137236	0.259316	0.918	0.849	1
C19orf43	0.000141362	0.254304	0.885	0.758	1
CAND1	0.000144307	0.262963	0.852	0.748	1
PPP3CB	0.000153058	0.259922	0.787	0.585	1
KDM1A	0.000153233	0.269854	0.721	0.575	1
HIST1H4C	0.000160999	0.385298	0.459	0.282	1
PTDSS1	0.000180734	0.257587	0.82	0.638	1
SELENBP1	0.00018689	0.258126	0.525	0.329	1
NEK7	0.000227265	0.305737	0.918	0.819	1
AEBP1	0.000234531	0.330229	0.77	0.681	1
DCTN6	0.000260145	0.276462	0.754	0.565	1
NLN	0.000276678	0.294207	0.639	0.47	1
TCERG1	0.000276712	0.255292	0.869	0.769	1
CKS1B	0.000285069	0.276656	0.672	0.505	1
SRP19	0.000300088	0.253508	0.689	0.568	1
TMEM50A	0.000302688	0.256987	0.869	0.811	1
DICER1	0.000322441	0.253138	0.836	0.738	1
ANKRD11	0.000350888	0.250329	0.869	0.842	1
UBR4	0.000356887	0.261293	0.902	0.862	1
MYO1C	0.000380542	0.265294	0.77	0.675	1
PEA15	0.000388328	0.261378	0.885	0.861	1
DNAJA1	0.000411391	0.282786	0.885	0.81	1
CST3	0.000577298	0.263785	0.82	0.748	1
HOPX	0.000624372	0.264795	0.393	0.213	1
SLC1A3	0.000647223	0.276	0.623	0.476	1
PAICS	0.000774855	0.265823	0.852	0.681	1
STAM	0.000869749	0.255261	0.557	0.394	1
PDS5A	0.000939208	0.260927	0.754	0.633	1
SPDL1	0.00108966	0.268088	0.393	0.243	1
MPV17	0.00109025	0.257446	0.787	0.606	1
SLIT3	0.00115044	0.25137	0.934	0.844	1
AKR7A2	0.00117065	0.259592	0.672	0.492	1
ST3GAL1	0.00203119	0.271376	0.836	0.771	1
SMC2	0.00234397	0.266848	0.508	0.372	1
ID2	0.0029461	0.367473	0.902	0.884	1
TUBA1C	0.00299083	0.285348	0.541	0.398	1
SH3BP4	0.00341135	0.250773	0.738	0.648	1
MTHFD1L	0.00345764	0.274989	0.492	0.363	1
ITSN1	0.00594145	0.265425	0.754	0.723	1
CENPF	0.0129125	0.369099	0.23	0.124	1
FAR2P2	0.0137707	0.266869	0.311	0.19	1
TUBA1B	0.0144715	0.477987	0.984	0.981	1
TMEM66	0.0254196	0.561088	0.197	0.425	1
H2AFZ	0.0314947	0.286901	0.869	0.819	1
C1orf63	0.690519	0.409421	0.197	0.265	1
CBS	0.737695	0.277956	0.197	0.209	1

## Sheet: cluster 9
	p_val	avg_logFC	pct.1	pct.2	p_val_adj
ERCC-00004	6.73034e-48	1.42791	1	1	1.19719e-43		as shown in Figure S2
ERCC-00002	7.07898e-48	1.45746	1	1	1.25921e-43
ERCC-00096	1.16156e-47	1.45958	1	1	2.06617e-43
ERCC-00074	1.3084e-47	1.45064	1	1	2.32739e-43
ERCC-00130	3.21768e-47	1.44078	1	1	5.7236e-43
ERCC-00171	3.5087e-47	1.43072	1	0.999	6.24128e-43
ERCC-00113	2.34688e-46	1.45636	1	0.999	4.17463e-42
ERCC-00046	2.90137e-46	1.37022	1	1	5.16096e-42
ERCC-00003	5.28704e-39	1.42556	0.974	0.978	9.40459e-35
ERCC-00042	1.63461e-38	1.20807	1	0.986	2.90765e-34
ERCC-00009	4.60152e-38	1.35679	1	0.987	8.18518e-34
ERCC-00145	1.20718e-35	1.20829	0.987	0.929	2.14734e-31
ERCC-00060	6.51049e-35	1.27263	0.974	0.974	1.15809e-30
ERCC-00111	2.09989e-34	1.22868	0.962	0.95	3.73528e-30
ERCC-00108	8.09873e-34	1.30156	0.962	0.988	1.4406e-29
ERCC-00043	4.17736e-32	1.15343	0.936	0.877	7.43068e-28
ERCC-00136	4.07327e-26	1.06553	0.897	0.947	7.24553e-22
ERCC-00076	2.63636e-21	1.05619	0.821	0.71	4.68955e-17
ERCC-00092	2.5342e-20	0.847225	0.808	0.669	4.50783e-16
ERCC-00022	1.91929e-14	1.04489	0.744	0.735	3.41404e-10
ERCC-00095	7.73751e-13	0.946444	0.705	0.619	1.37635e-08
NDUFA4	1.05022e-09	0.459239	0.987	0.993	1.86813e-05
ZNF471	1.10102e-09	1.01598	0.141	0.624	1.95849e-05
KCNQ1OT1	1.38636e-09	1.64397	0.731	0.983	2.46606e-05
TSIX	8.27429e-09	0.323321	0.167	0.618	0.000147183
MT-TK	8.69943e-09	0.796403	0.218	0.722	0.000154745
COX7C	1.92473e-08	0.427349	0.949	0.992	0.000342372
ERCC-00035	2.70904e-08	0.913926	0.538	0.412	0.000481885
MAB21L3	8.34479e-08	1.50901	0.308	0.794	0.00148437
CFLAR	1.38764e-07	0.60551	0.372	0.873	0.00246833
USP33	1.73097e-07	0.784995	0.282	0.769	0.00307905
UGDH-AS1	3.80539e-07	1.82989	0.256	0.698	0.00676903
LOC100131257	3.91256e-07	1.67496	0.449	0.919	0.00695966
ERCC-00162	7.44599e-07	0.773989	0.551	0.493	0.0132449
TNNC1	9.55294e-07	0.681888	0.833	0.854	0.0169928
COX7B	2.0465e-06	0.454092	0.859	0.964	0.0364032
ERCC-00116	2.11239e-06	0.665762	0.538	0.461	0.0375752
TNNI1	6.84644e-06	0.322394	0.974	0.982	0.121784
RPL41	7.12545e-06	0.269181	1	1	0.126747
CCDC144B	8.23863e-06	1.24974	0.192	0.577	0.146549
F5	8.25038e-06	1.12329	0.167	0.529	0.146758
ZNF37A	1.10607e-05	0.264012	0.179	0.546	0.196748
SEPW1	1.40526e-05	0.359319	0.91	0.971	0.249968
ERCC-00112	1.50369e-05	0.65189	0.5	0.428	0.267477
ERCC-00044	2.09104e-05	0.719516	0.5	0.433	0.371955
MT-TI	2.64825e-05	0.357253	0.167	0.505	0.47107
ZNF480	5.09758e-05	0.629443	0.256	0.657	0.906758
PGM5P2	5.18924e-05	0.873937	0.154	0.417	0.923063
TMEM212	5.25685e-05	1.10172	0.231	0.625	0.935089
ANKRD20A9P	5.43694e-05	0.335538	0.308	0.763	0.967123
PLN	7.25395e-05	0.568809	0.769	0.773	1
ATP5J	8.77669e-05	0.328354	0.859	0.978	1
FER	8.81683e-05	0.391067	0.167	0.466	1
ODF2L	0.000111648	0.96928	0.256	0.656	1
DDHD1	0.000144815	0.501241	0.205	0.541	1
ATP5G3	0.000167435	0.341308	0.936	0.989	1
RPS20	0.000210826	0.297873	0.949	0.998	1
LOC101929486	0.000281288	0.60433	0.103	0.333	1
LOC729348	0.000287035	0.998208	0.141	0.396	1
GHET1	0.000338522	0.510651	0.09	0.309	1
LINC00504	0.000395743	0.998792	0.192	0.452	1
MYL3	0.000399732	0.6926	0.628	0.585	1
ROR1-AS1	0.000451938	0.603054	0.051	0.237	1
LOC55338	0.000466388	0.57337	0.115	0.345	1
COX6C	0.000494434	0.320882	0.808	0.966	1
LOC101928118	0.000555864	0.37809	0.051	0.232	1
SP100	0.000668618	0.802974	0.141	0.395	1
ERCC-00131	0.000779125	0.639975	0.462	0.44	1
MYOZ2	0.000784099	0.578718	0.667	0.711	1
LOC101926889	0.00102021	0.79355	0.103	0.302	1
ERCC-00165	0.00115247	0.569071	0.372	0.298	1
ACTC1	0.00118018	0.289388	1	1	1
ALDOA	0.00130711	0.320264	0.872	0.984	1
HCG18	0.00137643	0.514931	0.179	0.448	1
CHCHD10	0.00138342	0.369138	0.731	0.879	1
GAPDH	0.00156066	0.32325	0.987	1	1
RPS27	0.00182339	0.26299	0.923	0.998	1
COX6B1	0.00194654	0.266364	0.795	0.962	1
CTSC	0.00221194	0.259174	0.256	0.582	1
LOC101929415	0.00242584	0.472722	0.038	0.179	1
POTEM	0.00350168	0.486515	0.103	0.285	1
LOC643406	0.00400009	0.76931	0.167	0.398	1
LOC101928936	0.00491558	0.726069	0.064	0.21	1
ZNF37BP	0.00516489	0.51667	0.205	0.458	1
RPL27	0.00639953	0.250237	0.872	0.992	1
COX5A	0.00640263	0.323443	0.808	0.96	1
LOC101928103	0.00729286	0.836826	0.192	0.41	1
PCBP2	0.00771335	0.291651	0.782	0.983	1
CKM	0.00869931	0.352399	0.718	0.769	1
ERCC-00071	0.0103145	0.587365	0.397	0.381	1
MYL4	0.0118976	0.341615	0.821	0.841	1
XAF1	0.0135368	1.41238	0.282	0.587	1
SNRNP25	0.0136327	0.256593	0.192	0.411	1
ZNF829	0.0158845	0.253607	0.103	0.249	1
LOC101926898	0.0161849	0.628387	0.077	0.205	1
ERCC-00062	0.0168096	0.654683	0.385	0.371	1
NEK11	0.0169488	0.367041	0.051	0.16	1
MT-TS2	0.0171813	0.28645	0.128	0.293	1
LINC00368	0.0173197	0.633916	0.115	0.261	1
ERCC-00051	0.0175002	0.489566	0.295	0.241	1
ERCC-00099	0.018663	0.480115	0.192	0.122	1
LOC729987	0.0187646	0.602379	0.103	0.244	1
SNHG16	0.0192736	0.336633	0.769	0.952	1
LOC100129434	0.0213987	0.583926	0.103	0.237	1
ERCC-00148	0.0215039	0.356251	0.141	0.078	1
ERCC-00079	0.0220607	0.580808	0.333	0.301	1
LOC102724434	0.0226162	0.458376	0.09	0.217	1
ACOT13	0.0257412	0.348513	0.628	0.812	1
ATP5J2	0.0275513	0.282499	0.705	0.944	1
LOC101927973	0.0302233	0.277764	0.051	0.146	1
LOC642236	0.0309623	0.621443	0.128	0.272	1
NDUFC1	0.031757	0.314305	0.667	0.889	1
C14orf2	0.0353967	0.376193	0.667	0.923	1
ADH4	0.0362689	0.352979	0.103	0.228	1
LINC00670	0.036797	0.29597	0.077	0.185	1
MT-TD	0.0415244	0.305519	0.051	0.14	1
LINC00506	0.0420201	0.483846	0.064	0.16	1
KLHDC3	0.0436907	0.34045	0.756	0.94	1
TPTE2P1	0.0446241	0.340787	0.128	0.262	1
RPS21	0.0520389	0.250297	0.744	0.959	1
HSPB7	0.0570539	0.294632	0.846	0.888	1
DISC1-IT1	0.0674842	0.48149	0.064	0.149	1
ERCC-00084	0.068171	0.49413	0.244	0.203	1
KIF18A	0.0681932	0.256568	0.051	0.128	1
LOC286437	0.0857302	0.334409	0.167	0.308	1
GNG5	0.0862088	0.275904	0.782	0.98	1
SMPX	0.0975719	0.270551	0.679	0.779	1
ARHGEF26-AS1	0.103653	0.328126	0.154	0.282	1
SKP1	0.114452	0.266502	0.718	0.959	1
BEX3	0.119856	0.259319	0.564	0.548	1
CDKN1A	0.133641	0.278632	0.231	0.38	1
LINC01420	0.148181	0.260063	0.218	0.372	1
LOC105372751	0.157659	0.598151	0.064	0.127	1
NDUFA3	0.184796	0.272713	0.654	0.909	1
EHD4	0.187878	0.254873	0.244	0.412	1
UG0898H09	0.196314	0.289945	0.115	0.194	1
AK4	0.204183	0.369245	0.244	0.412	1
YBX1	0.208367	0.260367	0.872	0.993	1
ARPC4	0.211494	0.295076	0.372	0.658	1
C12orf75	0.221577	0.330102	0.359	0.564	1
RAD21-AS1	0.222897	0.463596	0.115	0.192	1
GTF2H5	0.279521	0.266234	0.423	0.762	1
ASTN2	0.295739	0.683864	0.141	0.221	1
OST4	0.297209	0.254096	0.628	0.921	1
MARK4	0.301874	0.282962	0.423	0.733	1
SOD2	0.345151	0.258704	0.551	0.756	1
ERCC-00053	0.347162	0.550262	0.295	0.336	1
PRKAG2	0.358107	0.251167	0.321	0.519	1
ERCC-00025	0.365755	0.493861	0.282	0.318	1
NXNL2	0.368559	0.361296	0.09	0.137	1
ZNF428	0.39706	0.287416	0.308	0.495	1
HAMP	0.412615	0.537267	0.167	0.149	1
MRPL34	0.415225	0.327178	0.449	0.76	1
NDUFA12	0.422389	0.28033	0.615	0.884	1
RPS17	0.434475	0.255544	0.5	0.535	1
MB	0.446659	0.503631	0.436	0.527	1
BNIP3	0.4885	0.326349	0.551	0.855	1
FAM96A	0.502875	0.253534	0.423	0.707	1
C17orf76-AS1	0.53641	0.2803	0.308	0.436	1
MT-TM	0.605608	0.916328	0.385	0.634	1
HSPE1	0.618908	0.321176	0.59	0.883	1
ABRA	0.620592	0.289619	0.179	0.232	1
NPPA	0.631026	0.890277	0.192	0.252	1
TOMM6	0.64959	0.266037	0.577	0.893	1
RXRG	0.658086	0.257128	0.179	0.237	1
FAM162A	0.743801	0.315465	0.5	0.788	1
SBF2-AS1	0.750435	0.517288	0.167	0.18	1
BANCR	0.760429	0.328329	0.103	0.125	1
TRH	0.784384	0.493193	0.321	0.413	1
XRCC2	0.79984	0.55106	0.154	0.194	1
COX6A2	0.799945	0.396292	0.244	0.294	1
POLR2L	0.801764	0.258146	0.513	0.842	1
FKBP8	0.820795	0.338199	0.436	0.713	1
MT-TL2	0.823555	0.448838	0.115	0.121	1
LOC100506023	0.859849	0.420762	0.115	0.138	1
ESRG	0.870821	0.730963	0.154	0.189	1
SNHG18	0.891569	0.323134	0.205	0.242	1
UBE2A	0.909314	0.278813	0.423	0.664	1
ATPIF1	0.910947	0.317062	0.564	0.897	1
GYG1	0.938134	0.272223	0.487	0.746	1

[truncated: 2 more sheets: cluster 10, cluster 11]
