# Supplementary material for: A single cell transcriptional roadmap of human pacemaker cell differentiation
Source: eLife. 2022 Oct 11;11:e76781. doi: 10.7554/eLife.76781 (PMC9553210; doi:10.7554/eLife.76781)
Supplement: Supplementary file 2. — Related to Figure 4 and Figure 4—figure supplement 1. [file elife-76781-supp2.xlsx]

## Sheet: cluster D0_1
	p_val	avg_logFC	pct.1	pct.2	p_val_adj
SOX2	0	1.9801	0.997	0.12	0		as shown in Figure 4
FEZF1	0	1.03873	0.787	0.049	0
CDH1	1.04771e-278	0.980851	0.9	0.113	1.97325e-274
SOX21	2.59213e-264	0.521002	0.542	0.017	4.88202e-260
LECT1	4.13764e-242	1.0693	0.865	0.129	7.79283e-238
KIF1A	4.12409e-236	0.93809	0.894	0.136	7.76731e-232
IRX2	5.23025e-235	1.15382	0.868	0.149	9.85065e-231
TMEM158	6.08212e-221	0.702554	0.742	0.092	1.14551e-216
SMPDL3B	5.21543e-219	0.725967	0.784	0.105	9.82274e-215
UCA1	2.00222e-209	1.00573	0.881	0.15	3.77097e-205
SYT6	5.20074e-205	0.731224	0.806	0.127	9.79507e-201
SCNN1A	8.35902e-204	0.631935	0.761	0.101	1.57434e-199
MAL2	3.45272e-203	0.653082	0.806	0.113	6.50285e-199
ZIC2	3.55964e-192	1.22436	0.961	0.253	6.70422e-188
AP1M2	1.34661e-188	0.827376	0.868	0.172	2.53621e-184
KIAA1244	2.6769e-183	0.629153	0.765	0.122	5.04167e-179
FZD5	3.64408e-182	0.97374	0.839	0.186	6.86326e-178
TTYH1	4.53583e-182	0.373421	0.535	0.043	8.54278e-178
ZSCAN10	9.56137e-180	0.768834	0.868	0.171	1.80079e-175
ALPL	1.2268e-176	0.793886	0.9	0.23	2.31056e-172
LOC100506013	2.38267e-169	0.570873	0.577	0.063	4.48752e-165
ESRP1	9.82118e-169	0.608677	0.774	0.133	1.84972e-164
CLU	5.2198e-168	1.27707	0.99	0.575	9.83097e-164
LIN28A	2.69243e-164	1.29449	0.997	0.704	5.07092e-160
DNMT3B	1.52067e-162	1.43133	0.984	0.451	2.86403e-158
CYP2S1	1.88764e-162	0.881834	0.871	0.23	3.55519e-158
ESRG	4.16349e-162	1.61314	0.994	0.385	7.84151e-158
PRODH	2.07076e-161	0.488646	0.632	0.091	3.90007e-157
MIAT	5.3965e-160	0.598827	0.655	0.099	1.01638e-155
DCLK1	5.39917e-158	0.39781	0.526	0.053	1.01688e-153
USP9X	8.86613e-157	1.35205	1	0.902	1.66985e-152
VAT1L	4.54702e-156	0.465167	0.555	0.066	8.56386e-152
FEZF1-AS1	5.39173e-155	0.398856	0.41	0.026	1.01548e-150
SFRP1	5.60843e-154	1.27144	1	0.917	1.05629e-149
CLDN7	1.75107e-153	0.476579	0.681	0.103	3.29797e-149
PPP2R2B	5.25303e-153	0.558621	0.694	0.123	9.89356e-149
CRABP1	2.0112e-152	0.860751	0.919	0.276	3.78789e-148
SIX3	2.25945e-152	0.902251	0.342	0.014	4.25545e-148
JAKMIP2-AS1	3.04156e-151	0.316017	0.442	0.034	5.72848e-147
GYLTL1B	1.84171e-150	0.404564	0.584	0.074	3.46868e-146
TOX3	2.38183e-150	0.367974	0.526	0.058	4.48593e-146
CD24	2.13993e-149	1.60131	0.997	0.758	4.03035e-145
IRX1	1.42743e-148	0.330919	0.387	0.023	2.68841e-144
RARRES2	5.71232e-148	0.560479	0.716	0.136	1.07586e-143
CLDN6	7.33312e-147	1.31714	0.99	0.677	1.38112e-142
FGFR1	2.97027e-145	1.18249	0.981	0.733	5.59421e-141
LOC100188947	2.26748e-144	1.22613	0.987	0.4	4.27056e-140
SCGB3A2	5.47757e-144	0.43627	0.565	0.075	1.03165e-139
AASS	2.077e-142	1.41472	0.981	0.75	3.91183e-138
FRAT2	7.481e-142	0.772703	0.881	0.32	1.40897e-137
SFRP2	1.10333e-139	0.765684	0.894	0.243	2.07802e-135
USP44	2.28158e-138	0.488057	0.661	0.116	4.29713e-134
JPH4	9.61735e-134	0.524927	0.7	0.134	1.81133e-129
LINC00698	1.59426e-133	0.295433	0.423	0.037	3.00263e-129
DPPA4	3.54931e-132	0.987835	0.981	0.527	6.68477e-128
SEMA6A	5.01266e-132	1.05326	0.981	0.594	9.44084e-128
PTPRZ1	9.42405e-131	0.693564	0.832	0.236	1.77493e-126
LOC100505817	9.9239e-130	0.45865	0.642	0.106	1.86907e-125
FLJ22184	1.79726e-129	0.419793	0.613	0.109	3.38496e-125
IDO1	6.80016e-129	0.373342	0.487	0.059	1.28074e-124
RPL13A	1.41453e-128	0.803463	1	0.959	2.66412e-124
FGF2	5.29651e-126	0.779305	0.845	0.303	9.97545e-122
UTF1	6.32112e-126	0.312581	0.413	0.038	1.19052e-121
FGFBP3	7.72439e-126	0.669185	0.719	0.179	1.45481e-121
MAP7	7.7336e-126	0.507191	0.71	0.163	1.45655e-121
VGLL3	1.67654e-125	0.295244	0.419	0.041	3.15759e-121
OTX2	2.83786e-124	0.809578	0.835	0.293	5.34482e-120
ZIC5	2.85701e-124	0.625641	0.713	0.176	5.38089e-120
BEND4	6.63299e-123	0.366684	0.532	0.08	1.24926e-118
SEL1L3	9.07464e-123	0.40081	0.584	0.1	1.70912e-118
CLDN3	2.39217e-122	0.303641	0.477	0.059	4.50542e-118
FAM60A	1.26694e-120	0.873492	0.984	0.87	2.38615e-116
RND2	6.40444e-120	0.800662	0.955	0.602	1.20621e-115
L1TD1	8.67288e-120	0.77847	0.89	0.312	1.63345e-115
RBFOX3	9.10183e-120	0.281001	0.455	0.053	1.71424e-115
LUZP2	1.38584e-118	0.304022	0.384	0.035	2.61009e-114
TCF7L1	1.58485e-117	0.855151	0.961	0.672	2.9849e-113
AUTS2	2.98141e-117	0.836323	0.948	0.575	5.61519e-113
TERF1	2.71138e-114	1.17474	0.981	0.798	5.10661e-110
DRD4	3.6635e-114	0.345362	0.484	0.071	6.89984e-110
LMO1	4.43938e-113	0.318765	0.2	0.002	8.36112e-109
DBNDD1	7.23739e-113	0.677095	0.858	0.326	1.36309e-108
IFITM1	3.98493e-112	0.924185	0.961	0.565	7.50522e-108
FBXL16	2.71459e-111	0.270073	0.435	0.053	5.11267e-107
PDPN	2.80226e-111	0.673292	0.8	0.271	5.27777e-107
EIF4B	6.37049e-110	0.61243	1	0.984	1.19982e-105
ENO2	1.98759e-109	0.711445	0.848	0.35	3.74343e-105
UGP2	2.61424e-109	0.975925	0.99	0.907	4.92366e-105
PODXL	7.74953e-108	1.00457	0.942	0.555	1.45955e-103
LITAF	3.7385e-107	0.868172	0.958	0.683	7.04108e-103
EPCAM	5.98865e-107	0.570452	0.781	0.224	1.1279e-102
RAB3B	2.68527e-104	0.706809	0.881	0.438	5.05744e-100
FOXO1	2.7159e-104	0.693083	0.784	0.281	5.11512e-100
PLA2G16	9.20892e-104	0.537102	0.69	0.201	1.73441e-99
NLGN4X	1.30865e-103	0.724982	0.855	0.35	2.46471e-99
PTMA	1.85012e-103	0.649598	1	0.986	3.48452e-99
POU5F1	3.02054e-103	0.43687	0.668	0.16	5.68888e-99
PHC1	6.07107e-102	0.740769	0.942	0.589	1.14343e-97
FAM46B	9.56904e-102	0.575969	0.713	0.222	1.80223e-97
HMGA1	4.41686e-101	0.75769	0.997	0.908	8.31871e-97
PSAT1	3.16186e-100	0.802751	0.994	0.707	5.95505e-96
TRIM22	7.67811e-100	0.298998	0.387	0.046	1.4461e-95
CXADR	7.03874e-99	0.707818	0.971	0.831	1.32568e-94
SALL4	1.09024e-98	0.688953	0.858	0.398	2.05336e-94
RARG	2.27255e-98	0.599739	0.79	0.314	4.28012e-94
LRRN1	9.99569e-97	0.598917	0.8	0.321	1.88259e-92
ITGA6	1.23362e-96	0.606529	0.835	0.344	2.32339e-92
MFGE8	1.76833e-96	0.828006	0.926	0.68	3.33048e-92
SLC7A8	2.02184e-96	0.475065	0.706	0.219	3.80793e-92
MYO10	1.1452e-95	0.6965	0.906	0.527	2.15687e-91
TCEA1	1.33343e-95	0.715601	0.984	0.88	2.51139e-91
PAICS	1.49183e-95	0.674876	0.994	0.855	2.8097e-91
IPW	2.07175e-95	0.727509	0.958	0.783	3.90193e-91
PAR-SN	2.61358e-95	0.744179	0.845	0.426	4.92241e-91
MICB	1.50188e-94	0.299989	0.465	0.081	2.82864e-90
HSP90AB1	1.3927e-93	0.4976	1	0.995	2.62301e-89
STMN3	1.3692e-92	0.501167	0.665	0.184	2.57876e-88
CBS	1.72399e-92	0.733295	0.99	0.715	3.24695e-88
DANCR	1.83424e-92	0.690743	0.974	0.837	3.4546e-88
GABRB3	2.10079e-92	0.464428	0.719	0.218	3.95663e-88
VRTN	4.8344e-89	0.47887	0.726	0.24	9.10512e-85
SLC29A1	4.2194e-87	0.606142	0.826	0.375	7.94683e-83
FEZ1	5.56302e-87	0.557786	0.819	0.35	1.04774e-82
WDHD1	1.60651e-86	0.669042	0.839	0.439	3.0257e-82
TRIM28	3.65305e-86	0.543965	1	0.97	6.88016e-82
YBX2	2.88451e-85	0.306645	0.494	0.102	5.43269e-81
ZIC3	5.07019e-85	0.484662	0.735	0.244	9.54919e-81
CPZ	5.45238e-84	0.373262	0.577	0.158	1.0269e-79
MED14	2.7319e-83	0.684524	0.823	0.476	5.14526e-79
RPL18A	5.80067e-83	0.447082	1	0.997	1.0925e-78
LINGO1	6.83634e-83	0.300989	0.535	0.125	1.28756e-78
SPINT1	8.59493e-83	0.369169	0.632	0.179	1.61877e-78
SET	1.70824e-82	0.506135	1	0.985	3.21731e-78
DMKN	2.89738e-82	0.622119	0.926	0.604	5.45692e-78
IFI30	7.37953e-82	0.379241	0.642	0.185	1.38986e-77
COX7C	3.33248e-81	0.483091	0.997	0.994	6.27639e-77
GPR176	5.2973e-81	0.445729	0.629	0.189	9.97693e-77
PTAR1	8.78928e-81	0.623661	0.91	0.651	1.65537e-76
FCHO1	2.95587e-80	0.283279	0.481	0.101	5.56709e-76
CDK2AP1	3.10976e-80	0.555662	0.994	0.897	5.85691e-76
CKB	3.76407e-80	0.643948	0.984	0.791	7.08926e-76
EPHX3	4.44244e-80	0.316037	0.539	0.131	8.36689e-76
PARP1	5.65717e-80	0.601915	0.968	0.817	1.06547e-75
LINC00263	8.04448e-80	0.500459	0.745	0.293	1.5151e-75
PIM2	1.47908e-79	0.343423	0.581	0.154	2.7857e-75
TMX1	1.85055e-79	0.559933	0.926	0.625	3.48532e-75
DDX21	1.90834e-79	0.621902	0.974	0.821	3.59416e-75
ASS1	5.48256e-79	0.586364	0.89	0.42	1.03259e-74
C19orf66	1.49697e-78	0.263716	0.423	0.077	2.81939e-74
TSPAN33	3.11092e-78	0.29103	0.481	0.105	5.8591e-74
FAM124A	3.48645e-78	0.311561	0.539	0.132	6.56638e-74
BCAT1	1.53628e-77	0.654166	0.977	0.821	2.89343e-73
ITPR3	1.77529e-77	0.263644	0.458	0.093	3.34357e-73
SNRPB	4.3042e-76	0.554242	0.987	0.887	8.10653e-72
SBK1	5.3433e-76	0.558779	0.874	0.49	1.00636e-71
PRR14L	1.058e-75	0.580505	0.884	0.641	1.99264e-71
HHLA2	1.13842e-75	0.364158	0.626	0.183	2.1441e-71
SERF2	1.59346e-75	0.447655	1	0.99	3.00113e-71
PSIP1	1.7756e-75	0.575307	0.971	0.844	3.34416e-71
RABGAP1L	2.12422e-75	0.64133	0.897	0.538	4.00076e-71
PRKX	4.45494e-75	0.585137	0.819	0.436	8.39043e-71
PAR5	4.96678e-75	0.46475	0.652	0.232	9.35442e-71
RGMA	6.44785e-75	0.283917	0.526	0.137	1.21439e-70
GPRC5B	6.56411e-75	0.378552	0.671	0.241	1.23628e-70
TRIM71	7.31134e-75	0.478755	0.739	0.328	1.37702e-70
CD9	1.9655e-74	0.38754	0.655	0.202	3.70181e-70
POLR3G	4.97795e-74	0.434783	0.687	0.242	9.37546e-70
TUBB2B	1.43562e-73	0.564501	0.952	0.515	2.70384e-69
JARID2	7.45955e-73	0.630312	0.945	0.703	1.40493e-68
GJA1	1.39591e-72	0.631963	0.971	0.627	2.62905e-68
NLN	2.06474e-72	0.541255	0.958	0.724	3.88874e-68
MT-ND5	4.18549e-72	0.528637	1	0.999	7.88295e-68
DPYSL3	5.84638e-72	0.6493	0.981	0.84	1.10111e-67
POU3F1	3.81272e-71	0.272214	0.335	0.051	7.18088e-67
LINC00617	6.67388e-71	0.367762	0.616	0.199	1.25696e-66
TUBB3	1.09724e-70	0.526994	0.835	0.412	2.06654e-66
RPS5	1.51786e-70	0.417012	1	0.992	2.85873e-66
HNRNPD	2.11415e-70	0.451851	1	0.982	3.98178e-66
HHLA3	3.51445e-70	0.523965	0.852	0.454	6.61912e-66
STOM	3.77158e-70	0.530868	0.703	0.306	7.1034e-66
PRELP	2.48036e-69	0.458833	0.739	0.294	4.67151e-65
RPL14	3.26301e-69	0.383419	1	0.993	6.14556e-65
GFPT2	1.15084e-68	0.509324	0.848	0.447	2.1675e-64
QSER1	1.19893e-68	0.607313	0.894	0.724	2.25807e-64
PPIA	2.64125e-68	0.376662	1	0.999	4.97453e-64
CNTNAP2	3.86742e-68	0.506647	0.935	0.487	7.2839e-64
ENO1	7.12487e-68	0.450625	1	0.99	1.3419e-63
GPR98	2.88304e-67	0.446244	0.677	0.276	5.42991e-63
LARP1	5.07335e-67	0.494759	0.99	0.94	9.55514e-63
FBXO2	9.19071e-67	0.293015	0.51	0.143	1.73098e-62
PRDM7	1.21671e-66	0.561078	0.739	0.366	2.29154e-62
HERC5	1.32028e-66	0.279068	0.458	0.113	2.48661e-62
PABPC1	1.47852e-66	0.489221	0.997	0.982	2.78464e-62
SALL2	2.5096e-66	0.546172	0.89	0.62	4.72658e-62
DIAPH2	1.21984e-65	0.511669	0.752	0.376	2.29745e-61
TMEM64	3.2464e-65	0.48249	0.687	0.313	6.11428e-61
HELLS	3.27343e-65	0.552745	0.852	0.487	6.16518e-61
ATCAY	3.88962e-65	0.277226	0.461	0.117	7.32572e-61
MAD2L2	1.09756e-64	0.510691	0.881	0.584	2.06714e-60
PRKDC	1.68908e-64	0.570564	0.984	0.882	3.18121e-60
MTA3	8.72954e-64	0.479346	0.803	0.493	1.64412e-59
MT-ND2	2.84499e-63	0.454997	1	1	5.35826e-59
RPS20	4.97587e-63	0.376454	1	0.999	9.37156e-59
ARRB2	5.41348e-63	0.426581	0.739	0.368	1.01957e-58
HLA-C	2.03784e-62	0.436884	0.748	0.358	3.83806e-58
SLC7A3	3.62442e-62	0.541008	0.845	0.438	6.82624e-58
ARF3	1.30597e-61	0.471111	0.974	0.849	2.45966e-57
MYO1E	1.85527e-61	0.341659	0.571	0.2	3.49421e-57
TRIM24	3.54433e-61	0.599237	0.926	0.812	6.6754e-57
CKS2	1.04569e-60	0.611792	0.939	0.641	1.96946e-56
LPHN2	1.16687e-60	0.531959	0.939	0.677	2.19769e-56
PMF1	1.3069e-60	0.489541	0.932	0.746	2.46141e-56
ZNF217	2.05069e-60	0.507044	0.868	0.624	3.86227e-56
RPS6	6.53723e-60	0.394027	1	0.997	1.23122e-55
TET1	8.39591e-60	0.547999	0.935	0.714	1.58129e-55
LPHN1	8.74517e-60	0.50647	0.829	0.518	1.64706e-55
CRABP2	8.55056e-59	0.453734	0.965	0.601	1.61041e-54
C1orf21	1.72138e-58	0.446228	0.874	0.563	3.24204e-54
IPO7	2.5278e-58	0.460185	0.974	0.889	4.76085e-54
NPM1	4.57875e-58	0.417119	1	0.986	8.62361e-54
NUFIP2	6.96505e-58	0.471985	0.948	0.834	1.3118e-53
SORL1	7.78245e-58	0.464399	0.826	0.43	1.46575e-53
PDLIM1	1.19843e-57	0.547307	0.961	0.827	2.25712e-53
SEPT3	2.03887e-57	0.287514	0.565	0.192	3.84001e-53
IGF2BP3	2.26377e-57	0.464846	0.929	0.776	4.26358e-53
GNPTAB	2.53432e-57	0.495669	0.723	0.406	4.77314e-53
HCFC1	2.85389e-57	0.485955	0.939	0.783	5.37501e-53
RTN3	3.86741e-57	0.446134	0.958	0.861	7.28387e-53
CELSR2	4.12179e-57	0.344517	0.639	0.265	7.76297e-53
SPINT2	4.60039e-57	0.476877	0.987	0.929	8.66437e-53
KIT	4.98252e-57	0.259811	0.494	0.144	9.38407e-53
F11R	5.35866e-57	0.401309	0.735	0.378	1.00925e-52
EI24	1.15537e-56	0.478778	0.958	0.873	2.17602e-52
TARS	1.73038e-56	0.537661	0.916	0.785	3.25899e-52
RIF1	3.58146e-56	0.521683	0.923	0.767	6.74533e-52
ALCAM	3.69652e-56	0.474666	0.755	0.398	6.96202e-52
GRIK5	1.04948e-55	0.281473	0.552	0.19	1.97658e-51
LPCAT1	1.09146e-55	0.461308	0.8	0.498	2.05565e-51
INSR	1.16252e-55	0.483906	0.787	0.482	2.18949e-51
ZFP36L2	1.44549e-55	0.546671	0.845	0.584	2.72243e-51
MT-ATP6	1.61671e-55	0.312558	1	1	3.04492e-51
PHF17	3.76803e-55	0.493006	0.868	0.575	7.09671e-51
TMSB4X	6.09075e-55	0.488404	0.997	0.916	1.14713e-50
TUBB	6.75546e-55	0.436146	1	0.988	1.27232e-50
RAP1GAP2	1.06243e-54	0.252511	0.471	0.139	2.00097e-50
LRPPRC	1.11316e-54	0.428246	0.952	0.875	2.09653e-50
SYT3	1.93755e-54	0.260712	0.432	0.116	3.64918e-50
HSPD1	2.86299e-54	0.391564	0.99	0.966	5.39215e-50
FBL	1.84636e-53	0.441646	0.971	0.858	3.47743e-49
INA	1.89413e-53	0.262793	0.442	0.121	3.5674e-49
SLC44A1	2.26097e-53	0.454047	0.835	0.607	4.25832e-49
DPYSL2	3.01348e-53	0.477342	0.906	0.741	5.67559e-49
LTA4H	3.05746e-53	0.42078	0.942	0.821	5.75843e-49
CCND1	3.09599e-53	0.509231	0.823	0.422	5.83098e-49
BPTF	5.54027e-53	0.45584	0.958	0.87	1.04345e-48
OLFM1	1.29858e-52	0.286743	0.503	0.153	2.44574e-48
GRB10	2.4238e-52	0.445635	0.735	0.399	4.56498e-48
USO1	2.72197e-52	0.442816	0.945	0.831	5.12656e-48
CSE1L	3.19909e-52	0.47229	0.984	0.842	6.02517e-48
RAB25	5.03613e-52	0.268405	0.484	0.152	9.48505e-48
SERPINB9	8.83653e-52	1.04021	0.852	0.681	1.66427e-47
ZNF770	1.21635e-51	0.480074	0.926	0.799	2.29087e-47
KCNQ2	1.83074e-51	0.256566	0.477	0.15	3.44802e-47
PPP1CC	3.34853e-51	0.410384	0.981	0.93	6.30662e-47
IGF2BP1	5.20956e-51	0.433322	0.981	0.909	9.81168e-47
KHSRP	6.60032e-51	0.428883	0.981	0.904	1.2431e-46
AGPAT5	7.78506e-51	0.429638	0.845	0.625	1.46624e-46
CCNG1	1.40241e-50	0.428989	0.99	0.92	2.64129e-46
KRAS	1.53982e-50	0.421533	0.923	0.774	2.9001e-46
VASH2	2.06266e-50	0.41772	0.71	0.361	3.88482e-46
PFN1	5.86492e-50	0.364539	1	0.995	1.1046e-45
GBP4	6.30626e-50	0.378608	0.706	0.328	1.18772e-45
RPL15	7.36922e-50	0.275677	1	0.999	1.38792e-45
FOXN3	8.73025e-50	0.451081	0.923	0.786	1.64425e-45
RPS15	1.78568e-49	0.348979	1	0.991	3.36314e-45
RPL41	2.70562e-49	0.286191	1	1	5.09577e-45
RPS25	3.0713e-49	0.300248	1	0.997	5.78448e-45
HDGF	3.33668e-49	0.393694	0.974	0.929	6.2843e-45
PYCARD	5.60897e-49	0.278131	0.445	0.134	1.05639e-44
NASP	8.22397e-49	0.456356	0.977	0.845	1.5489e-44
ILF3	8.31723e-49	0.379265	0.987	0.925	1.56647e-44
MT-ATP8	9.01303e-49	0.504439	0.997	0.996	1.69751e-44
XRCC5	1.34278e-48	0.364642	1	0.96	2.529e-44
GPC3	1.93164e-48	0.485934	0.765	0.433	3.63806e-44
FGD4	2.24113e-48	0.311672	0.535	0.206	4.22094e-44
FAM108B1	3.44435e-48	0.435195	0.745	0.46	6.4871e-44
THY1	3.77893e-48	0.252216	0.594	0.219	7.11724e-44
UBE2G1	4.31341e-48	0.422154	0.906	0.782	8.12387e-44
HSPE1	4.39786e-48	0.398613	0.987	0.922	8.28294e-44
CTSC	5.2164e-48	0.435483	0.913	0.743	9.82456e-44
PALM3	5.68163e-48	0.272964	0.455	0.149	1.07008e-43
SLC6A8	5.83761e-48	0.388121	0.671	0.347	1.09946e-43
NCAPG2	5.87376e-48	0.408291	0.716	0.404	1.10626e-43
GPC4	7.46609e-48	0.423213	0.768	0.456	1.40616e-43
PTBP1	1.25938e-47	0.41062	0.987	0.851	2.37191e-43
EIF3B	1.4992e-47	0.422726	0.939	0.827	2.82359e-43
MT-CO3	1.67805e-47	0.253932	1	1	3.16045e-43
RRAS2	1.96678e-47	0.424028	0.871	0.665	3.70424e-43
ACOT7	2.03778e-47	0.413171	0.826	0.547	3.83795e-43
UNG	2.19745e-47	0.420225	0.845	0.545	4.13867e-43
MTHFD2	3.22605e-47	0.393299	0.823	0.521	6.07594e-43
SEMA4D	3.39967e-47	0.260592	0.529	0.205	6.40294e-43
RPS27A	4.23698e-47	0.294984	1	0.998	7.97993e-43
MT-ND4	4.47723e-47	0.285018	1	1	8.43242e-43
STEAP2	4.96321e-47	0.28693	0.481	0.168	9.34771e-43
FAM222B	5.52662e-47	0.46453	0.887	0.714	1.04088e-42
TCF7L2	1.61104e-46	0.470266	0.897	0.763	3.03424e-42
MT-ND4L	2.1842e-46	0.522877	0.987	0.974	4.11372e-42
C1orf233	2.37054e-46	0.300984	0.568	0.227	4.46467e-42
RCC2	2.44012e-46	0.431699	0.948	0.773	4.59572e-42
PPAT	6.88096e-46	0.373415	0.797	0.513	1.29596e-41
CEBPZ	1.70723e-45	0.439019	0.835	0.659	3.21541e-41
PMAIP1	2.72441e-45	0.251428	0.403	0.116	5.13115e-41
PLP1	3.66591e-45	0.282729	0.51	0.189	6.90437e-41
MCM7	5.31108e-45	0.439884	0.961	0.732	1.00029e-40
LIN28B	7.97567e-45	0.419428	0.935	0.671	1.50214e-40
MCM2	1.14994e-44	0.421627	0.894	0.569	2.16579e-40
MCM4	1.48795e-44	0.485659	0.858	0.581	2.8024e-40
PITPNC1	1.87462e-44	0.281998	0.584	0.248	3.53066e-40
SRSF3	2.21576e-44	0.382445	0.987	0.945	4.17317e-40
TNRC6A	4.90966e-44	0.409852	0.91	0.768	9.24684e-40
CRMP1	9.84869e-44	0.33894	0.674	0.318	1.8549e-39
TTLL12	1.11679e-43	0.364417	0.771	0.487	2.10336e-39
FZD3	1.1432e-43	0.444435	0.865	0.685	2.1531e-39
TP53	1.35988e-43	0.363741	0.803	0.539	2.56119e-39
LARS	1.36881e-43	0.3749	0.932	0.784	2.57801e-39
SIRT1	2.91084e-43	0.396863	0.758	0.498	5.48229e-39
MT-CO2	3.27022e-43	0.279475	1	1	6.15913e-39
SLC7A1	3.96172e-43	0.356666	0.719	0.368	7.46151e-39
HPDL	4.49095e-43	0.255131	0.471	0.168	8.45826e-39
GIGYF1	9.60217e-43	0.412633	0.848	0.644	1.80847e-38
PMEL	3.51854e-42	0.39752	0.658	0.328	6.62682e-38
PROSER1	3.86472e-42	0.383511	0.8	0.595	7.27881e-38
SRM	4.76778e-42	0.361983	0.935	0.73	8.97965e-38
DUT	1.0465e-41	0.441455	0.929	0.746	1.97099e-37
SOX11	2.96169e-41	0.514996	0.842	0.663	5.57805e-37
C20orf27	3.35914e-41	0.367492	0.755	0.472	6.3266e-37
FKBP1A	3.64036e-41	0.333003	0.984	0.927	6.85626e-37
ADSS	5.62924e-41	0.352756	0.813	0.58	1.06021e-36
EEF2	7.47024e-41	0.330029	1	0.994	1.40694e-36
CBX5	9.67304e-41	0.374247	1	0.961	1.82182e-36
RPL12	1.01111e-40	0.302873	1	0.988	1.90432e-36
TGIF1	1.75768e-40	0.411524	0.842	0.573	3.31042e-36
RPS16	2.20848e-40	0.300557	1	0.991	4.15945e-36
BUB1	2.33235e-40	0.357968	0.674	0.348	4.39275e-36
SNHG5	2.66824e-40	0.381679	0.935	0.825	5.02535e-36
SLC25A39	3.06052e-40	0.364793	0.945	0.877	5.76418e-36
SUMO2	5.02879e-40	0.310637	0.99	0.965	9.47122e-36
HNRNPAB	5.05229e-40	0.357376	0.981	0.901	9.51548e-36
BUB1B	5.97499e-40	0.358914	0.748	0.395	1.12533e-35
NUCKS1	7.19261e-40	0.319766	0.994	0.978	1.35466e-35
SERBP1	8.09806e-40	0.288601	0.997	0.985	1.52519e-35
RPS13	1.79551e-39	0.270366	1	0.998	3.38166e-35
EIF1AX	2.3014e-39	0.348329	0.965	0.919	4.33446e-35
SLC39A10	2.34988e-39	0.388563	0.89	0.735	4.42577e-35
MCM5	3.40736e-39	0.415918	0.855	0.544	6.41742e-35
MYCN	3.50971e-39	0.412047	0.874	0.585	6.61019e-35
PTBP3	3.99023e-39	0.38058	0.874	0.706	7.51519e-35
TOMM20	5.38316e-39	0.333835	0.974	0.933	1.01386e-34
STRBP	6.84352e-39	0.422779	0.813	0.652	1.28891e-34
SS18L2	8.82059e-39	0.367044	0.79	0.538	1.66127e-34
IPO5	1.18412e-38	0.362034	0.968	0.884	2.23016e-34
SNHG16	1.28685e-38	0.330216	0.977	0.958	2.42365e-34
U2AF2	1.39643e-38	0.366029	0.903	0.765	2.63003e-34
OCLN	1.61132e-38	0.358864	0.755	0.488	3.03477e-34
IGFBP2	1.85722e-38	0.415555	0.835	0.616	3.4979e-34
SOX13	2.91436e-38	0.279637	0.626	0.321	5.48891e-34
AIF1L	3.3701e-38	0.336994	0.716	0.439	6.34725e-34
RNF44	7.99831e-38	0.348049	0.887	0.74	1.5064e-33
SLC16A1	1.1454e-37	0.406693	0.929	0.793	2.15724e-33
ZWILCH	1.23431e-37	0.338106	0.839	0.574	2.32469e-33
PCDH18	1.82572e-37	0.417376	0.619	0.336	3.43855e-33
YWHAE	6.80301e-37	0.250902	1	0.995	1.28128e-32
NOLC1	1.54636e-36	0.345386	0.955	0.817	2.91241e-32
SLC1A5	1.63142e-36	0.341709	0.861	0.593	3.07262e-32
IMPDH2	2.86215e-36	0.362348	0.897	0.782	5.39058e-32
DSCC1	2.88761e-36	0.287377	0.61	0.303	5.43852e-32
RFWD3	4.84414e-36	0.37652	0.748	0.505	9.12345e-32
ITPK1	5.17599e-36	0.308806	0.69	0.424	9.74846e-32
KIAA0101	5.68231e-36	0.35456	0.913	0.57	1.07021e-31
MCCC2	6.3086e-36	0.357187	0.855	0.665	1.18816e-31
PVRL1	8.57033e-36	0.286769	0.635	0.346	1.61414e-31
FKBP4	9.4951e-36	0.353797	0.945	0.831	1.78831e-31
SRSF7	1.05399e-35	0.327007	0.984	0.935	1.98508e-31
STC2	1.32982e-35	0.28258	0.516	0.219	2.50458e-31
TJP2	2.23857e-35	0.279146	0.61	0.306	4.21612e-31
NCL	2.40838e-35	0.315741	0.981	0.947	4.53594e-31
DNMT1	3.25967e-35	0.367082	0.897	0.731	6.13926e-31
HPRT1	4.75093e-35	0.346014	0.79	0.562	8.9479e-31
RBPJ	6.06028e-35	0.350746	0.926	0.88	1.14139e-30
TRIAP1	9.6983e-35	0.41168	0.839	0.658	1.82658e-30
DHTKD1	1.01723e-34	0.34863	0.832	0.639	1.91585e-30
CASP10	1.51934e-34	0.281591	0.555	0.257	2.86153e-30
MARCKSL1	2.95051e-34	0.291897	1	0.968	5.55699e-30
APOE	3.20928e-34	0.327039	0.987	0.902	6.04437e-30
NLGN2	4.75792e-34	0.344328	0.881	0.687	8.96106e-30
IDH1	6.70709e-34	0.34461	0.971	0.866	1.26321e-29
RMI2	1.34223e-33	0.320897	0.729	0.446	2.52795e-29
CAD	2.60297e-33	0.321915	0.768	0.524	4.90243e-29
IGSF8	2.66225e-33	0.313091	0.603	0.33	5.01408e-29
FASN	5.66259e-33	0.335267	0.971	0.86	1.06649e-28
PBX1	6.67767e-33	0.319334	0.968	0.914	1.25767e-28
NAA15	7.6255e-33	0.32994	0.871	0.692	1.43619e-28
PHGDH	8.15278e-33	0.279388	0.965	0.761	1.53549e-28
HNRNPUL1	1.00182e-32	0.306273	0.984	0.952	1.88683e-28
WDFY1	1.07888e-32	0.325323	0.758	0.539	2.03196e-28
MCM3	1.78034e-32	0.336485	0.881	0.654	3.3531e-28
RPS27	1.90885e-32	0.266316	1	0.996	3.59514e-28
GULP1	1.96375e-32	0.295255	0.8	0.587	3.69853e-28
DESI2	2.73046e-32	0.330418	0.765	0.568	5.14254e-28
GGCT	3.53505e-32	0.369549	0.829	0.692	6.65791e-28
TPI1	3.88104e-32	0.294525	0.987	0.98	7.30955e-28
MLL	6.9004e-32	0.370485	0.884	0.699	1.29962e-27
TUBA1C	8.64428e-32	0.328479	0.968	0.766	1.62806e-27
ENOPH1	2.10797e-31	0.306534	0.79	0.561	3.97016e-27
PLK1	3.10899e-31	0.342711	0.713	0.408	5.85547e-27
UCHL1	4.44858e-31	0.313434	0.994	0.898	8.37845e-27
CHML	4.6493e-31	0.314281	0.671	0.419	8.75648e-27
CENPF	6.5691e-31	0.293989	0.868	0.561	1.23722e-26
LSM12	7.81618e-31	0.295643	0.816	0.614	1.4721e-26
SNHG3	7.93322e-31	0.350992	0.794	0.578	1.49414e-26
ZNF322	8.33254e-31	0.353072	0.739	0.542	1.56935e-26
NOP58	9.88007e-31	0.324803	0.906	0.781	1.86081e-26
MYBL2	9.96861e-31	0.323069	0.784	0.476	1.87749e-26
SNHG1	1.09733e-30	0.355006	0.929	0.862	2.06671e-26
HIP1	1.26881e-30	0.298781	0.852	0.712	2.38968e-26
MTHFD1	1.28634e-30	0.355865	0.852	0.644	2.42269e-26
PPT1	1.56218e-30	0.317748	0.945	0.768	2.94222e-26
SRSF2	1.63156e-30	0.311579	0.987	0.945	3.07289e-26
SLC39A1	1.69617e-30	0.332202	0.8	0.616	3.19457e-26
PWWP2A	1.70201e-30	0.314487	0.755	0.551	3.20557e-26
NT5DC2	2.19283e-30	0.310125	0.958	0.856	4.12998e-26
ABRACL	2.81622e-30	0.331636	0.826	0.632	5.30407e-26
PIH1D1	6.47943e-30	0.318473	0.761	0.575	1.22034e-25
CD2AP	6.52461e-30	0.350785	0.797	0.649	1.22885e-25
DARS	9.23313e-30	0.324695	0.948	0.896	1.73897e-25
ZNF532	9.39736e-30	0.29205	0.819	0.627	1.7699e-25
ADAR	1.04052e-29	0.322532	0.926	0.853	1.95971e-25
IMP3	1.0951e-29	0.310275	0.816	0.634	2.0625e-25
TXLNG	1.18841e-29	0.312619	0.697	0.482	2.23825e-25
AKAP1	1.70932e-29	0.285066	0.552	0.29	3.21933e-25
GPM6B	2.11682e-29	0.272308	0.59	0.323	3.98682e-25
SLC2A3	2.43642e-29	0.389519	0.868	0.686	4.58875e-25
PHB	3.21442e-29	0.293003	0.961	0.912	6.05404e-25
RQCD1	1.76974e-28	0.281341	0.774	0.548	3.33313e-24
IQGAP1	1.95695e-28	0.335065	0.894	0.728	3.68572e-24
NAV2	2.3443e-28	0.317172	0.716	0.514	4.41526e-24
U2AF1	2.37044e-28	0.309477	0.958	0.761	4.46448e-24
PTPN4	3.04855e-28	0.312649	0.661	0.456	5.74164e-24
DHX33	2.0301e-27	0.27969	0.768	0.559	3.82349e-23
TCF3	2.24402e-27	0.294753	0.865	0.724	4.22638e-23
SLC35F2	2.48603e-27	0.276442	0.532	0.282	4.68219e-23
ZNFX1-AS1	3.15754e-27	0.320204	0.926	0.768	5.94691e-23
AEBP2	3.57394e-27	0.278499	0.687	0.497	6.73116e-23
DBI	4.31421e-27	0.286065	0.929	0.84	8.12538e-23
NIPSNAP1	7.68437e-27	0.296417	0.929	0.835	1.44728e-22
AEN	1.16438e-26	0.259163	0.6	0.344	2.19299e-22
NUP205	1.40947e-26	0.299318	0.806	0.624	2.6546e-22
ROR1	1.50198e-26	0.303759	0.871	0.677	2.82884e-22
PPM1B	1.58539e-26	0.306392	0.787	0.631	2.98593e-22
PDCD2L	1.68841e-26	0.308187	0.665	0.438	3.17995e-22
CKS1B	1.70467e-26	0.314047	0.948	0.785	3.21057e-22
APBB2	1.84692e-26	0.275153	0.59	0.355	3.47849e-22
ARG2	2.24014e-26	0.263289	0.606	0.352	4.21908e-22
RANBP1	2.54987e-26	0.30546	0.919	0.82	4.80242e-22
ARL2	4.32572e-26	0.280954	0.839	0.678	8.14707e-22
TRIM2	4.45401e-26	0.291257	0.684	0.475	8.38868e-22
GNAI2	4.53675e-26	0.279195	0.968	0.903	8.54451e-22
API5	8.83942e-26	0.281103	0.932	0.808	1.66482e-21
SMARCC1	9.1537e-26	0.292598	0.945	0.848	1.72401e-21
SYNCRIP	9.69306e-26	0.299226	0.923	0.888	1.82559e-21
PLS3	1.17153e-25	0.262107	0.894	0.734	2.20646e-21
STIP1	1.19793e-25	0.28884	0.913	0.794	2.25618e-21
CCNB2	1.40531e-25	0.269686	0.845	0.546	2.64675e-21
CCT5	1.86657e-25	0.263802	0.974	0.903	3.5155e-21
IMPA2	1.92749e-25	0.301393	0.871	0.667	3.63024e-21
TRMT112	2.25492e-25	0.277786	0.977	0.924	4.24691e-21
ALG3	2.72876e-25	0.277473	0.765	0.571	5.13935e-21
TRIP10	3.34629e-25	0.281561	0.842	0.674	6.30241e-21
OSBPL1A	3.79511e-25	0.280394	0.777	0.615	7.1477e-21
NOTCH3	4.7413e-25	0.303098	0.787	0.614	8.92976e-21
SMARCA5	7.26381e-25	0.294232	0.948	0.873	1.36807e-20
BUB3	7.6564e-25	0.325798	0.874	0.753	1.44201e-20
ACVR2B	1.02329e-24	0.299391	0.884	0.778	1.92727e-20
SF3B4	1.44631e-24	0.289499	0.955	0.873	2.72398e-20
DAZAP1	1.57713e-24	0.300772	0.823	0.699	2.97036e-20
SLC2A1	1.82479e-24	0.329954	0.69	0.487	3.43681e-20
CHRAC1	2.08555e-24	0.311763	0.694	0.524	3.92792e-20
GNL3	2.15035e-24	0.267488	0.771	0.575	4.04996e-20
ATIC	3.22382e-24	0.300222	0.903	0.772	6.07174e-20
KIF5C	3.8326e-24	0.256962	0.726	0.463	7.21832e-20
HSPA9	5.38812e-24	0.265815	0.903	0.797	1.0148e-19
ZBTB44	9.73873e-24	0.274549	0.8	0.63	1.83419e-19
DHFR	1.03448e-23	0.268018	0.897	0.703	1.94833e-19
SLC38A2	1.08322e-23	0.256012	0.977	0.949	2.04013e-19
CHEK1	1.11994e-23	0.273037	0.7	0.48	2.10929e-19
SH3BP4	1.12376e-23	0.319677	0.858	0.706	2.11649e-19
STRN4	1.16011e-23	0.279564	0.932	0.862	2.18494e-19
DDR1	1.22363e-23	0.287372	0.735	0.57	2.30459e-19
UBAP2L	1.24846e-23	0.261676	0.919	0.809	2.35136e-19
CECR1	1.29139e-23	0.279279	0.771	0.565	2.4322e-19
C1GALT1	1.67519e-23	0.267758	0.823	0.667	3.15505e-19
AURKB	2.07836e-23	0.269886	0.726	0.439	3.91439e-19
TACC3	2.20846e-23	0.252108	0.755	0.467	4.15941e-19
SRRM1	3.0422e-23	0.287769	0.9	0.834	5.72968e-19
HNRNPM	3.0992e-23	0.269687	0.971	0.913	5.83703e-19
NACC1	3.21971e-23	0.25552	0.835	0.663	6.064e-19
RPRD1A	3.48683e-23	0.282906	0.835	0.691	6.56709e-19
GSPT2	3.99517e-23	0.273086	0.635	0.44	7.5245e-19
TK1	4.3177e-23	0.255775	0.703	0.422	8.13195e-19
WNK3	5.03973e-23	0.251119	0.584	0.37	9.49183e-19
HNRNPF	6.63931e-23	0.264716	0.91	0.84	1.25045e-18
CDYL	7.59398e-23	0.286297	0.642	0.465	1.43025e-18
CALM1	7.93191e-23	0.250951	0.99	0.94	1.4939e-18
SLC38A1	8.1986e-23	0.255523	0.945	0.863	1.54413e-18
ZMYND8	8.91889e-23	0.266031	0.832	0.699	1.67978e-18
ACIN1	1.14315e-22	0.273447	0.913	0.837	2.15301e-18
CSNK1E	1.15239e-22	0.298961	0.89	0.734	2.1704e-18
SEPHS1	1.39828e-22	0.263513	0.823	0.674	2.63353e-18
SACS	1.47394e-22	0.282417	0.774	0.593	2.77602e-18
LYPLA1	1.54075e-22	0.274202	0.884	0.786	2.90186e-18
BRWD3	1.55246e-22	0.280117	0.719	0.562	2.9239e-18
CIRH1A	1.56783e-22	0.254087	0.739	0.532	2.95286e-18
GAS5	1.87889e-22	0.253181	0.91	0.829	3.53871e-18
LSM14A	2.08885e-22	0.279542	0.939	0.875	3.93415e-18
PLEKHB1	2.14442e-22	0.257848	0.481	0.269	4.0388e-18
TRIM37	2.34859e-22	0.274602	0.719	0.55	4.42333e-18
DKC1	3.04973e-22	0.31573	0.794	0.656	5.74386e-18
GLUL	3.17624e-22	0.250855	0.91	0.836	5.98214e-18
MSH6	3.97558e-22	0.259008	0.858	0.677	7.48761e-18
BCL11A	4.3482e-22	0.268944	0.594	0.369	8.1894e-18
BANF1	4.3588e-22	0.252394	0.987	0.924	8.20936e-18
AZIN1	5.29736e-22	0.253619	0.906	0.84	9.97706e-18
ID1	6.18123e-22	0.322049	0.884	0.704	1.16417e-17
TALDO1	8.36593e-22	0.279598	0.803	0.682	1.57564e-17
BTBD2	1.51561e-21	0.26276	0.858	0.758	2.85449e-17
KIF20B	1.71054e-21	0.256628	0.768	0.526	3.22163e-17
HMGB3	2.68969e-21	0.276912	0.806	0.681	5.06576e-17
PELP1	3.86901e-21	0.263373	0.806	0.647	7.28689e-17
AMD1	5.65534e-21	0.279818	0.787	0.682	1.06513e-16
CBX2	6.15628e-21	0.25238	0.674	0.473	1.15947e-16
RBM27	7.84694e-21	0.256084	0.784	0.639	1.47789e-16
SNRPD1	8.50258e-21	0.250215	0.884	0.773	1.60138e-16
SV2A	8.66582e-21	0.301142	0.823	0.658	1.63212e-16
BASP1	1.15636e-20	0.268252	0.952	0.897	2.17789e-16
EHMT2	1.50327e-20	0.262159	0.829	0.708	2.83126e-16
HLA-B	1.68722e-20	0.253771	0.61	0.408	3.17772e-16
CTBP2	1.91607e-20	0.266013	0.881	0.83	3.60873e-16
ASNA1	2.76448e-20	0.264428	0.803	0.698	5.20661e-16
MEG3	3.04903e-20	0.283918	0.248	0.088	5.74255e-16
MTF2	3.12808e-20	0.262236	0.887	0.794	5.89143e-16
IARS	4.13825e-20	0.255222	0.939	0.884	7.79399e-16
DEK	4.46133e-20	0.256089	0.942	0.861	8.40248e-16
SERP1	8.42406e-20	0.26433	0.926	0.841	1.58659e-15
CARM1	9.77236e-20	0.253648	0.806	0.674	1.84053e-15
ATP13A2	1.32681e-19	0.254751	0.729	0.586	2.49892e-15
SESN3	2.12864e-19	0.316798	0.755	0.628	4.00907e-15
NUS1	4.2255e-19	0.265424	0.835	0.731	7.9583e-15
VAT1	1.93076e-18	0.263057	0.887	0.757	3.6364e-14
C11orf84	2.1375e-18	0.266343	0.732	0.59	4.02577e-14
AKIRIN1	2.30216e-18	0.258915	0.9	0.853	4.3359e-14
POU2F1	3.03823e-18	0.272771	0.858	0.754	5.72221e-14
DDIT4	1.53599e-17	0.315931	0.539	0.34	2.89289e-13
FZD7	1.96884e-17	0.268049	0.858	0.738	3.70811e-13
TAOK1	2.50759e-17	0.262544	0.9	0.858	4.72279e-13
CENPH	2.94106e-17	0.252174	0.723	0.542	5.53918e-13
MRP63	3.1621e-17	0.253848	0.845	0.698	5.9555e-13
ZNF738	4.12404e-17	0.26532	0.735	0.585	7.76722e-13
GFPT1	9.1301e-17	0.254302	0.829	0.718	1.71956e-12
H1F0	1.69007e-16	0.31279	0.752	0.624	3.18307e-12
NLRP2	1.69566e-10	0.336177	0.319	0.197	3.1936e-06
PKDCC	3.42531e-10	0.57288	0.723	0.721	6.45122e-06
BNIP3	6.18458e-10	0.307617	0.861	0.82	1.1648e-05

## Sheet: cluster D0_2
	p_val	avg_logFC	pct.1	pct.2	p_val_adj
LOC100505817	2.03235e-252	0.771686	0.893	0.097	3.82773e-248		as shown in Figure 4
SOX3	6.41118e-236	0.423228	0.642	0.037	1.20748e-231
LCK	2.51659e-228	0.414224	0.646	0.041	4.73975e-224
CLDN7	2.04132e-224	0.65207	0.868	0.101	3.84461e-220
UCA1	3.18011e-219	1.13604	0.979	0.159	5.98943e-215
HHLA2	1.5021e-213	0.9646	0.947	0.166	2.82905e-209
ETV4	3.62115e-211	0.50845	0.704	0.065	6.82007e-207
MAL2	8.32406e-202	0.712938	0.885	0.123	1.56775e-197
SOX2	2.53989e-198	1.19069	0.996	0.141	4.78363e-194
HTR7	3.22323e-198	0.342588	0.584	0.04	6.07063e-194
ZSCAN10	2.10827e-195	0.991209	0.947	0.181	3.97071e-191
MT1G	1.42608e-193	0.668231	0.547	0.035	2.68588e-189
TDGF1	2.5602e-193	0.440321	0.695	0.069	4.82188e-189
KIF1A	4.85233e-189	0.790776	0.934	0.15	9.13889e-185
AP1M2	5.85414e-180	0.843253	0.942	0.182	1.10257e-175
SFRP2	1.31667e-179	1.18253	0.979	0.251	2.47981e-175
NFE2L3	3.32332e-179	0.365722	0.597	0.052	6.25914e-175
POLR3G	1.87364e-178	1.00386	0.942	0.23	3.52882e-174
L1TD1	3.85927e-178	1.46809	0.996	0.316	7.26855e-174
GYLTL1B	8.09047e-176	0.43873	0.704	0.076	1.52376e-171
USP44	9.55878e-175	0.61924	0.798	0.117	1.8003e-170
PTPRZ1	2.40856e-167	0.913464	0.963	0.239	4.53628e-163
PMAIP1	1.30427e-166	0.465438	0.728	0.095	2.45646e-162
LOC100188947	1.57763e-165	2.23766	1	0.413	2.9713e-161
CD9	1.11547e-162	0.701488	0.901	0.192	2.10087e-158
ESRP1	1.53434e-162	0.630145	0.844	0.142	2.88978e-158
ESRG	4.93953e-162	2.44509	1	0.399	9.30311e-158
EPCAM	1.26e-161	0.898705	0.947	0.223	2.37308e-157
LOC100131138	7.4169e-161	0.415115	0.667	0.079	1.3969e-156
THY1	4.52772e-159	1.00611	0.872	0.204	8.52751e-155
SCNN1A	9.37627e-159	0.511825	0.79	0.114	1.76593e-154
CYP2S1	4.05126e-158	0.830675	0.959	0.237	7.63014e-154
NANOG	2.21019e-156	0.598201	0.72	0.11	4.16268e-152
POU5F1	7.79783e-155	0.58744	0.835	0.158	1.46864e-150
NLGN4X	2.6544e-154	1.21316	0.984	0.351	4.9993e-150
GABRB3	3.19173e-154	0.819022	0.893	0.215	6.0113e-150
GBP4	3.45573e-154	1.01287	0.963	0.315	6.50852e-150
CASP10	6.48001e-152	0.731842	0.909	0.234	1.22045e-147
CDH1	1.4927e-151	0.546072	0.852	0.136	2.81136e-147
KIAA1244	6.43303e-151	0.544611	0.802	0.134	1.2116e-146
GPR176	6.47668e-151	0.638263	0.856	0.18	1.21982e-146
LECT1	1.87437e-150	0.600841	0.856	0.147	3.53019e-146
PIM2	2.56481e-150	0.518931	0.802	0.145	4.83056e-146
CHGA	5.32349e-149	0.479583	0.679	0.094	1.00263e-144
GPR160	5.31204e-148	0.345553	0.568	0.057	1.00047e-143
FBXL16	8.00275e-147	0.289829	0.551	0.052	1.50724e-142
DPPA4	2.95144e-142	1.35999	1	0.536	5.55875e-138
HSD11B2	7.7105e-142	0.277006	0.506	0.046	1.4522e-137
PRELP	6.34097e-140	0.827778	0.938	0.287	1.19426e-135
CRABP1	9.29703e-139	0.868144	0.967	0.287	1.751e-134
JPH4	3.73877e-137	0.561947	0.778	0.141	7.04159e-133
DNMT3B	5.4996e-135	1.3926	1	0.463	1.03579e-130
ZIC2	1.10281e-132	0.940771	0.963	0.27	2.07703e-128
SMPDL3B	1.43219e-132	0.438598	0.753	0.123	2.69739e-128
SYT6	6.22078e-131	0.4999	0.782	0.145	1.17162e-126
MAP7	6.27496e-131	0.529358	0.798	0.168	1.18183e-126
FLJ22184	6.77423e-131	0.360707	0.708	0.113	1.27586e-126
SCG3	9.77417e-131	0.316132	0.634	0.092	1.84087e-126
HHLA3	1.86001e-130	0.992483	0.984	0.452	3.50314e-126
LINC00263	5.97821e-128	0.775371	0.914	0.289	1.12594e-123
GAL	2.57688e-127	0.500364	0.741	0.142	4.85331e-123
TERF1	1.10957e-126	1.42742	1	0.801	2.08977e-122
FGF2	3.32324e-126	0.800697	0.93	0.309	6.25898e-122
MT1X	7.80416e-126	0.612114	0.65	0.114	1.46984e-121
PHC1	9.28267e-125	1.04081	0.996	0.593	1.7483e-120
STMN3	5.33917e-124	0.547912	0.811	0.183	1.00558e-119
FAM101B	7.47568e-123	0.558095	0.794	0.194	1.40797e-118
SCGB3A2	3.38454e-121	0.336478	0.601	0.083	6.37445e-117
CLDN3	3.45955e-121	0.252115	0.543	0.064	6.51572e-117
CD24	1.67364e-119	1.5346	1	0.763	3.15213e-115
PYCARD	3.25992e-119	0.355791	0.683	0.121	6.13973e-115
GNG4	3.6552e-119	0.366417	0.646	0.108	6.88421e-115
STC1	8.18e-119	0.459084	0.576	0.081	1.54062e-114
ADCY2	2.66733e-116	0.452213	0.663	0.125	5.02365e-112
DBNDD1	7.43296e-114	0.68462	0.938	0.332	1.39992e-109
CLDN6	1.02004e-113	1.20879	1	0.684	1.92115e-109
PIPOX	7.26565e-111	0.318757	0.576	0.089	1.36841e-106
SPINT1	1.077e-110	0.462381	0.761	0.179	2.02843e-106
IFITM1	3.79619e-110	0.955183	0.992	0.571	7.14975e-106
AASS	1.28887e-109	1.20428	1	0.753	2.42747e-105
TTC9	3.43059e-109	0.30497	0.56	0.088	6.46116e-105
MT1F	2.26531e-108	0.298771	0.486	0.061	4.26649e-104
FAM46B	1.47579e-107	0.508317	0.827	0.224	2.77951e-103
FOXO1	2.867e-107	0.607821	0.889	0.284	5.39971e-103
GLDC	5.9422e-107	0.26352	0.498	0.064	1.11915e-102
VASH2	1.07312e-106	0.726015	0.905	0.353	2.02112e-102
EPHX3	4.06261e-105	0.384396	0.658	0.131	7.65153e-101
DANCR	1.71497e-104	0.866243	0.996	0.838	3.22997e-100
TRIM22	9.45082e-104	0.254897	0.444	0.049	1.77997e-99
PDPN	1.54835e-102	0.610296	0.868	0.278	2.91617e-98
SYT3	2.67954e-101	0.343272	0.601	0.109	5.04665e-97
HSPD1	3.90651e-100	0.682258	1	0.965	7.35753e-96
ZIC5	5.73676e-100	0.43986	0.757	0.185	1.08046e-95
HSP90AB1	9.6884e-100	0.598918	1	0.995	1.82471e-95
ERBB3	1.84082e-99	0.280546	0.588	0.101	3.467e-95
SLC29A1	7.27026e-99	0.671709	0.918	0.378	1.36928e-94
VRTN	7.94333e-99	0.518048	0.827	0.243	1.49605e-94
RARRES2	3.62403e-98	0.381932	0.704	0.151	6.8255e-94
PSAT1	1.73859e-97	0.917661	0.988	0.714	3.27447e-93
TCF7L1	1.03646e-96	0.793413	0.992	0.676	1.95207e-92
FGFBP3	1.93614e-96	0.454688	0.757	0.188	3.64653e-92
RAB25	2.10169e-95	0.369978	0.658	0.145	3.95833e-91
LAD1	5.14465e-94	0.277693	0.556	0.097	9.68943e-90
IFI30	2.41668e-93	0.437176	0.733	0.188	4.55157e-89
RBFOX3	3.48773e-93	0.258182	0.461	0.062	6.5688e-89
SLC7A3	6.5312e-93	0.736598	0.951	0.438	1.23009e-88
DMKN	2.14415e-92	0.725539	0.971	0.607	4.03829e-88
DDX21	3.527e-92	0.785741	1	0.823	6.64276e-88
INA	3.77952e-91	0.326624	0.588	0.116	7.11834e-87
HSPE1	3.15766e-89	0.670978	0.996	0.923	5.94714e-85
JARID2	6.292e-89	0.791963	0.979	0.706	1.18503e-84
BEND4	2.44502e-88	0.252977	0.531	0.091	4.60495e-84
RCC2	3.88186e-88	0.685936	0.996	0.773	7.31109e-84
PODXL	6.73009e-87	0.849222	0.988	0.56	1.26755e-82
RBM47	8.08885e-87	0.426817	0.687	0.188	1.52345e-82
EFCAB4A	9.87019e-87	0.291017	0.576	0.113	1.85895e-82
ALPL	3.52557e-86	0.434933	0.835	0.251	6.64006e-82
MT-ATP6	2.93523e-85	0.451721	1	1	5.52822e-81
LIN28A	5.22636e-85	0.797676	1	0.711	9.84332e-81
SBK1	1.11693e-84	0.596703	0.951	0.492	2.10362e-80
TRIM28	5.71091e-84	0.577309	1	0.971	1.07559e-79
FCHO1	1.10978e-83	0.289247	0.539	0.105	2.09015e-79
ITGA6	3.1976e-83	0.582232	0.893	0.35	6.02237e-79
LOC100506013	1.26841e-82	0.340913	0.494	0.082	2.38892e-78
CLDN10	8.16034e-82	0.267111	0.551	0.112	1.53692e-77
TUBB2B	2.24058e-81	0.703714	0.984	0.522	4.21991e-77
USP9X	3.7375e-81	0.724506	1	0.904	7.0392e-77
AK4	4.27334e-80	0.64754	0.844	0.384	8.04841e-76
PHF17	1.05471e-79	0.700593	0.967	0.574	1.98644e-75
OLFM1	1.27767e-79	0.291043	0.654	0.148	2.40636e-75
PAICS	1.72877e-79	0.663737	1	0.857	3.25597e-75
FAM124A	3.51283e-79	0.286266	0.609	0.135	6.61607e-75
PSIP1	5.26477e-79	0.65023	0.992	0.845	9.91567e-75
SEPHS1	7.4803e-79	0.689119	0.947	0.667	1.40884e-74
ADD2	1.13176e-78	0.362205	0.683	0.195	2.13155e-74
FAM60A	4.27845e-78	0.657722	1	0.871	8.05802e-74
FKBP4	2.48402e-77	0.640018	0.996	0.829	4.6784e-73
PAR-SN	4.12815e-77	0.544565	0.909	0.43	7.77496e-73
UGP2	8.18551e-77	0.746764	1	0.908	1.54166e-72
HMGA1	1.0749e-76	0.707758	1	0.91	2.02447e-72
MT-ND5	1.07554e-76	0.615516	1	0.999	2.02568e-72
DYX1C1	1.21962e-76	0.486353	0.827	0.317	2.29704e-72
PPIA	1.73947e-76	0.436083	1	0.999	3.27611e-72
WBSCR17	3.68019e-76	0.270346	0.547	0.116	6.93127e-72
CHAC1	8.44454e-76	0.300501	0.473	0.086	1.59044e-71
SNRPB	1.66763e-75	0.59912	1	0.888	3.14082e-71
PRDM7	2.99718e-75	0.599495	0.84	0.366	5.64489e-71
NELL2	3.9176e-75	0.284254	0.576	0.133	7.37842e-71
MT-ND4	5.15549e-75	0.410564	1	1	9.70985e-71
MIAT	5.3407e-75	0.291965	0.568	0.12	1.00587e-70
TUBB3	6.48585e-75	0.53207	0.938	0.414	1.22154e-70
MT-ND2	1.15957e-74	0.529441	1	1	2.18393e-70
SFRP1	2.70526e-74	0.743041	1	0.919	5.09509e-70
RPL13A	7.33918e-74	0.587906	1	0.96	1.38226e-69
SEMA6A	1.03996e-73	0.663975	0.979	0.603	1.95865e-69
NLN	3.16308e-73	0.645163	0.971	0.729	5.95735e-69
SALL2	6.09719e-73	0.608635	0.951	0.621	1.14834e-68
PDLIM1	8.76638e-73	0.65096	0.996	0.827	1.65106e-68
SLC7A1	9.8739e-73	0.480758	0.848	0.366	1.85965e-68
MAD2L2	1.51599e-72	0.590732	0.926	0.587	2.85521e-68
CBS	7.50792e-72	0.647012	0.988	0.722	1.41404e-67
SLC7A8	5.34982e-71	0.365959	0.716	0.229	1.00758e-66
PFN1	6.69762e-71	0.489886	1	0.995	1.26143e-66
ZNF770	1.27798e-70	0.603789	0.984	0.797	2.40695e-66
TSPAN33	1.29541e-70	0.266858	0.519	0.11	2.43977e-66
MFGE8	3.2167e-70	0.632015	0.959	0.683	6.05834e-66
PPP2R2B	7.4448e-70	0.329409	0.593	0.145	1.40215e-65
LINGO1	1.00783e-68	0.261261	0.56	0.132	1.89815e-64
SYT1	1.26815e-68	0.375424	0.658	0.197	2.38843e-64
PLA2G16	2.47508e-68	0.362287	0.683	0.213	4.66157e-64
PTMA	1.00207e-67	0.510545	1	0.986	1.8873e-63
MT-ND4L	3.92388e-67	0.787303	1	0.973	7.39024e-63
IQGAP2	5.906e-67	0.412471	0.819	0.33	1.11234e-62
ZBTB44	7.29189e-67	0.53789	0.938	0.622	1.37335e-62
FOXN3	1.21758e-66	0.562756	0.992	0.783	2.29318e-62
TTLL12	1.64218e-66	0.527957	0.885	0.484	3.09289e-62
MT-CO2	5.5971e-66	0.391769	1	1	1.05416e-61
WFDC2	1.91198e-65	0.373314	0.745	0.266	3.60102e-61
CBR1	2.53042e-65	0.505663	0.753	0.324	4.76579e-61
SET	3.06715e-65	0.474395	1	0.985	5.77667e-61
KAL1	4.13424e-65	0.456929	0.778	0.315	7.78642e-61
MT-CO3	1.49333e-64	0.32514	1	1	2.81254e-60
MTHFD2	2.38388e-64	0.515626	0.901	0.521	4.4898e-60
MT-ATP8	4.24323e-64	0.667614	1	0.995	7.9917e-60
RAP1GAP2	7.57113e-64	0.252567	0.556	0.14	1.42595e-59
TRIM71	7.99057e-64	0.442	0.786	0.333	1.50494e-59
PAR5	1.28605e-63	0.375704	0.7	0.238	2.42214e-59
OSBPL10	1.63896e-63	0.292499	0.634	0.191	3.08682e-59
PARP1	2.08521e-63	0.521154	0.988	0.819	3.92729e-59
PITPNC1	3.69798e-63	0.37135	0.704	0.246	6.96477e-59
HELLS	4.4339e-63	0.52707	0.93	0.489	8.35081e-59
NPM1	7.57644e-63	0.48115	1	0.987	1.42695e-58
CTSC	8.49075e-63	0.540534	0.967	0.742	1.59915e-58
LRRN1	1.31154e-62	0.450102	0.807	0.331	2.47016e-58
DPYSL2	6.64645e-62	0.521274	0.979	0.739	1.25179e-57
MTHFD1	1.94901e-61	0.522622	0.959	0.64	3.67077e-57
GRB10	2.06288e-61	0.417086	0.835	0.398	3.88523e-57
LINC00617	2.56998e-61	0.323228	0.658	0.205	4.84029e-57
BCAT1	9.95356e-61	0.596217	1	0.822	1.87465e-56
SLC39A10	1.85506e-60	0.520511	0.963	0.733	3.49381e-56
C20orf27	3.69986e-60	0.409271	0.872	0.469	6.96831e-56
GFPT2	4.69824e-60	0.511671	0.86	0.455	8.84866e-56
FGFR1	7.08219e-60	0.507736	0.992	0.738	1.33386e-55
PEBP1	1.03409e-59	0.44504	1	0.957	1.94761e-55
SRM	1.88795e-59	0.501691	0.971	0.732	3.55577e-55
VSNL1	1.89788e-59	0.306274	0.798	0.273	3.57446e-55
DNAL1	2.09024e-59	0.46185	0.823	0.454	3.93676e-55
B3GNT7	3.38376e-59	0.470029	0.802	0.403	6.37298e-55
FBL	5.32646e-59	0.516894	0.996	0.858	1.00319e-54
FAM65B	2.19013e-58	0.310724	0.547	0.149	4.12489e-54
SLC2A3	3.74459e-58	0.613545	0.934	0.685	7.05256e-54
TARS	3.84501e-58	0.504055	0.971	0.783	7.24169e-54
TMEM158	4.45455e-57	0.260226	0.519	0.126	8.3897e-53
MED14	1.12024e-56	0.415177	0.877	0.48	2.10985e-52
CIRH1A	3.35996e-56	0.450664	0.893	0.524	6.32814e-52
LARP1	3.9435e-56	0.44675	0.996	0.941	7.4272e-52
FAM222B	5.48492e-56	0.484127	0.959	0.712	1.03303e-51
HNRNPAB	1.75713e-55	0.471769	0.992	0.902	3.30938e-51
ITPK1	4.52827e-55	0.402564	0.811	0.42	8.52854e-51
CXADR	8.047e-55	0.48599	0.988	0.833	1.51557e-50
IPW	1.61367e-54	0.48515	0.971	0.786	3.03918e-50
ENO2	7.20476e-54	0.361248	0.827	0.364	1.35694e-49
FRAT2	8.29956e-54	0.366224	0.786	0.341	1.56314e-49
CKS2	8.44004e-54	0.575258	0.996	0.643	1.5896e-49
EIF3B	2.15706e-53	0.47995	0.971	0.827	4.06261e-49
SLC39A14	2.23368e-53	0.525683	0.872	0.57	4.20691e-49
ENO1	2.7742e-53	0.427378	1	0.991	5.22494e-49
LPCAT1	1.69806e-52	0.442002	0.872	0.499	3.19812e-48
GJA1	1.72709e-52	0.530793	0.992	0.633	3.2528e-48
TXLNG	4.23228e-52	0.416711	0.848	0.474	7.97108e-48
MSH2	5.33536e-52	0.525967	0.951	0.714	1.00486e-47
IPO7	7.70471e-52	0.432242	0.992	0.889	1.45111e-47
TJP2	9.87329e-52	0.344203	0.728	0.303	1.85954e-47
LDB2	1.83724e-51	0.315097	0.72	0.287	3.46026e-47
RAB3B	2.24417e-51	0.358579	0.872	0.449	4.22667e-47
USO1	2.84929e-51	0.456944	0.975	0.831	5.36635e-47
CRMP1	3.65119e-51	0.362984	0.753	0.32	6.87665e-47
SEPT3	4.20794e-51	0.278035	0.601	0.198	7.92523e-47
MDN1	5.43444e-51	0.473365	0.827	0.472	1.02352e-46
SS18L2	5.43516e-51	0.426158	0.872	0.537	1.02366e-46
SALL4	5.76749e-51	0.396152	0.835	0.411	1.08625e-46
STC2	7.55235e-51	0.306285	0.634	0.216	1.42241e-46
EIF4B	1.06424e-50	0.388725	1	0.984	2.00438e-46
BUB1B	1.96249e-50	0.41898	0.844	0.395	3.69616e-46
GPC4	2.85002e-50	0.441906	0.852	0.456	5.36773e-46
DKC1	3.02932e-50	0.439436	0.942	0.647	5.70542e-46
IGFBP4	8.97022e-50	0.359454	0.807	0.397	1.68945e-45
NCL	1.22124e-49	0.427641	1	0.946	2.30007e-45
RRAS2	1.40024e-49	0.433609	0.934	0.664	2.63722e-45
STRBP	1.96705e-49	0.414832	0.926	0.646	3.70475e-45
FXYD5	8.15294e-49	0.358886	0.827	0.449	1.53552e-44
PRKX	4.03395e-48	0.448463	0.811	0.446	7.59755e-44
DIAPH2	7.25884e-48	0.379169	0.778	0.383	1.36713e-43
HSPA9	7.60198e-48	0.415413	0.959	0.794	1.43176e-43
ACOT7	8.31746e-48	0.406161	0.893	0.548	1.56651e-43
EIF2C2	1.56808e-47	0.28397	0.671	0.268	2.95332e-43
SPRY4	2.07366e-47	0.536074	0.634	0.248	3.90553e-43
ARRB2	6.5019e-47	0.352604	0.753	0.376	1.22457e-42
RND2	6.83697e-47	0.414467	0.934	0.612	1.28768e-42
EIF1AX	7.49642e-47	0.413707	1	0.917	1.41188e-42
NOLC1	8.06061e-47	0.443157	0.971	0.819	1.51814e-42
PTBP3	1.07082e-46	0.444723	0.963	0.702	2.01678e-42
AURKB	1.39095e-46	0.405009	0.885	0.433	2.61971e-42
IDH1	1.48996e-46	0.445357	0.988	0.867	2.80619e-42
LARS	2.31364e-46	0.390107	0.979	0.784	4.3575e-42
SNHG5	3.9594e-46	0.423942	0.979	0.824	7.45713e-42
RPS5	4.28211e-46	0.346287	1	0.992	8.06492e-42
ATXN7L1	5.92576e-46	0.265597	0.576	0.205	1.11606e-41
CLU	6.07634e-46	0.331215	0.951	0.588	1.14442e-41
AZIN1	9.05271e-46	0.402476	0.975	0.836	1.70499e-41
C1orf233	1.02319e-45	0.283245	0.617	0.231	1.92707e-41
KAT7	1.21303e-45	0.436494	0.831	0.533	2.28462e-41
ATIC	1.25123e-45	0.409358	0.975	0.769	2.35656e-41
CSE1L	1.37858e-45	0.453122	1	0.844	2.59641e-41
HNRNPD	1.39928e-45	0.377156	1	0.983	2.6354e-41
SLC1A5	1.60243e-45	0.458494	0.877	0.598	3.01802e-41
MCM4	2.53773e-45	0.444116	0.938	0.581	4.77957e-41
PRKDC	3.72439e-45	0.413758	0.996	0.884	7.01452e-41
RARG	4.00252e-45	0.301945	0.757	0.328	7.53834e-41
METTL8	4.14784e-45	0.375116	0.79	0.439	7.81204e-41
SLC25A39	6.83791e-45	0.390194	0.979	0.876	1.28785e-40
GPRC5B	7.76404e-45	0.271748	0.654	0.253	1.46228e-40
XRCC5	7.90297e-45	0.371944	1	0.961	1.48844e-40
F11R	9.9033e-45	0.327433	0.782	0.383	1.86519e-40
HSPA4	2.74899e-44	0.397984	0.975	0.805	5.17745e-40
SHMT2	2.79303e-44	0.420565	0.897	0.591	5.2604e-40
STIP1	3.94309e-44	0.418808	0.988	0.79	7.42642e-40
NASP	4.79074e-44	0.438704	0.992	0.847	9.02288e-40
MCM7	7.11493e-44	0.465196	0.979	0.736	1.34003e-39
UCHL1	7.64013e-44	0.430545	1	0.899	1.43894e-39
SPINT2	1.01935e-43	0.421099	1	0.93	1.91985e-39
CORO2A	2.00229e-43	0.308785	0.671	0.287	3.77112e-39
AKAP1	2.14654e-43	0.321207	0.654	0.287	4.04279e-39
NCAPG2	6.39398e-43	0.335237	0.798	0.404	1.20424e-38
SLC3A2	6.60129e-43	0.448176	0.938	0.76	1.24329e-38
RIF1	7.37927e-43	0.427537	0.942	0.769	1.38981e-38
MRPS34	8.46562e-43	0.395168	0.93	0.738	1.59442e-38
QSER1	9.13615e-43	0.44892	0.938	0.724	1.7207e-38
LRPPRC	1.1601e-42	0.377789	0.975	0.875	2.18492e-38
KLHL7	1.64371e-42	0.388578	0.901	0.644	3.09576e-38
MOB3B	3.79651e-42	0.252079	0.576	0.214	7.15034e-38
MID1IP1	4.19223e-42	0.36867	0.885	0.504	7.89565e-38
MYO10	4.53268e-42	0.375937	0.918	0.535	8.53684e-38
IGSF8	4.70367e-42	0.326398	0.695	0.329	8.85889e-38
UNG	5.31301e-42	0.355613	0.905	0.547	1.00065e-37
DUT	5.96217e-42	0.421057	0.975	0.747	1.12292e-37
ENOPH1	7.86783e-42	0.38514	0.864	0.56	1.48183e-37
CDK2AP1	9.70128e-42	0.389439	0.996	0.899	1.82714e-37
SRSF3	1.32561e-41	0.39117	0.996	0.945	2.49666e-37
VDAC1	1.44236e-41	0.340903	0.996	0.969	2.71654e-37
SYNCRIP	1.57073e-41	0.427036	0.992	0.883	2.95831e-37
HLA-C	3.29465e-41	0.306778	0.77	0.365	6.20514e-37
TUBA1C	4.15185e-41	0.426376	1	0.768	7.81959e-37
PVRL1	6.33508e-41	0.307822	0.733	0.345	1.19315e-36
SNHG3	6.96606e-41	0.415054	0.877	0.576	1.31199e-36
RBPJ	1.12116e-40	0.40285	0.971	0.877	2.11159e-36
SERBP1	1.35846e-40	0.300781	1	0.985	2.55852e-36
MCM2	2.47985e-40	0.411933	0.942	0.573	4.67055e-36
CCT5	2.59282e-40	0.387598	0.996	0.902	4.88332e-36
TRMT112	2.93457e-40	0.370784	1	0.923	5.52697e-36
ADM	4.67648e-40	0.395989	0.531	0.193	8.80768e-36
RPL22L1	5.08718e-40	0.397923	0.856	0.55	9.5812e-36
CHML	5.73198e-40	0.351224	0.77	0.416	1.07956e-35
MT-ND3	5.9784e-40	0.292718	1	1	1.12597e-35
TSIX	7.56483e-40	0.437242	0.893	0.636	1.42476e-35
ERBB2	1.40501e-39	0.373634	0.79	0.491	2.6462e-35
ITPR2	1.57911e-39	0.258163	0.56	0.21	2.9741e-35
PPAT	2.52783e-39	0.361586	0.848	0.515	4.76091e-35
MT-CYB	2.66837e-39	0.266337	1	1	5.02561e-35
SRSF7	3.15321e-39	0.383122	0.992	0.935	5.93876e-35
RMI2	4.25671e-39	0.330566	0.827	0.444	8.01709e-35
U2AF1	4.97862e-39	0.399107	0.988	0.763	9.37674e-35
LOC100505876	5.33161e-39	0.320452	0.671	0.319	1.00415e-34
MT-RNR2	5.66587e-39	0.456241	1	1	1.06711e-34
MRPL3	8.37161e-39	0.359383	0.971	0.804	1.57671e-34
TCEA1	9.04926e-39	0.363888	0.996	0.881	1.70434e-34
PHB	9.23866e-39	0.344264	0.984	0.911	1.74001e-34
PSME3	1.77349e-38	0.362922	0.955	0.816	3.3402e-34
IMP3	2.07254e-38	0.359965	0.889	0.632	3.90343e-34
IGF2BP3	2.7949e-38	0.387859	0.951	0.777	5.26392e-34
LSM12	3.02923e-38	0.352838	0.893	0.612	5.70526e-34
CEBPZ	4.28927e-38	0.406711	0.901	0.657	8.07841e-34
HLA-B	4.70907e-38	0.279937	0.778	0.399	8.86906e-34
NUDT15	4.80497e-38	0.3352	0.765	0.437	9.04969e-34
KHSRP	1.0069e-37	0.360317	0.996	0.905	1.89639e-33
TP53	1.2633e-37	0.304375	0.86	0.54	2.37929e-33
GNPTAB	1.43547e-37	0.323612	0.753	0.411	2.70356e-33
CYB5A	1.60639e-37	0.313482	0.823	0.492	3.02548e-33
CDCA7L	1.83294e-37	0.257516	0.658	0.285	3.45216e-33
CACYBP	2.18537e-37	0.363006	0.971	0.798	4.11592e-33
PRPS2	2.26896e-37	0.256066	0.58	0.235	4.27337e-33
UBE2K	2.76971e-37	0.360201	0.963	0.85	5.21646e-33
RPL18A	3.24681e-37	0.299831	1	0.998	6.11504e-33
SERP1	3.72143e-37	0.374606	0.979	0.838	7.00895e-33
NUS1	4.29304e-37	0.365521	0.942	0.725	8.08551e-33
EI24	6.37589e-37	0.364499	0.984	0.873	1.20083e-32
FLT1	7.11474e-37	0.357428	0.856	0.496	1.33999e-32
PSMA3	7.27562e-37	0.349866	0.996	0.859	1.37029e-32
HPRT1	7.74156e-37	0.358178	0.852	0.562	1.45804e-32
SLC16A1	8.6773e-37	0.390317	0.992	0.791	1.63428e-32
SERINC5	1.14244e-36	0.361834	0.938	0.705	2.15168e-32
PPM1B	1.39757e-36	0.319668	0.885	0.626	2.63219e-32
MCM5	1.77918e-36	0.391246	0.901	0.547	3.35091e-32
IGFBP2	1.91881e-36	0.458829	0.897	0.616	3.61389e-32
TUBB	2.03737e-36	0.378474	1	0.988	3.83718e-32
TGIF1	3.43844e-36	0.380228	0.893	0.574	6.47595e-32
MRP63	3.4722e-36	0.334839	0.93	0.694	6.53955e-32
GULP1	4.30964e-36	0.335963	0.86	0.587	8.11678e-32
TET1	4.6712e-36	0.40792	0.942	0.719	8.79774e-32
NHP2L1	5.359e-36	0.385592	0.988	0.77	1.00931e-31
PPP1CC	5.63983e-36	0.35076	1	0.929	1.06221e-31
TRIAP1	6.03844e-36	0.416055	0.897	0.657	1.13728e-31
PTGES3	9.41674e-36	0.331305	0.996	0.937	1.77355e-31
RALA	1.259e-35	0.348181	0.926	0.683	2.3712e-31
AGPAT5	1.3425e-35	0.377199	0.877	0.628	2.52846e-31
SKIL	1.3986e-35	0.365965	0.856	0.56	2.63412e-31
NAA15	1.65364e-35	0.368953	0.914	0.692	3.11446e-31
DAZAP1	1.96137e-35	0.333271	0.889	0.696	3.69405e-31
ARG2	2.15622e-35	0.266676	0.695	0.35	4.06103e-31
BUB1	2.74678e-35	0.2662	0.757	0.349	5.17329e-31
WDHD1	2.93288e-35	0.32693	0.815	0.451	5.5238e-31
RABGAP1L	3.11888e-35	0.343711	0.881	0.548	5.8741e-31
ILF3	3.86844e-35	0.349191	0.988	0.927	7.28582e-31
GSPT1	4.90161e-35	0.3223	0.979	0.845	9.23169e-31
EPB41L2	5.99325e-35	0.352745	0.93	0.644	1.12877e-30
ALG3	6.94409e-35	0.356788	0.811	0.572	1.30785e-30
EEF1E1	8.06979e-35	0.316012	0.819	0.522	1.51986e-30
ASS1	1.85546e-34	0.251852	0.864	0.433	3.49458e-30
SLC38A1	1.95889e-34	0.361424	0.975	0.863	3.68937e-30
NPM3	1.98934e-34	0.285378	0.757	0.424	3.74672e-30
EPHX1	2.0747e-34	0.274878	0.658	0.322	3.90749e-30
SNRPD1	2.69752e-34	0.345853	0.971	0.768	5.0805e-30
AKIRIN1	2.94767e-34	0.344523	0.955	0.849	5.55163e-30
GART	3.36146e-34	0.315981	0.852	0.602	6.33098e-30
MCCC2	3.6043e-34	0.359446	0.897	0.666	6.78834e-30
CCDC86	3.60795e-34	0.287254	0.749	0.418	6.79522e-30
SLC4A7	3.7258e-34	0.320314	0.852	0.563	7.01717e-30
DNAJB6	4.17082e-34	0.361836	0.959	0.842	7.85532e-30
CHRAC1	5.2685e-34	0.323887	0.819	0.517	9.92269e-30
AIF1L	5.63229e-34	0.295492	0.782	0.44	1.06079e-29
GPM6B	9.35646e-34	0.286454	0.65	0.324	1.7622e-29
HN1	1.10909e-33	0.353788	0.992	0.826	2.08885e-29
PHGDH	2.37411e-33	0.31828	0.992	0.763	4.47141e-29
CKB	4.1914e-33	0.320515	0.996	0.795	7.89408e-29
MGC21881	4.37041e-33	0.260915	0.576	0.249	8.23123e-29
PHLPP1	4.64245e-33	0.264003	0.749	0.421	8.7436e-29
SNRPG	4.88956e-33	0.31319	0.971	0.808	9.209e-29
GNL3	5.78548e-33	0.323222	0.872	0.571	1.08964e-28
DHX33	6.15339e-33	0.291007	0.848	0.557	1.15893e-28
AMD1	9.91959e-33	0.340016	0.893	0.676	1.86826e-28
PROSER1	1.1661e-32	0.324846	0.872	0.594	2.19623e-28
CCND1	1.37324e-32	0.332374	0.819	0.432	2.58635e-28
ARF3	1.66809e-32	0.340176	0.992	0.85	3.14169e-28
RRM2B	1.76384e-32	0.310239	0.642	0.336	3.32201e-28
TACC3	2.07491e-32	0.297193	0.872	0.463	3.90788e-28
LYAR	2.15561e-32	0.288651	0.753	0.423	4.05987e-28
KRAS	2.21353e-32	0.349512	0.959	0.774	4.16896e-28
RFWD3	2.68038e-32	0.367024	0.79	0.507	5.04823e-28
CD2AP	2.68632e-32	0.340102	0.877	0.645	5.05941e-28
RPL14	2.78369e-32	0.282102	1	0.993	5.24281e-28
CDC123	3.0296e-32	0.310202	0.975	0.878	5.70595e-28
TOMM40	5.16863e-32	0.325685	0.93	0.721	9.7346e-28
CKS1B	6.81748e-32	0.368729	0.988	0.785	1.284e-27
CAPZB	1.27041e-31	0.319678	0.996	0.907	2.39268e-27
KDR	1.2904e-31	0.304568	0.716	0.371	2.43035e-27
TK1	1.3177e-31	0.294467	0.802	0.42	2.48176e-27
HDGF	1.38721e-31	0.302798	0.992	0.929	2.61267e-27
SORL1	1.59596e-31	0.254762	0.835	0.438	3.00583e-27
PDCD2L	2.45114e-31	0.29182	0.741	0.437	4.61648e-27
FAM169A	3.5326e-31	0.307854	0.691	0.399	6.65331e-27
OCLN	3.65349e-31	0.287856	0.831	0.488	6.88099e-27
CCNB2	4.24887e-31	0.259848	0.942	0.544	8.00233e-27
TMX1	4.49436e-31	0.338822	0.885	0.635	8.46468e-27
MYCN	6.0567e-31	0.346166	0.914	0.589	1.14072e-26
PMF1	6.98389e-31	0.291598	0.947	0.749	1.31535e-26
SLIRP	7.31721e-31	0.303724	0.959	0.824	1.37812e-26
NUFIP2	8.8582e-31	0.324086	0.955	0.836	1.66835e-26
RANBP1	9.2867e-31	0.328327	0.971	0.817	1.74906e-26
ARFGEF1	9.98507e-31	0.313927	0.856	0.605	1.88059e-26
LIN28B	1.026e-30	0.350798	0.951	0.676	1.93238e-26
HCFC1	1.04305e-30	0.336911	0.967	0.785	1.96448e-26
ASNS	1.28604e-30	0.322464	0.753	0.488	2.42212e-26
ZWILCH	1.62034e-30	0.312522	0.856	0.579	3.05174e-26
HEATR1	1.7453e-30	0.27478	0.749	0.452	3.28709e-26
MGST1	1.8536e-30	0.315663	0.996	0.876	3.49108e-26
UTP20	2.31582e-30	0.270454	0.695	0.38	4.36162e-26
DLGAP5	2.80584e-30	0.278191	0.794	0.395	5.28452e-26
PRKCI	3.32024e-30	0.276654	0.794	0.497	6.25334e-26
MKI67	3.97136e-30	0.270608	0.856	0.455	7.47966e-26
CDC25A	7.18986e-30	0.286363	0.761	0.408	1.35414e-25
GGCT	7.657e-30	0.30459	0.901	0.689	1.44212e-25
SNRPF	7.94025e-30	0.299915	0.951	0.766	1.49547e-25
FZD3	1.06744e-29	0.312456	0.905	0.686	2.01042e-25
HNRNPC	1.12713e-29	0.270317	1	0.987	2.12284e-25
TFRC	1.73526e-29	0.303018	0.654	0.338	3.26819e-25
TMEM33	2.01544e-29	0.303792	0.877	0.665	3.79589e-25
HK1	2.22555e-29	0.304939	0.955	0.793	4.1916e-25
SNHG16	2.23351e-29	0.290114	1	0.957	4.20659e-25
BUB3	2.60823e-29	0.34396	0.942	0.75	4.91233e-25
NAP1L3	2.8059e-29	0.326893	0.741	0.467	5.28463e-25
NQO2	4.8683e-29	0.315144	0.86	0.584	9.16896e-25
PIH1D1	5.39195e-29	0.273948	0.823	0.574	1.01552e-24
RTN3	6.76603e-29	0.305115	0.984	0.861	1.27431e-24
ABCE1	7.60308e-29	0.305391	0.926	0.737	1.43196e-24
PABPC1	1.25272e-28	0.324071	1	0.982	2.35938e-24
HMMR	1.33397e-28	0.268149	0.704	0.348	2.51239e-24
ATP1B3	2.02012e-28	0.330022	1	0.884	3.80469e-24
DHRS11	2.37662e-28	0.262068	0.634	0.338	4.47614e-24
TALDO1	2.85237e-28	0.284517	0.901	0.677	5.37215e-24
RAN	4.22451e-28	0.301629	0.996	0.957	7.95643e-24
IMPDH2	4.90745e-28	0.294243	0.942	0.781	9.2427e-24
NOP56	8.03272e-28	0.340428	0.955	0.799	1.51288e-23
HDAC2	8.8765e-28	0.296292	1	0.943	1.6718e-23
LDHA	9.24266e-28	0.356774	0.996	0.92	1.74076e-23
FKBP1A	9.53292e-28	0.283407	0.988	0.928	1.79543e-23
SLC39A1	2.0271e-27	0.295796	0.823	0.618	3.81784e-23
IARS	2.42485e-27	0.299172	0.975	0.882	4.56695e-23
DESI2	2.74216e-27	0.303864	0.79	0.57	5.16458e-23
TCOF1	2.81586e-27	0.313156	0.893	0.649	5.30339e-23
LPHN1	2.89538e-27	0.271843	0.823	0.526	5.45316e-23
ADAR	3.9574e-27	0.322592	0.971	0.851	7.45337e-23
EIF2AK2	4.11987e-27	0.262742	0.749	0.461	7.75937e-23
PTPN12	4.851e-27	0.290747	0.938	0.782	9.13638e-23
HSPA8	5.07281e-27	0.27153	1	0.987	9.55413e-23
PTBP1	5.96407e-27	0.322588	0.979	0.855	1.12327e-22
MRPL34	6.52672e-27	0.263619	0.909	0.741	1.22924e-22
CSTB	8.18841e-27	0.290868	0.988	0.857	1.5422e-22
TCF7L2	1.05326e-26	0.302892	0.947	0.762	1.98371e-22
RNF44	1.09266e-26	0.291307	0.909	0.742	2.05792e-22
PHB2	1.25517e-26	0.271326	0.996	0.931	2.36399e-22
UBE2G1	1.33911e-26	0.288179	0.934	0.782	2.52207e-22
SNHG8	1.90953e-26	0.255938	0.815	0.569	3.59641e-22
PNP	2.99848e-26	0.251757	0.658	0.363	5.64734e-22
ETF1	4.87955e-26	0.285547	0.93	0.768	9.19014e-22
C1QBP	4.99833e-26	0.2909	0.877	0.677	9.41385e-22
IQGAP1	1.23881e-25	0.294738	0.963	0.726	2.33317e-21
CHEK1	1.38391e-25	0.281144	0.774	0.479	2.60646e-21
PCNA	1.61314e-25	0.313731	0.905	0.611	3.03819e-21
SLC2A1	1.68422e-25	0.314294	0.77	0.485	3.17206e-21
NUP205	2.23865e-25	0.252903	0.897	0.62	4.21627e-21
MCM3	2.25408e-25	0.302154	0.901	0.658	4.24533e-21
PSMA5	3.54874e-25	0.266601	0.992	0.909	6.6837e-21
DARS	3.83687e-25	0.343787	0.984	0.894	7.22637e-21
MIS18BP1	4.02054e-25	0.25123	0.786	0.477	7.57229e-21
NCKAP1	4.42166e-25	0.267341	0.979	0.892	8.32775e-21
ITGB5	5.53508e-25	0.281399	0.84	0.597	1.04248e-20
HSD17B4	5.82898e-25	0.26085	0.889	0.685	1.09783e-20
WDFY1	6.30491e-25	0.292118	0.782	0.542	1.18747e-20
EIF5A	8.76567e-25	0.302924	0.926	0.772	1.65093e-20
LTA4H	9.70613e-25	0.267032	0.951	0.823	1.82805e-20
KIF20B	1.29436e-24	0.260029	0.864	0.523	2.43781e-20
NME1	1.44342e-24	0.269012	0.897	0.699	2.71854e-20
ABRACL	2.03061e-24	0.279447	0.86	0.634	3.82445e-20
PPT1	2.04399e-24	0.303452	0.938	0.772	3.84964e-20
CCNG1	2.17395e-24	0.293484	0.996	0.921	4.09443e-20
G6PC3	2.54829e-24	0.26765	0.975	0.83	4.79945e-20
USP7	2.7322e-24	0.280485	0.914	0.753	5.14583e-20
TNRC6A	3.40342e-24	0.285252	0.909	0.771	6.41001e-20
CAD	6.61886e-24	0.263735	0.786	0.528	1.2466e-19
UCK2	7.74845e-24	0.263722	0.77	0.504	1.45934e-19
PSMD11	8.10002e-24	0.264546	0.963	0.865	1.52556e-19
TKT	9.51394e-24	0.280727	0.971	0.739	1.79186e-19
RMI1	1.14196e-23	0.264054	0.757	0.464	2.15076e-19
PGM2L1	1.16964e-23	0.251119	0.728	0.459	2.20289e-19
SLC44A1	1.23189e-23	0.269982	0.835	0.612	2.32015e-19
SIGMAR1	1.30767e-23	0.308867	0.864	0.675	2.46286e-19
UBR5	1.3158e-23	0.308039	0.889	0.72	2.47818e-19
OAT	1.36009e-23	0.262304	0.761	0.535	2.5616e-19
APRT	1.90748e-23	0.254792	0.868	0.626	3.59255e-19
RPUSD3	2.28548e-23	0.262078	0.807	0.593	4.30446e-19
EIF4G1	2.91858e-23	0.296978	0.938	0.817	5.49686e-19
ILF2	3.44259e-23	0.26867	0.984	0.887	6.48377e-19
SRRM1	4.39502e-23	0.271124	0.975	0.829	8.27759e-19
FAM98A	8.48397e-23	0.260397	0.782	0.537	1.59787e-18
FASN	1.09571e-22	0.293583	0.996	0.86	2.06367e-18
RNF213	1.14129e-22	0.27702	0.934	0.763	2.1495e-18
TRA2B	1.50107e-22	0.278131	0.975	0.901	2.82712e-18
SPATS2L	1.70072e-22	0.276313	0.852	0.653	3.20314e-18
HSPH1	2.38414e-22	0.289461	0.872	0.69	4.49029e-18
ARPP19	2.54981e-22	0.259796	0.979	0.927	4.8023e-18
EPRS	2.83355e-22	0.252059	0.963	0.849	5.33671e-18
EHMT2	3.22133e-22	0.26601	0.877	0.707	6.06706e-18
GARS	4.24179e-22	0.277508	0.918	0.753	7.98898e-18
DNMT1	5.27113e-22	0.257575	0.93	0.732	9.92764e-18
YWHAH	6.06106e-22	0.262425	0.914	0.715	1.14154e-17
FAM108B1	6.22386e-22	0.25003	0.733	0.467	1.1722e-17
HMGB3	1.20097e-21	0.252058	0.905	0.675	2.26192e-17
TPM3	1.28088e-21	0.25307	0.984	0.846	2.4124e-17
USP10	1.44745e-21	0.26633	0.922	0.801	2.72612e-17
ZC3HAV1	2.15551e-21	0.271108	0.93	0.736	4.05968e-17
C1GALT1	3.59562e-21	0.255524	0.877	0.666	6.772e-17
ZNF322	4.73283e-21	0.262882	0.765	0.544	8.91382e-17
PTAR1	4.98227e-21	0.255828	0.864	0.66	9.3836e-17
SMC6	4.98852e-21	0.253723	0.909	0.703	9.39538e-17
ASNA1	7.53539e-21	0.250784	0.901	0.692	1.41922e-16
ZNF217	8.17525e-21	0.25141	0.835	0.633	1.53973e-16
CTBP2	1.05223e-20	0.264486	0.938	0.827	1.98178e-16
CNN2	1.29936e-20	0.251796	0.996	0.948	2.44721e-16
SMARCC1	2.85995e-20	0.254775	0.967	0.848	5.38643e-16
H2AFZ	5.69466e-19	0.262739	0.996	0.917	1.07253e-14
IMPA2	8.56104e-19	0.265373	0.881	0.671	1.61239e-14
ATF4	1.5524e-18	0.250072	0.971	0.9	2.92378e-14
TOP1	1.95692e-18	0.26482	0.86	0.686	3.68566e-14
LIPA	6.43692e-17	0.266909	0.675	0.478	1.21233e-12
FAM162A	5.09308e-16	0.251372	0.881	0.692	9.59231e-12
NLRP2	1.34098e-14	0.306953	0.379	0.194	2.5256e-10
SERPINB9	2.1541e-14	0.410411	0.86	0.684	4.05703e-10

## Sheet: cluster D4_1
	p_val	avg_logFC	pct.1	pct.2	p_val_adj
APLNR	0	2.43656	0.989	0.136	0		as shown in Figure 4
MESP2	2.64139e-284	0.516921	0.56	0.014	4.9748e-280
LHX1	2.1901e-270	1.0414	0.744	0.055	4.12483e-266
MESP1	2.82029e-261	0.460076	0.612	0.028	5.31173e-257
PCDH19	2.12603e-236	0.780283	0.615	0.038	4.00417e-232
EOMES	1.03348e-234	0.346111	0.469	0.011	1.94645e-230
DLL3	4.42937e-230	1.73234	0.927	0.183	8.34227e-226
COL13A1	8.08097e-207	0.571306	0.762	0.095	1.52197e-202
GYPB	1.77637e-195	0.575548	0.516	0.03	3.34561e-191
TMEM132B	2.92305e-188	0.535276	0.692	0.082	5.50527e-184
SAMD3	3.41932e-183	0.326079	0.476	0.026	6.43994e-179
HAS2	4.03146e-183	0.925533	0.853	0.158	7.59285e-179
NTS	5.31188e-177	1.95985	0.89	0.206	1.00044e-172
ANPEP	8.06712e-161	0.30981	0.52	0.045	1.51936e-156
SERPINE2	4.24471e-160	2.12659	0.996	0.608	7.99449e-156
LRIG3	2.53175e-157	0.564856	0.751	0.142	4.76831e-153
CRABP2	8.31926e-150	1.45037	0.993	0.603	1.56685e-145
GYPE	7.42546e-146	0.354437	0.403	0.025	1.39851e-141
CNTNAP2	1.78724e-137	1.41656	0.974	0.489	3.36609e-133
CYP1B1	3.36788e-134	0.558635	0.604	0.089	6.34306e-130
ZIC3	5.98008e-134	0.655769	0.868	0.237	1.12629e-129
IRX3	5.49701e-128	0.943876	0.938	0.331	1.03531e-123
ADAM12	1.26714e-127	0.456849	0.652	0.11	2.38654e-123
NTRK3	6.2848e-127	0.260478	0.425	0.037	1.18368e-122
GJA1	2.39311e-122	1.1928	0.989	0.63	4.50719e-118
FOXC1	1.88735e-121	0.737585	0.813	0.233	3.55463e-117
LIPG	1.37085e-119	0.406986	0.601	0.097	2.58186e-115
HAND1	1.05243e-117	0.958285	0.821	0.249	1.98214e-113
LEFTY2	2.40768e-117	1.31802	0.612	0.107	4.53462e-113
BMPER	5.34495e-113	0.651264	0.762	0.193	1.00667e-108
PKM	2.69283e-112	0.736378	1	0.993	5.07167e-108
DLL1	2.26393e-110	0.256888	0.348	0.027	4.26389e-106
TUBB2A	1.34151e-108	1.08503	0.96	0.526	2.52659e-104
FSCN1	7.45514e-108	0.838766	0.993	0.937	1.4041e-103
FAM89A	7.63353e-105	0.96147	0.875	0.341	1.4377e-100
CA2	1.10859e-102	0.301124	0.531	0.086	2.08793e-98
MN1	1.17585e-100	0.604486	0.813	0.276	2.2146e-96
OLFM1	6.63745e-100	0.519749	0.645	0.144	1.2501e-95
IRX5	1.40783e-97	0.380236	0.579	0.112	2.65151e-93
PTCH1	1.17765e-96	0.443216	0.685	0.176	2.21798e-92
LEPREL1	5.19778e-96	0.737634	0.875	0.406	9.7895e-92
ROR2	2.61337e-93	0.46893	0.751	0.242	4.92202e-89
RPS3	4.70652e-93	0.538614	1	0.99	8.86426e-89
H2AFY2	8.44227e-93	0.735759	0.982	0.755	1.59002e-88
KCNG1	1.63523e-92	0.434269	0.718	0.211	3.07979e-88
SALL1	1.504e-91	0.493512	0.806	0.294	2.83264e-87
C6orf132	2.24465e-90	0.442442	0.615	0.15	4.22758e-86
HS3ST3A1	2.58234e-90	0.398711	0.571	0.117	4.86359e-86
ELMO1	7.52113e-90	0.316678	0.63	0.142	1.41653e-85
ADA	1.02783e-89	0.536888	0.762	0.275	1.93581e-85
ASS1	2.88725e-89	0.870233	0.901	0.425	5.43785e-85
FERMT2	1.03385e-83	0.794454	0.971	0.799	1.94716e-79
ENO1	2.02586e-83	0.56708	1	0.99	3.81551e-79
KIAA1462	7.37171e-81	0.604056	0.788	0.294	1.38839e-76
TAGLN2	1.27916e-80	0.63498	0.857	0.391	2.40917e-76
WNT5A	4.46925e-80	0.692588	0.868	0.388	8.41739e-76
PTPN14	3.49066e-77	0.65681	0.963	0.724	6.57431e-73
PLXNA2	8.28047e-77	0.699447	0.908	0.471	1.55954e-72
ENPP1	1.69677e-73	0.429787	0.696	0.246	3.1957e-69
RAN	6.75423e-72	0.52918	1	0.957	1.27209e-67
GAL	3.67794e-71	0.602604	0.579	0.151	6.92704e-67
MSX1	2.66438e-70	0.311832	0.451	0.091	5.01809e-66
RPLP0	1.20148e-69	0.502687	0.996	0.988	2.26287e-65
VCP	1.46484e-69	0.48246	0.993	0.937	2.75888e-65
RPS2	1.4876e-69	0.416741	1	0.999	2.80175e-65
RPL8	1.30045e-68	0.457451	0.996	0.985	2.44928e-64
ITGA5	1.56462e-67	0.562532	0.912	0.534	2.9468e-63
ANP32B	1.70465e-67	0.547716	0.982	0.892	3.21054e-63
PCDH8	3.44057e-67	0.340531	0.289	0.036	6.47997e-63
RPS23	4.25625e-67	0.425864	1	0.998	8.01623e-63
TUBA1C	2.20951e-66	0.69843	0.982	0.767	4.16139e-62
NQO1	2.59437e-66	0.553294	0.883	0.478	4.88624e-62
RPL27A	1.41238e-65	0.443845	0.996	0.994	2.66007e-61
HMGA1	2.04633e-65	0.604435	0.993	0.91	3.85405e-61
RPS12	7.13557e-65	0.449878	1	0.998	1.34391e-60
APRT	8.48711e-65	0.492286	0.93	0.617	1.59846e-60
RPL4	9.5554e-65	0.373651	1	0.999	1.79966e-60
ZIC2	8.21937e-64	0.377794	0.824	0.276	1.54804e-59
EPB41L2	4.61336e-63	0.499295	0.967	0.638	8.68881e-59
RASL10B	4.74132e-63	0.563073	0.868	0.505	8.92981e-59
CCT5	1.01298e-62	0.515591	0.971	0.904	1.90784e-58
RPS9	1.24946e-62	0.470427	1	0.978	2.35322e-58
NPM1	1.41461e-62	0.504628	1	0.987	2.66428e-58
RPS18	3.4204e-62	0.469719	0.996	0.915	6.44198e-58
RPL7A	5.4339e-62	0.38979	1	0.997	1.02342e-57
DHCR24	6.923e-62	0.504338	0.963	0.695	1.30388e-57
PCDH10	7.10719e-62	0.308884	0.538	0.141	1.33857e-57
EIF5A	1.62821e-61	0.518041	0.963	0.766	3.06657e-57
L1CAM	1.97973e-61	0.273856	0.52	0.137	3.72863e-57
RPL29	2.05527e-61	0.448374	0.996	0.983	3.87089e-57
HMGB1	2.47631e-61	0.484453	0.996	0.981	4.66389e-57
TXN	5.00102e-60	0.473189	0.978	0.908	9.41891e-56
FADS1	5.12328e-60	0.536839	0.993	0.916	9.64918e-56
BCAR3	6.24949e-60	0.38522	0.692	0.27	1.17703e-55
GNPNAT1	3.17181e-59	0.500639	0.762	0.381	5.97379e-55
HLA-A	1.66223e-58	0.504813	0.963	0.811	3.13065e-54
GSTP1	1.806e-57	0.46685	0.996	0.947	3.40143e-53
CCT7	3.43683e-57	0.429039	0.967	0.873	6.47293e-53
FZD2	4.89357e-57	0.535723	0.916	0.672	9.21655e-53
PA2G4	5.71353e-57	0.482642	0.956	0.855	1.07609e-52
RAB31	5.91661e-57	0.572419	0.941	0.726	1.11433e-52
HSPD1	3.89379e-56	0.477152	0.993	0.966	7.33356e-52
C1QBP	2.6446e-55	0.501542	0.905	0.672	4.98083e-51
PREX1	8.61535e-55	0.278242	0.604	0.202	1.62262e-50
COLEC12	9.39779e-55	0.558486	0.813	0.4	1.76998e-50
OAZ1	3.57353e-54	0.371843	0.993	0.98	6.73038e-50
RPL17	5.36625e-54	0.435676	1	0.99	1.01068e-49
KCNMB4	1.43154e-53	0.48158	0.824	0.473	2.69615e-49
TM9SF3	3.32687e-53	0.493089	0.945	0.873	6.26582e-49
ACLY	5.02621e-53	0.460298	0.956	0.804	9.46637e-49
CHST11	2.59097e-52	0.27097	0.601	0.215	4.87982e-48
TPI1	2.84889e-52	0.3566	1	0.979	5.3656e-48
RPS19	7.40578e-52	0.422984	1	0.99	1.3948e-47
GNB2L1	1.21424e-51	0.43681	0.996	0.825	2.2869e-47
RAP2B	2.16531e-51	0.496007	0.872	0.56	4.07815e-47
CALB1	2.29421e-51	0.310081	0.319	0.06	4.32091e-47
HSP90AB1	3.51651e-51	0.368775	1	0.995	6.623e-47
LAPTM4B	6.04021e-51	0.494081	0.993	0.958	1.13761e-46
S100A11	6.62405e-51	0.544002	0.982	0.771	1.24757e-46
EEF1B2	1.11372e-50	0.356468	1	0.976	2.09758e-46
XRCC6	1.14107e-50	0.425241	0.978	0.91	2.14909e-46
CCT4	1.17092e-50	0.38901	0.989	0.949	2.20531e-46
PFN2	3.53841e-50	0.448254	0.993	0.959	6.66424e-46
SSRP1	5.76486e-50	0.45333	0.941	0.769	1.08575e-45
FBL	6.02514e-50	0.43321	0.978	0.858	1.13478e-45
RPL26	6.09636e-50	0.357452	1	0.995	1.14819e-45
LOX	8.6916e-50	0.459573	0.381	0.09	1.63698e-45
PTMA	2.93191e-49	0.412061	1	0.986	5.52197e-45
NANS	3.76884e-49	0.33107	0.806	0.42	7.09824e-45
RPL10	5.25986e-49	0.363611	1	0.998	9.90642e-45
CCNA2	5.84051e-49	0.445824	0.802	0.389	1.1e-44
RPS16	6.14591e-49	0.36686	1	0.991	1.15752e-44
KPNB1	7.42547e-49	0.414953	0.985	0.948	1.39851e-44
RPL12	9.41805e-49	0.381791	1	0.988	1.7738e-44
RPL14	1.0641e-48	0.337241	1	0.993	2.00413e-44
UCP2	4.09794e-48	0.437994	0.861	0.49	7.71806e-44
H2AFZ	8.49081e-48	0.47754	0.993	0.917	1.59916e-43
PGAM1	1.02909e-47	0.41456	0.941	0.836	1.93819e-43
RPL3	1.18325e-47	0.335097	1	0.997	2.22853e-43
SNRPB	1.5351e-47	0.438648	0.985	0.889	2.89121e-43
ORAI1	2.3556e-47	0.370712	0.755	0.399	4.43655e-43
IER5	2.96715e-47	0.266281	0.626	0.243	5.58834e-43
C17orf76-AS1	6.78525e-47	0.465053	0.993	0.808	1.27793e-42
TPM3	1.27412e-46	0.439308	0.978	0.845	2.39967e-42
CADM1	1.28289e-46	0.564779	0.905	0.63	2.4162e-42
RPS8	1.66397e-46	0.337725	1	0.997	3.13393e-42
CORO2A	2.35247e-46	0.317877	0.663	0.284	4.43063e-42
PTP4A2	2.42923e-46	0.395383	0.985	0.964	4.57521e-42
UBE2S	4.604e-46	0.547697	0.897	0.666	8.67117e-42
CRNDE	8.84481e-46	0.370837	0.747	0.385	1.66583e-41
RPLP2	9.40569e-46	0.388839	1	0.992	1.77147e-41
SET	1.68975e-45	0.367496	0.996	0.986	3.18247e-41
PYCR1	2.32383e-45	0.378576	0.799	0.478	4.37669e-41
EIF3B	3.12981e-45	0.397408	0.967	0.826	5.89468e-41
FKBP4	6.10395e-45	0.500956	0.945	0.833	1.14962e-40
COL5A1	6.57753e-45	0.474324	0.934	0.649	1.23881e-40
RPL13	7.26713e-45	0.295094	1	0.999	1.36869e-40
RANBP1	9.60049e-45	0.428655	0.963	0.817	1.80816e-40
RPL11	1.96294e-44	0.330505	1	0.995	3.69701e-40
CACHD1	3.37482e-44	0.421168	0.762	0.427	6.35614e-40
CCT6A	3.71831e-44	0.364636	0.982	0.935	7.00307e-40
TUBB2B	1.70422e-43	0.519882	0.923	0.523	3.20973e-39
RPL23A	2.74707e-43	0.349075	1	0.993	5.17383e-39
FABP5	4.327e-43	0.425368	0.96	0.781	8.14946e-39
EEF1G	9.33855e-43	0.313667	0.996	0.99	1.75882e-38
FEN1	9.37561e-43	0.438899	0.832	0.494	1.7658e-38
CREB3L1	1.08422e-42	0.397724	0.799	0.456	2.04203e-38
IGFBP4	1.22661e-42	0.379329	0.769	0.396	2.3102e-38
FASN	1.42132e-42	0.449896	0.985	0.86	2.67691e-38
PRTG	1.63454e-42	0.651043	0.985	0.749	3.07849e-38
ALYREF	2.81081e-42	0.284978	0.755	0.389	5.29387e-38
RPS14	3.14409e-42	0.368959	1	0.99	5.92158e-38
MID1IP1	3.30746e-42	0.391829	0.835	0.505	6.22928e-38
ATP1B3	3.53193e-42	0.424027	0.989	0.883	6.65203e-38
CDH11	4.7768e-42	0.350439	0.846	0.466	8.99662e-38
RHOA	5.34232e-42	0.314388	1	0.977	1.00617e-37
RPL18A	5.79857e-42	0.338928	1	0.998	1.0921e-37
MCM6	6.10214e-42	0.413269	0.894	0.589	1.14928e-37
SDC4	7.25986e-42	0.378235	0.795	0.466	1.36732e-37
EFNB1	8.9501e-42	0.311029	0.626	0.275	1.68566e-37
PLK2	9.7692e-42	0.378459	0.557	0.21	1.83993e-37
GYPC	1.2394e-41	0.393487	0.813	0.481	2.33428e-37
RPL18	1.82743e-41	0.345173	0.996	0.987	3.44179e-37
ACAA2	1.98836e-41	0.398868	0.941	0.803	3.74488e-37
TMSB15B	2.66845e-41	0.541002	0.626	0.3	5.02575e-37
RNASEH2A	3.25625e-41	0.370407	0.901	0.587	6.13281e-37
PTPLAD1	3.45046e-41	0.385972	0.974	0.741	6.4986e-37
RPLP1	7.19687e-41	0.344365	1	0.998	1.35546e-36
PTBP1	1.09065e-40	0.39209	0.974	0.854	2.05414e-36
RRM2	1.3413e-40	0.388866	0.828	0.474	2.52621e-36
PAGR1	1.49367e-40	0.350129	0.853	0.607	2.81317e-36
HSPA4	1.63316e-40	0.401465	0.938	0.806	3.07589e-36
PRMT1	1.74242e-40	0.371033	0.919	0.757	3.28167e-36
RPS6	2.35487e-40	0.326592	1	0.997	4.43516e-36
FTL	3.01863e-40	0.426343	1	0.983	5.68528e-36
PSMB4	3.19831e-40	0.345307	0.993	0.942	6.0237e-36
RPL19	3.42364e-40	0.323423	1	0.996	6.44808e-36
RPL6	3.5453e-40	0.293838	1	0.994	6.67721e-36
RPL36	4.10606e-40	0.34245	1	0.983	7.73335e-36
MIS18A	4.86435e-40	0.365106	0.832	0.529	9.16152e-36
NUDC	6.21986e-40	0.371336	0.945	0.84	1.17145e-35
C20orf27	7.90123e-40	0.315746	0.828	0.469	1.48812e-35
MRPS15	1.85313e-39	0.349591	0.916	0.73	3.49019e-35
PSMA7	1.87438e-39	0.334599	0.985	0.929	3.5302e-35
HSPE1	2.99504e-39	0.409556	0.974	0.924	5.64085e-35
ACSS3	3.95355e-39	0.264676	0.582	0.245	7.44612e-35
MSH2	4.21535e-39	0.417474	0.908	0.716	7.9392e-35
CLIC1	5.65329e-39	0.373296	0.974	0.849	1.06474e-34
SNRNP70	5.96172e-39	0.329241	0.985	0.923	1.12283e-34
APOC1	8.24488e-39	0.310818	0.758	0.371	1.55284e-34
PAICS	1.34549e-38	0.405794	0.982	0.858	2.53409e-34
RPL9	1.77084e-38	0.26733	1	0.999	3.3352e-34
ALDOA	1.80376e-38	0.33131	0.993	0.959	3.39721e-34
FTH1	2.09065e-38	0.352279	1	0.992	3.93754e-34
RPS7	2.27788e-38	0.282592	1	0.998	4.29015e-34
ATP11B	2.87611e-38	0.331997	0.747	0.431	5.41687e-34
GPX4	2.92155e-38	0.332783	0.993	0.944	5.50245e-34
SRM	4.29925e-38	0.378589	0.93	0.733	8.0972e-34
CCT8	4.3893e-38	0.33883	0.952	0.913	8.26681e-34
SCD	5.41897e-38	0.364569	0.996	0.94	1.02061e-33
SHMT2	5.7358e-38	0.390081	0.832	0.594	1.08028e-33
PSMD2	9.33315e-38	0.358341	0.952	0.822	1.75781e-33
SNRPD2	9.87337e-38	0.368806	0.993	0.876	1.85955e-33
MAD2L1	1.37976e-37	0.358584	0.791	0.454	2.59865e-33
NOP56	2.84237e-37	0.381599	0.952	0.798	5.35333e-33
CKS1B	2.99544e-37	0.449983	0.956	0.786	5.64162e-33
HSP90AA1	4.15702e-37	0.360275	0.996	0.988	7.82934e-33
HNRNPAB	4.37094e-37	0.384745	0.985	0.901	8.23222e-33
NCL	4.72071e-37	0.36913	0.985	0.947	8.89099e-33
PLTP	4.87358e-37	0.340163	0.941	0.749	9.1789e-33
C11orf75	5.16927e-37	0.259262	0.667	0.318	9.7358e-33
TRIM28	8.72529e-37	0.326636	0.989	0.971	1.64332e-32
PRKCDBP	9.87096e-37	0.341285	0.806	0.486	1.8591e-32
TCP1	1.02809e-36	0.377616	0.945	0.858	1.9363e-32
SLC5A6	2.24435e-36	0.323752	0.795	0.512	4.22701e-32
TKT	2.39531e-36	0.408221	0.967	0.737	4.51133e-32
RPL35	2.82145e-36	0.31468	1	0.99	5.31391e-32
ILF2	2.9087e-36	0.365547	0.985	0.886	5.47825e-32
SLIRP	3.37892e-36	0.378852	0.96	0.822	6.36386e-32
LARP7	3.73824e-36	0.465621	0.89	0.741	7.04061e-32
PRCP	4.76128e-36	0.339917	0.916	0.736	8.9674e-32
RPL24	5.58239e-36	0.325763	0.993	0.986	1.05139e-31
CCT3	7.34967e-36	0.329373	0.967	0.89	1.38424e-31
PCNA	8.87639e-36	0.410907	0.912	0.607	1.67178e-31
ENC1	9.16308e-36	0.34043	0.667	0.301	1.72577e-31
BAX	1.06312e-35	0.37212	0.634	0.293	2.00228e-31
RPS3A	1.62013e-35	0.254583	1	0.998	3.05134e-31
SRSF9	1.80625e-35	0.304061	0.835	0.568	3.4019e-31
SNRPD1	2.13577e-35	0.344867	0.952	0.767	4.02252e-31
BIN1	2.49831e-35	0.326531	0.824	0.509	4.70532e-31
TMED9	5.20869e-35	0.366454	0.919	0.731	9.81005e-31
RBM3	5.51473e-35	0.339895	0.978	0.887	1.03864e-30
LY6E	8.31695e-35	0.365931	0.912	0.696	1.56641e-30
STIP1	9.23767e-35	0.347074	0.927	0.794	1.73982e-30
FAU	1.07098e-34	0.301264	1	0.987	2.01709e-30
EEF2	1.19431e-34	0.29128	0.996	0.995	2.24936e-30
HNRNPC	1.3038e-34	0.298219	1	0.987	2.45557e-30
PSMB1	1.44594e-34	0.322637	0.985	0.955	2.72328e-30
PGP	2.26146e-34	0.321635	0.868	0.68	4.25923e-30
CENPH	2.31745e-34	0.289937	0.853	0.532	4.36469e-30
RPS24	2.60078e-34	0.26839	1	0.998	4.89831e-30
RPL7	2.84194e-34	0.269173	1	0.994	5.35252e-30
SLC25A39	2.95596e-34	0.331008	0.956	0.877	5.56726e-30
HIC2	3.32097e-34	0.336579	0.835	0.57	6.25472e-30
CASP6	3.37975e-34	0.331843	0.839	0.562	6.36543e-30
LDHA	4.80635e-34	0.326381	0.982	0.92	9.05227e-30
HNRNPM	7.72733e-34	0.34519	0.985	0.912	1.45537e-29
U2AF1	1.09555e-33	0.33603	0.96	0.764	2.06335e-29
HNRNPF	1.18522e-33	0.340557	0.952	0.837	2.23225e-29
CCNB1	1.25355e-33	0.430482	0.832	0.489	2.36093e-29
NUCKS1	1.34123e-33	0.31488	0.993	0.978	2.52607e-29
PSMD14	1.66037e-33	0.332864	0.897	0.732	3.12714e-29
TGIF1	2.30294e-33	0.371893	0.864	0.574	4.33735e-29
NGFR	2.45487e-33	0.308284	0.385	0.124	4.62351e-29
GMPS	2.70594e-33	0.326924	0.886	0.666	5.09636e-29
RRBP1	3.07163e-33	0.335296	0.773	0.511	5.78511e-29
CDC20	5.59508e-33	0.353929	0.729	0.374	1.05378e-28
UTP18	7.27694e-33	0.301678	0.799	0.497	1.37054e-28
MYBL2	7.36336e-33	0.319569	0.828	0.476	1.38682e-28
ALDH2	7.76757e-33	0.379593	0.832	0.607	1.46294e-28
SEZ6L2	1.14279e-32	0.289159	0.744	0.429	2.15233e-28
NCLN	1.25793e-32	0.252682	0.711	0.404	2.36918e-28
IPO4	1.31841e-32	0.279276	0.67	0.369	2.48308e-28
DDX1	1.58581e-32	0.316048	0.927	0.828	2.98672e-28
TUBB4B	1.69879e-32	0.370723	0.853	0.61	3.1995e-28
MRPS34	1.73995e-32	0.308776	0.912	0.738	3.27702e-28
AP2M1	1.94923e-32	0.292301	0.989	0.94	3.67118e-28
ROBO1	2.04559e-32	0.335675	0.813	0.541	3.85266e-28
SMARCA4	3.05644e-32	0.328066	0.952	0.858	5.75649e-28
XRCC5	3.15346e-32	0.303229	0.989	0.962	5.93923e-28
RPL28	3.2305e-32	0.32392	1	0.987	6.08432e-28
FBLN1	3.66764e-32	0.369137	0.956	0.722	6.90762e-28
RPS21	5.0267e-32	0.320606	1	0.974	9.46728e-28
HSP90B1	5.52407e-32	0.336289	0.989	0.963	1.0404e-27
SOCS2	6.03632e-32	0.273659	0.689	0.352	1.13688e-27
SNRPA1	6.63071e-32	0.345033	0.901	0.698	1.24883e-27
PHB2	8.48602e-32	0.312781	0.985	0.931	1.59826e-27
GNAI2	9.57377e-32	0.335034	0.974	0.903	1.80312e-27
UBE2L3	9.60165e-32	0.294265	0.967	0.893	1.80837e-27
AATF	9.8012e-32	0.281475	0.714	0.423	1.84596e-27
CACYBP	1.03493e-31	0.34287	0.923	0.8	1.94919e-27
RPL32	1.06142e-31	0.26736	1	0.996	1.99907e-27
SPDL1	1.06343e-31	0.306424	0.736	0.428	2.00287e-27
TACC3	1.49562e-31	0.389409	0.795	0.466	2.81685e-27
RPS15A	1.71954e-31	0.277558	1	0.996	3.23858e-27
RPS15	1.72666e-31	0.305276	1	0.992	3.25199e-27
TRIP10	2.22521e-31	0.343107	0.879	0.672	4.19097e-27
ALPK2	3.24426e-31	0.473126	0.868	0.594	6.11024e-27
HMGN2	3.32367e-31	0.348859	0.938	0.802	6.2598e-27
CD63	3.83505e-31	0.273499	0.993	0.948	7.22294e-27
CNOT2	4.95834e-31	0.301426	0.927	0.794	9.33854e-27
SNRPD3	5.50754e-31	0.321419	0.923	0.774	1.03729e-26
CALM3	5.53118e-31	0.308608	0.985	0.935	1.04174e-26
DDOST	6.86604e-31	0.305084	0.941	0.788	1.29315e-26
MELK	7.18748e-31	0.29467	0.766	0.431	1.35369e-26
RPS27A	7.48086e-31	0.255629	1	0.998	1.40894e-26
RPS5	7.6299e-31	0.280193	1	0.992	1.43701e-26
ITM2C	9.1314e-31	0.317534	0.989	0.964	1.71981e-26
ARID3A	1.35275e-30	0.331674	0.842	0.648	2.54777e-26
SEPT9	1.46525e-30	0.330082	0.967	0.845	2.75965e-26
RNASEH2B	1.56042e-30	0.291177	0.788	0.496	2.9389e-26
SLC1A5	1.65984e-30	0.340585	0.839	0.599	3.12614e-26
TRIP6	1.82385e-30	0.292784	0.897	0.682	3.43504e-26
PSMD1	1.90441e-30	0.341744	0.945	0.878	3.58677e-26
CKS2	1.9196e-30	0.421964	0.916	0.647	3.61537e-26
NPM3	2.21504e-30	0.305948	0.751	0.421	4.17181e-26
PSMD8	2.48623e-30	0.28809	0.945	0.814	4.68257e-26
TMPO	3.36891e-30	0.308004	0.949	0.762	6.345e-26
THRAP3	3.38907e-30	0.329442	0.956	0.854	6.38297e-26
HMGB2	4.18547e-30	0.3177	0.894	0.645	7.88292e-26
PDIA4	4.33194e-30	0.330413	0.897	0.669	8.15878e-26
RDBP	4.40159e-30	0.290755	0.846	0.583	8.28996e-26
WBP2	4.73758e-30	0.331244	0.93	0.79	8.92276e-26
LMNB2	5.82915e-30	0.29024	0.766	0.476	1.09786e-25
MTX1	6.43566e-30	0.271978	0.733	0.422	1.21209e-25
EVA1B	7.10329e-30	0.253161	0.67	0.366	1.33783e-25
PSMC3	8.13553e-30	0.329907	0.908	0.746	1.53225e-25
TK1	8.3997e-30	0.318997	0.751	0.421	1.582e-25
PSMA1	8.75199e-30	0.318722	0.945	0.864	1.64835e-25
SLC16A1	1.66459e-29	0.341238	0.963	0.792	3.1351e-25
PSMA6	1.70457e-29	0.301421	0.949	0.834	3.21038e-25
SMC4	2.21479e-29	0.365737	0.938	0.747	4.17133e-25
DCUN1D1	2.41909e-29	0.289241	0.722	0.431	4.55611e-25
FAM64A	2.43715e-29	0.271274	0.604	0.282	4.59013e-25
EIF4H	2.57416e-29	0.250704	0.989	0.973	4.84817e-25
ORC6	3.20566e-29	0.299786	0.824	0.535	6.03755e-25
DUSP5	3.3926e-29	0.259207	0.608	0.283	6.38962e-25
MYCN	3.54174e-29	0.399359	0.872	0.589	6.67051e-25
PPIA	4.02027e-29	0.259364	1	0.999	7.57177e-25
MSH6	4.23234e-29	0.326897	0.883	0.677	7.9712e-25
PPIB	4.68098e-29	0.290388	0.908	0.741	8.81615e-25
RPL27	4.89207e-29	0.275862	1	0.991	9.21372e-25
HSPA5	5.00623e-29	0.39835	0.974	0.949	9.42874e-25
NRBP1	6.28626e-29	0.286934	0.842	0.64	1.18395e-24
SSU72	7.2624e-29	0.275952	0.886	0.751	1.3678e-24
MZT1	7.43003e-29	0.31713	0.839	0.581	1.39937e-24
ATL2	8.43869e-29	0.254127	0.685	0.405	1.58934e-24
EIF4G1	9.77156e-29	0.316147	0.927	0.817	1.84038e-24
PSMA2	1.0497e-28	0.288091	0.938	0.834	1.977e-24
STOML2	1.07347e-28	0.300704	0.842	0.64	2.02177e-24
C18orf54	1.15865e-28	0.372376	0.762	0.473	2.1822e-24
PSMC5	1.28079e-28	0.265522	0.894	0.699	2.41223e-24
SOD1	1.39397e-28	0.277093	0.989	0.956	2.62541e-24
PSMA5	1.40918e-28	0.311385	0.956	0.912	2.65406e-24
ARL2	1.67604e-28	0.289747	0.875	0.677	3.15666e-24
BCL2L12	1.72508e-28	0.272138	0.817	0.535	3.24901e-24
SF3A3	1.91211e-28	0.271581	0.806	0.563	3.60127e-24
RPL38	1.9582e-28	0.252369	1	0.993	3.68808e-24
PSMD11	1.9651e-28	0.306273	0.949	0.865	3.70106e-24
REEP4	2.32906e-28	0.275227	0.678	0.38	4.38655e-24
CSE1L	2.33741e-28	0.314576	0.963	0.846	4.40228e-24
CSDA	2.4059e-28	0.260966	0.846	0.589	4.53128e-24
NUSAP1	2.50738e-28	0.298219	0.81	0.467	4.72239e-24
PARK7	2.6027e-28	0.276639	0.974	0.936	4.90193e-24
PABPC1	2.60988e-28	0.305428	1	0.982	4.91545e-24
ARHGAP11A	3.10879e-28	0.266121	0.626	0.322	5.85509e-24
C11orf31	4.13213e-28	0.29804	0.956	0.834	7.78246e-24
TOMM40	4.26845e-28	0.317757	0.872	0.724	8.0392e-24
NACC1	5.53556e-28	0.301406	0.85	0.664	1.04257e-23
BMP4	6.87872e-28	0.312891	0.824	0.535	1.29554e-23
CMTM7	1.00631e-27	0.346913	0.821	0.546	1.89528e-23
EIF3I	1.08137e-27	0.273278	0.923	0.825	2.03665e-23
NASP	1.09787e-27	0.333703	0.978	0.847	2.06772e-23
DLGAP5	1.11482e-27	0.277551	0.766	0.394	2.09965e-23
ADSL	1.23387e-27	0.309351	0.905	0.765	2.32386e-23
TIMM50	1.26846e-27	0.293279	0.817	0.599	2.38901e-23
CDIPT	1.30324e-27	0.336118	0.868	0.755	2.45453e-23
SRSF3	1.33822e-27	0.299185	0.993	0.945	2.5204e-23
SHC1	2.6081e-27	0.314628	0.916	0.725	4.91209e-23
RPS4X	2.75802e-27	0.299914	1	0.994	5.19446e-23
UBE2I	2.77617e-27	0.278159	0.963	0.875	5.22864e-23
HMG20B	3.21977e-27	0.269119	0.799	0.543	6.06412e-23
SNRPF	3.43687e-27	0.297573	0.949	0.764	6.47301e-23
FBN2	3.64731e-27	0.321158	0.96	0.759	6.86934e-23
CAST	3.74566e-27	0.385722	0.857	0.723	7.05458e-23
PFDN4	5.5526e-27	0.264866	0.868	0.634	1.04578e-22
TBCA	5.87474e-27	0.264169	0.96	0.905	1.10645e-22
GNL3	6.36979e-27	0.304938	0.802	0.574	1.19969e-22
RPS29	6.50156e-27	0.265324	1	0.995	1.2245e-22
KRT19	7.64801e-27	0.526301	0.919	0.628	1.44043e-22
WARS	9.34579e-27	0.284921	0.773	0.543	1.76019e-22
CSNK1G2	1.79416e-26	0.277234	0.835	0.608	3.37911e-22
RUSC1	2.37104e-26	0.287501	0.802	0.572	4.46561e-22
NME1	2.37341e-26	0.306873	0.868	0.7	4.47008e-22
PTGES3	2.37476e-26	0.289179	0.982	0.938	4.47263e-22
BCAT1	2.66096e-26	0.333351	0.967	0.824	5.01165e-22
PTMS	3.0818e-26	0.294876	0.993	0.969	5.80426e-22
SNHG3	3.54251e-26	0.290985	0.832	0.577	6.67197e-22
EPHB3	6.35889e-26	0.279235	0.652	0.357	1.19763e-21
CMTM6	6.84764e-26	0.327093	0.864	0.723	1.28968e-21
CDC6	9.41349e-26	0.267923	0.634	0.337	1.77294e-21
GANAB	1.04693e-25	0.269895	0.919	0.745	1.9718e-21
AURKB	1.27101e-25	0.306157	0.766	0.439	2.39383e-21
NAMPT	1.29747e-25	0.25583	0.861	0.677	2.44366e-21
MSN	1.40651e-25	0.319924	0.897	0.755	2.64902e-21
IGDCC3	1.5677e-25	0.308003	0.879	0.658	2.95261e-21
SNRPG	1.72595e-25	0.296986	0.952	0.808	3.25065e-21
PSMD7	1.82498e-25	0.290974	0.945	0.87	3.43717e-21
WWP1	1.87324e-25	0.262446	0.769	0.542	3.52806e-21
RBBP4	2.05059e-25	0.30715	0.941	0.815	3.86209e-21
CDK4	2.22368e-25	0.282842	0.952	0.86	4.18807e-21
KDR	2.5752e-25	0.261017	0.685	0.37	4.85013e-21
NHP2	2.87483e-25	0.291689	0.897	0.763	5.41446e-21
CALR	2.98531e-25	0.319242	0.96	0.913	5.62253e-21
UBA52	3.46051e-25	0.302536	1	0.983	6.51752e-21
BCCIP	4.05617e-25	0.280315	0.864	0.673	7.6394e-21
GADD45GIP1	4.22959e-25	0.274224	0.839	0.613	7.96601e-21
ROR1	4.67052e-25	0.375513	0.853	0.682	8.79646e-21
DLC1	4.85988e-25	0.274545	0.817	0.527	9.1531e-21
ANP32A	5.28306e-25	0.260595	0.974	0.908	9.95012e-21
CCNG1	6.34662e-25	0.263558	0.971	0.923	1.19532e-20
SNRPC	8.13124e-25	0.261718	0.927	0.797	1.53144e-20
POLR2E	8.16495e-25	0.267207	0.952	0.881	1.53779e-20
MALT1	8.34039e-25	0.351283	0.799	0.61	1.57083e-20
HMMR	1.13935e-24	0.265469	0.67	0.348	2.14586e-20
NOLC1	1.50528e-24	0.311862	0.894	0.825	2.83505e-20
VAPA	1.5278e-24	0.256675	0.96	0.914	2.87746e-20
ARHGDIA	1.62301e-24	0.278816	0.941	0.802	3.05679e-20
DBF4	1.81111e-24	0.259261	0.762	0.484	3.41104e-20
NEO1	1.99188e-24	0.250406	0.821	0.547	3.75151e-20
CALM1	2.56084e-24	0.276232	0.982	0.941	4.82309e-20
RPS28	2.84298e-24	0.296918	1	0.987	5.35447e-20
HMGB3	3.10465e-24	0.265671	0.894	0.674	5.84729e-20
ATXN2L	3.72036e-24	0.273499	0.916	0.787	7.00692e-20
RPS10	3.78815e-24	0.270348	0.971	0.858	7.13461e-20
SF3B3	4.11656e-24	0.269449	0.941	0.822	7.75314e-20
RCC2	4.30685e-24	0.257674	0.93	0.777	8.11152e-20
YWHAH	4.64777e-24	0.283299	0.89	0.715	8.7536e-20
GMNN	6.19803e-24	0.285317	0.861	0.612	1.16734e-19
G6PC3	6.50353e-24	0.2847	0.949	0.831	1.22487e-19
TOP2A	6.986e-24	0.319179	0.806	0.471	1.31574e-19
LBR	8.02851e-24	0.279813	0.875	0.667	1.51209e-19
SF3B2	9.40782e-24	0.260558	0.93	0.817	1.77187e-19
TUBG1	9.60469e-24	0.251919	0.824	0.633	1.80895e-19
ILF3	1.22668e-23	0.250682	0.985	0.926	2.31033e-19
DERA	1.32258e-23	0.268351	0.813	0.559	2.49095e-19
SNRPA	1.33004e-23	0.276423	0.875	0.658	2.505e-19
ZC3HAV1	1.36639e-23	0.304756	0.927	0.734	2.57345e-19
EIF4A3	1.7318e-23	0.272163	0.875	0.728	3.26168e-19
CENPV	2.06021e-23	0.281983	0.883	0.671	3.88019e-19
PSMC6	3.00396e-23	0.27043	0.912	0.76	5.65766e-19
MKI67	3.14629e-23	0.281122	0.773	0.458	5.92572e-19
R3HDM4	7.24745e-23	0.252517	0.755	0.52	1.36499e-18
CYP26A1	8.6298e-23	0.492389	0.396	0.169	1.62534e-18
MLEC	1.01509e-22	0.256737	0.923	0.804	1.91182e-18
MCM7	1.11409e-22	0.298252	0.93	0.738	2.09829e-18
GPX1	1.15973e-22	0.25926	0.941	0.856	2.18424e-18
PRPF40A	1.25986e-22	0.263219	0.956	0.885	2.37281e-18
HYOU1	1.32143e-22	0.277313	0.908	0.693	2.48878e-18
MCM4	1.33924e-22	0.282058	0.846	0.586	2.52233e-18
SLC25A1	1.41705e-22	0.2574	0.93	0.835	2.66888e-18
NHP2L1	1.74789e-22	0.271377	0.96	0.771	3.29198e-18
NAE1	2.00033e-22	0.258733	0.879	0.739	3.76743e-18
IMPDH2	2.03227e-22	0.263047	0.927	0.781	3.82758e-18
POMP	3.69265e-22	0.261458	0.96	0.897	6.95474e-18
RPL36A-HNRNPH2	5.0619e-22	0.30924	0.894	0.688	9.53359e-18
KIF5C	9.44983e-22	0.258996	0.74	0.465	1.77978e-17
SERPINH1	1.8757e-21	0.275607	0.967	0.894	3.53269e-17
PLK1	2.69476e-21	0.316659	0.7	0.413	5.07532e-17
MYO10	3.4096e-21	0.267514	0.802	0.542	6.42165e-17
SLC25A13	3.45846e-21	0.255849	0.864	0.689	6.51367e-17
AURKAIP1	4.73659e-21	0.265894	0.846	0.666	8.9209e-17
CHD7	6.02004e-21	0.274072	0.919	0.816	1.13381e-16
DBN1	6.63073e-21	0.26866	0.934	0.824	1.24883e-16
ZNF578	7.46971e-21	0.259373	0.777	0.518	1.40684e-16
DNAJB11	9.69499e-21	0.257023	0.747	0.56	1.82595e-16
KHSRP	1.8946e-20	0.253732	0.963	0.907	3.56829e-16
MARS	2.0935e-20	0.269103	0.875	0.799	3.94289e-16
NOP58	2.41575e-20	0.256598	0.916	0.782	4.54982e-16
ASPM	2.87131e-20	0.28845	0.744	0.454	5.40783e-16
TCOF1	7.43606e-20	0.253323	0.832	0.653	1.40051e-15
SNAI2	1.02367e-19	0.29816	0.626	0.361	1.92799e-15
PPP4C	3.43681e-19	0.259298	0.828	0.614	6.47289e-15
PPT1	4.38688e-19	0.250643	0.89	0.775	8.26225e-15
TUBA1B	4.51566e-19	0.262302	1	0.986	8.50479e-15
UBE2C	5.30498e-19	0.304442	0.7	0.427	9.9914e-15
NUS1	8.58945e-19	0.256649	0.864	0.73	1.61774e-14
EIF3K	1.69121e-18	0.255342	0.923	0.876	3.18522e-14
PTPN12	7.12026e-18	0.256001	0.883	0.786	1.34103e-13
HSPA8	1.63915e-17	0.286586	1	0.987	3.08718e-13
CDK1	2.23038e-17	0.326928	0.663	0.43	4.2007e-13
PSMB3	3.60477e-17	0.267457	0.901	0.735	6.78923e-13
SEMA6D	4.48789e-17	0.279497	0.718	0.486	8.45249e-13
RYBP	1.66817e-16	0.254101	0.806	0.663	3.14184e-12
PCDH17	8.14561e-16	0.296738	0.641	0.402	1.53414e-11
TFPI	1.60015e-15	0.328128	0.648	0.414	3.01373e-11
IDS	2.42304e-15	0.267027	0.784	0.629	4.56355e-11
PAPSS1	4.09568e-15	0.268043	0.857	0.717	7.7138e-11
HAPLN1	6.31708e-15	0.286877	0.414	0.214	1.18976e-10
AURKA	7.55711e-14	0.273161	0.557	0.354	1.42331e-09
PERP	4.40199e-11	0.271792	0.85	0.74	8.29072e-07
HIST1H2BK	7.63406e-05	0.258315	0.527	0.399	1

## Sheet: cluster D4_2
	p_val	avg_logFC	pct.1	pct.2	p_val_adj
SOX17	0	1.66074	0.963	0.008	0		as shown in Figure 4
FOXA2	0	1.23075	0.926	0.003	0
LINC00261	0	0.935584	0.691	0.006	0
SP5	2.89603e-246	0.839575	0.741	0.02	5.45439e-242
HNF1B	5.16799e-206	0.347436	0.42	0.004	9.73339e-202
VWF	1.00207e-201	0.59268	0.753	0.03	1.88729e-197
DIO3	2.12868e-196	0.418319	0.432	0.005	4.00915e-192
RASSF10	2.1842e-181	0.256654	0.407	0.005	4.11372e-177
SEMA3G	1.57699e-140	0.486298	0.617	0.03	2.9701e-136
PPFIBP2	9.61415e-138	0.578454	0.716	0.048	1.81073e-133
PRDM1	2.12649e-133	0.384459	0.568	0.026	4.00503e-129
NRCAM	5.59103e-125	0.460725	0.593	0.033	1.05301e-120
ITLN2	1.7223e-106	0.344541	0.494	0.026	3.24378e-102
PAMR1	5.58772e-104	0.543033	0.556	0.036	1.05239e-99
SHISA3	1.55993e-89	0.549413	0.494	0.032	2.93797e-85
KREMEN2	2.94856e-85	0.35074	0.568	0.048	5.55332e-81
GAL3ST1	4.06881e-71	0.343816	0.519	0.049	7.66319e-67
CCKBR	3.24857e-70	1.13552	0.951	0.24	6.11836e-66
MBNL3	1.93522e-62	0.394028	0.543	0.061	3.64479e-58
ITPKB	2.94416e-61	0.363201	0.568	0.068	5.54504e-57
KIT	8.95688e-61	0.695943	0.802	0.162	1.68694e-56
SAMD3	2.29249e-60	0.335337	0.506	0.054	4.31767e-56
SMAGP	3.13124e-60	0.463705	0.679	0.108	5.89739e-56
RAB17	1.76867e-53	0.555899	0.605	0.096	3.33112e-49
SLC16A10	2.31788e-53	0.351904	0.519	0.068	4.36549e-49
GRB7	3.77119e-53	0.324732	0.556	0.076	7.10266e-49
EPCAM	3.56128e-52	1.1173	0.914	0.263	6.70731e-48
ADRA2C	2.06633e-51	0.315692	0.531	0.072	3.89172e-47
DLC1	3.85643e-51	1.31439	1	0.541	7.26319e-47
FAM159B	5.38471e-49	0.494905	0.654	0.124	1.01416e-44
FOXA3	5.39106e-48	0.41017	0.642	0.121	1.01535e-43
PAPSS1	2.61959e-47	1.01847	1	0.722	4.93373e-43
ARHGAP28	4.13091e-47	0.919259	0.914	0.348	7.78015e-43
FZD5	3.83592e-46	0.94627	0.84	0.235	7.22457e-42
NFATC1	9.53517e-46	0.45575	0.568	0.097	1.79585e-41
PTGR1	1.42895e-45	1.37315	0.951	0.524	2.69128e-41
APOE	1.67252e-45	1.08407	1	0.908	3.15002e-41
APOC1	2.51876e-45	0.805747	0.951	0.39	4.74383e-41
FRZB	4.1367e-45	0.534998	0.704	0.161	7.79105e-41
DUSP4	5.85343e-45	0.363366	0.593	0.101	1.10243e-40
FAM184A	8.32714e-45	0.755747	0.84	0.282	1.56833e-40
FAM122C	4.28896e-44	0.408118	0.642	0.128	8.07783e-40
CECR6	2.57292e-43	0.292001	0.494	0.073	4.84584e-39
FAM124A	1.85418e-42	0.413418	0.716	0.158	3.49216e-38
RAB3B	1.87165e-40	1.11064	0.926	0.47	3.52506e-36
NQO1	4.31161e-40	0.868607	0.975	0.501	8.12049e-36
ALPL	6.47676e-40	0.68088	0.877	0.281	1.21983e-35
FGF12	1.98575e-39	0.349703	0.58	0.11	3.73996e-35
GNAI2	5.31975e-39	0.894322	1	0.907	1.00192e-34
FSCN1	1.53406e-38	0.94596	1	0.94	2.88925e-34
FN1	2.90805e-38	1.25507	0.988	0.717	5.47703e-34
UCP2	4.46796e-38	0.918437	0.951	0.511	8.41495e-34
SERPINE2	5.75158e-38	1.11556	1	0.632	1.08325e-33
TCN2	1.17711e-37	0.386633	0.617	0.141	2.21697e-33
FGFR4	2.20145e-37	0.500922	0.617	0.14	4.14621e-33
PRSS8	3.70692e-37	0.37629	0.679	0.163	6.98162e-33
ITGA5	8.56954e-37	0.918072	0.963	0.557	1.61399e-32
IGFBP6	1.71716e-36	0.258988	0.494	0.085	3.2341e-32
FTH1	2.32368e-36	0.75888	1	0.992	4.37641e-32
PREX1	3.85007e-36	0.522471	0.741	0.224	7.25122e-32
OTX2	4.69916e-36	0.716566	0.877	0.333	8.85041e-32
CNTNAP2	5.90773e-36	0.921486	1	0.519	1.11266e-31
ARHGAP24	6.8697e-36	0.384118	0.494	0.09	1.29384e-31
GSTP1	1.28438e-35	0.691998	1	0.95	2.41899e-31
MATN3	2.14524e-35	0.335701	0.556	0.117	4.04034e-31
TUBB2B	2.18447e-35	0.902404	0.988	0.547	4.11424e-31
F11R	5.65093e-35	0.701125	0.877	0.402	1.0643e-30
SALL1	1.48659e-34	0.606728	0.827	0.326	2.79984e-30
TUBB3	1.7937e-34	0.863754	0.938	0.442	3.37826e-30
ATP8A1	2.83062e-34	0.361054	0.58	0.126	5.33118e-30
PERP	4.02395e-34	0.871899	0.975	0.744	7.5787e-30
TYRO3	7.48904e-34	0.780606	0.951	0.594	1.41049e-29
PRODH	9.17761e-34	0.36171	0.605	0.132	1.72851e-29
ERRFI1	1.95727e-33	0.534907	0.765	0.264	3.68632e-29
CAMK2N1	2.28113e-33	0.542393	0.704	0.207	4.29628e-29
PGM1	2.72427e-33	0.817384	0.975	0.789	5.13088e-29
KRT19	4.49993e-33	1.00953	0.988	0.644	8.47517e-29
FTL	1.2774e-31	0.836969	1	0.984	2.40585e-27
QPCT	9.10409e-31	0.253681	0.444	0.082	1.71466e-26
SH3BGRL3	2.46983e-30	0.714324	0.988	0.851	4.65167e-26
TGIF1	3.25164e-30	0.656374	0.951	0.59	6.12414e-26
PDLIM1	3.65578e-30	0.893901	0.988	0.837	6.88529e-26
ROR2	4.55068e-30	0.443549	0.79	0.274	8.57074e-26
AGL	5.22712e-30	0.677482	0.938	0.611	9.84476e-26
LHFPL2	6.04985e-30	0.734007	0.938	0.616	1.13943e-25
TDGF1	1.54049e-29	0.265966	0.519	0.108	2.90136e-25
CD63	3.18128e-29	0.62094	1	0.951	5.99163e-25
SLC2A3	5.82236e-29	1.11841	0.963	0.697	1.09658e-24
VAT1	8.79004e-29	0.651584	1	0.764	1.65552e-24
LY6E	2.9487e-28	0.782281	0.951	0.708	5.55359e-24
NTS	3.03029e-28	0.318534	0.79	0.252	5.70726e-24
UCHL1	5.59691e-28	0.71807	0.988	0.905	1.05412e-23
PHACTR2	8.11472e-28	0.777042	0.951	0.709	1.52833e-23
CAPNS1	1.21531e-26	0.548208	1	0.966	2.28891e-22
ENO1	1.56632e-26	0.55097	1	0.991	2.95001e-22
ETS2	2.66274e-26	0.462081	0.778	0.331	5.015e-22
NCOA4	5.15799e-26	0.806735	0.963	0.831	9.71456e-22
TSKU	6.76973e-26	0.461945	0.79	0.343	1.27501e-21
FGD6	6.7764e-26	0.648908	0.864	0.526	1.27627e-21
IL17RD	7.30681e-26	0.337233	0.593	0.17	1.37616e-21
CNDP2	9.12679e-26	0.64214	0.901	0.603	1.71894e-21
CACHD1	1.03601e-25	0.568366	0.852	0.446	1.95122e-21
CTSL2	1.14127e-25	0.777841	0.963	0.697	2.14947e-21
CAMSAP3	1.32209e-25	0.254204	0.457	0.102	2.49003e-21
SHC1	1.42779e-25	0.616372	0.951	0.737	2.68911e-21
PLK1S1	1.62606e-25	0.523721	0.802	0.365	3.06252e-21
RHPN2	2.5609e-25	0.420191	0.79	0.337	4.82319e-21
NDNL2	1.22494e-24	0.559374	0.84	0.411	2.30705e-20
ZNF614	1.23422e-24	0.506011	0.765	0.347	2.32453e-20
S1PR3	1.76641e-24	0.439279	0.691	0.25	3.32685e-20
CLIC1	1.79796e-24	0.582399	0.975	0.857	3.38629e-20
KRT18	1.85939e-24	0.781691	1	0.809	3.50197e-20
SMOX	1.96472e-24	0.279388	0.469	0.112	3.70035e-20
EPHA2	3.76888e-24	0.330129	0.593	0.172	7.0983e-20
ABHD11	8.22051e-24	0.41316	0.716	0.282	1.54825e-19
GATA3	8.34672e-24	0.493176	0.691	0.263	1.57202e-19
CORO1B	8.8844e-24	0.526466	0.938	0.655	1.67329e-19
DYX1C1	8.96235e-24	0.502241	0.802	0.345	1.68797e-19
ZIC3	1.00223e-23	0.462549	0.741	0.281	1.8876e-19
EPB41L2	1.11167e-23	0.582613	0.926	0.66	2.09372e-19
TUBA1C	1.58672e-23	0.698045	1	0.78	2.98842e-19
HS6ST1	2.04996e-23	0.449209	0.704	0.283	3.8609e-19
KIF26A	2.2414e-23	0.275325	0.568	0.162	4.22145e-19
UGDH	2.33519e-23	0.545446	0.975	0.691	4.3981e-19
ZFP36L2	2.35496e-23	0.672639	0.914	0.602	4.43533e-19
GJA1	7.90638e-23	0.669776	0.975	0.653	1.48909e-18
H2AFY2	1.02425e-22	0.537571	0.963	0.77	1.92907e-18
LINC00294	1.25665e-22	0.439514	0.79	0.384	2.36677e-18
COL4A1	1.60969e-22	0.654647	0.963	0.622	3.0317e-18
TPM3	1.71591e-22	0.546269	0.988	0.853	3.23174e-18
RBM47	2.17939e-22	0.44511	0.63	0.216	4.10466e-18
DHCR24	2.48988e-22	0.628991	0.988	0.712	4.68945e-18
C1orf186	3.87872e-22	0.305635	0.667	0.247	7.30517e-18
CARHSP1	3.89825e-22	0.483805	0.914	0.59	7.34196e-18
ABCC4	4.00883e-22	0.343331	0.481	0.133	7.55023e-18
LIN28A	6.02853e-22	0.633198	1	0.726	1.13541e-17
SMS	7.68781e-22	0.587867	0.988	0.895	1.44792e-17
SLC27A3	8.22616e-22	0.331198	0.642	0.229	1.54931e-17
ETS1	9.86895e-22	0.421263	0.778	0.325	1.85872e-17
LOC100505695	1.01686e-21	0.357365	0.543	0.165	1.91516e-17
EVA1B	1.43424e-21	0.452644	0.815	0.382	2.70125e-17
ITM2C	2.21447e-21	0.489973	1	0.966	4.17074e-17
PODXL	2.93165e-21	0.661953	0.963	0.584	5.52147e-17
TMC6	3.29671e-21	0.287668	0.63	0.215	6.20902e-17
USP54	4.19214e-21	0.432229	0.802	0.404	7.89548e-17
KRT8	4.56923e-21	0.701727	1	0.946	8.6057e-17
FARP1	9.77196e-21	0.533243	0.951	0.763	1.84045e-16
CD81	1.36013e-20	0.451419	0.988	0.961	2.56167e-16
SPATA6	2.17026e-20	0.26627	0.654	0.246	4.08748e-16
LONRF1	2.20271e-20	0.501655	0.815	0.461	4.14858e-16
LEPREL1	2.34002e-20	0.473656	0.827	0.437	4.40719e-16
KIAA1598	2.77427e-20	0.477656	0.753	0.372	5.22507e-16
LRIG3	3.96643e-20	0.260697	0.58	0.185	7.47038e-16
SCD	4.36882e-20	0.501533	1	0.943	8.22823e-16
HLA-B	4.45357e-20	0.607251	0.778	0.419	8.38786e-16
COL18A1	5.13771e-20	0.56638	0.975	0.832	9.67637e-16
ZNF578	6.20489e-20	0.480241	0.864	0.532	1.16863e-15
COLEC12	7.16488e-20	0.51834	0.827	0.426	1.34943e-15
SCNN1A	8.37877e-20	0.313062	0.556	0.157	1.57806e-15
MANEA	8.39956e-20	0.360827	0.642	0.255	1.58197e-15
ID1	9.07425e-20	0.71432	0.963	0.715	1.70904e-15
ALDH2	1.10092e-19	0.494647	0.889	0.62	2.07348e-15
HLA-A	1.28312e-19	0.518605	0.988	0.82	2.41663e-15
STX3	1.46837e-19	0.397476	0.827	0.479	2.76553e-15
TMEM141	1.4726e-19	0.484699	0.914	0.643	2.7735e-15
PTMS	1.61171e-19	0.437055	1	0.97	3.0355e-15
NRXN3	2.23669e-19	0.346607	0.506	0.159	4.21258e-15
SDC3	3.17812e-19	0.46835	0.778	0.416	5.98567e-15
CRMP1	3.52128e-19	0.473243	0.753	0.343	6.63198e-15
SPRED1	3.54813e-19	0.395488	0.802	0.414	6.68255e-15
IDH1	3.81462e-19	0.478984	1	0.874	7.18446e-15
CCNG1	4.05383e-19	0.461302	1	0.925	7.63499e-15
FLNB	4.20596e-19	0.586579	0.914	0.659	7.9215e-15
HLA-E	5.15007e-19	0.37921	0.704	0.298	9.69965e-15
MICAL1	6.53367e-19	0.41059	0.716	0.321	1.23055e-14
KCNMB4	7.58687e-19	0.453628	0.827	0.495	1.42891e-14
FGFR1	7.9626e-19	0.572943	0.975	0.752	1.49968e-14
TNNT1	9.24335e-19	0.346455	0.741	0.327	1.74089e-14
IFI16	1.20424e-18	0.329206	0.519	0.166	2.26807e-14
TUBB2A	1.24825e-18	0.550473	0.852	0.556	2.35096e-14
CYP26A1	1.36177e-18	0.698482	0.543	0.179	2.56475e-14
ZNF737	1.68988e-18	0.379627	0.728	0.373	3.18272e-14
PLP1	1.83246e-18	0.383432	0.593	0.211	3.45125e-14
SSBP3	1.8739e-18	0.429859	0.938	0.802	3.5293e-14
PFKL	2.4161e-18	0.39415	0.852	0.566	4.55048e-14
CRABP2	2.98087e-18	0.479124	0.975	0.628	5.61418e-14
VANGL1	3.68799e-18	0.40238	0.667	0.312	6.94595e-14
ZNF525	4.55027e-18	0.384287	0.753	0.387	8.56998e-14
ABRACL	4.70353e-18	0.533507	0.938	0.644	8.85864e-14
NEO1	7.98713e-18	0.473259	0.864	0.563	1.5043e-13
S100A11	8.01802e-18	0.449009	1	0.784	1.51011e-13
RAB25	8.30909e-18	0.277392	0.543	0.175	1.56493e-13
NIPA1	1.07619e-17	0.396237	0.568	0.219	2.0269e-13
HLA-C	1.10244e-17	0.418292	0.765	0.387	2.07634e-13
ACAA2	1.13136e-17	0.42995	0.951	0.811	2.1308e-13
PPL	1.41066e-17	0.260677	0.457	0.137	2.65684e-13
EEF1A1	1.65332e-17	0.266798	1	1	3.11387e-13
FAM122B	1.92751e-17	0.394199	0.778	0.406	3.63027e-13
TSPAN14	2.28454e-17	0.476496	0.79	0.487	4.3027e-13
PPP2R5A	2.42791e-17	0.442427	0.815	0.52	4.57273e-13
FAM213A	2.71877e-17	0.450932	0.963	0.801	5.12053e-13
RPS3	3.87152e-17	0.387475	1	0.991	7.29162e-13
TM7SF2	3.92154e-17	0.464391	0.852	0.535	7.38584e-13
SALL4	4.40715e-17	0.486386	0.802	0.435	8.30043e-13
CFL1	4.56104e-17	0.302303	1	0.997	8.59026e-13
TP53I11	4.69224e-17	0.492728	0.988	0.768	8.83737e-13
S100A16	4.77837e-17	0.458304	0.667	0.307	8.99958e-13
RHOB	6.32983e-17	0.405826	0.667	0.282	1.19216e-12
MEGF6	7.66414e-17	0.254571	0.531	0.188	1.44346e-12
YTHDC1	7.93494e-17	0.427149	0.938	0.742	1.49447e-12
GPR98	8.00543e-17	0.309418	0.691	0.306	1.50774e-12
S100A13	8.63274e-17	0.555836	0.802	0.472	1.62589e-12
BCL7C	8.85049e-17	0.306578	0.79	0.404	1.6669e-12
RPL27A	9.58825e-17	0.406745	1	0.994	1.80585e-12
PXDN	1.29755e-16	0.496537	0.975	0.878	2.4438e-12
CLDN6	1.30339e-16	0.351554	0.988	0.701	2.4548e-12
WDR86	1.88908e-16	0.302618	0.642	0.266	3.55789e-12
ANXA5	2.04174e-16	0.375133	1	0.934	3.84542e-12
FLII	2.99876e-16	0.38732	0.877	0.62	5.64787e-12
FAM83H	3.1026e-16	0.366245	0.802	0.406	5.84344e-12
CKB	3.1089e-16	0.601903	0.963	0.806	5.8553e-12
TMSB10	3.76393e-16	0.466785	1	0.981	7.08898e-12
FBLN1	4.74577e-16	0.431971	0.975	0.737	8.93818e-12
HDAC7	5.08842e-16	0.427792	0.827	0.592	9.58352e-12
PLEC	5.11308e-16	0.411518	0.901	0.741	9.62997e-12
GSN	5.13542e-16	0.372177	0.778	0.418	9.67205e-12
ACLY	6.85683e-16	0.496551	0.963	0.813	1.29142e-11
SLC25A1	7.70974e-16	0.462732	0.951	0.841	1.45205e-11
BEX1	9.06986e-16	0.675426	0.988	0.812	1.70822e-11
TRO	1.24546e-15	0.420657	0.802	0.509	2.34569e-11
FRMD4A	1.38317e-15	0.277124	0.556	0.217	2.60505e-11
FADS2	1.51258e-15	0.458125	1	0.83	2.84879e-11
CTSD	1.5796e-15	0.47047	0.901	0.738	2.97502e-11
PCBD1	1.89922e-15	0.396	0.926	0.757	3.57699e-11
MGST2	2.18674e-15	0.377458	0.679	0.33	4.11851e-11
PLEKHB1	2.22228e-15	0.322349	0.642	0.28	4.18545e-11
HIATL1	2.55507e-15	0.333812	0.753	0.416	4.81222e-11
WFDC2	3.26323e-15	0.395032	0.654	0.294	6.14596e-11
TSPAN18	3.31919e-15	0.364038	0.704	0.353	6.25136e-11
KLF6	3.53235e-15	0.389558	0.889	0.554	6.65282e-11
RPLP2	3.7955e-15	0.410552	1	0.992	7.14844e-11
C17orf76-AS1	3.87167e-15	0.437513	0.988	0.82	7.29191e-11
ANXA2	4.2447e-15	0.44726	0.988	0.915	7.99447e-11
PRKAB2	4.87939e-15	0.41358	0.765	0.474	9.18984e-11
EPHX1	5.29167e-15	0.358739	0.654	0.34	9.96633e-11
TAGLN2	5.35572e-15	0.488778	0.728	0.424	1.0087e-10
MBOAT7	6.50831e-15	0.334102	0.815	0.53	1.22577e-10
CTSL1	1.03942e-14	0.366188	0.778	0.437	1.95764e-10
LASP1	1.20002e-14	0.463144	0.914	0.754	2.26011e-10
SHISA2	1.63211e-14	0.524153	0.802	0.493	3.07391e-10
GPC4	1.75854e-14	0.355269	0.84	0.478	3.31203e-10
MSH6	2.51334e-14	0.399717	0.938	0.689	4.73362e-10
PPAP2B	2.72445e-14	0.324546	0.704	0.341	5.13123e-10
TMEM123	2.87868e-14	0.518305	0.926	0.807	5.42172e-10
SERPINH1	2.93558e-14	0.384794	1	0.897	5.52888e-10
SHKBP1	3.49199e-14	0.362389	0.84	0.569	6.57682e-10
AMOT	3.5165e-14	0.49151	0.617	0.323	6.62298e-10
DMKN	3.62447e-14	0.351352	0.938	0.628	6.82632e-10
RPS9	3.95603e-14	0.34289	1	0.979	7.45078e-10
AIF1L	4.40035e-14	0.339666	0.802	0.458	8.28761e-10
OLFML2A	4.41546e-14	0.296081	0.642	0.298	8.31607e-10
TKT	4.68511e-14	0.388642	1	0.75	8.82394e-10
ASS1	4.72002e-14	0.398865	0.877	0.456	8.88968e-10
TALDO1	4.72569e-14	0.401655	0.914	0.689	8.90036e-10
INPP4A	5.9879e-14	0.311176	0.778	0.453	1.12776e-09
AGPAT4	7.17334e-14	0.310143	0.691	0.348	1.35103e-09
ENSA	7.4492e-14	0.353766	0.926	0.729	1.40298e-09
FASN	7.49322e-14	0.445752	1	0.868	1.41127e-09
PTPRS	8.28817e-14	0.383006	0.901	0.707	1.56099e-09
MKNK2	9.88067e-14	0.399371	0.864	0.67	1.86092e-09
TRAF5	1.20811e-13	0.343532	0.716	0.375	2.27536e-09
EEF1G	1.51213e-13	0.307539	1	0.99	2.84795e-09
C6orf211	1.74654e-13	0.325331	0.741	0.444	3.28944e-09
GATS	1.77938e-13	0.405328	0.605	0.324	3.35129e-09
RPS21	2.07841e-13	0.333001	1	0.976	3.91447e-09
UBA1	2.25494e-13	0.318458	1	0.973	4.24696e-09
HMGA1	2.41872e-13	0.43992	1	0.915	4.55541e-09
DUSP5	2.45827e-13	0.292596	0.667	0.302	4.6299e-09
FLRT3	2.66158e-13	0.339859	0.667	0.328	5.01282e-09
KDELR1	3.12843e-13	0.366327	1	0.925	5.89208e-09
BCR	3.15023e-13	0.277172	0.654	0.33	5.93314e-09
ZNF611	3.34601e-13	0.296852	0.642	0.323	6.30187e-09
LGALS1	3.54922e-13	0.265825	0.617	0.269	6.6846e-09
GPX3	3.90581e-13	0.357564	0.778	0.443	7.35621e-09
PVRL2	4.52484e-13	0.36361	0.901	0.639	8.52209e-09
DRAM2	5.10442e-13	0.325675	0.79	0.507	9.61367e-09
CCND1	5.13364e-13	0.52734	0.778	0.454	9.6687e-09
SQSTM1	6.28289e-13	0.393762	0.901	0.75	1.18332e-08
PBXIP1	6.36826e-13	0.308827	0.79	0.483	1.1994e-08
VWA5A	7.36888e-13	0.429806	0.778	0.491	1.38786e-08
B4GALT1	7.44894e-13	0.383093	0.741	0.483	1.40293e-08
SGK223	8.23857e-13	0.297123	0.679	0.327	1.55165e-08
NIPSNAP1	8.88219e-13	0.37007	0.975	0.841	1.67287e-08
TBX3	9.92814e-13	0.260556	0.568	0.237	1.86987e-08
SLC25A29	1.29768e-12	0.25458	0.667	0.341	2.44404e-08
PTPN13	1.33433e-12	0.411699	0.938	0.722	2.51307e-08
FAM126A	1.46258e-12	0.460835	0.704	0.489	2.75462e-08
AGPAT6	1.70323e-12	0.335476	0.765	0.465	3.20787e-08
MSN	1.77826e-12	0.329758	0.951	0.762	3.34918e-08
PHC2	2.67541e-12	0.277587	0.741	0.436	5.03886e-08
EPSTI1	2.92659e-12	0.277577	0.531	0.223	5.51193e-08
USB1	3.06737e-12	0.316809	0.765	0.472	5.77709e-08
ANXA4	3.12334e-12	0.276835	0.654	0.339	5.88249e-08
PKM	3.1332e-12	0.32117	1	0.993	5.90106e-08
NLGN2	3.34236e-12	0.382282	0.914	0.701	6.295e-08
TXN	3.99437e-12	0.359252	0.975	0.912	7.52299e-08
ARPC1B	4.06168e-12	0.283429	0.79	0.498	7.64977e-08
RPS18	4.18952e-12	0.359673	1	0.92	7.89055e-08
B4GALT4	4.66678e-12	0.315122	0.691	0.397	8.78941e-08
ANKMY2	4.87354e-12	0.290058	0.716	0.451	9.17882e-08
CALM1	4.94678e-12	0.340797	0.988	0.944	9.31677e-08
INF2	5.92286e-12	0.283342	0.716	0.433	1.11551e-07
RPS28	6.17262e-12	0.374862	1	0.988	1.16255e-07
GDI2	6.2428e-12	0.3017	0.988	0.915	1.17577e-07
GPX4	6.52055e-12	0.343882	1	0.947	1.22808e-07
CPSF1	7.13406e-12	0.363034	0.877	0.739	1.34363e-07
RPLP0	7.65063e-12	0.350844	1	0.988	1.44092e-07
ACTG1	8.59707e-12	0.356846	1	0.99	1.61917e-07
FAM108A1	9.66726e-12	0.278358	0.716	0.405	1.82073e-07
CTNNAL1	9.77287e-12	0.334011	0.802	0.521	1.84062e-07
PCBP1	1.00969e-11	0.277463	1	0.983	1.90165e-07
ECHDC1	1.0213e-11	0.312562	0.753	0.523	1.92351e-07
NOTCH3	1.05081e-11	0.328589	0.877	0.625	1.97909e-07
MXD4	1.10473e-11	0.404794	0.802	0.548	2.08065e-07
PLIN3	1.2036e-11	0.29138	0.889	0.691	2.26687e-07
ZDHHC12	1.35839e-11	0.28029	0.704	0.381	2.55839e-07
MYLIP	1.37909e-11	0.298752	0.642	0.329	2.59737e-07
RPS19	1.39328e-11	0.309659	1	0.99	2.62411e-07
AMOTL1	1.75463e-11	0.286425	0.84	0.573	3.30467e-07
SHISA5	1.89873e-11	0.367583	0.951	0.831	3.57607e-07
ALS2	2.02206e-11	0.270332	0.802	0.522	3.80835e-07
RPL3	2.03232e-11	0.263595	1	0.997	3.82768e-07
VEGFA	2.25389e-11	0.39891	0.901	0.627	4.24497e-07
RPL29	2.29589e-11	0.329949	1	0.984	4.32408e-07
RPS2	2.49953e-11	0.27866	1	0.999	4.70761e-07
CDKN1C	2.58147e-11	0.495828	0.889	0.64	4.86193e-07
APOA1BP	2.84255e-11	0.286405	0.827	0.581	5.35367e-07
RHOA	2.89264e-11	0.265484	1	0.978	5.44799e-07
SPINT2	3.20192e-11	0.361274	1	0.933	6.0305e-07
S100A10	3.26055e-11	0.328068	0.988	0.739	6.14092e-07
RPS12	3.28812e-11	0.306879	1	0.998	6.19284e-07
KIAA1462	3.29764e-11	0.269892	0.667	0.329	6.21077e-07
ZNFX1-AS1	3.79805e-11	0.341023	0.975	0.779	7.15325e-07
PFN1	4.20668e-11	0.28036	1	0.995	7.92285e-07
SFRP1	4.20985e-11	0.300936	1	0.923	7.92883e-07
PPP1CA	6.83851e-11	0.307671	0.901	0.742	1.28797e-06
FGFR3	7.49549e-11	0.285049	0.716	0.406	1.4117e-06
TIMP1	7.61465e-11	0.321443	0.975	0.86	1.43414e-06
VCP	7.74986e-11	0.325797	0.975	0.941	1.45961e-06
RPL28	8.00665e-11	0.347943	1	0.987	1.50797e-06
SPTSSA	8.16286e-11	0.365147	0.877	0.632	1.53739e-06
LPHN2	8.78755e-11	0.306321	0.889	0.699	1.65505e-06
KIAA1522	8.80354e-11	0.270778	0.802	0.535	1.65806e-06
AIDA	8.82678e-11	0.31118	0.938	0.854	1.66244e-06
RPL17	1.10045e-10	0.351314	1	0.991	2.0726e-06
CSNK1G2	1.12904e-10	0.304358	0.802	0.623	2.12644e-06
HMG20B	1.17867e-10	0.30001	0.802	0.559	2.2199e-06
IFITM1	1.44063e-10	0.288907	0.877	0.597	2.71328e-06
DDAH2	1.52723e-10	0.344314	0.901	0.695	2.87639e-06
ASNA1	1.64842e-10	0.298833	0.901	0.704	3.10463e-06
SLC6A8	1.81366e-10	0.309002	0.654	0.372	3.41584e-06
CNN2	2.17406e-10	0.311779	0.975	0.951	4.09462e-06
MAPK3	2.4951e-10	0.330501	0.815	0.594	4.69927e-06
CAPZB	2.60346e-10	0.287094	0.988	0.912	4.90336e-06
AHNAK	2.67274e-10	0.35172	0.951	0.765	5.03383e-06
BSG	3.18225e-10	0.281591	1	0.948	5.99345e-06
SLC29A1	3.38288e-10	0.290529	0.704	0.412	6.37132e-06
VEZT	3.49667e-10	0.339866	0.802	0.634	6.58563e-06
LAPTM4A	3.62337e-10	0.314579	0.951	0.9	6.82426e-06
BCAP31	4.44724e-10	0.279727	0.926	0.748	8.37593e-06
EFCAB14	5.01687e-10	0.306047	0.753	0.514	9.44877e-06
SPAG9	5.27707e-10	0.262523	0.79	0.557	9.93883e-06
SEZ6L2	5.53626e-10	0.253206	0.753	0.449	1.0427e-05
PTPN12	5.55526e-10	0.268616	0.938	0.791	1.04628e-05
MARCKS	5.58117e-10	0.409947	1	0.871	1.05116e-05
HIAT1	6.5002e-10	0.32459	0.716	0.467	1.22425e-05
C8orf58	6.55099e-10	0.257397	0.63	0.328	1.23381e-05
NT5DC1	6.75606e-10	0.290179	0.852	0.696	1.27244e-05
RPL18	6.76066e-10	0.287948	1	0.988	1.2733e-05
YAP1	6.88009e-10	0.294523	0.901	0.829	1.2958e-05
HSD17B4	6.99133e-10	0.351746	0.852	0.697	1.31675e-05
CALM3	7.00401e-10	0.276238	1	0.937	1.31913e-05
PSIP1	7.14265e-10	0.360397	0.951	0.854	1.34525e-05
RBP1	7.20682e-10	0.280992	0.877	0.599	1.35733e-05
RND2	7.50835e-10	0.320106	0.864	0.631	1.41412e-05
RPS14	8.00549e-10	0.297124	1	0.991	1.50775e-05
PTK7	8.23302e-10	0.264552	0.704	0.404	1.55061e-05
ACTR2	8.61925e-10	0.291884	0.914	0.875	1.62335e-05
ABHD4	8.85953e-10	0.336988	0.778	0.589	1.6686e-05
HECTD3	9.0169e-10	0.256958	0.765	0.497	1.69824e-05
COCH	9.01714e-10	0.259641	0.469	0.203	1.69829e-05
FADS1	9.30896e-10	0.310104	1	0.921	1.75325e-05
LRRFIP1	1.01142e-09	0.3189	0.951	0.787	1.90492e-05
RPL13A	1.01992e-09	0.278696	1	0.962	1.92092e-05
FMNL2	1.09689e-09	0.285279	0.679	0.425	2.06588e-05
CDH2	1.16911e-09	0.306467	0.963	0.771	2.2019e-05
ID3	1.19738e-09	0.332835	1	0.854	2.25515e-05
IGFBP4	1.28723e-09	0.280591	0.704	0.421	2.42436e-05
SLC39A14	1.35783e-09	0.334694	0.802	0.588	2.55734e-05
CAP1	1.37044e-09	0.289736	0.963	0.896	2.58109e-05
DDOST	1.38819e-09	0.308695	0.889	0.799	2.61452e-05
FLOT2	1.58129e-09	0.274916	0.877	0.689	2.97819e-05
CDC42EP4	1.84202e-09	0.310044	0.704	0.45	3.46926e-05
ANKRD33B	2.11966e-09	0.399829	0.593	0.345	3.99217e-05
PLTP	2.14652e-09	0.338812	0.914	0.762	4.04275e-05
CYFIP1	2.16819e-09	0.260842	0.938	0.774	4.08357e-05
ARHGAP12	2.55636e-09	0.286041	0.704	0.455	4.81464e-05
SRSF9	2.74813e-09	0.31179	0.79	0.586	5.17582e-05
ESYT1	2.78171e-09	0.257722	0.741	0.484	5.23907e-05
CDKN2AIPNL	2.88587e-09	0.271151	0.864	0.632	5.43526e-05
CD151	2.97842e-09	0.266542	0.938	0.809	5.60956e-05
AP3B1	3.01344e-09	0.263168	0.864	0.671	5.6755e-05
BAZ2A	3.13815e-09	0.289642	0.877	0.749	5.91039e-05
GRINA	3.38583e-09	0.267297	0.852	0.704	6.37687e-05
METAP2	3.90472e-09	0.290191	0.889	0.837	7.35415e-05
DHRS7	4.49604e-09	0.254388	0.778	0.564	8.46784e-05
ENO2	4.54392e-09	0.251524	0.667	0.393	8.55803e-05
UBA5	4.57098e-09	0.276838	0.741	0.523	8.60898e-05
IPO5	4.78845e-09	0.286729	0.975	0.89	9.01857e-05
HDAC1	5.65385e-09	0.272456	0.753	0.54	0.000106485
BTBD2	5.80944e-09	0.264583	0.901	0.764	0.000109415
SAT1	5.96125e-09	0.270542	0.654	0.383	0.000112274
TRIM2	6.37967e-09	0.295739	0.716	0.49	0.000120155
RDBP	7.9564e-09	0.295628	0.802	0.601	0.000149851
DKFZP686I15217	8.06179e-09	0.282758	0.802	0.562	0.000151836
IGFBP2	9.77602e-09	0.278883	0.877	0.631	0.000184122
PTBP3	9.88316e-09	0.282847	0.864	0.719	0.000186139
MCMBP	1.0527e-08	0.285954	0.802	0.592	0.000198265
PPP2CB	1.07059e-08	0.25477	0.938	0.852	0.000201634
PGAM1	1.31085e-08	0.275784	0.914	0.843	0.000246886
KIAA1551	1.3196e-08	0.347634	0.877	0.703	0.000248533
MEX3A	1.40193e-08	0.288273	0.951	0.871	0.00026404
FBLIM1	1.52904e-08	0.299136	0.753	0.523	0.00028798
PSMD2	1.5485e-08	0.320822	0.901	0.832	0.000291644
DIABLO	1.6455e-08	0.286515	0.827	0.608	0.000309913
FERMT2	1.85826e-08	0.309898	0.926	0.811	0.000349985
TMEM219	2.28947e-08	0.267943	0.901	0.745	0.000431198
RUSC1	2.58014e-08	0.308312	0.815	0.586	0.000485943
PRPF40A	2.62183e-08	0.277961	0.914	0.89	0.000493796
VASP	2.87772e-08	0.269142	0.753	0.523	0.00054199
CSTB	2.98661e-08	0.285881	0.988	0.864	0.000562499
WBP5	3.36033e-08	0.281982	0.988	0.719	0.000632885
TMEM9	3.84912e-08	0.271205	0.802	0.655	0.000724944
C14orf1	4.13863e-08	0.273563	0.889	0.722	0.00077947
RPL23A	4.24095e-08	0.253112	1	0.993	0.00079874
IQGAP1	4.32267e-08	0.334668	0.914	0.74	0.000814131
ZMYM4	4.46e-08	0.278695	0.852	0.759	0.000839996
TMEM133	4.46781e-08	0.288913	0.691	0.475	0.000841468
RAB11A	4.91158e-08	0.265141	1	0.891	0.000925048
TUBA1A	5.02092e-08	0.274409	0.988	0.88	0.000945639
SMARCA4	5.24758e-08	0.256606	0.951	0.864	0.000988329
GLUD1	5.37767e-08	0.267433	0.802	0.692	0.00101283
PIK3C2A	5.49144e-08	0.304498	0.901	0.812	0.00103426
SEPN1	5.68464e-08	0.289067	0.815	0.658	0.00107065
PRKCDBP	5.91451e-08	0.2855	0.79	0.506	0.00111394
SERINC5	5.96916e-08	0.308129	0.877	0.719	0.00112423
RAN	7.2478e-08	0.263635	1	0.959	0.00136505
G6PD	7.43414e-08	0.289144	0.84	0.622	0.00140015
RHBDF1	8.84806e-08	0.278625	0.741	0.498	0.00166644
GSTT1	9.3568e-08	0.276844	0.765	0.577	0.00176226
TXNDC12	1.08021e-07	0.251767	0.889	0.766	0.00203447
CDC42EP1	1.18351e-07	0.259962	0.642	0.397	0.00222902
RBM3	1.38099e-07	0.257467	0.975	0.893	0.00260095
B4GALT5	1.38839e-07	0.259718	0.84	0.657	0.00261489
MYO6	1.47332e-07	0.299907	0.852	0.731	0.00277486
SLC7A5	2.25565e-07	0.287183	0.605	0.368	0.00424828
PDE7A	3.05854e-07	0.270723	0.753	0.58	0.00576046
RALBP1	3.42209e-07	0.263772	0.852	0.703	0.00644517
ZMYM6NB	3.63688e-07	0.25603	0.617	0.381	0.0068497
TBC1D9B	4.96039e-07	0.26722	0.815	0.648	0.0093424
ATP1A1	5.01627e-07	0.25258	0.963	0.856	0.00944764
GPS1	5.37554e-07	0.281711	0.84	0.735	0.0101243
PRCP	5.67993e-07	0.262285	0.864	0.749	0.0106976
TRIP6	6.15851e-07	0.270605	0.864	0.697	0.0115989
ZYX	7.95007e-07	0.276846	0.963	0.902	0.0149732
EPT1	9.19906e-07	0.27417	0.728	0.571	0.0173255
PGD	9.52138e-07	0.252899	0.951	0.854	0.0179326
TBCB	1.00278e-06	0.263854	0.914	0.812	0.0188864
YWHAH	1.12453e-06	0.250474	0.864	0.727	0.0211795
MFAP2	1.74023e-06	0.260019	0.926	0.75	0.0327756
GNB2L1	2.33975e-06	0.275748	1	0.836	0.0440669
C22orf28	2.7915e-06	0.255098	0.914	0.698	0.0525752
NEK2	5.61546e-06	0.252275	0.469	0.269	0.105761
NISCH	7.82658e-06	0.260168	0.802	0.749	0.147406
IWS1	9.05501e-06	0.267494	0.802	0.703	0.170542
PTPN14	1.31907e-05	0.251488	0.877	0.742	0.248434
ADM	3.09313e-05	0.277877	0.395	0.214	0.58256
PEG10	6.08504e-05	0.326	0.864	0.734	1

## Sheet: cluster D5
	p_val	avg_logFC	pct.1	pct.2	p_val_adj
C1orf168	1.14576e-228	0.593412	0.755	0.084	2.15792e-224		as shown in Figure 4
CFC1	8.5222e-212	0.903664	0.892	0.158	1.60507e-207
PLSCR5	6.12256e-200	0.438018	0.685	0.075	1.15312e-195
HOXA1	3.53587e-174	0.28813	0.487	0.034	6.65945e-170
PANX2	4.56731e-165	0.636195	0.812	0.172	8.60207e-161
TMEM88	2.74213e-160	1.28581	0.997	0.493	5.16453e-156
PTGIS	9.91225e-155	0.902117	0.971	0.434	1.86687e-150
LINC00379	1.69892e-153	0.271527	0.404	0.025	3.19975e-149
RGS13	2.06261e-143	0.428325	0.366	0.021	3.88473e-139
COL9A2	4.35349e-143	0.616002	0.831	0.208	8.19936e-139
KRT19	9.80539e-142	1.15327	0.997	0.615	1.84675e-137
HOTAIRM1	1.92558e-141	0.252376	0.462	0.043	3.62664e-137
SC5DL	1.99402e-140	1.17793	0.994	0.736	3.75554e-136
DNAH2	1.00697e-139	0.250367	0.471	0.046	1.89653e-135
VIM	8.40999e-137	1.30246	1	0.927	1.58394e-132
CYB5D1	7.25631e-136	1.01631	0.93	0.378	1.36665e-131
SEMA3E	1.03748e-129	0.260581	0.487	0.058	1.95399e-125
CCKBR	2.15549e-125	0.638378	0.774	0.2	4.05964e-121
FAM89A	3.95059e-125	0.646953	0.952	0.324	7.44055e-121
PBX3	6.59831e-120	1.03166	0.997	0.821	1.24273e-115
EMP2	4.50856e-115	0.921087	0.994	0.735	8.49142e-111
TCF4	1.48315e-114	1.02967	0.987	0.788	2.79337e-110
TKT	2.56454e-114	0.824275	0.987	0.731	4.83005e-110
LCP1	5.59875e-114	0.4842	0.701	0.16	1.05447e-109
SPOCK3	2.16822e-112	0.356418	0.596	0.114	4.08362e-108
SRI	3.09572e-108	0.747945	0.987	0.721	5.83048e-104
CALB2	9.806e-107	0.478799	0.723	0.179	1.84686e-102
KIAA1462	3.04815e-105	0.48806	0.85	0.28	5.74089e-101
RARB	2.34126e-104	0.304394	0.65	0.143	4.40953e-100
EPHA4	5.52165e-104	0.608286	0.796	0.258	1.03995e-99
PDGFRA	1.51362e-103	0.874686	0.99	0.63	2.85076e-99
HS3ST3A1	2.96623e-103	0.365655	0.57	0.111	5.5866e-99
SEPT9	3.62335e-100	0.665945	0.997	0.84	6.82421e-96
KEL	1.28708e-99	0.522381	0.904	0.354	2.42409e-95
IRX3	1.02532e-98	0.697448	0.879	0.329	1.93109e-94
HOXB2	1.47305e-98	0.636206	0.952	0.374	2.77434e-94
SDCBP	1.61511e-98	0.637875	0.997	0.823	3.04189e-94
TUBA1A	2.01778e-97	0.806701	0.994	0.871	3.80029e-93
PTPN13	3.92353e-96	0.737108	0.971	0.7	7.38957e-92
ANXA6	7.02912e-96	0.650029	1	0.895	1.32386e-91
LAMA1	1.06306e-94	0.785769	0.994	0.701	2.00217e-90
FTH1	9.71424e-94	0.553019	1	0.992	1.82958e-89
LIX1	1.58881e-93	0.797758	0.975	0.561	2.99237e-89
ANGPTL2	9.29758e-92	0.399924	0.806	0.274	1.75111e-87
MEIS1	1.42669e-91	0.50702	0.873	0.371	2.68702e-87
CTSL2	4.35294e-90	0.776657	0.987	0.672	8.19832e-86
TMSB10	2.34675e-89	0.593609	1	0.979	4.41987e-85
VWA5A	2.28678e-86	0.588698	0.901	0.453	4.30693e-82
CMTM7	4.12986e-86	0.572474	0.939	0.529	7.77818e-82
AMIGO2	9.12984e-85	0.334824	0.691	0.196	1.71951e-80
PLAT	6.73162e-84	0.74393	0.65	0.186	1.26783e-79
STMN1	7.28019e-83	0.526681	1	0.978	1.37115e-78
FAM184A	9.23356e-83	0.339273	0.742	0.247	1.73905e-78
ST3GAL5	1.5175e-82	0.5135	0.803	0.311	2.85806e-78
NGFRAP1	1.59158e-82	0.558033	0.997	0.822	2.99758e-78
KRT8	1.64691e-80	0.7768	1	0.941	3.10179e-76
COLEC12	5.99834e-80	0.433132	0.92	0.381	1.12973e-75
LRP2	1.19554e-78	0.507757	0.866	0.361	2.25168e-74
RHOU	1.20721e-77	0.443493	0.841	0.324	2.27366e-73
APOC1	1.98119e-77	0.350547	0.86	0.354	3.73137e-73
HMGN1	2.48329e-77	0.423331	1	0.978	4.67703e-73
FAM213A	2.55118e-75	0.513308	0.968	0.787	4.80489e-71
CSRP2	1.98553e-74	0.762009	0.997	0.856	3.73956e-70
COL11A1	1.11053e-73	0.447402	0.857	0.361	2.09157e-69
MDK	8.37073e-73	0.575399	1	0.998	1.57654e-68
ARL4C	5.04024e-72	0.568526	0.949	0.574	9.4928e-68
FZD4	1.85524e-71	0.451296	0.885	0.398	3.49416e-67
MARCKS	6.13929e-71	0.564451	0.997	0.861	1.15627e-66
TFPI	1.03541e-70	0.548985	0.847	0.388	1.95009e-66
NPY	1.63775e-69	0.449885	0.449	0.099	3.08455e-65
CLCN5	1.17373e-68	0.6132	0.841	0.463	2.2106e-64
AKR1B15	2.86982e-68	0.373442	0.545	0.15	5.40502e-64
FTL	3.57737e-67	0.529852	1	0.983	6.73761e-63
SOCS2	9.09406e-67	0.323897	0.806	0.333	1.71277e-62
RNASEH2B	1.26298e-66	0.413114	0.898	0.48	2.37869e-62
CCBE1	1.31943e-65	0.346542	0.64	0.217	2.48501e-61
C15orf39	1.99241e-65	0.266558	0.723	0.261	3.7525e-61
DACH1	7.13971e-65	0.378523	0.646	0.222	1.34469e-60
UBA1	1.58455e-64	0.394294	1	0.971	2.98434e-60
KITLG	8.34863e-64	0.35301	0.688	0.246	1.57238e-59
NAALAD2	3.27752e-62	0.279626	0.761	0.301	6.17289e-58
LOC100216479	8.07302e-62	0.358332	0.777	0.333	1.52047e-57
PCDH17	1.333e-61	0.557344	0.834	0.376	2.51057e-57
LEF1	1.95082e-61	0.442011	0.885	0.46	3.67417e-57
S100A11	2.03927e-61	0.515889	0.994	0.766	3.84076e-57
PKIG	1.82322e-60	0.387164	0.885	0.522	3.43385e-56
MAGED1	7.82175e-60	0.379803	1	0.939	1.47315e-55
RHOBTB3	2.58957e-59	0.615076	0.997	0.867	4.8772e-55
AHNAK	3.79329e-59	0.647422	0.978	0.746	7.14429e-55
DLC1	6.30247e-59	0.404001	0.92	0.511	1.18701e-54
METRN	7.16942e-58	0.328073	0.812	0.368	1.35029e-53
UCP2	8.39801e-58	0.426158	0.889	0.481	1.58168e-53
UBB	1.28065e-57	0.361492	1	0.994	2.41198e-53
TPGS2	1.77385e-57	0.373219	0.987	0.812	3.34086e-53
ZNF503	4.95474e-57	0.548218	0.834	0.408	9.33175e-53
MID1	1.89046e-56	0.497388	0.943	0.668	3.5605e-52
FNDC5	1.92925e-56	0.265098	0.64	0.222	3.63354e-52
SERPINB9	2.21016e-56	0.380775	0.984	0.666	4.16262e-52
H2AFY2	3.60215e-56	0.406238	0.984	0.752	6.7843e-52
SFRP5	5.0871e-56	0.651662	0.857	0.425	9.58104e-52
RUNX1T1	1.90693e-55	0.511871	0.984	0.726	3.59151e-51
TSPAN6	2.37792e-55	0.411313	0.975	0.817	4.47858e-51
GATA6	3.5802e-55	0.482422	0.981	0.677	6.74296e-51
H19	4.72537e-55	0.38413	0.994	0.553	8.89977e-51
NMU	1.09488e-54	0.399502	0.748	0.315	2.0621e-50
PROM1	1.27741e-54	0.347672	0.748	0.335	2.40588e-50
PRTG	2.28324e-54	0.58914	0.997	0.745	4.30025e-50
TMTC1	5.37663e-54	0.300205	0.666	0.255	1.01263e-49
RPLP2	2.50509e-53	0.339496	1	0.992	4.71808e-49
BNC2	2.7128e-53	0.354637	0.739	0.321	5.10929e-49
TSPYL2	3.22157e-53	0.368927	0.806	0.405	6.0675e-49
TMEM66	3.57662e-52	0.366719	0.981	0.7	6.73621e-48
LIFR	5.98206e-52	0.492588	0.908	0.591	1.12666e-47
FADS2	6.16564e-52	0.423724	0.99	0.817	1.16124e-47
ISYNA1	1.62373e-51	0.438047	0.997	0.883	3.05814e-47
WBP5	2.51619e-51	0.468502	0.978	0.697	4.73899e-47
SPSB4	2.57059e-51	0.326284	0.863	0.437	4.84144e-47
ARRDC3	5.28036e-51	0.290062	0.806	0.384	9.94502e-47
VAT1	5.97021e-51	0.378622	0.968	0.748	1.12443e-46
SERPINH1	6.74456e-51	0.385721	0.984	0.891	1.27027e-46
PRKD1	7.516e-51	0.278404	0.713	0.31	1.41556e-46
TMSB15A	1.64741e-50	0.40406	0.952	0.589	3.10273e-46
HNRNPM	2.98813e-50	0.373621	0.994	0.91	5.62785e-46
LEPROTL1	9.46453e-50	0.380621	0.943	0.706	1.78255e-45
ALPK2	2.22892e-49	0.420037	0.968	0.579	4.19795e-45
RPS10	2.59246e-49	0.341897	0.994	0.854	4.88264e-45
SLC16A1	2.63503e-49	0.440171	0.984	0.787	4.96282e-45
KDR	3.0522e-49	0.358481	0.774	0.356	5.74851e-45
KIAA1551	3.45758e-49	0.504278	0.92	0.684	6.512e-45
SRP14	5.98182e-49	0.291619	1	0.985	1.12662e-44
ZNF578	6.31736e-49	0.348674	0.866	0.504	1.18981e-44
WASF1	7.00343e-49	0.43334	0.965	0.782	1.31903e-44
RPL19	1.0259e-48	0.302551	1	0.996	1.93217e-44
HNRNPA1	1.03649e-47	0.294971	1	0.99	1.95213e-43
MEIS2	1.03767e-47	0.405203	0.924	0.541	1.95436e-43
HNRNPA2B1	2.08342e-47	0.346378	1	0.988	3.92391e-43
RGS2	2.9164e-47	0.390496	0.596	0.244	5.49275e-43
IRS1	2.99689e-47	0.351842	0.854	0.49	5.64435e-43
H3F3B	7.34661e-47	0.372179	0.997	0.963	1.38366e-42
FIGNL2	8.85884e-47	0.252152	0.752	0.339	1.66847e-42
CALM3	1.54893e-46	0.335349	0.997	0.933	2.91725e-42
GLIPR2	2.63489e-46	0.293879	0.745	0.35	4.96256e-42
PTMS	6.12645e-46	0.368693	1	0.967	1.15386e-41
DDAH2	1.15114e-45	0.374664	0.92	0.676	2.16806e-41
IGFBP3	2.24186e-45	0.441272	0.522	0.184	4.22232e-41
YWHAQ	5.31351e-45	0.307565	1	0.98	1.00075e-40
BMF	1.30568e-44	0.327896	0.838	0.451	2.45912e-40
BAIAP2L1	1.6634e-44	0.276093	0.768	0.378	3.13284e-40
RPL27A	3.46604e-44	0.299816	1	0.993	6.52795e-40
HNRPDL	1.00646e-43	0.3702	0.994	0.806	1.89557e-39
CFL1	4.21421e-43	0.262866	1	0.997	7.93705e-39
ANK3	5.07125e-43	0.539632	0.898	0.661	9.55119e-39
SPAG16	8.88678e-42	0.252779	0.822	0.449	1.67374e-37
ARID3B	2.2858e-41	0.333563	0.93	0.635	4.30507e-37
RPL36A	2.57237e-41	0.326505	0.984	0.817	4.8448e-37
RPS3	2.97152e-41	0.29972	1	0.99	5.59656e-37
SORL1	3.11744e-41	0.322252	0.828	0.429	5.87138e-37
RPS12	5.22551e-41	0.301847	1	0.997	9.84173e-37
YWHAE	5.86024e-41	0.250765	1	0.995	1.10372e-36
HNRNPL	5.92479e-41	0.282116	0.965	0.741	1.11587e-36
IGSF3	1.42625e-40	0.310944	0.904	0.622	2.68619e-36
TMEM185A	3.59836e-40	0.4096	0.917	0.63	6.77714e-36
SEMA6D	4.13304e-40	0.280322	0.866	0.466	7.78417e-36
RPL30	4.29937e-40	0.2518	1	0.997	8.09743e-36
LGR4	4.86207e-40	0.377586	0.946	0.728	9.15723e-36
NEO1	8.71603e-40	0.296724	0.879	0.536	1.64158e-35
ACTB	2.1424e-39	0.405104	1	0.987	4.03499e-35
SLC9A3R1	5.25144e-39	0.276839	0.85	0.498	9.89056e-35
MXD4	7.51736e-39	0.333629	0.85	0.521	1.41582e-34
HSP90B1	9.85761e-39	0.3544	0.997	0.961	1.85658e-34
KCTD12	1.06283e-38	0.625281	0.904	0.597	2.00173e-34
SHFM1	1.81841e-38	0.306899	0.968	0.794	3.42479e-34
SLC7A2	2.23783e-38	0.313582	0.914	0.605	4.21474e-34
KIF5C	2.65596e-38	0.277731	0.831	0.451	5.00223e-34
RPL6	5.40167e-38	0.260894	1	0.994	1.01735e-33
GGH	6.7204e-38	0.309386	0.939	0.618	1.26572e-33
ASH2L	9.12188e-38	0.384525	0.936	0.733	1.71801e-33
TRAPPC1	1.04388e-37	0.289836	0.962	0.798	1.96604e-33
CDH3	1.20217e-37	0.278094	0.866	0.516	2.26416e-33
SERINC3	1.22659e-37	0.421706	0.844	0.584	2.31016e-33
NAV1	1.58802e-37	0.390995	0.946	0.614	2.99089e-33
MT-TM	2.15878e-37	0.295494	0.924	0.614	4.06585e-33
C14orf166	3.37468e-37	0.271352	0.987	0.869	6.35588e-33
FLNA	5.31893e-37	0.326046	1	0.877	1.00177e-32
MYO6	9.77918e-37	0.351562	0.933	0.712	1.84181e-32
CADM1	1.23052e-36	0.313774	0.917	0.625	2.31756e-32
CNN2	1.24845e-36	0.33312	0.997	0.947	2.35134e-32
PRKCSH	2.13444e-36	0.30884	0.949	0.779	4.02e-32
NONO	2.47102e-36	0.261236	1	0.971	4.65393e-32
FBN2	2.9239e-36	0.366631	0.968	0.755	5.50687e-32
TMEM141	7.49152e-36	0.299748	0.927	0.619	1.41095e-31
MYL6	7.81202e-36	0.286454	1	0.992	1.47132e-31
PIK3R3	2.10417e-35	0.261932	0.729	0.371	3.963e-31
IMPAD1	2.2293e-35	0.417713	0.959	0.797	4.19867e-31
RPL7	2.63344e-35	0.256614	1	0.994	4.95982e-31
BZW1	2.64072e-35	0.301256	0.99	0.91	4.97354e-31
FKBP3	2.84417e-35	0.294425	0.99	0.931	5.35671e-31
ODC1	6.19356e-35	0.344361	0.939	0.693	1.1665e-30
UBE2E3	9.09545e-35	0.314884	0.975	0.803	1.71304e-30
FBLN1	1.38733e-34	0.319967	0.971	0.717	2.61289e-30
SNRPE	3.08425e-34	0.281096	0.978	0.824	5.80887e-30
PSMB1	5.18675e-34	0.276158	0.997	0.953	9.76872e-30
KRT18	9.5002e-34	0.373765	0.981	0.795	1.78927e-29
PSMB6	1.53439e-33	0.272379	0.994	0.918	2.88988e-29
FXYD6	2.2324e-33	0.276565	0.955	0.739	4.2045e-29
ERGIC3	4.73307e-33	0.265095	0.99	0.9	8.91427e-29
RBMX	5.48705e-33	0.293692	0.99	0.923	1.03343e-28
RPS19	1.01065e-32	0.26637	1	0.99	1.90346e-28
TUBA1B	1.0508e-32	0.362834	1	0.986	1.97907e-28
RPS11	1.2652e-32	0.254404	1	0.994	2.38288e-28
APOE	1.37617e-32	0.328659	1	0.9	2.59187e-28
NPC2	1.42227e-32	0.281512	0.987	0.886	2.6787e-28
COL5A1	2.38393e-32	0.250503	0.959	0.642	4.48989e-28
HNRNPC	3.65455e-32	0.255473	1	0.987	6.88297e-28
AHSA1	3.79061e-32	0.271957	0.917	0.674	7.13924e-28
GNB2L1	4.39813e-32	0.336625	0.997	0.823	8.28343e-28
ANXA11	5.17253e-32	0.305607	0.901	0.669	9.74194e-28
HNRNPU	5.76748e-32	0.25498	0.994	0.966	1.08625e-27
SH3BGRL3	6.79936e-32	0.287829	0.984	0.84	1.28059e-27
H2AFY	1.13295e-31	0.29053	1	0.91	2.13379e-27
FABP5	1.39219e-31	0.320722	0.968	0.778	2.62205e-27
HLA-A	4.32676e-31	0.303842	0.975	0.808	8.14903e-27
DHCR7	8.96074e-31	0.306759	0.885	0.62	1.68767e-26
H2AFZ	1.56492e-30	0.367778	0.997	0.915	2.94737e-26
MCC	1.64505e-30	0.2544	0.86	0.564	3.09828e-26
TMTC3	2.57212e-30	0.282636	0.86	0.605	4.84433e-26
IP6K2	3.72093e-30	0.250058	0.955	0.734	7.00799e-26
ANP32B	4.54899e-30	0.279606	0.997	0.889	8.56757e-26
MTRNR2L1	1.01531e-29	0.289102	0.978	0.88	1.91224e-25
SERPINB6	1.63778e-29	0.291507	0.92	0.695	3.0846e-25
GUCY1A3	3.13541e-29	0.279479	0.892	0.531	5.90524e-25
RPS20	3.41898e-29	0.253755	1	0.999	6.4393e-25
HNRNPR	1.28158e-28	0.266328	0.987	0.886	2.41372e-24
KIAA0101	1.58218e-28	0.300011	0.914	0.569	2.97988e-24
P4HB	2.06048e-28	0.261465	0.975	0.869	3.88071e-24
XRCC6	5.16756e-28	0.255521	0.984	0.909	9.73259e-24
FDFT1	2.25303e-27	0.277325	0.987	0.864	4.24335e-23
DSC2	3.5194e-27	0.258071	0.92	0.706	6.62844e-23
PGM5P2	5.42299e-27	0.306929	0.889	0.635	1.02137e-22
MCM5	6.12956e-27	0.317652	0.863	0.542	1.15444e-22
ANXA2	1.40604e-26	0.257702	0.997	0.908	2.64813e-22
UTRN	2.41522e-26	0.301878	0.936	0.768	4.54882e-22
MID1IP1	2.86309e-26	0.300903	0.799	0.504	5.39235e-22
NRD1	3.22285e-26	0.286099	0.981	0.741	6.06991e-22
ATP1B3	3.97328e-26	0.283277	0.994	0.881	7.48327e-22
HMGN2	7.76367e-26	0.281645	0.946	0.799	1.46221e-21
LIN28A	1.01044e-25	0.250138	0.994	0.704	1.90306e-21
IFITM3	2.30066e-24	0.270488	0.997	0.938	4.33305e-20
PABPC1	3.26367e-24	0.251897	0.997	0.982	6.1468e-20
PBX1	4.08494e-24	0.268354	0.984	0.912	7.69357e-20
PDLIM7	5.13187e-24	0.257002	0.987	0.797	9.66536e-20
MT-RNR1	8.29677e-24	0.252786	1	0.998	1.56261e-19
PLD3	2.77201e-23	0.271558	0.975	0.86	5.22081e-19
REC8	3.74515e-23	0.311482	0.452	0.222	7.05361e-19
MCM2	3.26201e-22	0.263231	0.857	0.573	6.14366e-18
MCM6	1.78129e-20	0.264546	0.838	0.591	3.35488e-16
ACTG1	1.26814e-19	0.266561	1	0.989	2.38842e-15
HSPA5	1.51074e-17	0.300592	0.994	0.947	2.84532e-13
LDOC1	1.12247e-16	0.300507	0.847	0.655	2.11406e-12
SOX4	1.62019e-16	0.280246	0.997	0.937	3.05146e-12
PCNA	4.25866e-15	0.282459	0.812	0.614	8.02077e-11
MAB21L3	1.32321e-14	0.267016	0.93	0.828	2.49213e-10

## Sheet: cluster D6
	p_val	avg_logFC	pct.1	pct.2	p_val_adj
HOXB2	2.64302e-233	0.905587	0.931	0.312	4.97787e-229		as shown in Figure 4
MDK	2.8552e-218	0.880746	0.998	0.998	5.37749e-214
H19	1.52891e-205	1.66254	0.972	0.507	2.87954e-201
MMP11	2.41304e-199	0.694383	0.714	0.158	4.54473e-195
PRTG	1.02093e-193	1.06731	0.987	0.718	1.92282e-189
PDGFRA	3.2762e-191	1.04548	0.975	0.591	6.1704e-187
ROBO2	9.87352e-181	0.639349	0.742	0.197	1.85958e-176
PBX3	8.5533e-165	0.893763	0.982	0.805	1.61093e-160
FZD4	2.54529e-164	0.693358	0.858	0.348	4.79379e-160
VIM	7.54308e-159	0.92825	0.998	0.919	1.42066e-154
COL11A1	9.35601e-156	0.597698	0.825	0.311	1.76211e-151
DERL3	1.31397e-155	0.536722	0.643	0.155	2.47474e-151
LAMA1	2.49489e-155	0.844384	0.962	0.675	4.69888e-151
ODC1	4.27729e-152	0.718585	0.954	0.661	8.05586e-148
PHGDH	1.0129e-149	0.92857	0.964	0.737	1.90769e-145
SPSB4	4.44989e-145	0.584658	0.85	0.391	8.38093e-141
GAP43	6.686e-145	0.729627	0.75	0.269	1.25924e-140
WFIKKN1	4.38104e-138	0.362022	0.617	0.158	8.25125e-134
HOXB5	1.80611e-137	0.261241	0.425	0.053	3.40163e-133
LIX1	1.18021e-135	0.765301	0.929	0.524	2.22281e-131
SVEP1	2.19095e-135	0.463382	0.75	0.265	4.12644e-131
TMEM88	8.56156e-133	0.607963	0.927	0.451	1.61248e-128
GATA5	3.65475e-127	0.470548	0.719	0.252	6.88336e-123
SERPING1	6.86006e-127	0.555856	0.896	0.545	1.29202e-122
EMP2	3.74383e-126	0.687747	0.97	0.711	7.05113e-122
KCNJ3	1.15834e-124	0.547247	0.706	0.255	2.18162e-120
TUBA1B	1.33456e-120	0.632622	0.998	0.984	2.51352e-116
SFRP5	1.50788e-120	0.659892	0.856	0.375	2.83995e-116
COL1A1	5.87909e-119	0.652596	0.988	0.858	1.10727e-114
CSRP2	1.31193e-118	0.644798	0.983	0.843	2.47089e-114
ANP32B	3.64222e-118	0.513233	0.993	0.878	6.85976e-114
NME4	3.99894e-118	0.51533	0.988	0.97	7.5316e-114
GGH	6.69498e-117	0.528185	0.916	0.586	1.26093e-112
TNC	2.64445e-114	0.473437	0.924	0.437	4.98055e-110
LCP1	2.06258e-112	0.342569	0.55	0.133	3.88466e-108
CPE	3.14725e-110	0.627338	0.945	0.658	5.92753e-106
RPL3	4.33672e-109	0.360005	0.998	0.997	8.16777e-105
RPLP0	2.26881e-106	0.406352	0.995	0.987	4.27307e-102
ARL4C	2.99657e-106	0.648794	0.888	0.546	5.64373e-102
PTN	1.20923e-104	0.620379	0.869	0.546	2.27747e-100
H3F3B	2.50529e-104	0.45498	0.997	0.96	4.71846e-100
EEF1G	3.60897e-104	0.35365	0.992	0.99	6.79713e-100
NMU	4.5287e-104	0.462183	0.702	0.275	8.52935e-100
KRT18	7.70577e-104	0.651867	0.972	0.776	1.4513e-99
HMGN1	2.9528e-103	0.383275	0.992	0.978	5.56131e-99
GNB2L1	1.98921e-102	0.482049	0.974	0.808	3.74648e-98
EIF3F	1.05189e-101	0.440123	0.983	0.931	1.98114e-97
ID2	4.18906e-100	0.645594	0.967	0.772	7.88968e-96
RPL7A	7.91164e-97	0.364323	0.998	0.997	1.49008e-92
LHX2	7.29205e-96	0.369226	0.34	0.051	1.37339e-91
STMN1	1.03689e-95	0.461561	0.995	0.977	1.95288e-91
TMSB15A	5.76022e-95	0.500571	0.906	0.558	1.08488e-90
RPL4	4.62783e-94	0.346192	1	0.998	8.71605e-90
C15orf39	5.09293e-91	0.288664	0.626	0.231	9.59203e-87
FNDC5	2.55478e-90	0.346473	0.574	0.189	4.81167e-86
NID2	4.47712e-90	0.52249	0.881	0.508	8.43222e-86
CYB5D1	4.20698e-89	0.380127	0.767	0.353	7.92342e-85
KCTD12	4.6716e-89	0.733619	0.889	0.565	8.79849e-85
TBX2	1.26752e-88	0.463651	0.648	0.253	2.38725e-84
EPHB2	1.79221e-88	0.31939	0.607	0.218	3.37545e-84
RPL13	3.1425e-88	0.331323	0.998	0.999	5.91858e-84
PLCE1	1.80202e-86	0.296375	0.628	0.239	3.39393e-82
KEL	7.43333e-86	0.399582	0.744	0.329	1.39999e-81
CCDC34	1.43361e-85	0.523196	0.815	0.492	2.70005e-81
HMGB2	1.43994e-85	0.718718	0.879	0.615	2.71197e-81
GATA6	3.49119e-84	0.462795	0.94	0.651	6.57531e-80
RPS2	4.94853e-84	0.343102	1	0.999	9.32006e-80
MEIS2	9.66316e-84	0.490445	0.881	0.507	1.81996e-79
ANGPTL2	2.05815e-83	0.290747	0.653	0.249	3.87632e-79
METRN	2.65157e-83	0.347841	0.714	0.34	4.99396e-79
KRT8	3.61682e-83	0.5404	0.993	0.936	6.81191e-79
HMGN2	6.86273e-83	0.438586	0.95	0.781	1.29253e-78
RELN	3.06348e-82	0.511027	0.863	0.482	5.76975e-78
FLRT3	1.0612e-80	0.371275	0.643	0.263	1.99867e-76
MCC	6.76685e-80	0.415325	0.851	0.532	1.27447e-75
RPL5	1.08017e-78	0.290004	1	1	2.03438e-74
MYH10	2.62849e-78	0.450938	0.99	0.95	4.9505e-74
HNRNPA1	3.68977e-78	0.333109	0.997	0.989	6.94931e-74
MEST	4.16649e-78	0.430617	0.818	0.45	7.84718e-74
CTSL2	5.53568e-78	0.529187	0.921	0.652	1.04259e-73
FTH1	6.84195e-78	0.342432	1	0.991	1.28861e-73
IER5L	9.49195e-78	0.362224	0.668	0.296	1.78771e-73
LRRC32	3.63983e-77	0.26653	0.552	0.191	6.85526e-73
SEPT9	8.49918e-77	0.406641	0.979	0.826	1.60074e-72
H2AFV	2.46472e-76	0.383795	0.949	0.827	4.64206e-72
KRT19	1.73632e-75	0.369522	0.937	0.584	3.27018e-71
RPS3A	7.31846e-75	0.281049	1	0.998	1.37836e-70
EIF3L	9.93222e-75	0.339464	0.988	0.961	1.87063e-70
TSHZ2	1.30932e-74	0.292502	0.562	0.204	2.46598e-70
RPS8	2.1355e-74	0.307637	1	0.997	4.02201e-70
GUCY1A3	2.38555e-74	0.346149	0.896	0.488	4.49294e-70
RBMX	4.78441e-74	0.40362	0.974	0.92	9.01096e-70
YWHAQ	4.85503e-73	0.310925	0.995	0.979	9.14396e-69
RHOU	2.78684e-72	0.310881	0.688	0.301	5.24874e-68
RPL15	4.23843e-72	0.263648	1	0.998	7.98266e-68
EIF3E	7.04952e-71	0.345918	0.98	0.947	1.32771e-66
WASF1	1.59104e-70	0.415674	0.922	0.771	2.99657e-66
LGR4	2.32585e-70	0.491538	0.898	0.714	4.38051e-66
KIAA0101	4.20492e-70	0.45026	0.901	0.532	7.91954e-66
RRM1	2.05131e-69	0.399922	0.843	0.57	3.86344e-65
RPS14	3.23805e-69	0.320281	1	0.989	6.09855e-65
LSM4	5.17275e-69	0.345535	0.974	0.868	9.74236e-65
EEF1B2	6.32596e-69	0.318911	0.993	0.975	1.19143e-64
SC5DL	1.17524e-68	0.513258	0.937	0.719	2.21344e-64
FXYD6	5.73111e-67	0.385312	0.931	0.72	1.0794e-62
PCOLCE	7.29943e-67	0.422107	0.79	0.499	1.37477e-62
SLITRK4	1.70554e-66	0.36105	0.694	0.353	3.21221e-62
BIRC5	8.15286e-66	0.357312	0.711	0.372	1.53551e-61
ARRDC3	1.49014e-65	0.274556	0.721	0.356	2.80654e-61
FBLN1	7.00777e-65	0.401794	0.917	0.701	1.31984e-60
CBLN2	8.26706e-65	0.296283	0.41	0.119	1.55702e-60
PDE3A	1.26788e-64	0.412431	0.679	0.345	2.38792e-60
RPS4X	1.51162e-64	0.28257	0.998	0.993	2.84698e-60
HNRPDL	2.19031e-63	0.37946	0.965	0.791	4.12523e-59
RPS18	2.78845e-63	0.405788	0.988	0.906	5.25177e-59
EZH2	4.22637e-63	0.338958	0.795	0.522	7.95994e-59
ALDH7A1	4.94791e-63	0.349542	0.939	0.842	9.31889e-59
ISYNA1	5.40121e-63	0.409635	0.959	0.879	1.01726e-58
RPS19	6.31583e-63	0.30107	0.998	0.989	1.18952e-58
ID3	1.91742e-62	0.468228	0.983	0.827	3.61127e-58
SRP9	2.5529e-62	0.298046	0.988	0.972	4.80812e-58
RPL6	6.62712e-62	0.266465	0.998	0.994	1.24815e-57
SFPQ	7.18451e-62	0.371026	0.965	0.896	1.35313e-57
ZNF503	8.08425e-62	0.37958	0.74	0.381	1.52259e-57
SMC4	3.85772e-61	0.496303	0.911	0.728	7.26562e-57
COLEC12	4.50756e-61	0.284013	0.744	0.361	8.48955e-57
TUBB	3.24642e-60	0.378523	0.998	0.987	6.11432e-56
RPL19	3.7612e-60	0.267517	1	0.995	7.08385e-56
ARID3B	1.2429e-59	0.356953	0.86	0.617	2.34088e-55
HNRNPH3	1.63335e-59	0.349004	0.962	0.885	3.07625e-55
SHROOM3	7.44327e-59	0.313918	0.643	0.344	1.40187e-54
H1FX	9.35575e-59	0.399124	0.962	0.906	1.76206e-54
CBFA2T2	1.00111e-58	0.409528	0.724	0.449	1.8855e-54
MARCKS	1.76226e-58	0.380295	0.977	0.85	3.31904e-54
RPS6	2.21448e-58	0.312873	0.998	0.997	4.17076e-54
NXPH2	2.67311e-58	0.254176	0.59	0.258	5.03453e-54
PTGIS	3.95849e-58	0.253652	0.777	0.418	7.45542e-54
SDCBP	4.46729e-58	0.353873	0.945	0.815	8.41369e-54
SMC3	1.20861e-57	0.361655	0.931	0.82	2.2763e-53
RPL10A	1.08826e-56	0.262354	1	0.997	2.04963e-52
MELK	3.54677e-56	0.351646	0.698	0.403	6.67999e-52
NCAPD2	4.9318e-56	0.392341	0.833	0.583	9.28856e-52
DSC2	1.47395e-55	0.327458	0.889	0.689	2.77604e-51
ID1	1.56355e-55	0.430379	0.906	0.677	2.94478e-51
BMF	1.81838e-55	0.280647	0.76	0.425	3.42474e-51
GATA4	2.22418e-55	0.450466	0.957	0.713	4.18903e-51
RNASEH2A	6.02471e-55	0.320236	0.86	0.556	1.13469e-50
IL6ST	1.15176e-54	0.36324	0.937	0.696	2.16923e-50
FTL	1.6447e-54	0.42949	0.997	0.982	3.09762e-50
MLF1IP	6.35387e-54	0.273276	0.707	0.381	1.19669e-49
RDBP	2.3747e-53	0.277817	0.825	0.553	4.47251e-49
ANLN	2.60997e-53	0.391308	0.749	0.47	4.91562e-49
PTPN13	4.41585e-53	0.368319	0.874	0.692	8.3168e-49
RPLP2	1.84191e-52	0.271383	0.998	0.991	3.46904e-48
SEMA6D	2.53758e-52	0.303562	0.765	0.444	4.77928e-48
NAALAD2	2.84023e-52	0.26012	0.598	0.287	5.34928e-48
CENPF	3.91055e-52	0.636411	0.815	0.537	7.36514e-48
BST2	4.04631e-52	0.279349	0.547	0.251	7.62082e-48
SORL1	5.08998e-52	0.25423	0.757	0.4	9.58647e-48
RPL41	8.23216e-52	0.275442	1	1	1.55044e-47
AKR1B1	6.21955e-51	0.28734	0.914	0.747	1.17139e-46
COL6A2	6.68076e-51	0.332061	0.869	0.651	1.25825e-46
GINS2	7.583e-51	0.349774	0.729	0.42	1.42818e-46
ERGIC3	9.53142e-51	0.269903	0.964	0.896	1.79515e-46
TOP2A	8.68549e-50	0.795086	0.722	0.446	1.63583e-45
CENPH	1.09178e-49	0.253326	0.81	0.5	2.05625e-45
TMEM66	1.24654e-49	0.275197	0.921	0.681	2.34774e-45
MAD2L1	1.46584e-49	0.338719	0.719	0.426	2.76077e-45
XPO1	2.63394e-49	0.291681	0.955	0.897	4.96077e-45
CLCN5	2.74343e-49	0.284995	0.74	0.443	5.16697e-45
TGFB2	2.92503e-49	0.287738	0.788	0.431	5.50899e-45
SMAD6	6.29073e-49	0.389375	0.84	0.594	1.1848e-44
UBE2E3	6.94119e-49	0.301693	0.947	0.79	1.3073e-44
CALM3	7.47161e-49	0.254303	0.972	0.931	1.4072e-44
CDK1	1.194e-48	0.604813	0.666	0.398	2.24878e-44
CCNB2	1.78269e-48	0.499199	0.795	0.522	3.35752e-44
MEIS1	2.025e-48	0.262266	0.671	0.361	3.81389e-44
HNRNPA2B1	2.73284e-48	0.26762	0.997	0.987	5.14703e-44
H2AFY	3.22017e-48	0.278779	0.979	0.905	6.06488e-44
RPS3	3.50629e-48	0.264113	1	0.989	6.60374e-44
MST4	4.66066e-48	0.342501	0.889	0.638	8.7779e-44
PFN2	4.77981e-48	0.265016	0.99	0.956	9.0023e-44
TMSB10	5.45571e-48	0.301112	0.997	0.978	1.02753e-43
ZWINT	5.94917e-48	0.278456	0.699	0.406	1.12047e-43
TIMELESS	6.1384e-48	0.259709	0.75	0.462	1.15611e-43
CPS1	8.33682e-48	0.283282	0.689	0.398	1.57016e-43
IFITM3	9.5685e-48	0.312216	0.98	0.935	1.80213e-43
DDAH2	1.29845e-47	0.303995	0.855	0.663	2.4455e-43
SKA2	1.70825e-47	0.286363	0.886	0.721	3.21731e-43
ORC6	2.94322e-47	0.335622	0.752	0.514	5.54325e-43
MT-TM	4.36557e-47	0.325446	0.838	0.599	8.22212e-43
DHFR	7.30886e-47	0.38104	0.889	0.682	1.37655e-42
RPL27A	8.12948e-47	0.252387	0.997	0.993	1.53111e-42
HNRNPR	8.71838e-47	0.280077	0.962	0.881	1.64202e-42
CREM	1.29733e-46	0.311456	0.851	0.571	2.44338e-42
XRCC6	1.4386e-46	0.265265	0.964	0.905	2.70945e-42
H2AFZ	1.53071e-46	0.370556	0.987	0.908	2.88294e-42
HP1BP3	1.53257e-46	0.307401	0.914	0.792	2.88645e-42
NASP	2.35677e-46	0.329088	0.969	0.831	4.43874e-42
DSG2	3.14693e-46	0.303245	0.936	0.817	5.92693e-42
RPS11	3.39205e-46	0.272171	0.998	0.994	6.38859e-42
COL6A1	3.59432e-46	0.309887	0.979	0.916	6.76954e-42
RPLP1	4.03086e-46	0.255448	0.997	0.998	7.59173e-42
CLSPN	7.64458e-46	0.252939	0.658	0.355	1.43978e-41
ZNF697	1.3657e-45	0.271262	0.669	0.39	2.57216e-41
CENPK	1.45079e-45	0.287368	0.655	0.37	2.73242e-41
LAMB1	1.12635e-44	0.341676	0.876	0.638	2.12137e-40
CKS1B	1.20085e-44	0.396107	0.937	0.768	2.26168e-40
FANCI	1.41403e-44	0.263809	0.64	0.362	2.66319e-40
SLC7A3	2.43021e-44	0.263116	0.757	0.411	4.57705e-40
FUS	2.81331e-44	0.290591	0.952	0.886	5.29858e-40
PNRC2	3.53828e-44	0.30244	0.932	0.818	6.664e-40
PTPRF	4.7602e-44	0.27197	0.934	0.801	8.96537e-40
PMEL	7.87658e-44	0.297466	0.588	0.306	1.48348e-39
CENPE	1.18759e-43	0.50734	0.641	0.384	2.2367e-39
NT5DC2	1.62585e-43	0.293549	0.964	0.843	3.06213e-39
MYBL2	1.90942e-43	0.300704	0.759	0.446	3.5962e-39
TRIM27	2.217e-43	0.318556	0.85	0.69	4.17549e-39
TTC28	3.30408e-43	0.280198	0.788	0.556	6.2229e-39
RPL35	4.24419e-43	0.277543	0.998	0.989	7.99351e-39
TMPO	5.7483e-43	0.306722	0.911	0.747	1.08263e-38
IRS1	1.0086e-42	0.301092	0.726	0.479	1.8996e-38
SMARCE1	1.05635e-42	0.252091	0.954	0.889	1.98952e-38
NPC2	1.95266e-42	0.281812	0.964	0.88	3.67763e-38
KIF2C	2.44372e-42	0.310626	0.526	0.265	4.60251e-38
RBP1	2.56019e-42	0.267406	0.82	0.554	4.82187e-38
CDK5RAP3	1.32042e-41	0.280197	0.833	0.647	2.48688e-37
AHNAK	2.44484e-41	0.367977	0.927	0.731	4.60462e-37
NDC80	2.65657e-41	0.332884	0.478	0.239	5.00339e-37
ZCRB1	2.96138e-41	0.270089	0.927	0.788	5.57747e-37
PBX1	6.83643e-41	0.320506	0.955	0.91	1.28757e-36
CBX5	8.10842e-41	0.258209	0.979	0.961	1.52714e-36
NAV1	1.09041e-40	0.492786	0.817	0.606	2.05367e-36
TXNIP	1.63671e-40	0.253451	0.901	0.637	3.08257e-36
RPS16	1.68053e-40	0.25699	0.998	0.99	3.16512e-36
SMC1A	1.84336e-40	0.28298	0.889	0.736	3.47179e-36
GLTSCR2	2.12183e-40	0.266599	0.906	0.756	3.99626e-36
TMEM141	2.84976e-40	0.258352	0.828	0.607	5.36723e-36
PRC1	3.59594e-40	0.373019	0.638	0.402	6.77259e-36
PABPC1	4.02352e-40	0.253759	0.997	0.98	7.57789e-36
NRIP1	7.09035e-40	0.279541	0.712	0.464	1.3354e-35
RPL29	1.12646e-39	0.264011	0.997	0.981	2.12157e-35
SEC11A	1.57111e-39	0.250172	0.974	0.908	2.95903e-35
MKI67	2.35696e-39	0.460032	0.693	0.436	4.43909e-35
RABL6	3.31303e-39	0.265296	0.893	0.751	6.23976e-35
PCDH17	4.00151e-39	0.315219	0.65	0.368	7.53644e-35
NUF2	8.86737e-39	0.25471	0.506	0.261	1.67008e-34
NR2F2	2.08329e-38	0.310597	0.825	0.514	3.92367e-34
ACTG1	2.6732e-38	0.32604	1	0.988	5.03471e-34
RPS20	6.13168e-38	0.259496	1	0.998	1.15484e-33
SOX4	9.49788e-38	0.365713	0.97	0.937	1.78883e-33
NUSAP1	1.09797e-37	0.429903	0.689	0.451	2.06792e-33
SPAG5	1.75975e-37	0.271352	0.587	0.349	3.31432e-33
LIN28B	1.99374e-37	0.263209	0.906	0.647	3.75501e-33
NCAPG	2.53643e-37	0.261163	0.517	0.269	4.77712e-33
POLD2	6.20108e-37	0.270099	0.841	0.658	1.16791e-32
CKAP2	9.28449e-37	0.394033	0.783	0.627	1.74864e-32
BRD8	1.06172e-36	0.260287	0.745	0.558	1.99965e-32
HIST1H4C	1.15941e-36	0.645665	0.792	0.572	2.18364e-32
SRSF2	1.43351e-36	0.280057	0.979	0.942	2.69987e-32
C17orf76-AS1	1.65921e-36	0.269396	0.965	0.791	3.12496e-32
MCM7	1.79537e-36	0.309646	0.914	0.717	3.38139e-32
BRI3	1.82246e-36	0.263144	0.952	0.861	3.43243e-32
ASPM	6.36697e-36	0.460483	0.673	0.433	1.19916e-31
DEPDC1	6.40345e-36	0.314853	0.506	0.271	1.20603e-31
CDCA8	7.27158e-36	0.261895	0.46	0.231	1.36953e-31
SRI	1.08683e-35	0.269927	0.878	0.716	2.04694e-31
SSRP1	2.32666e-35	0.252388	0.896	0.757	4.38203e-31
CDCA4	1.01102e-34	0.268648	0.719	0.488	1.90415e-30
SMARCA4	2.7894e-34	0.252045	0.932	0.85	5.25356e-30
CENPV	3.5489e-34	0.285484	0.851	0.651	6.68399e-30
NAA38	4.78817e-34	0.254816	0.727	0.5	9.01804e-30
TROAP	6.3381e-34	0.301726	0.577	0.337	1.19372e-29
FOXP1	8.30061e-34	0.26307	0.898	0.73	1.56334e-29
PHIP	1.10152e-33	0.260347	0.944	0.864	2.07461e-29
SLBP	1.22114e-33	0.27558	0.8	0.606	2.2999e-29
DCP1A	5.61799e-33	0.251224	0.818	0.609	1.05809e-28
RRM2	7.78767e-33	0.314303	0.691	0.46	1.46673e-28
AURKB	1.61502e-32	0.330438	0.668	0.42	3.04173e-28
UBE2C	2.71402e-32	0.427491	0.641	0.405	5.11159e-28
KIF23	1.51349e-31	0.357197	0.524	0.323	2.8505e-27
SLC5A3	6.21513e-31	0.251806	0.772	0.587	1.17056e-26
KIF11	1.11482e-30	0.315189	0.613	0.396	2.09966e-26
CCNB1	6.34295e-30	0.475962	0.676	0.481	1.19463e-25
RAD21	6.51792e-29	0.251479	0.954	0.906	1.22759e-24
PTTG1	1.16726e-28	0.373551	0.727	0.527	2.19842e-24
H2AFX	7.27389e-28	0.271018	0.646	0.468	1.36996e-23
PRR11	1.03232e-27	0.28583	0.689	0.495	1.94426e-23
TTK	7.28239e-27	0.269683	0.517	0.311	1.37157e-22
MCM3	8.26174e-27	0.262065	0.82	0.642	1.55602e-22
RPS21	1.21145e-26	0.273667	0.998	0.971	2.28165e-22
TPX2	2.53423e-26	0.297948	0.607	0.407	4.77296e-22
DLGAP5	5.20339e-26	0.329076	0.597	0.385	9.80006e-22
KIF20A	1.05612e-25	0.327175	0.496	0.305	1.9891e-21
CTSB	3.53993e-25	0.25757	0.831	0.683	6.66711e-21
TACC3	8.79146e-25	0.304471	0.661	0.455	1.65578e-20
KIF20B	1.57699e-24	0.282279	0.696	0.514	2.97011e-20
CCNA2	3.42715e-24	0.313962	0.582	0.388	6.45469e-20
REC8	4.27812e-24	0.252062	0.39	0.21	8.05741e-20
BUB1B	4.92379e-24	0.259337	0.603	0.388	9.27347e-20
KIF14	1.15002e-23	0.269092	0.512	0.321	2.16594e-19
CKAP5	1.46025e-20	0.273072	0.833	0.74	2.75023e-16
CDC20	1.54218e-19	0.269941	0.547	0.371	2.90454e-15
PLK1	1.42405e-17	0.373416	0.567	0.407	2.68205e-13
TUBB4B	9.67037e-15	0.256947	0.711	0.612	1.82132e-10
ARL6IP1	1.03606e-14	0.346634	0.858	0.777	1.95132e-10
TP53I11	1.92777e-12	0.261803	0.848	0.755	3.63077e-08
HAPLN1	0.228047	0.378909	0.248	0.227	1

## Sheet: cluster  D10_1
	p_val	avg_logFC	pct.1	pct.2	p_val_adj
GLIPR1	7.69845e-143	0.315084	0.359	0.009	1.44993e-138		as shown in Figure 4
COL6A3	1.42408e-138	1.12086	0.648	0.055	2.68211e-134
ANXA1	1.19858e-106	1.23582	0.898	0.168	2.25741e-102
CDKN2B	1.21681e-98	0.486307	0.43	0.031	2.29175e-94
KCNE4	2.01194e-94	0.267055	0.25	0.007	3.78929e-90
WISP1	2.0756e-82	0.566525	0.477	0.049	3.90918e-78
CTHRC1	1.2577e-81	1.12958	0.828	0.196	2.36876e-77
SLN	1.30317e-80	1.09266	0.531	0.066	2.4544e-76
CCDC3	4.93386e-79	1.0635	0.805	0.193	9.29244e-75
IGFBP7	1.32395e-78	1.96392	0.875	0.241	2.49353e-74
SYNPO	1.0756e-76	0.977844	0.75	0.169	2.02579e-72
COL3A1	1.27728e-76	2.01299	1	0.494	2.40562e-72
PEAR1	6.55908e-70	0.295146	0.445	0.052	1.23534e-65
FN1	4.0927e-68	2.24585	1	0.712	7.70818e-64
PDLIM3	3.1396e-66	1.71037	0.984	0.462	5.91312e-62
CD248	5.73056e-66	0.361363	0.508	0.075	1.07929e-61
GUCY1A2	6.33682e-66	0.737736	0.742	0.171	1.19348e-61
SERPINE1	1.60552e-65	0.973311	0.508	0.075	3.02384e-61
SULF1	1.88877e-65	1.49452	0.781	0.216	3.55731e-61
COL4A1	8.0218e-65	1.41662	0.992	0.616	1.51083e-60
SPARC	1.49136e-64	1.25958	1	0.954	2.80882e-60
COL4A2	1.96559e-64	1.35136	1	0.816	3.70199e-60
PENK	2.03438e-62	0.648078	0.195	0.008	3.83154e-58
COL1A1	5.40863e-62	1.6095	1	0.878	1.01866e-57
ITGAV	1.68438e-61	1.14385	0.977	0.669	3.17236e-57
ITGA11	7.3645e-60	0.347521	0.328	0.031	1.38703e-55
SH2D3C	5.3157e-59	0.559254	0.648	0.145	1.00116e-54
COL8A1	7.10472e-59	0.385776	0.383	0.044	1.3381e-54
COL1A2	4.35804e-58	1.60877	1	0.82	8.20793e-54
KLF6	1.89397e-57	1.32841	0.953	0.546	3.56711e-53
CALD1	4.12388e-57	1.22837	1	0.904	7.76691e-53
MICAL2	1.1324e-55	1.29993	0.969	0.554	2.13277e-51
ARHGDIB	1.47346e-55	0.397984	0.422	0.06	2.77511e-51
PAPPA	6.15124e-55	0.773374	0.648	0.157	1.15852e-50
PDGFRB	6.24885e-54	0.541334	0.672	0.172	1.17691e-49
PTPRE	7.44839e-54	0.25446	0.375	0.047	1.40283e-49
HAPLN1	1.00178e-53	1.64081	0.719	0.21	1.88675e-49
BGN	1.60011e-52	0.842066	0.594	0.138	3.01365e-48
CDH11	1.77225e-52	0.97812	0.922	0.482	3.33785e-48
IL33	8.78816e-52	0.260084	0.133	0.004	1.65516e-47
ITGB1	1.78617e-51	0.811931	0.984	0.966	3.36407e-47
ETS1	2.18829e-51	0.831648	0.812	0.317	4.12142e-47
COL5A1	2.86128e-51	1.00738	0.984	0.661	5.38894e-47
LMCD1	5.96966e-51	0.41582	0.508	0.093	1.12433e-46
ACTA2	8.79133e-51	1.55049	0.953	0.519	1.65576e-46
TMSB4X	9.20877e-51	0.997358	1	0.92	1.73438e-46
EHD2	9.49692e-51	0.607948	0.773	0.272	1.78865e-46
ADAM9	1.24335e-50	0.729442	0.906	0.451	2.34173e-46
TNC	1.88066e-50	1.36074	0.945	0.514	3.54204e-46
SOX9	2.17479e-50	0.680559	0.641	0.156	4.09599e-46
LOX	5.91517e-50	0.567941	0.516	0.098	1.11406e-45
COL5A2	7.96446e-50	0.873972	0.984	0.636	1.50003e-45
MECOM	8.46806e-49	0.325332	0.391	0.056	1.59487e-44
PRSS23	2.20533e-48	1.0567	0.789	0.324	4.15352e-44
ARPC2	3.5801e-48	0.619477	0.984	0.968	6.74275e-44
ITGA1	4.81701e-48	0.858881	0.867	0.357	9.07236e-44
FILIP1L	7.99661e-47	0.641692	0.578	0.135	1.50608e-42
CDKN1A	9.84144e-47	1.03454	0.742	0.227	1.85354e-42
ZFP36L1	1.70577e-46	0.920713	1	0.948	3.21265e-42
S100A11	3.86251e-46	1.01222	0.984	0.781	7.27465e-42
TPM4	6.56595e-46	0.859877	1	0.947	1.23663e-41
MYH9	1.2981e-45	0.887783	1	0.901	2.44484e-41
FAM114A1	1.57005e-45	0.534233	0.875	0.405	2.95704e-41
ACTN1	1.3863e-44	1.13867	0.984	0.891	2.61096e-40
GDF6	1.47568e-44	0.435757	0.531	0.113	2.77929e-40
DSC3	1.99148e-44	0.659723	0.711	0.222	3.75076e-40
RFTN1	3.37752e-44	0.654542	0.812	0.302	6.36121e-40
HBEGF	4.87898e-44	0.668022	0.5	0.107	9.18906e-40
HEYL	5.43217e-44	0.426152	0.461	0.091	1.0231e-39
TAGLN	5.64592e-44	1.38737	0.969	0.752	1.06335e-39
MAGED2	2.16567e-43	0.742172	1	0.869	4.07882e-39
CSRP1	4.82113e-43	1.22226	0.938	0.622	9.08011e-39
ENC1	1.6362e-42	0.808496	0.805	0.313	3.08161e-38
THBS1	3.19046e-42	1.0778	0.688	0.213	6.00892e-38
MAP1LC3A	1.18328e-41	0.598626	0.812	0.324	2.22859e-37
TGFB1I1	3.58157e-41	0.578784	0.836	0.356	6.74553e-37
CNN1	1.23599e-40	0.882009	0.859	0.419	2.32786e-36
TMSB10	1.5705e-40	0.680483	0.992	0.981	2.95789e-36
ARID5B	2.38614e-40	0.565783	0.664	0.198	4.49405e-36
MMP2	1.0446e-39	0.802641	0.875	0.473	1.96741e-35
ISLR	1.0947e-39	0.272314	0.297	0.04	2.06175e-35
CDC42EP1	5.84928e-39	0.627486	0.82	0.386	1.10165e-34
FBN1	1.04918e-38	0.873516	0.727	0.298	1.97603e-34
LHFP	7.59359e-38	0.569621	0.891	0.4	1.43018e-33
HEY1	1.93392e-37	0.618326	0.68	0.233	3.64235e-33
TIMP1	2.18534e-37	0.674226	0.977	0.858	4.11586e-33
FBLN2	2.04058e-36	0.642046	0.82	0.393	3.84322e-32
CLMN	1.11242e-35	0.395488	0.516	0.138	2.09513e-31
SPP1	3.23542e-35	0.643301	0.422	0.093	6.09358e-31
EMILIN1	1.12682e-34	0.343458	0.492	0.131	2.12226e-30
S100A6	2.61994e-34	0.525179	0.703	0.287	4.93439e-30
NID1	5.97683e-34	0.606723	0.875	0.523	1.12568e-29
PARVA	1.09711e-33	0.569501	0.906	0.604	2.0663e-29
CAPN2	1.41684e-33	0.606068	0.969	0.77	2.66848e-29
LAMB1	1.52814e-33	0.72944	0.93	0.674	2.8781e-29
FSTL1	1.7534e-33	0.674061	0.992	0.951	3.30235e-29
PELO	1.81378e-33	0.766094	0.906	0.6	3.41608e-29
RHOC	2.04746e-33	0.558655	0.945	0.734	3.85619e-29
SSC5D	4.29135e-33	0.270107	0.242	0.032	8.08232e-29
BMP1	6.72137e-33	0.436218	0.703	0.292	1.2659e-28
CREB3L1	6.96258e-33	0.692708	0.836	0.471	1.31133e-28
HSPB1	1.37957e-32	0.690104	1	0.976	2.59827e-28
TANC1	1.6148e-32	0.516054	0.836	0.43	3.04131e-28
EMP3	1.97944e-32	0.499906	0.828	0.449	3.72807e-28
EFNB2	2.4439e-32	0.781982	0.852	0.53	4.60283e-28
EPAS1	2.94898e-32	0.702722	0.336	0.063	5.55411e-28
SH3BGRL3	4.96055e-32	0.593861	0.977	0.85	9.3427e-28
LPP	5.70753e-32	0.714915	0.953	0.845	1.07496e-27
ANXA2	6.06196e-32	0.753615	0.992	0.914	1.14171e-27
GPR126	6.72951e-32	0.587517	0.594	0.21	1.26744e-27
EPS8	7.9825e-32	0.393514	0.664	0.235	1.50342e-27
TNS1	1.22106e-31	0.459143	0.68	0.264	2.29975e-27
CCDC80	1.86724e-31	0.758545	0.859	0.421	3.51677e-27
PHLDB2	2.14178e-31	0.533653	0.797	0.387	4.03383e-27
ANTXR1	2.61607e-31	0.521081	0.844	0.49	4.92711e-27
SEC31A	2.72179e-31	0.509198	0.977	0.866	5.12621e-27
FLNA	2.72534e-31	0.66092	0.984	0.885	5.13291e-27
RNASE1	2.90433e-31	0.296111	0.289	0.049	5.47001e-27
CALU	3.48605e-31	0.540252	0.984	0.921	6.56563e-27
TAGLN2	4.28776e-31	0.58522	0.812	0.416	8.07556e-27
VASH1	8.31622e-31	0.483879	0.742	0.314	1.56628e-26
FAM198B	1.01884e-30	0.309628	0.398	0.09	1.91887e-26
PDLIM7	2.03221e-30	0.610059	0.969	0.81	3.82746e-26
TBX18	2.80677e-30	0.494349	0.805	0.321	5.28628e-26
ARF4	4.62881e-30	0.498932	0.977	0.918	8.7179e-26
PEA15	2.47113e-29	0.606542	0.961	0.757	4.65413e-25
PLK2	2.82798e-29	0.537383	0.609	0.225	5.32622e-25
SLIT3	7.23062e-29	0.695773	0.758	0.357	1.36182e-24
YWHAZ	7.72648e-29	0.451835	1	0.99	1.45521e-24
FNDC3B	8.53138e-29	0.520148	0.914	0.713	1.6068e-24
LAMC1	1.02405e-28	0.550258	1	0.93	1.92869e-24
CHSY1	1.1162e-28	0.535563	0.891	0.581	2.10224e-24
ITGA3	1.117e-28	0.361836	0.578	0.201	2.10376e-24
SNAI2	1.14414e-28	0.634403	0.758	0.369	2.15488e-24
CRIM1	1.5967e-28	0.779066	0.766	0.425	3.00722e-24
RRAS	1.62505e-28	0.425992	0.773	0.402	3.06061e-24
SEMA3D	1.69479e-28	0.418577	0.375	0.089	3.19197e-24
PHLDA1	1.75363e-28	0.695301	0.797	0.443	3.30279e-24
ENPEP	1.9709e-28	0.27462	0.398	0.097	3.71199e-24
ZYX	2.94979e-28	0.678621	0.977	0.901	5.55564e-24
MYRF	3.19062e-28	0.52289	0.969	0.673	6.00922e-24
NCCRP1	3.71462e-28	0.457025	0.656	0.238	6.99611e-24
TGFBI	4.35848e-28	0.945114	0.43	0.119	8.20876e-24
LASP1	4.71831e-28	0.571978	0.945	0.75	8.88646e-24
LUM	4.8911e-28	0.637847	0.336	0.071	9.2119e-24
RAB31	5.31728e-28	0.50938	0.945	0.736	1.00146e-23
PLS3	5.5243e-28	0.70493	0.922	0.743	1.04045e-23
MASP1	5.76027e-28	0.364707	0.695	0.247	1.08489e-23
MYH10	7.65337e-28	0.53535	1	0.956	1.44144e-23
ADAM19	8.08659e-28	0.659572	0.828	0.533	1.52303e-23
PXDC1	8.30074e-28	0.284113	0.523	0.165	1.56336e-23
ID4	1.00773e-27	0.697433	0.789	0.419	1.89796e-23
RAB32	1.45747e-27	0.293458	0.609	0.229	2.74501e-23
SSFA2	2.99674e-27	0.396985	0.711	0.316	5.64406e-23
TLN1	3.55335e-27	0.529257	0.961	0.892	6.69238e-23
IER3	8.6802e-27	0.469462	0.617	0.236	1.63483e-22
AXL	1.22749e-26	0.52108	0.922	0.731	2.31186e-22
FSCN1	1.51362e-26	0.543827	0.984	0.94	2.85076e-22
MYL12B	2.56334e-26	0.573406	0.961	0.894	4.82779e-22
SH3BGRL	2.60742e-26	0.464425	0.961	0.784	4.91081e-22
SULF2	2.69006e-26	0.505081	0.703	0.343	5.06646e-22
SAT1	4.89035e-26	0.523726	0.734	0.375	9.21048e-22
FLNB	5.55604e-26	0.801436	0.867	0.657	1.04643e-21
PDGFB	6.01079e-26	0.285383	0.359	0.087	1.13207e-21
GPR124	8.78666e-26	0.305953	0.492	0.158	1.65488e-21
KCNA5	9.43612e-26	0.500668	0.508	0.168	1.7772e-21
CREB5	9.45651e-26	0.38465	0.578	0.195	1.78104e-21
ITGA5	1.01677e-25	0.445027	0.898	0.553	1.91498e-21
GUCY1A3	1.40579e-25	0.771417	0.891	0.554	2.64767e-21
WSB1	1.46588e-25	0.550865	0.992	0.918	2.76083e-21
LEFTY2	1.59926e-25	0.668318	0.453	0.138	3.01205e-21
MSRB3	2.38437e-25	0.406809	0.883	0.454	4.49071e-21
MAGI2-AS3	2.53804e-25	0.576941	0.867	0.464	4.78015e-21
ACTG1	2.55016e-25	0.626961	1	0.99	4.80297e-21
ITPRIPL2	3.48892e-25	0.313998	0.617	0.258	6.57104e-21
FAM129A	3.83736e-25	0.319365	0.352	0.087	7.22729e-21
DPYSL3	4.5846e-25	0.531408	0.969	0.849	8.63464e-21
BTG3	4.73285e-25	0.443186	0.898	0.565	8.91386e-21
DACT1	5.4783e-25	0.389762	0.508	0.172	1.03178e-20
ACTA1	7.78305e-25	0.618857	0.68	0.27	1.46586e-20
TPM1	1.08523e-24	0.573799	1	0.989	2.04392e-20
BST1	1.10985e-24	0.267867	0.406	0.111	2.09028e-20
TNFRSF21	1.28254e-24	0.623098	0.781	0.517	2.41554e-20
SDC3	1.31273e-24	0.386688	0.758	0.411	2.47239e-20
LOXL1	1.56302e-24	0.543974	0.719	0.39	2.94379e-20
PALLD	1.69396e-24	0.507207	0.969	0.846	3.1904e-20
BMPR2	1.82192e-24	0.465621	0.867	0.55	3.43141e-20
MYL12A	1.83289e-24	0.745403	0.969	0.914	3.45207e-20
KDELR2	1.85716e-24	0.418286	0.953	0.79	3.49777e-20
KDELR3	2.11035e-24	0.425719	0.656	0.316	3.97463e-20
PXDN	2.52864e-24	0.522078	0.953	0.877	4.76244e-20
CAP1	2.8547e-24	0.481718	0.977	0.894	5.37654e-20
JUNB	3.56339e-24	0.384385	0.492	0.166	6.71128e-20
CKAP4	4.72392e-24	0.453265	0.961	0.904	8.89702e-20
FHL1	4.95426e-24	0.672991	0.875	0.61	9.33085e-20
IFITM3	6.44034e-24	0.591706	0.984	0.942	1.21297e-19
NEK6	6.58892e-24	0.289232	0.539	0.204	1.24096e-19
CDC42EP3	7.55279e-24	0.594322	0.914	0.627	1.42249e-19
CTGF	8.23652e-24	1.44287	0.734	0.418	1.55127e-19
ARPC5	9.1298e-24	0.503622	0.953	0.817	1.71951e-19
TCEAL7	1.0656e-23	0.402939	0.633	0.286	2.00696e-19
VCL	1.4175e-23	0.575513	0.961	0.895	2.66971e-19
LIMA1	1.87709e-23	0.491175	0.688	0.344	3.53531e-19
BAALC	1.88969e-23	0.275815	0.477	0.15	3.55904e-19
PTRF	1.95941e-23	0.419847	0.672	0.299	3.69035e-19
ABCA1	2.04147e-23	0.496083	0.75	0.386	3.8449e-19
MAP1B	2.93578e-23	0.497053	0.984	0.954	5.52925e-19
TUBA1A	3.12382e-23	0.658807	0.969	0.879	5.8834e-19
EPSTI1	3.23244e-23	0.293556	0.57	0.216	6.08797e-19
CLIC1	3.55522e-23	0.491453	0.945	0.857	6.69591e-19
RHOBTB1	4.07255e-23	0.317738	0.586	0.238	7.67023e-19
PMEPA1	4.89978e-23	0.483103	0.609	0.247	9.22824e-19
FBXL5	5.39123e-23	0.462414	0.914	0.717	1.01538e-18
CNN3	5.99194e-23	0.463302	0.938	0.727	1.12852e-18
NGFR	7.99562e-23	0.533121	0.43	0.135	1.5059e-18
ERRFI1	8.58478e-23	0.440818	0.594	0.263	1.61686e-18
TFPI	9.69594e-23	0.488767	0.766	0.421	1.82613e-18
KCNMA1	1.35731e-22	0.403745	0.5	0.173	2.55636e-18
MYO1D	1.39816e-22	0.365477	0.672	0.309	2.6333e-18
RBMS3	2.47034e-22	0.393748	0.812	0.434	4.65263e-18
TGM2	2.63359e-22	0.340671	0.539	0.194	4.96011e-18
BAMBI	2.64099e-22	0.575245	0.938	0.701	4.97404e-18
S100A10	2.65728e-22	0.461745	0.977	0.735	5.00473e-18
PPP1R18	2.80923e-22	0.379947	0.836	0.553	5.29091e-18
PACS1	2.89749e-22	0.442378	0.789	0.52	5.45713e-18
COL6A2	3.40907e-22	0.53367	0.93	0.683	6.42065e-18
TGFB1	3.47619e-22	0.339296	0.617	0.269	6.54705e-18
PLXND1	3.72898e-22	0.356383	0.602	0.271	7.02315e-18
IGFBP2	3.84162e-22	0.620416	0.859	0.628	7.2353e-18
COTL1	3.95651e-22	0.514982	0.766	0.472	7.4517e-18
ANKRD1	4.0136e-22	0.574259	0.648	0.258	7.55921e-18
CAV2	6.46234e-22	0.428545	0.773	0.424	1.21712e-17
HNMT	6.47494e-22	0.327843	0.484	0.181	1.21949e-17
FAM127A	7.64756e-22	0.375539	0.984	0.857	1.44034e-17
ACTR3	9.75183e-22	0.443729	0.945	0.842	1.83666e-17
SGK1	1.40458e-21	0.263964	0.336	0.087	2.64538e-17
GUCY1B3	1.44712e-21	0.316425	0.562	0.224	2.7255e-17
ANXA4	1.54109e-21	0.298355	0.68	0.332	2.9025e-17
ACTN4	1.8174e-21	0.73227	0.953	0.905	3.42289e-17
LRRN4	1.94526e-21	0.2547	0.547	0.2	3.6637e-17
GYG1	2.07605e-21	0.61196	0.914	0.674	3.91003e-17
FLRT2	2.12278e-21	0.516824	0.867	0.576	3.99804e-17
CMTM3	2.13857e-21	0.398076	0.852	0.573	4.02778e-17
WDR1	2.25625e-21	0.443963	0.945	0.88	4.24942e-17
MXRA8	2.32433e-21	0.503085	0.68	0.361	4.37764e-17
CD81	2.40047e-21	0.379038	0.984	0.961	4.52105e-17
GALNT10	2.45495e-21	0.269894	0.562	0.237	4.62365e-17
CST3	2.48177e-21	0.454577	0.914	0.742	4.67417e-17
PICALM	2.52884e-21	0.516747	0.867	0.647	4.76282e-17
LOXL2	2.66116e-21	0.486726	0.773	0.513	5.01203e-17
CDKN1C	2.8726e-21	0.617849	0.883	0.636	5.41026e-17
MCAM	3.46625e-21	0.303085	0.484	0.173	6.52833e-17
TRPS1	3.48941e-21	0.338242	0.57	0.232	6.57195e-17
HSPB8	3.75166e-21	0.472091	0.75	0.407	7.06587e-17
ECE1	3.96383e-21	0.420723	0.742	0.422	7.46547e-17
ASAP2	4.03137e-21	0.317404	0.695	0.365	7.59269e-17
CSRP2	4.14012e-21	0.601824	0.969	0.866	7.79749e-17
C1orf198	4.27678e-21	0.650576	0.867	0.72	8.05488e-17
EDIL3	4.43027e-21	0.332578	0.297	0.073	8.34396e-17
F2R	4.46587e-21	0.470002	0.672	0.361	8.41102e-17
MAP4K4	4.82741e-21	0.40432	0.984	0.88	9.09194e-17
GNAS	5.64745e-21	0.30901	1	1	1.06364e-16
GLIPR2	5.71449e-21	0.333445	0.719	0.376	1.07627e-16
BCAR1	5.77535e-21	0.375153	0.758	0.447	1.08773e-16
MYL6	6.87036e-21	0.401696	1	0.993	1.29396e-16
MAFF	7.15818e-21	0.267502	0.383	0.114	1.34817e-16
AFAP1	8.57785e-21	0.312695	0.648	0.312	1.61555e-16
LIMS1	9.49933e-21	0.623676	0.844	0.635	1.7891e-16
SEC23A	9.62324e-21	0.400467	0.883	0.632	1.81244e-16
ACTC1	1.04616e-20	0.603708	1	0.881	1.97033e-16
CLIC4	1.68048e-20	0.432853	0.93	0.894	3.16501e-16
COL16A1	1.92432e-20	0.293064	0.367	0.108	3.62427e-16
ATP2B4	2.84943e-20	0.508367	0.93	0.743	5.36661e-16
LMNA	3.0377e-20	0.479647	0.766	0.504	5.72121e-16
RTN4	3.646e-20	0.344931	0.992	0.979	6.86688e-16
TPM2	3.67155e-20	0.52112	0.992	0.914	6.915e-16
PTPRD	4.07872e-20	0.462407	0.945	0.776	7.68186e-16
JUN	4.72272e-20	0.327728	0.625	0.268	8.89478e-16
SDC2	5.44433e-20	0.518594	0.914	0.783	1.02539e-15
LRP10	6.20264e-20	0.332634	0.797	0.481	1.16821e-15
VIM	6.25481e-20	0.491409	1	0.931	1.17803e-15
ILK	6.60314e-20	0.42053	0.945	0.804	1.24364e-15
RHOB	7.2111e-20	0.292065	0.602	0.278	1.35814e-15
ANKRD50	7.40511e-20	0.484049	0.875	0.656	1.39468e-15
WWTR1	8.09284e-20	0.310491	0.695	0.346	1.52421e-15
MYL9	8.1156e-20	0.553324	0.992	0.946	1.52849e-15
OST4	8.42699e-20	0.341384	0.969	0.935	1.58714e-15
SEC24D	8.49214e-20	0.351197	0.711	0.412	1.59941e-15
FSTL3	8.78586e-20	0.274107	0.414	0.138	1.65473e-15
BEX1	8.85591e-20	0.722398	0.945	0.811	1.66792e-15
RAC1	8.86778e-20	0.324994	0.992	0.971	1.67016e-15
MYOF	9.31725e-20	0.420811	0.773	0.417	1.75481e-15
COL18A1	1.46836e-19	0.494302	0.953	0.831	2.76551e-15
MACF1	1.529e-19	0.492587	0.945	0.878	2.87973e-15
DCN	1.86601e-19	0.325279	0.133	0.016	3.51445e-15
GALNT2	2.01469e-19	0.433329	0.836	0.656	3.79447e-15
TTC3	2.03371e-19	0.48728	0.977	0.861	3.83029e-15
NRBP2	2.13108e-19	0.307967	0.703	0.361	4.01367e-15
GLS	2.8334e-19	0.371859	0.852	0.623	5.33643e-15
TNFRSF19	2.86117e-19	0.384255	0.648	0.303	5.38872e-15
LOC100129034	3.24797e-19	0.250215	0.539	0.222	6.11722e-15
CORO1C	3.35086e-19	0.34668	0.828	0.587	6.31101e-15
VCAN	3.42901e-19	0.729971	0.977	0.916	6.4582e-15
SEPT7	3.69383e-19	0.362029	0.977	0.944	6.95696e-15
CDC42	6.00224e-19	0.358286	0.984	0.963	1.13046e-14
JUND	6.09401e-19	0.463125	0.953	0.822	1.14775e-14
PDE10A	1.14465e-18	0.293502	0.602	0.275	2.15584e-14
MLLT11	1.19961e-18	0.433531	0.945	0.847	2.25935e-14
MIR100HG	1.2624e-18	0.287417	0.492	0.182	2.3776e-14
CD63	1.2703e-18	0.360005	1	0.95	2.39249e-14
PTTG1IP	1.34783e-18	0.363008	0.961	0.918	2.5385e-14
SSH1	1.36125e-18	0.319428	0.727	0.423	2.56379e-14
SYNJ2	1.44503e-18	0.314148	0.562	0.245	2.72158e-14
MBNL2	1.4666e-18	0.314204	0.734	0.402	2.76219e-14
HDLBP	1.51158e-18	0.35123	0.984	0.95	2.84691e-14
CYR61	1.77381e-18	0.807654	0.695	0.404	3.3408e-14
SPON1	1.88385e-18	0.44752	0.633	0.307	3.54803e-14
ZEB2	2.10235e-18	0.343979	0.758	0.439	3.95956e-14
HMGA2	2.70829e-18	0.522785	0.961	0.871	5.10079e-14
KLF13	2.88978e-18	0.288489	0.734	0.422	5.44262e-14
FHL3	3.14176e-18	0.279781	0.68	0.358	5.91718e-14
MAP3K1	3.19074e-18	0.385767	0.781	0.475	6.00944e-14
NOTCH2	3.27334e-18	0.402187	0.82	0.586	6.165e-14
DES	3.65026e-18	0.46334	0.508	0.201	6.8749e-14
TNFRSF12A	4.49511e-18	0.545294	0.703	0.41	8.4661e-14
LRRC17	4.97506e-18	0.292978	0.406	0.137	9.37003e-14
STK38L	5.69497e-18	0.467986	0.719	0.427	1.07259e-13
OLFML2A	6.12733e-18	0.577661	0.57	0.296	1.15402e-13
RCSD1	6.26879e-18	0.353396	0.719	0.362	1.18066e-13
PDGFA	7.34272e-18	0.272248	0.508	0.208	1.38293e-13
PAG1	7.49629e-18	0.270801	0.539	0.218	1.41185e-13
RAI14	9.00358e-18	0.600856	0.836	0.67	1.69573e-13
PHLDA3	9.17708e-18	0.278083	0.609	0.285	1.72841e-13
JAG1	1.06888e-17	0.325916	0.891	0.565	2.01313e-13
ANXA5	1.43563e-17	0.412342	0.992	0.934	2.70387e-13
RSU1	1.96233e-17	0.36413	0.898	0.742	3.69585e-13
GNG12	1.99397e-17	0.363763	0.859	0.611	3.75544e-13
FAM65A	2.28028e-17	0.349086	0.766	0.512	4.29469e-13
CREB3L2	2.5859e-17	0.317999	0.781	0.531	4.87029e-13
LRRC32	2.75878e-17	0.322189	0.555	0.248	5.19589e-13
RGL1	2.93633e-17	0.343181	0.57	0.278	5.53028e-13
GPC6	3.47937e-17	0.369454	0.789	0.516	6.55304e-13
TRIM58	3.66569e-17	0.316614	0.469	0.182	6.90396e-13
TMBIM1	3.99552e-17	0.253055	0.672	0.354	7.52516e-13
AHNAK	4.1084e-17	0.485666	0.953	0.762	7.73776e-13
DDAH1	4.6109e-17	0.600382	0.773	0.516	8.68416e-13
LGMN	5.52149e-17	0.414382	0.859	0.704	1.03992e-12
CTNNA1	6.37839e-17	0.300078	0.938	0.906	1.20131e-12
ACTB	7.0327e-17	0.602684	1	0.988	1.32454e-12
PGM3	7.19618e-17	0.320599	0.844	0.63	1.35533e-12
IL11RA	7.86997e-17	0.278222	0.617	0.305	1.48223e-12
VAMP3	7.97288e-17	0.292549	0.867	0.677	1.50161e-12
PCDH7	9.30515e-17	0.479152	0.914	0.752	1.75253e-12
TRIO	9.88425e-17	0.27198	0.68	0.369	1.8616e-12
ACTG2	1.0494e-16	0.920123	0.211	0.047	1.97645e-12
NUAK1	1.04945e-16	0.50542	0.641	0.36	1.97653e-12
FTL	1.25078e-16	0.478161	1	0.984	2.35573e-12
TUBB6	1.25308e-16	0.586412	0.875	0.714	2.36006e-12
COL21A1	1.28234e-16	0.273291	0.312	0.095	2.41515e-12
PLD3	1.38185e-16	0.366685	0.969	0.867	2.60258e-12
CMPK1	1.45408e-16	0.317308	0.805	0.56	2.73862e-12
LOC728392	1.65009e-16	0.368137	0.68	0.375	3.10778e-12
FZD6	1.70087e-16	0.287302	0.609	0.319	3.20342e-12
HEY2	1.95794e-16	0.303517	0.398	0.147	3.68758e-12
LITAF	2.02193e-16	0.397114	0.914	0.702	3.8081e-12
PFDN1	2.06785e-16	0.338702	0.867	0.722	3.89459e-12
TIMP2	2.35168e-16	0.387291	0.727	0.475	4.42916e-12
NRARP	2.41635e-16	0.275833	0.414	0.16	4.55095e-12
CSRNP1	2.61074e-16	0.256479	0.461	0.193	4.91707e-12
PLOD2	2.67508e-16	0.411584	0.867	0.681	5.03824e-12
COL6A1	2.83708e-16	0.455561	0.961	0.927	5.34335e-12
CERCAM	3.01855e-16	0.309329	0.672	0.393	5.68513e-12
CD151	3.21907e-16	0.335894	0.922	0.807	6.0628e-12
FAM129B	3.23175e-16	0.304856	0.758	0.491	6.08667e-12
MYOZ2	3.23285e-16	0.33556	0.75	0.345	6.08874e-12
ACTR2	3.5933e-16	0.317124	0.945	0.873	6.76761e-12
TP53INP2	3.99878e-16	0.410828	0.742	0.429	7.53131e-12
FZD1	4.47945e-16	0.390351	0.648	0.331	8.4366e-12
ATXN1	4.74102e-16	0.252778	0.688	0.332	8.92924e-12
CAV1	6.48906e-16	0.337671	0.492	0.207	1.22215e-11
TMEM43	7.00598e-16	0.306362	0.656	0.379	1.31951e-11
CTSB	7.93954e-16	0.421222	0.883	0.705	1.49533e-11
PPP1R14A	9.33444e-16	0.338781	0.602	0.311	1.75805e-11
EXT1	1.00408e-15	0.319825	0.75	0.465	1.89108e-11
PRKAR1A	1.18184e-15	0.282406	0.992	0.939	2.22587e-11
FAM177A1	1.19974e-15	0.331784	0.742	0.516	2.25959e-11
CGNL1	1.34157e-15	0.483076	0.922	0.743	2.52671e-11
DNAJC15	1.38613e-15	0.428468	0.922	0.767	2.61064e-11
IQGAP1	1.48713e-15	0.379179	0.906	0.737	2.80085e-11
DUSP1	1.87172e-15	0.46146	0.445	0.193	3.52519e-11
ARHGAP23	2.84203e-15	0.303708	0.719	0.42	5.35268e-11
DGKI	2.91687e-15	0.415345	0.594	0.296	5.49363e-11
TMEM2	3.19338e-15	0.374784	0.797	0.556	6.01442e-11
NOG	3.55822e-15	0.313951	0.305	0.096	6.70155e-11
RICTOR	3.67521e-15	0.325913	0.727	0.46	6.92189e-11
TGFBR1	4.09007e-15	0.381521	0.867	0.674	7.70324e-11
SCRN1	4.4817e-15	0.306686	0.93	0.835	8.44083e-11
TSPAN5	5.08381e-15	0.382564	0.609	0.357	9.57485e-11
LGI2	5.56636e-15	0.37617	0.734	0.397	1.04837e-10
SPATS2L	6.18456e-15	0.393159	0.844	0.661	1.1648e-10
MTHFD1L	6.49154e-15	0.306287	0.734	0.477	1.22262e-10
LTBP1	7.59887e-15	0.427234	0.836	0.579	1.43117e-10
UNC5B	7.74937e-15	0.509972	0.875	0.723	1.45952e-10
PTGDS	8.18292e-15	0.289743	0.242	0.066	1.54117e-10
EIF1	1.14533e-14	0.285576	1	0.986	2.15712e-10
MYO1C	1.31015e-14	0.314084	0.828	0.65	2.46754e-10
IGFBP5	1.32342e-14	0.705166	0.727	0.439	2.49253e-10
SORBS2	1.51263e-14	0.402491	0.836	0.51	2.84888e-10
MAP4	1.75853e-14	0.366691	0.93	0.882	3.31202e-10
P4HB	1.79111e-14	0.350628	0.953	0.877	3.37338e-10
NFE2L2	2.07216e-14	0.290971	0.773	0.533	3.9027e-10
HGSNAT	2.13357e-14	0.258477	0.75	0.475	4.01837e-10
AEBP1	2.28889e-14	0.290901	0.781	0.497	4.31089e-10
FAM107B	2.71675e-14	0.298847	0.625	0.351	5.11673e-10
PLEKHG3	3.52052e-14	0.25716	0.695	0.417	6.63055e-10
SAMD4A	3.53845e-14	0.31122	0.648	0.345	6.66433e-10
RND3	4.04392e-14	0.483513	0.602	0.349	7.61632e-10
MALAT1	4.10028e-14	0.52529	1	0.978	7.72246e-10
ARHGEF40	4.22099e-14	0.376182	0.719	0.517	7.94981e-10
RCAN1	4.61879e-14	0.351233	0.539	0.259	8.69904e-10
HOOK3	4.83964e-14	0.313922	0.875	0.738	9.11499e-10
PFKP	5.20226e-14	0.512996	0.883	0.784	9.79793e-10
DNAJC1	5.32024e-14	0.333985	0.695	0.455	1.00201e-09
GNG5	5.67071e-14	0.281863	0.969	0.976	1.06802e-09
CAPNS1	5.7614e-14	0.308943	0.961	0.967	1.0851e-09
UBE2H	6.92147e-14	0.287068	0.945	0.84	1.30359e-09
ARHGAP1	7.16832e-14	0.363595	0.859	0.771	1.35008e-09
CDH2	7.45769e-14	0.351374	0.938	0.769	1.40458e-09
DYNLT1	7.67135e-14	0.356092	0.953	0.884	1.44482e-09
SBDS	7.91592e-14	0.260216	0.695	0.433	1.49088e-09
TRIM8	1.05988e-13	0.306222	0.648	0.399	1.99618e-09
ZNF706	1.06449e-13	0.318815	0.844	0.671	2.00486e-09
STAT6	1.07246e-13	0.315672	0.703	0.444	2.01988e-09
CCNL2	1.2096e-13	0.293826	0.93	0.775	2.27815e-09
DSTN	1.21113e-13	0.289579	0.977	0.931	2.28103e-09
ATP13A3	1.28567e-13	0.444796	0.914	0.762	2.42144e-09
PLAT	1.3203e-13	0.259596	0.5	0.221	2.48666e-09
FAM89B	1.35486e-13	0.32018	0.805	0.602	2.55175e-09
COL4A5	1.37737e-13	0.325282	0.938	0.755	2.59414e-09
EDN1	1.61437e-13	0.506316	0.32	0.109	3.0405e-09
IRF2BP2	2.05417e-13	0.355536	0.812	0.706	3.86883e-09
SORBS3	2.07459e-13	0.302017	0.859	0.703	3.90728e-09
MSN	2.35456e-13	0.307933	0.891	0.762	4.43458e-09
ATF3	2.45608e-13	0.293155	0.391	0.16	4.62579e-09
DYNC1I2	2.54572e-13	0.294363	0.969	0.888	4.79462e-09
SEPT6	2.89105e-13	0.26353	0.562	0.294	5.44501e-09
C5orf24	2.93333e-13	0.317314	0.922	0.787	5.52463e-09
FYTTD1	3.04775e-13	0.259903	0.828	0.587	5.74013e-09
MAP1LC3B	3.13876e-13	0.287723	0.93	0.835	5.91154e-09
EFNB1	3.16892e-13	0.260404	0.562	0.295	5.96835e-09
ARMCX3	3.32936e-13	0.293864	0.82	0.633	6.27052e-09
ZMAT3	4.04381e-13	0.402297	0.766	0.548	7.6161e-09
ZCCHC24	4.5329e-13	0.359404	0.805	0.601	8.53727e-09
SEPT11	5.07614e-13	0.36053	0.961	0.83	9.56039e-09
KCTD10	5.29077e-13	0.313687	0.781	0.632	9.96463e-09
HDAC7	5.29504e-13	0.263391	0.812	0.589	9.97268e-09
OPTN	5.41034e-13	0.300409	0.617	0.403	1.01898e-08
MRC2	5.64255e-13	0.462795	0.695	0.475	1.06272e-08
ADAMTS5	5.75783e-13	0.355815	0.258	0.079	1.08443e-08
ROCK2	6.48821e-13	0.299517	0.773	0.563	1.22199e-08
IGF1R	7.63442e-13	0.391626	0.875	0.739	1.43787e-08
RCN1	8.53402e-13	0.35187	0.891	0.765	1.6073e-08
SMARCA1	9.48243e-13	0.257436	0.93	0.869	1.78592e-08
CCND2	9.53642e-13	0.482677	0.961	0.879	1.79609e-08
CHPF	9.68148e-13	0.289086	0.75	0.497	1.82341e-08
SEMA5A	9.94352e-13	0.417107	0.766	0.531	1.87276e-08
RRBP1	1.05538e-12	0.315712	0.734	0.525	1.9877e-08
GOLGA3	1.12731e-12	0.265429	0.75	0.527	2.12318e-08
PTGFRN	1.22554e-12	0.262615	0.617	0.378	2.30818e-08
SCARB2	1.27165e-12	0.371416	0.891	0.764	2.39503e-08
SHC1	1.3093e-12	0.321122	0.891	0.736	2.46594e-08
FILIP1	1.39486e-12	0.267884	0.766	0.44	2.62708e-08
RGS4	1.43309e-12	0.284923	0.438	0.176	2.69909e-08
IGFBP3	1.4536e-12	0.559379	0.461	0.208	2.7377e-08
C4orf48	1.67595e-12	0.369767	0.836	0.635	3.15649e-08
PDLIM1	1.85887e-12	0.448265	0.945	0.836	3.501e-08
JUP	1.91512e-12	0.313518	0.93	0.863	3.60694e-08
KCTD12	2.38222e-12	0.556324	0.852	0.618	4.48668e-08
MAGED1	2.51382e-12	0.28499	0.984	0.944	4.73453e-08
MXRA7	2.63609e-12	0.271601	0.961	0.838	4.96482e-08
CEP170	2.86925e-12	0.317418	0.906	0.766	5.40395e-08
C12orf23	3.12491e-12	0.266351	0.648	0.406	5.88546e-08
COPA	3.14375e-12	0.269209	0.969	0.899	5.92095e-08
EVI5	3.3008e-12	0.296577	0.641	0.42	6.21673e-08
LAMP2	3.36237e-12	0.269324	0.836	0.695	6.33269e-08
FAT3	3.4825e-12	0.417771	0.555	0.305	6.55893e-08
LIMS2	4.05541e-12	0.257182	0.484	0.228	7.63797e-08
STX3	4.13306e-12	0.276833	0.711	0.479	7.78421e-08
PPFIBP1	5.75737e-12	0.266694	0.719	0.469	1.08434e-07
MPZL1	6.31523e-12	0.289385	0.891	0.731	1.18941e-07
AGRN	6.54e-12	0.306056	0.852	0.65	1.23174e-07
PJA2	7.38781e-12	0.281582	0.969	0.855	1.39142e-07
FLNC	9.07993e-12	0.385866	0.891	0.715	1.71011e-07
SKIL	9.19367e-12	0.329433	0.766	0.576	1.73154e-07
TCF21	9.53914e-12	0.533849	0.281	0.103	1.7966e-07
FERMT2	1.02474e-11	0.30474	0.906	0.81	1.93e-07
PTPRF	1.06211e-11	0.309929	0.898	0.824	2.00038e-07
ARHGDIA	1.13611e-11	0.32326	0.891	0.811	2.13974e-07
LAMA5	1.14977e-11	0.306101	0.891	0.788	2.16548e-07
ATP2C1	1.30265e-11	0.261407	0.812	0.662	2.45341e-07
ZNF83	1.36038e-11	0.319219	0.938	0.734	2.56214e-07
RAB5C	1.36292e-11	0.256058	0.719	0.471	2.56692e-07
ANXA3	1.48144e-11	0.401706	0.641	0.406	2.79015e-07
VASP	1.50018e-11	0.273604	0.742	0.52	2.82545e-07
RHOQ	1.61397e-11	0.255229	0.875	0.724	3.03974e-07
SERPINH1	1.66995e-11	0.27385	0.961	0.897	3.14518e-07
CFL2	1.7936e-11	0.29503	0.891	0.765	3.37807e-07
KLF3	1.98449e-11	0.271441	0.641	0.414	3.73759e-07
KIF5B	2.01153e-11	0.315935	0.953	0.889	3.78852e-07
DSP	2.36359e-11	0.482118	0.953	0.915	4.45158e-07
MEST	2.49753e-11	0.338486	0.766	0.511	4.70386e-07
APP	3.36519e-11	0.336627	0.992	0.915	6.338e-07
ADI1	3.44831e-11	0.327538	0.82	0.667	6.49455e-07
FBLIM1	4.13234e-11	0.321694	0.711	0.521	7.78285e-07
PRDX6	4.85736e-11	0.371927	0.977	0.975	9.14835e-07
ARL4D	5.76414e-11	0.27421	0.672	0.434	1.08562e-06
FLT1	5.90439e-11	0.393889	0.75	0.514	1.11203e-06
RGS5	6.63412e-11	0.53028	0.844	0.648	1.24947e-06
FYN	7.69293e-11	0.287632	0.844	0.664	1.44889e-06
KLHDC8B	8.17145e-11	0.299609	0.656	0.419	1.53901e-06
SIPA1L2	8.28009e-11	0.266535	0.844	0.598	1.55947e-06
GNAI2	9.06786e-11	0.266358	0.961	0.907	1.70784e-06
FKBP10	1.03916e-10	0.308739	0.82	0.597	1.95715e-06
DYNC1LI2	1.0999e-10	0.26416	0.883	0.747	2.07155e-06
C3orf58	1.10902e-10	0.39869	0.75	0.55	2.08873e-06
NFIA	1.14408e-10	0.48052	0.43	0.207	2.15477e-06
ELL2	1.21993e-10	0.255393	0.695	0.48	2.29762e-06
AKAP12	1.28169e-10	0.63645	0.875	0.848	2.41393e-06
PRSS35	1.32909e-10	0.303243	0.539	0.279	2.50321e-06
PTP4A1	1.49978e-10	0.290916	0.898	0.786	2.82469e-06
B2M	1.72441e-10	0.263899	0.938	0.835	3.24776e-06
SPIN4	2.22496e-10	0.399061	0.617	0.402	4.19049e-06
STMN2	2.42745e-10	0.331212	0.102	0.019	4.57186e-06
IKBIP	2.51621e-10	0.256258	0.594	0.372	4.73904e-06
GADD45A	2.71063e-10	0.420671	0.797	0.665	5.1052e-06
IER2	2.93357e-10	0.342249	0.734	0.512	5.52508e-06
DICER1	3.29294e-10	0.2884	0.875	0.738	6.20192e-06
TGFB2	3.44831e-10	0.425184	0.773	0.489	6.49456e-06
CDV3	3.57884e-10	0.271096	0.898	0.815	6.74039e-06
PIP5K1C	4.56988e-10	0.32515	0.789	0.636	8.60691e-06
OSBPL9	5.00215e-10	0.257338	0.914	0.824	9.42105e-06
IL6ST	5.77635e-10	0.28215	0.914	0.736	1.08792e-05
TEAD3	5.86437e-10	0.255353	0.844	0.673	1.1045e-05
ENAH	5.99759e-10	0.310751	0.984	0.963	1.12959e-05
HABP4	6.52981e-10	0.265659	0.727	0.512	1.22982e-05
SPTBN1	6.72522e-10	0.261224	0.969	0.878	1.26663e-05
RBMS1	8.23775e-10	0.263743	0.945	0.82	1.5515e-05
GNG2	8.78126e-10	0.298702	0.422	0.218	1.65386e-05
UBE2J1	9.52323e-10	0.262426	0.734	0.56	1.79361e-05
FAM171A1	1.04143e-09	0.258556	0.844	0.739	1.96143e-05
NAGK	1.1281e-09	0.256162	0.812	0.646	2.12466e-05
PDE3A	1.31766e-09	0.264365	0.641	0.401	2.48169e-05
DSEL	1.32939e-09	0.274399	0.445	0.235	2.50376e-05
EMILIN2	1.48549e-09	0.270309	0.664	0.43	2.79777e-05
MAP4K5	1.48815e-09	0.255136	0.75	0.602	2.80279e-05
EFNA5	1.50353e-09	0.347919	0.812	0.656	2.83175e-05
FAM210B	1.62865e-09	0.267281	0.734	0.56	3.06741e-05
PTN	1.76877e-09	0.604671	0.812	0.6	3.3313e-05
FAM46A	1.96046e-09	0.255208	0.586	0.348	3.69234e-05
LGALS1	2.41706e-09	0.435387	0.477	0.27	4.55228e-05
OSBPL8	2.50799e-09	0.291562	0.852	0.749	4.72355e-05
SOX4	2.53172e-09	0.457484	0.992	0.941	4.76824e-05
CRTAP	2.706e-09	0.279368	0.984	0.928	5.09649e-05
SMC5	2.73395e-09	0.287528	0.75	0.584	5.14913e-05
AFF4	2.99328e-09	0.265917	0.875	0.751	5.63754e-05
EEA1	3.67149e-09	0.271572	0.664	0.483	6.91488e-05
CALB2	4.45187e-09	0.39199	0.43	0.226	8.38466e-05
WWC3	4.66977e-09	0.255285	0.758	0.614	8.79505e-05
MGST3	4.79176e-09	0.258955	0.953	0.854	9.0248e-05
TENM3	4.93487e-09	0.255885	0.836	0.71	9.29434e-05
KRT8	5.65736e-09	0.43628	0.992	0.945	0.000106551
SPECC1	6.28978e-09	0.253803	0.695	0.526	0.000118462
TES	6.56348e-09	0.273523	0.633	0.479	0.000123617
CDK2AP2	7.46717e-09	0.354886	0.773	0.664	0.000140637
CCND1	7.59729e-09	0.251066	0.727	0.451	0.000143087
SSR2	7.92012e-09	0.250707	0.953	0.896	0.000149167
RAP1A	8.13772e-09	0.308668	0.797	0.667	0.000153266
PTEN	8.65506e-09	0.315968	0.75	0.581	0.000163009
TACC1	9.04191e-09	0.272565	0.625	0.43	0.000170295
UBC	9.18372e-09	0.25525	1	0.943	0.000172966
FRMD4B	1.04444e-08	0.256325	0.773	0.526	0.00019671
RPS6KA3	1.29066e-08	0.255567	0.711	0.5	0.000243083
RHEB	1.33528e-08	0.251126	0.922	0.902	0.000251486
MARCKS	1.39248e-08	0.449625	0.977	0.87	0.00026226
CAP2	1.58929e-08	0.272697	0.922	0.787	0.000299327
PRKCDBP	1.71956e-08	0.255654	0.703	0.506	0.000323863
SORBS1	1.88398e-08	0.270912	0.477	0.284	0.000354829
CXXC5	2.23775e-08	0.280968	0.656	0.45	0.000421458
EZR	2.31718e-08	0.345747	0.914	0.869	0.000436417
TUBB3	2.43012e-08	0.266436	0.664	0.446	0.000457688
AKAP13	2.56997e-08	0.269596	0.859	0.729	0.000484028
POSTN	2.96214e-08	0.258177	0.203	0.072	0.00055789
NFIB	2.97538e-08	0.367478	0.68	0.477	0.000560383
MATN2	3.29141e-08	0.252372	0.562	0.332	0.000619904
CBLN2	3.71002e-08	0.768032	0.328	0.169	0.000698745
PPP2CB	3.77536e-08	0.256448	0.93	0.851	0.000711051
CSNK1A1	4.57186e-08	0.267776	0.914	0.875	0.000861064
MYADM	4.72377e-08	0.383726	0.836	0.766	0.000889675
SOD3	5.30362e-08	0.250736	0.562	0.365	0.000998883
NEAT1	5.79325e-08	0.615838	0.586	0.381	0.0010911
NQO1	8.38994e-08	0.312992	0.703	0.506	0.00158016
IRS2	9.49272e-08	0.310655	0.484	0.304	0.00178786
ACSL3	1.2664e-07	0.26996	0.883	0.756	0.00238513
UACA	1.48413e-07	0.332079	0.727	0.586	0.00279521
MFAP4	1.5021e-07	0.999742	0.375	0.218	0.00282906
HEG1	2.25265e-07	0.356164	0.82	0.702	0.00424263
TP53I11	2.28466e-07	0.32554	0.844	0.77	0.00430294
BTG2	2.36001e-07	0.258291	0.523	0.334	0.00444483
TJP1	2.47816e-07	0.264747	0.852	0.763	0.00466737
XPO4	2.62318e-07	0.369498	0.711	0.596	0.0049405
NPPB	2.62428e-07	0.440039	0.398	0.214	0.00494258
HTRA1	4.45527e-07	0.339277	0.633	0.452	0.00839106
ANK3	5.1069e-07	0.290655	0.789	0.68	0.00961834
PTPLA	5.84745e-07	0.262418	0.68	0.528	0.0110131
FAT1	6.83279e-07	0.260693	0.844	0.698	0.0128689
KRT18	9.71313e-07	0.395511	0.914	0.81	0.0182937
SACS	1.64619e-06	0.326616	0.734	0.606	0.0310044
DHRS9	2.82752e-06	0.615935	0.234	0.108	0.0532536
USP53	2.97198e-06	0.317367	0.68	0.548	0.0559742
CAMK2N1	5.682e-06	0.277952	0.367	0.213	0.107015
FAM84B	5.69036e-06	0.341535	0.82	0.704	0.107172
NUAK2	1.10834e-05	0.267476	0.352	0.219	0.208745
FBLN1	1.67143e-05	0.300705	0.883	0.737	0.314798
CADM1	1.84735e-05	0.371346	0.758	0.65	0.34793
NOTCH3	2.72371e-05	0.254364	0.742	0.627	0.512984
TMEM55A	2.79199e-05	0.253535	0.602	0.477	0.525843
UCHL1	4.94404e-05	0.261364	0.945	0.906	0.93116
NCAM1	6.24132e-05	0.412435	0.734	0.591	1
LTBP4	8.76617e-05	0.449933	0.594	0.536	1
SEMA3A	0.000120807	0.318506	0.648	0.532	1
H19	0.000145217	0.434867	0.758	0.591	1
NRP2	0.000174757	0.296842	0.578	0.446	1
NAV1	0.000197721	0.259056	0.75	0.643	1
LDLR	0.0002027	0.37564	0.648	0.62	1
MFAP2	0.000266223	0.332628	0.852	0.751	1
TCAF1	0.000307789	0.434046	0.211	0.117	1
BMF	0.000398807	0.267662	0.586	0.486	1
RNA45S5	0.000413699	0.302953	0.203	0.104	1
MYLK	0.00048381	0.303706	0.242	0.142	1
PCDH18	0.000491561	0.285664	0.477	0.36	1
SARAF	0.000595225	0.25035	0.227	0.129	1
FAM115A	0.00145509	0.259092	0.688	0.671	1
GATM	0.00167412	0.664208	0.352	0.266	1
NORAD	0.00169285	0.353562	0.219	0.135	1
RPS17	0.0023643	0.424538	0.234	0.146	1
AMOTL2	0.00263686	0.324932	0.758	0.713	1
RACK1	0.00454382	0.455409	0.234	0.151	1
RPS27L	0.00758179	0.258088	0.867	0.823	1
RGS2	0.0186694	0.268679	0.352	0.276	1
HAND1	0.245247	0.336549	0.328	0.298	1

## Sheet: D10_2
	p_val	avg_logFC	pct.1	pct.2	p_val_adj
ANKRD1	1.6748e-228	1.75158	0.793	0.166	3.15433e-224		as shown in Figure 4
ACTA2	1.45085e-219	1.90157	0.972	0.447	2.73253e-215
SLC47A1	4.12278e-206	0.789895	0.778	0.182	7.76484e-202
CSRP1	9.8824e-202	1.36473	0.97	0.566	1.86125e-197
TMEM71	5.29085e-198	0.668651	0.564	0.064	9.96479e-194
ACTA1	3.95711e-194	1.97693	0.788	0.183	7.45282e-190
HSPB1	2.17174e-185	1.18086	1	0.972	4.09025e-181
PDLIM3	2.4902e-185	1.32813	0.936	0.39	4.69003e-181
MYOCD	2.12803e-183	0.97956	0.838	0.275	4.00793e-179
LGI2	1.49153e-180	1.1089	0.859	0.318	2.80914e-176
ACTC1	6.55739e-175	1.66206	1	0.862	1.23502e-170
MYOZ2	1.86388e-172	0.947558	0.859	0.259	3.51043e-168
DOK4	1.12784e-166	0.85302	0.955	0.469	2.12417e-162
HCN4	1.97533e-162	0.8092	0.959	0.426	3.72035e-158
VTN	3.87333e-161	0.465333	0.656	0.148	7.29502e-157
ACTN2	8.34456e-161	1.22099	0.91	0.34	1.57161e-156
RFTN1	3.41626e-157	0.661473	0.767	0.231	6.43419e-153
CAMK2D	2.5062e-153	0.933527	0.961	0.678	4.72018e-149
PDLIM5	2.22026e-146	1.0712	0.991	0.86	4.18164e-142
MICAL2	3.62007e-146	0.901789	0.938	0.496	6.81804e-142
IGFBP7	3.54873e-145	0.562891	0.712	0.175	6.68368e-141
TPM1	7.03879e-143	0.805564	1	0.988	1.32569e-138
TGFB2	6.41506e-138	0.791647	0.914	0.415	1.20821e-133
CNN1	9.08305e-138	0.679332	0.835	0.356	1.7107e-133
COL2A1	1.34517e-136	1.12753	0.977	0.645	2.53349e-132
CMYA5	1.34834e-135	0.947122	0.898	0.417	2.53947e-131
DDAH1	1.78539e-135	0.832902	0.87	0.455	3.36261e-131
SYNPO2L	1.98912e-135	1.02309	0.774	0.273	3.74632e-131
ACTN4	2.40817e-134	1.00358	0.979	0.892	4.53556e-130
EDN1	1.80303e-133	0.604971	0.427	0.054	3.39583e-129
CREB5	8.52731e-133	0.488632	0.594	0.131	1.60603e-128
CSRP3	7.39668e-132	1.20355	0.765	0.232	1.39309e-127
SYTL5	2.28723e-131	0.459603	0.581	0.13	4.30777e-127
TRH	2.95879e-131	0.605625	0.752	0.212	5.57259e-127
MYOF	7.65983e-128	0.936859	0.78	0.359	1.44265e-123
NES	2.14765e-127	0.962151	0.966	0.825	4.04488e-123
TAGLN	2.37822e-127	1.33119	0.977	0.716	4.47915e-123
COL4A1	3.6038e-127	0.650271	0.934	0.569	6.7874e-123
BEX1	5.03061e-127	0.811404	0.972	0.784	9.47465e-123
DNAJC15	1.54148e-125	0.869371	0.964	0.734	2.90322e-121
COL3A1	7.88733e-125	0.829328	0.927	0.429	1.4855e-120
DGKI	2.16194e-124	0.700162	0.69	0.229	4.07181e-120
XIRP1	2.92655e-124	0.89523	0.78	0.306	5.51186e-120
ITGB1	5.29269e-123	0.575916	0.994	0.961	9.96825e-119
MASP1	4.55521e-122	0.968348	0.645	0.187	8.57928e-118
MYL6	1.70763e-121	0.546167	1	0.992	3.21614e-117
SLC8A1	1.38346e-117	0.731127	0.904	0.372	2.60561e-113
HEG1	3.73887e-116	0.798975	0.932	0.66	7.04179e-112
DSC3	1.50452e-115	0.566326	0.607	0.166	2.83361e-111
UNC45B	5.1574e-115	0.667751	0.761	0.267	9.71345e-111
TTN	2.0542e-114	1.06723	0.996	0.779	3.86888e-110
SH3GLB1	7.13953e-114	0.740318	0.968	0.81	1.34466e-109
GNG5	2.3478e-113	0.52107	0.992	0.973	4.42185e-109
SAMD4A	3.34039e-113	0.531396	0.735	0.28	6.29129e-109
TNNT2	1.41468e-112	0.855198	0.994	0.623	2.6644e-108
TBX18	1.67974e-112	0.80572	0.735	0.259	3.16363e-108
PALLD	3.97333e-112	0.744052	0.966	0.828	7.48337e-108
COL4A2	4.55486e-112	0.637733	0.974	0.793	8.57863e-108
PCDH7	6.09024e-111	0.692635	0.964	0.716	1.14704e-106
ITGA1	1.67368e-110	0.72038	0.726	0.306	3.15221e-106
NPTN	2.46016e-110	0.598636	0.947	0.813	4.63347e-106
GSTO1	3.50169e-110	0.79301	0.942	0.781	6.59508e-106
CDH2	3.64602e-110	0.637923	0.962	0.737	6.86692e-106
MYOM1	6.26571e-110	0.732269	0.756	0.243	1.18008e-105
MYL7	1.99207e-109	0.73636	0.998	0.727	3.75186e-105
LMO7	5.21811e-109	0.559871	0.737	0.274	9.82779e-105
NEBL	7.96855e-109	0.956212	0.936	0.663	1.5008e-104
RCSD1	1.79462e-108	0.501542	0.761	0.297	3.37999e-104
DUSP6	8.76372e-108	0.539439	0.615	0.179	1.65056e-103
SLC16A12	2.02964e-107	0.493402	0.686	0.259	3.82263e-103
MGST3	4.73581e-107	0.618636	0.972	0.835	8.91942e-103
PFKP	2.06867e-106	0.692832	0.934	0.758	3.89613e-102
MYL9	5.38735e-106	0.706422	0.991	0.939	1.01465e-101
TNNC1	7.89424e-106	0.809171	0.882	0.417	1.4868e-101
ARID5B	1.94662e-105	0.432034	0.562	0.145	3.66627e-101
PTPLA	1.02404e-104	0.687952	0.808	0.477	1.92867e-100
ISL1	1.59373e-104	0.592314	0.754	0.277	3.00163e-100
SLIT2	1.38751e-103	0.498029	0.797	0.296	2.61324e-99
SMPX	1.51133e-103	0.602438	0.741	0.236	2.84645e-99
EPS8	5.25128e-103	0.377819	0.611	0.179	9.89027e-99
GUCY1A2	3.21982e-102	0.466117	0.523	0.126	6.06421e-98
ABLIM1	5.33359e-102	0.622493	0.917	0.66	1.00453e-97
PDK1	8.66985e-102	0.728009	0.938	0.672	1.63288e-97
SNAP25	1.23198e-101	0.383364	0.506	0.124	2.32032e-97
SIPA1L2	3.3288e-101	0.556312	0.895	0.548	6.26946e-97
CFL2	8.12535e-101	0.591335	0.945	0.734	1.53033e-96
ASB2	1.58344e-100	0.390392	0.491	0.109	2.98225e-96
TECRL	1.76519e-100	0.736143	0.992	0.541	3.32456e-96
BZW2	3.06121e-100	0.57719	0.932	0.767	5.76548e-96
PRDX1	4.80483e-100	0.757902	0.994	0.978	9.04941e-96
MSRB3	1.20635e-99	0.470406	0.836	0.396	2.27204e-95
ABRA	3.06184e-99	0.52808	0.359	0.053	5.76667e-95
ALDH3A2	9.81553e-99	0.814813	0.891	0.711	1.84866e-94
MYL4	1.16989e-98	0.912181	0.917	0.559	2.20337e-94
THBS1	3.52702e-98	0.949001	0.555	0.166	6.64278e-94
BAALC	7.35285e-98	0.348799	0.459	0.103	1.38484e-93
TSPAN2	1.38983e-97	0.530023	0.784	0.358	2.61761e-93
GNG12	2.80063e-97	0.521134	0.876	0.568	5.27471e-93
CASZ1	3.52115e-97	0.424406	0.664	0.24	6.63173e-93
PPP1R12B	4.32251e-96	0.590017	0.865	0.42	8.14101e-92
ATP2B4	5.1825e-96	0.633515	0.936	0.712	9.76071e-92
ANXA1	7.11505e-96	0.5794	0.526	0.131	1.34005e-91
CCDC80	7.474e-96	0.505044	0.816	0.361	1.40765e-91
MOXD1	8.26111e-96	0.433617	0.56	0.172	1.5559e-91
MLLT11	1.05407e-95	0.592847	0.961	0.828	1.98523e-91
GLT25D2	2.12584e-95	0.500983	0.665	0.266	4.00381e-91
TRIM55	4.83883e-95	0.567849	0.701	0.291	9.11346e-91
FN1	1.16425e-94	0.53454	0.957	0.676	2.19275e-90
RBFOX2	2.59727e-94	0.553539	0.974	0.901	4.8917e-90
FHL1	9.52633e-94	0.848606	0.835	0.577	1.79419e-89
FILIP1	3.41694e-93	0.490896	0.825	0.377	6.43547e-89
CTGF	7.80038e-93	1.20903	0.742	0.366	1.46912e-88
DNAJC6	2.53422e-92	0.487663	0.789	0.412	4.77295e-88
MYH6	6.73406e-92	0.375703	0.833	0.286	1.26829e-87
ATP2A2	1.69061e-91	0.724323	0.989	0.94	3.1841e-87
PPIC	5.13046e-91	0.455177	0.829	0.438	9.66272e-87
CDC42EP3	1.23946e-90	0.609534	0.889	0.587	2.3344e-86
MALAT1	1.54228e-90	0.846731	1	0.974	2.90473e-86
ADAM19	1.97323e-90	0.602977	0.806	0.491	3.71638e-86
TBX5	2.2858e-90	0.456853	0.893	0.432	4.30508e-86
MYL12A	5.53301e-90	0.619504	0.959	0.908	1.04209e-85
LIMS1	7.05945e-90	0.71107	0.842	0.602	1.32958e-85
HSPB8	8.60976e-90	0.518906	0.739	0.355	1.62156e-85
CTHRC1	1.14833e-89	0.440006	0.536	0.157	2.16276e-85
CALD1	2.10125e-89	0.841539	0.97	0.895	3.95749e-85
GATA4	1.50879e-88	0.564375	0.983	0.715	2.84165e-84
NCCRP1	7.89896e-88	0.513796	0.571	0.19	1.48769e-83
CAP2	2.35568e-87	0.507307	0.945	0.76	4.43668e-83
LTBP1	5.39579e-87	0.513214	0.84	0.538	1.01624e-82
RELN	6.54896e-87	0.586843	0.883	0.488	1.23343e-82
LIMS2	8.77392e-87	0.285162	0.564	0.171	1.65248e-82
CRYAB	2.12494e-86	0.510708	0.795	0.294	4.00211e-82
SORBS2	5.20796e-86	0.787589	0.84	0.458	9.80867e-82
TNFRSF12A	7.45879e-86	0.654803	0.72	0.361	1.40479e-81
PALM2	1.40796e-85	0.382886	0.648	0.253	2.65176e-81
PLOD2	1.79283e-85	0.483032	0.898	0.645	3.37661e-81
SPON1	3.66974e-85	0.446317	0.647	0.253	6.91159e-81
PRICKLE1	1.47323e-84	0.464926	0.795	0.426	2.77468e-80
MYRF	4.91891e-84	0.704626	0.925	0.636	9.26428e-80
FZD1	5.10619e-84	0.466458	0.669	0.277	9.617e-80
POPDC2	5.23192e-84	0.398823	0.758	0.273	9.8538e-80
ADAM9	1.34429e-83	0.444085	0.761	0.409	2.53183e-79
PRKAR1A	1.58609e-83	0.448432	0.974	0.934	2.98725e-79
AKAP12	1.97481e-83	0.843482	0.959	0.827	3.71935e-79
PELO	3.56312e-83	0.667193	0.829	0.567	6.71078e-79
NPPB	4.64653e-83	1.28838	0.53	0.158	8.75128e-79
MEF2C	1.74912e-82	0.517136	0.765	0.38	3.2943e-78
RGS5	2.31784e-82	0.658383	0.889	0.608	4.36541e-78
PEA15	2.93813e-82	0.529717	0.921	0.734	5.53367e-78
HAND2	5.31144e-82	0.532346	0.912	0.509	1.00036e-77
TGFB1I1	7.22618e-82	0.410176	0.705	0.308	1.36098e-77
CCDC50	1.06988e-80	0.538757	0.893	0.687	2.01501e-76
FRMD4B	1.076e-80	0.464617	0.853	0.471	2.02653e-76
GADD45A	1.97133e-80	0.651978	0.874	0.628	3.71281e-76
RBMS3	3.62773e-80	0.409524	0.788	0.38	6.83247e-76
HMGCS1	6.22151e-80	0.736494	0.902	0.766	1.17176e-75
GMPR	2.21275e-79	0.340383	0.515	0.163	4.1675e-75
PKP2	2.37929e-79	0.537585	0.915	0.647	4.48116e-75
PRKAG2	7.14295e-79	0.342489	0.697	0.301	1.3453e-74
REEP1	1.33367e-78	0.306881	0.556	0.174	2.51183e-74
GABRB2	4.28389e-78	0.346535	0.508	0.152	8.06829e-74
DKK1	8.01086e-78	0.596518	0.571	0.187	1.50877e-73
SLC1A3	8.03674e-78	0.530737	0.803	0.482	1.51364e-73
LRRN4	1.23579e-77	0.322787	0.502	0.155	2.32749e-73
S100A10	5.15417e-77	0.861104	0.927	0.708	9.70736e-73
VCAN	1.06368e-76	0.633691	0.968	0.909	2.00334e-72
THSD7A	1.09521e-75	0.405601	0.669	0.265	2.06271e-71
MXRA7	1.14406e-75	0.420405	0.962	0.818	2.15473e-71
RGS4	1.32706e-75	0.541001	0.466	0.13	2.49939e-71
ADAMTS1	2.42188e-75	0.460572	0.654	0.293	4.56136e-71
HS2ST1	3.43544e-75	0.481442	0.88	0.658	6.47032e-71
MYO18B	3.64889e-75	0.26168	0.579	0.179	6.87232e-71
CYR61	7.8888e-75	0.768012	0.701	0.357	1.48578e-70
CRIP2	5.63185e-74	0.358586	0.872	0.415	1.0607e-69
SYNM	1.15633e-73	0.328382	0.481	0.144	2.17784e-69
BVES	1.92804e-73	0.34123	0.673	0.294	3.63128e-69
MRAS	3.47266e-73	0.383658	0.741	0.391	6.5404e-69
SH3GL3	3.95412e-73	0.360796	0.637	0.288	7.4472e-69
ZAK	5.65126e-73	0.488695	0.889	0.667	1.06436e-68
FBLN2	6.04758e-73	0.454001	0.697	0.352	1.139e-68
TNNI1	8.45777e-73	0.519225	0.994	0.621	1.59294e-68
GDF6	1.13349e-72	0.26076	0.367	0.082	2.13482e-68
CELF2	2.39526e-72	0.452289	0.914	0.71	4.51124e-68
ENC1	4.11719e-72	0.498532	0.63	0.271	7.75431e-68
MYH9	4.62235e-72	0.622536	0.961	0.893	8.70574e-68
GYG1	5.54648e-72	0.543224	0.865	0.646	1.04462e-67
COL6A1	5.58566e-72	0.519011	0.976	0.919	1.052e-67
SDC2	1.02104e-71	0.572022	0.908	0.763	1.92302e-67
FAT1	1.09604e-71	0.516115	0.885	0.667	2.06428e-67
PTPRD	1.20576e-71	0.471921	0.917	0.756	2.27092e-67
KCNJ8	2.41533e-71	0.273382	0.447	0.129	4.54904e-67
RASL11B	4.60476e-71	0.63841	0.726	0.429	8.67261e-67
MYH7	5.31111e-71	0.43332	0.442	0.117	1.00029e-66
DSTN	6.70586e-71	0.416122	0.962	0.927	1.26298e-66
RBM24	1.91988e-70	0.525674	0.842	0.565	3.61589e-66
SVIL	2.73455e-70	0.498512	0.852	0.598	5.15026e-66
LIMCH1	2.81986e-70	0.405907	0.662	0.282	5.31092e-66
BAMBI	2.91692e-70	0.525578	0.915	0.668	5.49373e-66
GNAS	3.72461e-70	0.266067	1	1	7.01494e-66
GPR126	4.18706e-70	0.291741	0.504	0.168	7.88591e-66
PCGF5	1.50562e-69	0.393674	0.645	0.298	2.83569e-65
ACTN1	1.91274e-69	0.700551	0.955	0.882	3.60246e-65
MYL12B	1.29651e-68	0.461755	0.959	0.884	2.44185e-64
MAGI2-AS3	2.50112e-68	0.331234	0.816	0.411	4.71062e-64
SLC20A2	2.85394e-68	0.401583	0.69	0.358	5.37512e-64
LPP	1.17196e-67	0.479319	0.94	0.83	2.20727e-63
ITGAV	1.03382e-66	0.416683	0.867	0.643	1.94709e-62
DYNLT1	1.37761e-65	0.410216	0.949	0.874	2.59458e-61
RIN2	2.13942e-65	0.383296	0.628	0.279	4.02938e-61
COL1A1	2.48777e-65	0.606095	0.989	0.862	4.68547e-61
ZFP36L1	3.29159e-65	0.454722	0.981	0.943	6.19937e-61
ATP5J	3.9557e-65	0.395957	0.981	0.971	7.45016e-61
CALU	6.4218e-65	0.365839	0.964	0.916	1.20948e-60
GATM	7.20668e-65	0.406583	0.56	0.209	1.35731e-60
ARF4	1.36943e-64	0.38255	0.959	0.912	2.57919e-60
CRIM1	4.67449e-64	0.454429	0.694	0.386	8.80393e-60
LMOD1	4.75274e-64	0.288265	0.511	0.185	8.9513e-60
CST3	7.25607e-64	0.402278	0.9	0.718	1.36661e-59
TMEM47	8.0562e-64	0.553007	0.805	0.555	1.5173e-59
MAP1B	1.35114e-63	0.388413	0.981	0.95	2.54474e-59
ASAH1	4.76859e-63	0.483184	0.878	0.659	8.98115e-59
TLN2	1.07613e-62	0.36873	0.769	0.49	2.02679e-58
RHOBTB3	1.36202e-62	0.54793	0.987	0.858	2.56523e-58
ANXA3	1.72234e-62	0.363425	0.705	0.356	3.24385e-58
CYP51A1	2.37396e-62	0.447606	0.897	0.764	4.47111e-58
SPINT2	2.39309e-62	0.431249	0.974	0.927	4.50715e-58
SH3BGRL	3.85645e-62	0.412281	0.908	0.767	7.26324e-58
FLNC	3.91965e-62	0.473879	0.923	0.681	7.38227e-58
SEPT7	4.16507e-62	0.39315	0.981	0.938	7.84449e-58
SOX9	4.74067e-62	0.311338	0.417	0.126	8.92858e-58
POPDC3	5.72687e-62	0.277356	0.662	0.299	1.0786e-57
LDB3	8.19906e-62	0.549561	0.686	0.3	1.54421e-57
SPARC	1.26339e-61	0.528852	0.992	0.948	2.37947e-57
CLIC4	1.5564e-61	0.389276	0.959	0.883	2.93133e-57
FABP3	2.22451e-61	0.284772	0.664	0.288	4.18964e-57
HIPK2	2.49894e-61	0.429619	0.921	0.79	4.7065e-57
ARHGAP42	2.65091e-61	0.385341	0.746	0.447	4.99272e-57
XPR1	2.73557e-61	0.619277	0.842	0.656	5.15218e-57
MSMO1	5.71041e-61	0.534079	0.932	0.846	1.0755e-56
CORO6	1.00103e-60	0.310675	0.611	0.245	1.88534e-56
ATXN1	1.34863e-60	0.274259	0.656	0.283	2.54e-56
C12orf23	1.51804e-60	0.339739	0.664	0.365	2.85909e-56
ADAMTS9	1.81094e-60	0.333772	0.594	0.269	3.41073e-56
FAM127A	2.55774e-60	0.342977	0.942	0.846	4.81725e-56
LAMB1	2.97163e-60	0.443325	0.882	0.643	5.59678e-56
TNFRSF19	3.52245e-60	0.305517	0.59	0.26	6.63418e-56
EPS15	3.95497e-60	0.384315	0.861	0.678	7.44878e-56
MYBPC3	8.12951e-60	0.311532	0.652	0.236	1.53111e-55
NEXN	4.38595e-59	0.421407	0.855	0.566	8.2605e-55
QKI	5.45864e-59	0.38363	0.985	0.948	1.02808e-54
IDI1	5.91057e-59	0.55416	0.885	0.752	1.1132e-54
TNFRSF21	6.28637e-59	0.515188	0.727	0.487	1.18398e-54
LOC401321	2.0465e-58	0.407285	0.707	0.42	3.85437e-54
FERMT1	2.17119e-58	0.262411	0.551	0.226	4.08922e-54
TENM3	3.88058e-58	0.420257	0.87	0.683	7.30868e-54
TP53INP2	1.79394e-57	0.344022	0.697	0.389	3.3787e-53
FLNB	2.07135e-57	0.694962	0.81	0.636	3.90118e-53
SMYD1	6.53593e-57	0.482474	0.746	0.416	1.23098e-52
C1orf198	1.1538e-56	0.460616	0.846	0.702	2.17307e-52
HABP4	1.18262e-56	0.37047	0.733	0.476	2.22735e-52
VASH1	1.28439e-56	0.325174	0.594	0.278	2.41903e-52
MEF2A	1.35152e-56	0.356129	0.876	0.645	2.54545e-52
LRRC17	1.72209e-56	0.34423	0.363	0.103	3.24338e-52
SYNJ2	5.32782e-56	0.283234	0.506	0.207	1.00344e-51
DIXDC1	5.80419e-56	0.432965	0.759	0.516	1.09316e-51
COL1A2	1.07597e-55	0.449637	0.968	0.798	2.02649e-51
PDLIM7	1.30974e-55	0.443426	0.921	0.795	2.46677e-51
NID1	1.60445e-55	0.344436	0.761	0.491	3.02181e-51
MYL3	2.3587e-55	0.601445	0.545	0.221	4.44238e-51
FNBP1	2.52886e-55	0.371742	0.776	0.553	4.76286e-51
CKB	2.67329e-55	0.615133	0.936	0.785	5.03487e-51
SPTBN1	1.25242e-54	0.34516	0.959	0.865	2.35881e-50
COL4A5	1.5832e-54	0.332722	0.925	0.729	2.9818e-50
NRP1	2.54227e-54	0.37066	0.778	0.473	4.78811e-50
MYLK3	3.62589e-54	0.435862	0.727	0.413	6.829e-50
MAP2K1	4.46635e-54	0.656178	0.825	0.693	8.41192e-50
PDE10A	6.12012e-54	0.268445	0.541	0.236	1.15266e-49
CCDC141	1.0751e-53	0.399434	0.763	0.456	2.02485e-49
LGMN	1.3565e-53	0.360203	0.836	0.684	2.55483e-49
ASAP1	1.36266e-53	0.347143	0.838	0.626	2.56643e-49
ZNF608	5.05921e-53	0.362641	0.795	0.54	9.52852e-49
MATN2	9.24387e-53	0.26331	0.602	0.288	1.74099e-48
CGNL1	2.18836e-52	0.416468	0.883	0.723	4.12156e-48
RAI14	3.62554e-52	0.408507	0.846	0.642	6.82835e-48
CCDC3	4.39268e-52	0.323504	0.455	0.169	8.27318e-48
PHF20L1	5.40686e-52	0.37233	0.852	0.67	1.01833e-47
CDK6	1.18813e-51	0.558041	0.874	0.689	2.23772e-47
ZNF704	1.36101e-51	0.324855	0.699	0.396	2.56332e-47
IL6ST	2.01385e-51	0.399034	0.938	0.703	3.79288e-47
TSPAN13	2.1858e-51	0.511623	0.744	0.532	4.11674e-47
PARVA	2.97337e-51	0.333899	0.814	0.575	5.60005e-47
SCD	3.82227e-51	0.418478	0.981	0.937	7.19885e-47
KIAA1324L	4.54747e-51	0.390217	0.805	0.583	8.56471e-47
RBM20	6.17519e-51	0.316059	0.652	0.362	1.16303e-46
DSP	1.40972e-50	0.616947	0.972	0.905	2.65507e-46
TRABD2B	1.41776e-50	0.294288	0.639	0.329	2.67021e-46
ATP2B1	1.69127e-50	0.408009	0.882	0.687	3.18534e-46
DENND5B	3.00998e-50	0.337709	0.805	0.542	5.66899e-46
PLN	5.31651e-50	0.330178	0.878	0.485	1.00131e-45
GLRX	6.75375e-50	0.427302	0.782	0.556	1.272e-45
AXL	9.57034e-50	0.414571	0.867	0.712	1.80248e-45
TPM4	1.49875e-49	0.500443	0.987	0.942	2.82275e-45
SORT1	1.6737e-49	0.343109	0.82	0.629	3.15225e-45
RAB31	1.98164e-49	0.377305	0.904	0.712	3.73223e-45
KIFAP3	1.16203e-48	0.304443	0.722	0.423	2.18856e-44
SLC25A3	1.42138e-48	0.25998	1	0.994	2.67703e-44
USP28	1.91441e-48	0.369669	0.808	0.667	3.6056e-44
SPEG	2.16715e-48	0.270983	0.769	0.456	4.08162e-44
C7orf60	7.25505e-48	0.267308	0.489	0.217	1.36642e-43
FZD7	8.74136e-48	0.489951	0.852	0.729	1.64635e-43
LOC646762	1.17119e-47	0.374114	0.793	0.504	2.20583e-43
WEE1	1.40547e-47	0.435543	0.908	0.802	2.64707e-43
GLS	2.16639e-47	0.315074	0.808	0.595	4.08018e-43
TMEM98	3.28898e-47	0.356335	0.897	0.763	6.19446e-43
MAP4	4.20087e-47	0.362793	0.929	0.875	7.91192e-43
ZFHX3	4.77533e-47	0.295505	0.739	0.433	8.99386e-43
KIF13A	5.45553e-47	0.326419	0.848	0.644	1.02749e-42
GPC3	6.1301e-47	0.371883	0.697	0.419	1.15454e-42
DES	1.10665e-46	0.274178	0.447	0.166	2.08427e-42
EDNRA	1.19488e-46	0.368226	0.789	0.485	2.25043e-42
LAMC1	1.61295e-46	0.442884	0.977	0.923	3.03784e-42
DCBLD2	1.7261e-46	0.344425	0.914	0.826	3.25094e-42
MAP1LC3A	1.96826e-46	0.252155	0.594	0.293	3.70703e-42
SPATS2L	2.49232e-46	0.368148	0.814	0.638	4.69404e-42
C20orf166-AS1	2.88407e-46	0.250075	0.602	0.275	5.43186e-42
FAM65A	3.21745e-46	0.284426	0.742	0.477	6.05975e-42
CAV2	5.09177e-46	0.385281	0.688	0.387	9.58984e-42
NREP	5.67373e-46	0.26144	0.977	0.961	1.06859e-41
RHOQ	7.17536e-46	0.336217	0.87	0.702	1.35141e-41
HBEGF	2.02296e-45	0.26197	0.305	0.085	3.81004e-41
MACF1	2.52317e-45	0.342654	0.932	0.87	4.75214e-41
VCL	2.78483e-45	0.364468	0.945	0.888	5.24495e-41
DKK3	3.49447e-45	0.304431	0.791	0.543	6.58148e-41
RGS3	3.7216e-45	0.280115	0.667	0.377	7.00927e-41
TANC1	7.6211e-45	0.32177	0.669	0.401	1.43536e-40
ETV1	1.7797e-44	0.315288	0.711	0.383	3.35189e-40
RHOC	3.77456e-44	0.307029	0.883	0.714	7.10901e-40
TMEM133	5.41473e-44	0.31011	0.694	0.436	1.01981e-39
BMP2	6.04378e-44	0.476944	0.795	0.561	1.13829e-39
RYR2	6.92063e-44	0.324166	0.82	0.49	1.30343e-39
SERPINE1	7.84135e-44	0.276419	0.252	0.06	1.47684e-39
FSCN1	1.21067e-43	0.309656	0.983	0.933	2.28019e-39
TRDN	1.3316e-43	0.310771	0.675	0.337	2.50794e-39
TMEM2	3.97578e-43	0.3355	0.75	0.528	7.48798e-39
SQLE	7.9721e-43	0.370297	0.825	0.648	1.50146e-38
RPS6KA2	1.73895e-42	0.28348	0.652	0.365	3.27514e-38
AMOTL2	3.79677e-42	0.405119	0.868	0.683	7.15083e-38
FBN2	6.36684e-42	0.405562	0.9	0.751	1.19913e-37
LRRTM1	7.56667e-42	0.439339	0.656	0.399	1.42511e-37
KDM6A	7.82603e-42	0.378231	0.771	0.569	1.47395e-37
HSD17B12	1.65154e-41	0.312314	0.932	0.861	3.1105e-37
ARHGAP1	2.16148e-41	0.31908	0.867	0.755	4.07092e-37
FREM2	2.33611e-41	0.612376	0.699	0.461	4.39982e-37
RAB12	3.31912e-41	0.396024	0.914	0.805	6.25123e-37
RAB3IP	3.92575e-41	0.395234	0.797	0.63	7.39376e-37
SH3BGR	6.01763e-41	0.258079	0.357	0.13	1.13336e-36
LHFP	9.39157e-41	0.256904	0.673	0.368	1.76881e-36
MITF	1.60435e-40	0.267689	0.613	0.294	3.02163e-36
TLN1	2.27388e-40	0.322889	0.957	0.883	4.28262e-36
KLF6	2.43553e-40	0.413571	0.742	0.526	4.58708e-36
PLS3	2.65285e-40	0.415203	0.857	0.728	4.99637e-36
SLC25A4	3.87173e-40	0.460097	0.859	0.717	7.29202e-36
LOC728392	4.59016e-40	0.329781	0.598	0.344	8.6451e-36
ATP5G3	6.22007e-40	0.346522	0.979	0.983	1.17149e-35
ATP1B1	1.01985e-39	0.396817	0.808	0.63	1.92079e-35
ANXA2	1.47238e-39	0.405324	0.974	0.905	2.77307e-35
CLSTN2	2.36401e-39	0.250389	0.457	0.205	4.45237e-35
OSBPL9	3.76515e-39	0.318435	0.895	0.813	7.09129e-35
WLS	4.95764e-39	0.326667	0.959	0.734	9.33722e-35
COL18A1	7.05777e-39	0.286155	0.921	0.818	1.32926e-34
ADPRHL1	7.71903e-39	0.337385	0.515	0.224	1.4538e-34
CDKN1C	9.58892e-39	0.366619	0.816	0.611	1.80598e-34
LDLR	9.68217e-39	0.396145	0.769	0.591	1.82354e-34
KCNQ1OT1	2.86091e-38	0.359114	0.992	0.978	5.38824e-34
KCTD10	5.46346e-38	0.307307	0.769	0.611	1.02899e-33
MPC1	6.72039e-38	0.259523	0.682	0.423	1.26572e-33
FLT1	8.35256e-38	0.323305	0.739	0.48	1.57312e-33
FLRT2	1.41045e-37	0.361872	0.799	0.544	2.65643e-33
PPP2R3A	1.57291e-37	0.288434	0.825	0.664	2.96241e-33
FAM200B	1.7003e-37	0.274968	0.754	0.548	3.20235e-33
NRP2	3.4256e-37	0.407381	0.635	0.413	6.45178e-33
PICALM	3.82408e-37	0.347824	0.778	0.631	7.20228e-33
PTRF	3.87374e-37	0.25081	0.524	0.271	7.2958e-33
TIPARP	3.94587e-37	0.297509	0.726	0.477	7.43165e-33
IDH2	4.61835e-37	0.274487	0.872	0.742	8.69821e-33
USMG5	7.47906e-37	0.256193	0.953	0.921	1.40861e-32
C5orf24	2.05629e-36	0.282446	0.885	0.773	3.87281e-32
FNDC3B	9.25211e-36	0.272861	0.84	0.697	1.74254e-31
CPEB4	1.68242e-35	0.282602	0.756	0.52	3.16868e-31
ATP1B2	1.90038e-35	0.253122	0.87	0.655	3.57917e-31
UGP2	3.45475e-35	0.282894	0.962	0.906	6.50668e-31
ANGPT1	1.23086e-34	0.327938	0.336	0.126	2.3182e-30
NGFRAP1	1.68098e-34	0.273811	0.917	0.824	3.16596e-30
APLP2	2.54233e-34	0.27675	0.994	0.982	4.78823e-30
SLC25A23	4.77911e-34	0.2958	0.805	0.665	9.00098e-30
GBE1	4.85817e-34	0.253148	0.586	0.353	9.14988e-30
VWDE	6.22795e-34	0.377636	0.799	0.628	1.17297e-29
FRAS1	8.0782e-34	0.296382	0.75	0.551	1.52145e-29
PHLDB2	9.65656e-34	0.260352	0.596	0.364	1.81872e-29
ATP13A3	1.28621e-33	0.344446	0.855	0.751	2.42245e-29
UBE2H	1.46488e-33	0.271787	0.923	0.828	2.75895e-29
CKAP4	1.49977e-33	0.257751	0.945	0.898	2.82466e-29
EPB41L3	1.54964e-33	0.25341	0.85	0.663	2.91859e-29
ALPK3	1.70941e-33	0.26895	0.786	0.577	3.2195e-29
COX7B	1.79615e-33	0.276578	0.979	0.944	3.38287e-29
NUAK1	1.87098e-33	0.351267	0.553	0.334	3.52381e-29
ATAD1	3.10732e-33	0.253931	0.744	0.575	5.85233e-29
VPS13A	3.32481e-33	0.267124	0.786	0.592	6.26195e-29
SPTAN1	5.01457e-33	0.294401	0.938	0.877	9.44444e-29
KIF1B	7.06848e-33	0.261583	0.893	0.818	1.33128e-28
ACSL3	9.34122e-33	0.29429	0.852	0.742	1.75933e-28
ATP2C1	1.29015e-32	0.274646	0.793	0.642	2.42987e-28
C3orf58	1.6132e-32	0.372818	0.709	0.527	3.03829e-28
COL5A2	2.18363e-32	0.266518	0.844	0.61	4.11265e-28
SPP1	4.08354e-32	0.333434	0.246	0.077	7.69094e-28
UNC5B	4.84509e-32	0.290589	0.874	0.699	9.12524e-28
JAG1	1.57987e-31	0.274795	0.776	0.537	2.97553e-27
ARHGAP5	3.13524e-31	0.27518	0.91	0.821	5.90492e-27
TMEM185A	3.80208e-31	0.255043	0.82	0.625	7.16084e-27
KIF5B	6.42167e-31	0.264157	0.951	0.879	1.20946e-26
B3GNT2	1.34489e-30	0.284414	0.575	0.373	2.53297e-26
TMEM87A	2.70734e-30	0.290608	0.797	0.669	5.09901e-26
INSIG1	9.01298e-30	0.275282	0.645	0.435	1.6975e-25
WDR1	6.56027e-29	0.2844	0.93	0.872	1.23556e-24
EMILIN2	1.38735e-28	0.271268	0.622	0.402	2.61293e-24
EXTL3	2.15273e-28	0.278258	0.758	0.624	4.05446e-24
TPM2	3.63475e-28	0.268811	0.945	0.911	6.84569e-24
PPP1R12A	4.86577e-28	0.255978	0.898	0.836	9.16418e-24
ZNF83	9.10284e-28	0.270806	0.857	0.719	1.71443e-23
IGF1R	1.00869e-27	0.278404	0.842	0.725	1.89977e-23
GUCY1A3	1.40237e-27	0.281018	0.818	0.516	2.64121e-23
FLNA	2.3019e-27	0.333421	0.927	0.882	4.33541e-23
DLAT	3.20321e-27	0.320018	0.789	0.683	6.03292e-23
RPS6KA3	3.95195e-27	0.266841	0.652	0.479	7.4431e-23
UGDH-AS1	1.17881e-26	0.305698	0.908	0.813	2.22016e-22
NOVA1	2.44151e-26	0.297162	0.776	0.638	4.59834e-22
AKAP13	2.60726e-26	0.270004	0.825	0.716	4.91051e-22
USP53	1.42488e-25	0.265234	0.705	0.522	2.68362e-21
EZR	2.27865e-25	0.252856	0.93	0.858	4.29161e-21
HES1	2.99835e-25	0.407355	0.59	0.394	5.64709e-21
CYCS	3.53257e-25	0.274647	0.949	0.939	6.65325e-21
DUSP1	1.23755e-24	0.279558	0.353	0.172	2.3308e-20
PKIA	1.81282e-24	0.255248	0.65	0.456	3.41426e-20
TMSB4X	2.49689e-24	0.425226	0.974	0.913	4.70265e-20
ADI1	4.91753e-24	0.262231	0.771	0.653	9.26168e-20
LOC100506990	5.88484e-24	0.263881	0.806	0.687	1.10835e-19
IVNS1ABP	1.42905e-23	0.334152	0.848	0.792	2.69146e-19
PLXNA2	1.45469e-23	0.305127	0.709	0.468	2.73977e-19
LPIN1	2.92903e-23	0.257358	0.701	0.546	5.51654e-19
CXCL14	3.21364e-23	0.285088	0.194	0.064	6.05257e-19
RHEB	1.81054e-22	0.252072	0.925	0.898	3.40996e-18
TNC	1.96536e-21	0.346242	0.737	0.49	3.70156e-17
ACTB	5.22841e-21	0.349325	0.998	0.986	9.8472e-17
JUND	8.21919e-20	0.252023	0.88	0.817	1.548e-15
MYH10	5.38508e-19	0.281631	0.983	0.952	1.01423e-14
RAB8B	1.30586e-18	0.27722	0.598	0.466	2.45945e-14
PLA2G12A	5.79653e-18	0.367756	0.737	0.624	1.09172e-13
TMEM66	2.24886e-17	0.25802	0.831	0.707	4.2355e-13
FAM84B	3.37866e-17	0.26432	0.81	0.688	6.36337e-13
XIST	4.2619e-17	0.25708	0.748	0.661	8.02686e-13
CXCL12	1.50481e-16	0.27779	0.423	0.249	2.83416e-12
IGFBP5	2.72965e-11	0.311397	0.583	0.423	5.14103e-07

## Sheet: cluster D19_1
	p_val	avg_logFC	pct.1	pct.2	p_val_adj
KLHL41	1.80957e-280	1.17261	0.85	0.123	3.40814e-276		as shown in Figure 4
SPHKAP	2.0928e-267	1.22043	0.841	0.127	3.94158e-263
FITM1	8.6111e-255	1.04641	0.831	0.136	1.62182e-250
SHD	1.55492e-231	1.10268	0.813	0.163	2.92854e-227
SHOX2	6.32327e-231	1.32049	0.734	0.116	1.19092e-226
HSPB3	5.76361e-227	0.859853	0.746	0.106	1.08552e-222
POPDC2	2.70643e-224	1.51836	0.931	0.263	5.0973e-220
MYH6	3.26254e-221	1.74465	0.972	0.284	6.14467e-217
TCEA3	2.27775e-216	0.753628	0.709	0.102	4.28991e-212
CAPN3	4.22347e-211	1.11925	0.688	0.102	7.95448e-207
MYBPC3	5.03011e-207	1.18486	0.896	0.212	9.4737e-203
KCNIP2	5.38053e-207	1.19565	0.755	0.14	1.01337e-202
RRAD	4.37662e-203	0.939686	0.716	0.109	8.24293e-199
SMPX	2.87203e-201	1.09778	0.915	0.227	5.40918e-197
HSPB7	2.89893e-200	1.21022	0.94	0.266	5.45984e-196
MYH11	4.39871e-193	1.99477	0.82	0.214	8.28453e-189
CADPS2	1.16719e-192	0.896486	0.767	0.187	2.19828e-188
CKM	1.39026e-190	1.29879	0.824	0.189	2.61841e-186
MYOM1	4.18306e-186	1.05683	0.915	0.236	7.87837e-182
ADPRHL1	1.90915e-185	0.880576	0.822	0.185	3.5957e-181
C1orf105	9.8526e-185	0.514169	0.476	0.037	1.85564e-180
MB	1.19803e-184	0.731611	0.693	0.103	2.25637e-180
APOBEC2	7.34134e-182	0.720832	0.67	0.109	1.38267e-177
A2M	5.61888e-181	1.28878	0.596	0.081	1.05826e-176
BEX3	2.5924e-180	1.31024	0.619	0.082	4.88253e-176
PPP1R12B	2.87302e-171	1.29899	0.933	0.426	5.41105e-167
CRYAB	7.92088e-171	0.965262	0.915	0.294	1.49182e-166
TNNT2	4.21515e-170	1.39447	1	0.636	7.93882e-166
RASSF5	9.77693e-170	0.760838	0.716	0.155	1.84139e-165
TNNI1	7.31323e-168	1.2048	0.995	0.634	1.37737e-163
MLIP	3.19379e-167	0.533475	0.647	0.107	6.01518e-163
SLIT2	2.37159e-165	1.38248	0.852	0.306	4.46666e-161
FBXO32	2.31804e-164	0.773807	0.684	0.139	4.3658e-160
ATP2A2	5.37864e-160	1.44336	0.972	0.945	1.01301e-155
SLC8A1	8.64096e-159	1.09658	0.938	0.387	1.62744e-154
PLN	1.53822e-157	1.17856	0.956	0.487	2.89708e-153
TRDN	2.14726e-157	1.05442	0.866	0.318	4.04415e-153
MYL7	5.38781e-155	1.43706	1	0.736	1.01474e-150
PAM	1.70293e-154	1.6282	0.947	0.745	3.2073e-150
EEF1A2	4.35123e-154	0.892908	0.813	0.269	8.19511e-150
RACK1	5.35611e-153	1.03129	0.603	0.082	1.00877e-148
CACNA1D	5.1998e-151	0.552719	0.577	0.094	9.7933e-147
PPARGC1A	7.89653e-150	0.648774	0.709	0.169	1.48723e-145
CRIP2	1.3262e-149	0.983369	0.924	0.424	2.49776e-145
HRC	1.8872e-148	0.652124	0.732	0.196	3.55436e-144
SGPP2	3.17003e-148	0.535064	0.434	0.043	5.97044e-144
ISL1	1.31507e-146	1.15423	0.815	0.284	2.47681e-142
ERCC-00096	3.3256e-145	1.14709	1	0.999	6.26344e-141
NELL1	7.10501e-145	0.47636	0.432	0.044	1.33816e-140
LRRTM3	1.91514e-142	0.480379	0.404	0.037	3.60698e-138
NORAD	1.15823e-141	0.638962	0.531	0.075	2.18141e-137
SLC25A4	1.91218e-141	1.00831	0.961	0.706	3.60139e-137
TIMP3	2.65984e-141	0.872435	0.778	0.249	5.00955e-137
RPS17	4.06031e-139	0.768097	0.566	0.082	7.64719e-135
HNRNPDL	5.68536e-139	0.803691	0.545	0.079	1.07078e-134
ERCC-00130	7.44347e-138	1.08961	1	1	1.4019e-133
TECRL	1.03817e-137	1.14893	0.982	0.559	1.95528e-133
LINC00998	2.14642e-135	0.547162	0.462	0.059	4.04257e-131
FRMPD4	4.15249e-134	0.325648	0.335	0.021	7.8208e-130
BTG1	1.09513e-132	1.09187	0.908	0.67	2.06258e-128
UNC45B	4.92649e-132	0.752318	0.829	0.275	9.27856e-128
TMEM261	2.08772e-131	0.558601	0.476	0.066	3.93202e-127
ERCC-00113	1.1504e-130	1.11484	1	0.986	2.16666e-126
NCAM1	1.19701e-130	0.997868	0.889	0.549	2.25446e-126
KCNIP4	9.41652e-130	0.506409	0.492	0.078	1.77351e-125
SNTA1	6.39776e-129	0.77595	0.834	0.383	1.20495e-124
RYR2	3.1981e-128	1.03535	0.88	0.493	6.0233e-124
LRRC75A-AS1	5.06648e-128	0.661183	0.536	0.081	9.54221e-124
ERCC-00171	1.05574e-127	1.03746	0.998	0.993	1.98837e-123
PPP1R1A	1.96544e-127	1.08936	0.864	0.48	3.70172e-123
PDLIM5	1.12527e-126	1.0052	0.986	0.866	2.11933e-122
ACTN2	1.39397e-126	0.826962	0.931	0.358	2.62541e-122
LDB3	7.24153e-126	0.838526	0.834	0.29	1.36387e-121
TTN	2.49294e-125	1.24806	0.998	0.787	4.6952e-121
TNNC1	5.08725e-125	0.946675	0.931	0.426	9.58132e-121
ATP1B2	5.33588e-125	0.90472	0.908	0.657	1.00496e-120
HIPK3	6.24518e-125	0.853833	0.737	0.256	1.17622e-120
MDH1	1.93845e-124	0.750135	0.97	0.937	3.65088e-120
MYL4	5.78981e-124	0.999932	0.972	0.563	1.09045e-119
NRTN	8.24734e-124	0.582329	0.63	0.178	1.5533e-119
KIAA0319	9.05097e-124	0.266849	0.349	0.031	1.70466e-119
ITGB1BP2	1.15098e-123	0.532361	0.644	0.156	2.16776e-119
ERCC-00074	2.23553e-123	1.0075	1	1	4.21039e-119
HIST2H2BE	5.85294e-123	0.520672	0.545	0.11	1.10234e-118
ERCC-00002	2.96779e-122	1.02012	1	1	5.58954e-118
GATA6-AS1	5.34336e-122	0.484875	0.4	0.047	1.00637e-117
SYNPO2	3.04231e-121	0.591734	0.626	0.154	5.72988e-117
MITF	5.87246e-121	0.686131	0.769	0.281	1.10602e-116
LAMA2	1.94284e-120	0.686726	0.707	0.228	3.65914e-116
TBX5	2.58849e-119	0.866903	0.889	0.449	4.87517e-115
MYH7B	1.78389e-118	0.422589	0.473	0.075	3.35978e-114
ERCC-00046	5.9328e-118	0.978302	1	0.998	1.11738e-113
LINC00997	1.7272e-117	0.544847	0.42	0.057	3.25301e-113
SNU13	1.23204e-116	0.52269	0.469	0.071	2.32043e-112
TMOD1	4.62391e-116	0.499739	0.656	0.173	8.70867e-112
GPR37	7.36839e-116	0.82222	0.727	0.281	1.38776e-111
CNIH1	5.89988e-115	0.457516	0.418	0.057	1.11118e-110
KMT2E	8.58562e-115	0.497422	0.441	0.064	1.61702e-110
VSNL1	8.98952e-115	0.913742	0.704	0.251	1.69309e-110
TMX4	2.45024e-114	0.81635	0.806	0.417	4.61479e-110
ZNF385B	6.20399e-114	0.621314	0.624	0.169	1.16846e-109
CIRBP	7.55551e-114	0.710743	0.956	0.904	1.423e-109
HACD1	4.47859e-113	0.509759	0.434	0.064	8.43497e-109
NRDC	3.62659e-112	0.525596	0.441	0.066	6.83032e-108
GJA3	1.01274e-111	0.3283	0.37	0.043	1.9074e-107
FAM234A	1.40407e-111	0.440601	0.37	0.043	2.64442e-107
NFIC	7.91973e-111	0.800493	0.818	0.431	1.4916e-106
VEGFC	2.16523e-110	0.546059	0.573	0.144	4.078e-106
TESC	3.29827e-110	0.488052	0.554	0.132	6.21196e-106
CMYA5	1.12619e-109	0.910241	0.875	0.439	2.12107e-105
NDRG2	1.64375e-109	0.687184	0.739	0.324	3.09584e-105
SARAF	1.29986e-108	0.478031	0.476	0.077	2.44816e-104
SRGAP2B	6.36988e-108	0.503364	0.395	0.054	1.1997e-103
CTSV	4.6659e-107	0.551591	0.367	0.045	8.78775e-103
ERCC-00004	6.78662e-107	0.933641	1	0.999	1.27819e-102
ECHDC2	6.86232e-107	0.516545	0.591	0.17	1.29245e-102
NPTN-IT1	8.4645e-107	0.498862	0.393	0.053	1.5942e-102
ALDOA	1.53243e-106	0.658915	0.972	0.96	2.88619e-102
NRXN1	1.91373e-106	0.622792	0.503	0.114	3.60432e-102
PLPP3	8.68924e-106	0.569173	0.388	0.053	1.63653e-101
CORIN	9.59971e-106	0.604321	0.577	0.148	1.80801e-101
LINC01578	1.46883e-105	0.427254	0.425	0.066	2.7664e-101
CSRP3	1.75196e-105	0.574134	0.792	0.247	3.29963e-101
GARNL3	1.90872e-105	0.479859	0.492	0.108	3.59489e-101
CFAP20	2.28206e-105	0.46409	0.397	0.057	4.29804e-101
LSAMP	2.68424e-105	0.718474	0.688	0.248	5.0555e-101
TCAP	1.28209e-104	0.319535	0.39	0.055	2.41468e-100
NEBL	1.84661e-104	0.90206	0.956	0.67	3.4779e-100
DMD	1.1788e-103	0.733621	0.746	0.326	2.22014e-99
LOC642366	3.51467e-103	0.467774	0.464	0.094	6.61953e-99
ENO3	3.8728e-103	0.753981	0.79	0.398	7.29404e-99
HTRA1	1.01947e-102	0.985983	0.79	0.406	1.92008e-98
C7	1.24058e-102	0.767559	0.335	0.039	2.3365e-98
LINC00504	2.47548e-102	0.565465	0.434	0.07	4.66232e-98
TMEM173	3.18114e-102	0.410373	0.483	0.097	5.99135e-98
CCDC69	8.31092e-101	0.520236	0.619	0.193	1.56528e-96
GATSL2	3.29545e-100	0.394906	0.367	0.05	6.20665e-96
COLQ	4.84865e-100	0.456848	0.52	0.132	9.13195e-96
ASAH1	8.67973e-100	0.8663	0.873	0.668	1.63474e-95
CXCL12	1.05285e-99	0.995754	0.642	0.22	1.98294e-95
MYBPHL	1.08008e-99	0.282168	0.339	0.042	2.03422e-95
SCP2	1.83173e-99	0.78911	0.822	0.604	3.44989e-95
BMP5	2.95133e-99	0.773433	0.834	0.497	5.55853e-95
BMP4	2.23896e-98	1.59099	0.82	0.518	4.21685e-94
MT-ND3	5.99404e-98	0.480256	1	1	1.12892e-93
FRMD3	1.07947e-97	0.392831	0.471	0.097	2.03307e-93
THSD7A	3.72985e-97	0.616728	0.709	0.274	7.02481e-93
ACTC1	4.15579e-96	0.701804	1	0.867	7.82702e-92
HDAC9	1.50123e-95	0.516913	0.644	0.216	2.82741e-91
MAGI2-AS3	4.91182e-95	0.74433	0.804	0.428	9.25092e-91
MRPL57	5.63032e-95	0.401606	0.397	0.064	1.06041e-90
ESRRG	7.12034e-95	0.634031	0.654	0.245	1.34104e-90
HAND2-AS1	7.63472e-95	0.425002	0.365	0.052	1.43792e-90
NEXN	9.22792e-95	0.808716	0.864	0.575	1.73799e-90
SLC25A12	3.84603e-93	0.604072	0.732	0.346	7.24362e-89
CORO6	4.02109e-93	0.538505	0.686	0.247	7.57332e-89
ATP5G3	6.46512e-93	0.533079	0.988	0.981	1.21764e-88
COL4A6	3.11302e-92	0.89553	0.822	0.558	5.86307e-88
CDK8	3.67374e-92	0.544194	0.443	0.099	6.91913e-88
LOC105377105	5.02504e-92	0.365395	0.379	0.06	9.46416e-88
TXNIP	5.92914e-92	0.83631	0.894	0.655	1.11669e-87
MYL9	5.93405e-92	0.738046	0.984	0.942	1.11762e-87
TCEAL9	7.19407e-92	0.413875	0.413	0.069	1.35493e-87
ERCC-00136	7.37703e-92	0.842892	0.949	0.786	1.38939e-87
ZFAS1	1.93262e-91	0.430394	0.43	0.075	3.6399e-87
ERCC-00009	2.98189e-91	0.885689	0.982	0.921	5.61609e-87
PDE4DIP	4.59784e-91	0.569785	0.7	0.296	8.65958e-87
FABP3	1.13415e-90	0.552535	0.73	0.291	2.13605e-86
ADGRL1	2.17927e-90	0.373487	0.363	0.054	4.10444e-86
FAM189A2	2.54865e-90	0.485883	0.607	0.188	4.80012e-86
DPF3	1.1564e-88	0.400821	0.374	0.063	2.17797e-84
ERCC-00003	2.98012e-88	0.893158	0.972	0.914	5.61276e-84
KMT2C	5.35749e-88	0.359666	0.372	0.059	1.00903e-83
PTP4A3	1.83046e-87	0.626382	0.723	0.384	3.4475e-83
LOC101928103	2.39801e-87	0.476315	0.388	0.067	4.51641e-83
MTUS2	4.03966e-87	0.424853	0.598	0.185	7.6083e-83
LINC01420	4.94307e-87	0.369901	0.36	0.057	9.30978e-83
VAMP2	7.04814e-87	0.636757	0.903	0.808	1.32745e-82
LINC00888	8.31254e-87	0.316289	0.305	0.038	1.56558e-82
PGAM2	1.40581e-86	0.284646	0.393	0.075	2.6477e-82
LOC55338	1.62726e-86	0.342779	0.353	0.054	3.06479e-82
TDRP	2.36988e-86	0.321152	0.319	0.043	4.46344e-82
ADGRL2	4.27827e-86	0.355866	0.36	0.057	8.05769e-82
ERCC-00108	7.8462e-86	0.8423	0.97	0.897	1.47775e-81
HACD3	1.70846e-85	0.330801	0.395	0.068	3.21771e-81
ZNF106	1.81065e-85	0.363541	0.37	0.06	3.41017e-81
MICU2	2.13084e-85	0.30781	0.344	0.052	4.01322e-81
SMIM19	2.51952e-85	0.345433	0.351	0.055	4.74527e-81
KLHL42	3.11848e-85	0.352539	0.353	0.056	5.87335e-81
MTUS1	4.06975e-85	0.507806	0.573	0.173	7.66496e-81
CDH2	6.2439e-85	0.691529	0.91	0.754	1.17598e-80
TNNI3	1.58314e-84	0.828463	0.681	0.302	2.98169e-80
PNRC1	1.60844e-84	0.658651	0.891	0.78	3.02934e-80
RGS6	1.62484e-84	0.334867	0.363	0.064	3.06022e-80
ERBIN	2.48637e-84	0.358546	0.37	0.061	4.68284e-80
C11orf72	4.88863e-84	0.317754	0.337	0.05	9.20725e-80
SMIM10L1	8.1991e-84	0.323108	0.342	0.052	1.54422e-79
ZAK	1.25882e-83	0.728895	0.878	0.677	2.37085e-79
MXRA7	1.74886e-83	0.615924	0.928	0.829	3.29379e-79
TRH	2.70366e-83	0.893089	0.667	0.246	5.09207e-79
PPP1R13B	2.79996e-83	0.36709	0.508	0.144	5.27344e-79
LOC729348	5.60628e-83	0.399303	0.374	0.064	1.05589e-78
CPEB4	1.07027e-82	0.687093	0.797	0.522	2.01574e-78
COL4A5	1.93514e-82	0.696171	0.88	0.744	3.64465e-78
SC5D	2.23388e-82	0.303229	0.349	0.055	4.20729e-78
PLCL1	3.67171e-82	0.256325	0.33	0.051	6.9153e-78
CHCHD10	4.62286e-82	0.589102	0.921	0.804	8.70669e-78
HAND2	8.77642e-82	0.660567	0.912	0.524	1.65295e-77
MTERF2	9.7574e-82	0.282948	0.291	0.037	1.83771e-77
PLCB1	1.01231e-81	0.749218	0.711	0.392	1.90658e-77
LRRC10	2.44194e-81	0.378777	0.397	0.075	4.59915e-77
NEAT1	5.29093e-81	0.718709	0.697	0.339	9.96494e-77
SPEG	8.49077e-81	0.635287	0.781	0.466	1.59915e-76
SULT1C4	9.4434e-81	0.332755	0.33	0.052	1.77857e-76
GOLIM4	1.11155e-80	0.778531	0.732	0.409	2.09349e-76
TOMM70	3.20219e-80	0.32358	0.337	0.053	6.03101e-76
COPS9	4.96663e-80	0.274291	0.335	0.053	9.35416e-76
SORBS2	5.10127e-80	0.570159	0.882	0.465	9.60773e-76
FAM127A	5.59525e-80	0.569203	0.91	0.855	1.05381e-75
COX7B	7.53097e-80	0.572003	0.952	0.949	1.41838e-75
KMT5B	9.39768e-80	0.307879	0.333	0.053	1.76996e-75
TMEM263	1.56238e-79	0.362169	0.358	0.062	2.94258e-75
MGST3	3.61081e-79	0.596568	0.924	0.848	6.8006e-75
PSD3	4.26668e-79	0.580282	0.778	0.472	8.03586e-75
GOT1	1.05989e-78	0.660488	0.836	0.69	1.9962e-74
SF3B6	2.30786e-78	0.371705	0.36	0.064	4.34661e-74
MYO18B	2.95791e-78	0.400491	0.591	0.191	5.57093e-74
OTUD6B-AS1	3.64185e-78	0.273872	0.298	0.042	6.85906e-74
TCAF1	8.5195e-78	0.329712	0.404	0.075	1.60456e-73
KMT2A	1.32577e-77	0.38745	0.365	0.066	2.49695e-73
MIEF1	1.34567e-77	0.313664	0.319	0.049	2.53444e-73
AES	1.71822e-77	0.550996	0.905	0.84	3.23609e-73
P3H4	1.79248e-77	0.293118	0.316	0.048	3.37596e-73
RSPO3	3.26802e-77	0.508466	0.363	0.067	6.15499e-73
NR2F2	5.76936e-77	0.785066	0.852	0.53	1.0866e-72
RTCB	8.16274e-77	0.331502	0.356	0.063	1.53737e-72
NADK2	1.23369e-76	0.304836	0.307	0.046	2.32353e-72
ERCC-00042	1.62122e-76	0.832131	0.991	0.932	3.05341e-72
PROX1	2.31288e-76	0.512821	0.607	0.239	4.35607e-72
TSPAN2	2.74816e-76	0.621656	0.744	0.38	5.17589e-72
LMO7	4.40385e-76	0.519007	0.709	0.296	8.29421e-72
ATP5B	4.6201e-76	0.418505	0.982	0.995	8.7015e-72
MYOZ2	6.29733e-76	0.51198	0.781	0.294	1.18604e-71
MIR133A1HG	8.61464e-76	0.282251	0.256	0.029	1.62248e-71
COX20	1.24979e-75	0.568392	0.552	0.199	2.35385e-71
ABHD18	1.614e-75	0.26067	0.293	0.042	3.0398e-71
SMYD1	3.68981e-75	0.549555	0.824	0.415	6.94938e-71
ACOT13	3.89127e-75	0.620619	0.841	0.724	7.32881e-71
ABHD17A	4.20289e-75	0.26562	0.305	0.046	7.91573e-71
TOM1L2	4.72693e-75	0.504477	0.651	0.303	8.9027e-71
TRIM52-AS1	6.12987e-75	0.272552	0.282	0.038	1.1545e-70
RNA45S5	7.58284e-75	0.429901	0.365	0.067	1.42815e-70
SRPRA	1.29512e-74	0.32636	0.335	0.058	2.43923e-70
CACNB2	2.9055e-74	0.433002	0.591	0.209	5.47221e-70
TPM1	4.37031e-74	0.593978	1	0.988	8.23104e-70
MEF2A	5.50479e-74	0.591074	0.859	0.656	1.03677e-69
TMEM259	5.55258e-74	0.252004	0.293	0.043	1.04577e-69
GHET1	9.36248e-74	0.272574	0.307	0.048	1.76333e-69
FGF9	2.5531e-73	0.257699	0.342	0.063	4.80851e-69
PCNX1	3.84881e-73	0.254445	0.305	0.048	7.24885e-69
TNFAIP8	3.989e-73	0.490629	0.61	0.272	7.51289e-69
SGCA	5.86013e-73	0.397556	0.543	0.187	1.1037e-68
FLJ44635	7.60674e-73	0.368002	0.423	0.102	1.43265e-68
LINC01000	8.95712e-73	0.294064	0.339	0.06	1.68698e-68
BMP7	1.35162e-72	0.612203	0.644	0.304	2.54563e-68
LGALS3BP	1.70399e-72	0.499868	0.693	0.336	3.2093e-68
ERCC-00145	1.90771e-72	0.729159	0.938	0.777	3.59297e-68
LOC101929486	2.24636e-71	0.37142	0.323	0.056	4.23079e-67
GPI	1.05484e-70	0.515308	0.926	0.897	1.98668e-66
HSPB2	1.6086e-70	0.370481	0.446	0.116	3.02964e-66
CLIC5	1.72483e-70	0.288314	0.374	0.079	3.24854e-66
TMED4	2.39767e-70	0.517966	0.568	0.225	4.51577e-66
ADGRA3	2.90057e-70	0.272014	0.293	0.046	5.46294e-66
LIMCH1	4.17332e-70	0.603577	0.651	0.297	7.86002e-66
ASPH	4.72039e-70	0.61179	0.834	0.726	8.89038e-66
UBR3	6.22671e-70	0.63606	0.774	0.555	1.17274e-65
ADAM11	6.64463e-70	0.361179	0.464	0.137	1.25145e-65
LINC01089	1.80104e-69	0.254555	0.266	0.037	3.39209e-65
ANOS1	2.74927e-69	0.25581	0.245	0.03	5.17798e-65
COX5B	2.92964e-69	0.528852	0.931	0.92	5.51768e-65
ZNF271P	5.31622e-69	0.296697	0.305	0.051	1.00126e-64
PPP1R3C	5.3585e-69	0.508504	0.589	0.222	1.00922e-64
REEP1	5.4895e-69	0.383745	0.557	0.188	1.03389e-64
ETV1	6.12454e-69	0.585669	0.725	0.393	1.1535e-64
FBXO9	1.14942e-68	0.541555	0.836	0.721	2.16481e-64
SEPW1	1.55797e-68	0.423388	0.977	0.976	2.93428e-64
RPS6KA2	6.48729e-68	0.63243	0.697	0.368	1.22182e-63
ATXN1	8.25266e-68	0.465641	0.654	0.297	1.55431e-63
LAPTM4B	2.26533e-67	0.502314	0.954	0.962	4.26653e-63
ATP1A2	7.31669e-67	0.593334	0.589	0.258	1.37803e-62
FAAP20	1.16192e-66	0.259109	0.305	0.053	2.18835e-62
PKIA	1.17425e-66	0.560809	0.739	0.449	2.21159e-62
HCN4	1.26759e-66	0.611001	0.824	0.468	2.38738e-62
RBM24	2.01887e-66	0.568791	0.845	0.575	3.80234e-62
ATP5H	2.73741e-66	0.478945	0.919	0.939	5.15564e-62
NKX2-5	3.25094e-66	0.392921	0.432	0.109	6.12282e-62
CCDC18-AS1	3.7252e-66	0.269152	0.284	0.045	7.01605e-62
CLGN	4.83467e-66	0.503825	0.6	0.273	9.10562e-62
VEGFB	5.8982e-66	0.499244	0.799	0.604	1.11087e-61
GATM	7.65826e-66	0.580005	0.589	0.217	1.44236e-61
MCUR1	7.88258e-66	0.269492	0.286	0.047	1.4846e-61
DENND1B	9.69252e-66	0.424574	0.573	0.246	1.82549e-61
PPP4R3B	1.32543e-65	0.268264	0.298	0.051	2.49631e-61
PRR16	1.75785e-65	0.32688	0.254	0.037	3.31074e-61
ERCC-00111	2.92434e-65	0.764179	0.94	0.884	5.50771e-61
PWARSN	3.16213e-65	0.250151	0.284	0.046	5.95555e-61
SYNPO2L	3.33621e-65	0.523335	0.723	0.3	6.28341e-61
NFIA	3.53144e-65	0.413364	0.51	0.168	6.65112e-61
LAMB2	6.21635e-65	0.56758	0.79	0.618	1.17079e-60
MPP6	8.98883e-65	0.672668	0.707	0.466	1.69296e-60
DKK1	9.31492e-65	0.951516	0.55	0.205	1.75437e-60
ERCC-00060	2.97567e-64	0.727307	0.972	0.937	5.60437e-60
PRKAR2A	3.2593e-64	0.456222	0.45	0.14	6.13857e-60
ATP1B1	4.28616e-64	0.563523	0.82	0.635	8.07255e-60
SLIT3	5.95952e-64	0.472166	0.7	0.32	1.12242e-59
NPTN	9.34038e-64	0.532005	0.889	0.827	1.75917e-59
NUDT4	1.10285e-63	0.553679	0.63	0.316	2.07711e-59
PLCB4	1.41352e-63	0.482318	0.603	0.284	2.66223e-59
SSPN	2.45269e-63	0.460685	0.545	0.212	4.61941e-59
SMDT1	2.91567e-63	0.278288	0.293	0.052	5.49137e-59
REEP3	3.88278e-63	0.514726	0.776	0.588	7.31283e-59
ABLIM1	5.2481e-63	0.535678	0.859	0.679	9.88427e-59
RORA	6.16514e-63	0.311976	0.4	0.11	1.16114e-58
SVIL	1.18228e-62	0.538039	0.838	0.609	2.22671e-58
PPIC	2.42134e-62	0.511495	0.76	0.464	4.56035e-58
LHFP	6.97681e-62	0.49444	0.707	0.373	1.31401e-57
SMARCD3	7.17065e-62	0.462194	0.76	0.474	1.35052e-57
HSPB1	9.11839e-62	0.35417	0.995	0.974	1.71736e-57
PDHA1	1.1011e-61	0.497843	0.885	0.834	2.07382e-57
MYZAP	2.11774e-61	0.257495	0.3	0.06	3.98855e-57
LINC00648	3.1984e-61	0.340151	0.416	0.122	6.02386e-57
KANK1	7.61533e-61	0.538395	0.686	0.384	1.43427e-56
FILIP1	7.75141e-61	0.532711	0.744	0.407	1.4599e-56
MT-ND1	8.86432e-61	0.277491	1	1	1.66951e-56
GSTO1	2.1159e-60	0.562516	0.889	0.796	3.98509e-56
ARL6IP5	2.48937e-60	0.49302	0.882	0.842	4.68848e-56
KIFAP3	3.39483e-60	0.584984	0.714	0.435	6.39382e-56
COX6A2	2.74651e-59	0.282739	0.279	0.052	5.17277e-55
RBPMS2	2.75495e-59	0.504127	0.891	0.876	5.18868e-55
NNT	9.42651e-59	0.544317	0.755	0.558	1.77539e-54
PRDX2	1.31072e-58	0.456106	0.935	0.942	2.46861e-54
PMP22	2.75473e-58	0.563771	0.499	0.192	5.18825e-54
CCDC141	3.61384e-58	0.524685	0.746	0.47	6.80631e-54
HK1	5.02151e-58	0.514755	0.861	0.796	9.45752e-54
NFIB	1.3178e-57	0.488419	0.723	0.446	2.48194e-53
COX6B1	1.38431e-57	0.427846	0.933	0.952	2.6072e-53
BCL6	4.59058e-57	0.365948	0.42	0.134	8.64591e-53
ZNF436	5.79698e-57	0.335336	0.497	0.188	1.0918e-52
FAM168A	5.98018e-57	0.271468	0.279	0.054	1.12631e-52
CADPS	2.56637e-56	0.363319	0.492	0.176	4.83351e-52
ATP5J	3.28344e-56	0.412283	0.961	0.975	6.18403e-52
RNF207	4.96141e-56	0.367934	0.545	0.23	9.34431e-52
NDUFA4	6.13677e-56	0.414482	0.988	0.996	1.1558e-51
NDUFA1	1.93985e-55	0.476777	0.901	0.896	3.65351e-51
MSRB3	2.05982e-55	0.45549	0.755	0.425	3.87946e-51
PPP1R14C	2.35697e-55	0.298359	0.457	0.139	4.43913e-51
CAMK2D	2.89115e-55	0.452019	0.885	0.701	5.44519e-51
MIR100HG	6.57021e-55	0.265192	0.467	0.151	1.23743e-50
PLEKHA6	6.81074e-55	0.349828	0.48	0.18	1.28273e-50
ZNF704	1.78229e-54	0.473393	0.686	0.409	3.35676e-50
PLCL2	2.2648e-54	0.523386	0.614	0.324	4.26553e-50
FHOD3	5.34942e-54	0.427942	0.621	0.301	1.00751e-49
CFLAR	6.40211e-54	0.559783	0.804	0.696	1.20577e-49
PDK1	1.39693e-53	0.48679	0.864	0.694	2.63099e-49
FXYD1	1.53945e-53	0.307567	0.464	0.163	2.89941e-49
MSI2	2.00062e-53	0.469074	0.467	0.18	3.76797e-49
EPHA7	2.95057e-53	0.448003	0.522	0.216	5.5571e-49
ERCC-00043	5.10475e-53	0.670692	0.878	0.747	9.61428e-49
WNT5A	1.85781e-52	0.709284	0.654	0.394	3.499e-48
MPC1	3.32476e-52	0.467817	0.693	0.431	6.26185e-48
ZBTB20	3.44909e-52	0.397617	0.432	0.149	6.49601e-48
NRP1	3.5778e-52	0.530827	0.748	0.489	6.73844e-48
CFL2	4.38457e-52	0.478118	0.868	0.754	8.2579e-48
CRIP1	5.68028e-52	0.365986	0.49	0.183	1.06982e-47
MLLT3	1.62267e-51	0.332282	0.522	0.222	3.05614e-47
MEF2C	1.8095e-51	0.442655	0.737	0.399	3.40801e-47
PRDX1	1.93234e-51	0.574529	0.954	0.985	3.63938e-47
DPP7	3.31128e-51	0.420224	0.57	0.258	6.23647e-47
NREP	1.11134e-50	0.525442	0.975	0.963	2.0931e-46
ATP5D	2.45244e-50	0.471825	0.841	0.769	4.61892e-46
PPM1K	2.58236e-50	0.671245	0.704	0.501	4.86361e-46
MOAP1	2.7519e-50	0.368123	0.6	0.321	5.18293e-46
FEZ1	2.97499e-50	0.438244	0.649	0.356	5.60311e-46
EFNA1	3.75505e-50	0.32253	0.517	0.222	7.07227e-46
DOK4	6.80499e-50	0.453197	0.836	0.507	1.28165e-45
CAMK2A	1.04544e-49	0.256186	0.323	0.084	1.96898e-45
JMJD1C	1.87708e-49	0.549811	0.811	0.736	3.5353e-45
TRIM55	2.68792e-49	0.36394	0.661	0.312	5.06243e-45
VLDLR	2.83627e-49	0.34795	0.527	0.233	5.34184e-45
WLS	5.08183e-49	0.637993	0.891	0.753	9.57112e-45
LDHA	7.39495e-49	0.583217	0.933	0.924	1.39276e-44
TBX3	1.32875e-48	0.634722	0.483	0.207	2.50256e-44
TRIM54	1.56801e-48	0.278116	0.4	0.133	2.9532e-44
KIAA1456	2.16278e-48	0.316379	0.469	0.192	4.07338e-44
HADHB	3.69813e-48	0.450917	0.838	0.774	6.96505e-44
ATP5L	1.46525e-47	0.376126	0.935	0.961	2.75964e-43
GABARAPL2	3.05287e-47	0.462702	0.841	0.811	5.74977e-43
RNF150	1.18748e-46	0.424745	0.656	0.398	2.23649e-42
FAM78A	1.84585e-46	0.328097	0.494	0.2	3.47648e-42
UQCRB	2.07997e-46	0.482602	0.794	0.689	3.91742e-42
SOBP	2.19106e-46	0.412541	0.533	0.257	4.12665e-42
HCN1	2.94114e-46	0.351442	0.478	0.198	5.53934e-42
TP53INP2	4.37315e-46	0.476965	0.679	0.403	8.23639e-42
FRY	5.14018e-46	0.250117	0.439	0.163	9.68102e-42
RAB9B	2.08347e-45	0.307509	0.363	0.119	3.924e-41
NDUFA5	7.01331e-45	0.433317	0.827	0.788	1.32089e-40
FBXL17	7.52909e-45	0.30604	0.49	0.215	1.41803e-40
NDUFB5	9.7933e-45	0.3971	0.873	0.89	1.84447e-40
PDK2	2.77153e-44	0.45414	0.684	0.469	5.2199e-40
NDUFC1	2.99516e-44	0.407972	0.896	0.889	5.64108e-40
LINC00674	4.36993e-44	0.471904	0.774	0.701	8.23033e-40
SPTBN1	1.0796e-43	0.422155	0.88	0.882	2.03333e-39
UQCRC2	2.26819e-43	0.390137	0.88	0.887	4.27191e-39
GSN	3.67477e-43	0.446371	0.626	0.395	6.92105e-39
MAST4	4.814e-43	0.354806	0.494	0.23	9.06669e-39
ADD1	5.7369e-43	0.486778	0.866	0.898	1.08049e-38
RNPC3	8.21289e-43	0.452228	0.624	0.407	1.54682e-38
CAV2	9.75003e-43	0.433092	0.674	0.4	1.83632e-38
LACC1	1.92718e-42	0.391085	0.425	0.171	3.62965e-38
ZC2HC1A	2.24491e-42	0.455521	0.723	0.556	4.22807e-38
SREBF2	2.54059e-42	0.678677	0.656	0.512	4.78495e-38
NEK7	3.16938e-42	0.431192	0.732	0.543	5.9692e-38
MMP15	3.97018e-42	0.423518	0.697	0.492	7.47744e-38
ERBB4	4.26088e-42	0.364984	0.568	0.279	8.02495e-38
CBX6	6.3347e-42	0.397903	0.677	0.478	1.19308e-37
UQCR10	6.68514e-42	0.421062	0.864	0.848	1.25908e-37
LBH	1.06419e-41	0.481524	0.661	0.401	2.0043e-37
CUX1	1.89725e-41	0.441228	0.836	0.784	3.57328e-37
UQCR11	3.99572e-41	0.419449	0.852	0.805	7.52553e-37
PNKD	4.31343e-41	0.4031	0.727	0.576	8.12391e-37
VWDE	7.22843e-41	0.513027	0.783	0.637	1.3614e-36
KLHL24	7.59013e-41	0.430817	0.723	0.566	1.42952e-36
ARHGAP31	7.62767e-41	0.349628	0.545	0.29	1.4366e-36
MGAT5	1.1725e-40	0.527144	0.628	0.426	2.20828e-36
FER	1.76759e-40	0.367717	0.436	0.19	3.32909e-36
ATP5A1	1.84873e-40	0.276557	0.975	0.994	3.4819e-36
ETFB	2.10167e-40	0.407139	0.755	0.59	3.95829e-36
PRKAR2B	2.67184e-40	0.435928	0.628	0.401	5.03214e-36
EPM2AIP1	3.30991e-40	0.413791	0.829	0.777	6.23388e-36
DOK6	4.13118e-40	0.339728	0.439	0.187	7.78067e-36
MXI1	4.95016e-40	0.413777	0.584	0.353	9.32314e-36
ATP6V1G2	5.03398e-40	0.283739	0.448	0.199	9.481e-36
COX7C	7.25353e-40	0.337507	0.988	0.995	1.36613e-35
ZDHHC2	9.45082e-40	0.404478	0.658	0.46	1.77997e-35
ATP5O	1.24527e-39	0.336102	0.949	0.97	2.34535e-35
PPP4R2	1.35031e-39	0.423333	0.515	0.279	2.54317e-35
MALAT1	1.90646e-39	0.638123	0.984	0.978	3.59062e-35
IDH2	3.32087e-39	0.405462	0.827	0.754	6.25452e-35
PTK2B	3.40273e-39	0.399234	0.485	0.233	6.40871e-35
MTFR1L	3.93461e-39	0.380645	0.651	0.458	7.41044e-35
FRMD4B	4.40234e-39	0.446782	0.732	0.505	8.29137e-35
COX6C	6.84687e-39	0.37773	0.938	0.957	1.28954e-34
LTBP3	7.17114e-39	0.270717	0.425	0.18	1.35061e-34
ADCY6	9.05044e-39	0.3383	0.587	0.345	1.70456e-34
ASB2	1.76793e-38	0.263644	0.39	0.139	3.32973e-34
SPOCK1	2.74391e-38	0.280602	0.3	0.094	5.16788e-34
CISD1	3.45783e-38	0.40124	0.764	0.652	6.51247e-34
ABAT	7.40972e-38	0.342572	0.402	0.165	1.39555e-33
GBAS	8.30678e-38	0.385859	0.831	0.804	1.5645e-33
CYCS	1.42329e-37	0.3874	0.945	0.94	2.68063e-33
MYOZ1	1.8428e-37	0.409146	0.46	0.23	3.47073e-33
ALDH1A1	4.62076e-37	0.514775	0.229	0.055	8.70274e-33
STRN	4.62893e-37	0.402031	0.783	0.685	8.71813e-33
TMEM87A	5.62391e-37	0.457976	0.769	0.678	1.05921e-32
ST3GAL1	6.78652e-37	0.43126	0.688	0.468	1.27817e-32
ECH1	9.05195e-37	0.330612	0.891	0.916	1.70484e-32
ZFP36L1	2.14608e-36	0.380953	0.963	0.948	4.04193e-32
MYH7	2.60317e-36	0.600563	0.386	0.138	4.90281e-32
PROS1	2.87629e-36	0.345032	0.596	0.364	5.41721e-32
FIGN	3.60391e-36	0.420255	0.54	0.321	6.78759e-32
FNIP2	4.28739e-36	0.393601	0.605	0.394	8.07488e-32
ASB8	4.75502e-36	0.346828	0.531	0.299	8.9556e-32
BNIP3	6.15173e-36	0.494267	0.857	0.818	1.15862e-31
YPEL3	7.24516e-36	0.360321	0.691	0.524	1.36455e-31
DSTN	8.78343e-36	0.346051	0.921	0.935	1.65427e-31
BAG3	9.99102e-36	0.390502	0.679	0.5	1.88171e-31
MYL3	1.27869e-35	0.517757	0.513	0.238	2.40829e-31
RBM38	3.14381e-35	0.413987	0.734	0.56	5.92105e-31
MAP1B	3.77706e-35	0.519283	0.94	0.958	7.11371e-31
BMPR2	5.82715e-35	0.374609	0.711	0.539	1.09749e-30
B2M	5.84662e-35	0.39256	0.861	0.835	1.10115e-30
TRIB1	7.4646e-35	0.398242	0.6	0.364	1.40588e-30
RNF208	1.08865e-34	0.319043	0.448	0.212	2.05036e-30
COX5A	1.15114e-34	0.348241	0.933	0.962	2.16805e-30
SIRPA	1.85831e-34	0.305031	0.501	0.256	3.49994e-30
MAPKAPK2	3.61177e-34	0.366667	0.79	0.711	6.80241e-30
PITPNB	5.83275e-34	0.429643	0.767	0.73	1.09854e-29
FEM1B	1.55024e-33	0.319863	0.409	0.187	2.91972e-29
TMBIM6	4.98334e-33	0.329944	0.954	0.979	9.38563e-29
ABCC5	8.39645e-33	0.41778	0.619	0.458	1.58139e-28
DAZAP2	1.00706e-32	0.352689	0.663	0.484	1.8967e-28
RASL10B	1.16093e-32	0.358162	0.697	0.511	2.1865e-28
SLC20A2	1.59062e-32	0.309756	0.617	0.382	2.99577e-28
CASZ1	1.94768e-32	0.265031	0.54	0.276	3.66827e-28
WIPF3	2.01478e-32	0.389	0.607	0.424	3.79463e-28
GNAQ	2.0456e-32	0.296017	0.416	0.196	3.85268e-28
SMAD9	2.66279e-32	0.35951	0.564	0.344	5.0151e-28
BAMBI	2.96495e-32	0.382839	0.861	0.686	5.58418e-28
MKRN1	3.42278e-32	0.358714	0.864	0.862	6.44647e-28
ANAPC16	3.97538e-32	0.376874	0.82	0.775	7.48724e-28
COX8A	4.64723e-32	0.290355	0.968	0.985	8.7526e-28
ATP5C1	4.81995e-32	0.287863	0.947	0.964	9.0779e-28
DES	5.01538e-32	0.352101	0.418	0.181	9.44596e-28
C14orf2	5.60817e-32	0.347607	0.903	0.9	1.05624e-27
SEMA3C	6.39769e-32	0.486524	0.52	0.295	1.20494e-27
STAT3	6.9659e-32	0.37869	0.665	0.514	1.31196e-27
WSB1	1.54608e-31	0.395615	0.896	0.925	2.91189e-27
GSTM4	1.64101e-31	0.371055	0.587	0.393	3.09068e-27
LPGAT1	1.67864e-31	0.503411	0.686	0.571	3.16156e-27
DIXDC1	1.91256e-31	0.428452	0.686	0.537	3.60212e-27
RASD1	2.05862e-31	0.254343	0.314	0.112	3.8772e-27
EDNRA	2.33972e-31	0.347971	0.744	0.504	4.40663e-27
HAMP	2.69751e-31	0.339843	0.192	0.044	5.08049e-27
PTGES3L	5.39557e-31	0.28812	0.446	0.225	1.0162e-26
SOD2	6.75011e-31	0.374543	0.734	0.642	1.27132e-26
PAG1	7.11452e-31	0.322407	0.423	0.2	1.33995e-26
ACADVL	7.49269e-31	0.365077	0.774	0.734	1.41117e-26
ERCC-00022	9.92423e-31	0.574424	0.73	0.573	1.86913e-26
CDC42EP3	1.68532e-30	0.499398	0.762	0.619	3.17414e-26
KCNH2	2.20418e-30	0.264953	0.499	0.269	4.15136e-26
LGI2	2.48322e-30	0.276885	0.649	0.372	4.6769e-26
KIF1C	4.58345e-30	0.330356	0.693	0.559	8.63247e-26
TSC22D1	6.63351e-30	0.425382	0.901	0.888	1.24936e-25
UNC5B	8.4318e-30	0.37384	0.804	0.717	1.58804e-25
PRKAG2	1.28289e-29	0.322179	0.568	0.337	2.41619e-25
C20orf166-AS1	1.49105e-29	0.25322	0.55	0.296	2.80825e-25
MICAL3	1.7882e-29	0.285589	0.527	0.324	3.36789e-25
TNRC18	1.82326e-29	0.291679	0.568	0.358	3.43393e-25
GNG12	2.13283e-29	0.38408	0.739	0.602	4.01698e-25
SERINC1	2.20115e-29	0.369384	0.781	0.771	4.14565e-25
PPFIA2	2.31292e-29	0.334168	0.358	0.159	4.35615e-25
FZD1	4.88156e-29	0.284927	0.547	0.311	9.19392e-25
MGARP	5.90453e-29	0.371789	0.501	0.283	1.11206e-24
IRF2BPL	6.74161e-29	0.335457	0.684	0.542	1.26971e-24
MTHFR	1.44193e-28	0.301291	0.522	0.336	2.71573e-24
OAZ2	2.2346e-28	0.353136	0.811	0.792	4.20864e-24
ZFHX3	2.39064e-28	0.342736	0.656	0.458	4.50254e-24
ARL5A	3.15538e-28	0.350969	0.831	0.826	5.94285e-24
CD47	3.82044e-28	0.405585	0.635	0.488	7.19541e-24
CD59	3.91825e-28	0.395764	0.788	0.79	7.37964e-24
ZNF827	5.81595e-28	0.383124	0.64	0.481	1.09538e-23
ZKSCAN8	6.36981e-28	0.28001	0.323	0.133	1.19969e-23
GAB1	6.84036e-28	0.356506	0.628	0.481	1.28831e-23
PTTG1IP	1.09114e-27	0.294123	0.894	0.924	2.05505e-23
GSTK1	1.63131e-27	0.346258	0.7	0.589	3.07241e-23
S1PR3	1.95883e-27	0.306998	0.439	0.233	3.68927e-23
MPPED2	2.66674e-27	0.333972	0.527	0.322	5.02254e-23
ATE1	3.76343e-27	0.27471	0.416	0.219	7.08805e-23
GPX7	4.26777e-27	0.336386	0.642	0.496	8.03791e-23
PALLD	4.44056e-27	0.272992	0.882	0.846	8.36335e-23
EGR1	4.695e-27	0.445041	0.305	0.125	8.84257e-23
RGS3	5.1444e-27	0.301219	0.598	0.399	9.68896e-23
TBC1D4	6.65936e-27	0.340661	0.598	0.434	1.25422e-22
MACF1	7.42481e-27	0.347649	0.85	0.886	1.39839e-22
ITGAV	1.56283e-26	0.296468	0.762	0.668	2.94343e-22
ERCC-00076	2.42006e-26	0.494745	0.714	0.57	4.55795e-22
DCAF6	3.27964e-26	0.320829	0.589	0.423	6.17687e-22
PRKAA2	3.47789e-26	0.358419	0.63	0.493	6.55025e-22
TDP2	4.78446e-26	0.368933	0.714	0.647	9.01105e-22
PCGF5	5.05262e-26	0.281301	0.545	0.327	9.51611e-22
NFYC	5.06901e-26	0.324373	0.707	0.618	9.54697e-22
GAS6	5.18715e-26	0.258364	0.478	0.27	9.76949e-22
NDUFA8	5.27669e-26	0.321827	0.684	0.587	9.93812e-22
HOMER1	7.86085e-26	0.328959	0.575	0.42	1.48051e-21
MRAS	8.12174e-26	0.305156	0.621	0.423	1.52965e-21
HIF3A	8.16508e-26	0.339571	0.677	0.55	1.53781e-21
PRICKLE1	8.71268e-26	0.299454	0.677	0.458	1.64095e-21
MYLK3	9.42392e-26	0.381061	0.626	0.441	1.7749e-21
FAM214A	1.41204e-25	0.301872	0.529	0.341	2.65944e-21
PPP1R16A	1.50418e-25	0.253536	0.533	0.352	2.83297e-21
IDH3A	1.87646e-25	0.337135	0.55	0.372	3.53413e-21
CPVL	2.13805e-25	0.350201	0.644	0.525	4.0268e-21
ELL2	2.23271e-25	0.383813	0.612	0.469	4.20509e-21
DKK3	2.69541e-25	0.331509	0.711	0.566	5.07654e-21
MLF1	4.10665e-25	0.393445	0.612	0.492	7.73447e-21
JAG1	7.51458e-25	0.351083	0.707	0.557	1.4153e-20
DACT3	7.54325e-25	0.297648	0.617	0.426	1.4207e-20
AKAP9	1.03758e-24	0.372342	0.783	0.769	1.95417e-20
HIST1H2BK	1.29369e-24	0.278629	0.573	0.384	2.43653e-20
ALPK3	1.33693e-24	0.35475	0.723	0.595	2.51797e-20
PFKM	1.8088e-24	0.306605	0.776	0.758	3.4067e-20
RBMS1	2.07754e-24	0.303904	0.838	0.823	3.91284e-20
PTPRD	2.24783e-24	0.333172	0.824	0.777	4.23356e-20
PFKP	2.68214e-24	0.265177	0.868	0.775	5.05155e-20
RBFOX2	3.07884e-24	0.295874	0.898	0.916	5.79868e-20
INPP5A	5.19784e-24	0.322949	0.633	0.507	9.78961e-20
NDUFA11	5.20779e-24	0.305738	0.859	0.878	9.80835e-20
ARMCX3	5.7583e-24	0.323538	0.716	0.628	1.08452e-19
POPDC3	6.13518e-24	0.331516	0.536	0.333	1.1555e-19
COX4I1	6.37637e-24	0.252309	0.968	0.992	1.20093e-19
ERCC-00092	6.80259e-24	0.400874	0.688	0.556	1.2812e-19
NDRG4	7.72337e-24	0.293658	0.425	0.236	1.45462e-19
GOLGA8A	8.50605e-24	0.280033	0.51	0.327	1.60203e-19
CITED4	1.60092e-23	0.394068	0.614	0.478	3.01517e-19
ERCC-00116	2.3498e-23	0.38826	0.499	0.323	4.42561e-19
ADD3	2.51115e-23	0.382746	0.843	0.859	4.72951e-19
ARMCX6	2.5882e-23	0.328101	0.727	0.633	4.87462e-19
APCDD1L	4.00102e-23	0.252179	0.199	0.064	7.53551e-19
ERCC-00112	4.48205e-23	0.314015	0.476	0.292	8.4415e-19
BAZ2B	5.26909e-23	0.422517	0.721	0.673	9.92381e-19
RAB2A	5.91366e-23	0.292944	0.861	0.876	1.11378e-18
BVES	7.80285e-23	0.300404	0.545	0.328	1.46959e-18
ZNF91	9.87625e-23	0.368324	0.674	0.621	1.86009e-18
DMPK	1.05256e-22	0.280534	0.573	0.407	1.98239e-18
LDHB	1.08138e-22	0.256123	0.97	0.993	2.03667e-18
LHFPL2	1.46202e-22	0.337985	0.693	0.614	2.75356e-18
FGD6	1.68007e-22	0.351738	0.633	0.519	3.16424e-18
MLLT6	1.76694e-22	0.299852	0.621	0.47	3.32786e-18
SUCLG1	1.83832e-22	0.309292	0.767	0.716	3.4623e-18
PKP2	2.13732e-22	0.311778	0.815	0.673	4.02544e-18
ARRDC4	2.2708e-22	0.280684	0.453	0.263	4.27682e-18
SEMA5A	4.95944e-22	0.350904	0.658	0.522	9.34061e-18
SLC7A2	6.0577e-22	0.405248	0.697	0.626	1.14091e-17
KIAA1324L	6.89816e-22	0.328393	0.707	0.607	1.2992e-17
SIRT2	7.51533e-22	0.27513	0.568	0.404	1.41544e-17
SIPA1L2	7.98295e-22	0.340034	0.734	0.587	1.50351e-17
FOXP1	8.49324e-22	0.298402	0.824	0.752	1.59962e-17
PYGM	8.76338e-22	0.251419	0.416	0.235	1.65049e-17
APP	1.4029e-21	0.327072	0.885	0.924	2.64222e-17
FHL2	1.45537e-21	0.25451	0.57	0.401	2.74105e-17
GNA11	3.28786e-21	0.257383	0.455	0.283	6.19236e-17
RGS4	3.49667e-21	0.471264	0.339	0.163	6.58562e-17
GPC1	4.09005e-21	0.28548	0.614	0.49	7.7032e-17
QPRT	5.089e-21	0.367094	0.76	0.752	9.58463e-17
AKAP13	5.1903e-21	0.307076	0.753	0.732	9.77541e-17
NES	8.45834e-21	0.274334	0.873	0.846	1.59304e-16
UBE2B	1.09223e-20	0.288507	0.758	0.73	2.0571e-16
KIF13A	1.1397e-20	0.315952	0.723	0.672	2.14652e-16
DHRS9	1.16184e-20	0.550771	0.238	0.093	2.18821e-16
BZW2	2.22388e-20	0.267399	0.824	0.791	4.18845e-16
NCOA1	2.26901e-20	0.307125	0.707	0.629	4.27345e-16
TRIM44	2.52044e-20	0.327198	0.718	0.679	4.74701e-16
PRDM6	3.8564e-20	0.286071	0.434	0.256	7.26314e-16
NBEA	4.75904e-20	0.382128	0.684	0.625	8.96318e-16
PRKG1	5.25237e-20	0.272938	0.418	0.254	9.89232e-16
LZIC	7.93501e-20	0.270131	0.42	0.258	1.49448e-15
KIDINS220	9.79416e-20	0.323717	0.776	0.787	1.84463e-15
AK1	1.55376e-19	0.270748	0.621	0.505	2.92636e-15
ROGDI	1.58638e-19	0.260288	0.506	0.363	2.98778e-15
NDUFB10	1.88698e-19	0.263602	0.801	0.76	3.55393e-15
DST	2.17693e-19	0.41736	0.727	0.733	4.10004e-15
EPB41L3	2.21577e-19	0.298935	0.758	0.685	4.17318e-15
CLK1	2.57826e-19	0.280418	0.561	0.439	4.8559e-15
SH3RF2	2.75601e-19	0.275645	0.427	0.261	5.19066e-15
CES2	4.76639e-19	0.300953	0.612	0.518	8.97702e-15
PMEPA1	4.84853e-19	0.280526	0.411	0.238	9.13173e-15
FAM162A	4.86605e-19	0.349355	0.739	0.701	9.16473e-15
TMEM41A	7.58579e-19	0.283958	0.57	0.457	1.42871e-14
TIPARP	8.64296e-19	0.275035	0.647	0.499	1.62782e-14
ANK2	9.43152e-19	0.269592	0.552	0.399	1.77633e-14
EFR3A	1.20886e-18	0.29218	0.626	0.53	2.27678e-14
ASAP1	1.22523e-18	0.282257	0.711	0.655	2.30761e-14
KLHDC8B	1.25353e-18	0.261177	0.55	0.409	2.3609e-14
ZNF302	1.27633e-18	0.255343	0.52	0.381	2.40384e-14
C14orf159	1.6148e-18	0.282206	0.54	0.409	3.04132e-14
B3GALNT1	2.4233e-18	0.291837	0.547	0.404	4.56405e-14
JAK1	2.59112e-18	0.289796	0.626	0.517	4.88011e-14
SORT1	4.67214e-18	0.287321	0.716	0.653	8.79951e-14
DENND5B	4.91124e-18	0.280476	0.681	0.572	9.24983e-14
SEMA3A	5.983e-18	0.310694	0.649	0.518	1.12684e-13
NDUFB9	7.3073e-18	0.253368	0.873	0.906	1.37626e-13
NDUFB3	7.53082e-18	0.295408	0.758	0.719	1.41836e-13
CALCOCO1	8.44236e-18	0.284465	0.584	0.453	1.59003e-13
CXXC4	1.1715e-17	0.269472	0.538	0.39	2.2064e-13
ERCC-00095	1.70186e-17	0.39355	0.635	0.528	3.20528e-13
MRPS25	2.47379e-17	0.251968	0.587	0.485	4.65913e-13
ATP5I	2.78634e-17	0.307987	0.758	0.731	5.24779e-13
RAB21	4.41759e-17	0.266592	0.6	0.511	8.32009e-13
COL18A1	6.47657e-17	0.258499	0.845	0.834	1.2198e-12
HIGD2A	9.84499e-17	0.286405	0.764	0.773	1.8542e-12
PLEKHA5	1.07157e-16	0.305489	0.709	0.679	2.01819e-12
NDN	1.38202e-16	0.253505	0.748	0.706	2.60289e-12
SCOC	1.73947e-16	0.265299	0.737	0.73	3.27612e-12
PSME1	2.72202e-16	0.258183	0.711	0.693	5.12666e-12
STT3B	2.91011e-16	0.331398	0.547	0.461	5.48089e-12
TNRC6B	4.79198e-16	0.25693	0.788	0.811	9.02522e-12
BMP2	7.21054e-16	0.267702	0.737	0.579	1.35803e-11
HDAC5	9.5115e-16	0.286232	0.628	0.552	1.7914e-11
NDUFS2	1.36745e-15	0.274167	0.808	0.853	2.57545e-11
LMO4	1.59513e-15	0.318763	0.799	0.803	3.00427e-11
ZNF608	2.05755e-15	0.251918	0.67	0.57	3.87519e-11
ECI1	3.60374e-15	0.267504	0.691	0.665	6.78728e-11
SLK	5.70355e-15	0.284117	0.603	0.536	1.07421e-10
RCAN2	7.30088e-15	0.344891	0.473	0.344	1.37505e-10
SLC30A3	8.85598e-15	0.284304	0.552	0.425	1.66794e-10
ITGB5	9.46563e-15	0.306607	0.677	0.606	1.78276e-10
KIAA0232	1.01286e-14	0.273879	0.667	0.631	1.90762e-10
PNISR	1.30221e-14	0.263821	0.834	0.904	2.45258e-10
PPP2R3A	1.48658e-14	0.26659	0.718	0.687	2.79982e-10
SLC25A37	1.68708e-14	0.251882	0.51	0.402	3.17745e-10
TMEM106B	1.74445e-14	0.266325	0.753	0.801	3.28551e-10
ALKBH5	2.85569e-14	0.272844	0.753	0.769	5.3784e-10
CDC14B	3.39233e-14	0.257772	0.621	0.554	6.38911e-10
RNF8	5.31059e-14	0.295433	0.543	0.463	1.0002e-09
ZKSCAN1	5.35264e-14	0.288016	0.674	0.623	1.00812e-09
RAB3IP	5.38537e-14	0.274056	0.704	0.651	1.01428e-09
ATPIF1	8.76202e-14	0.281874	0.85	0.896	1.65024e-09
NGRN	1.42872e-13	0.259333	0.785	0.824	2.69086e-09
ERCC-00162	2.51321e-13	0.345123	0.529	0.427	4.73337e-09
NDUFB1	1.11793e-12	0.297495	0.658	0.635	2.10551e-08
STK39	1.31893e-12	0.296063	0.619	0.561	2.48407e-08
ERCC-00044	3.92774e-12	0.300456	0.448	0.329	7.3975e-08
ALDOC	5.45859e-12	0.31035	0.494	0.407	1.02807e-07
EPS15	5.53858e-12	0.2561	0.711	0.709	1.04314e-07
RASSF8	1.28818e-11	0.254571	0.559	0.49	2.42615e-07
ASH1L	1.54396e-11	0.265455	0.644	0.644	2.90789e-07
TRPM7	1.7097e-11	0.259088	0.603	0.574	3.22005e-07
ZNF83	2.00775e-11	0.292193	0.753	0.741	3.7814e-07
VCAN	5.99399e-11	0.262155	0.91	0.92	1.12891e-06
OBSL1	6.19069e-11	0.254957	0.769	0.785	1.16595e-06
ERCC-00035	1.77617e-10	0.312788	0.427	0.331	3.34525e-06
ERCC-00079	4.83428e-10	0.280279	0.339	0.232	9.10489e-06
ANKRD26	6.99101e-10	0.260888	0.612	0.56	1.31669e-05
ANKRD10	9.08662e-10	0.255017	0.561	0.539	1.71137e-05
SERPINF1	1.14361e-09	0.324184	0.564	0.512	2.15387e-05
PCDH7	1.81464e-09	0.330879	0.794	0.752	3.4177e-05
ERCC-00131	2.34091e-09	0.28094	0.423	0.327	4.40887e-05
ERCC-00071	2.54853e-08	0.27282	0.374	0.282	0.00047999
SLC22A17	9.74322e-08	0.320256	0.61	0.609	0.00183504
PIP4K2A	2.74456e-06	0.256991	0.61	0.598	0.0516911
ERCC-00062	0.000291971	0.25158	0.356	0.315	1
XPO4	0.123902	0.259033	0.527	0.612	1

## Sheet: cluster D19_2
	p_val	avg_logFC	pct.1	pct.2	p_val_adj
VCAM1	6.15733e-200	0.668792	0.607	0.023	1.15967e-195		as shown in Figure 4
NKX2-5	5.35881e-164	1.15725	0.975	0.12	1.00928e-159
LRRC10	3.41601e-152	0.99604	0.844	0.09	6.4337e-148
MB	1.13917e-146	1.86243	0.992	0.152	2.14552e-142
HAMP	9.25046e-144	1.0066	0.615	0.042	1.74223e-139
CPNE5	8.572e-127	0.723609	0.738	0.081	1.61445e-122
PGM5	9.54421e-111	0.544172	0.754	0.099	1.79756e-106
PPP1R14C	1.26569e-107	0.76086	0.893	0.155	2.3838e-103
MYL3	1.17538e-105	1.8041	0.992	0.247	2.21371e-101
MYH7B	9.78898e-105	0.596771	0.77	0.105	1.84366e-100
CACNA1C	8.59328e-103	0.710741	0.877	0.165	1.61846e-98
CLIC5	8.71573e-101	0.565358	0.721	0.096	1.64152e-96
CKM	1.01454e-99	1.56088	1	0.248	1.91078e-95
HSPB2	6.90411e-95	0.750185	0.795	0.136	1.30032e-90
RRAD	1.0186e-94	0.918626	0.902	0.164	1.91842e-90
TRIM63	1.78683e-93	0.320944	0.516	0.048	3.36531e-89
KLHL41	6.56032e-91	0.870933	0.959	0.195	1.23557e-86
HSPB7	1.39549e-89	1.62612	1	0.334	2.62827e-85
MYBPC3	1.37404e-88	1.36299	0.992	0.279	2.58787e-84
IRX4	5.11198e-87	0.359358	0.246	0.008	9.62791e-83
MLIP	6.24581e-87	0.649463	0.828	0.156	1.17634e-82
TCEA3	1.19751e-86	0.704034	0.852	0.16	2.25539e-82
LDB3	1.93258e-84	1.52354	1	0.34	3.63982e-80
PLCXD3	2.16823e-82	0.484306	0.59	0.076	4.08364e-78
HSPB3	1.32903e-81	0.642318	0.877	0.168	2.5031e-77
FITM1	6.93366e-81	0.775231	0.926	0.204	1.30589e-76
APOBEC2	6.93573e-81	0.599401	0.844	0.16	1.30628e-76
AKAP6	4.73083e-79	0.544474	0.648	0.101	8.91005e-75
SPHKAP	3.15296e-78	0.835802	0.91	0.198	5.93829e-74
MTUS1	4.64561e-78	0.804578	0.861	0.203	8.74954e-74
TMOD1	1.31817e-76	0.711166	0.869	0.215	2.48264e-72
PDE4DIP	1.70884e-76	0.947028	0.951	0.328	3.21844e-72
ADPRHL1	1.88809e-74	0.876378	0.951	0.246	3.55603e-70
MTUS2	4.14711e-74	0.755402	0.861	0.217	7.81066e-70
INAFM2	5.76201e-74	0.3969	0.467	0.051	1.08522e-69
SRL	5.36262e-73	0.470318	0.615	0.094	1.01e-68
RSPO3	7.77653e-73	0.866193	0.59	0.088	1.46463e-68
TMEM163	6.11174e-72	0.271715	0.385	0.034	1.15109e-67
FBXO40	7.3605e-71	0.290301	0.459	0.051	1.38628e-66
TCAF1	1.53507e-70	0.731298	0.639	0.1	2.89116e-66
FHL2	1.89833e-70	1.30907	0.959	0.403	3.57531e-66
FAM189A2	7.36633e-70	0.871136	0.844	0.222	1.38737e-65
CSRP3	1.04792e-69	1.11111	0.984	0.296	1.97366e-65
NREP	2.11632e-69	1.33146	1	0.963	3.98588e-65
FAR2P2	2.64079e-69	0.33001	0.418	0.042	4.97366e-65
CORIN	5.35823e-69	0.806816	0.795	0.183	1.00917e-64
MYH6	1.28061e-68	1.60213	0.984	0.355	2.41191e-64
ERBB4	1.94436e-68	0.812006	0.918	0.295	3.66201e-64
LOC729348	4.00412e-68	0.564725	0.582	0.088	7.54136e-64
NPPA	7.09588e-68	2.14064	0.754	0.19	1.33644e-63
LAMA2	8.60197e-68	0.835931	0.902	0.27	1.6201e-63
TXLNB	9.1384e-68	0.339399	0.418	0.044	1.72113e-63
TNNC1	3.87862e-67	1.37637	1	0.476	7.30498e-63
EEF1A2	6.17807e-67	0.898004	0.959	0.32	1.16358e-62
BVES	2.91159e-66	1.01688	0.91	0.336	5.48369e-62
CTNNA3	9.38518e-65	0.457945	0.566	0.092	1.7676e-60
CAV1	1.87537e-64	0.844821	0.779	0.196	3.53208e-60
LRRC75A-AS1	5.29915e-64	0.951286	0.656	0.124	9.98043e-60
SORBS2	5.44823e-64	1.3033	1	0.504	1.02612e-59
CRIP2	7.94812e-64	1.10472	0.992	0.473	1.49695e-59
TGM2	6.50083e-63	0.697098	0.762	0.186	1.22437e-58
LINC00504	6.84245e-63	0.677207	0.607	0.101	1.28871e-58
TRDN	8.13952e-63	1.02268	0.984	0.371	1.533e-58
ITGB1BP2	1.23869e-62	0.565368	0.811	0.2	2.33294e-58
FHOD3	2.19324e-62	0.766958	0.918	0.323	4.13075e-58
MRPL57	3.77487e-62	0.478803	0.574	0.091	7.10959e-58
RXRG	1.25885e-61	0.365329	0.566	0.093	2.37091e-57
PPP1R3C	2.7614e-61	0.738492	0.844	0.25	5.20082e-57
ACTN2	3.67366e-61	1.19764	1	0.415	6.91897e-57
POPDC3	9.25034e-61	0.834929	0.902	0.339	1.74221e-56
AHNAK2	1.06772e-60	0.479341	0.475	0.07	2.01095e-56
MYOM1	1.53995e-60	0.922701	0.984	0.304	2.90034e-56
RPS17	2.22222e-60	0.910919	0.664	0.128	4.18532e-56
RACK1	2.51512e-60	1.29483	0.664	0.134	4.73698e-56
TNNI1	2.61571e-60	1.22131	1	0.672	4.92643e-56
MYL2	4.9616e-60	0.297526	0.164	0.005	9.34467e-56
FAM78A	5.93862e-60	0.618287	0.803	0.218	1.11848e-55
MYH7	1.3891e-59	1.7072	0.68	0.152	2.61623e-55
TIMP3	3.60587e-59	0.865787	0.902	0.299	6.79129e-55
HACD1	4.30773e-59	0.573074	0.574	0.097	8.11318e-55
SLC8A1	2.24711e-58	1.1312	1	0.441	4.2322e-54
MYOZ2	3.36143e-58	0.903014	0.975	0.337	6.33092e-54
PRSS35	6.73838e-58	0.674582	0.828	0.267	1.26911e-53
HAND2-AS1	1.31666e-57	0.541307	0.508	0.079	2.47979e-53
ENO3	1.89167e-57	0.895137	0.951	0.432	3.56277e-53
RYR2	6.14119e-57	1.02771	1	0.528	1.15663e-52
LINC01578	7.67331e-57	0.422018	0.574	0.097	1.44519e-52
CRYAB	1.16976e-56	0.82703	0.984	0.356	2.20312e-52
PWARSN	3.76252e-56	0.345077	0.459	0.064	7.08634e-52
ZFAS1	1.07823e-55	0.567784	0.59	0.105	2.03074e-51
NPTN-IT1	3.50909e-55	0.528657	0.516	0.083	6.60902e-51
LMOD2	1.01767e-54	0.770016	0.492	0.081	1.91668e-50
MAN1C1	1.44467e-54	0.457603	0.631	0.139	2.72089e-50
TNNT2	1.49144e-54	1.31153	1	0.674	2.80899e-50
NEBL	2.04159e-54	1.22756	1	0.698	3.84513e-50
SRPRA	3.13853e-54	0.393693	0.508	0.08	5.91111e-50
HNRNPDL	5.68369e-54	0.800265	0.631	0.124	1.07047e-49
MYO18B	6.65096e-54	0.570927	0.787	0.225	1.25264e-49
TMEM173	8.28334e-54	0.40051	0.639	0.131	1.56008e-49
TOMM70	1.06066e-53	0.366563	0.492	0.076	1.99765e-49
A2M	1.11068e-53	0.803739	0.639	0.133	2.09185e-49
CACNB2	2.78487e-53	0.533482	0.836	0.239	5.24502e-49
CADPS	2.87983e-53	0.509685	0.754	0.198	5.42387e-49
SARAF	1.11825e-52	0.369809	0.623	0.113	2.10611e-48
LINC01000	2.02004e-52	0.3798	0.508	0.082	3.80454e-48
MIR133A1HG	2.51968e-52	0.321845	0.385	0.047	4.74557e-48
DPF3	3.43822e-52	0.378567	0.525	0.089	6.47554e-48
HACD3	3.66749e-52	0.404569	0.549	0.096	6.90736e-48
LAMA4	6.36235e-52	0.427376	0.377	0.048	1.19829e-47
SNU13	8.76439e-52	0.539101	0.574	0.108	1.65068e-47
LGALS3	1.16926e-51	0.538496	0.615	0.142	2.20219e-47
MYL4	1.42361e-51	1.12123	1	0.605	2.68123e-47
CRIP1	1.55015e-51	0.559116	0.738	0.205	2.91956e-47
SC5D	2.34247e-51	0.495123	0.492	0.08	4.41181e-47
SMDT1	2.51442e-51	0.266101	0.467	0.07	4.73566e-47
LINC00342	2.82859e-51	0.37358	0.41	0.057	5.32737e-47
ADAM11	4.73378e-51	0.399763	0.672	0.163	8.9156e-47
NORAD	5.40393e-51	0.488161	0.623	0.119	1.01778e-46
WNK2	6.36874e-51	0.484073	0.746	0.22	1.19949e-46
TRIM55	7.09343e-51	0.728673	0.885	0.339	1.33598e-46
CKMT2	1.06885e-50	0.303646	0.492	0.082	2.01307e-46
CAMK2B	1.30864e-50	0.272034	0.418	0.06	2.46469e-46
CFAP20	2.28498e-50	0.380942	0.516	0.088	4.30352e-46
BEX3	2.8552e-50	0.852171	0.672	0.136	5.37749e-46
RCAN2	3.40738e-50	0.697029	0.869	0.341	6.41745e-46
LOC101928103	8.15146e-50	0.407604	0.533	0.095	1.53525e-45
GATA6-AS1	1.45818e-49	0.337428	0.492	0.08	2.74634e-45
ERBIN	2.80455e-49	0.402558	0.508	0.088	5.2821e-45
RNA45S5	2.80592e-49	0.63076	0.516	0.092	5.28467e-45
SMIM19	5.16523e-49	0.353729	0.484	0.08	9.72819e-45
NEXN	5.24961e-49	0.973788	0.951	0.601	9.88712e-45
DMD	1.01808e-48	0.716273	0.91	0.363	1.91746e-44
PLN	1.28692e-48	1.04951	0.992	0.534	2.42378e-44
MYL7	1.43655e-48	1.28955	1	0.764	2.70561e-44
YBX3	1.84575e-48	0.279119	0.451	0.07	3.47628e-44
SMIM10L1	2.7275e-48	0.303568	0.475	0.077	5.13697e-44
KMT5B	2.81581e-48	0.344055	0.467	0.076	5.3033e-44
HIPK3	4.75341e-48	0.794315	0.828	0.303	8.95257e-44
NRDC	9.19167e-48	0.455372	0.541	0.101	1.73116e-43
LINC00998	1.68514e-47	0.382227	0.533	0.098	3.17379e-43
RASSF5	2.062e-47	0.492667	0.762	0.211	3.88356e-43
TRH	2.75743e-47	0.703241	0.877	0.281	5.19335e-43
ADM	3.40368e-47	0.672737	0.689	0.2	6.41049e-43
XIRP1	4.27675e-47	0.786936	0.918	0.366	8.05483e-43
ZNF667-AS1	5.51356e-47	0.270087	0.402	0.058	1.03842e-42
TCEAL9	6.11231e-47	0.462704	0.533	0.1	1.15119e-42
TSPAN9	9.93735e-47	0.52584	0.746	0.249	1.8716e-42
FABP3	1.79331e-46	0.608588	0.869	0.331	3.37751e-42
NELFE	2.5501e-46	0.294425	0.451	0.073	4.80285e-42
VSTM2L	3.56835e-46	0.30455	0.484	0.089	6.72063e-42
COX6A2	5.34641e-46	0.260072	0.434	0.069	1.00694e-41
SMYD1	5.55725e-46	0.778503	0.943	0.453	1.04665e-41
DOK4	7.96641e-46	1.00156	0.992	0.535	1.50039e-41
TTN	9.97048e-46	1.2198	1	0.809	1.87784e-41
LINC00997	1.01757e-45	0.36021	0.508	0.091	1.9165e-41
GPRIN3	1.40852e-45	0.273082	0.467	0.082	2.65281e-41
PGAM2	1.52278e-45	0.27852	0.525	0.102	2.86801e-41
SF3B6	1.63516e-45	0.318929	0.5	0.09	3.07967e-41
ZNF106	2.73549e-45	0.427526	0.484	0.088	5.15203e-41
CNOT11	6.40572e-45	0.316949	0.393	0.059	1.20645e-40
BMT2	8.40463e-45	0.295654	0.402	0.061	1.58293e-40
ZFP36L1	1.11482e-44	0.863599	1	0.948	2.09966e-40
UNC45B	1.16941e-44	0.614236	0.934	0.328	2.20247e-40
TCAP	1.18797e-44	0.309612	0.475	0.087	2.23742e-40
MTURN	1.3539e-44	0.311589	0.377	0.054	2.54994e-40
CORO6	1.43347e-44	0.550569	0.828	0.287	2.6998e-40
SMPX	2.84309e-44	0.657161	0.918	0.299	5.35468e-40
SLC25A4	8.00822e-44	0.842494	0.992	0.731	1.50827e-39
MITF	1.09882e-43	0.647991	0.852	0.328	2.06951e-39
COL18A1	1.15215e-43	0.827295	0.992	0.83	2.16997e-39
SLIT3	1.63705e-43	0.730153	0.869	0.353	3.08323e-39
KMT2C	1.65965e-43	0.377499	0.475	0.088	3.12578e-39
PPARGC1A	4.61988e-43	0.48948	0.762	0.223	8.70107e-39
TRIM54	6.85717e-43	0.376762	0.607	0.152	1.29148e-38
ASPG	7.6672e-43	0.333164	0.508	0.107	1.44404e-38
LOC101929486	8.16742e-43	0.346929	0.451	0.079	1.53825e-38
SYNPO2L	1.54705e-42	0.794123	0.893	0.337	2.91372e-38
ZAK	2.868e-42	0.756446	0.984	0.693	5.4016e-38
POPDC2	5.73076e-42	0.623616	0.934	0.333	1.07933e-37
KMT2A	5.86033e-42	0.332333	0.492	0.092	1.10373e-37
QKI	5.93866e-42	0.603658	1	0.952	1.11849e-37
RTCB	1.52539e-41	0.337123	0.475	0.089	2.87291e-37
HIST2H2BE	1.82394e-41	0.381253	0.615	0.153	3.43521e-37
ABLIM1	4.97911e-41	0.766378	0.984	0.692	9.37766e-37
RBM24	5.01087e-41	0.7441	0.959	0.598	9.43748e-37
FXYD1	5.88307e-41	0.370915	0.656	0.187	1.10802e-36
PPP1R1A	7.87608e-41	0.784589	0.943	0.517	1.48338e-36
REEP1	8.24814e-41	0.418298	0.73	0.22	1.55346e-36
LOC101926889	8.61331e-41	0.303459	0.41	0.07	1.62223e-36
MICU2	1.20846e-40	0.271651	0.443	0.078	2.27602e-36
FAM134B	2.06125e-40	0.385099	0.574	0.146	3.88215e-36
NFIC	2.44795e-40	0.580982	0.926	0.467	4.61046e-36
CNIH1	4.94076e-40	0.415011	0.475	0.092	9.30542e-36
LOC55338	6.38109e-40	0.348762	0.443	0.082	1.20181e-35
PLXNA4	8.04091e-40	0.327645	0.475	0.099	1.51442e-35
SIPA1L2	1.14152e-39	0.758623	0.951	0.594	2.14994e-35
PRKAR2A	1.18529e-39	0.512283	0.607	0.166	2.23238e-35
RBM38	1.18781e-39	0.720394	0.918	0.571	2.23712e-35
MT-ND3	1.2207e-39	0.471661	1	1	2.29906e-35
SGCA	2.05645e-39	0.433106	0.697	0.218	3.87313e-35
C4orf32	2.24666e-39	0.266837	0.451	0.092	4.23136e-35
TESC	4.00469e-39	0.317159	0.639	0.173	7.54243e-35
KMT2E	5.86191e-39	0.397523	0.492	0.101	1.10403e-34
CYFIP2	5.90056e-39	0.713763	0.844	0.438	1.11131e-34
DKK3	6.80215e-39	0.694776	0.918	0.572	1.28112e-34
PTGES3L	7.90802e-39	0.353735	0.721	0.237	1.4894e-34
WAPL	1.44995e-38	0.263529	0.385	0.064	2.73083e-34
NCAM1	1.79791e-38	0.674245	0.967	0.581	3.38618e-34
TMEM261	2.86035e-38	0.300237	0.516	0.107	5.38719e-34
PRKAG2	5.13405e-38	0.494522	0.836	0.35	9.66946e-34
MIEF1	8.45571e-38	0.282129	0.41	0.073	1.59255e-33
ICA1	8.89739e-38	0.392445	0.738	0.268	1.67573e-33
C11orf72	1.05388e-37	0.283592	0.418	0.077	1.98489e-33
MDH1	1.15948e-37	0.629307	1	0.939	2.18377e-33
SNTA1	1.34298e-37	0.569423	0.877	0.428	2.52937e-33
ADGRL2	2.51381e-37	0.317328	0.443	0.085	4.73451e-33
RCSD1	3.70051e-37	0.555003	0.861	0.357	6.96955e-33
NECTIN3	3.91755e-37	0.259552	0.328	0.05	7.37831e-33
SLF2	4.8559e-37	0.291199	0.385	0.068	9.1456e-33
ADAMTS19	9.66759e-37	0.58289	0.721	0.291	1.82079e-32
EDNRA	2.67365e-36	0.619791	0.959	0.52	5.03555e-32
ASB2	3.55439e-36	0.327508	0.607	0.156	6.69434e-32
POSTN	9.35289e-36	0.417487	0.369	0.066	1.76152e-31
MYOCD	1.17467e-35	0.516108	0.869	0.352	2.21238e-31
LINC00888	1.31627e-35	0.281433	0.369	0.063	2.47907e-31
IGFBP5	1.97471e-35	0.602354	0.918	0.431	3.71917e-31
FLJ44635	4.5414e-35	0.344832	0.533	0.131	8.55327e-31
HADHB	4.95951e-35	0.650654	0.951	0.776	9.34074e-31
MT-ND1	5.51779e-35	0.378857	1	1	1.03922e-30
SVIL	7.04791e-35	0.656714	0.943	0.629	1.3274e-30
FBXO32	8.75288e-35	0.447953	0.664	0.197	1.64852e-30
LOC101928433	1.01636e-34	0.265166	0.303	0.045	1.91421e-30
KIF26B	1.11982e-34	0.496399	0.77	0.327	2.10906e-30
HRC	1.30669e-34	0.330215	0.762	0.251	2.46101e-30
C20orf166-AS1	1.48829e-34	0.551696	0.779	0.313	2.80304e-30
GPI	1.79203e-34	0.527973	0.992	0.897	3.37511e-30
SHD	2.69348e-34	0.401219	0.73	0.234	5.07289e-30
CAV2	3.53327e-34	0.609213	0.861	0.421	6.65455e-30
PARM1	3.95458e-34	0.425427	0.598	0.184	7.44806e-30
PPP1R13B	5.12219e-34	0.307472	0.607	0.178	9.64712e-30
ALDOA	1.09845e-33	0.568662	1	0.96	2.06883e-29
GAS6	1.47015e-33	0.402373	0.738	0.281	2.76888e-29
TBX5	1.47507e-33	0.601661	0.959	0.492	2.77815e-29
CCDC69	2.10539e-33	0.384579	0.68	0.235	3.96529e-29
FILIP1	3.21145e-33	0.633844	0.861	0.437	6.04845e-29
PALM2	4.38854e-33	0.495553	0.754	0.303	8.26538e-29
KCNH2	4.73557e-33	0.450422	0.721	0.284	8.91898e-29
HAND2	5.31703e-33	0.63782	0.967	0.562	1.00141e-28
TECRL	5.78634e-33	0.715604	1	0.602	1.0898e-28
HSPB1	8.7626e-33	0.638676	1	0.976	1.65035e-28
MTSS1	9.58427e-33	0.402378	0.664	0.233	1.8051e-28
OBSCN	1.12166e-32	0.420255	0.73	0.302	2.11253e-28
CACNA1D	1.58786e-32	0.287965	0.557	0.145	2.99058e-28
ABAT	2.11578e-32	0.404219	0.582	0.182	3.98485e-28
RAB9B	2.15256e-32	0.28983	0.516	0.139	4.05414e-28
ZBTB20	2.42104e-32	0.425826	0.574	0.173	4.55978e-28
ADGRL1	1.02864e-31	0.266778	0.41	0.085	1.93734e-27
ATP2A2	1.25549e-31	0.642923	0.992	0.947	2.3646e-27
TMEM263	1.48022e-31	0.268983	0.426	0.09	2.78785e-27
RABGAP1L	1.63882e-31	0.589902	0.934	0.559	3.08655e-27
SLC20A2	1.96754e-31	0.46977	0.828	0.398	3.70566e-27
GJA3	2.01338e-31	0.255952	0.385	0.077	3.792e-27
PPP1R12B	2.71754e-31	0.656307	0.934	0.479	5.11821e-27
LDHA	3.12535e-31	0.678745	0.992	0.923	5.88628e-27
TSC22D1	4.31548e-31	0.62844	0.984	0.886	8.12777e-27
MBNL1	6.24529e-31	0.345002	0.68	0.256	1.17624e-26
ACTC1	1.23112e-30	0.687408	1	0.881	2.31869e-26
PDGFD	1.79033e-30	0.363863	0.516	0.148	3.3719e-26
TACC2	2.47516e-30	0.471673	0.795	0.409	4.66171e-26
ALPK2	3.22056e-30	0.594758	0.943	0.605	6.06561e-26
CMYA5	3.23192e-30	0.544845	0.951	0.481	6.087e-26
RHOQ	3.82781e-30	0.560885	0.926	0.723	7.20929e-26
GOLGA8A	6.6889e-30	0.507111	0.738	0.337	1.25979e-25
MSX2	7.15559e-30	0.483416	0.574	0.197	1.34768e-25
MSRB3	7.3667e-30	0.555661	0.869	0.455	1.38744e-25
SPEG	1.39451e-29	0.576401	0.852	0.495	2.62642e-25
MEF2A	1.87481e-29	0.558106	0.951	0.674	3.53102e-25
ARL6IP5	2.02611e-29	0.551174	0.959	0.843	3.81597e-25
PDLIM5	4.43201e-29	0.68204	1	0.878	8.34725e-25
GPC1	5.07248e-29	0.472908	0.844	0.494	9.55351e-25
SLC25A12	5.54146e-29	0.396807	0.811	0.383	1.04368e-24
MICAL3	5.66835e-29	0.397817	0.746	0.336	1.06758e-24
TNFRSF19	6.45186e-29	0.582835	0.721	0.3	1.21514e-24
FER	7.16288e-29	0.331845	0.607	0.208	1.34906e-24
LIMS2	8.94756e-29	0.333534	0.648	0.222	1.68518e-24
PSD3	1.45804e-28	0.500207	0.861	0.501	2.74607e-24
NDRG2	1.60514e-28	0.398916	0.795	0.365	3.02313e-24
MXRA7	1.66521e-28	0.540484	0.992	0.837	3.13626e-24
MSI2	1.89927e-28	0.448666	0.59	0.205	3.57708e-24
BMP2	2.98878e-28	1.32497	0.902	0.589	5.62907e-24
SPON1	3.65114e-28	0.514405	0.73	0.304	6.87656e-24
HCN4	4.12185e-28	0.558783	0.951	0.5	7.7631e-24
CIRBP	6.49517e-28	0.476965	1	0.908	1.2233e-23
CASZ1	1.00913e-27	0.352121	0.746	0.295	1.90059e-23
COL4A2	1.43109e-27	0.496368	0.992	0.817	2.69531e-23
CAPN3	1.58132e-27	0.308257	0.574	0.168	2.97826e-23
CBX6	2.19949e-27	0.392474	0.861	0.491	4.14251e-23
PROX1	2.25399e-27	0.343642	0.689	0.274	4.24517e-23
ANKH	2.38547e-27	0.327689	0.525	0.17	4.49279e-23
TNK2	2.50434e-27	0.430114	0.672	0.298	4.71667e-23
AFAP1L1	2.93959e-27	0.322356	0.615	0.221	5.53643e-23
ATP1A2	3.54843e-27	0.427275	0.689	0.289	6.68311e-23
RBPMS2	7.00598e-27	0.467957	0.984	0.874	1.31951e-22
LMO7	7.02753e-27	0.458315	0.779	0.336	1.32356e-22
STARD4	7.03479e-27	0.516787	0.574	0.22	1.32493e-22
TOM1L2	9.40384e-27	0.335992	0.762	0.335	1.77112e-22
SLC1A4	1.32151e-26	0.28277	0.377	0.091	2.48892e-22
COX20	1.38483e-26	0.343447	0.631	0.232	2.60819e-22
EIF1B	1.48428e-26	0.578504	0.943	0.857	2.79549e-22
GOLIM4	1.69183e-26	0.473344	0.828	0.439	3.18639e-22
LMO4	2.20878e-26	0.606188	0.951	0.796	4.16001e-22
MYL9	2.80931e-26	0.586687	1	0.946	5.29105e-22
PRNP	3.2595e-26	0.428587	0.713	0.34	6.13894e-22
FEM1B	4.46792e-26	0.370726	0.582	0.203	8.41487e-22
RNF207	5.68979e-26	0.366868	0.656	0.258	1.07161e-21
FIGN	6.05346e-26	0.496004	0.705	0.337	1.14011e-21
CDH2	6.38508e-26	0.481643	0.992	0.767	1.20257e-21
SAMD4A	7.03521e-26	0.386447	0.77	0.341	1.32501e-21
HDAC9	7.5802e-26	0.306457	0.68	0.259	1.42765e-21
RNF217	7.62784e-26	0.309627	0.525	0.174	1.43663e-21
SYNGR2	1.00011e-25	0.335152	0.73	0.358	1.88361e-21
NEAT1	1.7132e-25	0.713083	0.73	0.375	3.22664e-21
SLC30A3	1.96943e-25	0.468218	0.811	0.427	3.70922e-21
NNT	1.98551e-25	0.462356	0.869	0.574	3.7395e-21
ZNF385B	2.9276e-25	0.299787	0.623	0.216	5.51384e-21
MT-CYB	3.06135e-25	0.313976	1	1	5.76574e-21
PDK1	3.64746e-25	0.489803	0.959	0.708	6.86963e-21
BZW2	5.17778e-25	0.488219	0.951	0.789	9.75183e-21
TNRC18	7.11912e-25	0.359049	0.754	0.373	1.34081e-20
ATP1B2	1.11673e-24	0.431611	0.992	0.68	2.10324e-20
MOAP1	1.18905e-24	0.323645	0.73	0.345	2.23946e-20
SDHA	1.51579e-24	0.29585	0.68	0.307	2.85484e-20
GNG11	1.88239e-24	0.326021	0.533	0.185	3.5453e-20
TSPAN2	2.24315e-24	0.3457	0.877	0.413	4.22475e-20
DGKH	3.41763e-24	0.254795	0.402	0.109	6.43676e-20
SYNE1	3.69945e-24	0.345937	0.73	0.328	6.96755e-20
EPHA7	3.92466e-24	0.36016	0.623	0.244	7.3917e-20
ZNF436	4.16101e-24	0.351	0.566	0.218	7.83685e-20
ATP1B1	8.25449e-24	0.556945	0.926	0.65	1.55465e-19
ERCC-00096	9.28712e-24	0.377775	1	0.999	1.74914e-19
CITED4	9.87352e-24	0.498686	0.811	0.484	1.85958e-19
MDH2	1.17952e-23	0.413908	0.951	0.864	2.22151e-19
FBN2	1.30077e-23	0.618045	0.959	0.769	2.44987e-19
ERCC-00130	2.09565e-23	0.363956	1	1	3.94695e-19
PROS1	2.52643e-23	0.410933	0.738	0.382	4.75829e-19
S1PR1	2.82309e-23	0.323966	0.525	0.192	5.31701e-19
CHCHD10	2.92393e-23	0.402862	0.951	0.815	5.50693e-19
PMEPA1	3.27477e-23	0.3811	0.615	0.248	6.1677e-19
BTG1	9.22703e-23	0.419436	0.951	0.693	1.73782e-18
MAGI2-AS3	1.0504e-22	0.343075	0.885	0.464	1.97832e-18
IDH3A	1.06212e-22	0.400619	0.721	0.383	2.0004e-18
LOC100506548	1.25556e-22	0.44184	0.885	0.682	2.36472e-18
SH3PXD2A	1.53521e-22	0.327061	0.746	0.388	2.89142e-18
ATXN1	1.62031e-22	0.381092	0.73	0.331	3.05169e-18
ERCC-00113	1.82896e-22	0.36346	1	0.987	3.44467e-18
CFL2	2.1695e-22	0.429722	0.967	0.762	4.08604e-18
TMEM245	3.17697e-22	0.440851	0.975	0.852	5.9835e-18
AGL	3.27707e-22	0.489389	0.828	0.611	6.17204e-18
SMARCD3	3.99562e-22	0.482819	0.82	0.501	7.52535e-18
VEGFC	4.09353e-22	0.267846	0.549	0.19	7.70975e-18
PPM1K	4.90831e-22	0.446621	0.828	0.517	9.2443e-18
LBH	6.44256e-22	0.494006	0.795	0.422	1.21339e-17
PALLD	6.84369e-22	0.404232	1	0.845	1.28894e-17
PLCB4	7.81989e-22	0.284648	0.705	0.313	1.4728e-17
ATP13A3	9.27974e-22	0.480579	0.918	0.762	1.74775e-17
ARHGAP26	1.81455e-21	0.365049	0.615	0.28	3.41753e-17
ATP5G3	2.2755e-21	0.315881	1	0.982	4.28568e-17
ABRA	2.4616e-21	0.251263	0.369	0.095	4.63618e-17
MT-RNR2	2.5151e-21	0.387388	1	1	4.73695e-17
BMP7	2.81824e-21	0.379255	0.697	0.338	5.30787e-17
MT-ND2	3.37143e-21	0.328884	1	1	6.34976e-17
JPH2	4.24727e-21	0.257091	0.574	0.226	7.99931e-17
USP2	4.28504e-21	0.294589	0.598	0.251	8.07044e-17
CS	4.61346e-21	0.378914	0.967	0.928	8.68899e-17
ANGPT1	4.85031e-21	0.331321	0.459	0.15	9.13507e-17
ADCY6	5.29451e-21	0.323145	0.73	0.364	9.97167e-17
BAMBI	7.4877e-21	0.560096	0.943	0.701	1.41023e-16
VEGFB	7.6244e-21	0.372075	0.861	0.622	1.43598e-16
TPM1	9.02459e-21	0.488049	1	0.989	1.69969e-16
TPD52L1	9.2755e-21	0.287683	0.541	0.216	1.74695e-16
PFKP	1.00578e-20	0.434111	0.959	0.781	1.89429e-16
PAM	1.28804e-20	0.585929	0.943	0.766	2.42589e-16
ATP2B4	1.45994e-20	0.455862	0.951	0.742	2.74965e-16
RNF115	1.65197e-20	0.40657	0.754	0.471	3.11132e-16
AK1	1.67111e-20	0.381969	0.82	0.509	3.14738e-16
KLHL21	1.80171e-20	0.385603	0.697	0.373	3.39334e-16
ASPH	2.15057e-20	0.402407	0.91	0.734	4.05038e-16
C4orf3	2.67871e-20	0.424969	0.951	0.813	5.04508e-16
XPR1	2.97322e-20	0.454144	0.893	0.68	5.59976e-16
USP28	3.11509e-20	0.402622	0.902	0.683	5.86696e-16
TBX2	3.16419e-20	0.41515	0.672	0.316	5.95943e-16
DUSP5	3.19391e-20	0.32746	0.656	0.298	6.01541e-16
SLC25A37	3.28351e-20	0.347724	0.713	0.405	6.18417e-16
SIRPA	3.38666e-20	0.323533	0.623	0.276	6.37843e-16
GOT1	3.47778e-20	0.423731	0.893	0.702	6.55006e-16
MRAS	3.61083e-20	0.400832	0.787	0.437	6.80064e-16
RBM20	4.65182e-20	0.42179	0.721	0.399	8.76124e-16
MGST3	6.59824e-20	0.378865	0.984	0.853	1.24271e-15
MYLK3	1.04771e-19	0.458445	0.779	0.454	1.97325e-15
CFLAR	1.27542e-19	0.43656	0.91	0.703	2.40213e-15
PYROXD2	1.33189e-19	0.259067	0.484	0.179	2.50849e-15
PPP1R3B	1.68609e-19	0.330787	0.68	0.352	3.17559e-15
B2M	1.81487e-19	0.417686	0.967	0.834	3.41813e-15
PTP4A3	4.44572e-19	0.314513	0.746	0.418	8.37308e-15
BMP5	4.63705e-19	0.391887	0.877	0.53	8.73341e-15
MMP15	4.66517e-19	0.350681	0.811	0.509	8.78639e-15
HIF3A	4.74743e-19	0.355369	0.852	0.556	8.9413e-15
EPM2AIP1	5.1121e-19	0.40114	0.943	0.778	9.62814e-15
TNNI3	5.35783e-19	0.503491	0.689	0.341	1.00909e-14
RIN2	8.83044e-19	0.366841	0.672	0.325	1.66313e-14
ALPK3	8.88172e-19	0.400199	0.869	0.602	1.67278e-14
IDH2	9.34639e-19	0.360965	0.943	0.757	1.7603e-14
MLLT6	1.06018e-18	0.332158	0.77	0.48	1.99675e-14
KLHL24	1.10157e-18	0.397318	0.852	0.577	2.07469e-14
PTPN21	1.18318e-18	0.38957	0.738	0.437	2.22839e-14
ACSL1	1.24545e-18	0.30416	0.5	0.199	2.34569e-14
PRKAA2	1.44372e-18	0.345218	0.795	0.501	2.7191e-14
SSPN	1.52319e-18	0.268373	0.59	0.245	2.86878e-14
PKP2	1.66855e-18	0.392203	0.967	0.682	3.14255e-14
NDUFA5	2.40735e-18	0.331012	0.951	0.787	4.53401e-14
ERCC-00002	2.58081e-18	0.286035	1	1	4.8607e-14
UNC5B	2.59999e-18	0.400815	0.959	0.72	4.89683e-14
KCNQ5	3.13414e-18	0.266203	0.541	0.228	5.90285e-14
NRTN	3.3745e-18	0.262917	0.549	0.229	6.35553e-14
PRICKLE1	4.12768e-18	0.424068	0.795	0.476	7.77407e-14
TMEM56	4.46833e-18	0.350294	0.607	0.308	8.41565e-14
GBAS	4.91441e-18	0.370016	0.91	0.803	9.25579e-14
MT-CO1	4.93425e-18	0.329003	1	1	9.29317e-14
DES	5.64716e-18	0.377585	0.525	0.201	1.06359e-13
ARHGAP31	8.15067e-18	0.297282	0.623	0.314	1.5351e-13
LRRC49	8.26571e-18	0.299217	0.475	0.199	1.55676e-13
FXYD6	1.08647e-17	0.433513	0.943	0.753	2.04626e-13
STAT3	1.32724e-17	0.32051	0.811	0.524	2.49972e-13
FAM162A	1.5013e-17	0.395799	0.869	0.7	2.82754e-13
TMED4	1.68357e-17	0.328749	0.574	0.26	3.17084e-13
ISOC1	1.81681e-17	0.46565	0.721	0.511	3.42177e-13
BMPR2	1.86268e-17	0.374954	0.82	0.552	3.50818e-13
LTBP1	2.07617e-17	0.333772	0.861	0.579	3.91026e-13
EMILIN2	3.4155e-17	0.344141	0.77	0.426	6.43274e-13
RBMS1	3.54228e-17	0.363474	0.951	0.82	6.67153e-13
MACF1	3.64144e-17	0.3754	0.975	0.877	6.85829e-13
COL2A1	4.05016e-17	0.385767	0.975	0.691	7.62807e-13
CBX4	4.32055e-17	0.289265	0.607	0.281	8.13732e-13
MXI1	5.00403e-17	0.338326	0.672	0.374	9.42459e-13
ERCC-00074	6.52287e-17	0.253954	1	1	1.22852e-12
PYGB	6.57131e-17	0.343931	0.787	0.53	1.23764e-12
MPC1	7.55934e-17	0.290759	0.77	0.455	1.42373e-12
SOD2	7.57756e-17	0.359287	0.844	0.647	1.42716e-12
ZNF704	7.91096e-17	0.339211	0.762	0.435	1.48995e-12
MLF1	8.75367e-17	0.33041	0.779	0.498	1.64867e-12
LRRC16A	1.1648e-16	0.286498	0.59	0.29	2.19378e-12
OBSL1	1.3819e-16	0.376637	0.926	0.777	2.60267e-12
COL7A1	1.43531e-16	0.257727	0.459	0.186	2.70327e-12
MALAT1	1.43626e-16	0.451388	1	0.978	2.70506e-12
ERCC-00003	1.46367e-16	0.264384	0.992	0.919	2.75668e-12
ERCC-00046	1.56091e-16	0.25139	1	0.998	2.93981e-12
HADHA	1.62555e-16	0.370304	0.951	0.865	3.06155e-12
SMAD7	1.63421e-16	0.268951	0.541	0.248	3.07787e-12
LAPTM4B	1.67902e-16	0.327283	1	0.959	3.16226e-12
NPTN	1.77872e-16	0.369568	0.967	0.831	3.35004e-12
ANK2	1.79794e-16	0.306924	0.705	0.408	3.38624e-12
FGF13	2.26749e-16	0.296797	0.648	0.361	4.27058e-12
RAB3IP	3.03485e-16	0.325594	0.869	0.65	5.71583e-12
ERCC-00171	3.69269e-16	0.262146	1	0.994	6.95481e-12
UBR3	3.78214e-16	0.313216	0.828	0.576	7.12328e-12
PLEKHA5	4.63774e-16	0.34308	0.885	0.675	8.73472e-12
LPCAT4	6.70834e-16	0.341599	0.672	0.431	1.26345e-11
WEE1	7.21983e-16	0.388077	0.926	0.816	1.35978e-11
XPO4	8.41302e-16	0.409767	0.811	0.592	1.58451e-11
WWTR1	1.00022e-15	0.280978	0.631	0.35	1.88382e-11
PITPNB	1.06328e-15	0.350103	0.902	0.729	2.00258e-11
TXNIP	1.12991e-15	0.380353	0.934	0.679	2.12808e-11
NEK7	1.23354e-15	0.310657	0.828	0.559	2.32326e-11
ZDHHC21	1.51191e-15	0.257292	0.672	0.377	2.84753e-11
ZNF827	1.63323e-15	0.342605	0.746	0.493	3.07602e-11
PKIA	1.75098e-15	0.32216	0.762	0.478	3.29779e-11
AES	1.77817e-15	0.325031	0.951	0.845	3.349e-11
PNRC1	1.80555e-15	0.335899	0.934	0.79	3.40058e-11
PHTF2	1.90401e-15	0.279183	0.77	0.487	3.58602e-11
INPP5A	1.97803e-15	0.312913	0.77	0.515	3.72543e-11
ERCC-00009	2.02446e-15	0.258901	0.984	0.927	3.81288e-11
COL4A6	3.35978e-15	0.258916	0.861	0.584	6.32781e-11
DVL3	4.02775e-15	0.306379	0.902	0.772	7.58586e-11
UQCRC2	4.22006e-15	0.281798	0.984	0.882	7.94805e-11
LRRFIP1	5.09714e-15	0.349709	0.902	0.786	9.59996e-11
COX5B	5.17605e-15	0.264936	0.967	0.92	9.74858e-11
ZFHX3	6.15251e-15	0.294579	0.779	0.473	1.15876e-10
PTPRK	7.11075e-15	0.312555	0.828	0.592	1.33924e-10
TOB1	7.32719e-15	0.327419	0.598	0.326	1.38e-10
MGAT5	7.33225e-15	0.303017	0.705	0.444	1.38096e-10
GRK5	7.42098e-15	0.274111	0.508	0.231	1.39767e-10
BAG1	8.75012e-15	0.263136	0.77	0.51	1.648e-10
PDK2	1.36009e-14	0.310483	0.754	0.488	2.56159e-10
C5orf24	1.39805e-14	0.33637	0.943	0.786	2.6331e-10
PPIC	1.42903e-14	0.298865	0.787	0.493	2.69143e-10
RRAGD	1.47407e-14	0.26954	0.705	0.397	2.77627e-10
C14orf159	1.5597e-14	0.291766	0.697	0.417	2.93753e-10
PTPRD	1.86803e-14	0.338307	0.975	0.776	3.51826e-10
WNK1	1.89094e-14	0.371775	0.926	0.878	3.5614e-10
RNPC3	2.07462e-14	0.341011	0.689	0.427	3.90733e-10
LRRFIP2	2.13247e-14	0.27982	0.73	0.486	4.01629e-10
GAB1	3.12044e-14	0.290682	0.738	0.492	5.87703e-10
PLCL2	4.66403e-14	0.271321	0.672	0.352	8.78423e-10
BAG3	6.01845e-14	0.267365	0.787	0.514	1.13351e-09
FAM127A	6.15883e-14	0.313813	0.951	0.859	1.15995e-09
SMAD9	7.53552e-14	0.354497	0.639	0.364	1.41924e-09
MTHFR	7.73238e-14	0.292683	0.607	0.352	1.45632e-09
LINC00674	7.73331e-14	0.289951	0.902	0.704	1.45649e-09
STK39	8.09531e-14	0.271503	0.82	0.559	1.52467e-09
VEGFA	9.78181e-14	0.334759	0.861	0.625	1.84231e-09
CAMK2D	1.11714e-13	0.287538	0.943	0.718	2.10401e-09
GSTK1	1.18383e-13	0.296288	0.811	0.596	2.22963e-09
PDHA1	1.22008e-13	0.305112	0.951	0.836	2.2979e-09
GYG1	1.25324e-13	0.350748	0.844	0.677	2.36035e-09
NAB1	1.4305e-13	0.286062	0.664	0.407	2.69421e-09
TAB2	1.44343e-13	0.376521	0.844	0.714	2.71857e-09
COX7B	1.59861e-13	0.252238	0.992	0.948	3.01083e-09
CPEB4	1.62768e-13	0.274153	0.803	0.551	3.06557e-09
FOXP1	1.63897e-13	0.284716	0.967	0.754	3.08683e-09
BEX4	1.71703e-13	0.285303	0.943	0.87	3.23386e-09
HK1	1.87379e-13	0.323528	0.934	0.8	3.52909e-09
CISD1	2.02646e-13	0.292184	0.852	0.66	3.81664e-09
TANC2	2.23852e-13	0.27699	0.631	0.355	4.21603e-09
MPPED2	2.34453e-13	0.265849	0.615	0.34	4.41569e-09
MATN2	2.63372e-13	0.252899	0.615	0.331	4.96035e-09
MFN2	3.41696e-13	0.260228	0.787	0.592	6.4355e-09
SPTBN1	4.57768e-13	0.284277	0.967	0.878	8.6216e-09
CUX1	4.79109e-13	0.294048	0.943	0.785	9.02355e-09
FBXO18	4.9342e-13	0.27233	0.803	0.606	9.29306e-09
FREM2	4.96915e-13	0.377246	0.73	0.492	9.3589e-09
AK3	5.03591e-13	0.307343	0.91	0.774	9.48463e-09
COL4A5	5.33606e-13	0.286722	0.984	0.754	1.00499e-08
TBX3	5.59388e-13	0.313446	0.5	0.235	1.05355e-08
DCAF6	9.48344e-13	0.296431	0.689	0.436	1.78611e-08
SOBP	9.68924e-13	0.26078	0.557	0.284	1.82487e-08
TBC1D4	1.00474e-12	0.27648	0.713	0.447	1.89233e-08
ITGA7	1.1515e-12	0.27475	0.557	0.297	2.16873e-08
ABCC5	1.18301e-12	0.282812	0.697	0.472	2.22809e-08
AFF1	1.27216e-12	0.309727	0.844	0.665	2.39598e-08
NAV1	1.75032e-12	0.564736	0.852	0.639	3.29656e-08
NGFR	1.80393e-12	0.291775	0.352	0.139	3.39752e-08
PGM1	1.95323e-12	0.266736	0.91	0.789	3.6787e-08
ERCC-00108	2.18486e-12	0.256511	0.984	0.904	4.11496e-08
TSC22D2	2.6665e-12	0.306265	0.68	0.424	5.02209e-08
VCAN	2.78241e-12	0.72074	0.975	0.916	5.24039e-08
GNAQ	3.19475e-12	0.317056	0.451	0.218	6.01699e-08
PNKD	3.66719e-12	0.257393	0.811	0.588	6.90679e-08
FBLIM1	3.94685e-12	0.26352	0.762	0.52	7.43349e-08
SCP2	5.00688e-12	0.264373	0.811	0.627	9.42996e-08
REEP3	5.23531e-12	0.280888	0.803	0.607	9.86019e-08
SLK	5.6997e-12	0.268542	0.754	0.536	1.07348e-07
PNISR	7.2566e-12	0.310473	0.959	0.891	1.36671e-07
PHF20L1	8.91747e-12	0.27756	0.885	0.694	1.67952e-07
EPS15	1.11124e-11	0.254739	0.885	0.702	2.09292e-07
NDUFB5	1.38003e-11	0.251937	0.951	0.885	2.59914e-07
SMAD6	1.85339e-11	0.363939	0.885	0.632	3.49067e-07
TIPARP	1.87534e-11	0.282814	0.762	0.51	3.53201e-07
MKRN1	3.84812e-11	0.285662	0.943	0.859	7.24755e-07
ACADVL	4.07711e-11	0.285378	0.877	0.734	7.67883e-07
MANBA	4.14089e-11	0.266331	0.648	0.418	7.79896e-07
PPP2R3A	4.9436e-11	0.301751	0.869	0.684	9.31077e-07
NR2F2	4.99626e-11	0.356353	0.844	0.564	9.40995e-07
LGALS3BP	5.07582e-11	0.250561	0.631	0.376	9.5598e-07
HSDL2	5.53934e-11	0.251122	0.803	0.601	1.04328e-06
TMEM67	7.3223e-11	0.255167	0.484	0.28	1.37908e-06
KTN1	1.16171e-10	0.253352	0.967	0.892	2.18796e-06
ZNF330	1.2355e-10	0.250932	0.713	0.509	2.32693e-06
KIDINS220	1.50441e-10	0.278931	0.91	0.781	2.83341e-06
ATP1A1	1.55161e-10	0.35503	0.959	0.855	2.92231e-06
ARHGAP5	1.61525e-10	0.26266	0.934	0.832	3.04215e-06
MAPKAPK2	1.76667e-10	0.252734	0.852	0.717	3.32735e-06
SH3KBP1	1.90641e-10	0.353225	0.795	0.625	3.59054e-06
ATP5D	2.28476e-10	0.251638	0.885	0.775	4.30311e-06
FSIP2	2.52711e-10	0.260256	0.557	0.322	4.75955e-06
DNAJC6	2.73549e-10	0.256452	0.705	0.467	5.15203e-06
SEC23A	3.26661e-10	0.259621	0.803	0.636	6.15234e-06
AEBP1	3.64515e-10	0.260537	0.721	0.501	6.86528e-06
ID2	4.52866e-10	0.332733	0.943	0.804	8.52928e-06
SRF	5.33839e-10	0.255642	0.803	0.681	1.00543e-05
MTRNR2L1	5.8457e-10	0.254742	0.951	0.888	1.10098e-05
HECA	8.99887e-10	0.26367	0.557	0.352	1.69485e-05
C6orf48	1.04794e-09	0.285818	0.934	0.856	1.97368e-05
AKAP13	1.72941e-09	0.337876	0.861	0.73	3.25717e-05
RAPGEF2	1.80855e-09	0.289207	0.713	0.539	3.40622e-05
ZNF83	2.00442e-09	0.301699	0.877	0.737	3.77513e-05
MARK1	4.23509e-09	0.258156	0.615	0.401	7.97637e-05
BNIP3	5.28477e-09	0.326664	0.91	0.82	9.95334e-05
ADD3	6.19383e-09	0.262183	0.926	0.854	0.000116655
KAT6B	8.57349e-09	0.276192	0.631	0.458	0.000161473
SREBF2	1.16158e-08	0.323045	0.672	0.526	0.000218773
JMJD1C	1.6314e-08	0.263041	0.844	0.742	0.000307257
USP47	2.48914e-08	0.251649	0.82	0.691	0.000468804
DLC1	2.55645e-08	0.251209	0.779	0.543	0.000481481
LEFTY2	4.48889e-08	0.343925	0.32	0.145	0.000845438
MT-TK	5.23553e-08	0.260324	0.779	0.692	0.000986059
SORD	5.6507e-08	0.393288	0.672	0.554	0.00106425
QPRT	6.48195e-08	0.274346	0.82	0.75	0.00122081
GNAO1	2.69829e-07	0.280593	0.369	0.198	0.00508196
DST	4.32525e-07	0.28488	0.861	0.727	0.00814618
VWDE	3.41795e-06	0.262505	0.795	0.652	0.0643737
SYNE2	0.00110572	0.394064	0.746	0.723	1
SH3BGR	0.00177066	0.256889	0.254	0.165	1

[truncated: 1 more sheets: cluster D19_3]
