# Supplementary material for: A single cell transcriptional roadmap of human pacemaker cell differentiation
Source: eLife. 2022 Oct 11;11:e76781. doi: 10.7554/eLife.76781 (PMC9553210; doi:10.7554/eLife.76781)
Supplement: Supplementary file 3. — Related to Figure 5. [file elife-76781-supp3.xlsx]

## Sheet: seg2 > seg1
DE gene list: epicardial segment 2 > common progenitor segment 1
	AUCPR	AUCPR.ratio	exp.fc	posFrac_1	posFrac_2	nTrans_1	nTrans_2
HSPB7	0.839	6.25093	5.33961	0.838	0.064	0.975	0.034
BEX3	0.812	6.04977	Inf	0.586	0	1.641	0
HNRNPDL	0.812	6.04977	Inf	0.586	0	1.31	0
LRRC75A-AS1	0.812	6.04977	Inf	0.586	0	1.167	0
RACK1	0.812	6.04977	Inf	0.586	0	2.463	0
RPS17	0.812	6.04977	Inf	0.586	0	1.629	0
SARAF	0.804	5.99016	Inf	0.568	0	1.606	0
TCAF1	0.804	5.99016	Inf	0.568	0	1.358	0
ZFAS1	0.804	5.99016	Inf	0.568	0	1.068	0
TCEAL9	0.8	5.96036	Inf	0.559	0	0.776	0
RSRP1	0.788	5.87095	Inf	0.532	0	0.836	0
TMEM176A	0.786	5.85605	9.71654	0.559	0.006	0.663	0.001
HACD3	0.784	5.84115	Inf	0.523	0	0.663	0
NORAD	0.784	5.84115	Inf	0.523	0	0.847	0
SNU13	0.784	5.84115	Inf	0.523	0	0.62	0
SLIT3	0.779	5.8039	4.10576	0.901	0.189	1.441	0.137
RNA45S5	0.776	5.78155	Inf	0.505	0	0.858	0
GLS	0.764	5.69214	2.28737	0.937	0.652	1.386	0.412
NFIA	0.764	5.69214	4.62561	0.793	0.108	1.12	0.067
FRAS1	0.752	5.60274	2.78385	0.91	0.507	1.504	0.341
TMEM176B	0.749	5.58039	7.60093	0.514	0.007	0.622	0.004
LAMA5	0.744	5.54314	1.94243	0.982	0.828	1.773	0.704
ALDH1A2	0.737	5.49098	7.85841	0.514	0.015	1.09	0.007
CRYAB	0.734	5.46863	4.18445	0.838	0.108	0.929	0.07
IGFBP5	0.725	5.40158	2.98312	0.964	0.57	3.094	0.966
ITGA3	0.719	5.35687	4.20377	0.811	0.126	1.017	0.078
COL9A3	0.713	5.31217	2.81964	0.838	0.447	1.298	0.271
TNNT1	0.713	5.31217	3.24573	0.775	0.373	1.242	0.194
PLAC9	0.71	5.28982	4.86599	0.64	0.066	0.726	0.032
FLJ44635	0.709	5.28237	5.69846	0.568	0.059	0.692	0.017
CARNS1	0.704	5.24512	5.8053	0.505	0.01	0.474	0.01
LGALS3BP	0.698	5.20041	3.46582	0.712	0.264	1	0.125
LHFP	0.684	5.09611	3.02466	0.919	0.331	1.259	0.228
EZR	0.681	5.07376	1.74013	0.973	0.859	1.898	0.861
HEY2	0.68	5.06631	3.89205	0.73	0.137	0.833	0.074
SYNPO	0.68	5.06631	3.94228	0.784	0.141	1.025	0.094
COL16A1	0.672	5.0067	4.82865	0.55	0.056	0.482	0.02
GAS6	0.67	4.9918	3.91869	0.676	0.127	0.647	0.053
MYH11	0.66	4.9173	4.45431	0.595	0.054	0.468	0.025
TBX18	0.654	4.87259	2.96938	0.991	0.302	2.075	0.496
MAP1LC3A	0.645	4.80554	2.91888	0.838	0.318	0.995	0.178
CSDC2	0.642	4.78319	4.07711	0.649	0.078	0.488	0.034
GUCY1A2	0.642	4.78319	3.41556	0.811	0.144	0.981	0.126
NECAB1	0.642	4.78319	4.6529	0.55	0.08	0.678	0.034
BMPR2	0.637	4.74594	2.37504	0.874	0.473	1.051	0.271
ID4	0.637	4.74594	2.48136	0.901	0.532	1.456	0.392
KIRREL	0.637	4.74594	4.4269	0.55	0.084	0.538	0.03
LOX	0.635	4.73104	4.6201	0.559	0.054	0.728	0.038
OLFML2A	0.635	4.73104	3.03298	0.739	0.258	0.753	0.116
ARSJ	0.633	4.71614	4.71842	0.514	0.034	0.509	0.023
PRSS35	0.633	4.71614	3.40305	0.73	0.215	0.872	0.109
SULF1	0.629	4.68633	3.27454	0.82	0.367	1.577	0.269
GRIK1	0.628	4.67888	4.53269	0.514	0.043	0.439	0.022
ADAMTS5	0.626	4.66398	3.98711	0.685	0.071	0.964	0.084
CCDC80	0.626	4.66398	2.64076	0.937	0.394	1.751	0.464
TRNP1	0.626	4.66398	4.14096	0.586	0.07	0.468	0.031
WISP1	0.626	4.66398	4.64019	0.55	0.054	0.811	0.043
NFIB	0.623	4.64163	2.62016	0.856	0.408	1.183	0.271
C3orf58	0.622	4.63418	2.36682	0.901	0.549	1.289	0.356
AGRN	0.621	4.62673	1.83149	0.973	0.726	1.309	0.501
COL4A2	0.62	4.61928	2.09022	0.973	0.753	2.039	0.791
IGFBP2	0.618	4.60438	2.05033	0.964	0.654	1.424	0.492
RCSD1	0.617	4.59693	2.99676	0.847	0.258	0.916	0.152
SORBS2	0.61	4.54477	3.00544	0.784	0.346	1.422	0.274
COL3A1	0.609	4.53732	2.2749	1	0.684	3.318	1.513
C1orf198	0.605	4.50752	1.80419	0.91	0.797	1.544	0.631
DPP7	0.603	4.49262	3.32389	0.721	0.159	0.685	0.085
PLS3	0.601	4.47772	1.61893	0.955	0.83	1.557	0.707
SOX6	0.6	4.47027	3.72157	0.703	0.103	0.777	0.076
LIMS2	0.599	4.46282	3.57354	0.631	0.102	0.523	0.052
CAPN2	0.595	4.43302	1.25401	0.955	0.891	1.648	0.922
LAMC2	0.593	4.41812	4.17277	0.514	0.07	0.423	0.027
COL4A1	0.592	4.41067	2.58793	0.964	0.483	1.637	0.434
EHD2	0.589	4.38832	2.5826	0.739	0.32	0.728	0.15
MIR100HG	0.589	4.38832	3.91608	0.622	0.064	0.532	0.042
MYRF	0.586	4.36596	1.52908	0.991	0.93	2.328	1.259
PTRF	0.585	4.35851	3.05281	0.712	0.184	0.646	0.095
NRBP2	0.583	4.34361	2.68542	0.847	0.284	0.723	0.139
CRIM1	0.582	4.33616	2.52934	0.784	0.434	1.042	0.243
CXXC5	0.58	4.32126	2.07335	0.784	0.482	0.8	0.234
FN1	0.578	4.30636	2.32811	1	0.918	3.166	1.372
COL6A3	0.577	4.29891	4.34878	0.541	0.07	0.922	0.062
DSEL	0.577	4.29891	3.13926	0.685	0.205	0.666	0.093
STT3B	0.576	4.29146	2.37181	0.766	0.43	0.793	0.191
COBLL1	0.575	4.28401	2.26751	0.811	0.497	1.068	0.296
EFNB2	0.572	4.26166	2.00417	0.892	0.647	1.442	0.514
PDLIM3	0.572	4.26166	2.9816	0.892	0.328	1.861	0.415
COL18A1	0.567	4.22441	1.31569	0.973	0.895	1.627	0.879
GATM	0.565	4.2095	4.12807	0.505	0.043	0.748	0.055
LAMC1	0.564	4.20205	0.953143	1	0.989	2.563	1.822
EPS8	0.563	4.1946	3.17792	0.757	0.141	0.757	0.106
FSTL1	0.563	4.1946	0.882797	1	0.987	2.387	1.72
SMOC2	0.561	4.1797	2.58347	0.811	0.27	0.959	0.211
ADAM33	0.56	4.17225	3.03867	0.658	0.239	0.718	0.109
BCHE	0.56	4.17225	3.03455	0.676	0.208	0.711	0.108
NCCRP1	0.559	4.1648	2.89941	0.892	0.247	1.172	0.224
SBSPON	0.558	4.15735	2.49669	0.739	0.401	1.168	0.288
MICAL2	0.555	4.135	2.25717	1	0.581	2.156	0.785
MSI2	0.553	4.1201	3.48211	0.514	0.138	0.504	0.053
PMEPA1	0.553	4.1201	4.03712	0.523	0.064	0.559	0.041
ZFP36L1	0.552	4.11265	1.38278	0.973	0.962	2.271	1.303
GNAQ	0.549	4.0903	3.61559	0.514	0.137	0.562	0.055
MYO1D	0.547	4.0754	2.57989	0.739	0.261	0.624	0.125
TMEM98	0.544	4.05305	1.4546	0.982	0.872	1.546	0.766
MYL12B	0.543	4.04559	1.11546	0.982	0.954	1.77	1.079
CAMK2N1	0.542	4.03814	3.31893	0.604	0.222	0.968	0.132
RIN2	0.54	4.02324	2.54807	0.748	0.299	0.738	0.156
GABRB2	0.539	4.01579	3.22635	0.577	0.142	0.604	0.078
FEM1B	0.538	4.00834	3.31976	0.514	0.131	0.458	0.053
NEAT1	0.538	4.00834	3.00083	0.685	0.297	0.841	0.136
EFNA5	0.534	3.97854	1.82601	0.883	0.696	1.364	0.53
PPP4R2	0.534	3.97854	2.68434	0.568	0.258	0.514	0.093
TNS1	0.531	3.95619	2.76044	0.721	0.228	0.69	0.125
TNNI3	0.529	3.94129	3.45614	0.55	0.108	0.472	0.05
CDKN1C	0.528	3.93384	1.86591	0.946	0.723	1.598	0.638
RDH10	0.528	3.93384	2.05187	0.811	0.663	1.666	0.608
PHLDB2	0.527	3.92639	2.16564	0.865	0.427	0.878	0.247
DSC3	0.524	3.90404	2.92212	0.883	0.161	0.988	0.176
SSPN	0.519	3.86678	3.42363	0.505	0.098	0.463	0.05
BST1	0.518	3.85933	3.38752	0.523	0.109	0.405	0.044
MAF	0.517	3.85188	3.37952	0.532	0.163	0.679	0.081
PDPN	0.513	3.82208	2.72738	0.577	0.258	0.673	0.124
CGNL1	0.512	3.81463	1.78369	0.928	0.622	1.352	0.537
TMED4	0.512	3.81463	2.67921	0.541	0.2	0.409	0.072
ARHGAP23	0.511	3.80718	2.24218	0.811	0.362	0.856	0.228
ANTXR1	0.51	3.79973	2.07234	0.865	0.454	0.825	0.243
APLP1	0.51	3.79973	1.83739	0.865	0.598	1.112	0.406
SH3GL3	0.509	3.79228	2.26719	0.667	0.327	0.632	0.156
LTBP3	0.507	3.77738	2.99925	0.514	0.147	0.384	0.054
COL4A6	0.505	3.76248	1.88458	0.856	0.556	0.934	0.318
FBN1	0.503	3.74758	2.23321	0.757	0.472	0.924	0.252
PAPPA	0.503	3.74758	2.98373	0.694	0.166	0.799	0.129
CCND1	0.499	3.71777	3.14716	0.622	0.113	0.657	0.091
PRDX6	0.498	3.71032	0.674375	0.973	0.997	2.351	1.836
CUX1	0.497	3.70287	1.34049	0.946	0.81	1.273	0.641
ARID5B	0.495	3.68797	2.87348	0.685	0.155	0.62	0.102
BNC1	0.494	3.68052	1.758	0.793	0.617	1.191	0.464
SCG5	0.494	3.68052	2.31233	0.748	0.341	0.721	0.177
COL4A5	0.493	3.67307	1.36937	0.901	0.817	1.29	0.641
SULF2	0.491	3.65817	1.73965	0.802	0.578	0.941	0.351
TTC3	0.489	3.64327	0.888412	0.964	0.941	1.635	1.096
GOLGA8B	0.484	3.60602	1.56566	0.847	0.591	0.854	0.348
LSAMP	0.484	3.60602	2.99823	0.631	0.127	0.621	0.094
CBX6	0.483	3.59857	1.83925	0.712	0.469	0.679	0.224
NPDC1	0.483	3.59857	2.89796	0.568	0.142	0.426	0.065
LOC646762	0.481	3.58367	1.41291	0.865	0.791	1.382	0.681
SPRY2	0.481	3.58367	3.17955	0.532	0.099	0.4	0.05
COL1A2	0.478	3.56132	1.23989	1	0.98	2.817	1.832
MAGED2	0.477	3.55386	0.960394	1	0.957	1.701	1.109
BMP1	0.475	3.53896	2.10663	0.721	0.381	0.705	0.197
DDR1	0.475	3.53896	1.58234	0.775	0.566	0.737	0.29
FHL1	0.475	3.53896	1.83742	0.901	0.589	1.194	0.444
MAGI2-AS3	0.474	3.53151	2.17824	0.847	0.415	0.975	0.279
ITGA1	0.473	3.52406	2.15512	0.811	0.422	0.983	0.286
NHSL1	0.467	3.47936	2.23882	0.748	0.306	0.622	0.156
SLIT2	0.465	3.46446	2.68443	0.73	0.172	0.666	0.126
CALD1	0.464	3.45701	0.960498	1	0.972	2.344	1.63
PAPSS2	0.464	3.45701	2.72262	0.595	0.186	0.476	0.083
NEK7	0.462	3.44211	1.67743	0.82	0.613	0.946	0.367
FBLN2	0.461	3.43466	2.07654	0.811	0.439	0.934	0.282
GJA1	0.46	3.42721	1.4344	0.775	0.771	1.415	0.693
IL11RA	0.46	3.42721	1.96852	0.613	0.355	0.539	0.158
TRPS1	0.46	3.42721	2.59775	0.676	0.191	0.543	0.105
ANKRD50	0.459	3.41976	1.43114	0.856	0.707	1.082	0.5
TGFBR1	0.459	3.41976	1.11187	0.955	0.845	1.228	0.697
CREB5	0.456	3.39741	2.78498	0.631	0.148	0.704	0.126
GNG12	0.456	3.39741	1.76384	0.937	0.574	1.008	0.376
SH2D3C	0.454	3.3825	2.73828	0.568	0.151	0.579	0.103
KANK4	0.453	3.37505	2.94179	0.514	0.154	0.623	0.098
CCDC3	0.452	3.3676	2.51798	0.694	0.27	0.938	0.214
MATN2	0.451	3.36015	2.20237	0.838	0.321	0.711	0.187
ABLIM1	0.45	3.3527	1.62898	0.91	0.623	1.016	0.412
AEBP1	0.449	3.34525	1.56563	0.784	0.571	0.795	0.32
FLRT2	0.449	3.34525	1.50385	0.955	0.739	1.492	0.713
FCGRT	0.448	3.3378	1.98203	0.649	0.351	0.525	0.152
HTRA1	0.447	3.33035	2.0232	0.703	0.415	0.869	0.267
LEPR	0.446	3.3229	1.37017	0.775	0.743	1.02	0.483
GALNT10	0.445	3.31545	2.32191	0.649	0.249	0.493	0.113
MAP3K1	0.445	3.31545	1.74703	0.874	0.598	1.079	0.413
EFNB1	0.444	3.308	2.05406	0.649	0.362	0.637	0.181
MOB1A	0.444	3.308	2.13198	0.568	0.277	0.451	0.116
SRPX	0.444	3.308	2.50475	0.559	0.219	0.427	0.085
RAB15	0.443	3.30055	1.85403	0.658	0.409	0.588	0.188
WSB1	0.442	3.2931	0.840225	0.991	0.965	1.832	1.281
DNAJC1	0.441	3.28565	1.63586	0.811	0.534	0.812	0.314
FAT3	0.44	3.2782	2.29727	0.658	0.331	0.742	0.185
CAMK2D	0.439	3.27075	1.42818	0.955	0.747	1.211	0.574
KCNA5	0.439	3.27075	2.66244	0.622	0.187	0.671	0.129
PLA2G12A	0.439	3.27075	1.87656	0.901	0.663	1.383	0.524
PPIC	0.439	3.27075	1.9088	0.802	0.405	0.673	0.212
PLXNB2	0.438	3.2633	1.26981	0.892	0.739	0.911	0.449
RHOBTB1	0.438	3.2633	2.16329	0.631	0.258	0.463	0.117
SMARCD3	0.438	3.2633	1.49209	0.784	0.55	0.789	0.332
CACNA1H	0.437	3.25585	2.60065	0.586	0.156	0.39	0.072
PXDC1	0.437	3.25585	2.51835	0.631	0.179	0.435	0.086
CDH11	0.435	3.24095	1.76182	0.838	0.573	1.129	0.433
MFAP4	0.434	3.2335	3.18997	0.532	0.289	1.04	0.158
SLC8A1	0.434	3.2335	2.26685	0.82	0.233	0.743	0.189
SEPT7	0.433	3.22605	0.701794	0.991	0.99	2.001	1.509
ARL6IP5	0.432	3.21859	1.02924	0.973	0.887	1.37	0.829
CRIP2	0.432	3.21859	2.18578	0.829	0.314	0.84	0.231
ZNF827	0.432	3.21859	1.72562	0.73	0.448	0.667	0.236
RFTN1	0.431	3.21114	2.40549	0.73	0.214	0.783	0.184
HNMT	0.43	3.20369	2.30541	0.613	0.256	0.574	0.136
PLEKHA1	0.428	3.18879	1.58171	0.775	0.504	0.661	0.256
PROS1	0.428	3.18879	1.82276	0.676	0.388	0.583	0.19
TNFRSF19	0.428	3.18879	2.04455	0.802	0.363	0.728	0.213
PALM	0.427	3.18134	1.37911	0.784	0.577	0.711	0.316
SLC9A3R1	0.424	3.15899	1.32427	0.775	0.747	1.257	0.637
FILIP1L	0.422	3.14409	2.8486	0.559	0.14	0.591	0.098
LIMS1	0.422	3.14409	1.46756	0.829	0.654	0.952	0.42
OLFML3	0.422	3.14409	1.30757	0.838	0.744	1.167	0.588
CDC42EP1	0.421	3.13664	1.76113	0.883	0.478	0.858	0.31
ATP10D	0.42	3.12919	2.53592	0.505	0.226	0.48	0.095
ATP1B2	0.42	3.12919	1.5891	0.901	0.603	1.008	0.418
ETS2	0.419	3.12174	2.37582	0.559	0.222	0.481	0.106
PACS1	0.419	3.12174	1.56452	0.802	0.552	0.786	0.316
C3orf70	0.418	3.11429	2.67468	0.541	0.102	0.433	0.077
IGFBP3	0.418	3.11429	2.20324	0.676	0.401	1.582	0.519
LIMA1	0.417	3.10684	1.83936	0.721	0.44	0.705	0.234
LAMB2	0.416	3.09939	1.12358	0.856	0.754	0.936	0.505
MDFIC	0.416	3.09939	1.69033	0.622	0.432	0.568	0.201
TGFB1I1	0.416	3.09939	2.39029	0.712	0.193	0.591	0.133
ADAM12	0.416	3.09939	2.4636	0.523	0.216	0.56	0.119
PLOD2	0.415	3.09194	1.22836	0.91	0.743	1.027	0.529
SPATS2L	0.413	3.07704	1.49398	0.829	0.627	0.924	0.399
LMO4	0.412	3.06959	1.17436	0.919	0.884	1.43	0.808
MN1	0.412	3.06959	1.58835	0.739	0.503	0.735	0.288
PHLDA3	0.41	3.05468	2.34676	0.631	0.203	0.508	0.115
CD47	0.409	3.04723	1.57414	0.757	0.547	0.775	0.309
DAAM1	0.409	3.04723	0.990806	0.928	0.842	1.23	0.746
CPXM1	0.408	3.03978	1.40823	0.73	0.542	0.678	0.294
FAT1	0.408	3.03978	1.39714	0.793	0.638	0.937	0.43
MALAT1	0.408	3.03978	0.994987	0.991	0.986	4.086	3.173
FAT4	0.407	3.03233	2.06862	0.604	0.268	0.461	0.124
IFITM2	0.406	3.02488	0.918556	0.955	0.953	1.604	1.056
ZYX	0.406	3.02488	0.939123	0.973	0.937	1.667	1.094
COL1A1	0.404	3.00998	0.884058	0.991	0.999	3.634	2.845
FZD1	0.404	3.00998	2.40768	0.649	0.237	0.65	0.147
PEA15	0.403	3.00253	1.06935	0.928	0.845	1.352	0.799
SAT1	0.403	3.00253	1.94932	0.55	0.391	0.612	0.185
DNAJC15	0.402	2.99508	1.09338	0.946	0.887	1.88	1.174
KLF13	0.401	2.98763	1.88547	0.658	0.348	0.548	0.17
LTBP4	0.4	2.98018	1.41632	0.694	0.626	0.799	0.353
MSRB3	0.399	2.97273	1.77511	0.793	0.413	0.703	0.243
KLF6	0.397	2.95783	1.79129	0.874	0.591	1.333	0.525
ZKSCAN1	0.397	2.95783	1.26563	0.838	0.682	0.923	0.457
AES	0.394	2.93548	1.09683	0.901	0.82	1.176	0.668
ARPC2	0.394	2.93548	0.590406	1	0.989	2.03	1.608
DMD	0.394	2.93548	2.34685	0.532	0.189	0.457	0.102
NFIC	0.394	2.93548	1.77778	0.64	0.346	0.547	0.182
MLXIP	0.392	2.92058	1.82923	0.604	0.374	0.497	0.158
SPAG9	0.392	2.92058	1.30846	0.757	0.568	0.682	0.315
MEF2A	0.391	2.91313	1.09973	0.865	0.729	0.907	0.494
PARD6B	0.391	2.91313	1.39738	0.694	0.574	0.738	0.326
BCL11A	0.389	2.89823	2.01425	0.658	0.286	0.538	0.153
ITGAV	0.389	2.89823	1.54646	0.802	0.689	1.129	0.492
LGI2	0.389	2.89823	2.27636	0.649	0.236	0.717	0.18
PARG	0.389	2.89823	1.49765	0.694	0.494	0.6	0.242
TIMP2	0.389	2.89823	1.49408	0.784	0.52	0.736	0.306
ASAP2	0.388	2.89077	1.65403	0.766	0.412	0.571	0.207
LITAF	0.388	2.89077	1.29632	0.919	0.778	1.281	0.662
SSBP3	0.387	2.88332	0.751887	0.964	0.923	1.267	0.876
TNRC18	0.386	2.87587	1.64418	0.703	0.416	0.531	0.192
VASN	0.386	2.87587	1.8395	0.658	0.314	0.5	0.158
DCAF8	0.385	2.86842	1.24139	0.811	0.652	0.749	0.365
SPTBN1	0.385	2.86842	1.05355	0.964	0.832	1.321	0.784
ASXL3	0.385	2.86842	1.7626	0.559	0.339	0.467	0.154
LGALS8	0.384	2.86097	1.73316	0.667	0.365	0.52	0.177
ZBTB7A	0.383	2.85352	1.75108	0.541	0.352	0.431	0.142
HCN4	0.382	2.84607	1.8797	0.856	0.425	1.192	0.432
JAK1	0.382	2.84607	1.51856	0.811	0.49	0.66	0.266
C1orf122	0.381	2.83862	1.05513	0.883	0.757	0.899	0.502
FOXN3	0.381	2.83862	0.895324	0.847	0.782	0.953	0.588
TMBIM1	0.381	2.83862	1.7139	0.694	0.37	0.509	0.175
C6orf48	0.379	2.82372	0.819496	0.901	0.888	1.145	0.754
KANK1	0.378	2.81627	2.06469	0.649	0.237	0.483	0.131
LRRN2	0.378	2.81627	2.24412	0.559	0.215	0.522	0.127
RELA	0.377	2.80882	1.79854	0.541	0.309	0.415	0.132
TNS3	0.375	2.79392	1.86257	0.55	0.286	0.446	0.137
UNC5B	0.375	2.79392	1.16513	0.919	0.784	1.283	0.713
MYH6	0.374	2.78647	2.3921	0.523	0.116	0.382	0.081
CDON	0.373	2.77902	1.70564	0.505	0.394	0.573	0.201
PLCB4	0.373	2.77902	2.25085	0.541	0.187	0.37	0.086
TRIM44	0.373	2.77902	1.01392	0.829	0.737	0.83	0.47
GNA11	0.372	2.77157	1.88212	0.514	0.292	0.385	0.115
MARCKS	0.372	2.77157	0.463475	1	0.99	2.408	2.044
THY1	0.372	2.77157	2.19908	0.523	0.209	0.444	0.109
LOC100129034	0.371	2.76412	2.04379	0.505	0.237	0.374	0.1
DAZAP2	0.369	2.74922	1.48778	0.811	0.476	0.638	0.261
FAM210B	0.368	2.74177	1.27375	0.73	0.599	0.753	0.36
DAP	0.367	2.73432	0.999165	0.838	0.728	0.822	0.469
TNNI1	0.367	2.73432	1.21738	0.982	0.859	2.201	1.349
AKT3	0.366	2.72686	1.46499	0.748	0.504	0.666	0.278
CCNL2	0.366	2.72686	0.870524	0.937	0.867	1.154	0.74
LINC00674	0.366	2.72686	1.10348	0.892	0.728	0.878	0.475
PTPRD	0.366	2.72686	1.10697	0.91	0.811	1.375	0.799
SHB	0.366	2.72686	2.00695	0.523	0.235	0.379	0.104
SPEG	0.366	2.72686	1.60572	0.802	0.454	0.64	0.243
BEX1	0.365	2.71941	1.39697	0.937	0.754	1.69	0.884
DNM1	0.365	2.71941	1.52164	0.685	0.478	0.648	0.26
SREBF2	0.365	2.71941	1.355	0.676	0.522	0.596	0.263
B3GNT5	0.364	2.71196	2.11211	0.514	0.214	0.347	0.088
FBXL5	0.364	2.71196	0.857367	0.829	0.821	0.949	0.598
NYNRIN	0.364	2.71196	1.11379	0.865	0.735	0.868	0.466
FGD6	0.363	2.70451	1.65133	0.721	0.397	0.575	0.209
RAI14	0.363	2.70451	1.32403	0.892	0.668	1.049	0.513
RRBP1	0.363	2.70451	1.09819	0.766	0.631	0.691	0.364
SEC31A	0.362	2.69706	0.737042	0.973	0.918	1.346	0.945
SEC63	0.362	2.69706	0.832815	0.82	0.795	0.882	0.559
NUAK1	0.361	2.68961	1.80658	0.586	0.334	0.529	0.172
CHD3	0.36	2.68216	1.11873	0.784	0.648	0.728	0.381
PNKD	0.359	2.67471	1.24816	0.874	0.616	0.706	0.34
WWTR1	0.359	2.67471	1.89608	0.595	0.299	0.452	0.136
IFITM3	0.358	2.66726	0.73209	1	0.993	2.513	1.939
LRP10	0.358	2.66726	1.41095	0.73	0.501	0.638	0.274
OSBPL9	0.358	2.66726	0.743708	0.901	0.884	1.155	0.793
ADCY6	0.357	2.65981	1.77987	0.541	0.291	0.399	0.128
OBSL1	0.357	2.65981	1.09306	0.919	0.753	0.947	0.521
MRC2	0.356	2.65236	1.26105	0.748	0.635	0.735	0.353
NCOR2	0.356	2.65236	1.10302	0.82	0.69	0.784	0.418
CXADR	0.355	2.64491	0.787673	0.91	0.873	1.211	0.817
TXNDC17	0.355	2.64491	1.08625	0.892	0.803	1.05	0.589
MBNL1	0.353	2.63001	1.96802	0.505	0.221	0.334	0.093
PIK3R1	0.353	2.63001	1.72397	0.595	0.365	0.512	0.175
PNRC1	0.353	2.63001	1.0026	0.937	0.831	1.201	0.721
RALGDS	0.353	2.63001	1.86459	0.568	0.27	0.408	0.124
S100A10	0.353	2.63001	1.08338	0.991	0.892	2.268	1.486
SACS	0.353	2.63001	1.24413	0.766	0.595	0.77	0.376
CAV2	0.352	2.62256	1.52306	0.631	0.434	0.602	0.239
NOTCH3	0.352	2.62256	0.879392	0.784	0.744	0.829	0.508
PDGFRB	0.352	2.62256	1.60421	0.523	0.355	0.492	0.181
PELO	0.352	2.62256	1.23386	0.775	0.694	0.961	0.488
PRAF2	0.352	2.62256	1.15074	0.874	0.705	0.908	0.48
TCF7L2	0.352	2.62256	0.888928	0.901	0.82	1.02	0.637
IL6ST	0.351	2.61511	0.904687	0.964	0.913	1.655	1.103
TNC	0.351	2.61511	0.983308	0.892	0.936	1.925	1.272
TTC14	0.35	2.60766	1.28788	0.676	0.483	0.526	0.239
AFF4	0.349	2.60021	0.963973	0.946	0.784	0.933	0.552
RBMS1	0.348	2.59276	0.810725	0.901	0.858	1.055	0.691
MXRA7	0.347	2.58531	0.778958	0.946	0.912	1.279	0.873
SIRT2	0.347	2.58531	1.45	0.748	0.451	0.571	0.236
TMSB4X	0.347	2.58531	0.874625	1	0.996	2.569	1.884
KCNMA1	0.346	2.57786	1.80882	0.748	0.33	0.815	0.283
PODXL	0.346	2.57786	0.977756	0.748	0.806	1.406	0.878
ANKRD10	0.345	2.57041	1.30485	0.676	0.535	0.599	0.273
CTGF	0.344	2.56295	1.87015	0.631	0.461	1.005	0.351
FAM127A	0.344	2.56295	0.796287	0.919	0.878	1.155	0.771
KIDINS220	0.342	2.54805	0.842602	0.901	0.848	1.073	0.692
LOXL1	0.342	2.54805	1.13022	0.703	0.687	0.844	0.447
RBFOX2	0.342	2.54805	0.646002	0.964	0.941	1.498	1.115
MARVELD1	0.341	2.5406	1.40823	0.685	0.439	0.493	0.206
IRF2BP2	0.34	2.53315	1.08694	0.847	0.747	0.925	0.509
MAP3K2	0.34	2.53315	1.15861	0.757	0.589	0.656	0.331
CD151	0.339	2.5257	0.793262	0.955	0.88	1.12	0.746
PTEN	0.339	2.5257	1.10002	0.775	0.635	0.724	0.383
RICTOR	0.339	2.5257	1.42377	0.712	0.444	0.541	0.226
SEC24D	0.339	2.5257	1.45434	0.676	0.454	0.555	0.228
SKI	0.339	2.5257	0.924036	0.82	0.715	0.707	0.415
C5orf24	0.338	2.51825	0.841029	0.919	0.824	1.021	0.655
STAT3	0.338	2.51825	1.43499	0.703	0.432	0.503	0.207
ZNF641	0.338	2.51825	1.48701	0.712	0.446	0.592	0.24
ANXA4	0.337	2.5108	1.64602	0.658	0.334	0.474	0.169
DVL3	0.337	2.5108	0.881814	0.901	0.816	0.978	0.61
BCAR1	0.336	2.50335	1.33186	0.712	0.487	0.564	0.251
PPP1R12A	0.336	2.50335	0.600048	0.883	0.891	1.126	0.832
SEMA6A	0.336	2.50335	1.28887	0.811	0.645	0.962	0.473
DNAJC6	0.335	2.4959	1.19696	0.712	0.532	0.641	0.315
NEK6	0.335	2.4959	1.86268	0.514	0.236	0.35	0.105
OSBPL10	0.335	2.4959	1.9505	0.505	0.193	0.304	0.085
SCARB2	0.335	2.4959	0.852917	0.874	0.839	0.985	0.625
SLC39A13	0.335	2.4959	1.48107	0.595	0.383	0.418	0.164
FNBP1L	0.334	2.48845	1.02609	0.757	0.631	0.692	0.381
CHSY1	0.333	2.481	1.28149	0.703	0.568	0.67	0.314
ITGB1	0.333	2.481	0.589773	1	0.993	2.118	1.687
CDV3	0.332	2.47355	0.823504	0.937	0.873	1.162	0.765
SYNE1	0.332	2.47355	1.6545	0.559	0.337	0.484	0.172
COL6A2	0.331	2.4661	0.899667	0.946	0.878	1.243	0.793
MYLIP	0.33	2.45865	1.90723	0.559	0.232	0.452	0.135
PDLIM2	0.33	2.45865	1.64333	0.613	0.307	0.383	0.134
VASH1	0.33	2.45865	1.8875	0.568	0.288	0.52	0.16
PPP1R12B	0.329	2.4512	1.63616	0.631	0.264	0.428	0.152
CD200	0.328	2.44375	1.31427	0.739	0.573	0.792	0.372
MAX	0.328	2.44375	1.24543	0.721	0.513	0.581	0.274
TSPAN3	0.328	2.44375	0.45766	0.955	0.962	1.354	1.093
DNAJB14	0.326	2.42885	1.49166	0.667	0.394	0.465	0.183
KRT18	0.326	2.42885	0.528304	0.955	0.98	2.504	2.084
MYL12A	0.326	2.42885	0.736617	0.955	0.937	1.446	1.025
SUN1	0.326	2.42885	1.18988	0.649	0.487	0.468	0.224
ANXA1	0.325	2.4214	1.90819	0.667	0.2	0.955	0.322
DSTYK	0.325	2.4214	1.25725	0.694	0.507	0.583	0.273
TBC1D9	0.325	2.4214	1.59145	0.55	0.303	0.335	0.12
FNDC3B	0.323	2.4065	0.919466	0.856	0.757	0.972	0.593
HEBP1	0.323	2.4065	1.40361	0.685	0.432	0.496	0.208
PHTF2	0.323	2.4065	1.19476	0.757	0.556	0.609	0.298
ROCK2	0.322	2.39905	1.09001	0.784	0.615	0.715	0.38
TUSC1	0.322	2.39905	1.29129	0.667	0.468	0.517	0.234
B2M	0.321	2.39159	0.849668	0.919	0.852	1.096	0.706
NID1	0.321	2.39159	1.14947	0.703	0.61	0.702	0.359
AKAP13	0.32	2.38414	0.947226	0.874	0.756	0.931	0.556
TJP1	0.32	2.38414	0.890246	0.883	0.782	0.939	0.58
DKK3	0.319	2.37669	1.24995	0.703	0.529	0.703	0.338
TIMP1	0.319	2.37669	0.663408	0.964	0.941	1.433	1.052
PRRC1	0.318	2.36924	0.913257	0.82	0.682	0.709	0.419
SIPA1L2	0.318	2.36924	1.19355	0.82	0.623	0.814	0.413
SKIL	0.318	2.36924	1.38303	0.73	0.466	0.624	0.272
FILIP1	0.317	2.36179	1.75273	0.649	0.242	0.518	0.174
PHF20L1	0.317	2.36179	0.910351	0.856	0.75	0.893	0.542
SNHG16	0.317	2.36179	0.495909	1	0.972	1.61	1.296
ST3GAL1	0.317	2.36179	1.19317	0.811	0.637	0.963	0.501
TRAF5	0.317	2.36179	1.48201	0.64	0.405	0.517	0.207
RGS3	0.316	2.35434	1.50863	0.658	0.433	0.617	0.248
ARMCX3	0.315	2.34689	1.06251	0.838	0.676	0.837	0.461
DOK4	0.315	2.34689	1.6384	0.811	0.362	0.94	0.373
TPBG	0.315	2.34689	1.31783	0.586	0.458	0.484	0.214
CSRP1	0.314	2.33944	1.39487	0.919	0.698	1.634	0.848
NXPH2	0.314	2.33944	1.17274	0.658	0.563	0.774	0.395
RAB11FIP1	0.314	2.33944	1.17826	0.685	0.568	0.722	0.364
SDC2	0.314	2.33944	0.861827	0.91	0.867	1.267	0.827
CCNYL1	0.313	2.33199	1.51552	0.55	0.376	0.441	0.17
HSPB1	0.313	2.33199	1.00767	1	0.953	2.109	1.405
MGST3	0.313	2.33199	0.958466	0.946	0.894	1.316	0.821
SEMA3A	0.313	2.33199	1.3235	0.802	0.571	0.986	0.477
TCEAL8	0.313	2.33199	0.875091	0.919	0.814	0.959	0.599
ZMAT3	0.313	2.33199	1.32601	0.793	0.543	0.706	0.324
ELL2	0.312	2.32454	1.36327	0.595	0.425	0.478	0.205
ARHGEF40	0.311	2.31709	1.15815	0.622	0.56	0.62	0.311
CBX4	0.311	2.31709	1.62268	0.541	0.267	0.386	0.137
COL5A2	0.311	2.31709	0.806773	0.937	0.869	1.35	0.915
RHPN2	0.311	2.31709	1.29764	0.586	0.485	0.557	0.253
EIF3M	0.31	2.30964	0.643043	0.874	0.848	0.955	0.679
PIK3R2	0.31	2.30964	0.73754	0.829	0.788	0.802	0.532
DYNC1LI2	0.309	2.30219	0.716047	0.874	0.806	0.888	0.602
HERC2P2	0.309	2.30219	1.62492	0.532	0.282	0.342	0.12
JOSD1	0.309	2.30219	1.26102	0.658	0.472	0.502	0.231
SEC23A	0.309	2.30219	1.12218	0.802	0.619	0.695	0.361
MAPKBP1	0.308	2.29474	1.65442	0.523	0.278	0.359	0.124
MYO1C	0.308	2.29474	0.956857	0.829	0.683	0.813	0.475
PDPR	0.308	2.29474	1.61132	0.505	0.295	0.347	0.123
TBL1XR1	0.308	2.29474	0.594429	0.874	0.872	0.996	0.73
CIRBP	0.307	2.28729	0.507592	0.973	0.968	1.554	1.24
LAPTM4B	0.307	2.28729	0.74827	0.991	0.939	1.8	1.309
LMNA	0.307	2.28729	1.21264	0.739	0.552	0.604	0.292
PCMTD2	0.307	2.28729	0.782148	0.712	0.694	0.642	0.407
POGK	0.307	2.28729	0.974453	0.766	0.624	0.65	0.367
PTGFRN	0.307	2.28729	1.36296	0.613	0.408	0.435	0.185
MTHFD1L	0.306	2.27984	1.24184	0.559	0.471	0.516	0.241
PRKAR1B	0.306	2.27984	1.54878	0.55	0.295	0.364	0.135
SENP7	0.306	2.27984	1.15144	0.658	0.476	0.465	0.228
DICER1	0.305	2.27239	0.827319	0.883	0.767	0.936	0.599
EVI5	0.305	2.27239	1.2339	0.631	0.459	0.498	0.233
KAZN	0.305	2.27239	1.25007	0.631	0.441	0.471	0.217
PLXND1	0.305	2.27239	1.6413	0.559	0.281	0.372	0.13
ADAM9	0.304	2.26494	1.37602	0.685	0.5	0.664	0.293
PARVA	0.304	2.26494	0.968173	0.892	0.75	0.932	0.55
PNMA1	0.304	2.26494	0.960265	0.865	0.73	0.839	0.491
PTPN21	0.304	2.26494	1.15628	0.604	0.478	0.472	0.231
RBMS3	0.304	2.26494	1.1726	0.793	0.552	0.767	0.391
RBPMS	0.304	2.26494	0.404854	0.973	0.971	1.638	1.376
SPINT2	0.304	2.26494	0.768021	0.955	0.92	1.486	1.041
TANC1	0.304	2.26494	1.25813	0.775	0.507	0.667	0.317
ANXA2	0.303	2.25749	0.506287	0.982	0.986	2.286	1.899
ARHGEF12	0.303	2.25749	1.16072	0.739	0.553	0.601	0.3
ENC1	0.303	2.25749	1.63616	0.604	0.346	0.743	0.283
HERPUD2	0.303	2.25749	0.979709	0.658	0.599	0.58	0.323
IGFBP4	0.303	2.25749	1.34563	0.577	0.475	0.631	0.282
SLC2A1	0.303	2.25749	1.26486	0.694	0.527	0.692	0.329
SMARCA1	0.303	2.25749	0.668227	0.946	0.894	1.181	0.846
SPTLC2	0.303	2.25749	1.28982	0.586	0.39	0.387	0.171
NFE2L2	0.302	2.25004	1.18698	0.703	0.531	0.61	0.3
SRSF8	0.302	2.25004	1.18617	0.703	0.503	0.526	0.255
CHPF	0.301	2.24259	1.15439	0.658	0.492	0.494	0.243
CLDND1	0.301	2.24259	0.610128	0.901	0.919	1.192	0.881
GPX7	0.301	2.24259	1.17201	0.685	0.461	0.484	0.235
RRAS	0.301	2.24259	1.37499	0.559	0.369	0.449	0.19
SCARF2	0.301	2.24259	1.52731	0.541	0.303	0.374	0.141
CMTM3	0.3	2.23514	0.997782	0.802	0.661	0.72	0.405
DDX17	0.3	2.23514	0.415472	1	0.983	1.818	1.533
GYG1	0.3	2.23514	1.15632	0.892	0.689	0.994	0.531
SLK	0.3	2.23514	1.18755	0.676	0.536	0.601	0.295
LEPROT	0.299	2.22768	0.704631	0.928	0.881	1.052	0.73
TAB2	0.299	2.22768	0.864964	0.856	0.705	0.728	0.444
CCDC50	0.298	2.22023	0.878117	0.865	0.774	0.9	0.557
DOCK4	0.298	2.22023	1.27645	0.559	0.42	0.452	0.204
PPP3CA	0.298	2.22023	0.906744	0.739	0.665	0.688	0.407
RSPRY1	0.298	2.22023	1.42838	0.523	0.335	0.352	0.141
APBB2	0.297	2.21278	1.23517	0.595	0.436	0.447	0.207
C14orf132	0.297	2.21278	1.60054	0.613	0.296	0.429	0.156
CLIC4	0.297	2.21278	0.707664	0.928	0.898	1.207	0.849
MACF1	0.297	2.21278	0.733268	0.919	0.867	1.219	0.847
PTPRF	0.297	2.21278	0.568931	0.937	0.934	1.335	1.019
DYRK4	0.296	2.20533	1.40047	0.586	0.38	0.469	0.196
GPC3	0.296	2.20533	1.70579	0.622	0.377	0.715	0.259
CFLAR	0.295	2.19788	0.967863	0.829	0.691	0.793	0.459
PDLIM5	0.295	2.19788	1.00169	0.982	0.845	1.447	0.897
RGL1	0.295	2.19788	1.30073	0.694	0.433	0.554	0.251
ARF4	0.294	2.19043	0.54595	0.982	0.951	1.496	1.168
PRKAR1A	0.294	2.19043	0.506046	0.982	0.961	1.61	1.29
PSD3	0.294	2.19043	1.45639	0.541	0.408	0.516	0.21
COL5A1	0.293	2.18298	0.608137	0.946	0.918	1.42	1.07
ZNF704	0.293	2.18298	1.32829	0.532	0.377	0.443	0.193
FAM84B	0.292	2.17553	0.969251	0.928	0.789	1.538	0.98
SMTNL2	0.292	2.17553	1.03545	0.685	0.529	0.624	0.338
CERCAM	0.291	2.16808	1.0329	0.685	0.539	0.557	0.299
HERPUD1	0.291	2.16808	1.22342	0.64	0.459	0.493	0.232
NDN	0.291	2.16808	0.681723	0.883	0.818	0.847	0.583
OSBPL1A	0.291	2.16808	0.883041	0.784	0.644	0.676	0.405
XBP1	0.291	2.16808	1.06517	0.766	0.559	0.614	0.326
AGPAT3	0.29	2.16063	1.45956	0.55	0.307	0.38	0.15
ARPC5	0.29	2.16063	0.601604	0.955	0.911	1.309	0.981
MXRA8	0.29	2.16063	1.14713	0.739	0.543	0.722	0.371
SOS2	0.29	2.16063	1.07055	0.613	0.501	0.454	0.234
TMEM43	0.29	2.16063	1.25737	0.667	0.429	0.461	0.211
YME1L1	0.29	2.16063	0.498169	0.964	0.926	1.22	0.957
ZNF853	0.29	2.16063	1.45631	0.514	0.306	0.351	0.138
ARL8B	0.289	2.15318	0.829046	0.667	0.603	0.564	0.344
DDAH1	0.289	2.15318	1.53816	0.676	0.346	0.654	0.26
FYTTD1	0.288	2.14573	0.746189	0.73	0.691	0.655	0.425
GOLGA3	0.288	2.14573	0.949958	0.739	0.595	0.549	0.31
C20orf194	0.287	2.13828	1.50204	0.541	0.302	0.361	0.138
CMYA5	0.287	2.13828	1.38342	0.703	0.391	0.618	0.269
PXDN	0.287	2.13828	0.606022	0.982	0.953	1.671	1.284
TP53INP2	0.287	2.13828	1.40193	0.577	0.377	0.502	0.211
COPA	0.286	2.13083	0.483708	0.955	0.946	1.283	1.018
TMED3	0.286	2.13083	1.03091	0.757	0.578	0.587	0.317
NCKAP5L	0.285	2.12338	1.30107	0.559	0.374	0.396	0.174
S100A16	0.285	2.12338	1.54359	0.568	0.291	0.417	0.157
SEZ6L2	0.284	2.11593	0.991927	0.694	0.58	0.594	0.329
TMED5	0.284	2.11593	1.05964	0.685	0.55	0.576	0.305
CYB5R3	0.283	2.10848	0.43085	0.955	0.953	1.291	1.052
NAB1	0.283	2.10848	1.27709	0.604	0.405	0.444	0.2
TEX2	0.283	2.10848	1.53258	0.505	0.267	0.348	0.13
FAM129B	0.282	2.10103	1.08345	0.721	0.529	0.547	0.284
RAB31	0.282	2.10103	0.757824	0.874	0.851	1.185	0.81
REXO2	0.282	2.10103	0.65343	0.829	0.789	0.812	0.566
UACA	0.282	2.10103	0.985102	0.784	0.633	0.75	0.427
MYL9	0.281	2.09358	0.661152	1	0.973	2.261	1.765
S100A6	0.281	2.09358	1.43584	0.541	0.303	0.393	0.158
ARID4B	0.28	2.08613	0.71742	0.838	0.735	0.829	0.558
B4GALNT4	0.28	2.08613	1.09381	0.649	0.508	0.511	0.262
EIF2AK4	0.28	2.08613	0.825992	0.703	0.666	0.634	0.391
NPTN	0.28	2.08613	0.744524	0.883	0.835	0.997	0.673
SMC5	0.28	2.08613	0.866617	0.721	0.663	0.644	0.388
CAMSAP2	0.279	2.07868	0.890464	0.757	0.648	0.648	0.385
MTDH	0.279	2.07868	0.610795	0.919	0.887	1.102	0.808
PRICKLE1	0.279	2.07868	1.28462	0.631	0.397	0.527	0.24
ZNF117	0.279	2.07868	0.912581	0.73	0.615	0.62	0.362
EFEMP2	0.278	2.07123	0.996429	0.685	0.557	0.537	0.294
EXT1	0.278	2.07123	1.10451	0.721	0.501	0.534	0.273
GNAI1	0.278	2.07123	1.22777	0.595	0.426	0.449	0.209
GOLGB1	0.278	2.07123	0.667191	0.91	0.841	1.061	0.752
RAB32	0.278	2.07123	1.38811	0.577	0.31	0.384	0.159
SEMA3C	0.278	2.07123	1.3141	0.649	0.402	0.614	0.279
PAK4	0.277	2.06377	0.784432	0.856	0.761	0.825	0.534
PHLDB1	0.277	2.06377	0.922381	0.766	0.622	0.606	0.351
PLEC	0.277	2.06377	0.659788	0.793	0.779	0.832	0.579
USP47	0.277	2.06377	0.701214	0.856	0.786	0.826	0.561
CREB3L1	0.276	2.05632	1.06802	0.784	0.58	0.794	0.433
CTNNA1	0.276	2.05632	0.513915	0.964	0.943	1.295	1.013
DNAJB6	0.276	2.05632	0.568157	0.919	0.888	0.973	0.722
KCTD3	0.276	2.05632	0.761595	0.802	0.736	0.725	0.47
KIF13A	0.276	2.05632	0.927902	0.838	0.697	0.793	0.47
MFAP2	0.276	2.05632	0.557657	0.901	0.918	1.205	0.916
PDE10A	0.276	2.05632	1.34242	0.568	0.332	0.38	0.162
FAM114A1	0.275	2.04887	1.06202	0.568	0.504	0.549	0.289
IQGAP1	0.275	2.04887	0.506901	0.883	0.878	1.111	0.861
OPTN	0.275	2.04887	1.25007	0.631	0.409	0.471	0.217
RAB2A	0.275	2.04887	0.616628	0.937	0.883	1.05	0.764
AAK1	0.274	2.04142	0.838978	0.739	0.634	0.619	0.378
CLIP3	0.274	2.04142	0.831806	0.856	0.733	0.863	0.546
GNB4	0.274	2.04142	0.732309	0.712	0.714	0.691	0.454
SCYL2	0.274	2.04142	0.976905	0.541	0.5	0.455	0.249
ZFHX3	0.274	2.04142	1.10722	0.793	0.563	0.703	0.369
CDH2	0.273	2.03397	0.775671	0.892	0.839	1.045	0.697
CNN1	0.273	2.03397	1.37132	0.658	0.416	0.706	0.315
SBDS	0.273	2.03397	1.18657	0.577	0.402	0.399	0.189
TNKS1BP1	0.273	2.03397	0.87123	0.739	0.606	0.57	0.339
NFKB1	0.272	2.02652	1.49993	0.505	0.23	0.254	0.095
DCUN1D1	0.271	2.01907	1.09733	0.532	0.429	0.361	0.18
DNAJB2	0.271	2.01907	1.23606	0.604	0.372	0.354	0.161
ECE1	0.271	2.01907	0.984491	0.559	0.518	0.503	0.276
INF2	0.271	2.01907	1.05274	0.64	0.468	0.451	0.235
NKTR	0.271	2.01907	0.631271	0.892	0.828	1.031	0.743
NOTCH2	0.271	2.01907	0.812743	0.847	0.732	0.816	0.519
SLC4A2	0.271	2.01907	0.841267	0.793	0.684	0.674	0.414
APP	0.27	2.01162	0.724838	0.982	0.923	1.375	0.974
GBAS	0.27	2.01162	0.656467	0.856	0.841	0.899	0.631
RCN1	0.27	2.01162	0.554743	0.928	0.89	1.076	0.811
ABCA1	0.269	2.00417	1.27591	0.604	0.413	0.597	0.277
HADHB	0.269	2.00417	0.674417	0.883	0.793	0.805	0.554
KLHDC8B	0.269	2.00417	1.15041	0.622	0.464	0.476	0.234
STK40	0.269	2.00417	1.24144	0.541	0.342	0.324	0.146
XPO4	0.269	2.00417	0.91774	0.559	0.568	0.513	0.294
CDK19	0.268	1.99672	1.20298	0.559	0.362	0.361	0.168
KANK2	0.268	1.99672	0.906534	0.658	0.582	0.537	0.311
PDK2	0.268	1.99672	1.03336	0.622	0.501	0.488	0.259
SPIN4	0.268	1.99672	1.0234	0.622	0.589	0.722	0.4
STAT6	0.268	1.99672	1.17234	0.685	0.475	0.583	0.288
ZNF83	0.268	1.99672	0.688928	0.883	0.81	1.04	0.727
DMKN	0.267	1.98927	0.694291	0.685	0.722	0.751	0.508
FREM2	0.267	1.98927	1.27576	0.73	0.55	1.156	0.592
KTN1	0.267	1.98927	0.420507	0.964	0.932	1.294	1.06
PPFIBP1	0.267	1.98927	0.929855	0.73	0.582	0.554	0.317
SEC13	0.267	1.98927	0.542497	0.883	0.867	0.958	0.72
UBE2E2	0.267	1.98927	1.24849	0.55	0.37	0.365	0.165
ATP2C1	0.266	1.98182	0.785135	0.793	0.726	0.694	0.442
BEX2	0.266	1.98182	1.007	0.586	0.468	0.458	0.246
GOLGA2	0.266	1.98182	0.945529	0.622	0.518	0.485	0.272
MOAP1	0.266	1.98182	1.26355	0.523	0.314	0.32	0.142
MAP4	0.265	1.97437	0.578189	0.946	0.906	1.179	0.885
PICALM	0.265	1.97437	0.801021	0.784	0.707	0.703	0.444
UBR4	0.265	1.97437	0.621688	0.937	0.898	1.26	0.931
VCAN	0.265	1.97437	0.585153	0.91	0.934	2.091	1.666
AKAP9	0.264	1.96692	0.646437	0.892	0.809	1.026	0.733
AXL	0.264	1.96692	0.700162	0.937	0.869	1.176	0.828
MGARP	0.264	1.96692	1.29038	0.559	0.351	0.431	0.192
OAT	0.264	1.96692	0.934211	0.721	0.581	0.578	0.331
RGS5	0.264	1.96692	1.11985	0.838	0.568	1.114	0.619
TRIM8	0.264	1.96692	1.11127	0.55	0.398	0.366	0.181
AFF1	0.263	1.95947	0.835826	0.775	0.644	0.636	0.39
CTDSP2	0.263	1.95947	0.597409	0.91	0.873	1	0.732
FNDC3A	0.263	1.95947	0.857181	0.784	0.649	0.633	0.383
EML4	0.262	1.95202	0.523509	0.829	0.852	0.907	0.686
NFE2L1	0.262	1.95202	0.563215	0.82	0.733	0.672	0.487
FAM107B	0.26	1.93712	1.10482	0.595	0.458	0.467	0.236
MRAS	0.26	1.93712	1.12638	0.577	0.391	0.398	0.196
CCDC8	0.259	1.92967	0.988527	0.667	0.472	0.453	0.246
MLLT1	0.259	1.92967	0.597815	0.892	0.837	0.89	0.645
MMP2	0.259	1.92967	0.867793	0.829	0.74	0.924	0.577
PON2	0.259	1.92967	0.674497	0.775	0.749	0.743	0.508
AEBP2	0.258	1.92222	0.798143	0.595	0.518	0.401	0.244
ARHGAP21	0.258	1.92222	0.80172	0.784	0.689	0.712	0.45
JUP	0.258	1.92222	0.575376	0.955	0.93	1.309	0.994
WBP1L	0.258	1.92222	0.953425	0.595	0.504	0.447	0.248
ZNF131	0.258	1.92222	1.06602	0.532	0.415	0.38	0.194
FAM177A1	0.257	1.91477	0.814816	0.685	0.612	0.529	0.324
FRMD4B	0.257	1.91477	1.04205	0.811	0.587	0.863	0.483
SPIN1	0.257	1.91477	0.556883	0.856	0.817	0.836	0.617
CHST3	0.256	1.90732	1.31749	0.523	0.299	0.357	0.154
CYSTM1	0.256	1.90732	1.17228	0.55	0.38	0.374	0.178
DGKD	0.256	1.90732	1.03281	0.541	0.426	0.394	0.206
GSN	0.256	1.90732	1.17573	0.541	0.416	0.412	0.197
RERE	0.256	1.90732	0.689702	0.829	0.747	0.73	0.494
TAX1BP1	0.256	1.90732	0.489699	0.937	0.919	1.135	0.889
CALCOCO1	0.255	1.89986	0.904329	0.694	0.556	0.509	0.294
ERCC-00003	0.255	1.89986	0.609765	0.991	0.972	1.427	1.075
ERCC-00145	0.255	1.89986	0.709471	0.883	0.86	1.006	0.693
GUK1	0.255	1.89986	0.724441	0.739	0.67	0.57	0.371
PIAS1	0.255	1.89986	0.80384	0.595	0.603	0.515	0.317
SND1	0.255	1.89986	0.43121	0.946	0.927	1.196	0.969
TMX3	0.255	1.89986	0.939815	0.631	0.501	0.435	0.243
HMBOX1	0.254	1.89241	0.957043	0.559	0.471	0.414	0.228
UBXN4	0.254	1.89241	0.420231	0.955	0.941	1.337	1.098
KCTD20	0.253	1.88496	0.972721	0.739	0.531	0.523	0.29
KDELR3	0.253	1.88496	1.19847	0.505	0.358	0.386	0.181
LDOC1L	0.253	1.88496	1.01423	0.658	0.482	0.453	0.242
UBE2G2	0.253	1.88496	0.739706	0.721	0.634	0.575	0.371
ANKRD12	0.252	1.87751	0.692766	0.784	0.729	0.779	0.529
BNIP2	0.252	1.87751	0.966301	0.622	0.508	0.464	0.256
CDK6	0.252	1.87751	0.728155	0.838	0.778	1.026	0.701
CHURC1	0.252	1.87751	0.77298	0.838	0.709	0.698	0.448
ELOVL1	0.252	1.87751	0.994977	0.559	0.429	0.378	0.202
LRRC32	0.252	1.87751	1.05979	0.649	0.482	0.595	0.316
NEO1	0.252	1.87751	0.627465	0.82	0.786	0.831	0.589
RHOC	0.252	1.87751	0.582377	0.874	0.848	0.985	0.726
SOX4	0.252	1.87751	0.501458	1	0.989	2.527	2.126
TMEM132A	0.252	1.87751	0.779454	0.802	0.712	0.712	0.456
TWF1	0.252	1.87751	0.974784	0.568	0.473	0.415	0.226
YIPF5	0.252	1.87751	0.71321	0.766	0.687	0.636	0.42
CCND2	0.251	1.87006	0.568289	0.973	0.947	1.689	1.322
CREB3L2	0.251	1.87006	0.820323	0.757	0.617	0.602	0.371
CST3	0.251	1.87006	0.527291	0.865	0.874	1.058	0.808
GOLIM4	0.251	1.87006	1.13465	0.55	0.381	0.419	0.206
RNH1	0.251	1.87006	0.877092	0.631	0.543	0.469	0.274
SH3PXD2B	0.251	1.87006	0.848371	0.586	0.514	0.45	0.267
TNFRSF1A	0.251	1.87006	0.889446	0.541	0.454	0.366	0.209
ASAH1	0.25	1.86261	0.805015	0.811	0.686	0.706	0.445
HCFC1R1	0.25	1.86261	0.758587	0.667	0.595	0.509	0.322
MAN2A1	0.25	1.86261	0.841997	0.595	0.546	0.497	0.298
MYH9	0.25	1.86261	0.494904	1	0.979	1.862	1.521
PTP4A3	0.25	1.86261	1.21407	0.514	0.349	0.337	0.155
RNF8	0.25	1.86261	0.942486	0.541	0.465	0.39	0.216
TNNT2	0.25	1.86261	0.933929	0.991	0.77	1.626	1.065
VAMP2	0.25	1.86261	0.611803	0.874	0.845	0.908	0.654
ACTA2	0.249	1.85516	1.29427	0.676	0.594	1.772	0.989
CASC4	0.249	1.85516	0.814974	0.793	0.666	0.642	0.399
LRP2	0.249	1.85516	0.602371	0.712	0.749	1.005	0.734
NFAT5	0.249	1.85516	0.666798	0.748	0.712	0.676	0.461
PIAS2	0.249	1.85516	0.891119	0.604	0.475	0.411	0.236
PIGS	0.249	1.85516	0.710729	0.793	0.656	0.604	0.398
USP13	0.249	1.85516	0.685078	0.766	0.711	0.687	0.464
DPP8	0.248	1.84771	0.821428	0.568	0.517	0.435	0.262
FYN	0.248	1.84771	0.669865	0.811	0.732	0.714	0.488
KLHL24	0.248	1.84771	0.909335	0.73	0.581	0.611	0.357
RNF103	0.248	1.84771	0.989679	0.595	0.466	0.417	0.225
SH3GLB2	0.248	1.84771	1.09378	0.559	0.394	0.347	0.173
SLC7A7	0.248	1.84771	1.06943	0.541	0.415	0.432	0.222
TRO	0.248	1.84771	0.751644	0.766	0.677	0.634	0.409
ZNF706	0.248	1.84771	0.62591	0.784	0.751	0.697	0.488
ATP13A3	0.247	1.84026	0.715194	0.802	0.733	0.754	0.504
DCHS1	0.247	1.84026	1.01646	0.586	0.458	0.399	0.211
EPM2AIP1	0.247	1.84026	0.638567	0.919	0.856	1.022	0.733
SEC61A1	0.247	1.84026	0.654502	0.793	0.736	0.685	0.471
SNX27	0.247	1.84026	0.649558	0.712	0.697	0.615	0.421
VPS8	0.247	1.84026	0.926489	0.676	0.518	0.473	0.268
ZNF275	0.247	1.84026	1.07003	0.64	0.457	0.479	0.248
BNIP3L	0.246	1.83281	0.456697	0.919	0.89	1.056	0.837
ERCC-00136	0.246	1.83281	0.604982	0.937	0.892	1.069	0.784
FAM200B	0.246	1.83281	0.838163	0.793	0.663	0.713	0.441
FBLIM1	0.246	1.83281	1.09686	0.541	0.432	0.452	0.229
LTBP1	0.246	1.83281	0.939228	0.667	0.588	0.615	0.353
TMF1	0.246	1.83281	0.901289	0.658	0.506	0.466	0.268
UBE2J1	0.246	1.83281	0.661448	0.784	0.703	0.615	0.418
VAMP3	0.246	1.83281	0.656609	0.811	0.753	0.721	0.497
ACTN2	0.245	1.82536	1.30355	0.523	0.26	0.386	0.169
ADI1	0.245	1.82536	0.773406	0.703	0.651	0.678	0.434
AHSA2	0.245	1.82536	0.809007	0.685	0.567	0.489	0.299
ATAD1	0.245	1.82536	0.816609	0.676	0.561	0.468	0.284
BTBD1	0.245	1.82536	0.971927	0.55	0.434	0.357	0.193
CPNE2	0.245	1.82536	1.02856	0.649	0.458	0.504	0.269
ELF2	0.245	1.82536	0.921504	0.514	0.447	0.358	0.2
EPS15	0.245	1.82536	0.803776	0.793	0.68	0.688	0.433
HDAC5	0.245	1.82536	0.839168	0.685	0.553	0.457	0.273
JMJD1C	0.245	1.82536	0.745011	0.748	0.69	0.71	0.464
OXR1	0.245	1.82536	0.870838	0.685	0.559	0.526	0.311
RAB11FIP2	0.245	1.82536	1.0251	0.577	0.425	0.385	0.202
ZNF512	0.245	1.82536	0.774824	0.505	0.494	0.366	0.225
CHML	0.244	1.81791	1.00074	0.568	0.455	0.432	0.232
ITGB5	0.244	1.81791	0.941525	0.703	0.522	0.507	0.286
MLLT4	0.244	1.81791	0.504189	0.865	0.867	0.976	0.75
RHOG	0.244	1.81791	0.812953	0.631	0.592	0.533	0.327
ST6GALNAC3	0.244	1.81791	0.909761	0.64	0.52	0.509	0.293
ARL4D	0.243	1.81046	0.704134	0.703	0.637	0.665	0.443
CDC42EP3	0.243	1.81046	0.909569	0.766	0.623	0.957	0.586
GABBR1	0.243	1.81046	1.06024	0.514	0.363	0.325	0.165
MLLT6	0.243	1.81046	0.809707	0.667	0.553	0.463	0.282
PFDN1	0.243	1.81046	0.556163	0.865	0.841	0.876	0.649
PHC2	0.243	1.81046	0.886775	0.685	0.52	0.507	0.296
TEAD3	0.243	1.81046	0.724289	0.82	0.742	0.748	0.497
TOM1L2	0.243	1.81046	1.097	0.514	0.344	0.342	0.17
ZFC3H1	0.243	1.81046	0.70012	0.64	0.606	0.545	0.359
CD164	0.242	1.80301	0.425405	0.91	0.925	1.055	0.85
FAM179B	0.242	1.80301	0.888143	0.514	0.441	0.374	0.214
NOVA1	0.242	1.80301	0.579683	0.73	0.744	0.716	0.516
TCEAL7	0.242	1.80301	1.13258	0.577	0.395	0.508	0.254
VEZT	0.242	1.80301	0.683419	0.784	0.705	0.656	0.442
ASAP1	0.241	1.79556	0.696342	0.748	0.662	0.623	0.415
GIPC1	0.241	1.79556	0.562165	0.766	0.771	0.656	0.475
MAGEH1	0.241	1.79556	0.884714	0.712	0.545	0.492	0.287
STX12	0.241	1.79556	0.964257	0.604	0.473	0.438	0.241
TSEN34	0.241	1.79556	0.736476	0.766	0.669	0.66	0.431
UBE2H	0.241	1.79556	0.580499	0.919	0.878	1.055	0.783
YIF1A	0.241	1.79556	0.783854	0.64	0.554	0.459	0.284
BCL9L	0.24	1.78811	0.786089	0.721	0.613	0.583	0.366
FKBP14	0.24	1.78811	1.06046	0.532	0.39	0.364	0.186
GALNT2	0.24	1.78811	0.620844	0.667	0.728	0.663	0.464
LRRC58	0.24	1.78811	0.682597	0.694	0.628	0.548	0.365
RAB21	0.24	1.78811	0.880855	0.631	0.528	0.441	0.256
SERINC1	0.24	1.78811	0.536641	0.883	0.858	0.928	0.698
AGAP1	0.239	1.78066	0.994574	0.559	0.45	0.446	0.241
MGAT4B	0.239	1.78066	0.832842	0.658	0.56	0.485	0.292
XIST	0.239	1.78066	0.738643	0.784	0.675	0.912	0.612
AAMDC	0.238	1.77321	1.05824	0.505	0.378	0.319	0.162
DSP	0.238	1.77321	0.523878	0.937	0.966	1.911	1.546
EMP3	0.238	1.77321	0.818293	0.604	0.539	0.504	0.307
ERCC-00042	0.238	1.77321	0.530437	0.955	0.975	1.457	1.143
ULK2	0.238	1.77321	0.870636	0.676	0.524	0.456	0.267
ZCCHC24	0.238	1.77321	0.841803	0.775	0.644	0.707	0.436
ZNF84	0.238	1.77321	0.84591	0.64	0.52	0.443	0.263
KIF21A	0.237	1.76576	0.551191	0.703	0.704	0.652	0.475
SAR1A	0.237	1.76576	0.51736	0.802	0.809	0.755	0.566
SETX	0.237	1.76576	0.460412	0.748	0.778	0.759	0.588
SORBS3	0.237	1.76576	0.624872	0.847	0.792	0.865	0.616
ACBD3	0.236	1.75831	0.823538	0.676	0.542	0.487	0.295
ATP2B4	0.236	1.75831	0.589365	0.883	0.849	1.021	0.752
LOC728392	0.236	1.75831	1.02813	0.541	0.443	0.455	0.241
PLEKHG3	0.236	1.75831	0.886157	0.667	0.528	0.486	0.283
RAB14	0.236	1.75831	0.49762	0.838	0.824	0.809	0.616
SLC39A6	0.236	1.75831	0.786785	0.658	0.55	0.472	0.292
TMED10	0.236	1.75831	0.401119	0.91	0.894	1.017	0.828
TTC17	0.236	1.75831	0.633812	0.811	0.771	0.76	0.533
ACTR10	0.235	1.75086	0.589487	0.865	0.756	0.712	0.51
CYFIP2	0.235	1.75086	0.977412	0.514	0.408	0.426	0.232
DST	0.235	1.75086	0.673454	0.766	0.691	0.748	0.512
SURF6	0.235	1.75086	0.839587	0.631	0.518	0.435	0.259
TTYH3	0.235	1.75086	0.576333	0.883	0.802	0.76	0.551
ZFX	0.235	1.75086	0.809312	0.55	0.493	0.388	0.234
CELF2	0.234	1.74341	0.512866	0.847	0.849	1.071	0.825
DFNA5	0.234	1.74341	0.954738	0.532	0.416	0.374	0.205
AASDHPPT	0.233	1.73595	0.459267	0.829	0.858	0.887	0.694
IGF1R	0.233	1.73595	0.683201	0.874	0.772	0.853	0.587
LZTR1	0.233	1.73595	0.920427	0.523	0.437	0.373	0.209
RABGAP1	0.233	1.73595	0.726925	0.775	0.669	0.648	0.425
RSF1	0.233	1.73595	0.630185	0.775	0.726	0.72	0.504
RUFY3	0.233	1.73595	0.667905	0.73	0.682	0.602	0.407
SEPT10	0.233	1.73595	0.505097	0.793	0.77	0.73	0.55
CTTN	0.232	1.7285	0.62813	0.793	0.736	0.663	0.462
FHL3	0.232	1.7285	1.03709	0.523	0.369	0.357	0.185
PAM	0.232	1.7285	0.510711	0.838	0.841	0.939	0.717
PDCD4	0.232	1.7285	0.694885	0.739	0.633	0.559	0.37
RHBDF1	0.232	1.7285	0.763994	0.64	0.578	0.524	0.331
TERF2IP	0.232	1.7285	0.632556	0.847	0.786	0.845	0.598
ZBTB4	0.232	1.7285	0.886447	0.532	0.429	0.332	0.189
ANK3	0.231	1.72105	0.67629	0.883	0.8	1.333	0.964
ARMCX1	0.231	1.72105	0.775914	0.523	0.461	0.374	0.23
CMPK1	0.231	1.72105	0.690063	0.685	0.626	0.539	0.357
MEIS3P1	0.231	1.72105	0.860958	0.595	0.468	0.389	0.227
RYK	0.231	1.72105	0.772178	0.694	0.563	0.477	0.298
UBQLN2	0.231	1.72105	0.603644	0.721	0.709	0.618	0.435
ZBTB1	0.231	1.72105	0.785148	0.604	0.535	0.441	0.272
ARHGEF10	0.23	1.7136	0.712313	0.541	0.496	0.397	0.255
BAMBI	0.23	1.7136	0.595636	0.829	0.851	1.201	0.895
CAST	0.23	1.7136	0.433816	0.811	0.837	0.8	0.631
CLK1	0.23	1.7136	0.750784	0.577	0.524	0.426	0.268
GAS5	0.23	1.7136	0.442545	0.883	0.89	0.978	0.777
NCAM1	0.23	1.7136	0.773194	0.631	0.739	0.942	0.622
SH3BP4	0.23	1.7136	0.665078	0.793	0.784	0.903	0.631
SLC48A1	0.23	1.7136	0.954541	0.541	0.404	0.348	0.19
SPOPL	0.23	1.7136	0.759272	0.604	0.504	0.413	0.258
YPEL3	0.23	1.7136	0.837678	0.631	0.508	0.477	0.286
BDH2	0.229	1.70615	0.543046	0.811	0.772	0.735	0.542
FAM20B	0.229	1.70615	0.794018	0.613	0.503	0.4	0.244
KDELR2	0.229	1.70615	0.498043	0.946	0.884	1.008	0.779
MBNL2	0.229	1.70615	0.885704	0.712	0.553	0.606	0.359
PEAK1	0.229	1.70615	0.751286	0.649	0.57	0.492	0.312
PPIB	0.229	1.70615	0.613112	0.892	0.793	0.861	0.617
RBCK1	0.229	1.70615	0.791728	0.55	0.503	0.401	0.245
TNNC1	0.229	1.70615	1.08166	0.604	0.37	0.437	0.223
COMT	0.228	1.6987	0.748923	0.649	0.58	0.515	0.328
COPB1	0.228	1.6987	0.428701	0.928	0.898	1.024	0.822
FAM63B	0.228	1.6987	0.752434	0.586	0.518	0.446	0.281
FKBP10	0.228	1.6987	0.691803	0.838	0.747	0.803	0.547
MAGI1	0.228	1.6987	0.996726	0.514	0.363	0.325	0.172
CYR61	0.227	1.69125	1.14494	0.586	0.406	0.681	0.348
PLOD3	0.227	1.69125	0.762353	0.64	0.532	0.432	0.27
ASH1L	0.226	1.6838	0.689311	0.73	0.619	0.577	0.384
FIS1	0.226	1.6838	0.648787	0.784	0.7	0.59	0.403
LOC100506548	0.226	1.6838	0.626644	0.73	0.696	0.649	0.452
MTMR6	0.226	1.6838	0.900779	0.658	0.49	0.443	0.254
ZBTB43	0.226	1.6838	0.867053	0.55	0.433	0.333	0.192
ARHGAP32	0.225	1.67635	0.711868	0.658	0.582	0.53	0.346
ARL1	0.225	1.67635	0.562768	0.757	0.705	0.596	0.429
BTG3	0.225	1.67635	0.712894	0.712	0.602	0.609	0.401
HIF3A	0.225	1.67635	0.769024	0.586	0.522	0.458	0.286
MAP4K5	0.225	1.67635	0.630031	0.712	0.68	0.581	0.401
PLXNB1	0.225	1.67635	0.828544	0.541	0.469	0.383	0.228
PTPN11	0.225	1.67635	0.415074	0.856	0.849	0.842	0.673
RARA	0.225	1.67635	1.16529	0.505	0.323	0.319	0.151
SLC30A7	0.225	1.67635	0.667982	0.631	0.571	0.457	0.304
SPOP	0.225	1.67635	0.649797	0.685	0.616	0.507	0.343
ZAK	0.225	1.67635	0.693168	0.802	0.69	0.679	0.456
BIVM	0.224	1.6689	0.83961	0.622	0.478	0.392	0.232
CACNB3	0.224	1.6689	0.800978	0.586	0.468	0.397	0.241
GPX8	0.224	1.6689	0.49084	0.847	0.806	0.795	0.607
RCOR3	0.224	1.6689	0.85121	0.541	0.458	0.377	0.221
SPECC1	0.224	1.6689	0.640945	0.721	0.658	0.586	0.402
ACAP2	0.223	1.66145	0.686313	0.595	0.568	0.462	0.304
ARPC1B	0.223	1.66145	0.664782	0.64	0.573	0.486	0.325
FBXL3	0.223	1.66145	0.704985	0.604	0.534	0.435	0.282
NNT	0.223	1.66145	0.663908	0.658	0.599	0.49	0.328
QPRT	0.223	1.66145	0.421693	0.865	0.853	0.858	0.684
SH3D19	0.223	1.66145	0.680392	0.604	0.566	0.469	0.31
UGP2	0.223	1.66145	0.543142	0.91	0.884	1.076	0.816
XRN1	0.223	1.66145	0.772919	0.541	0.494	0.421	0.261
ZMYND8	0.223	1.66145	0.535947	0.766	0.779	0.808	0.602
DCAF10	0.222	1.654	0.596039	0.784	0.693	0.602	0.425
DCUN1D4	0.222	1.654	0.677047	0.64	0.559	0.435	0.287
LAMP2	0.222	1.654	0.503197	0.874	0.793	0.733	0.553
LPP	0.222	1.654	0.538641	0.964	0.902	1.351	1.048
MON2	0.222	1.654	0.710864	0.658	0.557	0.46	0.298
RAB22A	0.222	1.654	0.893997	0.523	0.405	0.352	0.2
SLC39A10	0.222	1.654	0.521503	0.802	0.779	0.768	0.575
USP3	0.222	1.654	0.709308	0.64	0.554	0.442	0.286
NFATC4	0.221	1.64655	0.87594	0.613	0.454	0.43	0.25
NISCH	0.221	1.64655	0.455427	0.91	0.844	0.957	0.754
TRIP12	0.221	1.64655	0.419747	0.82	0.831	0.8	0.636
VPS39	0.221	1.64655	0.60379	0.685	0.656	0.529	0.369
ZBTB10	0.221	1.64655	0.908325	0.532	0.466	0.402	0.228
ABI1	0.22	1.6391	0.712871	0.649	0.549	0.44	0.284
BSDC1	0.22	1.6391	0.745228	0.523	0.468	0.364	0.228
BTBD6	0.22	1.6391	0.754441	0.559	0.462	0.343	0.213
DCAF6	0.22	1.6391	0.862671	0.613	0.458	0.404	0.236
GNB2	0.22	1.6391	0.558478	0.838	0.772	0.7	0.51
IRAK1	0.22	1.6391	0.82401	0.577	0.461	0.366	0.218
LRFN1	0.22	1.6391	0.866118	0.55	0.43	0.369	0.214
MPP5	0.22	1.6391	0.564523	0.694	0.691	0.615	0.443
TIMM17A	0.22	1.6391	0.632982	0.676	0.603	0.463	0.315
AKAP11	0.219	1.63165	0.724622	0.568	0.499	0.385	0.245
CERS6	0.219	1.63165	0.632677	0.667	0.619	0.495	0.338
GCA	0.219	1.63165	0.636586	0.667	0.624	0.535	0.366
PRKAB1	0.219	1.63165	0.861573	0.505	0.409	0.317	0.183
RHOQ	0.219	1.63165	0.630951	0.748	0.686	0.66	0.459
RPL7L1	0.219	1.63165	0.798434	0.577	0.458	0.354	0.214
TET2	0.219	1.63165	0.870214	0.559	0.437	0.365	0.211
XIAP	0.219	1.63165	0.503529	0.658	0.665	0.548	0.407
ZMYND11	0.219	1.63165	0.550688	0.802	0.778	0.747	0.549
ZNF580	0.219	1.63165	0.643497	0.748	0.644	0.551	0.376
AHDC1	0.218	1.6242	0.500354	0.694	0.666	0.529	0.393
CDC16	0.218	1.6242	0.442564	0.829	0.816	0.782	0.613
PAK2	0.218	1.6242	0.505663	0.676	0.662	0.484	0.357
PLXNA2	0.218	1.6242	0.877602	0.775	0.574	0.92	0.571
PPP3CB	0.218	1.6242	0.666841	0.775	0.655	0.578	0.39
PTPRK	0.218	1.6242	0.754153	0.667	0.582	0.571	0.365
RCOR1	0.218	1.6242	0.637819	0.514	0.504	0.378	0.254
TACC2	0.218	1.6242	0.838982	0.505	0.408	0.324	0.19
TBRG1	0.218	1.6242	0.852071	0.514	0.415	0.325	0.189
TMX4	0.218	1.6242	0.818714	0.55	0.45	0.368	0.22
UGGT2	0.218	1.6242	0.724979	0.559	0.469	0.358	0.227
ZNF148	0.218	1.6242	0.691722	0.595	0.567	0.449	0.294
APPBP2	0.217	1.61675	0.707301	0.784	0.627	0.563	0.37
ARHGAP1	0.217	1.61675	0.401871	0.793	0.837	0.809	0.65
BRWD1	0.217	1.61675	0.453285	0.838	0.813	0.818	0.639
CHD2	0.217	1.61675	0.577841	0.793	0.701	0.684	0.492
ITCH	0.217	1.61675	0.986783	0.523	0.367	0.323	0.172
MARCH5	0.217	1.61675	0.726764	0.694	0.582	0.504	0.325
MECP2	0.217	1.61675	0.603128	0.622	0.589	0.459	0.318
NCOA4	0.217	1.61675	0.460567	0.919	0.878	1.032	0.815
TCTN1	0.217	1.61675	0.673178	0.55	0.511	0.408	0.269
TMED7	0.217	1.61675	0.624316	0.829	0.705	0.609	0.423
TSC22D2	0.217	1.61675	0.889594	0.532	0.394	0.336	0.191
WASF3	0.217	1.61675	0.686244	0.64	0.56	0.485	0.32
ACTN1	0.216	1.6093	0.487964	0.955	0.948	1.599	1.291
BTG2	0.216	1.6093	0.916492	0.514	0.43	0.462	0.263
C19orf12	0.216	1.6093	0.706613	0.514	0.458	0.327	0.209
CRELD1	0.216	1.6093	0.808403	0.514	0.45	0.353	0.212
MDM4	0.216	1.6093	0.4551	0.793	0.778	0.671	0.518
RAP2C	0.216	1.6093	0.875789	0.541	0.418	0.358	0.206
RC3H1	0.216	1.6093	0.623318	0.532	0.515	0.369	0.25
TAGLN2	0.216	1.6093	0.802797	0.595	0.531	0.545	0.337
TNFRSF21	0.216	1.6093	0.77186	0.622	0.581	0.593	0.376
ALAD	0.215	1.60185	0.82165	0.622	0.472	0.402	0.241
EXOC7	0.215	1.60185	0.679835	0.613	0.557	0.414	0.272
FAM160B1	0.215	1.60185	0.763899	0.622	0.496	0.405	0.252
FAM168B	0.215	1.60185	0.500581	0.82	0.751	0.63	0.472
LONP2	0.215	1.60185	0.732169	0.523	0.469	0.352	0.222
MAP4K3	0.215	1.60185	0.745463	0.55	0.472	0.361	0.226
MYCN	0.215	1.60185	0.617328	0.739	0.732	1.098	0.802
RBM26	0.215	1.60185	0.427915	0.802	0.803	0.747	0.589
TCF12	0.215	1.60185	0.483138	0.793	0.754	0.674	0.512
TOB2	0.215	1.60185	0.573208	0.667	0.64	0.517	0.367
USP34	0.215	1.60185	0.474572	0.91	0.844	0.917	0.713
VEGFB	0.215	1.60185	0.716564	0.676	0.596	0.501	0.325
PRDM6	0.215	1.60185	1.01607	0.523	0.344	0.406	0.215
AGAP3	0.214	1.5944	0.741191	0.613	0.507	0.404	0.255
CCDC144B	0.214	1.5944	0.701456	0.667	0.595	0.511	0.335
CUL7	0.214	1.5944	0.731498	0.622	0.532	0.436	0.278
DNAJC10	0.214	1.5944	0.432079	0.883	0.887	0.941	0.75
ERCC-00009	0.214	1.5944	0.443225	0.991	0.968	1.54	1.265
LIMD2	0.214	1.5944	0.73991	0.73	0.552	0.502	0.321
PDCD6	0.214	1.5944	0.509449	0.757	0.718	0.591	0.439
PFKFB3	0.214	1.5944	0.673253	0.577	0.542	0.457	0.303
PHC3	0.214	1.5944	0.834088	0.505	0.43	0.336	0.198
PPIP5K2	0.214	1.5944	0.617849	0.694	0.615	0.51	0.352
SNX9	0.214	1.5944	0.64647	0.658	0.573	0.485	0.328
TMEM214	0.214	1.5944	0.580572	0.631	0.603	0.499	0.352
BAG5	0.213	1.58695	0.428759	0.468	0.501	0.312	0.238
DZIP1	0.213	1.58695	0.428165	0.739	0.747	0.672	0.527
ELP2	0.213	1.58695	0.528526	0.64	0.648	0.505	0.368
FAM13B	0.213	1.58695	0.869619	0.55	0.43	0.355	0.205
KIF1C	0.213	1.58695	0.69002	0.559	0.51	0.399	0.26
MYO9B	0.213	1.58695	0.760057	0.532	0.448	0.338	0.209
NPHP3	0.213	1.58695	0.687439	0.604	0.536	0.429	0.281
PHLDA1	0.213	1.58695	0.89816	0.568	0.457	0.582	0.341
UBN1	0.213	1.58695	0.596815	0.568	0.554	0.409	0.283
ARL8A	0.212	1.5795	0.765459	0.595	0.479	0.387	0.24
DENND5A	0.212	1.5795	0.551202	0.802	0.751	0.674	0.492
ETNK1	0.212	1.5795	0.475036	0.802	0.753	0.666	0.508
FAM65A	0.212	1.5795	0.76176	0.739	0.536	0.547	0.347
GBF1	0.212	1.5795	0.680877	0.541	0.492	0.344	0.224
GPC1	0.212	1.5795	0.713321	0.613	0.535	0.446	0.288
RRAGC	0.212	1.5795	0.624134	0.658	0.587	0.455	0.311
STX3	0.212	1.5795	0.592427	0.532	0.538	0.401	0.278
FAHD1	0.211	1.57205	0.6736	0.595	0.534	0.411	0.271
GAB1	0.211	1.57205	0.746694	0.55	0.476	0.375	0.235
IBTK	0.211	1.57205	0.622474	0.694	0.617	0.51	0.351
SCRN1	0.211	1.57205	0.433988	0.955	0.905	1.127	0.908
SEL1L	0.211	1.57205	0.563538	0.766	0.69	0.633	0.457
SPCS3	0.211	1.57205	0.440753	0.802	0.803	0.734	0.574
VPS13B	0.211	1.57205	0.844496	0.532	0.427	0.369	0.217
WWC2	0.211	1.57205	0.74841	0.532	0.444	0.354	0.221
ARHGEF17	0.21	1.56459	0.657638	0.595	0.532	0.397	0.264
COMMD6	0.21	1.56459	0.511336	0.766	0.739	0.644	0.48
DUSP3	0.21	1.56459	0.690012	0.658	0.573	0.499	0.329
EIF4G3	0.21	1.56459	0.468181	0.811	0.764	0.745	0.574
KIAA1522	0.21	1.56459	0.646547	0.676	0.609	0.52	0.353
POLK	0.21	1.56459	0.811858	0.532	0.429	0.341	0.204
RBM20	0.21	1.56459	0.669545	0.505	0.464	0.365	0.24
TM2D2	0.21	1.56459	0.532277	0.667	0.644	0.489	0.355
ZNF281	0.21	1.56459	0.596661	0.694	0.61	0.501	0.35
BDP1	0.209	1.55714	0.535205	0.712	0.645	0.562	0.41
CCNL1	0.209	1.55714	0.583595	0.694	0.655	0.543	0.384
CD46	0.209	1.55714	0.670569	0.64	0.549	0.429	0.284
CEP170	0.209	1.55714	0.449392	0.865	0.83	0.832	0.652
CSPP1	0.209	1.55714	0.538475	0.595	0.574	0.439	0.316
GOLGA4	0.209	1.55714	0.454562	0.838	0.817	0.916	0.72
H2AFJ	0.209	1.55714	0.868281	0.514	0.374	0.315	0.181
IRF2BPL	0.209	1.55714	0.679726	0.658	0.574	0.496	0.329
KLF3	0.209	1.55714	0.710603	0.505	0.492	0.404	0.26
NENF	0.209	1.55714	0.716006	0.505	0.479	0.38	0.243
SSBP4	0.209	1.55714	0.690904	0.658	0.535	0.408	0.266
UFM1	0.209	1.55714	0.623334	0.712	0.628	0.546	0.377
ZC3H7A	0.209	1.55714	0.633513	0.514	0.522	0.404	0.273
ZNF532	0.209	1.55714	0.464264	0.685	0.736	0.586	0.447
LRRN4	0.209	1.55714	0.967276	0.523	0.317	0.389	0.212
CNN3	0.208	1.54969	0.505871	0.919	0.832	0.944	0.723
FAM208B	0.208	1.54969	0.664333	0.622	0.545	0.436	0.29
FBXO11	0.208	1.54969	0.454605	0.658	0.701	0.594	0.456
IFNAR1	0.208	1.54969	0.76045	0.586	0.49	0.395	0.246
NCK2	0.208	1.54969	0.598689	0.622	0.624	0.477	0.332
SETD2	0.208	1.54969	0.512268	0.793	0.743	0.69	0.516
SPPL3	0.208	1.54969	0.484795	0.577	0.601	0.429	0.319
TXNIP	0.208	1.54969	0.597405	0.892	0.813	1.202	0.895
UBR3	0.208	1.54969	0.604141	0.631	0.584	0.451	0.312
ZFAND3	0.208	1.54969	0.579452	0.739	0.649	0.535	0.379
ZFP91	0.208	1.54969	0.502665	0.577	0.603	0.431	0.317
BET1L	0.207	1.54224	0.754441	0.568	0.462	0.343	0.213
BTBD7	0.207	1.54224	0.530275	0.649	0.62	0.466	0.338
CHD9	0.207	1.54224	0.438718	0.865	0.856	0.943	0.749
GNB5	0.207	1.54224	0.757887	0.541	0.453	0.336	0.208
NCDN	0.207	1.54224	0.738238	0.55	0.441	0.335	0.21
PYCR1	0.207	1.54224	0.670012	0.577	0.511	0.413	0.273
RNF41	0.207	1.54224	0.478421	0.667	0.665	0.507	0.381
RRAGA	0.207	1.54224	0.44101	0.775	0.747	0.64	0.497
VCL	0.207	1.54224	0.469464	0.901	0.892	1.227	0.977
ZBED4	0.207	1.54224	0.465649	0.477	0.524	0.344	0.257
ACTR1B	0.206	1.53479	0.468469	0.568	0.631	0.462	0.348
C5orf42	0.206	1.53479	0.617543	0.577	0.525	0.456	0.313
DCTN6	0.206	1.53479	0.530452	0.73	0.665	0.537	0.392
DEGS1	0.206	1.53479	0.571842	0.775	0.705	0.653	0.47
FAM208A	0.206	1.53479	0.572991	0.694	0.659	0.565	0.403
GTF2H1	0.206	1.53479	0.707349	0.568	0.48	0.378	0.243
MKRN2	0.206	1.53479	0.674906	0.577	0.501	0.391	0.257
NIN	0.206	1.53479	0.681706	0.667	0.563	0.488	0.323
SEC16A	0.206	1.53479	0.497564	0.757	0.697	0.532	0.396
SGCB	0.206	1.53479	0.688899	0.586	0.506	0.387	0.252
UBE2B	0.206	1.53479	0.477739	0.802	0.768	0.667	0.508
ZNF146	0.206	1.53479	0.493427	0.748	0.691	0.578	0.433
ALDH18A1	0.205	1.52734	0.553547	0.604	0.605	0.447	0.319
APC	0.205	1.52734	0.649969	0.586	0.525	0.428	0.287
ATG2B	0.205	1.52734	0.751543	0.559	0.472	0.37	0.231
EDEM3	0.205	1.52734	0.556688	0.568	0.582	0.472	0.337
ERCC-00060	0.205	1.52734	0.423452	0.973	0.976	1.331	1.091
GAPVD1	0.205	1.52734	0.613745	0.622	0.534	0.402	0.275
PPRC1	0.205	1.52734	0.685253	0.523	0.487	0.392	0.256
STK39	0.205	1.52734	0.725062	0.568	0.476	0.415	0.265
ATXN2	0.204	1.51989	0.429035	0.892	0.841	0.923	0.736
EMC10	0.204	1.51989	0.423466	0.829	0.809	0.744	0.588
NCOA1	0.204	1.51989	0.493154	0.748	0.69	0.583	0.437
RAP1A	0.204	1.51989	0.52809	0.703	0.683	0.596	0.438
RNF216	0.204	1.51989	0.47457	0.559	0.575	0.407	0.304
ARMCX6	0.203	1.51244	0.514493	0.775	0.729	0.626	0.465
ATP6V1C1	0.203	1.51244	0.481291	0.477	0.507	0.325	0.24
BOD1L1	0.203	1.51244	0.440652	0.757	0.728	0.684	0.533
CHMP1A	0.203	1.51244	0.52665	0.649	0.564	0.396	0.286
HEXA	0.203	1.51244	0.594017	0.64	0.557	0.4	0.277
PACS2	0.203	1.51244	0.524344	0.658	0.62	0.467	0.34
PRSS23	0.203	1.51244	0.890264	0.568	0.447	0.551	0.323
RCBTB2	0.203	1.51244	0.681045	0.541	0.478	0.391	0.256
SLC25A4	0.203	1.51244	0.556675	0.649	0.628	0.524	0.376
ZDHHC20	0.203	1.51244	0.504096	0.613	0.612	0.413	0.303
ASPH	0.202	1.50499	0.462075	0.757	0.729	0.614	0.47
BACH1	0.202	1.50499	0.574753	0.622	0.55	0.42	0.295
FGD5-AS1	0.202	1.50499	0.500907	0.766	0.701	0.56	0.417
ITGB1BP1	0.202	1.50499	0.511612	0.775	0.732	0.653	0.487
LARP4B	0.202	1.50499	0.459919	0.631	0.654	0.48	0.364
NUMA1	0.202	1.50499	0.572448	0.532	0.506	0.33	0.23
PCBP4	0.202	1.50499	0.70922	0.523	0.478	0.368	0.236
SMARCC2	0.202	1.50499	0.464223	0.757	0.733	0.611	0.467
SREK1	0.202	1.50499	0.431476	0.847	0.803	0.811	0.641
TAGLN	0.202	1.50499	0.618696	0.883	0.848	2.092	1.644
TMEM30A	0.202	1.50499	0.434861	0.766	0.774	0.694	0.543
TP53RK	0.202	1.50499	0.640959	0.604	0.518	0.373	0.25
UBE2W	0.202	1.50499	0.506046	0.595	0.588	0.424	0.311
WSB2	0.202	1.50499	0.608788	0.586	0.531	0.398	0.273
ZDBF2	0.202	1.50499	0.739195	0.505	0.439	0.352	0.221
ACADVL	0.201	1.49754	0.438946	0.811	0.788	0.698	0.545
ERCC-00043	0.201	1.49754	0.463671	0.901	0.846	0.831	0.646
SEC14L1	0.201	1.49754	0.455223	0.766	0.75	0.655	0.505
SLC2A4RG	0.201	1.49754	0.498258	0.64	0.619	0.439	0.324
SOS1	0.201	1.49754	0.473335	0.685	0.693	0.584	0.443
TOR1AIP2	0.201	1.49754	0.492998	0.802	0.735	0.621	0.467
ZBTB8A	0.201	1.49754	0.627501	0.541	0.532	0.411	0.279
ZNF579	0.201	1.49754	0.612059	0.55	0.511	0.358	0.244
DAPK1	0.2	1.49009	0.689451	0.613	0.497	0.393	0.256
DDX56	0.2	1.49009	0.644371	0.55	0.483	0.345	0.23
DOCK7	0.2	1.49009	0.462643	0.721	0.677	0.515	0.391
EEA1	0.2	1.49009	0.600651	0.468	0.507	0.403	0.278
GATAD2B	0.2	1.49009	0.42194	0.685	0.682	0.519	0.404
LATS2	0.2	1.49009	0.625548	0.613	0.57	0.486	0.333
MAVS	0.2	1.49009	0.406386	0.766	0.756	0.618	0.489
PALLD	0.2	1.49009	0.415764	0.883	0.887	1.079	0.875
TBC1D16	0.2	1.49009	0.661307	0.631	0.499	0.395	0.262
TMEM165	0.2	1.49009	0.486628	0.739	0.652	0.512	0.383
CDC73	0.199	1.48264	0.466064	0.631	0.612	0.446	0.336
CFL2	0.199	1.48264	0.40074	0.847	0.83	0.851	0.686
CHMP2B	0.199	1.48264	0.511021	0.613	0.582	0.42	0.307
CRK	0.199	1.48264	0.525579	0.712	0.675	0.542	0.397
DTX3	0.199	1.48264	0.501254	0.73	0.698	0.615	0.46
FNBP1	0.199	1.48264	0.581397	0.658	0.591	0.464	0.326
FZD8	0.199	1.48264	0.660969	0.64	0.585	0.537	0.362
IGF2R	0.199	1.48264	0.501779	0.595	0.613	0.479	0.354
NEXN	0.199	1.48264	0.496481	0.73	0.665	0.607	0.455
RLIM	0.199	1.48264	0.449233	0.712	0.721	0.581	0.447
SNHG8	0.199	1.48264	0.56243	0.631	0.585	0.483	0.344
TMEM47	0.199	1.48264	0.643651	0.667	0.56	0.494	0.335
TSPAN13	0.199	1.48264	0.624259	0.505	0.468	0.355	0.24
ZNF277	0.199	1.48264	0.599466	0.73	0.624	0.495	0.345
BAG3	0.198	1.47519	0.533555	0.477	0.515	0.399	0.287
C6orf89	0.198	1.47519	0.644606	0.595	0.494	0.381	0.255
CSNK1G3	0.198	1.47519	0.530648	0.685	0.642	0.503	0.366
FKBP7	0.198	1.47519	0.619359	0.604	0.531	0.416	0.284
FXYD5	0.198	1.47519	0.5614	0.595	0.57	0.441	0.313
GUCD1	0.198	1.47519	0.615185	0.541	0.487	0.336	0.228
H6PD	0.198	1.47519	0.709176	0.514	0.42	0.323	0.206
LRP1	0.198	1.47519	0.476145	0.73	0.686	0.566	0.428
PREPL	0.198	1.47519	0.483876	0.685	0.687	0.552	0.415
RRP9	0.198	1.47519	0.615362	0.523	0.529	0.415	0.284
SMYD2	0.198	1.47519	0.552056	0.568	0.557	0.417	0.297
SORT1	0.198	1.47519	0.558929	0.676	0.608	0.53	0.38
STAM2	0.198	1.47519	0.697726	0.559	0.468	0.358	0.231
THAP9-AS1	0.198	1.47519	0.462385	0.676	0.662	0.501	0.38
UBE4A	0.198	1.47519	0.45988	0.685	0.669	0.499	0.379
XAF1	0.198	1.47519	0.586813	0.595	0.539	0.445	0.311
ZSCAN18	0.198	1.47519	0.554291	0.757	0.624	0.51	0.366
GPRC5C	0.197	1.46774	0.560004	0.532	0.531	0.4	0.283
NR2F2	0.197	1.46774	0.62754	0.901	0.726	1.182	0.865
NR3C1	0.197	1.46774	0.831104	0.505	0.401	0.382	0.227
SIKE1	0.197	1.46774	0.426063	0.658	0.637	0.448	0.346
SIN3B	0.197	1.46774	0.574376	0.649	0.571	0.424	0.298
TMCO3	0.197	1.46774	0.553374	0.523	0.482	0.322	0.227
TP53BP2	0.197	1.46774	0.504413	0.631	0.598	0.438	0.322
CTTNBP2NL	0.196	1.46029	0.490019	0.64	0.619	0.455	0.338
EFR3A	0.196	1.46029	0.564875	0.577	0.513	0.367	0.258
ELAC2	0.196	1.46029	0.441073	0.595	0.62	0.409	0.312
FAM214A	0.196	1.46029	0.728358	0.532	0.409	0.336	0.212
HCG18	0.196	1.46029	0.634673	0.541	0.478	0.363	0.244
KLHL9	0.196	1.46029	0.507756	0.694	0.655	0.495	0.365
NUPL2	0.196	1.46029	0.446306	0.55	0.578	0.372	0.282
PRKD3	0.196	1.46029	0.444775	0.586	0.592	0.415	0.316
RABGGTB	0.196	1.46029	0.499545	0.676	0.67	0.557	0.415
SCP2	0.196	1.46029	0.491529	0.658	0.641	0.458	0.34
SMAD3	0.196	1.46029	0.535928	0.613	0.564	0.437	0.315
VPS26B	0.196	1.46029	0.507756	0.685	0.64	0.495	0.365
YIPF4	0.196	1.46029	0.628098	0.505	0.444	0.297	0.199
ZNF37BP	0.196	1.46029	0.487473	0.541	0.559	0.388	0.287
AGGF1	0.195	1.45284	0.469735	0.586	0.566	0.429	0.322
CREBZF	0.195	1.45284	0.450357	0.694	0.683	0.5	0.382
ERC1	0.195	1.45284	0.527704	0.667	0.617	0.51	0.372
LRRC41	0.195	1.45284	0.42194	0.676	0.68	0.519	0.404
NDFIP2	0.195	1.45284	0.561311	0.505	0.496	0.347	0.244
PPM1K	0.195	1.45284	0.604519	0.55	0.476	0.383	0.263
RNF4	0.195	1.45284	0.537807	0.64	0.574	0.396	0.284
TBL2	0.195	1.45284	0.61338	0.523	0.447	0.31	0.21
ATP11B	0.194	1.44539	0.609978	0.586	0.506	0.366	0.25
BAD	0.194	1.44539	0.606069	0.505	0.49	0.344	0.235
GPSM1	0.194	1.44539	0.600688	0.559	0.486	0.333	0.228
SNAP23	0.194	1.44539	0.427797	0.748	0.698	0.569	0.443
TFE3	0.194	1.44539	0.51453	0.658	0.617	0.48	0.352
WDR13	0.194	1.44539	0.65165	0.514	0.479	0.348	0.231
ZDHHC17	0.194	1.44539	0.512556	0.703	0.635	0.499	0.367
ZNF529	0.194	1.44539	0.409978	0.505	0.567	0.35	0.271
DPY19L3	0.193	1.43794	0.465312	0.586	0.568	0.397	0.298
FBRS	0.193	1.43794	0.567275	0.568	0.499	0.34	0.238
FBXW11	0.193	1.43794	0.508846	0.685	0.623	0.481	0.354
INPPL1	0.193	1.43794	0.551894	0.685	0.615	0.472	0.338
LTV1	0.193	1.43794	0.406869	0.613	0.652	0.48	0.376
MED25	0.193	1.43794	0.479084	0.604	0.575	0.412	0.307
NCK1	0.193	1.43794	0.614867	0.514	0.434	0.306	0.207
SECISBP2L	0.193	1.43794	0.612113	0.613	0.514	0.396	0.271
TPD52L2	0.193	1.43794	0.4384	0.577	0.605	0.402	0.307
USP42	0.193	1.43794	0.635549	0.505	0.455	0.346	0.232
CLPP	0.192	1.43049	0.58309	0.586	0.563	0.407	0.284
GABPA	0.192	1.43049	0.615501	0.541	0.469	0.363	0.247
MAP9	0.192	1.43049	0.482339	0.568	0.553	0.418	0.311
MGA	0.192	1.43049	0.673676	0.55	0.453	0.363	0.238
P4HA1	0.192	1.43049	0.484715	0.613	0.588	0.416	0.309
RBM22	0.192	1.43049	0.425905	0.73	0.714	0.577	0.45
STXBP1	0.192	1.43049	0.679824	0.514	0.476	0.398	0.261
ZNF326	0.192	1.43049	0.508846	0.658	0.605	0.481	0.354
ATXN7L3	0.191	1.42304	0.412048	0.658	0.642	0.448	0.349
BICD2	0.191	1.42304	0.592167	0.586	0.531	0.412	0.286
BRD3	0.191	1.42304	0.425854	0.784	0.716	0.604	0.472
CHKA	0.191	1.42304	0.478227	0.703	0.682	0.573	0.433
ERCC-00076	0.191	1.42304	0.541874	0.712	0.651	0.572	0.416
FAM8A1	0.191	1.42304	0.544254	0.577	0.514	0.38	0.271
GOPC	0.191	1.42304	0.482735	0.739	0.656	0.507	0.38
HEXIM1	0.191	1.42304	0.567298	0.595	0.52	0.384	0.27
MAPRE2	0.191	1.42304	0.449775	0.649	0.697	0.55	0.422
MBTD1	0.191	1.42304	0.490094	0.595	0.546	0.386	0.285
NUDT9	0.191	1.42304	0.562962	0.514	0.459	0.299	0.209
ORAI2	0.191	1.42304	0.599317	0.559	0.489	0.351	0.241
PATL1	0.191	1.42304	0.545066	0.505	0.51	0.368	0.262
PCDH18	0.191	1.42304	0.580475	0.514	0.58	0.538	0.381
SNX24	0.191	1.42304	0.504655	0.568	0.521	0.359	0.262
VPS53	0.191	1.42304	0.470188	0.685	0.649	0.516	0.39
ZNF292	0.191	1.42304	0.412447	0.748	0.728	0.671	0.531
ZNF608	0.191	1.42304	0.54595	0.622	0.553	0.477	0.343
ZNF91	0.191	1.42304	0.434501	0.712	0.677	0.534	0.413
HAND2	0.191	1.42304	0.516303	0.775	0.679	0.971	0.741
BTG1	0.19	1.41559	0.418369	0.694	0.682	0.599	0.47
CAMSAP1	0.19	1.41559	0.461944	0.64	0.598	0.427	0.322
CDK13	0.19	1.41559	0.497447	0.631	0.599	0.444	0.328
CERS2	0.19	1.41559	0.504452	0.73	0.647	0.507	0.375
COG6	0.19	1.41559	0.585373	0.505	0.497	0.348	0.241
HK1	0.19	1.41559	0.477358	0.856	0.725	0.693	0.529
OAZ2	0.19	1.41559	0.406381	0.847	0.788	0.688	0.547
TSC22D4	0.19	1.41559	0.497282	0.604	0.58	0.427	0.315
TSPYL5	0.19	1.41559	0.54936	0.514	0.483	0.354	0.251
VOPP1	0.19	1.41559	0.531693	0.505	0.513	0.365	0.262
ANXA3	0.189	1.40814	0.653956	0.649	0.513	0.724	0.5
CDK14	0.189	1.40814	0.408599	0.739	0.722	0.643	0.509
FRS2	0.189	1.40814	0.530701	0.649	0.557	0.409	0.295
GABARAPL1	0.189	1.40814	0.622206	0.559	0.501	0.373	0.253
IER2	0.189	1.40814	0.675724	0.532	0.543	0.472	0.313
KDM2A	0.189	1.40814	0.52193	0.658	0.577	0.436	0.317
KIFAP3	0.189	1.40814	0.554855	0.604	0.513	0.415	0.295
MIER3	0.189	1.40814	0.477434	0.568	0.573	0.409	0.305
SOCS4	0.189	1.40814	0.583222	0.505	0.483	0.335	0.232
ST7	0.189	1.40814	0.539463	0.667	0.559	0.499	0.361
TNFRSF12A	0.189	1.40814	0.763776	0.505	0.324	0.382	0.237
C11orf95	0.188	1.40068	0.536928	0.604	0.511	0.381	0.273
CENPB	0.188	1.40068	0.425891	0.73	0.68	0.54	0.42
FNIP1	0.188	1.40068	0.576983	0.514	0.453	0.317	0.22
FOXP4	0.188	1.40068	0.44253	0.748	0.729	0.627	0.486
GCC2	0.188	1.40068	0.470737	0.694	0.655	0.612	0.466
HERC4	0.188	1.40068	0.533895	0.523	0.501	0.352	0.252
HINT3	0.188	1.40068	0.427882	0.64	0.616	0.456	0.352
KANSL1	0.188	1.40068	0.536055	0.595	0.55	0.413	0.297
MBOAT2	0.188	1.40068	0.571582	0.586	0.52	0.363	0.254
PHF21A	0.188	1.40068	0.559523	0.568	0.518	0.389	0.275
SLC39A14	0.188	1.40068	0.585601	0.577	0.517	0.42	0.293
VPS4B	0.188	1.40068	0.408358	0.604	0.606	0.396	0.308
XPNPEP1	0.188	1.40068	0.400837	0.712	0.696	0.52	0.41
ATG14	0.187	1.39323	0.572448	0.532	0.478	0.33	0.23
EVA1B	0.187	1.39323	0.565703	0.541	0.52	0.415	0.293
RNASET2	0.187	1.39323	0.607402	0.505	0.432	0.306	0.208
SLC26A2	0.187	1.39323	0.47766	0.676	0.599	0.494	0.371
TIGD1	0.187	1.39323	0.450007	0.577	0.527	0.351	0.265
TM2D3	0.187	1.39323	0.544507	0.586	0.536	0.376	0.268
TMEM184B	0.187	1.39323	0.448446	0.559	0.591	0.407	0.309
CLINT1	0.186	1.38578	0.417818	0.829	0.763	0.673	0.531
FAM91A1	0.186	1.38578	0.409257	0.486	0.517	0.336	0.26
GLT8D1	0.186	1.38578	0.460561	0.577	0.564	0.392	0.295
GPR161	0.186	1.38578	0.4465	0.559	0.567	0.381	0.289
HDAC7	0.186	1.38578	0.433277	0.73	0.669	0.505	0.39
KIAA1033	0.186	1.38578	0.582045	0.505	0.447	0.318	0.22
KLHL20	0.186	1.38578	0.474696	0.523	0.515	0.372	0.277
PPP1R18	0.186	1.38578	0.454504	0.64	0.624	0.505	0.385
TBC1D20	0.186	1.38578	0.522536	0.586	0.543	0.375	0.271
ERCC-00131	0.185	1.37833	0.68666	0.532	0.415	0.32	0.207
PKN2	0.185	1.37833	0.452082	0.523	0.489	0.301	0.226
SEMA5A	0.185	1.37833	0.587049	0.685	0.582	0.648	0.462
SUPT20H	0.185	1.37833	0.4836	0.595	0.56	0.391	0.29
DIXDC1	0.184	1.37088	0.561861	0.541	0.522	0.38	0.268
GALNT7	0.184	1.37088	0.452671	0.649	0.591	0.431	0.327
LYRM2	0.184	1.37088	0.435674	0.595	0.57	0.395	0.302
RND3	0.184	1.37088	0.664839	0.541	0.447	0.459	0.306
STT3A	0.184	1.37088	0.436079	0.505	0.501	0.298	0.226
RPS6KB1	0.183	1.36343	0.537158	0.541	0.518	0.35	0.25
ST5	0.183	1.36343	0.488646	0.55	0.52	0.366	0.27
ZNF197	0.183	1.36343	0.410735	0.477	0.501	0.33	0.255
ZNF428	0.183	1.36343	0.535266	0.577	0.49	0.355	0.254
TBX5	0.183	1.36343	0.598899	0.703	0.546	0.643	0.455
CSAD	0.182	1.35598	0.510653	0.514	0.493	0.351	0.255
NIPSNAP3A	0.182	1.35598	0.542194	0.523	0.49	0.366	0.261
PRDM2	0.182	1.35598	0.487143	0.64	0.546	0.384	0.284
RHOT1	0.182	1.35598	0.438352	0.739	0.666	0.509	0.392
ZNF621	0.182	1.35598	0.401984	0.658	0.656	0.47	0.369
CAPN1	0.181	1.34853	0.428094	0.667	0.601	0.436	0.336
CIC	0.181	1.34853	0.437601	0.577	0.58	0.398	0.304
ERLEC1	0.181	1.34853	0.448915	0.622	0.574	0.379	0.287
KDSR	0.181	1.34853	0.448708	0.577	0.553	0.361	0.273
MBD2	0.181	1.34853	0.538508	0.595	0.515	0.353	0.252
MOB1B	0.181	1.34853	0.471205	0.55	0.507	0.353	0.263
PWWP2A	0.181	1.34853	0.41352	0.622	0.587	0.411	0.319
SRPRB	0.181	1.34853	0.50912	0.595	0.487	0.336	0.244
TMEM242	0.181	1.34853	0.43698	0.495	0.518	0.329	0.25
TUBGCP2	0.181	1.34853	0.427331	0.486	0.504	0.313	0.239
CYP20A1	0.18	1.34108	0.432104	0.622	0.589	0.403	0.309
ERCC-00022	0.18	1.34108	0.442521	0.73	0.668	0.524	0.403
FBXO38	0.18	1.34108	0.488208	0.532	0.494	0.333	0.245
LDOC1	0.18	1.34108	0.416929	0.883	0.804	0.922	0.74
PDXK	0.18	1.34108	0.526416	0.523	0.486	0.345	0.248
RYR2	0.18	1.34108	0.502884	0.658	0.56	0.513	0.38
TSTA3	0.18	1.34108	0.432352	0.495	0.513	0.337	0.257
ZHX1	0.18	1.34108	0.45936	0.541	0.532	0.393	0.296
C1orf63	0.179	1.33363	0.503567	0.315	0.584	0.486	0.359
CEP95	0.179	1.33363	0.514369	0.523	0.478	0.321	0.232
EXTL3	0.179	1.33363	0.443546	0.685	0.605	0.459	0.351
FBXL20	0.179	1.33363	0.576776	0.514	0.45	0.342	0.238
PFKP	0.179	1.33363	0.402513	0.73	0.732	0.84	0.676
PLXNA1	0.179	1.33363	0.449309	0.595	0.554	0.397	0.301
SPATA20	0.179	1.33363	0.494896	0.541	0.497	0.341	0.25
TUBB3	0.179	1.33363	0.594206	0.55	0.483	0.503	0.352
ADAM19	0.178	1.32618	0.440889	0.613	0.623	0.526	0.405
AP1G2	0.178	1.32618	0.477434	0.613	0.575	0.409	0.305
EFCAB14	0.178	1.32618	0.451947	0.55	0.541	0.372	0.281
FBXO21	0.178	1.32618	0.400259	0.55	0.589	0.404	0.316
PPP1R12C	0.178	1.32618	0.430198	0.523	0.5	0.311	0.237
RAB5C	0.178	1.32618	0.446451	0.649	0.602	0.456	0.348
RING1	0.178	1.32618	0.451947	0.613	0.553	0.372	0.281
RNF40	0.178	1.32618	0.407242	0.622	0.61	0.443	0.346
ACSL4	0.177	1.31873	0.479096	0.541	0.503	0.339	0.251
CD99L2	0.177	1.31873	0.438129	0.514	0.513	0.351	0.267
NES	0.177	1.31873	0.473697	0.784	0.742	0.919	0.715
RBMS2	0.177	1.31873	0.569119	0.523	0.401	0.289	0.201
TM9SF1	0.177	1.31873	0.437926	0.568	0.571	0.393	0.3
TMEM39A	0.177	1.31873	0.548368	0.532	0.466	0.321	0.227
UBXN7	0.177	1.31873	0.458849	0.649	0.619	0.467	0.354
VPS13C	0.177	1.31873	0.414604	0.55	0.584	0.43	0.334
C11orf68	0.176	1.31128	0.453296	0.541	0.527	0.353	0.266
FAM134A	0.176	1.31128	0.435162	0.667	0.602	0.463	0.356
PYGB	0.176	1.31128	0.430171	0.595	0.539	0.362	0.277
USP16	0.176	1.31128	0.430463	0.604	0.578	0.419	0.322
ABCD4	0.175	1.30383	0.416608	0.523	0.513	0.335	0.258
CES2	0.175	1.30383	0.411569	0.586	0.549	0.383	0.297
GALNT11	0.175	1.30383	0.462787	0.559	0.511	0.333	0.249
PRKAG1	0.175	1.30383	0.40801	0.514	0.522	0.337	0.261
RCBTB1	0.175	1.30383	0.444119	0.532	0.496	0.315	0.238
DNPEP	0.174	1.29638	0.46936	0.595	0.508	0.363	0.271
UROS	0.174	1.29638	0.462787	0.532	0.496	0.333	0.249
ALG2	0.173	1.28893	0.408668	0.568	0.542	0.356	0.276
NRP2	0.173	1.28893	0.533894	0.559	0.464	0.467	0.338
POFUT2	0.173	1.28893	0.420759	0.559	0.543	0.346	0.266
ABCC5	0.172	1.28148	0.423553	0.559	0.52	0.325	0.249
RNF14	0.172	1.28148	0.464809	0.514	0.448	0.289	0.215
CLTB	0.171	1.27403	0.406337	0.631	0.616	0.444	0.347
MAPK9	0.171	1.27403	0.468099	0.622	0.578	0.435	0.327
PAWR	0.171	1.27403	0.436216	0.532	0.479	0.325	0.247
TECRL	0.17	1.26658	0.407733	0.919	0.645	1.705	1.435
DAB2IP	0.169	1.25913	0.405805	0.658	0.615	0.455	0.356
SLC12A2	0.169	1.25913	0.590206	0.441	0.518	0.388	0.269
SLC41A3	0.168	1.25168	0.452235	0.532	0.517	0.336	0.253
FMNL2	0.166	1.23677	0.407313	0.505	0.469	0.323	0.25
ANKRD52	0.164	1.22187	0.43264	0.532	0.489	0.323	0.246

## Sheet: GO terms seg2 > seg1
GO term analysis: epicardial segment 2 > common progenitor segment 1
Analysis Type:	PANTHER Overrepresentation Test (Released 20210224)
Annotation Version and Release Date:	GO Ontology database DOI: 10.5281/zenodo.4495804 Released 2021-02-01
Analyzed List:	upload_1 (Homo sapiens)
Reference List:	Homo sapiens (all genes in database)
Test Type:	FISHER
Correction:	FDR
GO biological process complete	Homo sapiens - REFLIST (20595)	upload_1 (1313)	upload_1 (expected)	upload_1 (over/under)	upload_1 (fold Enrichment)	upload_1 (raw P-value)	upload_1 (FDR)
negative regulation of cellular process (GO:0048523)	4909	477	312.97	+	1.52	1.3e-22	2.05e-18
regulation of cellular process (GO:0050794)	11302	897	720.54	+	1.24	6.64e-22	5.24e-18
positive regulation of cellular process (GO:0048522)	5656	524	360.59	+	1.45	4.73e-21	2.49e-17
biological regulation (GO:0065007)	12571	967	801.44	+	1.21	1.06e-20	4.18e-17
regulation of biological process (GO:0050789)	11856	924	755.86	+	1.22	1.68e-20	4.41e-17
anatomical structure morphogenesis (GO:0009653)	2135	254	136.11	+	1.87	1.5e-20	4.73e-17
anatomical structure development (GO:0048856)	5266	491	335.73	+	1.46	8.45e-20	1.48e-16
developmental process (GO:0032502)	5729	524	365.24	+	1.43	7.17e-20	1.61e-16
system development (GO:0048731)	4279	419	272.8	+	1.54	8.26e-20	1.63e-16
cellular component organization (GO:0016043)	5775	526	368.18	+	1.43	1.54e-19	2.42e-16
regulation of cellular component organization (GO:0051128)	2360	268	150.46	+	1.78	2.61e-19	3.75e-16
negative regulation of biological process (GO:0048519)	5541	508	353.26	+	1.44	3.16e-19	4.16e-16
multicellular organism development (GO:0007275)	4877	460	310.93	+	1.48	3.95e-19	4.46e-16
regulation of developmental process (GO:0050793)	2441	274	155.62	+	1.76	3.83e-19	4.64e-16
cellular component organization or biogenesis (GO:0071840)	5999	535	382.46	+	1.4	3.67e-18	3.86e-15
regulation of cell communication (GO:0010646)	3424	347	218.29	+	1.59	6.68e-18	6.59e-15
regulation of signaling (GO:0023051)	3459	349	220.52	+	1.58	9e-18	8.35e-15
supramolecular fiber organization (GO:0097435)	597	104	38.06	+	2.73	9.64e-18	8.45e-15
cellular process (GO:0009987)	15487	1118	987.35	+	1.13	1.22e-17	1.01e-14
positive regulation of biological process (GO:0048518)	6244	549	398.08	+	1.38	1.87e-17	1.48e-14
extracellular matrix organization (GO:0030198)	382	78	24.35	+	3.2	5.46e-17	4.1e-14
extracellular structure organization (GO:0043062)	383	78	24.42	+	3.19	6.2e-17	4.44e-14
Unclassified (UNCLASSIFIED)	2745	79	175	-	0.45	6.87e-17	4.51e-14
biological_process (GO:0008150)	17850	1234	1138	+	1.08	6.87e-17	4.71e-14
external encapsulating structure organization (GO:0045229)	385	78	24.55	+	3.18	7.98e-17	5.04e-14
regulation of signal transduction (GO:0009966)	3047	311	194.26	+	1.6	2.54e-16	1.54e-13
circulatory system development (GO:0072359)	853	126	54.38	+	2.32	2.81e-16	1.64e-13
nervous system development (GO:0007399)	2189	239	139.56	+	1.71	2.63e-15	1.48e-12
cell adhesion (GO:0007155)	951	132	60.63	+	2.18	3.21e-15	1.75e-12
biological adhesion (GO:0022610)	957	132	61.01	+	2.16	5.87e-15	3.09e-12
cell development (GO:0048468)	1615	190	102.96	+	1.85	6.5e-15	3.31e-12
response to organic substance (GO:0010033)	2995	300	190.94	+	1.57	1.07e-14	5.27e-12
cell differentiation (GO:0030154)	3509	337	223.71	+	1.51	3.03e-14	1.41e-11
actin filament-based process (GO:0030029)	598	95	38.12	+	2.49	2.98e-14	1.42e-11
cellular developmental process (GO:0048869)	3562	341	227.09	+	1.5	3.17e-14	1.43e-11
animal organ development (GO:0048513)	3187	312	203.18	+	1.54	4.64e-14	2.03e-11
movement of cell or subcellular component (GO:0006928)	1591	185	101.43	+	1.82	4.84e-14	2.06e-11
regulation of molecular function (GO:0065009)	3178	311	202.61	+	1.53	5.85e-14	2.43e-11
neurogenesis (GO:0022008)	1369	165	87.28	+	1.89	9.32e-14	3.77e-11
detection of chemical stimulus involved in sensory perception (GO:0050907)	486	0	30.98	-	< 0.01	1.02e-13	4.02e-11
sensory perception of chemical stimulus (GO:0007606)	542	1	34.55	-	0.03	1.32e-13	5.09e-11
heart development (GO:0007507)	508	84	32.39	+	2.59	1.97e-13	7.41e-11
cellular component morphogenesis (GO:0032989)	604	92	38.51	+	2.39	8.07e-13	2.96e-10
actin cytoskeleton organization (GO:0030036)	524	84	33.41	+	2.51	9.14e-13	3.28e-10
protein localization (GO:0008104)	2158	226	137.58	+	1.64	1e-12	3.52e-10
detection of stimulus involved in sensory perception (GO:0050906)	554	2	35.32	-	0.06	1.22e-12	4.19e-10
detection of chemical stimulus involved in sensory perception of smell (GO:0050911)	441	0	28.12	-	< 0.01	1.73e-12	5.79e-10
cellular response to chemical stimulus (GO:0070887)	2898	282	184.76	+	1.53	2.16e-12	7.11e-10
muscle structure development (GO:0061061)	460	76	29.33	+	2.59	2.23e-12	7.17e-10
cytoskeleton organization (GO:0007010)	1204	146	76.76	+	1.9	2.39e-12	7.54e-10
neuron projection development (GO:0031175)	683	98	43.54	+	2.25	3.08e-12	9.52e-10
positive regulation of cellular component organization (GO:0051130)	1135	139	72.36	+	1.92	3.58e-12	1.09e-09
generation of neurons (GO:0048699)	1249	149	79.63	+	1.87	3.68e-12	1.09e-09
cellular response to organic substance (GO:0071310)	2331	236	148.61	+	1.59	7.15e-12	2.09e-09
enzyme linked receptor protein signaling pathway (GO:0007167)	726	101	46.28	+	2.18	7.46e-12	2.14e-09
localization (GO:0051179)	5807	489	370.22	+	1.32	7.6e-12	2.14e-09
detection of chemical stimulus (GO:0009593)	522	2	33.28	-	0.06	8.67e-12	2.4e-09
vesicle-mediated transport (GO:0016192)	1958	206	124.83	+	1.65	9.19e-12	2.5e-09
sensory perception of smell (GO:0007608)	468	1	29.84	-	0.03	9.94e-12	2.66e-09
regulation of cellular component movement (GO:0051270)	1026	128	65.41	+	1.96	1.21e-11	3.12e-09
regulation of localization (GO:0032879)	2734	266	174.3	+	1.53	1.2e-11	3.15e-09
cell morphogenesis involved in differentiation (GO:0000904)	554	84	35.32	+	2.38	1.29e-11	3.29e-09
regulation of anatomical structure morphogenesis (GO:0022603)	955	121	60.88	+	1.99	1.55e-11	3.88e-09
cell projection morphogenesis (GO:0048858)	503	78	32.07	+	2.43	1.9e-11	4.61e-09
regulation of cellular metabolic process (GO:0031323)	6106	507	389.28	+	1.3	1.88e-11	4.63e-09
regulation of response to stimulus (GO:0048583)	4240	376	270.31	+	1.39	2.24e-11	5.34e-09
cell morphogenesis (GO:0000902)	711	98	45.33	+	2.16	2.36e-11	5.47e-09
neuron projection morphogenesis (GO:0048812)	495	77	31.56	+	2.44	2.33e-11	5.47e-09
regulation of locomotion (GO:0040012)	990	123	63.12	+	1.95	3.35e-11	7.66e-09
regulation of multicellular organismal process (GO:0051239)	2647	257	168.76	+	1.52	3.62e-11	8.16e-09
cell part morphogenesis (GO:0032990)	522	79	33.28	+	2.37	4.18e-11	9.29e-09
tissue development (GO:0009888)	1732	185	110.42	+	1.68	4.29e-11	9.39e-09
regulation of cell migration (GO:0030334)	885	113	56.42	+	2	4.92e-11	1.03e-08
regulation of metabolic process (GO:0019222)	6847	555	436.52	+	1.27	4.8e-11	1.04e-08
plasma membrane bounded cell projection morphogenesis (GO:0120039)	499	77	31.81	+	2.42	4.89e-11	1.04e-08
regulation of cell differentiation (GO:0045595)	1576	172	100.48	+	1.71	5.22e-11	1.08e-08
response to endogenous stimulus (GO:0009719)	1416	159	90.27	+	1.76	5.33e-11	1.09e-08
regulation of cell projection organization (GO:0031344)	638	90	40.67	+	2.21	5.53e-11	1.12e-08
regulation of catalytic activity (GO:0050790)	2516	246	160.4	+	1.53	5.84e-11	1.15e-08
response to chemical (GO:0042221)	4369	383	278.54	+	1.38	5.79e-11	1.16e-08
regulation of cell motility (GO:2000145)	947	118	60.37	+	1.95	7.81e-11	1.52e-08
regulation of plasma membrane bounded cell projection organization (GO:0120035)	621	88	39.59	+	2.22	8.88e-11	1.71e-08
multicellular organismal process (GO:0032501)	6909	557	440.47	+	1.26	9.71e-11	1.82e-08
macromolecule localization (GO:0033036)	2550	248	162.57	+	1.53	9.65e-11	1.83e-08
regulation of actin filament-based process (GO:0032970)	396	65	25.25	+	2.57	1.2e-10	2.22e-08
regulation of intracellular signal transduction (GO:1902531)	1768	186	112.72	+	1.65	1.24e-10	2.27e-08
positive regulation of developmental process (GO:0051094)	1259	144	80.27	+	1.79	1.57e-10	2.84e-08
cell junction organization (GO:0034330)	501	75	31.94	+	2.35	2.03e-10	3.59e-08
regulation of cytoskeleton organization (GO:0051493)	519	77	33.09	+	2.33	2.02e-10	3.62e-08
collagen fibril organization (GO:0030199)	103	30	6.57	+	4.57	2.17e-10	3.76e-08
response to organonitrogen compound (GO:0010243)	997	121	63.56	+	1.9	2.16e-10	3.78e-08
positive regulation of molecular function (GO:0044093)	1766	185	112.59	+	1.64	2.3e-10	3.94e-08
locomotion (GO:0040011)	1339	150	85.37	+	1.76	2.39e-10	4.06e-08
transmembrane receptor protein tyrosine kinase signaling pathway (GO:0007169)	519	76	33.09	+	2.3	3.93e-10	6.59e-08
regulation of neuron projection development (GO:0010975)	438	68	27.92	+	2.44	4.57e-10	7.59e-08
response to stimulus (GO:0050896)	8496	657	541.65	+	1.21	5.11e-10	8.39e-08
neuron development (GO:0048666)	833	105	53.11	+	1.98	5.61e-10	9.12e-08
regulation of multicellular organismal development (GO:2000026)	1318	146	84.03	+	1.74	7.79e-10	1.25e-07
regulation of organelle organization (GO:0033043)	1188	135	75.74	+	1.78	7.88e-10	1.26e-07
Golgi vesicle transport (GO:0048193)	396	63	25.25	+	2.5	8.15e-10	1.29e-07
regulation of programmed cell death (GO:0043067)	1517	162	96.71	+	1.68	8.42e-10	1.3e-07
plasma membrane bounded cell projection organization (GO:0120036)	1166	133	74.34	+	1.79	8.36e-10	1.3e-07
positive regulation of cell projection organization (GO:0031346)	350	58	22.31	+	2.6	1.06e-09	1.62e-07
sensory perception (GO:0007600)	973	20	62.03	-	0.32	1.13e-09	1.72e-07
axon development (GO:0061564)	419	65	26.71	+	2.43	1.27e-09	1.9e-07
regulation of macromolecule metabolic process (GO:0060255)	6301	509	401.71	+	1.27	1.26e-09	1.9e-07
regulation of primary metabolic process (GO:0080090)	5892	481	375.63	+	1.28	1.34e-09	1.96e-07
regulation of nitrogen compound metabolic process (GO:0051171)	5688	467	362.63	+	1.29	1.34e-09	1.97e-07
cell morphogenesis involved in neuron differentiation (GO:0048667)	449	68	28.63	+	2.38	1.4e-09	2.02e-07
regulation of apoptotic process (GO:0042981)	1479	158	94.29	+	1.68	1.46e-09	2.09e-07
regulation of cell population proliferation (GO:0042127)	1640	171	104.56	+	1.64	1.59e-09	2.24e-07
cell projection organization (GO:0030030)	1212	136	77.27	+	1.76	1.59e-09	2.25e-07
response to nitrogen compound (GO:1901698)	1085	125	69.17	+	1.81	1.62e-09	2.26e-07
cellular response to endogenous stimulus (GO:0071495)	1146	130	73.06	+	1.78	1.89e-09	2.61e-07
protein localization to plasma membrane (GO:0072659)	195	40	12.43	+	3.22	2.05e-09	2.81e-07
anatomical structure formation involved in morphogenesis (GO:0048646)	870	106	55.47	+	1.91	2.07e-09	2.81e-07
cellular response to stimulus (GO:0051716)	6770	539	431.61	+	1.25	2.11e-09	2.84e-07
regulation of cellular response to growth factor stimulus (GO:0090287)	292	51	18.62	+	2.74	2.33e-09	3.12e-07
detection of stimulus (GO:0051606)	718	11	45.77	-	0.24	2.43e-09	3.22e-07
regulation of cell adhesion (GO:0030155)	726	93	46.28	+	2.01	2.89e-09	3.8e-07
protein modification process (GO:0036211)	3019	275	192.47	+	1.43	3.32e-09	4.3e-07
cellular protein modification process (GO:0006464)	3019	275	192.47	+	1.43	3.32e-09	4.33e-07
animal organ morphogenesis (GO:0009887)	945	112	60.25	+	1.86	3.45e-09	4.39e-07
axonogenesis (GO:0007409)	384	60	24.48	+	2.45	3.43e-09	4.4e-07
muscle cell differentiation (GO:0042692)	235	44	14.98	+	2.94	3.78e-09	4.77e-07
organelle organization (GO:0006996)	3574	315	227.85	+	1.38	4.45e-09	5.56e-07
cell junction assembly (GO:0034329)	280	49	17.85	+	2.74	4.81e-09	5.98e-07
cell migration (GO:0016477)	965	113	61.52	+	1.84	4.99e-09	6.15e-07
regulation of cellular protein localization (GO:1903827)	564	77	35.96	+	2.14	5.28e-09	6.4e-07
vasculature development (GO:0001944)	512	72	32.64	+	2.21	5.27e-09	6.44e-07
regulation of cellular localization (GO:0060341)	836	102	53.3	+	1.91	5.35e-09	6.45e-07
tissue morphogenesis (GO:0048729)	532	74	33.92	+	2.18	5.41e-09	6.47e-07
regulation of cell death (GO:0010941)	1652	169	105.32	+	1.6	6.46e-09	7.6e-07
cellular localization (GO:0051641)	3003	272	191.45	+	1.42	6.44e-09	7.64e-07
positive regulation of cellular metabolic process (GO:0031325)	3238	289	206.43	+	1.4	7.19e-09	8.4e-07
striated muscle cell differentiation (GO:0051146)	190	38	12.11	+	3.14	9.35e-09	1.08e-06
cell motility (GO:0048870)	1103	123	70.32	+	1.75	1.35e-08	1.53e-06
neuron differentiation (GO:0030182)	1028	117	65.54	+	1.79	1.34e-08	1.54e-06
localization of cell (GO:0051674)	1103	123	70.32	+	1.75	1.35e-08	1.54e-06
response to growth factor (GO:0070848)	532	73	33.92	+	2.15	1.51e-08	1.7e-06
positive regulation of signaling (GO:0023056)	1720	173	109.66	+	1.58	1.56e-08	1.74e-06
regulation of cellular component biogenesis (GO:0044087)	967	111	61.65	+	1.8	1.73e-08	1.92e-06
cellular protein localization (GO:0034613)	1639	166	104.49	+	1.59	1.89e-08	2.08e-06
positive regulation of signal transduction (GO:0009967)	1551	159	98.88	+	1.61	2.08e-08	2.28e-06
blood vessel development (GO:0001568)	489	68	31.18	+	2.18	2.11e-08	2.3e-06
regulation of protein localization (GO:0032880)	899	105	57.31	+	1.83	2.54e-08	2.74e-06
cellular macromolecule localization (GO:0070727)	1645	166	104.87	+	1.58	2.66e-08	2.86e-06
tube morphogenesis (GO:0035239)	645	82	41.12	+	1.99	2.92e-08	3.12e-06
negative regulation of cell communication (GO:0010648)	1373	144	87.53	+	1.65	3.18e-08	3.36e-06
negative regulation of signaling (GO:0023057)	1376	144	87.72	+	1.64	3.28e-08	3.45e-06
positive regulation of metabolic process (GO:0009893)	3719	320	237.1	+	1.35	3.38e-08	3.53e-06
regulation of biological quality (GO:0065008)	4007	340	255.46	+	1.33	3.65e-08	3.78e-06
regulation of hydrolase activity (GO:0051336)	1308	138	83.39	+	1.65	4.18e-08	4.31e-06
positive regulation of cell communication (GO:0010647)	1714	170	109.27	+	1.56	4.76e-08	4.88e-06
regulation of supramolecular fiber organization (GO:1902903)	375	56	23.91	+	2.34	4.9e-08	4.98e-06
regulation of cell morphogenesis (GO:0022604)	308	49	19.64	+	2.5	5.68e-08	5.74e-06
cell communication (GO:0007154)	5572	447	355.23	+	1.26	6.79e-08	6.82e-06
tube development (GO:0035295)	841	98	53.62	+	1.83	7.03e-08	7.02e-06
regulation of actin cytoskeleton organization (GO:0032956)	356	54	22.7	+	2.38	7.19e-08	7.14e-06
negative regulation of signal transduction (GO:0009968)	1276	134	81.35	+	1.65	7.94e-08	7.78e-06
positive regulation of nitrogen compound metabolic process (GO:0051173)	3058	270	194.96	+	1.38	7.9e-08	7.79e-06
cellular response to growth factor stimulus (GO:0071363)	503	68	32.07	+	2.12	8.2e-08	7.98e-06
vascular endothelial growth factor receptor signaling pathway (GO:0048010)	71	21	4.53	+	4.64	8.71e-08	8.43e-06
negative regulation of metabolic process (GO:0009892)	3104	273	197.89	+	1.38	9.44e-08	9.08e-06
protein localization to cell periphery (GO:1990778)	234	41	14.92	+	2.75	1.02e-07	9.72e-06
response to endoplasmic reticulum stress (GO:0034976)	258	43	16.45	+	2.61	1.15e-07	1.09e-05
negative regulation of transcription, DNA-templated (GO:0045892)	1288	134	82.11	+	1.63	1.26e-07	1.19e-05
positive regulation of locomotion (GO:0040017)	558	72	35.57	+	2.02	1.37e-07	1.29e-05
signal transduction (GO:0007165)	5138	415	327.56	+	1.27	1.56e-07	1.45e-05
axon guidance (GO:0007411)	278	45	17.72	+	2.54	1.56e-07	1.46e-05
positive regulation of catalytic activity (GO:0043085)	1415	144	90.21	+	1.6	1.65e-07	1.51e-05
response to oxygen-containing compound (GO:1901700)	1584	157	100.99	+	1.55	1.67e-07	1.52e-05
neuron projection guidance (GO:0097485)	279	45	17.79	+	2.53	1.65e-07	1.52e-05
negative regulation of nucleic acid-templated transcription (GO:1903507)	1290	134	82.24	+	1.63	1.7e-07	1.54e-05
negative regulation of RNA biosynthetic process (GO:1902679)	1292	134	82.37	+	1.63	1.73e-07	1.55e-05
regulation of intracellular transport (GO:0032386)	361	53	23.01	+	2.3	1.73e-07	1.56e-05
establishment of protein localization (GO:0045184)	1558	155	99.33	+	1.56	1.77e-07	1.57e-05
peptide transport (GO:0015833)	1492	150	95.12	+	1.58	1.81e-07	1.6e-05
regulation of cell-substrate adhesion (GO:0010810)	217	38	13.83	+	2.75	1.96e-07	1.73e-05
negative regulation of macromolecule metabolic process (GO:0010605)	2861	253	182.4	+	1.39	2.08e-07	1.83e-05
positive regulation of macromolecule metabolic process (GO:0010604)	3431	294	218.74	+	1.34	2.39e-07	2.08e-05
negative regulation of cell population proliferation (GO:0008285)	689	83	43.93	+	1.89	2.54e-07	2.2e-05
regulation of cell-matrix adhesion (GO:0001952)	123	27	7.84	+	3.44	2.6e-07	2.24e-05
positive regulation of cell migration (GO:0030335)	518	67	33.02	+	2.03	3.38e-07	2.9e-05
protein transport (GO:0015031)	1463	146	93.27	+	1.57	3.42e-07	2.92e-05
negative regulation of cellular metabolic process (GO:0031324)	2580	231	164.48	+	1.4	3.76e-07	3.17e-05
post-Golgi vesicle-mediated transport (GO:0006892)	134	28	8.54	+	3.28	3.76e-07	3.19e-05
cellular component assembly (GO:0022607)	2438	220	155.43	+	1.42	3.95e-07	3.31e-05
protein metabolic process (GO:0019538)	4218	348	268.91	+	1.29	4.27e-07	3.57e-05
cellular protein metabolic process (GO:0044267)	3643	307	232.25	+	1.32	4.53e-07	3.76e-05
regulation of cell shape (GO:0008360)	153	30	9.75	+	3.08	4.77e-07	3.94e-05
cellular response to organonitrogen compound (GO:0071417)	591	73	37.68	+	1.94	4.84e-07	3.97e-05
blood vessel morphogenesis (GO:0048514)	406	56	25.88	+	2.16	4.9e-07	4.01e-05
negative regulation of nitrogen compound metabolic process (GO:0051172)	2390	216	152.37	+	1.42	4.95e-07	4.01e-05
post-translational protein modification (GO:0043687)	361	52	23.01	+	2.26	4.94e-07	4.02e-05
cell-cell adhesion (GO:0098609)	514	66	32.77	+	2.01	5.05e-07	4.06e-05
negative regulation of cell differentiation (GO:0045596)	638	77	40.67	+	1.89	5.37e-07	4.27e-05
macromolecule modification (GO:0043412)	3240	278	206.56	+	1.35	5.34e-07	4.28e-05
establishment of localization in cell (GO:0051649)	2365	214	150.78	+	1.42	5.52e-07	4.38e-05
amide transport (GO:0042886)	1526	150	97.29	+	1.54	5.62e-07	4.43e-05
positive regulation of intracellular signal transduction (GO:1902533)	1015	109	64.71	+	1.68	5.7e-07	4.47e-05
signaling (GO:0023052)	5485	434	349.69	+	1.24	6.5e-07	5.07e-05
adaptive immune response (GO:0002250)	649	13	41.38	-	0.31	6.95e-07	5.38e-05
cellular response to oxygen-containing compound (GO:1901701)	1058	112	67.45	+	1.66	6.94e-07	5.39e-05
regulation of transcription, DNA-templated (GO:0006355)	3464	293	220.84	+	1.33	7.15e-07	5.5e-05
regulation of nucleic acid-templated transcription (GO:1903506)	3465	293	220.91	+	1.33	7.19e-07	5.51e-05
positive regulation of cell differentiation (GO:0045597)	827	93	52.72	+	1.76	7.79e-07	5.94e-05
cardiac chamber development (GO:0003205)	158	30	10.07	+	2.98	8.6e-07	6.52e-05
regulation of cell-substrate junction organization (GO:0150116)	69	19	4.4	+	4.32	8.86e-07	6.63e-05
regulation of RNA biosynthetic process (GO:2001141)	3470	293	221.22	+	1.32	8.79e-07	6.64e-05
negative regulation of biosynthetic process (GO:0009890)	1588	154	101.24	+	1.52	8.84e-07	6.64e-05
positive regulation of cell motility (GO:2000147)	543	68	34.62	+	1.96	9.27e-07	6.9e-05
negative regulation of cellular macromolecule biosynthetic process (GO:2000113)	1487	146	94.8	+	1.54	9.51e-07	7.04e-05
muscle system process (GO:0003012)	289	44	18.42	+	2.39	9.63e-07	7.06e-05
head development (GO:0060322)	788	89	50.24	+	1.77	9.6e-07	7.08e-05
negative regulation of developmental process (GO:0051093)	870	96	55.47	+	1.73	1e-06	7.32e-05
negative regulation of response to stimulus (GO:0048585)	1804	170	115.01	+	1.48	1.01e-06	7.38e-05
regulation of GTPase activity (GO:0043087)	490	63	31.24	+	2.02	1.06e-06	7.64e-05
negative regulation of RNA metabolic process (GO:0051253)	1394	138	88.87	+	1.55	1.09e-06	7.86e-05
positive regulation of hydrolase activity (GO:0051345)	777	88	49.54	+	1.78	1.13e-06	8.11e-05
regulation of RNA metabolic process (GO:0051252)	3738	311	238.31	+	1.31	1.23e-06	8.8e-05
negative regulation of macromolecule biosynthetic process (GO:0010558)	1498	146	95.5	+	1.53	1.36e-06	9.64e-05
positive regulation of intracellular transport (GO:0032388)	227	37	14.47	+	2.56	1.38e-06	9.77e-05
cellular response to nitrogen compound (GO:1901699)	651	77	41.5	+	1.86	1.46e-06	0.000103
cell surface receptor signaling pathway (GO:0007166)	2486	220	158.49	+	1.39	1.49e-06	0.000104
morphogenesis of an epithelium (GO:0002009)	430	57	27.41	+	2.08	1.51e-06	0.000105
negative regulation of molecular function (GO:0044092)	1171	120	74.66	+	1.61	1.56e-06	0.000108
negative regulation of cellular biosynthetic process (GO:0031327)	1556	150	99.2	+	1.51	1.58e-06	0.000109
endoplasmic reticulum to Golgi vesicle-mediated transport (GO:0006888)	196	34	12.5	+	2.72	1.64e-06	0.000113
positive regulation of cellular component movement (GO:0051272)	556	68	35.45	+	1.92	1.9e-06	0.000131
muscle cell development (GO:0055001)	139	27	8.86	+	3.05	2.05e-06	0.000139
negative regulation of cellular component organization (GO:0051129)	718	82	45.77	+	1.79	2.04e-06	0.00014
cardiac muscle tissue development (GO:0048738)	148	28	9.44	+	2.97	2.1e-06	0.000142
regulation of gene expression (GO:0010468)	4872	388	310.61	+	1.25	2.15e-06	0.000145
muscle tissue development (GO:0060537)	280	42	17.85	+	2.35	2.25e-06	0.00015
cellular protein catabolic process (GO:0044257)	629	74	40.1	+	1.85	2.26e-06	0.000151
muscle organ development (GO:0007517)	280	42	17.85	+	2.35	2.25e-06	0.000151
developmental growth (GO:0048589)	354	49	22.57	+	2.17	2.28e-06	0.000151
intracellular transport (GO:0046907)	1499	145	95.57	+	1.52	2.34e-06	0.000154
negative regulation of cell death (GO:0060548)	998	105	63.63	+	1.65	2.39e-06	0.000157
membrane biogenesis (GO:0044091)	40	14	2.55	+	5.49	2.43e-06	0.000159
response to hormone (GO:0009725)	807	89	51.45	+	1.73	2.53e-06	0.000165
actin filament organization (GO:0007015)	270	41	17.21	+	2.38	2.66e-06	0.000173
regulation of cellular response to transforming growth factor beta stimulus (GO:1903844)	124	25	7.91	+	3.16	2.72e-06	0.000175
proteolysis involved in cellular protein catabolic process (GO:0051603)	596	71	38	+	1.87	2.72e-06	0.000176
negative regulation of locomotion (GO:0040013)	314	45	20.02	+	2.25	2.76e-06	0.000177
regulation of Wnt signaling pathway (GO:0030111)	366	50	23.33	+	2.14	2.97e-06	0.00019
regulation of protein metabolic process (GO:0051246)	2595	226	165.44	+	1.37	3.42e-06	0.000217
positive regulation of supramolecular fiber organization (GO:1902905)	197	33	12.56	+	2.63	3.49e-06	0.000221
regulation of cellular protein metabolic process (GO:0032268)	2437	214	155.37	+	1.38	3.56e-06	0.000225
protein catabolic process (GO:0030163)	683	78	43.54	+	1.79	3.67e-06	0.000231
growth (GO:0040007)	357	49	22.76	+	2.15	3.74e-06	0.000234
striated muscle tissue development (GO:0014706)	265	40	16.89	+	2.37	3.94e-06	0.000245
regulation of cell development (GO:0060284)	490	61	31.24	+	1.95	4.11e-06	0.000255
Golgi to plasma membrane protein transport (GO:0043001)	30	12	1.91	+	6.27	4.2e-06	0.00026
brain development (GO:0007420)	745	83	47.5	+	1.75	4.38e-06	0.00027
positive regulation of cell adhesion (GO:0045785)	435	56	27.73	+	2.02	4.46e-06	0.000274
regulation of cell-substrate junction assembly (GO:0090109)	64	17	4.08	+	4.17	4.96e-06	0.000302
regulation of focal adhesion assembly (GO:0051893)	64	17	4.08	+	4.17	4.96e-06	0.000303
negative regulation of cell motility (GO:2000146)	282	41	17.98	+	2.28	5.12e-06	0.00031
regulation of nucleobase-containing compound metabolic process (GO:0019219)	4007	325	255.46	+	1.27	5.47e-06	0.000328
nitrogen compound transport (GO:0071705)	1801	166	114.82	+	1.45	5.44e-06	0.000329
regulation of transforming growth factor beta receptor signaling pathway (GO:0017015)	121	24	7.71	+	3.11	5.46e-06	0.000329
muscle contraction (GO:0006936)	243	37	15.49	+	2.39	5.84e-06	0.000349
negative regulation of cellular component movement (GO:0051271)	290	42	18.49	+	2.27	5.9e-06	0.000351
negative regulation of programmed cell death (GO:0043069)	907	96	57.82	+	1.66	6.01e-06	0.000355
regulation of nervous system development (GO:0051960)	428	55	27.29	+	2.02	6e-06	0.000356
regulation of actin filament organization (GO:0110053)	276	40	17.6	+	2.27	7.16e-06	0.000422
negative regulation of nucleobase-containing compound metabolic process (GO:0045934)	1514	143	96.52	+	1.48	7.43e-06	0.000436
response to peptide hormone (GO:0043434)	400	52	25.5	+	2.04	7.6e-06	0.000444
synapse organization (GO:0050808)	285	41	18.17	+	2.26	8.62e-06	0.000501
regulation of cellular macromolecule biosynthetic process (GO:2000112)	3913	317	249.47	+	1.27	8.88e-06	0.000515
regulation of protein localization to membrane (GO:1905475)	199	32	12.69	+	2.52	9.08e-06	0.000524
extracellular matrix assembly (GO:0085029)	33	12	2.1	+	5.7	9.25e-06	0.000531
regulation of cellular biosynthetic process (GO:0031326)	4105	330	261.71	+	1.26	9.25e-06	0.000532
cardiac chamber morphogenesis (GO:0003206)	117	23	7.46	+	3.08	9.66e-06	0.000552
urogenital system development (GO:0001655)	320	44	20.4	+	2.16	9.76e-06	0.000556
developmental cell growth (GO:0048588)	84	19	5.36	+	3.55	1.04e-05	0.000588
cellular component biogenesis (GO:0044085)	2701	230	172.2	+	1.34	1.1e-05	0.000619
negative regulation of transcription by RNA polymerase II (GO:0000122)	902	94	57.51	+	1.63	1.11e-05	0.000623
membrane assembly (GO:0071709)	34	12	2.17	+	5.54	1.18e-05	0.000664
regulation of phosphorylation (GO:0042325)	1400	133	89.25	+	1.49	1.27e-05	0.000706
negative regulation of apoptotic process (GO:0043066)	888	93	56.61	+	1.64	1.27e-05	0.000707
chemotaxis (GO:0006935)	546	64	34.81	+	1.84	1.27e-05	0.000708
taxis (GO:0042330)	549	64	35	+	1.83	1.38e-05	0.000763
cell growth (GO:0016049)	86	19	5.48	+	3.47	1.38e-05	0.000765
central nervous system development (GO:0007417)	991	101	63.18	+	1.6	1.41e-05	0.000775
nervous system process (GO:0050877)	1380	50	87.98	-	0.57	1.43e-05	0.000783
regulation of macromolecule biosynthetic process (GO:0010556)	3944	317	251.44	+	1.26	1.55e-05	0.000845
cell-substrate adhesion (GO:0031589)	185	30	11.79	+	2.54	1.55e-05	0.000846
embryo development (GO:0009790)	971	99	61.9	+	1.6	1.59e-05	0.00086
apoptotic process (GO:0006915)	912	94	58.14	+	1.62	1.67e-05	0.000901
positive regulation of cytoskeleton organization (GO:0051495)	214	33	13.64	+	2.42	1.7e-05	0.000915
positive regulation of response to stimulus (GO:0048584)	2278	198	145.23	+	1.36	1.86e-05	0.00099
regulation of protein modification process (GO:0031399)	1633	150	104.11	+	1.44	1.85e-05	0.000993
response to peptide (GO:1901652)	480	58	30.6	+	1.9	1.86e-05	0.000993
regulation of intracellular protein transport (GO:0033157)	258	37	16.45	+	2.25	1.97e-05	0.00104
response to topologically incorrect protein (GO:0035966)	188	30	11.99	+	2.5	1.96e-05	0.00104
regulation of phosphorus metabolic process (GO:0051174)	1611	148	102.71	+	1.44	2.08e-05	0.0011
regulation of phosphate metabolic process (GO:0019220)	1611	148	102.71	+	1.44	2.08e-05	0.0011
translation (GO:0006412)	384	6	24.48	-	0.25	2.15e-05	0.00113
ubiquitin-dependent protein catabolic process (GO:0006511)	533	62	33.98	+	1.82	2.21e-05	0.00115
cardiac cell development (GO:0055006)	58	15	3.7	+	4.06	2.31e-05	0.0012
regulation of neurogenesis (GO:0050767)	352	46	22.44	+	2.05	2.39e-05	0.00124
negative regulation of cell migration (GO:0030336)	267	38	17.02	+	2.23	2.42e-05	0.00125
regulation of protein kinase B signaling (GO:0051896)	237	35	15.11	+	2.32	2.46e-05	0.00127
heart morphogenesis (GO:0003007)	237	35	15.11	+	2.32	2.46e-05	0.00127
cellular response to vascular endothelial growth factor stimulus (GO:0035924)	44	13	2.81	+	4.63	2.5e-05	0.00127
cell-substrate junction assembly (GO:0007044)	44	13	2.81	+	4.63	2.5e-05	0.00128
regulation of endothelial cell migration (GO:0010594)	170	28	10.84	+	2.58	2.53e-05	0.00129
regulation of protein transport (GO:0051223)	567	65	36.15	+	1.8	2.58e-05	0.00131
regulation of transmembrane receptor protein serine/threonine kinase signaling pathway (GO:0090092)	251	36	16	+	2.25	2.59e-05	0.00131
epithelium development (GO:0060429)	1097	108	69.94	+	1.54	2.63e-05	0.00133
organonitrogen compound metabolic process (GO:1901564)	5251	405	334.77	+	1.21	2.66e-05	0.00134
positive regulation of GTPase activity (GO:0043547)	413	51	26.33	+	1.94	2.74e-05	0.00137
striated muscle cell development (GO:0055002)	91	19	5.8	+	3.27	2.73e-05	0.00137
regulation of biosynthetic process (GO:0009889)	4189	332	267.06	+	1.24	2.78e-05	0.00138
positive regulation of protein metabolic process (GO:0051247)	1538	142	98.05	+	1.45	2.82e-05	0.0014
positive regulation of apoptotic process (GO:0043065)	549	63	35	+	1.8	2.85e-05	0.00141
negative regulation of multicellular organismal process (GO:0051241)	1002	100	63.88	+	1.57	2.88e-05	0.00142
cellular macromolecule metabolic process (GO:0044260)	4963	385	316.41	+	1.22	2.92e-05	0.00143
dendrite development (GO:0016358)	109	21	6.95	+	3.02	3.01e-05	0.00148
cell-substrate junction organization (GO:0150115)	45	13	2.87	+	4.53	3.04e-05	0.00149
cardiac ventricle development (GO:0003231)	118	22	7.52	+	2.92	3.05e-05	0.00149
regulation of anatomical structure size (GO:0090066)	506	59	32.26	+	1.83	3.12e-05	0.00151
cardiac septum development (GO:0003279)	101	20	6.44	+	3.11	3.29e-05	0.00159
regulation of epithelial cell migration (GO:0010632)	231	34	14.73	+	2.31	3.5e-05	0.00169
establishment of localization (GO:0051234)	4653	363	296.64	+	1.22	3.51e-05	0.00169
cardiac muscle cell development (GO:0055013)	53	14	3.38	+	4.14	3.52e-05	0.00169
regulation of protein phosphorylation (GO:0001932)	1210	116	77.14	+	1.5	3.56e-05	0.0017
modification-dependent protein catabolic process (GO:0019941)	540	62	34.43	+	1.8	3.57e-05	0.0017
regulation of establishment of protein localization (GO:0070201)	592	66	37.74	+	1.75	3.88e-05	0.00184
response to unfolded protein (GO:0006986)	167	27	10.65	+	2.54	4.43e-05	0.0021
establishment of protein localization to plasma membrane (GO:0061951)	47	13	3	+	4.34	4.46e-05	0.0021
renal system development (GO:0072001)	288	39	18.36	+	2.12	4.77e-05	0.00224
endomembrane system organization (GO:0010256)	488	57	31.11	+	1.83	4.81e-05	0.00226
organic substance transport (GO:0071702)	2170	187	138.34	+	1.35	5.11e-05	0.00239
transport (GO:0006810)	4501	351	286.95	+	1.22	5.16e-05	0.00241
regulation of axonogenesis (GO:0050770)	158	26	10.07	+	2.58	5.18e-05	0.00241
ameboidal-type cell migration (GO:0001667)	180	28	11.48	+	2.44	5.36e-05	0.00249
intracellular signal transduction (GO:0035556)	1575	143	100.41	+	1.42	5.42e-05	0.0025
positive regulation of programmed cell death (GO:0043068)	564	63	35.96	+	1.75	5.41e-05	0.0025
response to transforming growth factor beta (GO:0071559)	159	26	10.14	+	2.56	5.52e-05	0.00254
skeletal system development (GO:0001501)	471	55	30.03	+	1.83	5.57e-05	0.00255
positive regulation of intracellular protein transport (GO:0090316)	186	29	11.86	+	2.45	6e-05	0.00274
modification-dependent macromolecule catabolic process (GO:0043632)	551	62	35.13	+	1.76	6.15e-05	0.0028
positive regulation of multicellular organismal process (GO:0051240)	1386	128	88.36	+	1.45	6.47e-05	0.00294
negative regulation of catalytic activity (GO:0043086)	814	83	51.9	+	1.6	7.35e-05	0.00332
viral process (GO:0016032)	849	86	54.13	+	1.59	7.37e-05	0.00332
forebrain development (GO:0030900)	380	47	24.23	+	1.94	7.34e-05	0.00333
positive regulation of endothelial cell migration (GO:0010595)	108	20	6.89	+	2.9	7.48e-05	0.00336
cellular response to stress (GO:0033554)	1755	155	111.89	+	1.39	8.1e-05	0.00362
coronary vasculature development (GO:0060976)	43	12	2.74	+	4.38	8.09e-05	0.00362
positive regulation of axonogenesis (GO:0050772)	83	17	5.29	+	3.21	8.75e-05	0.0039
regulation of growth (GO:0040008)	657	70	41.89	+	1.67	8.89e-05	0.00395
vesicle organization (GO:0016050)	310	40	19.76	+	2.02	9.03e-05	0.004
actin filament-based movement (GO:0030048)	119	21	7.59	+	2.77	9.17e-05	0.00404
response to hydrogen peroxide (GO:0042542)	119	21	7.59	+	2.77	9.17e-05	0.00405
regulation of cell junction assembly (GO:1901888)	196	29	12.5	+	2.32	9.71e-05	0.00426
vesicle-mediated transport to the plasma membrane (GO:0098876)	84	17	5.36	+	3.17	9.94e-05	0.00434
regulation of transport (GO:0051049)	1758	155	112.08	+	1.38	9.92e-05	0.00435
regulation of transferase activity (GO:0051338)	1025	99	65.35	+	1.51	0.000104	0.0045
positive regulation of RNA metabolic process (GO:0051254)	1718	152	109.53	+	1.39	0.000103	0.00451
negative regulation of cellular response to growth factor stimulus (GO:0090288)	111	20	7.08	+	2.83	0.000104	0.00451
semaphorin-plexin signaling pathway involved in neuron projection guidance (GO:1902285)	13	7	0.83	+	8.45	0.000106	0.00457
cardiac muscle cell differentiation (GO:0055007)	76	16	4.85	+	3.3	0.000106	0.00457
Golgi to plasma membrane transport (GO:0006893)	52	13	3.32	+	3.92	0.000107	0.0046
positive regulation of protein localization to membrane (GO:1905477)	130	22	8.29	+	2.65	0.000108	0.00465
regulation of muscle system process (GO:0090257)	229	32	14.6	+	2.19	0.000112	0.00477
positive regulation of cellular protein localization (GO:1903829)	301	39	19.19	+	2.03	0.000112	0.0048
positive regulation of cellular protein metabolic process (GO:0032270)	1456	132	92.82	+	1.42	0.000116	0.00492
cell death (GO:0008219)	1079	103	68.79	+	1.5	0.000116	0.00492
regulation of extracellular matrix organization (GO:1903053)	45	12	2.87	+	4.18	0.000117	0.00494
regulation of peptide transport (GO:0090087)	600	65	38.25	+	1.7	0.00012	0.00504
positive regulation of cell death (GO:0010942)	627	67	39.97	+	1.68	0.00012	0.00505
cardiac ventricle morphogenesis (GO:0003208)	69	15	4.4	+	3.41	0.000127	0.00531
regulation of smooth muscle cell migration (GO:0014910)	61	14	3.89	+	3.6	0.000129	0.00534
positive regulation of transcription, DNA-templated (GO:0045893)	1622	144	103.41	+	1.39	0.00013	0.00535
neuron projection extension (GO:1990138)	61	14	3.89	+	3.6	0.000129	0.00535
cellular response to topologically incorrect protein (GO:0035967)	149	24	9.5	+	2.53	0.000128	0.00535
regulation of cellular component size (GO:0032535)	384	46	24.48	+	1.88	0.00013	0.00535
cellular response to hormone stimulus (GO:0032870)	523	58	33.34	+	1.74	0.000128	0.00536
positive regulation of RNA biosynthetic process (GO:1902680)	1623	144	103.47	+	1.39	0.000131	0.00536
positive regulation of nucleic acid-templated transcription (GO:1903508)	1622	144	103.41	+	1.39	0.00013	0.00536
developmental growth involved in morphogenesis (GO:0060560)	113	20	7.2	+	2.78	0.000129	0.00536
actomyosin structure organization (GO:0031032)	104	19	6.63	+	2.87	0.000131	0.00537
cellular response to peptide hormone stimulus (GO:0071375)	274	36	17.47	+	2.06	0.000148	0.00602
negative regulation of protein phosphorylation (GO:0001933)	351	43	22.38	+	1.92	0.000148	0.00603
programmed cell death (GO:0012501)	1044	100	66.56	+	1.5	0.00015	0.00607
protein localization to membrane (GO:0072657)	537	59	34.24	+	1.72	0.000151	0.00612
negative regulation of cell projection organization (GO:0031345)	180	27	11.48	+	2.35	0.000156	0.0063
anion transport (GO:0006820)	2287	192	145.8	+	1.32	0.000157	0.00632
cellular response to transforming growth factor beta stimulus (GO:0071560)	152	24	9.69	+	2.48	0.000158	0.00633
regulation of kinase activity (GO:0043549)	908	89	57.89	+	1.54	0.000161	0.00647
positive regulation of protein kinase B signaling (GO:0051897)	181	27	11.54	+	2.34	0.000164	0.00655
negative regulation of cellular protein metabolic process (GO:0032269)	984	95	62.73	+	1.51	0.000166	0.00659
regulation of cardiac muscle cell action potential (GO:0098901)	26	9	1.66	+	5.43	0.000166	0.0066
G protein-coupled receptor signaling pathway (GO:0007186)	1329	52	84.73	-	0.61	0.00017	0.00675
lymphocyte mediated immunity (GO:0002449)	254	3	16.19	-	0.19	0.000176	0.00698
kidney development (GO:0001822)	279	36	17.79	+	2.02	0.000183	0.00722
integrin-mediated signaling pathway (GO:0007229)	98	18	6.25	+	2.88	0.000184	0.00723
regulation of cell cycle (GO:0051726)	1196	111	76.25	+	1.46	0.000185	0.00728
endosomal transport (GO:0016197)	233	32	14.85	+	2.15	0.000199	0.00777
positive regulation of cell-matrix adhesion (GO:0001954)	56	13	3.57	+	3.64	0.000202	0.00786
proteasomal protein catabolic process (GO:0010498)	345	42	21.99	+	1.91	0.000202	0.00787
ERAD pathway (GO:0036503)	90	17	5.74	+	2.96	0.000205	0.00798
coronary vasculature morphogenesis (GO:0060977)	15	7	0.96	+	7.32	0.00021	0.00806
regulation of canonical Wnt signaling pathway (GO:0060828)	288	37	18.36	+	2.02	0.000208	0.00806
vesicle cargo loading (GO:0035459)	27	9	1.72	+	5.23	0.000209	0.00807
negative regulation of protein metabolic process (GO:0051248)	1056	100	67.32	+	1.49	0.00021	0.00807
basement membrane organization (GO:0071711)	27	9	1.72	+	5.23	0.000209	0.00809
cellular nitrogen compound metabolic process (GO:0034641)	3407	167	217.21	-	0.77	0.000214	0.00816
response to cytokine (GO:0034097)	1097	103	69.94	+	1.47	0.000214	0.00817
negative regulation of transforming growth factor beta receptor signaling pathway (GO:0030512)	82	16	5.23	+	3.06	0.000227	0.00862
positive regulation of neuron projection development (GO:0010976)	157	24	10.01	+	2.4	0.000229	0.00863
protein modification by small protein conjugation or removal (GO:0070647)	1031	98	65.73	+	1.49	0.000228	0.00864
regulation of muscle adaptation (GO:0043502)	82	16	5.23	+	3.06	0.000227	0.00864
cellular aromatic compound metabolic process (GO:0006725)	2948	141	187.94	-	0.75	0.000228	0.00865
humoral immune response (GO:0006959)	386	8	24.61	-	0.33	0.000237	0.00891
regulation of transcription by RNA polymerase II (GO:0006357)	2586	212	164.87	+	1.29	0.000241	0.00904
cellular response to peptide (GO:1901653)	334	41	21.29	+	1.93	0.000242	0.00906
peptide biosynthetic process (GO:0043043)	409	9	26.08	-	0.35	0.000244	0.00911
angiogenesis (GO:0001525)	314	39	20.02	+	1.95	0.000245	0.00914
protein modification by small protein conjugation (GO:0032446)	821	81	52.34	+	1.55	0.000248	0.00923
positive regulation of cell development (GO:0010720)	294	37	18.74	+	1.97	0.000252	0.00937
regulation of epithelial to mesenchymal transition (GO:0010717)	92	17	5.87	+	2.9	0.000258	0.00956
cellular response to amino acid stimulus (GO:0071230)	66	14	4.21	+	3.33	0.000262	0.00966
positive regulation of transport (GO:0051050)	936	90	59.67	+	1.51	0.000262	0.00969
biological process involved in symbiotic interaction (GO:0044403)	937	90	59.74	+	1.51	0.000266	0.00976
axon extension (GO:0048675)	35	10	2.23	+	4.48	0.000268	0.00983
actin filament bundle assembly (GO:0051017)	58	13	3.7	+	3.52	0.000271	0.00989
regulation of cell aging (GO:0090342)	50	12	3.19	+	3.76	0.00027	0.00989
positive regulation of cellular component biogenesis (GO:0044089)	527	57	33.6	+	1.7	0.000271	0.0099
regulation of protein-containing complex assembly (GO:0043254)	454	51	28.94	+	1.76	0.000277	0.0101
response to estradiol (GO:0032355)	138	22	8.8	+	2.5	0.00028	0.0101
ubiquitin-dependent ERAD pathway (GO:0030433)	75	15	4.78	+	3.14	0.00028	0.0101
cardiocyte differentiation (GO:0035051)	102	18	6.5	+	2.77	0.000283	0.0102
establishment or maintenance of cell polarity (GO:0007163)	195	28	12.43	+	2.25	0.000287	0.0103
positive regulation of cell-substrate adhesion (GO:0010811)	126	21	8.03	+	2.61	0.000295	0.0106
positive regulation of epithelial cell migration (GO:0010634)	150	23	9.56	+	2.41	0.000299	0.0107
organonitrogen compound catabolic process (GO:1901565)	1080	101	68.85	+	1.47	0.000311	0.0111
nucleobase-containing compound metabolic process (GO:0006139)	2719	129	173.35	-	0.74	0.000315	0.0112
elastic fiber assembly (GO:0048251)	11	6	0.7	+	8.56	0.00032	0.0113
semaphorin-plexin signaling pathway involved in axon guidance (GO:1902287)	11	6	0.7	+	8.56	0.00032	0.0114
cell activation (GO:0001775)	1084	101	69.11	+	1.46	0.000321	0.0114
glomerular basement membrane development (GO:0032836)	11	6	0.7	+	8.56	0.00032	0.0114
protein localization to Golgi apparatus (GO:0034067)	29	9	1.85	+	4.87	0.000325	0.0115
response to wounding (GO:0009611)	543	58	34.62	+	1.68	0.000329	0.0116
positive regulation of protein transport (GO:0051222)	329	40	20.97	+	1.91	0.000335	0.0118
regulation of protein catabolic process (GO:0042176)	397	46	25.31	+	1.82	0.000347	0.0122
cellular response to unfolded protein (GO:0034620)	130	21	8.29	+	2.53	0.000356	0.0124
regulation of catabolic process (GO:0009894)	1021	96	65.09	+	1.47	0.000355	0.0124
response to acid chemical (GO:0001101)	130	21	8.29	+	2.53	0.000356	0.0124
body morphogenesis (GO:0010171)	44	11	2.81	+	3.92	0.000358	0.0124
glomerulus development (GO:0032835)	52	12	3.32	+	3.62	0.000368	0.0128
positive regulation of protein catabolic process (GO:0045732)	235	31	14.98	+	2.07	0.000375	0.013
Golgi to endosome transport (GO:0006895)	17	7	1.08	+	6.46	0.000383	0.0132
proteolysis (GO:0006508)	1289	116	82.18	+	1.41	0.000384	0.0132
endoplasmic reticulum unfolded protein response (GO:0030968)	105	18	6.69	+	2.69	0.000386	0.0133
positive regulation of protein localization to cell periphery (GO:1904377)	69	14	4.4	+	3.18	0.000389	0.0133
positive regulation of response to endoplasmic reticulum stress (GO:1905898)	37	10	2.36	+	4.24	0.00039	0.0133
positive regulation of cell-substrate junction organization (GO:0150117)	30	9	1.91	+	4.71	0.0004	0.0137
regulation of angiogenesis (GO:0045765)	277	35	17.66	+	1.98	0.000404	0.0138
regulation of cellular catabolic process (GO:0031329)	855	83	54.51	+	1.52	0.000412	0.014
actin filament bundle organization (GO:0061572)	61	13	3.89	+	3.34	0.000414	0.014
organic cyclic compound metabolic process (GO:1901360)	3190	157	203.37	-	0.77	0.000426	0.0144
collagen-activated tyrosine kinase receptor signaling pathway (GO:0038063)	12	6	0.77	+	7.84	0.000455	0.0154
regulation of vasculature development (GO:1901342)	281	35	17.91	+	1.95	0.000456	0.0154
positive regulation of establishment of protein localization (GO:1904951)	345	41	21.99	+	1.86	0.000458	0.0154
positive regulation of smooth muscle cell migration (GO:0014911)	38	10	2.42	+	4.13	0.000467	0.0156
semaphorin-plexin signaling pathway (GO:0071526)	38	10	2.42	+	4.13	0.000467	0.0157
regulation of proteolysis (GO:0030162)	734	73	46.79	+	1.56	0.000475	0.0159
regulation of NIK/NF-kappaB signaling (GO:1901222)	98	17	6.25	+	2.72	0.000492	0.0164
myofibril assembly (GO:0030239)	54	12	3.44	+	3.49	0.000494	0.0164
wound healing (GO:0042060)	444	49	28.31	+	1.73	0.000503	0.0167
positive regulation of ion transport (GO:0043270)	709	71	45.2	+	1.57	0.000508	0.0168
positive regulation of nucleobase-containing compound metabolic process (GO:0045935)	1891	160	120.56	+	1.33	0.000508	0.0168
macromolecule catabolic process (GO:0009057)	1046	97	66.69	+	1.45	0.000524	0.0173
positive regulation of anion transport (GO:1903793)	502	54	32	+	1.69	0.000527	0.0174
RNA modification (GO:0009451)	170	1	10.84	-	0.09	0.000529	0.0174
immunoglobulin mediated immune response (GO:0016064)	201	2	12.81	-	0.16	0.000543	0.0178
B cell mediated immunity (GO:0019724)	204	2	13.01	-	0.15	0.00055	0.018
regulation of actin filament-based movement (GO:1903115)	39	10	2.49	+	4.02	0.000555	0.0181
response to reactive oxygen species (GO:0000302)	198	27	12.62	+	2.14	0.000566	0.0185
telencephalon development (GO:0021537)	252	32	16.07	+	1.99	0.000578	0.0188
mesenchyme development (GO:0060485)	218	29	13.9	+	2.09	0.000594	0.0193
negative regulation of supramolecular fiber organization (GO:1902904)	154	23	9.82	+	2.34	0.000598	0.0194
regulated exocytosis (GO:0045055)	693	69	44.18	+	1.56	0.0006	0.0194
synapse assembly (GO:0007416)	100	17	6.38	+	2.67	0.000602	0.0194
regulation of MAPK cascade (GO:0043408)	694	69	44.24	+	1.56	0.00061	0.0196
cellular macromolecule catabolic process (GO:0044265)	912	86	58.14	+	1.48	0.000626	0.0201
cellular response to acid chemical (GO:0071229)	73	14	4.65	+	3.01	0.000636	0.0204
regulation of epithelial cell proliferation (GO:0050678)	342	40	21.8	+	1.83	0.000651	0.0208
positive regulation of neurogenesis (GO:0050769)	221	29	14.09	+	2.06	0.000662	0.0211
protein ubiquitination (GO:0016567)	741	73	47.24	+	1.55	0.000664	0.0212
negative regulation of cellular protein localization (GO:1903828)	116	19	7.4	+	2.57	0.000678	0.0215
regulation of system process (GO:0044057)	583	60	37.17	+	1.61	0.000691	0.0219
gliogenesis (GO:0042063)	222	29	14.15	+	2.05	0.000689	0.0219
cellular component assembly involved in morphogenesis (GO:0010927)	92	16	5.87	+	2.73	0.000694	0.0219
cardiac septum morphogenesis (GO:0060411)	65	13	4.14	+	3.14	0.000698	0.022
ossification (GO:0001503)	262	33	16.7	+	1.98	0.000712	0.0224
small GTPase mediated signal transduction (GO:0007264)	262	33	16.7	+	1.98	0.000712	0.0224
regulation of anion transport (GO:0044070)	860	82	54.83	+	1.5	0.000718	0.0225
positive regulation of proteolysis (GO:0045862)	370	42	23.59	+	1.78	0.000735	0.0228
protein phosphorylation (GO:0006468)	684	68	43.61	+	1.56	0.000729	0.0228
regulation of BMP signaling pathway (GO:0030510)	102	17	6.5	+	2.61	0.000734	0.0228
cell cycle (GO:0007049)	1390	122	88.62	+	1.38	0.000731	0.0228
heart process (GO:0003015)	102	17	6.5	+	2.61	0.000734	0.0229
dichotomous subdivision of terminal units involved in salivary gland branching (GO:0060666)	4	4	0.26	+	15.69	0.00074	0.0229
regulation of microtubule cytoskeleton organization (GO:0070507)	141	21	8.99	+	2.34	0.000746	0.0231
embryonic morphogenesis (GO:0048598)	561	58	35.77	+	1.62	0.000753	0.0232
circulatory system process (GO:0003013)	476	51	30.35	+	1.68	0.000759	0.0234
regulation of protein kinase activity (GO:0045859)	797	77	50.81	+	1.52	0.000775	0.0238
negative regulation of transport (GO:0051051)	427	47	27.22	+	1.73	0.000791	0.0243
humoral immune response mediated by circulating immunoglobulin (GO:0002455)	167	1	10.65	-	0.09	0.000812	0.0249
macromolecule metabolic process (GO:0043170)	6193	453	394.82	+	1.15	0.000822	0.0251
positive regulation of nervous system development (GO:0051962)	268	33	17.09	+	1.93	0.000825	0.0252
regulation of metallopeptidase activity (GO:1905048)	14	6	0.89	+	6.72	0.000857	0.026
heterotypic cell-cell adhesion (GO:0034113)	34	9	2.17	+	4.15	0.000858	0.026
COPII-coated vesicle cargo loading (GO:0090110)	14	6	0.89	+	6.72	0.000857	0.0261
actin cytoskeleton reorganization (GO:0031532)	67	13	4.27	+	3.04	0.000893	0.027
negative regulation of protein modification process (GO:0031400)	549	57	35	+	1.63	0.000898	0.0271
neuromuscular junction development (GO:0007528)	42	10	2.68	+	3.73	0.000908	0.0274
positive regulation of macromolecule biosynthetic process (GO:0010557)	1853	155	118.13	+	1.31	0.000933	0.0281
response to stress (GO:0006950)	3634	280	231.68	+	1.21	0.000936	0.0281
organelle localization (GO:0051640)	616	62	39.27	+	1.58	0.00095	0.0285
response to mechanical stimulus (GO:0009612)	216	28	13.77	+	2.03	0.000955	0.0286
positive regulation of phosphate metabolic process (GO:0045937)	989	91	63.05	+	1.44	0.000976	0.029
positive regulation of phosphorus metabolic process (GO:0010562)	989	91	63.05	+	1.44	0.000976	0.0291
homotypic cell-cell adhesion (GO:0034109)	59	12	3.76	+	3.19	0.000974	0.0291
ephrin receptor signaling pathway (GO:0048013)	86	15	5.48	+	2.74	0.000981	0.0292
heterocycle metabolic process (GO:0046483)	2904	143	185.14	-	0.77	0.000985	0.0292
morphogenesis of a branching structure (GO:0001763)	165	23	10.52	+	2.19	0.00102	0.03
cellular response to external stimulus (GO:0071496)	342	39	21.8	+	1.79	0.00102	0.0301
platelet-derived growth factor receptor signaling pathway (GO:0048008)	35	9	2.23	+	4.03	0.00102	0.0301
positive regulation of phosphorylation (GO:0042327)	913	85	58.21	+	1.46	0.00102	0.0301
response to amino acid (GO:0043200)	111	18	7.08	+	2.54	0.00103	0.0302
ventricular cardiac muscle tissue development (GO:0003229)	51	11	3.25	+	3.38	0.00104	0.0303
negative regulation of phosphorylation (GO:0042326)	395	44	25.18	+	1.75	0.00104	0.0304
positive regulation of cellular biosynthetic process (GO:0031328)	1956	162	124.7	+	1.3	0.00104	0.0304
response to oxidative stress (GO:0006979)	396	44	25.25	+	1.74	0.00105	0.0305
negative regulation of neuron projection development (GO:0010977)	135	20	8.61	+	2.32	0.00105	0.0306
Golgi organization (GO:0007030)	135	20	8.61	+	2.32	0.00105	0.0306
metabolic process (GO:0008152)	8333	592	531.26	+	1.11	0.00106	0.0307
cell communication involved in cardiac conduction (GO:0086065)	43	10	2.74	+	3.65	0.00106	0.0307
establishment of organelle localization (GO:0051656)	397	44	25.31	+	1.74	0.00106	0.0307
hippo signaling (GO:0035329)	28	8	1.79	+	4.48	0.00109	0.0314
response to organic cyclic compound (GO:0014070)	886	83	56.49	+	1.47	0.00109	0.0314
neurotrophin signaling pathway (GO:0038179)	28	8	1.79	+	4.48	0.00109	0.0314
regulation of small GTPase mediated signal transduction (GO:0051056)	327	38	20.85	+	1.82	0.00111	0.0317
dendrite morphogenesis (GO:0048813)	60	12	3.83	+	3.14	0.00111	0.0317
regulation of protein localization to cell periphery (GO:1904375)	125	19	7.97	+	2.38	0.00113	0.0322
maintenance of protein location (GO:0045185)	97	16	6.18	+	2.59	0.00114	0.0324
collagen-activated signaling pathway (GO:0038065)	15	6	0.96	+	6.27	0.00114	0.0324
regulation of actomyosin structure organization (GO:0110020)	97	16	6.18	+	2.59	0.00114	0.0325
regulation of integrin-mediated signaling pathway (GO:2001044)	15	6	0.96	+	6.27	0.00114	0.0325
production of molecular mediator of immune response (GO:0002440)	159	1	10.14	-	0.1	0.00115	0.0325
aorta development (GO:0035904)	52	11	3.32	+	3.32	0.00119	0.0336
complement activation, classical pathway (GO:0006958)	161	1	10.26	-	0.1	0.0012	0.0337
positive regulation of vasculature development (GO:1904018)	156	22	9.95	+	2.21	0.00121	0.0339
positive regulation of catabolic process (GO:0009896)	460	49	29.33	+	1.67	0.0012	0.0339
positive regulation of angiogenesis (GO:0045766)	156	22	9.95	+	2.21	0.00121	0.0339
cell-matrix adhesion (GO:0007160)	126	19	8.03	+	2.37	0.00121	0.034
cardiac atrium development (GO:0003230)	36	9	2.3	+	3.92	0.00121	0.034
plasma membrane organization (GO:0007009)	98	16	6.25	+	2.56	0.00126	0.0351
export from cell (GO:0140352)	996	91	63.5	+	1.43	0.00127	0.0354
regulation of actin polymerization or depolymerization (GO:0008064)	189	25	12.05	+	2.07	0.00128	0.0355
positive regulation of transferase activity (GO:0051347)	687	67	43.8	+	1.53	0.0013	0.0361
cellular metabolic process (GO:0044237)	7570	541	482.61	+	1.12	0.00131	0.0363
actin-mediated cell contraction (GO:0070252)	89	15	5.67	+	2.64	0.00133	0.0366
regulation of vascular associated smooth muscle cell migration (GO:1904752)	22	7	1.4	+	4.99	0.00133	0.0367
regulation of stress fiber assembly (GO:0051492)	89	15	5.67	+	2.64	0.00133	0.0367
regulation of establishment of cell polarity (GO:2000114)	22	7	1.4	+	4.99	0.00133	0.0368
regulation of actin filament length (GO:0030832)	190	25	12.11	+	2.06	0.00134	0.0368
positive regulation of cellular catabolic process (GO:0031331)	390	43	24.86	+	1.73	0.00138	0.0378
dendritic spine maintenance (GO:0097062)	10	5	0.64	+	7.84	0.00139	0.038
regulation of protein polymerization (GO:0032271)	232	29	14.79	+	1.96	0.0014	0.0383
myotube differentiation (GO:0014902)	62	12	3.95	+	3.04	0.00142	0.0386
positive regulation of protein localization to plasma membrane (GO:1903078)	62	12	3.95	+	3.04	0.00142	0.0386
ventricular cardiac muscle tissue morphogenesis (GO:0055010)	45	10	2.87	+	3.49	0.00143	0.0388
ion transport (GO:0006811)	2881	226	183.67	+	1.23	0.00145	0.0395
positive regulation of vascular associated smooth muscle cell migration (GO:1904754)	16	6	1.02	+	5.88	0.00149	0.0403
proteasome-mediated ubiquitin-dependent protein catabolic process (GO:0043161)	323	37	20.59	+	1.8	0.00153	0.0414
regulation of ATPase activity (GO:0043462)	81	14	5.16	+	2.71	0.00154	0.0416
cytosolic transport (GO:0016482)	148	21	9.44	+	2.23	0.00155	0.0417
positive regulation of Wnt signaling pathway (GO:0030177)	180	24	11.48	+	2.09	0.00155	0.0417
response to inorganic substance (GO:0010035)	542	55	34.55	+	1.59	0.00156	0.0417
secretion by cell (GO:0032940)	948	87	60.44	+	1.44	0.00155	0.0417
positive regulation of biosynthetic process (GO:0009891)	1990	163	126.87	+	1.28	0.00158	0.0424
membrane organization (GO:0061024)	956	87	60.95	+	1.43	0.00165	0.0437
atrial septum development (GO:0003283)	23	7	1.47	+	4.77	0.00164	0.0437
regulation of protein stability (GO:0031647)	303	35	19.32	+	1.81	0.00164	0.0438
response to muscle stretch (GO:0035994)	23	7	1.47	+	4.77	0.00164	0.0438
negative chemotaxis (GO:0050919)	46	10	2.93	+	3.41	0.00164	0.0439
response to insulin (GO:0032868)	237	29	15.11	+	1.92	0.00167	0.0443
stem cell development (GO:0048864)	82	14	5.23	+	2.68	0.00171	0.0452
negative regulation of intracellular signal transduction (GO:1902532)	492	51	31.37	+	1.63	0.00172	0.0455
positive regulation of transcription by RNA polymerase II (GO:0045944)	1206	106	76.89	+	1.38	0.00176	0.0463
IRE1-mediated unfolded protein response (GO:0036498)	55	11	3.51	+	3.14	0.00176	0.0463
secretion (GO:0046903)	1061	95	67.64	+	1.4	0.00176	0.0463
cellular amide metabolic process (GO:0043603)	808	30	51.51	-	0.58	0.00177	0.0465
pallium development (GO:0021543)	169	23	10.77	+	2.13	0.0018	0.0472
bone development (GO:0060348)	184	24	11.73	+	2.05	0.00186	0.0487
negative regulation of protein-containing complex assembly (GO:0031333)	138	20	8.8	+	2.27	0.00187	0.0488
neuron recognition (GO:0008038)	47	10	3	+	3.34	0.00189	0.0491
regulation of fibroblast growth factor receptor signaling pathway (GO:0040036)	31	8	1.98	+	4.05	0.00189	0.0491
mesenchymal cell development (GO:0014031)	83	14	5.29	+	2.65	0.00189	0.0491
endothelial cell differentiation (GO:0045446)	83	14	5.29	+	2.65	0.00189	0.0492
glial cell differentiation (GO:0010001)	171	23	10.9	+	2.11	0.00192	0.0497
glomerular visceral epithelial cell development (GO:0072015)	11	5	0.7	+	7.13	0.00192	0.0498
respiratory electron transport chain (GO:0022904)	108	0	6.89	-	< 0.01	0.00194	0.05

## Sheet: seg2 > seg1 pathways
signaling pathways identified in GO term analysis: epicardial segment 2 > common progenitor segment 1
GO biological process complete - pathways	Homo sapiens - REFLIST (20595)	#genes	upload_1 (expected)	upload_1 (over/under)	upload_1 (fold Enrichment)	upload_1 (raw P-value)	FDR	-log10(P)	Genes	FDR		as shown in Figure 5
transmembrane receptor protein tyrosine kinase signaling pathway (GO:0007169)	519	76	33.09	+	2.3	3.93e-10	6.59e-08	7.18111	GO:0007169	6.59e-08
G protein-coupled receptor signaling pathway (GO:0007186)	1329	52	84.73	-	0.61	0.00017	0.00675	2.1707	GO:0007186	0.00675
regulation of Wnt signaling pathway (GO:0030111)	366	50	23.33	+	2.14	2.97e-06	0.00019	3.72125	GO:0030111	0.00019
regulation of canonical Wnt signaling pathway (GO:0060828)	288	37	18.36	+	2.02	0.000208	0.00806	2.09366	GO:0060828	0.00806
regulation of transmembrane receptor protein serine/threonine kinase signaling pathway (GO:0090092)	251	36	16	+	2.25	2.59e-05	0.00131	2.88273	GO:0090092	0.00131
regulation of protein kinase B signaling (GO:0051896)	237	35	15.11	+	2.32	2.46e-05	0.00127	2.8962	GO:0051896	0.00127
positive regulation of protein kinase B signaling (GO:0051897)	181	27	11.54	+	2.34	0.000164	0.00655	2.18376	GO:0051897	0.00655
regulation of transforming growth factor beta receptor signaling pathway (GO:0017015)	121	24	7.71	+	3.11	5.46e-06	0.000329	3.4828	GO:0017015	0.000329
positive regulation of Wnt signaling pathway (GO:0030177)	180	24	11.48	+	2.09	0.00155	0.0417	1.37986	GO:0030177	0.0417
vascular endothelial growth factor receptor signaling pathway (GO:0048010)	71	21	4.53	+	4.64	8.71e-08	8.43e-06	5.07417	GO:0048010	8.43e-06
integrin-mediated signaling pathway (GO:0007229)	98	18	6.25	+	2.88	0.000184	0.00723	2.14086	GO:0007229	0.00723
ERAD pathway (GO:0036503)	90	17	5.74	+	2.96	0.000205	0.00798	2.098	GO:0036503	0.00798
regulation of NIK/NF-kappaB signaling (GO:1901222)	98	17	6.25	+	2.72	0.000492	0.0164	1.78516	GO:1901222	0.0164
regulation of BMP signaling pathway (GO:0030510)	102	17	6.5	+	2.61	0.000734	0.0228	1.64207	GO:0030510	0.0228
negative regulation of transforming growth factor beta receptor signaling pathway (GO:0030512)	82	16	5.23	+	3.06	0.000227	0.00862	2.06449	GO:0030512	0.00862
ubiquitin-dependent ERAD pathway (GO:0030433)	75	15	4.78	+	3.14	0.00028	0.0101	1.99568	GO:0030433	0.0101
ephrin receptor signaling pathway (GO:0048013)	86	15	5.48	+	2.74	0.000981	0.0292	1.53462	GO:0048013	0.0292
semaphorin-plexin signaling pathway (GO:0071526)	38	10	2.42	+	4.13	0.000467	0.0157	1.8041	GO:0071526	0.0157
platelet-derived growth factor receptor signaling pathway (GO:0048008)	35	9	2.23	+	4.03	0.00102	0.0301	1.52143	GO:0048008	0.0301
hippo signaling (GO:0035329)	28	8	1.79	+	4.48	0.00109	0.0314	1.50307	GO:0035329	0.0314
neurotrophin signaling pathway (GO:0038179)	28	8	1.79	+	4.48	0.00109	0.0314	1.50307	GO:0038179	0.0314
regulation of fibroblast growth factor receptor signaling pathway (GO:0040036)	31	8	1.98	+	4.05	0.00189	0.0491	1.30892	GO:0040036	0.0491
semaphorin-plexin signaling pathway involved in neuron projection guidance (GO:1902285)	13	7	0.83	+	8.45	0.000106	0.00457	2.34008	GO:1902285	0.00457
semaphorin-plexin signaling pathway involved in axon guidance (GO:1902287)	11	6	0.7	+	8.56	0.00032	0.0114	1.9431	GO:1902287	0.0114
collagen-activated tyrosine kinase receptor signaling pathway (GO:0038063)	12	6	0.77	+	7.84	0.000455	0.0154	1.81248	GO:0038063	0.0154
collagen-activated signaling pathway (GO:0038065)	15	6	0.96	+	6.27	0.00114	0.0324	1.48945	GO:0038065	0.0324
regulation of integrin-mediated signaling pathway (GO:2001044)	15	6	0.96	+	6.27	0.00114	0.0325	1.48812	GO:2001044	0.0325
GO biological process complete	#genes	-log10(P)
GO:0007169	76	7.18111
GO:0048010	21	5.07417
GO:0030111	50	3.72125
GO:0017015	24	3.4828
GO:0090092	36	2.88273
GO:1902285	7	2.34008
GO:0007186	52	2.1707
GO:0007229	18	2.14086
GO:0036503	17	2.098
GO:0060828	37	2.09366
GO:0030512	16	2.06449
GO:0030433	15	1.99568
GO:1902287	6	1.9431
GO:0038063	6	1.81248
GO:0071526	10	1.8041
GO:1901222	17	1.78516
GO:0030510	17	1.64207
GO:0048013	15	1.53462
GO:0048008	9	1.52143
GO:0035329	8	1.50307
GO:0038179	8	1.50307
GO:0038065	6	1.48945
GO:2001044	6	1.48812
GO:0030177	24	1.37986
GO:0040036	8	1.30892

## Sheet: seg3 > seg1
DE gene list: myocardial segment 3 > common progenitor segment 1
	AUCPR	AUCPR.ratio	exp.fc	posFrac_1	posFrac_2	nTrans_1	nTrans_2
PDLIM5	0.974	2.47698	2.79264	0.998	0.845	2.802	0.897
TNNT2	0.958	2.43629	2.84135	1	0.77	3.142	1.065
ACTC1	0.953	2.42358	2.79559	1	0.994	5.648	3.014
ACTN2	0.948	2.41086	4.6464	0.946	0.26	2.04	0.169
HSPB1	0.947	2.40832	2.3275	1	0.953	3.213	1.405
MYH6	0.926	2.35491	5.72425	0.864	0.116	2.019	0.081
SLC8A1	0.924	2.34983	3.75506	0.961	0.233	1.531	0.189
SMPX	0.922	2.34474	6.22137	0.797	0.038	1.102	0.022
MYOM1	0.921	2.3422	6.19879	0.802	0.042	1.317	0.029
ACTA2	0.915	2.32694	3.20875	0.987	0.594	3.337	0.989
ATP2A2	0.914	2.3244	2.03048	0.996	0.953	2.606	1.167
MYOZ2	0.914	2.3244	4.14379	0.899	0.138	1.451	0.135
HSPB7	0.914	2.3244	5.55722	0.802	0.064	1.086	0.034
PDLIM3	0.911	2.31677	3.69316	0.974	0.328	2.409	0.415
MYL7	0.909	2.31168	1.79475	1	0.971	3.785	2.228
LGI2	0.908	2.30914	3.79935	0.905	0.236	1.511	0.18
PPP1R12B	0.905	2.30151	3.80634	0.892	0.264	1.353	0.152
CAMK2D	0.904	2.29897	2.25844	0.968	0.747	1.739	0.574
CRYAB	0.903	2.29642	4.92187	0.83	0.108	1.326	0.07
CSRP3	0.903	2.29642	5.73286	0.806	0.082	1.803	0.066
NEBL	0.9	2.28879	2.44801	0.961	0.732	2.289	0.776
UNC45B	0.898	2.28371	4.10041	0.823	0.168	1.047	0.087
NES	0.891	2.26591	2.36124	0.968	0.742	2.103	0.715
CMYA5	0.89	2.26336	3.25947	0.903	0.391	1.567	0.269
POPDC2	0.89	2.26336	4.57932	0.784	0.126	1.164	0.073
TNNC1	0.882	2.24302	3.55972	0.897	0.37	1.571	0.223
TTN	0.882	2.24302	2.17864	1	0.965	4.34	2.393
MYL9	0.881	2.24047	1.33393	0.996	0.973	2.817	1.765
CDH2	0.88	2.23793	1.79378	0.983	0.839	1.657	0.697
SORBS2	0.878	2.23284	3.33767	0.886	0.346	1.639	0.274
MYOCD	0.875	2.22522	3.34303	0.856	0.278	1.256	0.185
ABLIM1	0.874	2.22267	2.23025	0.942	0.623	1.351	0.412
LMO7	0.874	2.22267	4.15117	0.778	0.108	0.863	0.065
MYL4	0.871	2.21504	2.21549	0.959	0.737	2.191	0.822
TPM1	0.869	2.20996	0.953319	1	0.999	4.315	3.428
COL4A2	0.868	2.20741	2.0889	0.991	0.753	2.038	0.791
SLIT2	0.868	2.20741	3.7542	0.825	0.172	1.158	0.126
MYH11	0.867	2.20487	6.24376	0.666	0.054	1.217	0.025
MYBPC3	0.867	2.20487	5.70858	0.655	0.053	0.88	0.023
NPTN	0.866	2.20233	1.63195	0.966	0.835	1.507	0.673
CRIP2	0.861	2.18961	2.80798	0.912	0.314	1.148	0.231
PAM	0.861	2.18961	1.67874	0.968	0.841	1.614	0.717
SYNPO2L	0.861	2.18961	4.00078	0.795	0.203	1.429	0.145
COL4A1	0.86	2.18707	2.60558	0.97	0.483	1.649	0.434
TSPAN2	0.858	2.18198	3.09908	0.817	0.27	0.875	0.134
PRDX1	0.855	2.17435	1.29592	0.998	0.996	2.87	1.836
SLC25A4	0.855	2.17435	2.40883	0.888	0.628	1.368	0.376
UGP2	0.855	2.17435	1.62595	0.966	0.884	1.743	0.816
ANKRD1	0.854	2.17181	4.09593	0.793	0.214	2.019	0.237
DDAH1	0.848	2.15655	2.9019	0.875	0.346	1.308	0.26
MASP1	0.847	2.15401	4.56173	0.7	0.095	1.109	0.069
FILIP1	0.846	2.15147	2.91533	0.849	0.242	0.976	0.174
TRDN	0.846	2.15147	3.94219	0.728	0.141	0.873	0.076
PFKP	0.845	2.14892	1.85803	0.942	0.732	1.663	0.676
GSTO1	0.844	2.14638	1.79335	0.966	0.845	1.715	0.73
MYO18B	0.842	2.14129	4.63663	0.634	0.038	0.467	0.022
MYOF	0.841	2.13875	2.46714	0.866	0.503	1.29	0.335
PALLD	0.84	2.13621	1.55099	0.97	0.887	1.784	0.875
SLC47A1	0.835	2.12349	3.44176	0.767	0.154	0.896	0.11
ZAK	0.834	2.12095	1.91988	0.912	0.69	1.267	0.456
CSRP1	0.832	2.11586	2.2819	0.972	0.698	2.29	0.848
DOK4	0.828	2.10569	2.5865	0.946	0.362	1.471	0.373
ISL1	0.828	2.10569	3.46514	0.765	0.186	1.082	0.139
ACTN4	0.825	2.09806	1.48482	0.974	0.951	2.268	1.241
CFL2	0.824	2.09552	1.45602	0.966	0.83	1.417	0.686
SPINT2	0.823	2.09297	1.33902	0.991	0.92	1.878	1.041
SYTL5	0.822	2.09043	4.3855	0.595	0.068	0.54	0.031
SYNM	0.821	2.08789	4.51125	0.578	0.056	0.484	0.025
CORO6	0.82	2.08534	3.6433	0.675	0.117	0.571	0.055
RASL11B	0.818	2.08026	2.85967	0.774	0.359	0.97	0.179
TRH	0.817	2.07772	3.79438	0.692	0.103	0.944	0.093
FHL1	0.814	2.07009	2.2744	0.894	0.589	1.456	0.444
SIPA1L2	0.814	2.07009	1.89714	0.914	0.623	1.16	0.413
CNN1	0.812	2.065	2.4265	0.899	0.416	1.209	0.315
HSPB8	0.812	2.065	2.94935	0.782	0.232	0.88	0.149
LIMS1	0.812	2.065	2.06085	0.886	0.654	1.269	0.42
RFTN1	0.81	2.05991	2.80509	0.849	0.214	0.964	0.184
RCSD1	0.81	2.05991	2.81406	0.791	0.258	0.833	0.152
PPARGC1A	0.809	2.05737	4.74423	0.517	0.041	0.398	0.017
CASZ1	0.808	2.05483	3.22786	0.69	0.147	0.598	0.077
NEXN	0.808	2.05483	1.77137	0.873	0.665	1.18	0.455
TMEM71	0.808	2.05483	4.11726	0.591	0.047	0.711	0.052
MSRB3	0.807	2.05228	2.22612	0.875	0.413	0.894	0.243
BVES	0.806	2.04974	2.96081	0.718	0.221	0.667	0.105
LDB3	0.806	2.04974	3.66511	0.7	0.177	1.024	0.113
MYL12A	0.805	2.0472	1.3123	0.972	0.937	1.836	1.025
SNAP25	0.804	2.04466	4.32645	0.554	0.074	0.493	0.029
SLC20A2	0.803	2.04211	2.92404	0.722	0.244	0.669	0.108
SPRY4	0.803	2.04211	4.34588	0.537	0.028	0.469	0.027
CALD1	0.802	2.03957	1.20921	0.985	0.972	2.547	1.63
TGFB1I1	0.801	2.03703	2.85395	0.806	0.193	0.764	0.133
THBS1	0.801	2.03703	4.14496	0.657	0.141	1.24	0.107
TRIM55	0.801	2.03703	2.70589	0.741	0.331	0.824	0.161
ADPRHL1	0.8	2.03448	5.12642	0.502	0.053	0.573	0.02
SLC16A12	0.799	2.03194	2.77403	0.739	0.271	0.672	0.12
TAGLN	0.799	2.03194	1.8583	0.985	0.848	3.122	1.644
GATM	0.798	2.0294	4.32743	0.565	0.043	0.832	0.055
ASAH1	0.797	2.02685	1.8069	0.886	0.686	1.179	0.445
SAMD4A	0.797	2.02685	2.80942	0.746	0.246	0.755	0.135
IGFBP7	0.794	2.01922	2.74312	0.795	0.131	1.3	0.285
ITGAV	0.794	2.01922	1.82871	0.92	0.689	1.289	0.492
PRKAG2	0.794	2.01922	2.76968	0.744	0.233	0.604	0.106
REEP1	0.794	2.01922	4.17029	0.528	0.07	0.436	0.028
ACTA1	0.793	2.01668	4.18399	0.787	0.186	2.045	0.229
TNNI1	0.793	2.01668	1.52124	0.998	0.859	2.444	1.349
PCDH7	0.792	2.01414	1.26431	0.978	0.872	1.796	1.021
ITGA1	0.791	2.01159	2.42195	0.823	0.422	1.121	0.286
LTBP1	0.791	2.01159	1.86887	0.888	0.588	1.009	0.353
ALDH3A2	0.789	2.00651	1.69544	0.92	0.795	1.428	0.606
EEF1A2	0.789	2.00651	4.24986	0.519	0.07	0.499	0.031
FAT1	0.789	2.00651	1.81188	0.905	0.638	1.15	0.43
PPIC	0.789	2.00651	2.2153	0.819	0.405	0.795	0.212
CACNB2	0.788	2.00397	3.47537	0.591	0.099	0.427	0.044
PELO	0.787	2.00142	1.82733	0.888	0.694	1.28	0.488
ATP2B4	0.786	1.99888	1.37941	0.953	0.849	1.475	0.752
SNTA1	0.786	1.99888	2.4821	0.75	0.314	0.658	0.142
CKB	0.785	1.99634	1.79559	0.94	0.726	1.741	0.744
BZW2	0.783	1.99125	1.31523	0.933	0.825	1.255	0.639
XIRP1	0.783	1.99125	2.61908	0.793	0.384	1.166	0.266
MALAT1	0.781	1.98616	1.23402	1	0.986	4.312	3.173
LIMCH1	0.78	1.98362	2.77533	0.739	0.223	0.768	0.141
LIMS2	0.78	1.98362	3.28802	0.616	0.102	0.442	0.052
ACTN1	0.778	1.97853	1.3967	0.976	0.948	2.266	1.291
CGNL1	0.778	1.97853	1.74734	0.927	0.622	1.33	0.537
MRAS	0.778	1.97853	2.14533	0.782	0.391	0.717	0.196
FAM127A	0.777	1.97599	1.10305	0.963	0.878	1.332	0.771
PCGF5	0.777	1.97599	2.78588	0.688	0.226	0.59	0.102
PRICKLE1	0.777	1.97599	2.11466	0.832	0.397	0.835	0.24
HCN4	0.776	1.97345	2.16451	0.933	0.425	1.359	0.432
RBM24	0.776	1.97345	1.65667	0.873	0.682	1.127	0.46
CDC42EP3	0.774	1.96836	1.75772	0.955	0.623	1.43	0.586
CLIC4	0.774	1.96836	1.16389	0.974	0.898	1.483	0.849
MXRA7	0.773	1.96582	1.07137	0.981	0.912	1.458	0.873
ATXN1	0.771	1.96073	2.65195	0.741	0.204	0.583	0.11
DUSP6	0.771	1.96073	3.23203	0.636	0.14	0.701	0.093
MACF1	0.771	1.96073	1.19013	0.946	0.867	1.497	0.847
TSPAN13	0.771	1.96073	2.20193	0.769	0.468	0.874	0.24
PDK1	0.77	1.95819	1.52111	0.929	0.754	1.373	0.636
SSPN	0.769	1.95565	3.25644	0.584	0.098	0.419	0.05
ZFP36L1	0.768	1.9531	1.22583	0.987	0.962	2.148	1.303
RPS6KA2	0.765	1.94547	2.7998	0.692	0.196	0.629	0.109
MEF2A	0.764	1.94293	1.37106	0.897	0.729	1.04	0.494
PLN	0.764	1.94293	1.8581	0.916	0.557	1.457	0.567
DKK1	0.763	1.94039	3.47651	0.595	0.102	0.981	0.121
FABP3	0.763	1.94039	2.9017	0.681	0.124	0.545	0.086
DES	0.763	1.94039	3.70691	0.539	0.089	0.574	0.053
SVIL	0.759	1.93022	1.58145	0.886	0.669	1.077	0.455
CTGF	0.758	1.92767	3.24007	0.748	0.461	1.849	0.351
DSTN	0.758	1.92767	0.794777	0.981	0.961	1.746	1.237
MGST3	0.757	1.92513	1.30932	0.968	0.894	1.536	0.821
GMPR	0.756	1.92259	3.1835	0.562	0.142	0.457	0.058
DGKI	0.755	1.92004	2.39316	0.744	0.353	0.906	0.222
ADAM19	0.754	1.9175	1.74506	0.838	0.623	1.061	0.405
BEX1	0.753	1.91496	1.59707	0.972	0.754	1.831	0.884
TNFRSF12A	0.752	1.91241	2.46158	0.733	0.324	0.988	0.237
FHOD3	0.75	1.90733	2.86744	0.614	0.151	0.48	0.076
CAV2	0.749	1.90478	2.16855	0.746	0.434	0.856	0.239
FZD1	0.749	1.90478	2.593	0.718	0.237	0.72	0.147
LSAMP	0.749	1.90478	2.84428	0.657	0.127	0.569	0.094
CYCS	0.748	1.90224	0.929055	0.97	0.916	1.624	1.066
SH3GLB1	0.748	1.90224	1.05215	0.966	0.94	1.691	1.053
TRIB1	0.748	1.90224	2.76616	0.647	0.189	0.544	0.094
ATP1B2	0.745	1.89461	1.70609	0.881	0.603	1.068	0.418
ITGB1	0.745	1.89461	0.765372	0.991	0.993	2.255	1.687
PLOD2	0.745	1.89461	1.33444	0.918	0.743	1.082	0.529
GNG12	0.744	1.89207	1.71974	0.886	0.574	0.986	0.376
POPDC3	0.744	1.89207	2.43618	0.705	0.242	0.587	0.128
RBFOX2	0.744	1.89207	0.902783	0.987	0.941	1.669	1.115
ETV1	0.743	1.88953	2.69893	0.696	0.12	0.649	0.121
SPTBN1	0.743	1.88953	1.17006	0.97	0.832	1.392	0.784
TIMP3	0.743	1.88953	3.25801	0.543	0.117	0.513	0.063
LAPTM4B	0.741	1.88444	1.01094	0.994	0.939	1.992	1.309
MAP2K1	0.741	1.88444	1.64122	0.832	0.732	1.187	0.495
PALM2	0.74	1.8819	2.49854	0.649	0.232	0.538	0.111
DIXDC1	0.739	1.87935	1.84363	0.776	0.522	0.793	0.268
EPS8	0.738	1.87681	2.62774	0.679	0.141	0.557	0.106
PTRF	0.737	1.87427	2.68244	0.606	0.184	0.523	0.095
GNG5	0.736	1.87172	0.652742	0.994	0.993	2.058	1.591
FNBP1	0.735	1.86918	1.56155	0.828	0.591	0.806	0.326
CCDC50	0.734	1.86664	1.34401	0.909	0.774	1.135	0.557
GPR37	0.734	1.86664	2.66428	0.606	0.207	0.541	0.1
MAGI2-AS3	0.734	1.86664	1.99307	0.849	0.415	0.887	0.279
TP53INP2	0.734	1.86664	2.06171	0.754	0.377	0.729	0.211
CRIM1	0.733	1.86409	2.16037	0.761	0.434	0.864	0.243
COL4A5	0.732	1.86155	1.22601	0.944	0.817	1.207	0.641
MAP4	0.732	1.86155	0.965656	0.95	0.906	1.408	0.885
SLIT3	0.732	1.86155	2.53635	0.7	0.189	0.658	0.137
DPP7	0.73	1.85647	2.6111	0.623	0.159	0.455	0.085
SPATS2L	0.73	1.85647	1.53387	0.864	0.627	0.943	0.399
TMEM47	0.73	1.85647	1.84021	0.804	0.56	0.953	0.335
ATP13A3	0.729	1.85392	1.42132	0.886	0.733	1.084	0.504
ARID5B	0.728	1.85138	2.78588	0.603	0.155	0.59	0.102
VCL	0.728	1.85138	1.13552	0.966	0.892	1.645	0.977
SORT1	0.725	1.84375	1.47963	0.838	0.608	0.88	0.38
ADAM9	0.724	1.84121	1.77202	0.832	0.5	0.823	0.293
VLDLR	0.724	1.84121	2.81995	0.543	0.123	0.367	0.058
ATP1B1	0.723	1.83866	1.57507	0.83	0.64	0.979	0.407
GUCY1A2	0.721	1.83358	2.67086	0.608	0.144	0.661	0.126
VCAN	0.721	1.83358	1.05804	0.998	0.934	2.466	1.666
XPR1	0.721	1.83358	1.57936	0.83	0.694	1.019	0.426
CTHRC1	0.718	1.82595	2.52447	0.657	0.239	0.823	0.181
GABRB2	0.717	1.82341	2.81833	0.524	0.142	0.477	0.078
HK1	0.717	1.82341	1.26737	0.901	0.725	1.047	0.529
KANK1	0.715	1.81832	2.28444	0.685	0.237	0.549	0.131
JPH2	0.714	1.81578	2.46113	0.562	0.176	0.34	0.068
MYL3	0.714	1.81578	3.64389	0.506	0.18	0.753	0.077
AKAP12	0.713	1.81323	1.10048	0.966	0.94	2.057	1.307
BMP2	0.713	1.81323	1.72784	0.83	0.61	1.385	0.572
RIN2	0.713	1.81323	2.19557	0.679	0.299	0.607	0.156
TNFRSF21	0.713	1.81323	1.66056	0.81	0.581	0.957	0.376
DNAJC15	0.712	1.81069	1.12077	0.966	0.887	1.9	1.174
RHOQ	0.711	1.80815	1.30028	0.901	0.686	0.943	0.459
ZNF704	0.711	1.80815	1.89857	0.7	0.377	0.617	0.193
GYG1	0.71	1.8056	1.50478	0.899	0.689	1.178	0.531
MAP1B	0.71	1.8056	0.809991	0.989	0.964	2.295	1.691
CYR61	0.708	1.80052	2.24973	0.75	0.406	1.2	0.348
ATP5G3	0.707	1.79797	0.599666	0.981	0.99	2.046	1.616
PICALM	0.707	1.79797	1.29925	0.828	0.707	0.916	0.444
SH3GL3	0.707	1.79797	2.04175	0.666	0.327	0.556	0.156
CCND1	0.706	1.79543	2.67287	0.543	0.113	0.501	0.091
MYL6	0.706	1.79543	0.553	1	0.999	2.876	2.412
ASAP1	0.704	1.79034	1.28336	0.856	0.662	0.857	0.415
PEA15	0.704	1.79034	1.05287	0.94	0.845	1.342	0.799
SMYD1	0.704	1.79034	1.66398	0.782	0.5	0.965	0.379
CREB5	0.703	1.7878	2.46291	0.606	0.148	0.588	0.126
FLNB	0.703	1.7878	1.34333	0.847	0.855	1.452	0.752
TECRL	0.703	1.7878	1.4299	0.989	0.645	2.483	1.435
RABGAP1L	0.702	1.78526	1.97444	0.694	0.351	0.612	0.182
PRKAR1A	0.7	1.78017	0.662435	0.978	0.961	1.717	1.29
FZD7	0.699	1.77763	1.30223	0.828	0.765	1.169	0.591
INPP5A	0.699	1.77763	1.55743	0.769	0.479	0.607	0.236
RAB3IP	0.699	1.77763	1.51021	0.828	0.612	0.904	0.385
RGS5	0.699	1.77763	1.62268	0.888	0.568	1.406	0.619
RYR2	0.699	1.77763	1.62873	0.795	0.56	0.95	0.38
COL4A6	0.698	1.77509	1.58279	0.806	0.556	0.798	0.318
PTPLA	0.697	1.77254	1.20918	0.808	0.733	1.102	0.581
SPON1	0.696	1.77	1.8297	0.713	0.388	0.737	0.248
HSD17B12	0.695	1.76746	0.889523	0.94	0.878	1.29	0.832
MITF	0.695	1.76746	2.29604	0.608	0.256	0.56	0.133
TBX5	0.694	1.76491	1.50052	0.871	0.546	1.035	0.455
WEE1	0.693	1.76237	1.13501	0.925	0.806	1.313	0.745
SPEG	0.692	1.75983	1.70938	0.737	0.454	0.678	0.243
DSC3	0.691	1.75728	2.28515	0.653	0.161	0.707	0.176
DMD	0.69	1.75474	2.34316	0.571	0.189	0.456	0.102
SDC2	0.69	1.75474	1.03708	0.918	0.867	1.372	0.827
EPS15	0.689	1.7522	1.26133	0.86	0.68	0.879	0.433
BMPR2	0.688	1.74966	1.61886	0.784	0.473	0.709	0.271
MICAL2	0.687	1.74711	1.61532	0.948	0.581	1.685	0.785
MEF2C	0.686	1.74457	1.5904	0.793	0.478	0.863	0.347
RBM20	0.685	1.74203	1.50181	0.703	0.464	0.597	0.24
ARHGAP42	0.684	1.73948	1.65928	0.774	0.454	0.69	0.256
FERMT2	0.683	1.73694	0.989706	0.912	0.862	1.188	0.717
ATAD1	0.682	1.7344	1.3344	0.78	0.561	0.631	0.284
GADD45A	0.682	1.7344	1.11458	0.901	0.827	1.317	0.756
PLS3	0.682	1.7344	1.12926	0.884	0.83	1.253	0.707
SORBS1	0.682	1.7344	2.43474	0.526	0.175	0.418	0.087
MYH9	0.681	1.73185	0.76146	0.968	0.979	2.06	1.521
BTG1	0.68	1.72931	1.27071	0.836	0.682	0.948	0.47
GPX7	0.68	1.72931	1.47795	0.737	0.461	0.578	0.235
HTRA1	0.68	1.72931	1.92869	0.666	0.415	0.827	0.267
ATP5J	0.678	1.72422	0.626574	0.989	0.978	1.762	1.35
DNAJC6	0.677	1.72168	1.42244	0.767	0.532	0.726	0.315
USP28	0.677	1.72168	1.20036	0.795	0.666	0.775	0.389
DKK3	0.676	1.71914	1.43449	0.806	0.529	0.777	0.338
MPC1	0.675	1.71659	1.54864	0.718	0.45	0.549	0.212
NID1	0.675	1.71659	1.293	0.804	0.61	0.759	0.359
THSD7A	0.675	1.71659	2.06396	0.655	0.24	0.613	0.172
NUAK1	0.674	1.71405	2.12662	0.599	0.334	0.635	0.172
RRAGD	0.674	1.71405	1.89608	0.644	0.26	0.452	0.136
ARF4	0.672	1.70897	0.665064	0.974	0.951	1.574	1.168
COX7B	0.672	1.70897	0.774613	0.983	0.953	1.494	1.044
IDH3A	0.672	1.70897	2.06413	0.556	0.268	0.423	0.113
TGFB2	0.671	1.70642	1.3085	0.933	0.658	1.355	0.704
VASH1	0.67	1.70388	1.95896	0.644	0.288	0.542	0.16
AUTS2	0.669	1.70134	1.49781	0.707	0.478	0.622	0.252
LHFP	0.668	1.69879	1.809	0.735	0.331	0.678	0.228
ENC1	0.667	1.69625	1.84105	0.677	0.346	0.829	0.283
RAI14	0.667	1.69625	1.27525	0.853	0.668	1.024	0.513
SLC25A12	0.667	1.69625	2.06019	0.565	0.243	0.422	0.113
NDRG2	0.665	1.69116	2.04808	0.55	0.229	0.392	0.105
PTPRD	0.665	1.69116	1.05122	0.933	0.811	1.341	0.799
AKAP13	0.664	1.68862	1.03418	0.86	0.756	0.973	0.556
COL2A1	0.664	1.68862	0.970477	0.931	0.901	2.094	1.416
C5orf24	0.663	1.68608	0.901521	0.918	0.824	1.052	0.655
FBLN2	0.663	1.68608	1.6017	0.754	0.439	0.727	0.282
HIPK2	0.663	1.68608	0.783523	0.935	0.888	1.257	0.854
CAP2	0.662	1.68353	0.66467	0.948	0.944	1.469	1.081
SH3BGRL	0.662	1.68353	0.77538	0.94	0.878	1.162	0.785
SYNJ2	0.662	1.68353	2.02334	0.578	0.246	0.452	0.125
BAMBI	0.661	1.68099	1.00286	0.922	0.851	1.445	0.895
HEG1	0.661	1.68099	1.02171	0.927	0.842	1.528	0.947
MDH1	0.661	1.68099	0.7019	0.942	0.941	1.488	1.077
RGS4	0.661	1.68099	2.62669	0.502	0.173	0.77	0.156
C1orf198	0.66	1.67845	1.1061	0.873	0.797	1.125	0.631
MICAL3	0.66	1.67845	1.90853	0.56	0.254	0.36	0.105
PRKAR2B	0.66	1.67845	2.01297	0.547	0.272	0.42	0.116
MAP1LC3A	0.659	1.67591	1.80871	0.675	0.318	0.546	0.178
TMEM133	0.659	1.67591	1.52461	0.726	0.44	0.607	0.241
TMSB4X	0.659	1.67591	0.857771	0.989	0.996	2.555	1.884
BAALC	0.658	1.67336	2.08195	0.556	0.208	0.468	0.125
LPP	0.656	1.66828	0.880027	0.957	0.902	1.568	1.048
NRP2	0.656	1.66828	1.54718	0.709	0.464	0.825	0.338
ADI1	0.655	1.66573	1.16831	0.828	0.651	0.839	0.434
GLS	0.655	1.66573	1.13892	0.836	0.652	0.789	0.412
LBH	0.655	1.66573	1.91588	0.642	0.278	0.609	0.188
RBPMS	0.655	1.66573	0.511166	0.987	0.971	1.711	1.376
COL18A1	0.653	1.66065	0.834833	0.933	0.895	1.32	0.879
KLF6	0.653	1.66065	1.51718	0.819	0.591	1.174	0.525
MYL12B	0.653	1.66065	0.72752	0.97	0.954	1.507	1.079
PLCL2	0.653	1.66065	2.01896	0.541	0.208	0.365	0.099
RCAN2	0.653	1.66065	1.89246	0.552	0.263	0.424	0.127
ANXA1	0.652	1.6581	2.01361	0.608	0.2	1.007	0.322
ARHGAP1	0.652	1.6581	0.840938	0.907	0.837	1.014	0.65
SEC23A	0.652	1.6581	1.1943	0.817	0.619	0.723	0.361
LGMN	0.65	1.65302	0.876579	0.877	0.823	0.974	0.609
UBR3	0.65	1.65302	1.22898	0.759	0.584	0.647	0.312
POGK	0.649	1.65047	1.1031	0.793	0.624	0.698	0.367
CCDC141	0.648	1.64793	1.37571	0.772	0.541	0.803	0.364
KIFAP3	0.648	1.64793	1.3543	0.748	0.513	0.66	0.295
PHF20L1	0.648	1.64793	0.974585	0.871	0.75	0.923	0.542
AES	0.647	1.64539	0.923571	0.92	0.82	1.082	0.668
ANK2	0.647	1.64539	1.88213	0.547	0.239	0.348	0.103
CHSY1	0.647	1.64539	1.28149	0.759	0.568	0.67	0.314
MOXD1	0.647	1.64539	2.11714	0.532	0.196	0.488	0.128
VTN	0.647	1.64539	1.70027	0.653	0.297	0.492	0.17
NNT	0.646	1.64284	1.1733	0.744	0.599	0.656	0.328
NREP	0.646	1.64284	0.485529	0.985	0.986	2.079	1.724
FN1	0.645	1.6403	1.2509	0.976	0.918	2.257	1.372
DYRK2	0.643	1.63522	1.31394	0.713	0.515	0.61	0.277
CHPF	0.642	1.63267	1.31361	0.688	0.492	0.542	0.243
TMEM87A	0.641	1.63013	0.970746	0.791	0.725	0.819	0.475
HAND2	0.641	1.63013	1.09947	0.903	0.679	1.286	0.741
GOT1	0.64	1.62759	1.02903	0.787	0.703	0.816	0.457
PRSS35	0.64	1.62759	1.96673	0.524	0.215	0.386	0.109
TNS1	0.64	1.62759	1.93591	0.55	0.228	0.429	0.125
CDKN1A	0.639	1.62504	2.21809	0.504	0.149	0.655	0.168
SIRPA	0.639	1.62504	1.96802	0.515	0.175	0.334	0.093
CALU	0.638	1.6225	0.575423	0.976	0.962	1.542	1.191
ZNF608	0.638	1.6225	1.24938	0.787	0.553	0.712	0.343
NRP1	0.637	1.61996	1.15298	0.802	0.623	0.839	0.438
RTN4	0.637	1.61996	0.416504	0.998	0.98	1.967	1.669
EXTL3	0.635	1.61487	1.12034	0.774	0.605	0.677	0.351
FLT1	0.635	1.61487	1.46122	0.791	0.444	0.85	0.369
NRBP2	0.635	1.61487	1.71643	0.606	0.284	0.414	0.139
PDHA1	0.635	1.61487	0.684243	0.869	0.866	1.057	0.742
TNKS2	0.635	1.61487	0.913617	0.825	0.746	0.79	0.472
CPEB4	0.633	1.60978	1.1957	0.772	0.598	0.736	0.368
DENND5B	0.633	1.60978	1.05678	0.815	0.673	0.786	0.431
PSD3	0.633	1.60978	1.54748	0.638	0.408	0.544	0.21
DCBLD2	0.632	1.60724	0.689582	0.927	0.89	1.151	0.813
FERMT1	0.632	1.60724	1.73663	0.58	0.244	0.397	0.131
KIF13A	0.63	1.60216	1.05023	0.86	0.697	0.846	0.47
GLT25D2	0.629	1.59961	1.37372	0.681	0.49	0.701	0.312
LDLR	0.629	1.59961	1.01722	0.778	0.715	0.986	0.57
RICTOR	0.629	1.59961	1.43653	0.649	0.444	0.545	0.226
KCTD10	0.628	1.59707	0.959552	0.793	0.715	0.76	0.44
PTTG1IP	0.628	1.59707	0.511757	0.966	0.962	1.422	1.123
FRMD4B	0.627	1.59453	1.22864	0.866	0.587	0.95	0.483
MYO1D	0.627	1.59453	1.73096	0.556	0.261	0.379	0.125
SBDS	0.627	1.59453	1.38312	0.649	0.402	0.449	0.189
ELL2	0.626	1.59198	1.43296	0.627	0.425	0.498	0.205
MLLT11	0.626	1.59198	0.601291	0.97	0.969	1.579	1.208
PDE10A	0.626	1.59198	1.58153	0.588	0.332	0.439	0.162
TSPAN5	0.626	1.59198	1.5755	0.619	0.338	0.491	0.184
ACSL4	0.625	1.58944	1.2913	0.685	0.503	0.551	0.251
DYNLT1	0.625	1.58944	0.530436	0.968	0.957	1.373	1.071
XPO4	0.624	1.5869	1.30457	0.694	0.568	0.64	0.294
C7orf60	0.623	1.58435	1.70363	0.524	0.295	0.4	0.135
PKIA	0.623	1.58435	1.34081	0.651	0.489	0.573	0.254
REEP3	0.622	1.58181	1.06652	0.739	0.581	0.58	0.306
ATP2C1	0.621	1.57927	0.944622	0.815	0.726	0.757	0.442
MOB1B	0.621	1.57927	1.2428	0.705	0.507	0.559	0.263
RHOC	0.621	1.57927	0.749295	0.903	0.848	1.07	0.726
PKP2	0.62	1.57672	0.714681	0.922	0.862	1.296	0.916
PPP1R14A	0.62	1.57672	1.67854	0.556	0.306	0.439	0.152
HS2ST1	0.619	1.57418	0.86572	0.871	0.791	0.997	0.629
IDI1	0.619	1.57418	0.811123	0.888	0.866	1.363	0.923
COL3A1	0.619	1.57418	1.25302	0.97	0.684	2.438	1.513
ADCY6	0.618	1.57164	1.57915	0.55	0.291	0.353	0.128
BAG3	0.618	1.57164	1.18987	0.713	0.515	0.587	0.287
CDH11	0.618	1.57164	1.26133	0.765	0.573	0.879	0.433
FLNC	0.618	1.57164	0.658776	0.929	0.93	1.32	0.962
MAPKAPK2	0.618	1.57164	0.880402	0.858	0.732	0.788	0.48
PPP1R12A	0.618	1.57164	0.585248	0.905	0.891	1.118	0.832
CCDC80	0.617	1.56909	1.41431	0.83	0.394	1.008	0.464
MYLK3	0.617	1.56909	1.30974	0.748	0.51	0.749	0.35
RBMS3	0.617	1.56909	1.17017	0.823	0.552	0.766	0.391
SCARB2	0.617	1.56909	0.741608	0.875	0.839	0.931	0.625
CDK6	0.616	1.56655	1.00048	0.884	0.778	1.171	0.701
HABP4	0.616	1.56655	1.05737	0.744	0.619	0.694	0.375
AP1S2	0.615	1.56401	0.953416	0.817	0.67	0.773	0.45
IVNS1ABP	0.615	1.56401	0.691213	0.875	0.853	1.134	0.799
ACTR3	0.614	1.56147	0.607863	0.912	0.901	1.129	0.831
GPC3	0.614	1.56147	1.51941	0.679	0.377	0.645	0.259
GPI	0.613	1.55892	0.576204	0.892	0.885	1.028	0.763
SGCB	0.612	1.55638	1.15845	0.69	0.506	0.512	0.252
SLC25A23	0.612	1.55638	0.919817	0.81	0.705	0.782	0.465
C3orf58	0.611	1.55384	1.31642	0.707	0.549	0.763	0.356
ATP1A1	0.61	1.55129	0.637234	0.927	0.885	1.135	0.823
LOC401321	0.609	1.54875	1.12834	0.69	0.557	0.68	0.351
LOC728392	0.609	1.54875	1.39875	0.649	0.443	0.565	0.241
VAMP2	0.609	1.54875	0.788038	0.901	0.845	0.993	0.654
ZNF83	0.609	1.54875	0.807269	0.909	0.81	1.102	0.727
VDAC1	0.607	1.54366	0.442767	0.974	0.98	1.617	1.334
ZMAT3	0.607	1.54366	1.17108	0.728	0.543	0.648	0.324
ALDOA	0.606	1.54112	0.48257	0.972	0.951	1.533	1.236
B3GNT2	0.606	1.54112	1.33516	0.608	0.443	0.518	0.228
PACS1	0.606	1.54112	1.10083	0.744	0.552	0.609	0.316
ALPK3	0.604	1.53603	0.993767	0.81	0.605	0.782	0.445
STK38L	0.604	1.53603	1.42348	0.601	0.387	0.451	0.185
SLC1A3	0.603	1.53349	0.878936	0.767	0.715	0.864	0.532
FNDC3B	0.602	1.53095	0.815561	0.858	0.757	0.922	0.593
S100A6	0.602	1.53095	1.49773	0.547	0.303	0.408	0.158
SYNE1	0.602	1.53095	1.43199	0.612	0.337	0.424	0.172
TNFRSF19	0.602	1.53095	1.44765	0.608	0.363	0.52	0.213
FRAS1	0.601	1.52841	1.22003	0.737	0.507	0.697	0.341
OSBPL9	0.601	1.52841	0.617808	0.909	0.884	1.087	0.793
VWDE	0.601	1.52841	0.982693	0.784	0.696	0.957	0.562
KLF13	0.6	1.52586	1.3656	0.58	0.348	0.403	0.17
LMOD1	0.6	1.52586	1.61419	0.528	0.24	0.402	0.144
ARL6IP5	0.599	1.52332	0.656347	0.94	0.887	1.153	0.829
CYP51A1	0.599	1.52332	0.741243	0.901	0.855	1.138	0.781
DLAT	0.599	1.52332	0.848608	0.784	0.715	0.76	0.47
IDH2	0.598	1.52078	0.648779	0.888	0.849	0.981	0.697
MAGI1	0.598	1.52078	1.33948	0.595	0.363	0.401	0.172
VEGFB	0.598	1.52078	1.01757	0.728	0.596	0.596	0.325
WSB1	0.598	1.52078	0.556856	0.972	0.965	1.634	1.281
WWTR1	0.598	1.52078	1.43623	0.558	0.299	0.342	0.136
KIF26B	0.598	1.52078	1.38338	0.627	0.348	0.488	0.207
NCCRP1	0.597	1.51823	1.57686	0.573	0.247	0.586	0.224
RGS3	0.597	1.51823	1.27846	0.69	0.433	0.541	0.248
C12orf23	0.596	1.51569	1.07148	0.675	0.536	0.552	0.289
PYGB	0.596	1.51569	1.04231	0.685	0.539	0.522	0.277
GSTM4	0.595	1.51315	1.32369	0.573	0.356	0.38	0.164
PHLDB2	0.595	1.51315	1.29755	0.657	0.427	0.545	0.247
PPP3CA	0.595	1.51315	0.874887	0.772	0.665	0.676	0.407
PRNP	0.595	1.51315	1.47037	0.532	0.264	0.301	0.116
TANC1	0.595	1.51315	1.16719	0.705	0.507	0.634	0.317
C20orf166-AS1	0.594	1.5106	1.43838	0.631	0.292	0.504	0.207
EHD3	0.594	1.5106	1.50043	0.502	0.278	0.324	0.123
EXT1	0.594	1.5106	1.10128	0.696	0.501	0.533	0.273
CFLAR	0.593	1.50806	0.898317	0.797	0.691	0.764	0.459
FBLIM1	0.592	1.50552	1.25408	0.644	0.432	0.496	0.229
PPP2R3A	0.592	1.50552	0.832438	0.832	0.709	0.813	0.511
ZCCHC24	0.592	1.50552	0.987008	0.808	0.644	0.765	0.436
TBX18	0.592	1.50552	1.3368	0.748	0.302	1.026	0.496
LMTK2	0.591	1.50297	1.31495	0.573	0.334	0.326	0.14
TPM4	0.591	1.50297	0.429076	0.989	0.997	2.46	2.119
ATP5G1	0.59	1.50043	0.786362	0.819	0.735	0.799	0.515
PPM1K	0.59	1.50043	1.19876	0.653	0.476	0.545	0.263
SCP2	0.59	1.50043	0.893861	0.737	0.641	0.579	0.34
USP53	0.59	1.50043	1.0095	0.722	0.617	0.671	0.372
F2R	0.589	1.49789	1.42218	0.552	0.352	0.435	0.178
TLN2	0.589	1.49789	1.00599	0.778	0.613	0.686	0.382
USMG5	0.589	1.49789	0.509771	0.966	0.944	1.262	0.987
WDR1	0.589	1.49789	0.483983	0.953	0.937	1.362	1.086
CELF2	0.588	1.49534	0.6764	0.918	0.849	1.159	0.825
CHCHD10	0.588	1.49534	0.704278	0.884	0.818	1.027	0.711
KIF1B	0.588	1.49534	0.625213	0.899	0.856	1	0.721
PHC1	0.588	1.49534	0.934101	0.716	0.591	0.544	0.31
UBE2H	0.588	1.49534	0.666034	0.948	0.878	1.1	0.783
DENND5A	0.587	1.4928	0.75876	0.832	0.751	0.755	0.492
MATN2	0.587	1.4928	1.38824	0.58	0.321	0.446	0.187
ANTXR1	0.586	1.49026	1.19874	0.668	0.454	0.507	0.243
STK39	0.586	1.49026	1.14183	0.679	0.476	0.531	0.265
GBE1	0.585	1.48772	1.20889	0.621	0.453	0.483	0.229
JMJD1C	0.585	1.48772	0.850691	0.791	0.69	0.752	0.464
PARVA	0.585	1.48772	0.825804	0.864	0.75	0.866	0.55
QKI	0.585	1.48772	0.416566	0.989	0.972	1.699	1.424
ADAMTS1	0.584	1.48517	1.34849	0.614	0.39	0.638	0.285
KIAA1324L	0.584	1.48517	0.785217	0.8	0.728	0.838	0.543
KIF5B	0.584	1.48517	0.529322	0.968	0.905	1.377	1.075
MYO1C	0.584	1.48517	0.830705	0.804	0.683	0.76	0.475
SELT	0.584	1.48517	0.576229	0.873	0.841	0.918	0.675
DTNA	0.583	1.48263	1.33809	0.578	0.317	0.379	0.162
VASP	0.583	1.48263	1.11904	0.657	0.476	0.482	0.242
CD59	0.582	1.48009	0.611143	0.866	0.828	0.9	0.648
CUX1	0.582	1.48009	0.707051	0.853	0.81	0.936	0.641
KLHDC8B	0.582	1.48009	1.13971	0.616	0.464	0.473	0.234
LOC100506990	0.582	1.48009	0.758849	0.825	0.774	0.832	0.547
MYADM	0.582	1.48009	0.707428	0.843	0.828	0.972	0.668
ZYX	0.582	1.48009	0.603943	0.946	0.937	1.446	1.094
BLCAP	0.581	1.47754	1.22068	0.584	0.37	0.369	0.17
RNF115	0.58	1.475	1.12607	0.61	0.475	0.484	0.242
ERBB4	0.579	1.47246	1.46895	0.511	0.235	0.368	0.144
NFE2L2	0.579	1.47246	0.999278	0.713	0.531	0.548	0.3
SDC3	0.579	1.47246	1.14492	0.623	0.437	0.433	0.212
SSR3	0.579	1.47246	0.465947	0.907	0.923	1.108	0.877
TEAD3	0.579	1.47246	0.792534	0.856	0.742	0.776	0.497
TMEM55A	0.579	1.47246	1.13808	0.644	0.489	0.517	0.258
JAG1	0.578	1.46991	0.938153	0.864	0.612	0.861	0.512
RAB2A	0.578	1.46991	0.567877	0.918	0.883	1.025	0.764
TMEM2	0.578	1.46991	0.80943	0.784	0.705	0.76	0.481
ZNF827	0.578	1.46991	1.14775	0.634	0.448	0.479	0.236
AEBP1	0.576	1.46483	0.89581	0.705	0.571	0.548	0.32
PHLDA1	0.576	1.46483	1.26655	0.623	0.457	0.715	0.341
PTPRM	0.576	1.46483	1.18498	0.565	0.373	0.365	0.172
SSFA2	0.576	1.46483	1.32404	0.545	0.306	0.341	0.146
DIP2B	0.574	1.45974	0.771272	0.741	0.668	0.606	0.385
DUSP14	0.574	1.45974	0.962093	0.69	0.568	0.584	0.329
FAM65A	0.574	1.45974	0.990013	0.759	0.536	0.623	0.347
MTHFD1L	0.574	1.45974	1.05384	0.629	0.471	0.462	0.241
HMGCS1	0.573	1.4572	0.705219	0.907	0.885	1.602	1.169
CST3	0.572	1.45466	0.595781	0.92	0.874	1.094	0.808
RAP1A	0.572	1.45466	0.800352	0.772	0.683	0.694	0.438
RHEB	0.572	1.45466	0.516105	0.946	0.932	1.335	1.046
ATP2B1	0.57	1.44957	0.717122	0.903	0.799	1.082	0.748
FZD6	0.57	1.44957	1.29606	0.506	0.304	0.333	0.145
TEX2	0.57	1.44957	1.34604	0.511	0.267	0.31	0.13
INSR	0.569	1.44703	1.18199	0.543	0.388	0.392	0.186
NCS1	0.569	1.44703	1.17543	0.524	0.36	0.317	0.149
PTPRK	0.569	1.44703	0.944448	0.763	0.582	0.636	0.365
RAB7A	0.569	1.44703	0.519988	0.92	0.881	1.053	0.807
RNF14	0.569	1.44703	1.05641	0.627	0.448	0.416	0.215
TENM3	0.569	1.44703	0.678901	0.875	0.809	0.979	0.684
TJP1	0.569	1.44703	0.690767	0.862	0.782	0.847	0.58
TMCO3	0.569	1.44703	0.967902	0.61	0.482	0.415	0.227
TRIM24	0.568	1.44448	0.705539	0.86	0.791	0.979	0.674
DMPK	0.567	1.44194	1.10209	0.597	0.416	0.409	0.205
NFIC	0.567	1.44194	1.26107	0.53	0.346	0.403	0.182
SUN1	0.567	1.44194	0.98463	0.655	0.487	0.414	0.224
CAPZA2	0.566	1.4394	0.608854	0.899	0.846	0.936	0.677
ITFG1	0.566	1.4394	0.79024	0.735	0.63	0.568	0.355
NPPB	0.566	1.4394	1.97715	0.556	0.363	1.483	0.542
AAK1	0.565	1.43685	0.804312	0.769	0.634	0.607	0.378
DNAJB9	0.565	1.43685	1.00719	0.595	0.439	0.395	0.21
JAK1	0.565	1.43685	1.00863	0.662	0.49	0.493	0.266
PJA2	0.565	1.43685	0.518247	0.948	0.902	1.069	0.821
ENO3	0.564	1.43431	0.958268	0.612	0.499	0.502	0.28
FAM114A1	0.564	1.43431	0.978221	0.677	0.504	0.523	0.289
HIGD1A	0.564	1.43431	0.54975	0.886	0.86	0.964	0.722
KLHL21	0.564	1.43431	1.21189	0.543	0.337	0.365	0.169
MFGE8	0.564	1.43431	0.743018	0.769	0.744	0.743	0.488
WSB2	0.564	1.43431	0.907947	0.675	0.531	0.476	0.273
MSMO1	0.563	1.43177	0.519607	0.933	0.93	1.61	1.282
TMX4	0.563	1.43177	1.13688	0.58	0.45	0.446	0.22
USP46	0.563	1.43177	0.797915	0.705	0.628	0.554	0.344
ARHGAP5	0.562	1.42922	0.570614	0.903	0.856	1.04	0.775
EZR	0.562	1.42922	0.677296	0.95	0.859	1.205	0.861
GYPC	0.562	1.42922	0.881485	0.72	0.582	0.603	0.358
RCAN1	0.562	1.42922	1.39155	0.504	0.321	0.396	0.164
KCNMB4	0.561	1.42668	0.98904	0.636	0.486	0.472	0.257
MLF1	0.561	1.42668	1.01041	0.578	0.464	0.394	0.209
SKIL	0.561	1.42668	1.03461	0.668	0.466	0.511	0.272
TIMM17A	0.561	1.42668	0.753156	0.688	0.603	0.497	0.315
TRAK2	0.561	1.42668	1.09723	0.534	0.387	0.323	0.16
UBE2B	0.561	1.42668	0.669523	0.83	0.768	0.741	0.508
OSBPL8	0.56	1.42414	0.602603	0.847	0.792	0.855	0.616
PTP4A3	0.56	1.42414	1.19476	0.522	0.349	0.333	0.155
RAB8B	0.56	1.42414	0.971761	0.621	0.58	0.546	0.304
SMARCA1	0.56	1.42414	0.501139	0.922	0.894	1.09	0.846
CMPK1	0.559	1.42159	0.796402	0.735	0.626	0.573	0.357
EEA1	0.559	1.42159	0.945682	0.636	0.507	0.495	0.278
ACSL3	0.558	1.41905	0.618573	0.851	0.807	0.924	0.664
AKT1	0.557	1.41651	0.637892	0.841	0.793	0.763	0.534
EFNB2	0.557	1.41651	0.882053	0.784	0.647	0.839	0.514
PURB	0.557	1.41651	0.590996	0.841	0.807	0.837	0.606
RAB31	0.557	1.41651	0.630379	0.92	0.851	1.115	0.81
RPS6KA3	0.557	1.41651	0.843532	0.7	0.599	0.613	0.373
JUND	0.556	1.41397	0.629461	0.89	0.888	1.112	0.808
STARD3NL	0.556	1.41397	0.566566	0.819	0.774	0.707	0.513
DAZAP2	0.555	1.41142	0.957518	0.675	0.476	0.47	0.261
DUSP3	0.555	1.41142	0.863745	0.722	0.573	0.552	0.329
FAM210B	0.555	1.41142	0.845901	0.709	0.599	0.594	0.36
ILK	0.555	1.41142	0.517107	0.909	0.884	1.037	0.795
MGAT5	0.555	1.41142	1.09227	0.556	0.38	0.358	0.179
NOVA1	0.555	1.41142	0.67735	0.81	0.744	0.755	0.516
PGM1	0.555	1.41142	0.576605	0.804	0.789	0.791	0.575
TCEAL8	0.555	1.41142	0.590973	0.851	0.814	0.828	0.599
CD151	0.554	1.40888	0.497756	0.897	0.88	0.968	0.746
CXADR	0.554	1.40888	0.521744	0.886	0.873	1.066	0.817
FNIP2	0.554	1.40888	1.09221	0.571	0.409	0.401	0.202
GPR126	0.554	1.40888	1.23135	0.543	0.318	0.442	0.205
ITGB5	0.554	1.40888	0.927981	0.653	0.522	0.503	0.286
ARMCX3	0.553	1.40634	0.763655	0.812	0.676	0.713	0.461
BTBD1	0.553	1.40634	0.976483	0.578	0.434	0.358	0.193
BTG3	0.553	1.40634	0.831633	0.754	0.602	0.651	0.401
CLN8	0.553	1.40634	1.00103	0.565	0.433	0.39	0.208
DST	0.553	1.40634	0.717544	0.772	0.691	0.766	0.512
GALNT2	0.553	1.40634	0.716539	0.797	0.728	0.699	0.464
MAPK1	0.553	1.40634	0.472897	0.881	0.858	0.863	0.669
CBX6	0.552	1.40379	1.02037	0.586	0.469	0.423	0.224
DVL3	0.551	1.40125	0.577092	0.866	0.816	0.836	0.61
FSCN1	0.551	1.40125	0.485342	0.985	0.978	1.895	1.557
LRP10	0.551	1.40125	0.887872	0.664	0.501	0.472	0.274
EDNRA	0.55	1.39871	0.831821	0.815	0.663	0.917	0.584
LMNA	0.55	1.39871	0.928621	0.636	0.552	0.513	0.292
NFIB	0.55	1.39871	1.13225	0.619	0.408	0.539	0.271
VPS13A	0.55	1.39871	0.777298	0.774	0.642	0.649	0.413
EMP3	0.549	1.39616	0.898121	0.659	0.539	0.528	0.307
FBXL5	0.549	1.39616	0.543035	0.851	0.821	0.806	0.598
RRAS	0.549	1.39616	1.08077	0.55	0.369	0.376	0.19
SEC24D	0.549	1.39616	0.940941	0.595	0.454	0.41	0.228
STT3B	0.549	1.39616	1.10295	0.511	0.43	0.383	0.191
TRIO	0.549	1.39616	1.10915	0.53	0.387	0.375	0.186
ZFHX3	0.549	1.39616	0.875569	0.75	0.563	0.618	0.369
SAMD4B	0.548	1.39362	0.68366	0.769	0.656	0.599	0.401
SETD7	0.548	1.39362	0.785471	0.69	0.601	0.559	0.35
TSC22D2	0.548	1.39362	1.04193	0.588	0.394	0.369	0.191
ARHGAP23	0.547	1.39108	1.08501	0.588	0.362	0.447	0.228
FGD6	0.547	1.39108	1.02708	0.599	0.397	0.398	0.209
GOLGA3	0.547	1.39108	0.740729	0.681	0.595	0.486	0.31
PLEKHA5	0.547	1.39108	0.713365	0.752	0.656	0.612	0.403
PTPN21	0.547	1.39108	0.904304	0.61	0.478	0.406	0.231
UNC5B	0.547	1.39108	0.677464	0.877	0.784	1.016	0.713
IBTK	0.546	1.38853	0.736797	0.713	0.617	0.545	0.351
IGF1R	0.546	1.38853	0.671975	0.862	0.772	0.848	0.587
PDLIM7	0.546	1.38853	0.458896	0.948	0.954	1.437	1.165
WIPF3	0.546	1.38853	0.887982	0.588	0.489	0.438	0.253
AFF4	0.545	1.38599	0.5805	0.812	0.784	0.763	0.552
DNAJB5	0.545	1.38599	1.11707	0.515	0.338	0.327	0.16
GAB1	0.545	1.38599	0.909822	0.616	0.476	0.414	0.235
HOMER1	0.545	1.38599	0.977456	0.504	0.399	0.33	0.177
VIMP	0.545	1.38599	0.827624	0.591	0.5	0.378	0.225
ABCA1	0.544	1.38345	1.06524	0.597	0.413	0.529	0.277
LINC00674	0.543	1.38091	0.640192	0.808	0.728	0.685	0.475
TRAF5	0.543	1.38091	1.01692	0.552	0.405	0.392	0.207
PRSS23	0.542	1.37836	1.14545	0.584	0.447	0.637	0.323
CDK2AP2	0.541	1.37582	0.681753	0.782	0.714	0.769	0.525
HADHB	0.541	1.37582	0.537422	0.834	0.793	0.748	0.554
HDAC5	0.541	1.37582	0.790696	0.644	0.553	0.444	0.273
NDUFA1	0.541	1.37582	0.403212	0.929	0.93	1.047	0.853
SCAF11	0.541	1.37582	0.410031	0.903	0.883	1.025	0.831
SLC38A1	0.541	1.37582	0.468864	0.914	0.904	1.187	0.943
SSH1	0.541	1.37582	0.8557	0.64	0.506	0.444	0.262
CORO1C	0.54	1.37328	0.633818	0.767	0.696	0.615	0.425
ADAMTS9	0.54	1.37328	1.00943	0.593	0.39	0.429	0.229
PDLIM1	0.539	1.37073	0.660848	0.903	0.814	1.158	0.831
RNF8	0.539	1.37073	0.860514	0.588	0.465	0.371	0.216
TMEM127	0.539	1.37073	0.84454	0.619	0.508	0.406	0.24
TMX3	0.539	1.37073	0.837268	0.593	0.501	0.409	0.243
ZFYVE16	0.539	1.37073	0.609707	0.735	0.67	0.577	0.403
ZNF644	0.539	1.37073	0.591452	0.772	0.729	0.718	0.514
GALC	0.538	1.36819	0.709783	0.744	0.647	0.598	0.394
WIPI1	0.538	1.36819	1.03796	0.506	0.332	0.315	0.162
PPIB	0.537	1.36565	0.556883	0.862	0.793	0.836	0.617
ROCK2	0.537	1.36565	0.718607	0.7	0.615	0.581	0.38
STRN	0.537	1.36565	0.56858	0.78	0.744	0.674	0.487
CD164	0.536	1.3631	0.40218	0.927	0.925	1.043	0.85
CPNE3	0.536	1.3631	0.553607	0.797	0.758	0.711	0.52
NAB1	0.535	1.36056	0.970896	0.552	0.405	0.369	0.2
TIPARP	0.535	1.36056	0.733261	0.731	0.633	0.697	0.458
CEP170	0.534	1.35802	0.49911	0.866	0.83	0.854	0.652
KDM6A	0.534	1.35802	0.59385	0.787	0.733	0.762	0.547
SSH2	0.534	1.35802	1.05714	0.506	0.324	0.285	0.144
ACBD3	0.533	1.35547	0.774068	0.683	0.542	0.473	0.295
ARL1	0.533	1.35547	0.589202	0.784	0.705	0.605	0.429
B2M	0.533	1.35547	0.528495	0.871	0.852	0.934	0.706
CLINT1	0.533	1.35547	0.57094	0.847	0.763	0.732	0.531
APPBP2	0.532	1.35293	0.719645	0.778	0.627	0.567	0.37
ATF4	0.532	1.35293	0.407301	0.938	0.926	1.178	0.965
EFR3A	0.532	1.35293	0.791143	0.603	0.513	0.421	0.258
KIF1C	0.532	1.35293	0.767082	0.634	0.51	0.418	0.26
SACS	0.532	1.35293	0.780743	0.651	0.595	0.596	0.376
CASP3	0.531	1.35039	0.851673	0.556	0.468	0.369	0.216
FYTTD1	0.531	1.35039	0.572463	0.78	0.691	0.594	0.425
HEBP1	0.531	1.35039	0.88793	0.582	0.432	0.364	0.208
MTFR1L	0.531	1.35039	0.800978	0.621	0.508	0.397	0.241
PLCB1	0.531	1.35039	0.957555	0.511	0.406	0.366	0.2
PTPN11	0.531	1.35039	0.448781	0.871	0.849	0.857	0.673
RND3	0.531	1.35039	0.995892	0.554	0.447	0.557	0.306
SAR1B	0.531	1.35039	0.720696	0.698	0.57	0.492	0.318
TSEN34	0.531	1.35039	0.672945	0.782	0.669	0.637	0.431
XIST	0.531	1.35039	0.671656	0.752	0.675	0.881	0.612
CDKN1C	0.53	1.34784	0.746678	0.841	0.723	0.951	0.638
EFNA5	0.53	1.34784	0.73699	0.769	0.696	0.799	0.53
IRF2BP2	0.53	1.34784	0.60565	0.776	0.747	0.717	0.509
OBSL1	0.53	1.34784	0.608692	0.817	0.753	0.734	0.521
RNF103	0.53	1.34784	0.844898	0.573	0.466	0.382	0.225
STXBP1	0.53	1.34784	0.891702	0.586	0.476	0.452	0.261
ARHGAP32	0.529	1.3453	0.737728	0.642	0.582	0.538	0.346
RAB21	0.529	1.3453	0.775541	0.634	0.528	0.414	0.256
PPP1R18	0.528	1.34276	0.675917	0.731	0.624	0.574	0.385
UBE2J1	0.528	1.34276	0.573261	0.705	0.703	0.585	0.418
ZDHHC2	0.528	1.34276	0.81818	0.586	0.496	0.398	0.239
CDC42EP1	0.527	1.34022	0.885798	0.623	0.478	0.529	0.31
KIDINS220	0.527	1.34022	0.460152	0.86	0.848	0.885	0.692
PNKD	0.527	1.34022	0.647086	0.664	0.616	0.502	0.34
BCAR1	0.526	1.33767	0.842315	0.595	0.487	0.423	0.251
CAPN2	0.526	1.33767	0.431727	0.912	0.891	1.142	0.922
MDFIC	0.526	1.33767	0.867721	0.565	0.432	0.348	0.201
OCLN	0.526	1.33767	0.821589	0.597	0.497	0.446	0.269
RABGAP1	0.526	1.33767	0.642445	0.767	0.669	0.618	0.425
SIN3B	0.526	1.33767	0.696158	0.675	0.571	0.456	0.298
SQLE	0.526	1.33767	0.592506	0.836	0.751	0.913	0.665
ZC2HC1A	0.526	1.33767	0.688124	0.709	0.619	0.554	0.368
APP	0.525	1.33513	0.489506	0.946	0.923	1.235	0.974
ATP6V0B	0.525	1.33513	0.458027	0.866	0.839	0.837	0.653
ERC1	0.525	1.33513	0.689176	0.728	0.617	0.56	0.372
PPP1R21	0.525	1.33513	0.933846	0.506	0.383	0.316	0.174
SCOC	0.525	1.33513	0.512524	0.821	0.771	0.743	0.558
C6orf62	0.524	1.33259	0.484539	0.806	0.795	0.738	0.563
CLTB	0.524	1.33259	0.671094	0.739	0.616	0.519	0.347
DYNLT3	0.524	1.33259	0.903081	0.519	0.367	0.31	0.174
PIP5K1C	0.524	1.33259	0.554534	0.748	0.725	0.661	0.481
RAB12	0.524	1.33259	0.525214	0.897	0.902	1.226	0.949
SMARCD3	0.524	1.33259	0.729359	0.696	0.55	0.515	0.332
AKT3	0.523	1.33004	0.799324	0.653	0.504	0.454	0.278
COL6A1	0.523	1.33004	0.403147	0.976	0.979	1.843	1.564
S100A10	0.523	1.33004	0.56	0.946	0.892	1.87	1.486
AK1	0.522	1.3275	0.71045	0.61	0.528	0.401	0.258
CISD1	0.522	1.3275	0.601165	0.718	0.651	0.558	0.391
HSDL2	0.522	1.3275	0.614495	0.696	0.656	0.584	0.407
RNF19A	0.522	1.3275	0.758485	0.627	0.528	0.431	0.27
VPS37A	0.522	1.3275	0.702607	0.623	0.543	0.405	0.262
ZNF91	0.521	1.32496	0.559989	0.724	0.677	0.574	0.413
ANKRD12	0.52	1.32241	0.552182	0.795	0.729	0.722	0.529
FAM177A1	0.52	1.32241	0.652188	0.653	0.612	0.481	0.324
LRCH2	0.52	1.32241	0.830398	0.582	0.437	0.393	0.234
SHOC2	0.52	1.32241	0.725339	0.625	0.547	0.424	0.271
SRF	0.52	1.32241	0.604272	0.756	0.719	0.698	0.495
WWC3	0.52	1.32241	0.637947	0.726	0.655	0.585	0.402
HIVEP1	0.519	1.31987	0.807425	0.554	0.497	0.45	0.274
LCOR	0.519	1.31987	0.712826	0.677	0.554	0.462	0.299
NDUFAF4	0.519	1.31987	0.797106	0.606	0.473	0.382	0.232
TOM1L2	0.519	1.31987	0.92309	0.509	0.344	0.307	0.17
CMTM3	0.518	1.31733	0.610599	0.735	0.661	0.58	0.405
COL1A2	0.518	1.31733	0.408569	0.985	0.98	2.137	1.832
EDEM3	0.518	1.31733	0.69183	0.731	0.582	0.511	0.337
GOLGA2	0.518	1.31733	0.727348	0.647	0.518	0.426	0.272
NAA20	0.518	1.31733	0.600806	0.791	0.68	0.613	0.432
SMAD2	0.518	1.31733	0.420087	0.86	0.834	0.787	0.625
BIRC6	0.517	1.31478	0.470934	0.806	0.771	0.719	0.552
EMC10	0.517	1.31478	0.467734	0.832	0.809	0.762	0.588
HES1	0.517	1.31478	0.944778	0.582	0.473	0.726	0.422
KIAA0232	0.517	1.31478	0.624326	0.746	0.649	0.59	0.409
MTRF1L	0.517	1.31478	0.704156	0.664	0.546	0.464	0.302
RSU1	0.517	1.31478	0.422952	0.832	0.831	0.855	0.681
SIRT2	0.517	1.31478	0.854465	0.584	0.451	0.402	0.236
GLRX	0.516	1.31224	0.636739	0.784	0.708	0.839	0.592
NDUFB3	0.516	1.31224	0.504944	0.821	0.77	0.691	0.519
LRRN4	0.516	1.31224	0.971502	0.526	0.317	0.39	0.212
COX17	0.515	1.3097	0.477099	0.832	0.788	0.772	0.593
MAN2A1	0.515	1.3097	0.655144	0.614	0.546	0.445	0.298
MARVELD1	0.515	1.3097	0.772851	0.567	0.439	0.336	0.206
PRKACB	0.515	1.3097	0.502664	0.741	0.718	0.59	0.44
RBMS1	0.515	1.3097	0.436476	0.877	0.858	0.873	0.691
SLC39A10	0.515	1.3097	0.494708	0.795	0.779	0.757	0.575
TRIM44	0.515	1.3097	0.493585	0.789	0.737	0.625	0.47
XIAP	0.515	1.3097	0.562812	0.746	0.665	0.567	0.407
DAP	0.514	1.30716	0.477185	0.765	0.728	0.618	0.469
MAN1A2	0.514	1.30716	0.703465	0.58	0.504	0.386	0.249
FAM200B	0.513	1.30461	0.634602	0.754	0.663	0.637	0.441
SMAD9	0.513	1.30461	0.907279	0.506	0.365	0.338	0.19
CLCN6	0.512	1.30207	0.722556	0.595	0.493	0.392	0.25
PRAF2	0.512	1.30207	0.579727	0.787	0.705	0.669	0.48
TMBIM1	0.512	1.30207	0.873496	0.509	0.37	0.306	0.175
ANXA3	0.511	1.29953	0.748381	0.718	0.513	0.762	0.5
DNAJB14	0.511	1.29953	0.815358	0.528	0.394	0.308	0.183
KCTD20	0.511	1.29953	0.73586	0.627	0.531	0.455	0.29
TMED5	0.511	1.29953	0.666406	0.659	0.55	0.458	0.305
ASAP2	0.51	1.29698	0.817543	0.53	0.412	0.347	0.207
BDP1	0.51	1.29698	0.553721	0.713	0.645	0.568	0.41
BOK	0.51	1.29698	0.851726	0.509	0.365	0.32	0.186
LAMB1	0.51	1.29698	0.420107	0.884	0.895	1.304	1.069
LOC729732	0.51	1.29698	0.737027	0.582	0.485	0.412	0.261
NFAT5	0.51	1.29698	0.529063	0.769	0.712	0.626	0.461
ORAI2	0.51	1.29698	0.7203	0.586	0.489	0.378	0.241
PROS1	0.51	1.29698	0.838982	0.537	0.388	0.324	0.19
SELK	0.51	1.29698	0.706741	0.58	0.485	0.357	0.229
SLC39A14	0.51	1.29698	0.693411	0.629	0.517	0.448	0.293
ARHGEF12	0.509	1.29444	0.659472	0.651	0.553	0.449	0.3
GBAS	0.509	1.29444	0.440854	0.845	0.841	0.803	0.631
MAFG	0.509	1.29444	0.669201	0.638	0.55	0.483	0.322
NIPSNAP3A	0.509	1.29444	0.741048	0.612	0.49	0.413	0.261
RAB22A	0.509	1.29444	0.804068	0.573	0.405	0.333	0.2
UACA	0.509	1.29444	0.643216	0.683	0.633	0.621	0.427
EMILIN2	0.508	1.2919	0.538533	0.67	0.669	0.659	0.484
EPN2	0.508	1.2919	0.726783	0.554	0.476	0.381	0.242
SOD3	0.508	1.2919	0.780528	0.591	0.478	0.452	0.28
ZDBF2	0.508	1.2919	0.775781	0.573	0.439	0.36	0.221
ASH1L	0.507	1.28935	0.589962	0.72	0.619	0.545	0.384
DNAJC13	0.507	1.28935	0.519832	0.681	0.662	0.522	0.383
FBN2	0.507	1.28935	0.4137	0.912	0.887	1.324	1.09
GOLGA8B	0.507	1.28935	0.633057	0.647	0.591	0.509	0.348
MARK1	0.507	1.28935	0.820553	0.522	0.374	0.309	0.183
TACC2	0.507	1.28935	0.768001	0.519	0.408	0.31	0.19
TMED7	0.507	1.28935	0.508012	0.756	0.705	0.57	0.423
AASS	0.506	1.28681	0.407528	0.791	0.792	0.796	0.637
DPH3	0.506	1.28681	0.533709	0.679	0.62	0.459	0.332
FAM162A	0.506	1.28681	0.569885	0.683	0.64	0.516	0.367
RAP2A	0.506	1.28681	0.571155	0.7	0.666	0.579	0.414
VAMP3	0.506	1.28681	0.482492	0.789	0.753	0.655	0.497
AFF1	0.505	1.28427	0.558093	0.703	0.644	0.543	0.39
C5orf30	0.505	1.28427	0.826658	0.502	0.401	0.328	0.194
LRP12	0.505	1.28427	0.719652	0.545	0.415	0.316	0.2
PHC3	0.505	1.28427	0.730084	0.541	0.43	0.315	0.198
ACOT13	0.504	1.28172	0.499391	0.731	0.709	0.608	0.455
NDUFS1	0.504	1.28172	0.453503	0.744	0.74	0.616	0.474
TRABD2B	0.504	1.28172	0.754667	0.631	0.483	0.49	0.31
ZMYND11	0.504	1.28172	0.472735	0.81	0.778	0.716	0.549
ACAP2	0.503	1.27918	0.592905	0.629	0.568	0.437	0.304
C3orf37	0.503	1.27918	0.604662	0.565	0.575	0.429	0.296
MRPL15	0.503	1.27918	0.428016	0.804	0.784	0.712	0.56
MRPL34	0.503	1.27918	0.436239	0.746	0.721	0.594	0.461
PHF17	0.503	1.27918	0.553939	0.675	0.661	0.653	0.475
TWF1	0.503	1.27918	0.704355	0.591	0.473	0.352	0.226
CASC4	0.502	1.27664	0.558389	0.739	0.666	0.555	0.399
EPT1	0.501	1.27409	0.570525	0.642	0.615	0.488	0.346
GPC4	0.501	1.27409	0.788921	0.502	0.464	0.391	0.239
MAX	0.501	1.27409	0.639966	0.612	0.513	0.407	0.274
TAB2	0.501	1.27409	0.47855	0.769	0.705	0.587	0.444
GAPVD1	0.5	1.27155	0.605503	0.612	0.534	0.4	0.275
RIOK3	0.5	1.27155	0.601673	0.634	0.568	0.431	0.298
CREB3L1	0.499	1.26901	0.681962	0.664	0.58	0.643	0.433
INSIG1	0.499	1.26901	0.639143	0.634	0.557	0.551	0.377
PTGFRN	0.499	1.26901	0.751213	0.522	0.408	0.299	0.185
RIT1	0.499	1.26901	0.758354	0.513	0.42	0.333	0.206
RRP15	0.499	1.26901	0.501107	0.681	0.648	0.484	0.358
SNX14	0.499	1.26901	0.684076	0.524	0.461	0.318	0.206
TNRC18	0.499	1.26901	0.77244	0.509	0.416	0.314	0.192
AXL	0.498	1.26647	0.409016	0.888	0.869	1.021	0.828
BMP1	0.498	1.26647	0.807896	0.509	0.381	0.329	0.197
C2orf29	0.498	1.26647	0.522479	0.578	0.582	0.395	0.286
FAM120A	0.498	1.26647	0.423215	0.828	0.782	0.721	0.569
DICER1	0.497	1.26392	0.430239	0.817	0.767	0.76	0.599
PAK2	0.497	1.26392	0.459525	0.668	0.662	0.471	0.357
SNX9	0.497	1.26392	0.575169	0.664	0.573	0.465	0.328
STAT3	0.497	1.26392	0.706656	0.552	0.432	0.324	0.207
TERF2IP	0.497	1.26392	0.464726	0.86	0.786	0.773	0.598
WASF3	0.497	1.26392	0.596712	0.642	0.56	0.46	0.32
ZYG11B	0.497	1.26392	0.522557	0.722	0.651	0.515	0.377
CCSER2	0.496	1.26138	0.519476	0.731	0.658	0.566	0.417
CMTM4	0.496	1.26138	0.744822	0.513	0.387	0.304	0.189
COTL1	0.496	1.26138	0.580197	0.612	0.64	0.562	0.399
FYN	0.496	1.26138	0.458131	0.767	0.732	0.635	0.488
MYO5A	0.496	1.26138	0.68042	0.545	0.447	0.338	0.22
PLXNA1	0.496	1.26138	0.589538	0.647	0.554	0.432	0.301
ESYT2	0.495	1.25884	0.580614	0.636	0.556	0.416	0.291
ROR1	0.495	1.25884	0.512854	0.744	0.654	0.642	0.478
SIKE1	0.495	1.25884	0.48511	0.657	0.637	0.464	0.346
TMEM41B	0.495	1.25884	0.488498	0.657	0.628	0.452	0.336
ARHGAP21	0.494	1.25629	0.497513	0.759	0.689	0.601	0.45
DYRK4	0.494	1.25629	0.755921	0.522	0.38	0.317	0.196
PTEN	0.494	1.25629	0.52641	0.677	0.635	0.524	0.383
SECISBP2L	0.494	1.25629	0.603763	0.593	0.514	0.394	0.271
AK3	0.493	1.25375	0.404425	0.873	0.824	0.784	0.628
CD46	0.493	1.25375	0.595256	0.619	0.549	0.41	0.284
CYB5A	0.493	1.25375	0.665007	0.541	0.441	0.326	0.214
FUBP3	0.493	1.25375	0.418742	0.735	0.701	0.555	0.434
PKD1	0.493	1.25375	0.683096	0.502	0.408	0.282	0.182
SLC25A32	0.493	1.25375	0.757199	0.504	0.392	0.297	0.183
TMEM181	0.493	1.25375	0.544856	0.681	0.577	0.438	0.314
BAG1	0.492	1.25121	0.523877	0.599	0.568	0.398	0.288
EPB41L3	0.492	1.25121	0.432107	0.851	0.806	0.84	0.665
LOC401397	0.492	1.25121	0.457592	0.629	0.641	0.473	0.359
MAP4K5	0.492	1.25121	0.486553	0.711	0.68	0.535	0.401
RNH1	0.492	1.25121	0.577945	0.644	0.543	0.392	0.274
MYO9B	0.491	1.24866	0.631092	0.522	0.448	0.312	0.209
TXNDC17	0.491	1.24866	0.415512	0.825	0.803	0.742	0.589
CBL	0.49	1.24612	0.523169	0.629	0.58	0.435	0.316
MGAT4B	0.49	1.24612	0.567147	0.638	0.56	0.414	0.292
OSTM1	0.49	1.24612	0.694325	0.519	0.401	0.284	0.182
SLAIN2	0.49	1.24612	0.486545	0.69	0.642	0.503	0.376
SPTSSA	0.49	1.24612	0.445188	0.761	0.735	0.623	0.482
SREBF2	0.49	1.24612	0.646927	0.565	0.522	0.393	0.263
DACT3	0.489	1.24358	0.543812	0.644	0.589	0.491	0.354
EIF2AK2	0.489	1.24358	0.642773	0.556	0.44	0.336	0.224
HERC1	0.489	1.24358	0.553556	0.56	0.524	0.374	0.265
OPTN	0.489	1.24358	0.687346	0.528	0.409	0.335	0.217
SLK	0.489	1.24358	0.57079	0.586	0.536	0.419	0.295
TSIX	0.489	1.24358	0.50218	0.692	0.641	0.536	0.398
ASPH	0.488	1.24103	0.418369	0.716	0.729	0.599	0.47
MTX2	0.488	1.24103	0.454419	0.655	0.626	0.448	0.34
NDUFA8	0.488	1.24103	0.440566	0.64	0.638	0.438	0.335
PIAS2	0.488	1.24103	0.608833	0.539	0.475	0.346	0.236
PLEKHO1	0.488	1.24103	0.485498	0.666	0.645	0.486	0.363
RALGAPA1	0.488	1.24103	0.484318	0.651	0.589	0.447	0.333
INF2	0.487	1.23849	0.596617	0.53	0.468	0.342	0.235
RNASET2	0.487	1.23849	0.738532	0.502	0.432	0.332	0.208
SEMA5A	0.487	1.23849	0.598077	0.662	0.582	0.652	0.462
ZNF330	0.487	1.23849	0.519744	0.575	0.534	0.361	0.261
EVI5	0.486	1.23595	0.600474	0.534	0.459	0.34	0.233
FAM63B	0.486	1.23595	0.571268	0.595	0.518	0.4	0.281
GYS1	0.486	1.23595	0.530897	0.619	0.557	0.441	0.319
HERC2	0.486	1.23595	0.560417	0.606	0.525	0.366	0.258
MAPK9	0.486	1.23595	0.536055	0.629	0.578	0.453	0.327
NSDHL	0.486	1.23595	0.461706	0.67	0.631	0.497	0.377
RAP2C	0.486	1.23595	0.673938	0.519	0.418	0.316	0.206
SPOP	0.486	1.23595	0.488295	0.666	0.616	0.461	0.343
MARK4	0.485	1.23341	0.435084	0.756	0.691	0.559	0.433
MPPED2	0.485	1.23341	0.702004	0.522	0.415	0.35	0.225
PPP1R15A	0.485	1.23341	0.604558	0.547	0.494	0.39	0.268
STX12	0.485	1.23341	0.599317	0.552	0.473	0.351	0.241
VPS13C	0.485	1.23341	0.520332	0.636	0.584	0.458	0.334
SEMA3C	0.485	1.23341	0.741078	0.524	0.402	0.44	0.279
ANKRD52	0.484	1.23086	0.603798	0.571	0.489	0.359	0.246
ARMCX1	0.484	1.23086	0.572448	0.534	0.461	0.33	0.23
GUK1	0.484	1.23086	0.43232	0.722	0.67	0.481	0.371
MALT1	0.484	1.23086	0.422232	0.75	0.709	0.654	0.514
MAP9	0.484	1.23086	0.498176	0.616	0.553	0.422	0.311
MESDC1	0.484	1.23086	0.628828	0.506	0.439	0.313	0.21
DDX47	0.483	1.22832	0.442978	0.668	0.651	0.479	0.367
FBXO18	0.483	1.22832	0.459185	0.694	0.641	0.495	0.376
IAH1	0.483	1.22832	0.577138	0.528	0.455	0.324	0.225
UBE2W	0.483	1.22832	0.502115	0.629	0.588	0.423	0.311
DCAF6	0.482	1.22578	0.585233	0.539	0.458	0.341	0.236
IER2	0.482	1.22578	0.610149	0.562	0.543	0.454	0.313
IRF2BPL	0.482	1.22578	0.529928	0.642	0.574	0.454	0.329
OLFML3	0.482	1.22578	0.455518	0.741	0.744	0.757	0.588
PAWR	0.482	1.22578	0.592887	0.584	0.479	0.358	0.247
RAP1GDS1	0.482	1.22578	0.453818	0.662	0.633	0.458	0.348
SRSF8	0.482	1.22578	0.569888	0.571	0.503	0.364	0.255
GATA4	0.482	1.22578	0.441198	0.985	0.934	1.746	1.451
ATP11B	0.481	1.22323	0.555634	0.56	0.506	0.354	0.25
DCHS1	0.481	1.22323	0.574711	0.532	0.458	0.304	0.211
EFEMP2	0.481	1.22323	0.532062	0.634	0.557	0.408	0.294
GBA2	0.481	1.22323	0.475769	0.614	0.577	0.406	0.303
HMBOX1	0.481	1.22323	0.586075	0.573	0.471	0.33	0.228
KRT10	0.481	1.22323	0.543455	0.567	0.504	0.35	0.249
LTN1	0.481	1.22323	0.521806	0.644	0.566	0.432	0.314
NAPG	0.481	1.22323	0.550618	0.593	0.497	0.357	0.253
BICD2	0.48	1.22069	0.530811	0.616	0.531	0.397	0.286
LOC92249	0.48	1.22069	0.522627	0.509	0.48	0.324	0.233
NEK7	0.48	1.22069	0.50227	0.677	0.613	0.496	0.367
RBM38	0.48	1.22069	0.602227	0.537	0.538	0.456	0.316
UBE3C	0.48	1.22069	0.565656	0.528	0.459	0.312	0.218
ZFX	0.48	1.22069	0.564979	0.537	0.493	0.334	0.234
ARL8A	0.479	1.21815	0.558931	0.543	0.479	0.341	0.24
KIAA1671	0.479	1.21815	0.571048	0.519	0.454	0.32	0.223
MMD	0.479	1.21815	0.492849	0.67	0.613	0.519	0.387
RASL10B	0.479	1.21815	0.532201	0.569	0.541	0.444	0.321
UBE2G2	0.479	1.21815	0.42879	0.677	0.634	0.48	0.371
ASCC3	0.478	1.2156	0.436982	0.722	0.67	0.572	0.443
DGKD	0.478	1.2156	0.617125	0.511	0.426	0.305	0.206
LATS2	0.478	1.2156	0.521498	0.647	0.57	0.457	0.333
LRRC8A	0.478	1.2156	0.418829	0.677	0.676	0.523	0.408
PNPLA8	0.478	1.2156	0.450908	0.64	0.595	0.428	0.325
SLC31A1	0.478	1.2156	0.501695	0.616	0.549	0.394	0.289
TAGLN2	0.478	1.2156	0.613225	0.558	0.531	0.488	0.337
ABI1	0.477	1.21306	0.487143	0.606	0.549	0.384	0.284
FBXW11	0.477	1.21306	0.429707	0.664	0.623	0.459	0.354
IGF2R	0.477	1.21306	0.440685	0.672	0.613	0.462	0.354
MDM2	0.477	1.21306	0.515482	0.573	0.55	0.392	0.285
PLOD3	0.477	1.21306	0.506413	0.571	0.532	0.37	0.27
RABGGTB	0.477	1.21306	0.442584	0.726	0.67	0.539	0.415
TXNDC15	0.477	1.21306	0.487892	0.664	0.561	0.422	0.313
ACSS2	0.476	1.21052	0.53481	0.573	0.507	0.363	0.26
COMT	0.476	1.21052	0.455476	0.614	0.58	0.433	0.328
LPIN1	0.476	1.21052	0.427635	0.694	0.673	0.634	0.496
MYO1B	0.476	1.21052	0.410964	0.666	0.651	0.512	0.401
PKN2	0.476	1.21052	0.509559	0.537	0.489	0.312	0.226
RC3H1	0.476	1.21052	0.48537	0.541	0.515	0.339	0.25
SCYL2	0.476	1.21052	0.538807	0.565	0.5	0.349	0.249
SMYD2	0.476	1.21052	0.466517	0.597	0.557	0.396	0.297
TES	0.476	1.21052	0.463173	0.638	0.588	0.458	0.346
TULP4	0.476	1.21052	0.557163	0.556	0.492	0.342	0.241
ZNF275	0.476	1.21052	0.591088	0.562	0.457	0.359	0.248
ANKRD50	0.475	1.20797	0.408301	0.726	0.707	0.632	0.5
IFNAR1	0.475	1.20797	0.534419	0.562	0.49	0.344	0.246
MRPS36	0.475	1.20797	0.486174	0.595	0.559	0.389	0.288
UXS1	0.475	1.20797	0.500564	0.578	0.525	0.37	0.271
CRTC3	0.474	1.20543	0.614247	0.511	0.394	0.293	0.198
DEGS1	0.474	1.20543	0.42131	0.741	0.705	0.6	0.47
FLRT2	0.474	1.20543	0.438189	0.817	0.739	0.9	0.713
MRS2	0.474	1.20543	0.536047	0.506	0.458	0.294	0.209
OXR1	0.474	1.20543	0.458336	0.61	0.559	0.412	0.311
VWA8	0.474	1.20543	0.53481	0.547	0.499	0.363	0.26
ARFGAP3	0.473	1.20289	0.462713	0.506	0.479	0.286	0.213
CES2	0.473	1.20289	0.478974	0.591	0.549	0.399	0.297
UFM1	0.473	1.20289	0.441012	0.696	0.628	0.491	0.377
WWC2	0.472	1.20034	0.564851	0.53	0.444	0.316	0.221
XBP1	0.472	1.20034	0.473036	0.603	0.559	0.435	0.326
ANKRD10	0.471	1.1978	0.480062	0.562	0.535	0.368	0.273
FNDC3A	0.471	1.1978	0.425474	0.711	0.649	0.494	0.383
OTUD4	0.471	1.1978	0.448787	0.601	0.541	0.37	0.28
RHBDF1	0.471	1.1978	0.47519	0.623	0.578	0.442	0.331
B4GALT1	0.47	1.19526	0.407775	0.616	0.615	0.427	0.333
CD47	0.47	1.19526	0.508519	0.552	0.547	0.422	0.309
LRIF1	0.47	1.19526	0.542404	0.515	0.44	0.328	0.233
MBNL2	0.47	1.19526	0.507061	0.644	0.553	0.487	0.359
PLEKHA1	0.47	1.19526	0.490547	0.534	0.504	0.348	0.256
CREB3L2	0.469	1.19272	0.414607	0.662	0.617	0.476	0.371
MMP15	0.469	1.19272	0.443871	0.601	0.581	0.43	0.328
NAA25	0.469	1.19272	0.415875	0.683	0.605	0.454	0.353
BACH1	0.468	1.19017	0.44791	0.61	0.55	0.389	0.295
SEMA3A	0.468	1.19017	0.530281	0.653	0.571	0.647	0.477
SEPT8	0.468	1.19017	0.412773	0.651	0.62	0.437	0.34
SPAG9	0.468	1.19017	0.441848	0.634	0.568	0.413	0.315
ZHX1	0.468	1.19017	0.4719	0.616	0.532	0.396	0.296
IDE	0.467	1.18763	0.428647	0.606	0.556	0.387	0.297
TMCC1	0.467	1.18763	0.458856	0.534	0.496	0.314	0.235
HERPUD1	0.466	1.18509	0.514369	0.526	0.459	0.321	0.232
RNF219	0.466	1.18509	0.467202	0.578	0.546	0.391	0.293
UGGT2	0.466	1.18509	0.476779	0.524	0.469	0.307	0.227
LRRFIP2	0.465	1.18254	0.427147	0.593	0.549	0.374	0.287
MYSM1	0.465	1.18254	0.403086	0.612	0.574	0.391	0.305
PURA	0.465	1.18254	0.515466	0.528	0.485	0.34	0.246
CDC14B	0.464	1.18	0.421077	0.603	0.57	0.389	0.3
GM2A	0.464	1.18	0.430706	0.524	0.517	0.329	0.251
HERC4	0.464	1.18	0.458463	0.537	0.501	0.336	0.252
ZNF320	0.464	1.18	0.422547	0.599	0.557	0.378	0.291
AKAP11	0.463	1.17746	0.448974	0.534	0.499	0.325	0.245
PRKAA2	0.463	1.17746	0.449779	0.562	0.52	0.392	0.297
BAD	0.462	1.17491	0.41748	0.537	0.49	0.306	0.235
HECTD2	0.462	1.17491	0.47973	0.541	0.478	0.326	0.241
ANTXR2	0.461	1.17237	0.413314	0.677	0.592	0.462	0.36
ARFGEF2	0.461	1.17237	0.41793	0.606	0.547	0.387	0.299
ATP6V0A1	0.461	1.17237	0.430957	0.545	0.535	0.352	0.269
SDHD	0.46	1.16983	0.433972	0.584	0.507	0.345	0.263
NDFIP2	0.459	1.16728	0.450424	0.541	0.496	0.324	0.244
PVRL3	0.457	1.1622	0.415659	0.515	0.487	0.312	0.24
RILPL1	0.457	1.1622	0.424932	0.547	0.492	0.338	0.259
SUCLA2	0.457	1.1622	0.412805	0.56	0.514	0.338	0.261
APC	0.456	1.15966	0.405122	0.55	0.525	0.369	0.287
EHD1	0.455	1.15711	0.456687	0.502	0.446	0.281	0.21
FURIN	0.452	1.14948	0.406222	0.554	0.475	0.319	0.247
PDPK1	0.452	1.14948	0.437048	0.519	0.454	0.284	0.215
KIAA1033	0.449	1.14185	0.401319	0.504	0.447	0.284	0.22
STAM2	0.449	1.14185	0.417946	0.524	0.468	0.301	0.231

## Sheet: GO terms seg3 > seg1
GO term analysis of DE genes: myocardial segment 3 > common progenitor segment 1
Analysis Type:	PANTHER Overrepresentation Test (Released 20210224)
Annotation Version and Release Date:	GO Ontology database DOI: 10.5281/zenodo.4495804 Released 2021-02-01
Analyzed List:	upload_1 (Homo sapiens)
Reference List:	Homo sapiens (all genes in database)
Test Type:	FISHER
Correction:	FDR
GO biological process complete	Homo sapiens - REFLIST (20595)	upload_1 (1007)	upload_1 (expected)	upload_1 (over/under)	upload_1 (fold Enrichment)	upload_1 (raw P-value)	upload_1 (FDR)
actin filament-based process (GO:0030029)	598	117	29.24	+	4	1.83e-33	2.88e-29
cellular component organization (GO:0016043)	5775	465	282.37	+	1.65	1.22e-32	9.6e-29
muscle structure development (GO:0061061)	460	100	22.49	+	4.45	7.92e-32	4.16e-28
anatomical structure development (GO:0048856)	5266	432	257.48	+	1.68	3.65e-31	1.15e-27
cellular process (GO:0009987)	15487	906	757.24	+	1.2	2.98e-31	1.18e-27
system development (GO:0048731)	4279	372	209.22	+	1.78	2.9e-30	7.63e-27
cellular component organization or biogenesis (GO:0071840)	5999	468	293.32	+	1.6	1.35e-29	3.05e-26
developmental process (GO:0032502)	5729	452	280.12	+	1.61	2.84e-29	5.59e-26
circulatory system development (GO:0072359)	853	133	41.71	+	3.19	3.28e-29	5.74e-26
multicellular organism development (GO:0007275)	4877	403	238.46	+	1.69	5.2e-29	8.2e-26
heart development (GO:0007507)	508	99	24.84	+	3.99	3.07e-28	4.4e-25
muscle cell differentiation (GO:0042692)	235	68	11.49	+	5.92	6.37e-28	8.37e-25
actin cytoskeleton organization (GO:0030036)	524	98	25.62	+	3.82	9.29e-27	1.13e-23
anatomical structure morphogenesis (GO:0009653)	2135	225	104.39	+	2.16	1.21e-26	1.36e-23
negative regulation of cellular process (GO:0048523)	4909	397	240.03	+	1.65	1.65e-26	1.73e-23
striated muscle cell differentiation (GO:0051146)	190	60	9.29	+	6.46	2.06e-26	2.03e-23
regulation of signaling (GO:0023051)	3459	308	169.13	+	1.82	1.1e-25	1.02e-22
regulation of cellular component organization (GO:0051128)	2360	236	115.39	+	2.05	3.71e-25	3.26e-22
positive regulation of cellular process (GO:0048522)	5656	434	276.55	+	1.57	3.95e-25	3.28e-22
positive regulation of biological process (GO:0048518)	6244	465	305.3	+	1.52	9e-25	7.1e-22
regulation of cell communication (GO:0010646)	3424	302	167.42	+	1.8	1.79e-24	1.34e-21
muscle system process (GO:0003012)	289	69	14.13	+	4.88	3.47e-24	2.49e-21
regulation of localization (GO:0032879)	2734	257	133.68	+	1.92	8.09e-24	5.55e-21
multicellular organismal process (GO:0032501)	6909	496	337.82	+	1.47	1.41e-23	9.3e-21
supramolecular fiber organization (GO:0097435)	597	98	29.19	+	3.36	4.92e-23	2.77e-20
animal organ development (GO:0048513)	3187	283	155.83	+	1.82	4.76e-23	2.78e-20
movement of cell or subcellular component (GO:0006928)	1591	177	77.79	+	2.28	4.75e-23	2.88e-20
cell development (GO:0048468)	1615	179	78.97	+	2.27	4.59e-23	2.9e-20
muscle cell development (GO:0055001)	139	48	6.8	+	7.06	1.01e-22	5.29e-20
cell differentiation (GO:0030154)	3509	302	171.57	+	1.76	9.79e-23	5.32e-20
cellular developmental process (GO:0048869)	3562	304	174.17	+	1.75	1.8e-22	9.17e-20
muscle tissue development (GO:0060537)	280	65	13.69	+	4.75	2.77e-22	1.37e-19
Unclassified (UNCLASSIFIED)	2745	41	134.22	-	0.31	3.68e-22	1.71e-19
biological_process (GO:0008150)	17850	966	872.78	+	1.11	3.68e-22	1.76e-19
biological regulation (GO:0065007)	12571	763	614.66	+	1.24	4.29e-22	1.94e-19
regulation of developmental process (GO:0050793)	2441	232	119.35	+	1.94	7.32e-22	3.21e-19
striated muscle tissue development (GO:0014706)	265	62	12.96	+	4.78	1.87e-21	7.96e-19
negative regulation of biological process (GO:0048519)	5541	414	270.93	+	1.53	2.85e-21	1.19e-18
muscle contraction (GO:0006936)	243	59	11.88	+	4.97	3.81e-21	1.54e-18
regulation of signal transduction (GO:0009966)	3047	268	148.98	+	1.8	4.14e-21	1.63e-18
anatomical structure formation involved in morphogenesis (GO:0048646)	870	116	42.54	+	2.73	1.79e-20	6.9e-18
regulation of biological quality (GO:0065008)	4007	323	195.92	+	1.65	2.59e-20	9.71e-18
tissue development (GO:0009888)	1732	178	84.69	+	2.1	9.6e-20	3.52e-17
cardiac muscle tissue development (GO:0048738)	148	45	7.24	+	6.22	1.4e-19	4.92e-17
regulation of biological process (GO:0050789)	11856	722	579.7	+	1.25	1.4e-19	5.01e-17
localization (GO:0051179)	5807	421	283.94	+	1.48	2.17e-19	7.45e-17
cytoskeleton organization (GO:0007010)	1204	139	58.87	+	2.36	2.63e-19	8.82e-17
regulation of cellular process (GO:0050794)	11302	693	552.62	+	1.25	1.18e-18	3.88e-16
regulation of molecular function (GO:0065009)	3178	267	155.39	+	1.72	1.77e-18	5.7e-16
nervous system development (GO:0007399)	2189	205	107.03	+	1.92	1.93e-18	6.08e-16
regulation of cellular component movement (GO:0051270)	1026	123	50.17	+	2.45	2.69e-18	8.33e-16
regulation of anatomical structure morphogenesis (GO:0022603)	955	117	46.7	+	2.51	4.71e-18	1.43e-15
striated muscle cell development (GO:0055002)	91	34	4.45	+	7.64	2.51e-17	7.46e-15
regulation of multicellular organismal process (GO:0051239)	2647	229	129.43	+	1.77	6.44e-17	1.88e-14
cellular component morphogenesis (GO:0032989)	604	86	29.53	+	2.91	6.64e-17	1.9e-14
actomyosin structure organization (GO:0031032)	104	35	5.09	+	6.88	1.21e-16	3.41e-14
positive regulation of molecular function (GO:0044093)	1766	171	86.35	+	1.98	1.45e-16	4.02e-14
regulation of intracellular signal transduction (GO:1902531)	1768	171	86.45	+	1.98	1.52e-16	4.13e-14
regulation of actin filament-based process (GO:0032970)	396	66	19.36	+	3.41	4.11e-16	1.1e-13
response to organic substance (GO:0010033)	2995	247	146.44	+	1.69	4.9e-16	1.29e-13
response to stimulus (GO:0050896)	8496	546	415.42	+	1.31	8.01e-16	2.07e-13
cell adhesion (GO:0007155)	951	111	46.5	+	2.39	8.61e-16	2.19e-13
biological adhesion (GO:0022610)	957	111	46.79	+	2.37	1.2e-15	3e-13
regulation of cell migration (GO:0030334)	885	105	43.27	+	2.43	2.12e-15	5.23e-13
cardiocyte differentiation (GO:0035051)	102	33	4.99	+	6.62	2.32e-15	5.62e-13
positive regulation of cellular component organization (GO:0051130)	1135	123	55.5	+	2.22	3.3e-15	7.9e-13
cell morphogenesis (GO:0000902)	711	91	34.76	+	2.62	3.36e-15	7.91e-13
cell morphogenesis involved in differentiation (GO:0000904)	554	78	27.09	+	2.88	3.44e-15	7.99e-13
actin filament-based movement (GO:0030048)	119	35	5.82	+	6.02	3.67e-15	8.38e-13
muscle organ development (GO:0007517)	280	53	13.69	+	3.87	3.9e-15	8.66e-13
organelle organization (GO:0006996)	3574	278	174.75	+	1.59	3.97e-15	8.69e-13
cellular response to chemical stimulus (GO:0070887)	2898	238	141.7	+	1.68	3.89e-15	8.77e-13
regulation of catalytic activity (GO:0050790)	2516	214	123.02	+	1.74	4.46e-15	9.64e-13
regulation of cell motility (GO:2000145)	947	109	46.3	+	2.35	4.68e-15	9.98e-13
myofibril assembly (GO:0030239)	54	25	2.64	+	9.47	8.67e-15	1.82e-12
regulation of locomotion (GO:0040012)	990	111	48.41	+	2.29	1.07e-14	2.22e-12
cardiac muscle cell differentiation (GO:0055007)	76	28	3.72	+	7.53	2.17e-14	4.45e-12
enzyme linked receptor protein signaling pathway (GO:0007167)	726	90	35.5	+	2.54	2.77e-14	5.59e-12
cellular response to organic substance (GO:0071310)	2331	200	113.98	+	1.75	2.88e-14	5.76e-12
cardiac cell development (GO:0055006)	58	25	2.84	+	8.82	3.14e-14	6.19e-12
regulation of transport (GO:0051049)	1758	163	85.96	+	1.9	3.39e-14	6.61e-12
regulation of response to stimulus (GO:0048583)	4240	312	207.32	+	1.5	4.03e-14	7.76e-12
cardiac muscle cell development (GO:0055013)	53	24	2.59	+	9.26	4.37e-14	8.3e-12
cellular localization (GO:0051641)	3003	239	146.83	+	1.63	8.21e-14	1.54e-11
cellular response to stimulus (GO:0051716)	6770	448	331.02	+	1.35	8.79e-14	1.63e-11
locomotion (GO:0040011)	1339	133	65.47	+	2.03	1.17e-13	2.15e-11
response to chemical (GO:0042221)	4369	317	213.62	+	1.48	1.36e-13	2.46e-11
negative regulation of cell communication (GO:0010648)	1373	135	67.13	+	2.01	1.4e-13	2.51e-11
negative regulation of signaling (GO:0023057)	1376	135	67.28	+	2.01	1.53e-13	2.7e-11
negative regulation of signal transduction (GO:0009968)	1276	128	62.39	+	2.05	1.6e-13	2.8e-11
actin filament organization (GO:0007015)	270	49	13.2	+	3.71	1.74e-13	3.01e-11
cellular component assembly involved in morphogenesis (GO:0010927)	92	29	4.5	+	6.45	1.98e-13	3.39e-11
response to growth factor (GO:0070848)	532	72	26.01	+	2.77	2.39e-13	4.05e-11
striated muscle contraction (GO:0006941)	109	31	5.33	+	5.82	2.92e-13	4.89e-11
cell junction organization (GO:0034330)	501	69	24.5	+	2.82	3.68e-13	6.11e-11
regulation of protein metabolic process (GO:0051246)	2595	212	126.88	+	1.67	3.86e-13	6.34e-11
regulation of cellular protein metabolic process (GO:0032268)	2437	202	119.16	+	1.7	3.97e-13	6.45e-11
response to endogenous stimulus (GO:0009719)	1416	136	69.24	+	1.96	5.17e-13	8.32e-11
neurogenesis (GO:0022008)	1369	133	66.94	+	1.99	5.46e-13	8.7e-11
regulation of blood circulation (GO:1903522)	285	49	13.94	+	3.52	1.01e-12	1.6e-10
positive regulation of metabolic process (GO:0009893)	3719	276	181.84	+	1.52	1.19e-12	1.85e-10
cardiac chamber morphogenesis (GO:0003206)	117	31	5.72	+	5.42	1.41e-12	2.18e-10
heart morphogenesis (GO:0003007)	237	44	11.59	+	3.8	1.54e-12	2.36e-10
intracellular signal transduction (GO:0035556)	1575	145	77.01	+	1.88	1.67e-12	2.53e-10
heart process (GO:0003015)	102	29	4.99	+	5.81	1.71e-12	2.57e-10
cell junction assembly (GO:0034329)	280	48	13.69	+	3.51	1.9e-12	2.83e-10
cell communication (GO:0007154)	5572	378	272.44	+	1.39	1.93e-12	2.84e-10
regulation of hydrolase activity (GO:0051336)	1308	127	63.96	+	1.99	1.96e-12	2.87e-10
regulation of system process (GO:0044057)	583	74	28.51	+	2.6	2.37e-12	3.43e-10
positive regulation of developmental process (GO:0051094)	1259	123	61.56	+	2	3.33e-12	4.77e-10
cellular response to endogenous stimulus (GO:0071495)	1146	115	56.03	+	2.05	4.28e-12	5.92e-10
regulation of phosphorus metabolic process (GO:0051174)	1611	146	78.77	+	1.85	4.27e-12	5.97e-10
cellular response to growth factor stimulus (GO:0071363)	503	67	24.59	+	2.72	4.23e-12	6.02e-10
regulation of phosphate metabolic process (GO:0019220)	1611	146	78.77	+	1.85	4.27e-12	6.02e-10
generation of neurons (GO:0048699)	1249	122	61.07	+	2	4.46e-12	6.12e-10
regulation of heart contraction (GO:0008016)	239	43	11.69	+	3.68	6.85e-12	9.24e-10
regulation of cell projection organization (GO:0031344)	638	77	31.2	+	2.47	6.82e-12	9.28e-10
positive regulation of catalytic activity (GO:0043085)	1415	132	69.19	+	1.91	7.98e-12	1.07e-09
negative regulation of response to stimulus (GO:0048585)	1804	157	88.21	+	1.78	1.01e-11	1.34e-09
regulation of plasma membrane bounded cell projection organization (GO:0120035)	621	75	30.36	+	2.47	1.29e-11	1.7e-09
actin-mediated cell contraction (GO:0070252)	89	26	4.35	+	5.97	1.45e-11	1.89e-09
animal organ morphogenesis (GO:0009887)	945	99	46.21	+	2.14	1.51e-11	1.95e-09
positive regulation of signaling (GO:0023056)	1720	151	84.1	+	1.8	1.75e-11	2.24e-09
tissue morphogenesis (GO:0048729)	532	68	26.01	+	2.61	1.91e-11	2.43e-09
signaling (GO:0023052)	5485	368	268.19	+	1.37	1.98e-11	2.5e-09
regulation of protein modification process (GO:0031399)	1633	145	79.85	+	1.82	2.02e-11	2.53e-09
blood vessel development (GO:0001568)	489	64	23.91	+	2.68	2.19e-11	2.71e-09
circulatory system process (GO:0003013)	476	63	23.27	+	2.71	2.32e-11	2.86e-09
regulation of organelle organization (GO:0033043)	1188	115	58.09	+	1.98	2.68e-11	3.28e-09
regulation of anatomical structure size (GO:0090066)	506	65	24.74	+	2.63	2.87e-11	3.48e-09
tube morphogenesis (GO:0035239)	645	76	31.54	+	2.41	2.98e-11	3.59e-09
regulation of supramolecular fiber organization (GO:1902903)	375	54	18.34	+	2.95	3.24e-11	3.88e-09
vesicle-mediated transport (GO:0016192)	1958	165	95.74	+	1.72	3.62e-11	4.29e-09
positive regulation of transport (GO:0051050)	936	97	45.77	+	2.12	3.79e-11	4.46e-09
protein localization (GO:0008104)	2158	177	105.52	+	1.68	4.08e-11	4.77e-09
regulation of cytoskeleton organization (GO:0051493)	519	66	25.38	+	2.6	4.41e-11	5.04e-09
transmembrane receptor protein tyrosine kinase signaling pathway (GO:0007169)	519	66	25.38	+	2.6	4.41e-11	5.07e-09
regulation of neuron projection development (GO:0010975)	438	59	21.42	+	2.75	4.37e-11	5.07e-09
sarcomere organization (GO:0045214)	33	17	1.61	+	10.54	4.66e-11	5.29e-09
positive regulation of cellular metabolic process (GO:0031325)	3238	241	158.32	+	1.52	4.81e-11	5.42e-09
regulation of cell differentiation (GO:0045595)	1576	140	77.06	+	1.82	4.89e-11	5.47e-09
response to organonitrogen compound (GO:0010243)	997	101	48.75	+	2.07	5.02e-11	5.58e-09
protein localization to plasma membrane (GO:0072659)	195	37	9.53	+	3.88	5.36e-11	5.87e-09
positive regulation of cell communication (GO:0010647)	1714	149	83.81	+	1.78	5.33e-11	5.88e-09
positive regulation of macromolecule metabolic process (GO:0010604)	3431	252	167.76	+	1.5	5.47e-11	5.95e-09
cell motility (GO:0048870)	1103	108	53.93	+	2	6.12e-11	6.57e-09
localization of cell (GO:0051674)	1103	108	53.93	+	2	6.12e-11	6.62e-09
macromolecule localization (GO:0033036)	2550	200	124.68	+	1.6	6.5e-11	6.93e-09
vasculature development (GO:0001944)	512	65	25.03	+	2.6	6.59e-11	6.97e-09
cardiac chamber development (GO:0003205)	158	33	7.73	+	4.27	6.72e-11	7.06e-09
regulation of cell adhesion (GO:0030155)	726	81	35.5	+	2.28	7.05e-11	7.37e-09
heart contraction (GO:0060047)	89	25	4.35	+	5.74	7.23e-11	7.5e-09
response to oxygen-containing compound (GO:1901700)	1584	140	77.45	+	1.81	8.04e-11	8.29e-09
regulation of muscle system process (GO:0090257)	229	40	11.2	+	3.57	8.18e-11	8.38e-09
cell projection organization (GO:0030030)	1212	115	59.26	+	1.94	9.71e-11	9.82e-09
cardiac muscle contraction (GO:0060048)	75	23	3.67	+	6.27	9.67e-11	9.85e-09
detection of chemical stimulus involved in sensory perception (GO:0050907)	486	0	23.76	-	< 0.01	1.16e-10	1.17e-08
detection of stimulus involved in sensory perception (GO:0050906)	554	1	27.09	-	0.04	1.27e-10	1.27e-08
regulation of actin cytoskeleton organization (GO:0032956)	356	51	17.41	+	2.93	1.36e-10	1.35e-08
regulation of cellular localization (GO:0060341)	836	88	40.88	+	2.15	1.54e-10	1.52e-08
plasma membrane bounded cell projection organization (GO:0120036)	1166	111	57.01	+	1.95	1.76e-10	1.73e-08
positive regulation of cell migration (GO:0030335)	518	64	25.33	+	2.53	1.88e-10	1.83e-08
cell migration (GO:0016477)	965	97	47.18	+	2.06	1.9e-10	1.84e-08
neuron projection development (GO:0031175)	683	77	33.4	+	2.31	1.91e-10	1.84e-08
signal transduction (GO:0007165)	5138	344	251.22	+	1.37	1.97e-10	1.88e-08
cellular component assembly (GO:0022607)	2438	191	119.21	+	1.6	2.06e-10	1.95e-08
phosphorylation (GO:0016310)	1022	101	49.97	+	2.02	2.16e-10	2.03e-08
blood circulation (GO:0008015)	385	53	18.82	+	2.82	2.15e-10	2.03e-08
positive regulation of locomotion (GO:0040017)	558	67	27.28	+	2.46	2.26e-10	2.11e-08
negative regulation of cell population proliferation (GO:0008285)	689	77	33.69	+	2.29	2.29e-10	2.12e-08
regulation of metabolic process (GO:0019222)	6847	434	334.79	+	1.3	2.37e-10	2.18e-08
neuron differentiation (GO:0030182)	1028	101	50.26	+	2.01	2.5e-10	2.29e-08
phosphorus metabolic process (GO:0006793)	1933	160	94.51	+	1.69	2.52e-10	2.3e-08
muscle filament sliding (GO:0030049)	38	17	1.86	+	9.15	2.59e-10	2.34e-08
actin-myosin filament sliding (GO:0033275)	38	17	1.86	+	9.15	2.59e-10	2.35e-08
regulation of ion transport (GO:0043269)	1337	122	65.37	+	1.87	2.77e-10	2.48e-08
phosphate-containing compound metabolic process (GO:0006796)	1906	158	93.19	+	1.7	2.82e-10	2.52e-08
regulation of phosphorylation (GO:0042325)	1400	126	68.45	+	1.84	2.87e-10	2.54e-08
regulation of muscle contraction (GO:0006937)	159	32	7.77	+	4.12	2.95e-10	2.6e-08
negative regulation of developmental process (GO:0051093)	870	90	42.54	+	2.12	2.99e-10	2.62e-08
establishment of localization in cell (GO:0051649)	2365	186	115.64	+	1.61	3.11e-10	2.71e-08
regulation of cell population proliferation (GO:0042127)	1640	141	80.19	+	1.76	3.43e-10	2.98e-08
regulation of protein phosphorylation (GO:0001932)	1210	113	59.16	+	1.91	3.58e-10	3.08e-08
positive regulation of signal transduction (GO:0009967)	1551	135	75.84	+	1.78	3.96e-10	3.4e-08
response to nitrogen compound (GO:1901698)	1085	104	53.05	+	1.96	4.52e-10	3.86e-08
protein localization to cell periphery (GO:1990778)	234	39	11.44	+	3.41	4.7e-10	3.99e-08
positive regulation of cell motility (GO:2000147)	543	65	26.55	+	2.45	4.79e-10	4.04e-08
positive regulation of cell projection organization (GO:0031346)	350	49	17.11	+	2.86	6.28e-10	5.27e-08
cell projection morphogenesis (GO:0048858)	503	61	24.59	+	2.48	9.3e-10	7.76e-08
negative regulation of protein metabolic process (GO:0051248)	1056	101	51.63	+	1.96	1.04e-09	8.61e-08
regulation of actin filament organization (GO:0110053)	276	42	13.5	+	3.11	1.18e-09	9.79e-08
tube development (GO:0035295)	841	86	41.12	+	2.09	1.22e-09	1.01e-07
detection of chemical stimulus involved in sensory perception of smell (GO:0050911)	441	0	21.56	-	< 0.01	1.38e-09	1.13e-07
positive regulation of nitrogen compound metabolic process (GO:0051173)	3058	224	149.52	+	1.5	1.4e-09	1.14e-07
positive regulation of cellular component movement (GO:0051272)	556	65	27.19	+	2.39	1.43e-09	1.16e-07
neuron development (GO:0048666)	833	85	40.73	+	2.09	1.71e-09	1.38e-07
regulation of cell death (GO:0010941)	1652	139	80.78	+	1.72	1.75e-09	1.4e-07
negative regulation of protein phosphorylation (GO:0001933)	351	48	17.16	+	2.8	1.87e-09	1.49e-07
negative regulation of cellular protein metabolic process (GO:0032269)	984	95	48.11	+	1.97	1.96e-09	1.55e-07
plasma membrane bounded cell projection morphogenesis (GO:0120039)	499	60	24.4	+	2.46	2.4e-09	1.89e-07
regulation of cell-substrate adhesion (GO:0010810)	217	36	10.61	+	3.39	2.44e-09	1.91e-07
regulation of programmed cell death (GO:0043067)	1517	130	74.17	+	1.75	2.62e-09	2.05e-07
cardiac ventricle development (GO:0003231)	118	26	5.77	+	4.51	2.66e-09	2.07e-07
regulation of cell morphogenesis (GO:0022604)	308	44	15.06	+	2.92	2.73e-09	2.11e-07
sensory perception of chemical stimulus (GO:0007606)	542	2	26.5	-	0.08	3.02e-09	2.32e-07
blood vessel morphogenesis (GO:0048514)	406	52	19.85	+	2.62	3.29e-09	2.52e-07
cell part morphogenesis (GO:0032990)	522	61	25.52	+	2.39	3.46e-09	2.64e-07
cardiac ventricle morphogenesis (GO:0003208)	69	20	3.37	+	5.93	3.62e-09	2.75e-07
protein phosphorylation (GO:0006468)	684	73	33.44	+	2.18	3.76e-09	2.84e-07
establishment of localization (GO:0051234)	4653	311	227.51	+	1.37	3.87e-09	2.9e-07
neuron projection morphogenesis (GO:0048812)	495	59	24.2	+	2.44	3.98e-09	2.97e-07
extracellular matrix organization (GO:0030198)	382	50	18.68	+	2.68	4.11e-09	3.06e-07
extracellular structure organization (GO:0043062)	383	50	18.73	+	2.67	4.32e-09	3.2e-07
negative regulation of cellular component movement (GO:0051271)	290	42	14.18	+	2.96	4.38e-09	3.21e-07
negative regulation of cell migration (GO:0030336)	267	40	13.06	+	3.06	4.37e-09	3.22e-07
cellular response to organonitrogen compound (GO:0071417)	591	66	28.9	+	2.28	4.58e-09	3.33e-07
negative regulation of locomotion (GO:0040013)	314	44	15.35	+	2.87	4.61e-09	3.33e-07
regulation of cellular component size (GO:0032535)	384	50	18.78	+	2.66	4.56e-09	3.33e-07
protein modification process (GO:0036211)	3019	219	147.62	+	1.48	4.67e-09	3.35e-07
cellular protein modification process (GO:0006464)	3019	219	147.62	+	1.48	4.67e-09	3.37e-07
external encapsulating structure organization (GO:0045229)	385	50	18.82	+	2.66	4.83e-09	3.45e-07
positive regulation of protein metabolic process (GO:0051247)	1538	130	75.2	+	1.73	4.87e-09	3.46e-07
positive regulation of phosphate metabolic process (GO:0045937)	989	94	48.36	+	1.94	5.19e-09	3.66e-07
positive regulation of phosphorus metabolic process (GO:0010562)	989	94	48.36	+	1.94	5.19e-09	3.67e-07
regulation of apoptotic process (GO:0042981)	1479	126	72.32	+	1.74	5.5e-09	3.86e-07
regulation of multicellular organismal development (GO:2000026)	1318	116	64.44	+	1.8	5.59e-09	3.9e-07
negative regulation of cell motility (GO:2000146)	282	41	13.79	+	2.97	6.05e-09	4.21e-07
positive regulation of ion transport (GO:0043270)	709	74	34.67	+	2.13	7.01e-09	4.85e-07
regulation of cellular metabolic process (GO:0031323)	6106	387	298.56	+	1.3	7.09e-09	4.88e-07
regulation of MAPK cascade (GO:0043408)	694	73	33.93	+	2.15	7.63e-09	5.23e-07
cellular response to peptide hormone stimulus (GO:0071375)	274	40	13.4	+	2.99	8.37e-09	5.71e-07
regulation of protein localization (GO:0032880)	899	87	43.96	+	1.98	1.03e-08	7.03e-07
regulation of epithelial cell migration (GO:0010632)	231	36	11.29	+	3.19	1.05e-08	7.08e-07
cell surface receptor signaling pathway (GO:0007166)	2486	186	121.55	+	1.53	1.12e-08	7.52e-07
axon development (GO:0061564)	419	52	20.49	+	2.54	1.12e-08	7.54e-07
cell morphogenesis involved in neuron differentiation (GO:0048667)	449	54	21.95	+	2.46	1.15e-08	7.71e-07
positive regulation of multicellular organismal process (GO:0051240)	1386	119	67.77	+	1.76	1.24e-08	8.24e-07
cellular response to nitrogen compound (GO:1901699)	651	69	31.83	+	2.17	1.38e-08	9.16e-07
regulation of macromolecule metabolic process (GO:0060255)	6301	395	308.09	+	1.28	1.46e-08	9.57e-07
cell-cell adhesion (GO:0098609)	514	59	25.13	+	2.35	1.45e-08	9.57e-07
regulation of cellular response to growth factor stimulus (GO:0090287)	292	41	14.28	+	2.87	1.47e-08	9.6e-07
positive regulation of hydrolase activity (GO:0051345)	777	78	37.99	+	2.05	1.73e-08	1.13e-06
organonitrogen compound metabolic process (GO:1901564)	5251	339	256.75	+	1.32	1.94e-08	1.26e-06
response to hormone (GO:0009725)	807	80	39.46	+	2.03	1.95e-08	1.26e-06
cellular response to hormone stimulus (GO:0032870)	523	59	25.57	+	2.31	2.12e-08	1.37e-06
head development (GO:0060322)	788	78	38.53	+	2.02	2.32e-08	1.49e-06
negative regulation of protein modification process (GO:0031400)	549	61	26.84	+	2.27	2.37e-08	1.52e-06
cell-substrate adhesion (GO:0031589)	185	31	9.05	+	3.43	2.54e-08	1.61e-06
transport (GO:0006810)	4501	298	220.08	+	1.35	2.56e-08	1.62e-06
negative regulation of cell differentiation (GO:0045596)	638	67	31.2	+	2.15	3.04e-08	1.91e-06
positive regulation of intracellular signal transduction (GO:1902533)	1015	93	49.63	+	1.87	3.05e-08	1.91e-06
regulation of kinase activity (GO:0043549)	908	86	44.4	+	1.94	3.04e-08	1.92e-06
negative regulation of phosphorylation (GO:0042326)	395	49	19.31	+	2.54	3.32e-08	2.07e-06
cellular protein metabolic process (GO:0044267)	3643	250	178.13	+	1.4	3.39e-08	2.1e-06
cellular response to oxygen-containing compound (GO:1901701)	1058	96	51.73	+	1.86	3.46e-08	2.14e-06
positive regulation of transmembrane transport (GO:0034764)	233	35	11.39	+	3.07	3.79e-08	2.33e-06
positive regulation of ion transmembrane transport (GO:0034767)	233	35	11.39	+	3.07	3.79e-08	2.34e-06
muscle organ morphogenesis (GO:0048644)	73	19	3.57	+	5.32	3.85e-08	2.35e-06
regulation of striated muscle contraction (GO:0006942)	91	21	4.45	+	4.72	4.48e-08	2.73e-06
positive regulation of cell differentiation (GO:0045597)	827	80	40.44	+	1.98	4.53e-08	2.75e-06
cardiac muscle tissue morphogenesis (GO:0055008)	58	17	2.84	+	5.99	4.67e-08	2.82e-06
developmental growth (GO:0048589)	354	45	17.31	+	2.6	4.74e-08	2.85e-06
muscle tissue morphogenesis (GO:0060415)	66	18	3.23	+	5.58	4.79e-08	2.87e-06
regulation of endothelial cell migration (GO:0010594)	170	29	8.31	+	3.49	5.05e-08	3.02e-06
cellular protein localization (GO:0034613)	1639	132	80.14	+	1.65	5.23e-08	3.12e-06
positive regulation of cellular protein metabolic process (GO:0032270)	1456	121	71.19	+	1.7	5.29e-08	3.14e-06
growth (GO:0040007)	357	45	17.46	+	2.58	5.75e-08	3.4e-06
regulation of primary metabolic process (GO:0080090)	5892	370	288.09	+	1.28	5.95e-08	3.5e-06
regulation of protein kinase activity (GO:0045859)	797	77	38.97	+	1.98	7.2e-08	4.22e-06
cellular macromolecule localization (GO:0070727)	1645	132	80.43	+	1.64	7.36e-08	4.3e-06
cellular response to peptide (GO:1901653)	334	43	16.33	+	2.63	7.5e-08	4.37e-06
central nervous system development (GO:0007417)	991	90	48.46	+	1.86	7.59e-08	4.4e-06
detection of chemical stimulus (GO:0009593)	522	3	25.52	-	0.12	7.85e-08	4.53e-06
regulation of anion transport (GO:0044070)	860	81	42.05	+	1.93	8.74e-08	5.03e-06
sensory perception of smell (GO:0007608)	468	2	22.88	-	0.09	9.27e-08	5.32e-06
regulation of nitrogen compound metabolic process (GO:0051171)	5688	358	278.12	+	1.29	9.63e-08	5.51e-06
cellular component biogenesis (GO:0044085)	2701	194	132.07	+	1.47	9.97e-08	5.68e-06
regulation of heart rate (GO:0002027)	97	21	4.74	+	4.43	1.15e-07	6.5e-06
regulation of cellular protein localization (GO:1903827)	564	60	27.58	+	2.18	1.15e-07	6.51e-06
positive regulation of phosphorylation (GO:0042327)	913	84	44.64	+	1.88	1.29e-07	7.27e-06
negative regulation of phosphate metabolic process (GO:0045936)	513	56	25.08	+	2.23	1.51e-07	8.5e-06
negative regulation of phosphorus metabolic process (GO:0010563)	514	56	25.13	+	2.23	1.57e-07	8.78e-06
regulation of ion transmembrane transport (GO:0034765)	580	61	28.36	+	2.15	1.65e-07	9.19e-06
axonogenesis (GO:0007409)	384	46	18.78	+	2.45	1.7e-07	9.42e-06
regulation of transmembrane transport (GO:0034762)	585	61	28.6	+	2.13	1.87e-07	1.03e-05
regulation of cellular component biogenesis (GO:0044087)	967	87	47.28	+	1.84	1.87e-07	1.03e-05
response to inorganic substance (GO:0010035)	542	58	26.5	+	2.19	1.86e-07	1.03e-05
response to wounding (GO:0009611)	543	58	26.55	+	2.18	1.92e-07	1.05e-05
negative regulation of molecular function (GO:0044092)	1171	100	57.26	+	1.75	2.23e-07	1.22e-05
cellular response to insulin stimulus (GO:0032869)	173	28	8.46	+	3.31	2.24e-07	1.22e-05
mesenchyme development (GO:0060485)	218	32	10.66	+	3	2.29e-07	1.24e-05
negative regulation of metabolic process (GO:0009892)	3104	215	151.77	+	1.42	2.41e-07	1.3e-05
axon guidance (GO:0007411)	278	37	13.59	+	2.72	2.46e-07	1.32e-05
regulation of cell shape (GO:0008360)	153	26	7.48	+	3.48	2.62e-07	1.4e-05
chemical homeostasis (GO:0048878)	1124	97	54.96	+	1.76	2.62e-07	1.4e-05
neuron projection guidance (GO:0097485)	279	37	13.64	+	2.71	2.66e-07	1.42e-05
ventricular cardiac muscle tissue development (GO:0003229)	51	15	2.49	+	6.02	2.76e-07	1.47e-05
regulation of cell-matrix adhesion (GO:0001952)	123	23	6.01	+	3.82	2.92e-07	1.54e-05
response to peptide hormone (GO:0043434)	400	47	19.56	+	2.4	2.98e-07	1.57e-05
positive regulation of kinase activity (GO:0033674)	608	62	29.73	+	2.09	3.15e-07	1.66e-05
regulation of transferase activity (GO:0051338)	1025	90	50.12	+	1.8	3.71e-07	1.94e-05
detection of stimulus (GO:0051606)	718	9	35.11	-	0.26	3.73e-07	1.95e-05
positive regulation of transferase activity (GO:0051347)	687	67	33.59	+	1.99	3.92e-07	2.04e-05
brain development (GO:0007420)	745	71	36.43	+	1.95	4.23e-07	2.2e-05
embryo development (GO:0009790)	971	86	47.48	+	1.81	4.29e-07	2.22e-05
response to insulin (GO:0032868)	237	33	11.59	+	2.85	4.39e-07	2.26e-05
system process (GO:0003008)	2040	152	99.75	+	1.52	4.54e-07	2.33e-05
ameboidal-type cell migration (GO:0001667)	180	28	8.8	+	3.18	4.59e-07	2.35e-05
negative regulation of intracellular signal transduction (GO:1902532)	492	53	24.06	+	2.2	4.66e-07	2.38e-05
establishment of protein localization (GO:0045184)	1558	123	76.18	+	1.61	4.88e-07	2.47e-05
macromolecule modification (GO:0043412)	3240	221	158.42	+	1.4	4.85e-07	2.47e-05
muscle fiber development (GO:0048747)	46	14	2.25	+	6.22	4.88e-07	2.47e-05
regulation of actin filament-based movement (GO:1903115)	39	13	1.91	+	6.82	5.3e-07	2.67e-05
positive regulation of endothelial cell migration (GO:0010595)	108	21	5.28	+	3.98	5.43e-07	2.73e-05
homeostatic process (GO:0042592)	1659	129	81.12	+	1.59	5.49e-07	2.75e-05
intracellular transport (GO:0046907)	1499	119	73.29	+	1.62	5.84e-07	2.91e-05
regulation of cardiac muscle contraction by calcium ion signaling (GO:0010882)	26	11	1.27	+	8.65	5.98e-07	2.97e-05
regulation of the force of heart contraction (GO:0002026)	26	11	1.27	+	8.65	5.98e-07	2.98e-05
protein metabolic process (GO:0019538)	4218	274	206.24	+	1.33	6.28e-07	3.11e-05
wound healing (GO:0042060)	444	49	21.71	+	2.26	6.68e-07	3.3e-05
positive regulation of response to stimulus (GO:0048584)	2278	165	111.38	+	1.48	7.04e-07	3.46e-05
negative regulation of transport (GO:0051051)	427	48	20.88	+	2.3	7.12e-07	3.49e-05
cellular metabolic process (GO:0044237)	7570	449	370.14	+	1.21	7.33e-07	3.58e-05
membrane organization (GO:0061024)	956	84	46.74	+	1.8	7.87e-07	3.83e-05
positive regulation of supramolecular fiber organization (GO:1902905)	197	29	9.63	+	3.01	7.93e-07	3.85e-05
negative regulation of catalytic activity (GO:0043086)	814	75	39.8	+	1.88	8.08e-07	3.91e-05
cell-cell junction organization (GO:0045216)	186	28	9.09	+	3.08	8.24e-07	3.97e-05
regulation of cell development (GO:0060284)	490	52	23.96	+	2.17	8.3e-07	3.99e-05
negative regulation of cell death (GO:0060548)	998	87	48.8	+	1.78	8.45e-07	4.05e-05
cellular response to external stimulus (GO:0071496)	342	41	16.72	+	2.45	8.79e-07	4.19e-05
epithelium development (GO:0060429)	1097	93	53.64	+	1.73	8.77e-07	4.19e-05
regulation of angiogenesis (GO:0045765)	277	36	13.54	+	2.66	8.85e-07	4.2e-05
negative regulation of multicellular organismal process (GO:0051241)	1002	87	48.99	+	1.78	8.93e-07	4.23e-05
negative regulation of nitrogen compound metabolic process (GO:0051172)	2390	171	116.86	+	1.46	9.09e-07	4.29e-05
Golgi vesicle transport (GO:0048193)	396	45	19.36	+	2.32	9.14e-07	4.3e-05
regulation of membrane potential (GO:0042391)	436	48	21.32	+	2.25	9.39e-07	4.41e-05
negative regulation of cellular metabolic process (GO:0031324)	2580	182	126.15	+	1.44	9.59e-07	4.49e-05
negative regulation of cellular component organization (GO:0051129)	718	68	35.11	+	1.94	1.01e-06	4.69e-05
cardiac myofibril assembly (GO:0055003)	16	9	0.78	+	11.5	1.04e-06	4.85e-05
regulation of vasculature development (GO:1901342)	281	36	13.74	+	2.62	1.05e-06	4.86e-05
regulation of cardiac muscle contraction (GO:0055117)	75	17	3.67	+	4.64	1.05e-06	4.86e-05
response to peptide (GO:1901652)	480	51	23.47	+	2.17	1.06e-06	4.91e-05
regulation of actin polymerization or depolymerization (GO:0008064)	189	28	9.24	+	3.03	1.09e-06	5.03e-05
regulation of intracellular transport (GO:0032386)	361	42	17.65	+	2.38	1.1e-06	5.04e-05
regulation of actin filament length (GO:0030832)	190	28	9.29	+	3.01	1.2e-06	5.48e-05
cellular macromolecule metabolic process (GO:0044260)	4963	312	242.67	+	1.29	1.21e-06	5.53e-05
positive regulation of protein modification process (GO:0031401)	1061	90	51.88	+	1.73	1.26e-06	5.72e-05
negative regulation of protein kinase activity (GO:0006469)	238	32	11.64	+	2.75	1.29e-06	5.86e-05
negative regulation of programmed cell death (GO:0043069)	907	80	44.35	+	1.8	1.34e-06	6.05e-05
regulation of transmembrane receptor protein serine/threonine kinase signaling pathway (GO:0090092)	251	33	12.27	+	2.69	1.38e-06	6.23e-05
cell-matrix adhesion (GO:0007160)	126	22	6.16	+	3.57	1.45e-06	6.5e-05
sensory perception (GO:0007600)	973	18	47.58	-	0.38	1.45e-06	6.5e-05
learning or memory (GO:0007611)	252	33	12.32	+	2.68	1.5e-06	6.69e-05
response to stress (GO:0006950)	3634	240	177.69	+	1.35	1.52e-06	6.74e-05
regulation of protein-containing complex assembly (GO:0043254)	454	49	22.2	+	2.21	1.52e-06	6.75e-05
cellular response to vascular endothelial growth factor stimulus (GO:0035924)	44	13	2.15	+	6.04	1.65e-06	7.29e-05
positive regulation of cell adhesion (GO:0045785)	435	47	21.27	+	2.21	1.78e-06	7.84e-05
regulation of epithelial cell proliferation (GO:0050678)	342	40	16.72	+	2.39	1.84e-06	8.09e-05
regulation of smooth muscle cell migration (GO:0014910)	61	15	2.98	+	5.03	1.89e-06	8.31e-05
positive regulation of epithelial cell migration (GO:0010634)	150	24	7.33	+	3.27	1.93e-06	8.45e-05
integrin-mediated signaling pathway (GO:0007229)	98	19	4.79	+	3.97	1.93e-06	8.45e-05
behavior (GO:0007610)	548	55	26.79	+	2.05	1.95e-06	8.51e-05
ventricular cardiac muscle tissue morphogenesis (GO:0055010)	45	13	2.2	+	5.91	2.03e-06	8.83e-05
endomembrane system organization (GO:0010256)	488	51	23.86	+	2.14	2.07e-06	8.99e-05
negative regulation of macromolecule metabolic process (GO:0010605)	2861	196	139.89	+	1.4	2.16e-06	9.31e-05
regulation of protein serine/threonine kinase activity (GO:0071900)	490	51	23.96	+	2.13	2.18e-06	9.4e-05
negative regulation of apoptotic process (GO:0043066)	888	78	43.42	+	1.8	2.25e-06	9.68e-05
positive regulation of protein phosphorylation (GO:0001934)	828	74	40.49	+	1.83	2.29e-06	9.82e-05
vascular endothelial growth factor receptor signaling pathway (GO:0048010)	71	16	3.47	+	4.61	2.32e-06	9.91e-05
protein localization to membrane (GO:0072657)	537	54	26.26	+	2.06	2.41e-06	0.000103
response to metal ion (GO:0010038)	371	42	18.14	+	2.32	2.46e-06	0.000104
regulation of cation transmembrane transport (GO:1904062)	372	42	18.19	+	2.31	2.56e-06	0.000108
positive regulation of MAPK cascade (GO:0043410)	520	53	25.43	+	2.08	2.58e-06	0.000109
skeletal muscle tissue development (GO:0007519)	121	21	5.92	+	3.55	2.71e-06	0.000114
response to decreased oxygen levels (GO:0036293)	358	41	17.5	+	2.34	2.93e-06	0.000123
regulation of cell-substrate junction assembly (GO:0090109)	64	15	3.13	+	4.79	3.15e-06	0.000132
regulation of focal adhesion assembly (GO:0051893)	64	15	3.13	+	4.79	3.15e-06	0.000132
cell cycle arrest (GO:0007050)	144	23	7.04	+	3.27	3.22e-06	0.000134
regulation of cellular response to stress (GO:0080135)	685	64	33.49	+	1.91	3.38e-06	0.000141
post-Golgi vesicle-mediated transport (GO:0006892)	134	22	6.55	+	3.36	3.53e-06	0.000147
regulation of neuron death (GO:1901214)	311	37	15.21	+	2.43	3.76e-06	0.000156
regulation of cellular response to transforming growth factor beta stimulus (GO:1903844)	124	21	6.06	+	3.46	3.81e-06	0.000157
response to mechanical stimulus (GO:0009612)	216	29	10.56	+	2.75	4.11e-06	0.000169
negative regulation of protein serine/threonine kinase activity (GO:0071901)	136	22	6.65	+	3.31	4.36e-06	0.000179
peptidyl-serine phosphorylation (GO:0018105)	182	26	8.9	+	2.92	4.73e-06	0.000193
response to transforming growth factor beta (GO:0071559)	159	24	7.77	+	3.09	4.73e-06	0.000194
response to abiotic stimulus (GO:0009628)	1162	94	56.82	+	1.65	4.76e-06	0.000194
actin filament bundle assembly (GO:0051017)	58	14	2.84	+	4.94	4.99e-06	0.000203
regulation of striated muscle cell apoptotic process (GO:0010662)	34	11	1.66	+	6.62	5.04e-06	0.000205
actin cytoskeleton reorganization (GO:0031532)	67	15	3.28	+	4.58	5.11e-06	0.000205
cardiac muscle hypertrophy (GO:0003300)	27	10	1.32	+	7.57	5.11e-06	0.000206
regulation of cardiocyte differentiation (GO:1905207)	27	10	1.32	+	7.57	5.11e-06	0.000206
regulation of vesicle-mediated transport (GO:0060627)	524	52	25.62	+	2.03	5.11e-06	0.000206
establishment or maintenance of cell polarity (GO:0007163)	195	27	9.53	+	2.83	5.26e-06	0.000211
regulation of muscle cell differentiation (GO:0051147)	138	22	6.75	+	3.26	5.38e-06	0.000215
positive regulation of protein kinase activity (GO:0045860)	534	53	26.11	+	2.03	5.67e-06	0.000226
positive regulation of ion transmembrane transporter activity (GO:0032414)	107	19	5.23	+	3.63	5.98e-06	0.000238
negative regulation of ion transport (GO:0043271)	307	36	15.01	+	2.4	6.3e-06	0.000248
response to drug (GO:0042493)	383	42	18.73	+	2.24	6.29e-06	0.000248
apoptotic process (GO:0006915)	912	78	44.59	+	1.75	6.27e-06	0.000249
response to oxygen levels (GO:0070482)	383	42	18.73	+	2.24	6.29e-06	0.000249
striated muscle hypertrophy (GO:0014897)	28	10	1.37	+	7.3	6.64e-06	0.000261
regulation of cell-substrate junction organization (GO:0150116)	69	15	3.37	+	4.45	6.96e-06	0.000272
regulation of anion transmembrane transport (GO:1903959)	109	19	5.33	+	3.56	7.56e-06	0.000294
dendrite development (GO:0016358)	109	19	5.33	+	3.56	7.56e-06	0.000295
regulation of peptide transport (GO:0090087)	600	57	29.34	+	1.94	7.55e-06	0.000295
neural crest cell differentiation (GO:0014033)	89	17	4.35	+	3.91	7.88e-06	0.000306
regulation of growth (GO:0040008)	657	61	32.12	+	1.9	7.96e-06	0.000308
skeletal muscle organ development (GO:0060538)	131	21	6.41	+	3.28	8.1e-06	0.000312
negative regulation of kinase activity (GO:0033673)	261	32	12.76	+	2.51	8.17e-06	0.000314
actin filament bundle organization (GO:0061572)	61	14	2.98	+	4.69	8.21e-06	0.000315
angiogenesis (GO:0001525)	314	36	15.35	+	2.34	8.88e-06	0.000339
regulation of transforming growth factor beta receptor signaling pathway (GO:0017015)	121	20	5.92	+	3.38	8.86e-06	0.000339
metabolic process (GO:0008152)	8333	479	407.45	+	1.18	9.05e-06	0.000345
positive regulation of cytoskeleton organization (GO:0051495)	214	28	10.46	+	2.68	9.26e-06	0.000352
regulation of stress-activated MAPK cascade (GO:0032872)	178	25	8.7	+	2.87	9.33e-06	0.000354
negative regulation of anion transport (GO:1903792)	202	27	9.88	+	2.73	9.4e-06	0.000356
myotube differentiation (GO:0014902)	62	14	3.03	+	4.62	9.64e-06	0.000364
response to oxidative stress (GO:0006979)	396	42	19.36	+	2.17	9.78e-06	0.000368
positive regulation of organelle organization (GO:0010638)	590	56	28.85	+	1.94	9.93e-06	0.000373
positive regulation of vasculature development (GO:1904018)	156	23	7.63	+	3.02	1.04e-05	0.00039
positive regulation of angiogenesis (GO:0045766)	156	23	7.63	+	3.02	1.04e-05	0.000391
vascular endothelial growth factor signaling pathway (GO:0038084)	23	9	1.12	+	8	1.07e-05	0.000397
regulation of protein transport (GO:0051223)	567	54	27.72	+	1.95	1.09e-05	0.000406
muscle hypertrophy (GO:0014896)	30	10	1.47	+	6.82	1.09e-05	0.000406
heart valve morphogenesis (GO:0003179)	54	13	2.64	+	4.92	1.11e-05	0.00041
response to hypoxia (GO:0001666)	344	38	16.82	+	2.26	1.18e-05	0.000437
regulation of stress-activated protein kinase signaling cascade (GO:0070302)	181	25	8.85	+	2.82	1.21e-05	0.000445
positive regulation of glucose import (GO:0046326)	38	11	1.86	+	5.92	1.22e-05	0.000449
collagen fibril organization (GO:0030199)	103	18	5.04	+	3.57	1.26e-05	0.000464
regulation of neuron apoptotic process (GO:0043523)	206	27	10.07	+	2.68	1.29e-05	0.000472
peptidyl-serine modification (GO:0018209)	206	27	10.07	+	2.68	1.29e-05	0.000473
morphogenesis of an epithelium (GO:0002009)	430	44	21.03	+	2.09	1.36e-05	0.000494
regulation of cardiac muscle cell apoptotic process (GO:0010665)	31	10	1.52	+	6.6	1.39e-05	0.000504
cellular homeostasis (GO:0019725)	888	75	43.42	+	1.73	1.44e-05	0.000521
Wnt signaling pathway (GO:0016055)	349	38	17.06	+	2.23	1.48e-05	0.000535
cell-cell signaling by wnt (GO:0198738)	349	38	17.06	+	2.23	1.48e-05	0.000536
positive regulation of cell-substrate adhesion (GO:0010811)	126	20	6.16	+	3.25	1.5e-05	0.000541
cardiac septum morphogenesis (GO:0060411)	65	14	3.18	+	4.41	1.53e-05	0.000551
regulation of glucose import (GO:0046324)	56	13	2.74	+	4.75	1.55e-05	0.000553
regulation of cardiac conduction (GO:1903779)	56	13	2.74	+	4.75	1.55e-05	0.000555
cell death (GO:0008219)	1079	87	52.76	+	1.65	1.59e-05	0.000568
vascular process in circulatory system (GO:0003018)	245	30	11.98	+	2.5	1.63e-05	0.00058
negative regulation of protein-containing complex assembly (GO:0031333)	138	21	6.75	+	3.11	1.64e-05	0.000581
positive regulation of transporter activity (GO:0032411)	116	19	5.67	+	3.35	1.65e-05	0.000585
cell-cell junction assembly (GO:0007043)	127	20	6.21	+	3.22	1.66e-05	0.000588
regulation of establishment of protein localization (GO:0070201)	592	55	28.95	+	1.9	1.69e-05	0.000597
platelet degranulation (GO:0002576)	128	20	6.26	+	3.2	1.84e-05	0.000648
response to organic cyclic compound (GO:0014070)	886	74	43.32	+	1.71	2.07e-05	0.000726
cellular response to transforming growth factor beta stimulus (GO:0071560)	152	22	7.43	+	2.96	2.08e-05	0.000728
regulation of calcium ion transmembrane transport (GO:1903169)	152	22	7.43	+	2.96	2.08e-05	0.00073
response to lipid (GO:0033993)	822	70	40.19	+	1.74	2.1e-05	0.000731
export from cell (GO:0140352)	996	81	48.7	+	1.66	2.1e-05	0.000731
cellular response to extracellular stimulus (GO:0031668)	269	32	13.15	+	2.43	2.12e-05	0.000735
hemostasis (GO:0007599)	302	34	14.77	+	2.3	2.16e-05	0.000749
platelet activation (GO:0030168)	141	21	6.89	+	3.05	2.18e-05	0.000754
activation of protein kinase activity (GO:0032147)	327	36	15.99	+	2.25	2.25e-05	0.000775
regulation of protein stability (GO:0031647)	303	34	14.82	+	2.29	2.28e-05	0.000785
biological process involved in interaction with host (GO:0051701)	177	24	8.65	+	2.77	2.35e-05	0.000807
regulation of cardiac muscle cell action potential (GO:0098901)	26	9	1.27	+	7.08	2.36e-05	0.000811
response to external stimulus (GO:0009605)	2508	170	122.63	+	1.39	2.4e-05	0.00082
positive regulation of proteolysis (GO:0045862)	370	39	18.09	+	2.16	2.44e-05	0.000834
negative regulation of supramolecular fiber organization (GO:1902904)	154	22	7.53	+	2.92	2.49e-05	0.000849
regulation of cardiac muscle cell contraction (GO:0086004)	34	10	1.66	+	6.02	2.7e-05	0.000919
positive regulation of cell death (GO:0010942)	627	57	30.66	+	1.86	2.71e-05	0.00092
cellular response to nutrient levels (GO:0031669)	240	29	11.73	+	2.47	2.74e-05	0.000927
regulation of sodium ion transport (GO:0002028)	89	16	4.35	+	3.68	2.79e-05	0.000943
neural crest cell development (GO:0014032)	79	15	3.86	+	3.88	2.83e-05	0.000953
protein transport (GO:0015031)	1463	109	71.53	+	1.52	2.88e-05	0.000968
negative regulation of neuron apoptotic process (GO:0043524)	144	21	7.04	+	2.98	2.88e-05	0.000969
negative regulation of actin filament polymerization (GO:0030837)	60	13	2.93	+	4.43	2.91e-05	0.000973
chemotaxis (GO:0006935)	546	51	26.7	+	1.91	2.99e-05	0.001
cognition (GO:0050890)	294	33	14.38	+	2.3	3.02e-05	0.00101
basement membrane organization (GO:0071711)	27	9	1.32	+	6.82	3.02e-05	0.00101
regulation of developmental growth (GO:0048638)	318	35	15.55	+	2.25	3.05e-05	0.00101
cytoskeleton-dependent intracellular transport (GO:0030705)	193	25	9.44	+	2.65	3.18e-05	0.00105
epithelial cell development (GO:0002064)	193	25	9.44	+	2.65	3.18e-05	0.00106
cell communication involved in cardiac conduction (GO:0086065)	43	11	2.1	+	5.23	3.24e-05	0.00107
programmed cell death (GO:0012501)	1044	83	51.05	+	1.63	3.26e-05	0.00107
positive regulation of anion transport (GO:1903793)	502	48	24.55	+	1.96	3.28e-05	0.00108
embryo development ending in birth or egg hatching (GO:0009792)	620	56	30.32	+	1.85	3.7e-05	0.00121
positive regulation of programmed cell death (GO:0043068)	564	52	27.58	+	1.89	3.8e-05	0.00124
regulation of release of sequestered calcium ion into cytosol by sarcoplasmic reticulum (GO:0010880)	28	9	1.37	+	6.57	3.83e-05	0.00125
regulation of cardiac muscle contraction by regulation of the release of sequestered calcium ion (GO:0010881)	21	8	1.03	+	7.79	3.88e-05	0.00126
regulation of muscle cell apoptotic process (GO:0010660)	62	13	3.03	+	4.29	3.91e-05	0.00127
positive regulation of osteoblast differentiation (GO:0045669)	62	13	3.03	+	4.29	3.91e-05	0.00127
cardiac atrium development (GO:0003230)	36	10	1.76	+	5.68	4.08e-05	0.00132
stem cell development (GO:0048864)	82	15	4.01	+	3.74	4.13e-05	0.00134
cell surface receptor signaling pathway involved in cell-cell signaling (GO:1905114)	419	42	20.49	+	2.05	4.32e-05	0.00139
regulation of small GTPase mediated signal transduction (GO:0051056)	327	35	15.99	+	2.19	4.42e-05	0.00142
regulation of body fluid levels (GO:0050878)	494	47	24.15	+	1.95	4.48e-05	0.00144
taxis (GO:0042330)	549	51	26.84	+	1.9	4.54e-05	0.00145
heart valve development (GO:0003170)	63	13	3.08	+	4.22	4.52e-05	0.00145
regulation of actin filament polymerization (GO:0030833)	173	23	8.46	+	2.72	4.54e-05	0.00145
adaptive immune response (GO:0002250)	649	11	31.73	-	0.35	4.63e-05	0.00146
positive regulation of glucose transmembrane transport (GO:0010828)	45	11	2.2	+	5	4.63e-05	0.00147
movement in host environment (GO:0052126)	115	18	5.62	+	3.2	4.65e-05	0.00147
cell-substrate junction organization (GO:0150115)	45	11	2.2	+	5	4.63e-05	0.00147
negative regulation of neuron death (GO:1901215)	205	26	10.02	+	2.59	4.62e-05	0.00147
mesenchymal cell development (GO:0014031)	83	15	4.06	+	3.7	4.67e-05	0.00147
negative regulation of smooth muscle cell proliferation (GO:0048662)	45	11	2.2	+	5	4.63e-05	0.00147
cellular response to chemical stress (GO:0062197)	288	32	14.08	+	2.27	4.7e-05	0.00148
regulation of proteolysis (GO:0030162)	734	63	35.89	+	1.76	4.87e-05	0.00153
regulation of catabolic process (GO:0009894)	1021	81	49.92	+	1.62	4.92e-05	0.00154
forebrain development (GO:0030900)	380	39	18.58	+	2.1	5.04e-05	0.00157
negative regulation of smooth muscle cell migration (GO:0014912)	22	8	1.08	+	7.44	5.07e-05	0.00157
regulation of vascular associated smooth muscle cell migration (GO:1904752)	22	8	1.08	+	7.44	5.07e-05	0.00158
positive regulation of myoblast differentiation (GO:0045663)	22	8	1.08	+	7.44	5.07e-05	0.00158
organic substance metabolic process (GO:0071704)	7878	450	385.2	+	1.17	5.13e-05	0.00159
developmental cell growth (GO:0048588)	84	15	4.11	+	3.65	5.27e-05	0.00163
primary metabolic process (GO:0044238)	7363	424	360.02	+	1.18	5.39e-05	0.00165
regulation of glucose transmembrane transport (GO:0010827)	74	14	3.62	+	3.87	5.37e-05	0.00165
blood coagulation (GO:0007596)	298	33	14.57	+	2.26	5.38e-05	0.00165
response to calcium ion (GO:0051592)	151	21	7.38	+	2.84	5.36e-05	0.00166
negative regulation of intracellular transport (GO:0032387)	55	12	2.69	+	4.46	5.52e-05	0.00169
cellular component maintenance (GO:0043954)	55	12	2.69	+	4.46	5.52e-05	0.00169
response to topologically incorrect protein (GO:0035966)	188	24	9.19	+	2.61	5.6e-05	0.00171
coagulation (GO:0050817)	300	33	14.67	+	2.25	5.68e-05	0.00173
peptide transport (GO:0015833)	1492	109	72.95	+	1.49	5.84e-05	0.00177
endocytosis (GO:0006897)	562	51	27.48	+	1.86	5.96e-05	0.00181
regulation of response to stress (GO:0080134)	1546	112	75.59	+	1.48	6.02e-05	0.00182
regulation of cell morphogenesis involved in differentiation (GO:0010769)	96	16	4.69	+	3.41	6.26e-05	0.00189
substrate adhesion-dependent cell spreading (GO:0034446)	56	12	2.74	+	4.38	6.42e-05	0.00194
regulation of cell junction assembly (GO:1901888)	196	25	9.58	+	2.61	6.48e-05	0.00195
cardiac muscle tissue growth (GO:0055017)	23	8	1.12	+	7.11	6.56e-05	0.00197
response to muscle stretch (GO:0035994)	23	8	1.12	+	7.11	6.56e-05	0.00197
cell growth (GO:0016049)	86	15	4.21	+	3.57	6.68e-05	0.002
regulation of GTPase activity (GO:0043087)	490	46	23.96	+	1.92	6.77e-05	0.00202
amide transport (GO:0042886)	1526	111	74.61	+	1.49	6.86e-05	0.00205
stem cell differentiation (GO:0048863)	154	21	7.53	+	2.79	6.91e-05	0.00206
secretion by cell (GO:0032940)	948	76	46.35	+	1.64	6.98e-05	0.00207
positive regulation of transmembrane receptor protein serine/threonine kinase signaling pathway (GO:0090100)	108	17	5.28	+	3.22	7.04e-05	0.00209
positive regulation of apoptotic process (GO:0043065)	549	50	26.84	+	1.86	7.09e-05	0.0021
positive regulation of calcium ion transmembrane transporter activity (GO:1901021)	39	10	1.91	+	5.24	7.25e-05	0.00214
positive regulation of wound healing (GO:0090303)	57	12	2.79	+	4.31	7.45e-05	0.0022
regulation of ion transmembrane transporter activity (GO:0032412)	268	30	13.1	+	2.29	7.55e-05	0.00222
regulation of osteoblast differentiation (GO:0045667)	120	18	5.87	+	3.07	7.6e-05	0.00223
telencephalon development (GO:0021537)	252	29	12.32	+	2.35	7.6e-05	0.00223
tissue migration (GO:0090130)	98	16	4.79	+	3.34	7.77e-05	0.00227
generation of precursor metabolites and energy (GO:0006091)	402	40	19.66	+	2.04	8.1e-05	0.00237
mesenchymal cell differentiation (GO:0048762)	156	21	7.63	+	2.75	8.16e-05	0.00238
vesicle organization (GO:0016050)	310	33	15.16	+	2.18	8.23e-05	0.00239
cellular chemical homeostasis (GO:0055082)	749	63	36.62	+	1.72	8.27e-05	0.0024
regulation of neurogenesis (GO:0050767)	352	36	17.21	+	2.09	8.29e-05	0.0024
atrioventricular valve morphogenesis (GO:0003181)	24	8	1.17	+	6.82	8.39e-05	0.00242
negative regulation of striated muscle cell apoptotic process (GO:0010664)	24	8	1.17	+	6.82	8.39e-05	0.00242
heart growth (GO:0060419)	24	8	1.17	+	6.82	8.39e-05	0.00243
regulation of substrate adhesion-dependent cell spreading (GO:1900024)	58	12	2.84	+	4.23	8.61e-05	0.00247
entry into host (GO:0044409)	110	17	5.38	+	3.16	8.61e-05	0.00248
vesicle cytoskeletal trafficking (GO:0099518)	68	13	3.32	+	3.91	8.96e-05	0.00257
nitrogen compound transport (GO:0071705)	1801	126	88.06	+	1.43	8.95e-05	0.00257
epithelial cell morphogenesis (GO:0003382)	32	9	1.56	+	5.75	9.12e-05	0.00261
regulation of axonogenesis (GO:0050770)	158	21	7.73	+	2.72	9.59e-05	0.00274
chordate embryonic development (GO:0043009)	601	53	29.39	+	1.8	9.65e-05	0.00275
homotypic cell-cell adhesion (GO:0034109)	59	12	2.88	+	4.16	9.93e-05	0.00282
regulation of binding (GO:0051098)	366	37	17.9	+	2.07	0.000102	0.00289
cell-cell signaling (GO:0007267)	1125	86	55.01	+	1.56	0.000104	0.00296
cardiac septum development (GO:0003279)	101	16	4.94	+	3.24	0.000106	0.00301
regulation of calcium ion transport into cytosol (GO:0010522)	101	16	4.94	+	3.24	0.000106	0.00301
cellular response to starvation (GO:0009267)	192	24	9.39	+	2.56	0.000107	0.00301
platelet formation (GO:0030220)	18	7	0.88	+	7.95	0.000108	0.00302
gliogenesis (GO:0042063)	222	26	10.85	+	2.4	0.000109	0.00306
negative regulation of transferase activity (GO:0051348)	301	32	14.72	+	2.17	0.00011	0.00308
response to extracellular stimulus (GO:0009991)	525	48	25.67	+	1.87	0.000112	0.00312
cellular response to oxidative stress (GO:0034599)	245	28	11.98	+	2.34	0.000112	0.00313
carbohydrate biosynthetic process (GO:0016051)	136	19	6.65	+	2.86	0.000113	0.00316
cytosolic transport (GO:0016482)	148	20	7.24	+	2.76	0.000114	0.00317
dendrite morphogenesis (GO:0048813)	60	12	2.93	+	4.09	0.000114	0.00317
actin filament depolymerization (GO:0030042)	12	6	0.59	+	10.23	0.000116	0.00321
viral entry into host cell (GO:0046718)	102	16	4.99	+	3.21	0.000118	0.00326
ion transport (GO:0006811)	2881	186	140.87	+	1.32	0.00012	0.00333
regulation of striated muscle cell differentiation (GO:0051153)	81	14	3.96	+	3.53	0.000126	0.00348
fatty acid transport (GO:0015908)	114	17	5.57	+	3.05	0.000127	0.00349
regulation of canonical Wnt signaling pathway (GO:0060828)	288	31	14.08	+	2.2	0.000128	0.00351
protein-DNA complex assembly (GO:0065004)	254	1	12.42	-	0.08	0.000129	0.00355
nitrogen compound metabolic process (GO:0006807)	6897	397	337.23	+	1.18	0.00013	0.00356
positive regulation of anion transmembrane transport (GO:1903961)	61	12	2.98	+	4.02	0.000131	0.00358
in utero embryonic development (GO:0001701)	355	36	17.36	+	2.07	0.000133	0.00362
regulation of nervous system development (GO:0051960)	428	41	20.93	+	1.96	0.000133	0.00362
atrioventricular valve development (GO:0003171)	26	8	1.27	+	6.29	0.000133	0.00362
membrane assembly (GO:0071709)	34	9	1.66	+	5.41	0.000135	0.00367
ion homeostasis (GO:0050801)	764	63	37.36	+	1.69	0.000137	0.00371
glucose metabolic process (GO:0006006)	115	17	5.62	+	3.02	0.000139	0.00377
response to starvation (GO:0042594)	233	27	11.39	+	2.37	0.000141	0.00381
cardiac right ventricle morphogenesis (GO:0003215)	19	7	0.93	+	7.53	0.000141	0.00381
platelet morphogenesis (GO:0036344)	19	7	0.93	+	7.53	0.000141	0.00381
regulation of myoblast differentiation (GO:0045661)	52	11	2.54	+	4.33	0.000142	0.00382
negative regulation of canonical Wnt signaling pathway (GO:0090090)	182	23	8.9	+	2.58	0.000145	0.00388
endocardial cushion development (GO:0003197)	43	10	2.1	+	4.76	0.000145	0.00389
regulation of protein localization to membrane (GO:1905475)	199	24	9.73	+	2.47	0.000147	0.00392
positive regulation of catabolic process (GO:0009896)	460	43	22.49	+	1.91	0.000147	0.00393
regulation of transporter activity (GO:0032409)	292	31	14.28	+	2.17	0.000148	0.00394
positive regulation of protein catabolic process (GO:0045732)	235	27	11.49	+	2.35	0.000149	0.00397
endothelial cell differentiation (GO:0045446)	83	14	4.06	+	3.45	0.000158	0.0042
positive regulation of cell development (GO:0010720)	294	31	14.38	+	2.16	0.00016	0.00424
positive regulation of sodium ion transport (GO:0010765)	35	9	1.71	+	5.26	0.000163	0.0043
axon extension (GO:0048675)	35	9	1.71	+	5.26	0.000163	0.00431
acidic amino acid transport (GO:0015800)	53	11	2.59	+	4.24	0.000164	0.00432
secretion (GO:0046903)	1061	81	51.88	+	1.56	0.000164	0.00432
cellular response to nerve growth factor stimulus (GO:1990090)	53	11	2.59	+	4.24	0.000164	0.00432
endothelial cell development (GO:0001885)	53	11	2.59	+	4.24	0.000164	0.00433
positive regulation of calcium ion transmembrane transport (GO:1904427)	73	13	3.57	+	3.64	0.000168	0.00439
multicellular organismal movement (GO:0050879)	44	10	2.15	+	4.65	0.000171	0.00445
organelle localization (GO:0051640)	616	53	30.12	+	1.76	0.000171	0.00446
musculoskeletal movement (GO:0050881)	44	10	2.15	+	4.65	0.000171	0.00446
gluconeogenesis (GO:0006094)	44	10	2.15	+	4.65	0.000171	0.00446
cell-substrate junction assembly (GO:0007044)	44	10	2.15	+	4.65	0.000171	0.00447
regulation of transmembrane transporter activity (GO:0022898)	279	30	13.64	+	2.2	0.000174	0.00451
cardiac conduction (GO:0061337)	95	15	4.65	+	3.23	0.000179	0.00463
negative regulation of vascular associated smooth muscle cell proliferation (GO:1904706)	20	7	0.98	+	7.16	0.000183	0.00473
negative regulation of protein transport (GO:0051224)	118	17	5.77	+	2.95	0.000184	0.00475
negative regulation of protein polymerization (GO:0032272)	74	13	3.62	+	3.59	0.000189	0.00487
negative regulation of lipid localization (GO:1905953)	54	11	2.64	+	4.17	0.00019	0.00488
cell activation (GO:0001775)	1084	82	53	+	1.55	0.000192	0.00492
regulation of receptor-mediated endocytosis (GO:0048259)	107	16	5.23	+	3.06	0.000193	0.00495
negative regulation of muscle cell apoptotic process (GO:0010656)	36	9	1.76	+	5.11	0.000195	0.005
insulin receptor signaling pathway (GO:0008286)	85	14	4.16	+	3.37	0.000197	0.00504
modulation of chemical synaptic transmission (GO:0050804)	424	40	20.73	+	1.93	0.000198	0.00506
regulation of protein catabolic process (GO:0042176)	397	38	19.41	+	1.96	0.000201	0.00513
skeletal myofibril assembly (GO:0014866)	8	5	0.39	+	12.78	0.000205	0.00516
regulation of trans-synaptic signaling (GO:0099177)	425	40	20.78	+	1.92	0.000203	0.00517
cardiac muscle fiber development (GO:0048739)	8	5	0.39	+	12.78	0.000205	0.00517
negative regulation of cell cycle (GO:0045786)	569	50	27.82	+	1.8	0.000204	0.00518
axon extension involved in axon guidance (GO:0048846)	8	5	0.39	+	12.78	0.000205	0.00518
hippo signaling (GO:0035329)	28	8	1.37	+	5.84	0.000205	0.00519
neuron projection extension involved in neuron projection guidance (GO:1902284)	8	5	0.39	+	12.78	0.000205	0.00519
endoderm development (GO:0007492)	75	13	3.67	+	3.54	0.000212	0.00533
DNA metabolic process (GO:0006259)	781	17	38.19	-	0.45	0.000212	0.00533
synapse organization (GO:0050808)	285	30	13.94	+	2.15	0.000215	0.00538
response to nerve growth factor (GO:1990089)	55	11	2.69	+	4.09	0.000218	0.00546
regulation of cellular catabolic process (GO:0031329)	855	68	41.81	+	1.63	0.000219	0.00547
regulation of actomyosin structure organization (GO:0110020)	97	15	4.74	+	3.16	0.000219	0.00547
ribonucleoside diphosphate metabolic process (GO:0009185)	65	12	3.18	+	3.78	0.000221	0.0055
relaxation of cardiac muscle (GO:0055119)	14	6	0.68	+	8.77	0.000223	0.00554
negative regulation of cell development (GO:0010721)	176	22	8.61	+	2.56	0.000223	0.00555
organelle assembly (GO:0070925)	781	63	38.19	+	1.65	0.000228	0.00564
positive regulation of neuron projection development (GO:0010976)	157	20	7.68	+	2.61	0.000232	0.00575
negative regulation of lipid transport (GO:0032369)	37	9	1.81	+	4.97	0.000233	0.00575
negative regulation of cardiac muscle cell apoptotic process (GO:0010667)	21	7	1.03	+	6.82	0.000234	0.00578
cellular response to stress (GO:0033554)	1755	121	85.81	+	1.41	0.000235	0.00579
calcium-mediated signaling (GO:0019722)	145	19	7.09	+	2.68	0.000239	0.00586
ribonucleoprotein complex biogenesis (GO:0022613)	465	7	22.74	-	0.31	0.000238	0.00587
response to carbohydrate (GO:0009743)	178	22	8.7	+	2.53	0.000239	0.00587
regulation of NIK/NF-kappaB signaling (GO:1901222)	98	15	4.79	+	3.13	0.000242	0.00592
cardiac atrium morphogenesis (GO:0003209)	29	8	1.42	+	5.64	0.00025	0.0061
regulation of actin filament depolymerization (GO:0030834)	56	11	2.74	+	4.02	0.00025	0.00611
regulation of protein polymerization (GO:0032271)	232	26	11.34	+	2.29	0.000251	0.00611
positive regulation of cell-matrix adhesion (GO:0001954)	56	11	2.74	+	4.02	0.00025	0.00612
endosomal transport (GO:0016197)	233	26	11.39	+	2.28	0.000261	0.00634
negative regulation of establishment of protein localization (GO:1904950)	122	17	5.97	+	2.85	0.000262	0.00636
regulation of endothelial cell proliferation (GO:0001936)	134	18	6.55	+	2.75	0.000262	0.00636
neuron recognition (GO:0008038)	47	10	2.3	+	4.35	0.000272	0.00655
establishment of protein localization to plasma membrane (GO:0061951)	47	10	2.3	+	4.35	0.000272	0.00656
hexose biosynthetic process (GO:0019319)	47	10	2.3	+	4.35	0.000272	0.00657
regulated exocytosis (GO:0045055)	693	57	33.88	+	1.68	0.000279	0.00672
positive regulation of cellular catabolic process (GO:0031331)	390	37	19.07	+	1.94	0.000284	0.00682
regulation of lipid biosynthetic process (GO:0046890)	197	23	9.63	+	2.39	0.000287	0.00688
transmembrane receptor protein serine/threonine kinase signaling pathway (GO:0007178)	197	23	9.63	+	2.39	0.000287	0.0069
cell communication by electrical coupling involved in cardiac conduction (GO:0086064)	15	6	0.73	+	8.18	0.0003	0.00718
regulation of protein depolymerization (GO:1901879)	89	14	4.35	+	3.22	0.000301	0.00719
nucleic acid metabolic process (GO:0090304)	2232	74	109.13	-	0.68	0.000302	0.0072
positive regulation of cellular protein localization (GO:1903829)	301	31	14.72	+	2.11	0.000303	0.00721
response to reactive oxygen species (GO:0000302)	198	23	9.68	+	2.38	0.000304	0.00723
modulation of age-related behavioral decline (GO:0090647)	9	5	0.44	+	11.36	0.000307	0.00728
regulation of protein kinase B signaling (GO:0051896)	237	26	11.59	+	2.24	0.000308	0.00731
positive regulation of cation transmembrane transport (GO:1904064)	167	21	8.17	+	2.57	0.000314	0.00742
response to unfolded protein (GO:0006986)	167	21	8.17	+	2.57	0.000314	0.00744
positive regulation of response to wounding (GO:1903036)	68	12	3.32	+	3.61	0.000318	0.00751
exocytosis (GO:0006887)	785	63	38.38	+	1.64	0.00032	0.00754
regulation of protein binding (GO:0043393)	199	23	9.73	+	2.36	0.000321	0.00756
cellular response to decreased oxygen levels (GO:0036294)	199	23	9.73	+	2.36	0.000321	0.00757
regulation of release of sequestered calcium ion into cytosol (GO:0051279)	79	13	3.86	+	3.37	0.000332	0.0078
regulation of protein localization to cell periphery (GO:1904375)	125	17	6.11	+	2.78	0.000338	0.00792
anion transport (GO:0006820)	2287	150	111.82	+	1.34	0.000346	0.00809
inorganic ion homeostasis (GO:0098771)	716	58	35.01	+	1.66	0.00035	0.00817
regulation of BMP signaling pathway (GO:0030510)	102	15	4.99	+	3.01	0.000355	0.00827
transforming growth factor beta receptor signaling pathway (GO:0007179)	102	15	4.99	+	3.01	0.000355	0.00828
outflow tract morphogenesis (GO:0003151)	69	12	3.37	+	3.56	0.000358	0.00831
axo-dendritic transport (GO:0008088)	69	12	3.37	+	3.56	0.000358	0.00833
response to glucose (GO:0009749)	138	18	6.75	+	2.67	0.000362	0.00839
cardiac muscle cell action potential (GO:0086001)	49	10	2.4	+	4.17	0.000363	0.00841
ADP metabolic process (GO:0046031)	49	10	2.4	+	4.17	0.000363	0.00842
regulation of blood vessel endothelial cell migration (GO:0043535)	91	14	4.45	+	3.15	0.000368	0.00847
regulation of tube diameter (GO:0035296)	126	17	6.16	+	2.76	0.000367	0.00847
blood vessel diameter maintenance (GO:0097746)	126	17	6.16	+	2.76	0.000367	0.00849
atrial septum development (GO:0003283)	23	7	1.12	+	6.22	0.000371	0.00853
negative regulation of organic acid transport (GO:0032891)	23	7	1.12	+	6.22	0.000371	0.00854
response to nutrient levels (GO:0031667)	495	44	24.2	+	1.82	0.000374	0.00857
organic substance transport (GO:0071702)	2170	143	106.1	+	1.35	0.00038	0.00869
membrane biogenesis (GO:0044091)	40	9	1.96	+	4.6	0.000383	0.00875
positive regulation of cardiocyte differentiation (GO:1905209)	16	6	0.78	+	7.67	0.000396	0.00902
negative regulation of fatty acid transport (GO:2000192)	16	6	0.78	+	7.67	0.000396	0.00903
regulation of cardiac muscle cell differentiation (GO:2000725)	16	6	0.78	+	7.67	0.000396	0.00905
regulation of tube size (GO:0035150)	127	17	6.21	+	2.74	0.000399	0.00905
energy derivation by oxidation of organic compounds (GO:0015980)	227	25	11.1	+	2.25	0.000399	0.00907
negative regulation of epithelial cell migration (GO:0010633)	70	12	3.42	+	3.51	0.000402	0.00909
ERBB signaling pathway (GO:0038127)	70	12	3.42	+	3.51	0.000402	0.00911
negative regulation of cytoskeleton organization (GO:0051494)	152	19	7.43	+	2.56	0.000407	0.00919
regulation of G1/S transition of mitotic cell cycle (GO:2000045)	152	19	7.43	+	2.56	0.000407	0.0092
positive regulation of GTPase activity (GO:0043547)	413	38	20.19	+	1.88	0.000417	0.00939
regulation of protein localization to plasma membrane (GO:1903076)	104	15	5.09	+	2.95	0.000427	0.0096
regulation of Wnt signaling pathway (GO:0030111)	366	35	17.9	+	1.96	0.000431	0.00969
negative regulation of cellular protein localization (GO:1903828)	116	16	5.67	+	2.82	0.000435	0.00975
muscle adaptation (GO:0043500)	32	8	1.56	+	5.11	0.000441	0.00986
dendritic spine maintenance (GO:0097062)	10	5	0.49	+	10.23	0.000442	0.00987
skeletal muscle contraction (GO:0003009)	32	8	1.56	+	5.11	0.000441	0.00987
nucleoside diphosphate biosynthetic process (GO:0009133)	10	5	0.49	+	10.23	0.000442	0.00988
Ras protein signal transduction (GO:0007265)	176	21	8.61	+	2.44	0.000444	0.0099
regulation of transforming growth factor beta production (GO:0071634)	41	9	2	+	4.49	0.000448	0.00996
regulation of muscle adaptation (GO:0043502)	82	13	4.01	+	3.24	0.000457	0.0102
negative regulation of Wnt signaling pathway (GO:0030178)	214	24	10.46	+	2.29	0.000472	0.0105
neuron death (GO:0070997)	61	11	2.98	+	3.69	0.000476	0.0105
negative regulation of peptidyl-cysteine S-nitrosylation (GO:1902083)	5	4	0.24	+	16.36	0.00049	0.0108
protein dephosphorylation (GO:0006470)	216	24	10.56	+	2.27	0.000504	0.0111
peptidyl-threonine modification (GO:0018210)	83	13	4.06	+	3.2	0.000506	0.0112
peptidyl-tyrosine dephosphorylation (GO:0035335)	106	15	5.18	+	2.89	0.000511	0.0112
response to glucocorticoid (GO:0051384)	143	18	6.99	+	2.57	0.000531	0.0117
cellular carbohydrate biosynthetic process (GO:0034637)	62	11	3.03	+	3.63	0.000537	0.0117
purine nucleoside diphosphate metabolic process (GO:0009135)	62	11	3.03	+	3.63	0.000537	0.0117
purine ribonucleoside diphosphate metabolic process (GO:0009179)	62	11	3.03	+	3.63	0.000537	0.0118
regulation of lipid metabolic process (GO:0019216)	403	37	19.7	+	1.88	0.000535	0.0118
positive regulation of epithelial cell proliferation (GO:0050679)	194	22	9.49	+	2.32	0.000536	0.0118
positive regulation of protein localization to plasma membrane (GO:1903078)	62	11	3.03	+	3.63	0.000537	0.0118
epithelial tube morphogenesis (GO:0060562)	302	30	14.77	+	2.03	0.000541	0.0118
second-messenger-mediated signaling (GO:0019932)	218	24	10.66	+	2.25	0.000542	0.0118
monosaccharide metabolic process (GO:0005996)	180	21	8.8	+	2.39	0.000544	0.0118
organ growth (GO:0035265)	73	12	3.57	+	3.36	0.000562	0.0122
positive regulation of muscle cell differentiation (GO:0051149)	73	12	3.57	+	3.36	0.000562	0.0122
response to hexose (GO:0009746)	144	18	7.04	+	2.56	0.000572	0.0124
positive regulation of protein kinase B signaling (GO:0051897)	181	21	8.85	+	2.37	0.000573	0.0124
endothelium development (GO:0003158)	96	14	4.69	+	2.98	0.000594	0.0128
small GTPase mediated signal transduction (GO:0007264)	262	27	12.81	+	2.11	0.000605	0.013
artery morphogenesis (GO:0048844)	63	11	3.08	+	3.57	0.000605	0.013
cardiac chamber formation (GO:0003207)	11	5	0.54	+	9.3	0.000619	0.0133
peptidyl-threonine phosphorylation (GO:0018107)	74	12	3.62	+	3.32	0.000625	0.0133
monosaccharide biosynthetic process (GO:0046364)	53	10	2.59	+	3.86	0.000625	0.0133
tricarboxylic acid cycle (GO:0006099)	34	8	1.66	+	4.81	0.000623	0.0133
regulation of vascular associated smooth muscle cell proliferation (GO:1904705)	53	10	2.59	+	3.86	0.000625	0.0134
heterotypic cell-cell adhesion (GO:0034113)	34	8	1.66	+	4.81	0.000623	0.0134
neural crest cell migration (GO:0001755)	53	10	2.59	+	3.86	0.000625	0.0134
secondary alcohol metabolic process (GO:1902652)	133	17	6.5	+	2.61	0.000641	0.0136
pallium development (GO:0021543)	169	20	8.26	+	2.42	0.000664	0.0141
negative regulation of growth (GO:0045926)	246	26	12.03	+	2.16	0.000663	0.0141
protein catabolic process (GO:0030163)	683	55	33.4	+	1.65	0.000672	0.0142
regulation of ERK1 and ERK2 cascade (GO:0070372)	291	29	14.23	+	2.04	0.000682	0.0144
outflow tract septum morphogenesis (GO:0003148)	26	7	1.27	+	5.51	0.00069	0.0146
cellular ion homeostasis (GO:0006873)	650	53	31.78	+	1.67	0.000694	0.0147
labyrinthine layer development (GO:0060711)	44	9	2.15	+	4.18	0.000699	0.0147
platelet aggregation (GO:0070527)	44	9	2.15	+	4.18	0.000699	0.0147
regulation of endocytosis (GO:0030100)	208	23	10.17	+	2.26	0.000714	0.015
platelet-derived growth factor receptor signaling pathway (GO:0048008)	35	8	1.71	+	4.67	0.000734	0.0154
glial cell differentiation (GO:0010001)	171	20	8.36	+	2.39	0.000733	0.0154
positive regulation of protein-containing complex disassembly (GO:0043243)	35	8	1.71	+	4.67	0.000734	0.0154
protein-DNA complex subunit organization (GO:0071824)	294	3	14.38	-	0.21	0.000749	0.0157
regulation of calcium ion transmembrane transporter activity (GO:1901019)	87	13	4.25	+	3.06	0.000752	0.0157
establishment of organelle localization (GO:0051656)	397	36	19.41	+	1.85	0.000762	0.0159
transport along microtubule (GO:0010970)	156	19	7.63	+	2.49	0.000771	0.016
cellular calcium ion homeostasis (GO:0006874)	427	38	20.88	+	1.82	0.000773	0.016
hexose metabolic process (GO:0019318)	156	19	7.63	+	2.49	0.000771	0.0161
regulation of cell cycle G1/S phase transition (GO:1902806)	172	20	8.41	+	2.38	0.000771	0.0161
purine nucleoside diphosphate biosynthetic process (GO:0009136)	6	4	0.29	+	13.63	0.000786	0.0162
ribonucleoside diphosphate biosynthetic process (GO:0009188)	6	4	0.29	+	13.63	0.000786	0.0162
negative regulation of vascular associated smooth muscle cell migration (GO:1904753)	6	4	0.29	+	13.63	0.000786	0.0162
negative regulation of cellular response to growth factor stimulus (GO:0090288)	111	15	5.43	+	2.76	0.000784	0.0162
neural crest cell migration involved in autonomic nervous system development (GO:1901166)	6	4	0.29	+	13.63	0.000786	0.0163
formation of primary germ layer (GO:0001704)	111	15	5.43	+	2.76	0.000784	0.0163
cation homeostasis (GO:0055080)	705	56	34.47	+	1.62	0.00081	0.0167
metal ion transport (GO:0030001)	324	31	15.84	+	1.96	0.000823	0.0169
epithelial cell migration (GO:0010631)	88	13	4.3	+	3.02	0.000827	0.017
vesicle transport along actin filament (GO:0030050)	19	6	0.93	+	6.46	0.000834	0.017
positive regulation of protein depolymerization (GO:1901881)	19	6	0.93	+	6.46	0.000834	0.017
regulation of protein-containing complex disassembly (GO:0043244)	124	16	6.06	+	2.64	0.000834	0.017
striated muscle adaptation (GO:0014888)	27	7	1.32	+	5.3	0.000834	0.0171
regulation of ryanodine-sensitive calcium-release channel activity (GO:0060314)	27	7	1.32	+	5.3	0.000834	0.0171
fibroblast migration (GO:0010761)	12	5	0.59	+	8.52	0.000843	0.0172
positive regulation of nucleobase-containing compound metabolic process (GO:0045935)	1891	125	92.46	+	1.35	0.00086	0.0175
negative regulation of neurogenesis (GO:0050768)	137	17	6.7	+	2.54	0.000865	0.0176
calcium ion homeostasis (GO:0055074)	440	39	21.51	+	1.81	0.000881	0.0179
regulation of stress fiber assembly (GO:0051492)	89	13	4.35	+	2.99	0.000908	0.0184
sterol biosynthetic process (GO:0016126)	46	9	2.25	+	4	0.000923	0.0186
ribosome biogenesis (GO:0042254)	332	4	16.23	-	0.25	0.000922	0.0187
mitotic anaphase (GO:0000090)	157	0	7.68	-	< 0.01	0.000932	0.0188
anaphase (GO:0051322)	157	0	7.68	-	< 0.01	0.000932	0.0188
regulation of metal ion transport (GO:0010959)	257	26	12.57	+	2.07	0.000942	0.0189
regeneration (GO:0031099)	161	19	7.87	+	2.41	0.000948	0.019
positive regulation of RNA metabolic process (GO:0051254)	1718	115	84	+	1.37	0.000947	0.019
positive regulation of binding (GO:0051099)	176	20	8.61	+	2.32	0.000952	0.0191
regulation of Ras protein signal transduction (GO:0046578)	198	22	9.68	+	2.27	0.000956	0.0191
mitotic M phase (GO:0000087)	160	0	7.82	-	< 0.01	0.00096	0.0192
M phase (GO:0000279)	160	0	7.82	-	< 0.01	0.00096	0.0192
cellular response to oxygen levels (GO:0071453)	216	23	10.56	+	2.18	0.000973	0.0194
regulation of phosphatidylinositol 3-kinase signaling (GO:0014066)	126	16	6.16	+	2.6	0.000973	0.0194
regulation of intracellular protein transport (GO:0033157)	258	26	12.62	+	2.06	0.000979	0.0195
regulation of cell growth (GO:0001558)	417	37	20.39	+	1.81	0.000991	0.0197
positive regulation of cellular response to transforming growth factor beta stimulus (GO:1903846)	28	7	1.37	+	5.11	0.001	0.0198
positive regulation of transforming growth factor beta receptor signaling pathway (GO:0030511)	28	7	1.37	+	5.11	0.001	0.0199
hematopoietic or lymphoid organ development (GO:0048534)	619	50	30.27	+	1.65	0.00103	0.0205
organelle transport along microtubule (GO:0072384)	79	12	3.86	+	3.11	0.00104	0.0206
cell communication by electrical coupling (GO:0010644)	20	6	0.98	+	6.14	0.00104	0.0206
establishment of vesicle localization (GO:0051650)	201	22	9.83	+	2.24	0.00105	0.0206
polysaccharide biosynthetic process (GO:0000271)	47	9	2.3	+	3.92	0.00105	0.0207
cellular polysaccharide biosynthetic process (GO:0033692)	47	9	2.3	+	3.92	0.00105	0.0208
peptidyl-tyrosine phosphorylation (GO:0018108)	147	18	7.19	+	2.5	0.00108	0.0212
metal ion homeostasis (GO:0055065)	622	50	30.41	+	1.64	0.00108	0.0212
ncRNA metabolic process (GO:0034660)	517	10	25.28	-	0.4	0.00108	0.0212
positive regulation of stress-activated MAPK cascade (GO:0032874)	115	15	5.62	+	2.67	0.00108	0.0212
sensory organ development (GO:0007423)	555	46	27.14	+	1.7	0.00109	0.0213
epithelium migration (GO:0090132)	91	13	4.45	+	2.92	0.00109	0.0213
positive regulation of endocytosis (GO:0045807)	103	14	5.04	+	2.78	0.0011	0.0214
negative regulation of developmental growth (GO:0048640)	103	14	5.04	+	2.78	0.0011	0.0215
insulin-like growth factor receptor signaling pathway (GO:0048009)	13	5	0.64	+	7.87	0.00112	0.0218
positive regulation of actin filament depolymerization (GO:0030836)	13	5	0.64	+	7.87	0.00112	0.0218
dicarboxylic acid biosynthetic process (GO:0043650)	13	5	0.64	+	7.87	0.00112	0.0218
positive regulation of protein serine/threonine kinase activity (GO:0071902)	316	30	15.45	+	1.94	0.00113	0.0218
positive regulation of extrinsic apoptotic signaling pathway via death domain receptors (GO:1902043)	13	5	0.64	+	7.87	0.00112	0.0218
cellular response to topologically incorrect protein (GO:0035967)	149	18	7.29	+	2.47	0.00115	0.0222
cortical cytoskeleton organization (GO:0030865)	58	10	2.84	+	3.53	0.00115	0.0222
axonal transport (GO:0098930)	58	10	2.84	+	3.53	0.00115	0.0222
dicarboxylic acid transport (GO:0006835)	80	12	3.91	+	3.07	0.00115	0.0222
sprouting angiogenesis (GO:0002040)	58	10	2.84	+	3.53	0.00115	0.0223
cellular divalent inorganic cation homeostasis (GO:0072503)	462	40	22.59	+	1.77	0.00116	0.0224
positive regulation of protein localization to cell periphery (GO:1904377)	69	11	3.37	+	3.26	0.00118	0.0226
placenta blood vessel development (GO:0060674)	29	7	1.42	+	4.94	0.00119	0.0226
positive regulation of cell population proliferation (GO:0008284)	932	69	45.57	+	1.51	0.0012	0.0226
response to monosaccharide (GO:0034284)	150	18	7.33	+	2.45	0.0012	0.0226
protein localization to Golgi apparatus (GO:0034067)	29	7	1.42	+	4.94	0.00119	0.0227
negative regulation of cell projection organization (GO:0031345)	180	20	8.8	+	2.27	0.00118	0.0227
peptidyl-tyrosine modification (GO:0018212)	150	18	7.33	+	2.45	0.0012	0.0227
positive regulation of epithelial to mesenchymal transition (GO:0010718)	48	9	2.35	+	3.83	0.0012	0.0227
negative regulation of cyclin-dependent protein serine/threonine kinase activity (GO:0045736)	29	7	1.42	+	4.94	0.00119	0.0227
cellular cation homeostasis (GO:0030003)	636	51	31.1	+	1.64	0.00118	0.0227
regulation of epithelial to mesenchymal transition (GO:0010717)	92	13	4.5	+	2.89	0.00119	0.0227
embryonic morphogenesis (GO:0048598)	561	46	27.43	+	1.68	0.00119	0.0227
positive regulation of endothelial cell proliferation (GO:0001938)	92	13	4.5	+	2.89	0.00119	0.0227
transition between fast and slow fiber (GO:0014883)	7	4	0.34	+	11.69	0.00119	0.0227
regulation of cardiac muscle cell membrane potential (GO:0086036)	7	4	0.34	+	11.69	0.00119	0.0228
regulation of calcium ion transport (GO:0051924)	247	25	12.08	+	2.07	0.00122	0.0229
macromolecule metabolic process (GO:0043170)	6193	352	302.81	+	1.16	0.00122	0.023
epithelial cell differentiation (GO:0030855)	674	53	32.96	+	1.61	0.00122	0.023
positive regulation of cellular biosynthetic process (GO:0031328)	1956	128	95.64	+	1.34	0.00123	0.023
ATP metabolic process (GO:0046034)	206	22	10.07	+	2.18	0.00126	0.0236
regulation of ATPase activity (GO:0043462)	81	12	3.96	+	3.03	0.00127	0.0237
positive regulation of stress-activated protein kinase signaling cascade (GO:0070304)	117	15	5.72	+	2.62	0.00127	0.0237
actin filament-based transport (GO:0099515)	21	6	1.03	+	5.84	0.00129	0.024
positive regulation of sodium ion transmembrane transport (GO:1902307)	21	6	1.03	+	5.84	0.00129	0.024
regulation of endothelial cell chemotaxis (GO:2001026)	21	6	1.03	+	5.84	0.00129	0.024
positive regulation of RNA biosynthetic process (GO:1902680)	1623	109	79.36	+	1.37	0.00129	0.024
positive regulation of transcription, DNA-templated (GO:0045893)	1622	109	79.31	+	1.37	0.00129	0.024
positive regulation of nucleic acid-templated transcription (GO:1903508)	1622	109	79.31	+	1.37	0.00129	0.0241
receptor metabolic process (GO:0043112)	105	14	5.13	+	2.73	0.0013	0.0241
positive regulation of protein localization to membrane (GO:1905477)	130	16	6.36	+	2.52	0.00131	0.0243
response to epidermal growth factor (GO:0070849)	49	9	2.4	+	3.76	0.00136	0.0252
endoderm formation (GO:0001706)	49	9	2.4	+	3.76	0.00136	0.0252
mesenchyme morphogenesis (GO:0072132)	49	9	2.4	+	3.76	0.00136	0.0253
reproductive system development (GO:0061458)	411	36	20.1	+	1.79	0.00139	0.0256
myelination (GO:0042552)	106	14	5.18	+	2.7	0.00141	0.026
negative regulation of cyclin-dependent protein kinase activity (GO:1904030)	30	7	1.47	+	4.77	0.00141	0.026
Golgi to plasma membrane protein transport (GO:0043001)	30	7	1.47	+	4.77	0.00141	0.026
carboxylic acid biosynthetic process (GO:0046394)	278	27	13.59	+	1.99	0.00142	0.0261
regulation of ERBB signaling pathway (GO:1901184)	94	13	4.6	+	2.83	0.00142	0.0261
regulation of autophagy (GO:0010506)	331	31	16.18	+	1.92	0.00143	0.0262
actin polymerization or depolymerization (GO:0008154)	60	10	2.93	+	3.41	0.00145	0.0264
vasculogenesis (GO:0001570)	71	11	3.47	+	3.17	0.00145	0.0265
chromosome organization (GO:0051276)	1061	30	51.88	-	0.58	0.00146	0.0267
positive regulation of fibroblast migration (GO:0010763)	14	5	0.68	+	7.3	0.00147	0.0267
negative regulation of cell morphogenesis involved in differentiation (GO:0010771)	14	5	0.68	+	7.3	0.00147	0.0267
negative regulation of substrate adhesion-dependent cell spreading (GO:1900025)	14	5	0.68	+	7.3	0.00147	0.0267
regulation of sequestering of calcium ion (GO:0051282)	119	15	5.82	+	2.58	0.00148	0.0268
divalent inorganic cation homeostasis (GO:0072507)	483	41	23.62	+	1.74	0.00148	0.0269
peptidyl-amino acid modification (GO:0018193)	875	65	42.78	+	1.52	0.00149	0.027
carboxylic acid metabolic process (GO:0019752)	828	62	40.49	+	1.53	0.0015	0.0272
regulation of peptidase activity (GO:0052547)	452	39	22.1	+	1.76	0.00151	0.0273
positive regulation of axonogenesis (GO:0050772)	83	12	4.06	+	2.96	0.00153	0.0275
negative regulation of G1/S transition of mitotic cell cycle (GO:2000134)	107	14	5.23	+	2.68	0.00153	0.0275
response to estradiol (GO:0032355)	138	17	6.75	+	2.52	0.00153	0.0276
positive regulation of ossification (GO:0045778)	50	9	2.44	+	3.68	0.00154	0.0278
positive regulation of neuron death (GO:1901216)	95	13	4.65	+	2.8	0.00155	0.0278
endodermal cell differentiation (GO:0035987)	40	8	1.96	+	4.09	0.00156	0.0279
cholesterol biosynthetic process (GO:0006695)	40	8	1.96	+	4.09	0.00156	0.0279
vesicle localization (GO:0051648)	211	22	10.32	+	2.13	0.00155	0.0279
secondary alcohol biosynthetic process (GO:1902653)	40	8	1.96	+	4.09	0.00156	0.0279
glucan biosynthetic process (GO:0009250)	22	6	1.08	+	5.58	0.00158	0.0281
relaxation of muscle (GO:0090075)	22	6	1.08	+	5.58	0.00158	0.0281
glycogen biosynthetic process (GO:0005978)	22	6	1.08	+	5.58	0.00158	0.0282
regulation of MAP kinase activity (GO:0043405)	309	29	15.11	+	1.92	0.00158	0.0282
negative regulation of ERK1 and ERK2 cascade (GO:0070373)	72	11	3.52	+	3.12	0.0016	0.0284
ossification (GO:0001503)	262	26	12.81	+	2.03	0.00162	0.0286
neuron projection extension (GO:1990138)	61	10	2.98	+	3.35	0.00161	0.0287
positive regulation of biosynthetic process (GO:0009891)	1990	129	97.3	+	1.33	0.00161	0.0287
negative regulation of transmembrane receptor protein serine/threonine kinase signaling pathway (GO:0090101)	140	17	6.85	+	2.48	0.00161	0.0287
protein stabilization (GO:0050821)	196	21	9.58	+	2.19	0.00164	0.0291
axon ensheathment (GO:0008366)	108	14	5.28	+	2.65	0.00165	0.0292
ensheathment of neurons (GO:0007272)	108	14	5.28	+	2.65	0.00165	0.0292
nucleoside diphosphate metabolic process (GO:0009132)	84	12	4.11	+	2.92	0.00167	0.0295
vesicle-mediated transport to the plasma membrane (GO:0098876)	84	12	4.11	+	2.92	0.00167	0.0295
regulation of axon extension (GO:0030516)	96	13	4.69	+	2.77	0.00168	0.0296
positive regulation of macromolecule biosynthetic process (GO:0010557)	1853	121	90.6	+	1.34	0.00168	0.0296
cell growth involved in cardiac muscle cell development (GO:0061049)	8	4	0.39	+	10.23	0.00172	0.03
regulation of secondary heart field cardioblast proliferation (GO:0003266)	8	4	0.39	+	10.23	0.00172	0.03
physiological muscle hypertrophy (GO:0003298)	8	4	0.39	+	10.23	0.00172	0.03
negative regulation of nervous system development (GO:0051961)	142	17	6.94	+	2.45	0.00173	0.0301
physiological cardiac muscle hypertrophy (GO:0003301)	8	4	0.39	+	10.23	0.00172	0.0301
regulation of wound healing, spreading of epidermal cells (GO:1903689)	8	4	0.39	+	10.23	0.00172	0.0301
regulation of peptidyl-cysteine S-nitrosylation (GO:2000169)	8	4	0.39	+	10.23	0.00172	0.0301
regulation of cardioblast differentiation (GO:0051890)	8	4	0.39	+	10.23	0.00172	0.0302
positive regulation of cell migration by vascular endothelial growth factor signaling pathway (GO:0038089)	8	4	0.39	+	10.23	0.00172	0.0302
regulation of action potential (GO:0098900)	51	9	2.49	+	3.61	0.00174	0.0303
cellular component disassembly (GO:0022411)	400	35	19.56	+	1.79	0.00174	0.0303
neuron apoptotic process (GO:0051402)	51	9	2.49	+	3.61	0.00174	0.0303
semi-lunar valve development (GO:1905314)	41	8	2	+	3.99	0.00178	0.0308
positive regulation of mitotic cell cycle (GO:0045931)	109	14	5.33	+	2.63	0.00179	0.0308
negative regulation of intracellular protein transport (GO:0090317)	41	8	2	+	3.99	0.00178	0.0309
protein targeting to vacuole (GO:0006623)	41	8	2	+	3.99	0.00178	0.0309
positive regulation of axon extension (GO:0045773)	41	8	2	+	3.99	0.00178	0.0309
negative regulation of cell-substrate adhesion (GO:0010812)	62	10	3.03	+	3.3	0.0018	0.031
DNA repair (GO:0006281)	530	11	25.91	-	0.42	0.00181	0.0311
positive regulation of neurogenesis (GO:0050769)	221	23	10.81	+	2.13	0.00181	0.0311
regulation of SA node cell action potential (GO:0098907)	3	3	0.15	+	20.45	0.00182	0.0312
hemopoiesis (GO:0030097)	572	46	27.97	+	1.64	0.00182	0.0313
purine ribonucleotide metabolic process (GO:0009150)	314	29	15.35	+	1.89	0.00183	0.0313
maintenance of protein location (GO:0045185)	97	13	4.74	+	2.74	0.00183	0.0313
regulation of phosphoprotein phosphatase activity (GO:0043666)	122	15	5.97	+	2.51	0.00184	0.0315
vascular associated smooth muscle cell differentiation (GO:0035886)	15	5	0.73	+	6.82	0.00188	0.032
negative regulation of calcineurin-mediated signaling (GO:0106057)	15	5	0.73	+	6.82	0.00188	0.032
negative regulation of calcineurin-NFAT signaling cascade (GO:0070885)	15	5	0.73	+	6.82	0.00188	0.032
positive regulation of endothelial cell chemotaxis (GO:2001028)	15	5	0.73	+	6.82	0.00188	0.0321
atrial septum morphogenesis (GO:0060413)	15	5	0.73	+	6.82	0.00188	0.0321
regulation of gene expression (GO:0010468)	4872	282	238.22	+	1.18	0.00189	0.0321
defense response to bacterium (GO:0042742)	345	5	16.87	-	0.3	0.00188	0.0321
amyloid-beta clearance (GO:0097242)	23	6	1.12	+	5.34	0.00191	0.0324
negative regulation of cell cycle G1/S phase transition (GO:1902807)	110	14	5.38	+	2.6	0.00193	0.0327
carbohydrate metabolic process (GO:0005975)	474	40	23.18	+	1.73	0.00194	0.0328
positive regulation of cation channel activity (GO:2001259)	74	11	3.62	+	3.04	0.00194	0.0328
dendritic spine organization (GO:0097061)	32	7	1.56	+	4.47	0.00195	0.0329
response to fluid shear stress (GO:0034405)	32	7	1.56	+	4.47	0.00195	0.0329
immune system development (GO:0002520)	656	51	32.08	+	1.59	0.00196	0.033
Golgi to plasma membrane transport (GO:0006893)	52	9	2.54	+	3.54	0.00196	0.033
cholesterol metabolic process (GO:0008203)	123	15	6.01	+	2.49	0.00198	0.0333
plasma membrane organization (GO:0007009)	98	13	4.79	+	2.71	0.00199	0.0334
regulation of Rho protein signal transduction (GO:0035023)	86	12	4.21	+	2.85	0.002	0.0334
positive regulation of protein binding (GO:0032092)	86	12	4.21	+	2.85	0.002	0.0335
response to corticosteroid (GO:0031960)	161	18	7.87	+	2.29	0.002	0.0335
cell population proliferation (GO:0008283)	477	40	23.32	+	1.72	0.00199	0.0335
calcium ion transport (GO:0006816)	244	24	11.93	+	2.01	0.00203	0.0339
neuron projection organization (GO:0106027)	42	8	2.05	+	3.9	0.00204	0.034
regulation of cell cycle (GO:0051726)	1196	83	58.48	+	1.42	0.00206	0.0344
regulation of cation channel activity (GO:2001257)	185	20	9.05	+	2.21	0.0021	0.035
translational initiation (GO:0006413)	143	0	6.99	-	< 0.01	0.00211	0.0351
cellular metal ion homeostasis (GO:0006875)	556	45	27.19	+	1.66	0.00217	0.036
protein localization to cell junction (GO:1902414)	87	12	4.25	+	2.82	0.00218	0.0362
small molecule biosynthetic process (GO:0044283)	558	45	27.28	+	1.65	0.0022	0.0364
negative regulation of endothelial cell migration (GO:0010596)	53	9	2.59	+	3.47	0.0022	0.0365
negative regulation of ERBB signaling pathway (GO:1901185)	53	9	2.59	+	3.47	0.0022	0.0365
regulation of fatty acid transport (GO:2000191)	53	9	2.59	+	3.47	0.0022	0.0365
tissue regeneration (GO:0042246)	64	10	3.13	+	3.2	0.00222	0.0366
negative regulation of cell growth (GO:0030308)	187	20	9.14	+	2.19	0.00224	0.037
negative regulation of striated muscle cell differentiation (GO:0051154)	33	7	1.61	+	4.34	0.00227	0.0374
regulation of wound healing (GO:0061041)	131	16	6.41	+	2.5	0.00228	0.0375
negative regulation of epithelial cell proliferation (GO:0050680)	131	16	6.41	+	2.5	0.00228	0.0376
negative regulation of organelle organization (GO:0010639)	332	30	16.23	+	1.85	0.0023	0.0378
ribonucleotide metabolic process (GO:0009259)	332	30	16.23	+	1.85	0.0023	0.0378
regulation of vascular permeability (GO:0043114)	43	8	2.1	+	3.8	0.00232	0.0381
endoplasmic reticulum organization (GO:0007029)	100	13	4.89	+	2.66	0.00233	0.0382
synapse assembly (GO:0007416)	100	13	4.89	+	2.66	0.00233	0.0382
RNA splicing, via transesterification reactions with bulged adenosine as nucleophile (GO:0000377)	302	4	14.77	-	0.27	0.00235	0.0383
mRNA splicing, via spliceosome (GO:0000398)	302	4	14.77	-	0.27	0.00235	0.0383
contractile actin filament bundle assembly (GO:0030038)	16	5	0.78	+	6.39	0.00237	0.0385
cardiac ventricle formation (GO:0003211)	9	4	0.44	+	9.09	0.00239	0.0385
stress fiber assembly (GO:0043149)	16	5	0.78	+	6.39	0.00237	0.0385
regulation of cardioblast proliferation (GO:0003264)	9	4	0.44	+	9.09	0.00239	0.0386
regulation of cell proliferation involved in heart morphogenesis (GO:2000136)	16	5	0.78	+	6.39	0.00237	0.0386
glucose homeostasis (GO:0042593)	189	20	9.24	+	2.16	0.0024	0.0386
cardiac neural crest cell differentiation involved in heart development (GO:0061307)	9	4	0.44	+	9.09	0.00239	0.0386
positive regulation of sodium ion transmembrane transporter activity (GO:2000651)	16	5	0.78	+	6.39	0.00237	0.0386
artery development (GO:0060840)	88	12	4.3	+	2.79	0.00237	0.0386
cardiac neural crest cell development involved in heart development (GO:0061308)	9	4	0.44	+	9.09	0.00239	0.0386
RNA splicing, via transesterification reactions (GO:0000375)	305	4	14.91	-	0.27	0.00241	0.0387
regulation of endopeptidase activity (GO:0052548)	424	36	20.73	+	1.74	0.00237	0.0387
regulation of steroid biosynthetic process (GO:0050810)	88	12	4.3	+	2.79	0.00237	0.0387
cellular response to reactive oxygen species (GO:0034614)	133	16	6.5	+	2.46	0.00242	0.0387
negative regulation of cAMP-dependent protein kinase activity (GO:2000480)	9	4	0.44	+	9.09	0.00239	0.0387
regulation of smooth muscle cell proliferation (GO:0048660)	133	16	6.5	+	2.46	0.00242	0.0387
T-tubule organization (GO:0033292)	9	4	0.44	+	9.09	0.00239	0.0387
purine nucleotide metabolic process (GO:0006163)	334	30	16.33	+	1.84	0.00241	0.0388
positive regulation of ryanodine-sensitive calcium-release channel activity (GO:0060316)	9	4	0.44	+	9.09	0.00239	0.0388
response to endoplasmic reticulum stress (GO:0034976)	258	25	12.62	+	1.98	0.00243	0.0389
lipid transport (GO:0006869)	364	32	17.8	+	1.8	0.00244	0.0389
regulation of sodium ion transmembrane transport (GO:1902305)	65	10	3.18	+	3.15	0.00245	0.0392
positive regulation of blood vessel endothelial cell migration (GO:0043536)	54	9	2.64	+	3.41	0.00247	0.0393
positive regulation of stress fiber assembly (GO:0051496)	54	9	2.64	+	3.41	0.00247	0.0393
cellular response to hypoxia (GO:0071456)	190	20	9.29	+	2.15	0.00249	0.0396
carbohydrate homeostasis (GO:0033500)	190	20	9.29	+	2.15	0.00249	0.0396
multicellular organismal signaling (GO:0035637)	134	16	6.55	+	2.44	0.00249	0.0396
organic acid biosynthetic process (GO:0016053)	285	27	13.94	+	1.94	0.0025	0.0397
regulation of actin filament bundle assembly (GO:0032231)	101	13	4.94	+	2.63	0.00252	0.04
aerobic respiration (GO:0009060)	77	11	3.76	+	2.92	0.00257	0.0407
skeletal muscle tissue regeneration (GO:0043403)	34	7	1.66	+	4.21	0.00263	0.0415
response to cytokine (GO:0034097)	1097	77	53.64	+	1.44	0.00269	0.0424
ncRNA processing (GO:0034470)	432	8	21.12	-	0.38	0.00269	0.0425
steroid metabolic process (GO:0008202)	262	25	12.81	+	1.95	0.0027	0.0425
RNA processing (GO:0006396)	923	26	45.13	-	0.58	0.0027	0.0426
maintenance of protein location in cell (GO:0032507)	66	10	3.23	+	3.1	0.00271	0.0426
negative regulation of angiogenesis (GO:0016525)	102	13	4.99	+	2.61	0.00273	0.0429
myoblast fusion (GO:0007520)	25	6	1.22	+	4.91	0.00273	0.0429
cell adhesion mediated by integrin (GO:0033627)	25	6	1.22	+	4.91	0.00273	0.0429
sensory system development (GO:0048880)	376	33	18.38	+	1.79	0.00275	0.0431
positive regulation of receptor-mediated endocytosis (GO:0048260)	55	9	2.69	+	3.35	0.00275	0.0431
camera-type eye development (GO:0043010)	318	29	15.55	+	1.87	0.00276	0.0432
reproductive structure development (GO:0048608)	408	35	19.95	+	1.75	0.00277	0.0433
memory (GO:0007613)	115	14	5.62	+	2.49	0.0028	0.0436
cellular response to metal ion (GO:0071248)	193	20	9.44	+	2.12	0.00279	0.0436
positive regulation of proteasomal ubiquitin-dependent protein catabolic process (GO:0032436)	90	12	4.4	+	2.73	0.0028	0.0437
cellular protein catabolic process (GO:0044257)	629	49	30.76	+	1.59	0.00287	0.0446
negative regulation of blood vessel morphogenesis (GO:2000181)	103	13	5.04	+	2.58	0.00294	0.0458
Golgi to endosome transport (GO:0006895)	17	5	0.83	+	6.02	0.00296	0.0459
positive regulation of NIK/NF-kappaB signaling (GO:1901224)	67	10	3.28	+	3.05	0.00299	0.0461
cellular response to epidermal growth factor stimulus (GO:0071364)	45	8	2.2	+	3.64	0.00298	0.0461
regulation of organic acid transport (GO:0032890)	67	10	3.28	+	3.05	0.00299	0.0462
regulation of extracellular matrix organization (GO:1903053)	45	8	2.2	+	3.64	0.00298	0.0462
cellular response to inorganic substance (GO:0071241)	220	22	10.76	+	2.05	0.00299	0.0462
positive regulation of cellular protein catabolic process (GO:1903364)	154	17	7.53	+	2.26	0.00298	0.0462
smooth muscle cell differentiation (GO:0051145)	35	7	1.71	+	4.09	0.00303	0.0467
sterol metabolic process (GO:0016125)	139	16	6.8	+	2.35	0.00303	0.0467
blood vessel remodeling (GO:0001974)	35	7	1.71	+	4.09	0.00303	0.0467
regulation of organ growth (GO:0046620)	91	12	4.45	+	2.7	0.00304	0.0468
dichotomous subdivision of terminal units involved in salivary gland branching (GO:0060666)	4	3	0.2	+	15.34	0.00307	0.0468
positive regulation of phosphatidylinositol 3-kinase signaling (GO:0014068)	91	12	4.45	+	2.7	0.00304	0.0468
actin filament fragmentation (GO:0030043)	4	3	0.2	+	15.34	0.00307	0.0468
sympathetic neuron projection extension (GO:0097490)	4	3	0.2	+	15.34	0.00307	0.0469
sympathetic neuron projection guidance (GO:0097491)	4	3	0.2	+	15.34	0.00307	0.0469
myosin filament organization (GO:0031033)	4	3	0.2	+	15.34	0.00307	0.047
myosin filament assembly (GO:0031034)	4	3	0.2	+	15.34	0.00307	0.047
regulation of muscle filament sliding (GO:0032971)	4	3	0.2	+	15.34	0.00307	0.047
calcium-independent cell-matrix adhesion (GO:0007161)	4	3	0.2	+	15.34	0.00307	0.0471
positive regulation of cell morphogenesis involved in differentiation (GO:0010770)	79	11	3.86	+	2.85	0.00307	0.0471
neural tube development (GO:0021915)	155	17	7.58	+	2.24	0.00313	0.0477
gastrulation (GO:0007369)	155	17	7.58	+	2.24	0.00313	0.0477
negative regulation of vasculature development (GO:1901343)	104	13	5.09	+	2.56	0.00317	0.0482
regulation of protein kinase A signaling (GO:0010738)	26	6	1.27	+	4.72	0.00323	0.0489
regulation of phosphatidylcholine metabolic process (GO:0150172)	10	4	0.49	+	8.18	0.00323	0.0489
endoplasmic reticulum calcium ion homeostasis (GO:0032469)	26	6	1.27	+	4.72	0.00323	0.0489
positive regulation of receptor binding (GO:1900122)	10	4	0.49	+	8.18	0.00323	0.049
carbohydrate derivative biosynthetic process (GO:1901137)	604	47	29.53	+	1.59	0.00323	0.049
action potential (GO:0001508)	92	12	4.5	+	2.67	0.0033	0.0498

## Sheet: seg3 > seg1 pathways
signaling pathways identified in GO term analysis: myocardial segment 3 > common progenitor segment 1
GO biological process complete - pathways	Homo sapiens - REFLIST (20595)	#genes	upload_1 (expected)	upload_1 (over/under)	upload_1 (fold Enrichment)	upload_1 (raw P-value)	FDR		as shown in Figure 5
enzyme linked receptor protein signaling pathway (GO:0007167)	726	90	35.5	+	2.54	2.77e-14	5.59e-12
transmembrane receptor protein tyrosine kinase signaling pathway (GO:0007169)	519	66	25.38	+	2.6	4.41e-11	5.07e-09
cell surface receptor signaling pathway involved in cell-cell signaling (GO:1905114)	419	42	20.49	+	2.05	4.32e-05	0.00139
Wnt signaling pathway (GO:0016055)	349	38	17.06	+	2.23	1.48e-05	0.000535
cell-cell signaling by wnt (GO:0198738)	349	38	17.06	+	2.23	1.48e-05	0.000536
regulation of Wnt signaling pathway (GO:0030111)	366	35	17.9	+	1.96	0.000431	0.00969
regulation of transmembrane receptor protein serine/threonine kinase signaling pathway (GO:0090092)	251	33	12.27	+	2.69	1.38e-06	6.23e-05
regulation of canonical Wnt signaling pathway (GO:0060828)	288	31	14.08	+	2.2	0.000128	0.00351
regulation of protein kinase B signaling (GO:0051896)	237	26	11.59	+	2.24	0.000308	0.00731
regulation of stress-activated protein kinase signaling cascade (GO:0070302)	181	25	8.85	+	2.82	1.21e-05	0.000445
negative regulation of Wnt signaling pathway (GO:0030178)	214	24	10.46	+	2.29	0.000472	0.0105
negative regulation of canonical Wnt signaling pathway (GO:0090090)	182	23	8.9	+	2.58	0.000145	0.00388
transmembrane receptor protein serine/threonine kinase signaling pathway (GO:0007178)	197	23	9.63	+	2.39	0.000287	0.0069
positive regulation of protein kinase B signaling (GO:0051897)	181	21	8.85	+	2.37	0.000573	0.0124
regulation of transforming growth factor beta receptor signaling pathway (GO:0017015)	121	20	5.92	+	3.38	8.86e-06	0.000339
integrin-mediated signaling pathway (GO:0007229)	98	19	4.79	+	3.97	1.93e-06	8.45e-05
calcium-mediated signaling (GO:0019722)	145	19	7.09	+	2.68	0.000239	0.00586
positive regulation of transmembrane receptor protein serine/threonine kinase signaling pathway (GO:0090100)	108	17	5.28	+	3.22	7.04e-05	0.00209
negative regulation of transmembrane receptor protein serine/threonine kinase signaling pathway (GO:0090101)	140	17	6.85	+	2.48	0.00161	0.0287
vascular endothelial growth factor receptor signaling pathway (GO:0048010)	71	16	3.47	+	4.61	2.32e-06	9.91e-05
regulation of phosphatidylinositol 3-kinase signaling (GO:0014066)	126	16	6.16	+	2.6	0.000973	0.0194
regulation of NIK/NF-kappaB signaling (GO:1901222)	98	15	4.79	+	3.13	0.000242	0.00592
regulation of BMP signaling pathway (GO:0030510)	102	15	4.99	+	3.01	0.000355	0.00827
transforming growth factor beta receptor signaling pathway (GO:0007179)	102	15	4.99	+	3.01	0.000355	0.00828
positive regulation of stress-activated protein kinase signaling cascade (GO:0070304)	117	15	5.72	+	2.62	0.00127	0.0237
insulin receptor signaling pathway (GO:0008286)	85	14	4.16	+	3.37	0.000197	0.00504
regulation of ERBB signaling pathway (GO:1901184)	94	13	4.6	+	2.83	0.00142	0.0261
ERBB signaling pathway (GO:0038127)	70	12	3.42	+	3.51	0.000402	0.00911
positive regulation of phosphatidylinositol 3-kinase signaling (GO:0014068)	91	12	4.45	+	2.7	0.00304	0.0468
positive regulation of NIK/NF-kappaB signaling (GO:1901224)	67	10	3.28	+	3.05	0.00299	0.0461
vascular endothelial growth factor signaling pathway (GO:0038084)	23	9	1.12	+	8	1.07e-05	0.000397
negative regulation of ERBB signaling pathway (GO:1901185)	53	9	2.59	+	3.47	0.0022	0.0365
hippo signaling (GO:0035329)	28	8	1.37	+	5.84	0.000205	0.00519
platelet-derived growth factor receptor signaling pathway (GO:0048008)	35	8	1.71	+	4.67	0.000734	0.0154
positive regulation of transforming growth factor beta receptor signaling pathway (GO:0030511)	28	7	1.37	+	5.11	0.001	0.0199
regulation of protein kinase A signaling (GO:0010738)	26	6	1.27	+	4.72	0.00323	0.0489
insulin-like growth factor receptor signaling pathway (GO:0048009)	13	5	0.64	+	7.87	0.00112	0.0218
positive regulation of extrinsic apoptotic signaling pathway via death domain receptors (GO:1902043)	13	5	0.64	+	7.87	0.00112	0.0218
negative regulation of calcineurin-mediated signaling (GO:0106057)	15	5	0.73	+	6.82	0.00188	0.032
negative regulation of calcineurin-NFAT signaling cascade (GO:0070885)	15	5	0.73	+	6.82	0.00188	0.032
positive regulation of cell migration by vascular endothelial growth factor signaling pathway (GO:0038089)	8	4	0.39	+	10.23	0.00172	0.0302

## Sheet: Kutools_Chart
76
76
76
76
76
76
76
76
76
76
76
76
76
76
76
76
76
76
76
76
76
76
76
76
76
76
76
76
76
76
76
76
76
76
76
76
76
76
76
76
76
76
76
76
76
76
76
76
76
76
76
76
76
76
76
76
76
76
76
76
76
76
76
76
76
76
76
76
76
76
76
0
52
52
52
52
52
52
52
52
52
52
52
52
52
52
52
52
52
52
52
52
52
52
52
52
52
52
52
52
52
52
52
52
52
52
52
52
52
52
52
52
52
52
52
52
52
52
52
52
52
52
52
52
52
52
52
52
52
52
52
52
52
52
52
52
52
52
52
52
52
52
52
0
50
50
50
50
50
50
50
50
50
50
50
50
50
50
50
50
50
50
50
50
50
50
50
50
50
50
50
50
50
50
50
50
50
50
50
50
50
50
50
50
50
50
50
50
50
50
50
50
50
50
50
50
50
50
50
50
50
50
50
50
50
50
50
50
50
50
50
50
50
50
50
0
37
37
37
37
37
37
37
37
37
37
37
37
37
37
37
37
37
37
37
37
37
37
37
37
37
37
37
37
37
37
37
37
37
37
37
37
37
37
37
37
37
37
37
37
37
37
37
37
37
37
37
37
37
37
37
37
37
37
37
37
37
37
37
37
37
37
37
37
37
37
37
0
36
36
36
36
36
36
36
36
36
36
36
36
36
36
36
36
36
36
36
36
36
36
36
36
36
36
36
36
36
36
36
36
36
36
36
36
36
36
36
36
36
36
36
36
36
36
36
36
36
36
36
36
36
36
36
36
36
36
36
36
36
36
36
36
36
36
36
36
36
36
36
0
35
35
35
35
35
35
35
35
35
35
35
35
35
35
35
35
35
35
35
35
35
35
35
35
35
35
35
35
35
35
35
35
35
35
35
35
35
35
35
35
35
35
35
35
35
35
35
35
35
35
35
35
35
35
35
35
35
35
35
35
35
35
35
35
35
35
35
35
35
35
35
0
27
27
27
27
27
27
27
27
27
27
27
27
27
27
27
27
27
27
27
27
27
27
27
27
27
27
27
27
27
27
27
27
27
27
27
27
27
27
27
27
27
27
27
27
27
27
27
27
27
27
27
27
27
27
27
27
27
27
27
27
27
27
27
27
27
27
27
27
27
27
27
0
24
24
24
24
24
24
24
24
24
24
24
24
24
24
24
24
24
24
24
24
24
24
24
24
24
24
24
24
24
24
24
24
24
24
24
24
24
24
24
24
24
24
24
24
24
24
24
24
24
24
24
24
24
24
24
24
24
24
24
24
24
24
24
24
24
24
24
24
24
24
24
0
24
24
24
24
24
24
24
24
24
24
24
24
24
24
24
24
24
24
24
24
24
24
24
24
24
24
24
24
24
24
24
24
24
24
24
24
24
24
24
24
24
24
24
24
24
24
24
24
24
24
24
24
24
24
24
24
24
24
24
24
24
24
24
24
24
24
24
24
24
24
24
0
21
21
21
21
21
21
21
21
21
21
21
21
21
21
21
21
21
21
21
21
21
21
21
21
21
21
21
21
21
21
21
21
21
21
21
21
21
21
21
21
21
21
21
21
21
21
21
21
21
21
21
21
21
21
21
21
21
21
21
21
21
21
21
21
21
21
21
21
21
21
21
0
18
18
18
18
18
18
18
18
18
18
18
18
18
18
18
18
18
18
18
18
18
18
18
18
18
18
18
18
18
18
18
18
18
18
18
18
18
18
18
18
18
18
18
18
18
18
18
18
18
18
18
18
18
18
18
18
18
18
18
18
18
18
18
18
18
18
18
18
18
18
18
0
17
17
17
17
17
17
17
17
17
17
17
17
17
17
17
17
17
17
17
17
17
17
17
17
17
17
17
17
17
17
17
17
17
17
17
17
17
17
17
17
17
17
17
17
17
17
17
17
17
17
17
17
17
17
17
17
17
17
17
17
17
17
17
17
17
17
17
17
17
17
17
0
17
17
17
17
17
17
17
17
17
17
17
17
17
17
17
17
17
17
17
17
17
17
17
17
17
17
17
17
17
17
17
17
17
17
17
17
17
17
17
17
17
17
17
17
17
17
17
17
17
17
17
17
17
17
17
17
17
17
17
17
17
17
17
17
17
17
17
17
17
17
17
0
17
17
17
17
17
17
17
17
17
17
17
17
17
17
17
17
17
17
17
17
17
17
17
17
17
17
17
17
17
17
17
17
17
17
17
17
17
17
17
17
17
17
17
17
17
17
17
17
17
17
17
17
17
17
17
17
17
17
17
17
17
17
17
17
17
17
17
17
17
17
17
0
16
16
16
16
16
16
16
16
16
16
16
16
16
16
16
16
16
16
16
16
16
16
16
16
16
16
16
16
16
16
16
16
16
16
16
16
16
16
16
16
16
16
16
16
16
16
16
16
16
16
16
16
16
16
16
16
16
16
16
16
16
16
16
16
16
16
16
16
16
16
16
0
15
15
15
15
15
15
15
15
15
15
15
15
15
15
15
15
15
15
15
15
15
15
15
15
15
15
15
15
15
15
15
15
15
15
15
15
15
15
15
15
15
15
15
15
15
15
15
15
15
15
15
15
15
15
15
15
15
15
15
15
15
15
15
15
15
15
15
15
15
15
15
0
15
15
15
15
15
15
15
15
15
15
15
15
15
15
15
15
15
15
15
15
15
15
15
15
15
15
15
15
15
15
15
15
15
15
15
15
15
15
15
15
15
15
15
15
15
15
15
15
15
15
15
15
15
15
15
15
15
15
15
15
15
15
15
15
15
15
15
15
15
15
15
0
10
10
10
10
10
10
10
10
10
10
10
10
10
10
10
10
10
10
10
10
10
10
10
10
10
10
10
10
10
10
10
10
10
10
10
10
10
10
10
10
10
10
10
10
10
10
10
10
10
10
10
10
10
10
10
10
10
10
10
10
10
10
10
10
10
10
10
10
10
10
10
0
9
9
9
9
9
9
9
9
9
9
9
9
9
9
9
9
9
9
9
9
9
9
9
9
9
9
9
9
9
9
9
9
9
9
9
9
9
9
9
9
9
9
9
9
9
9
9
9
9
9
9
9
9
9
9
9
9
9
9
9
9
9
9
9
9
9
9
9
9
9
9
0
8
8
8
8
8
8
8
8
8
8
8
8
8
8
8
8
8
8
8
8
8
8
8
8
8
8
8
8
8
8
8
8
8
8
8
8
8
8
8
8
8
8
8
8
8
8
8
8
8
8
8
8
8
8
8
8
8
8
8
8
8
8
8
8
8
8
8
8
8
8
8
0
8
8
8
8
8
8
8
8
8
8
8
8
8
8
8
8
8
8
8
8
8
8
8
8
8
8
8
8
8
8
8
8
8
8
8
8
8
8
8
8
8
8
8
8
8
8
8
8
8
8
8
8
8
8
8
8
8
8
8
8
8
8
8
8
8
8
8
8
8
8
8
0
8
8
8
8
8
8
8
8
8
8
8
8
8
8
8
8
8
8
8
8
8
8
8
8
8
8
8
8
8
8
8
8
8
8
8
8
8
8
8
8
8
8
8
8
8
8
8
8
8
8
8
8
8
8
8
8
8
8
8
8
8
8
8
8
8
8
8
8
8
8
8
0
7
7
7
7
7
7
7
7
7
7
7
7
7
7
7
7
7
7
7
7
7
7
7
7
7
7
7
7
7
7
7
7
7
7
7
7
7
7
7
7
7
7
7
7
7
7
7
7
7
7
7
7
7
7
7
7
7
7
7
7
7
7
7
7
7
7
7
7
7
7
7
0
6
6
6
6
6
6
6
6
6
6
6
6
6
6
6
6
6
6
6
6
6
6
6
6
6
6
6
6
6
6
6
6
6
6
6
6
6
6
6
6
6
6
6
6
6
6
6
6
6
6
6
6
6
6
6
6
6
6
6
6
6
6
6
6
6
6
6
6
6
6
6
0
6
6
6
6
6
6
6
6
6
6
6
6
6
6
6
6
6
6
6
6
6
6
6
6
6
6
6
6
6
6
6
6
6
6
6
6
6
6
6
6
6
6
6
6
6
6
6
6
6
6
6
6
6
6
6
6
6
6
6
6
6
6
6
6
6
6
6
6
6
6
6
0
6.59e-08
6.59e-08
6.59e-08
6.59e-08
6.59e-08
6.59e-08
6.59e-08
6.59e-08
6.59e-08
6.59e-08
6.59e-08
6.59e-08
6.59e-08
6.59e-08
6.59e-08	0.00675
	0.00675
	0.00675
	0.00675
	0.00675
	0.00675
	0.00675
	0.00675
	0.00675
	0.00675
	0.00675
	0.00675
	0.00675
	0.00675
	0.00675	0.00019
		0.00019
		0.00019
		0.00019
		0.00019
		0.00019
		0.00019
		0.00019
		0.00019
		0.00019
		0.00019
		0.00019
		0.00019
		0.00019
		0.00019	0.00806
			0.00806
			0.00806
			0.00806
			0.00806
			0.00806
			0.00806
			0.00806
			0.00806
			0.00806
			0.00806
			0.00806
			0.00806
			0.00806
			0.00806	0.00131
				0.00131
				0.00131
				0.00131
				0.00131
				0.00131
				0.00131
				0.00131
				0.00131
				0.00131
				0.00131
				0.00131
				0.00131
				0.00131
				0.00131	0.00127
					0.00127
					0.00127
					0.00127
					0.00127
					0.00127
					0.00127
					0.00127
					0.00127
					0.00127
					0.00127
					0.00127
					0.00127
					0.00127
					0.00127	0.00655
						0.00655
						0.00655
						0.00655
						0.00655
						0.00655
						0.00655
						0.00655
						0.00655
						0.00655
						0.00655
						0.00655
						0.00655
						0.00655
						0.00655	0.000329
							0.000329
							0.000329
							0.000329
							0.000329
							0.000329
							0.000329
							0.000329
							0.000329
							0.000329
							0.000329
							0.000329
							0.000329
							0.000329
							0.000329	0.0417
								0.0417
								0.0417
								0.0417
								0.0417
								0.0417
								0.0417
								0.0417
								0.0417
								0.0417
								0.0417
								0.0417
								0.0417
								0.0417
								0.0417	8.43e-06
									8.43e-06
									8.43e-06
									8.43e-06
									8.43e-06
									8.43e-06
									8.43e-06
									8.43e-06
									8.43e-06
									8.43e-06
									8.43e-06
									8.43e-06
									8.43e-06
									8.43e-06
									8.43e-06	0.00723
										0.00723
										0.00723
										0.00723
										0.00723
										0.00723
										0.00723
										0.00723
										0.00723
										0.00723
										0.00723
										0.00723
										0.00723
										0.00723
										0.00723	0.00798
											0.00798
											0.00798
											0.00798
											0.00798
											0.00798
											0.00798
											0.00798
											0.00798
											0.00798
											0.00798
											0.00798
											0.00798
											0.00798
											0.00798	0.0164
												0.0164
												0.0164
												0.0164
												0.0164
												0.0164
												0.0164
												0.0164
												0.0164
												0.0164
												0.0164
												0.0164
												0.0164
												0.0164
												0.0164	0.0228
													0.0228
													0.0228
													0.0228
													0.0228
													0.0228
													0.0228
													0.0228
													0.0228
													0.0228
													0.0228
													0.0228
													0.0228
													0.0228
													0.0228	0.00862
														0.00862
														0.00862
														0.00862
[truncated: 6,453 more rows]
[truncated: 10 more columns]
