# Supplementary material for: A single cell transcriptional roadmap of human pacemaker cell differentiation
Source: eLife. 2022 Oct 11;11:e76781. doi: 10.7554/eLife.76781 (PMC9553210; doi:10.7554/eLife.76781)
Supplement: Supplementary file 4. — Related to Figure 6. [file elife-76781-supp4.xlsx]

## Sheet: seg 6 > seg 3
	AUCPR	AUCPR.ratio	exp.fc	posFrac_1	posFrac_2	nTrans_1	nTrans_2
SHOX2	0.861	5.20151	3.7636	0.979	0.292	1.992	0.286
POPDC2	0.841	5.08068	1.80842	1	0.789	2.455	1.189
MYH11	0.84	5.07464	2.48362	1	0.671	3.118	1.247
BMP4	0.823	4.97194	3.45916	0.979	0.524	2.907	0.67
CAPN3	0.766	4.62759	3.93865	0.825	0.204	1.351	0.139
PAM	0.765	4.62155	1.65758	0.99	0.975	2.933	1.634
FITM1	0.754	4.55509	3.06074	0.897	0.313	1.268	0.225
SPHKAP	0.742	4.4826	3.01078	0.938	0.329	1.521	0.301
BTG1	0.719	4.34365	1.58874	0.979	0.843	1.921	0.946
VSNL1	0.712	4.30136	2.80998	0.887	0.409	1.585	0.362
KLHL41	0.705	4.25907	2.96617	0.907	0.292	1.354	0.262
PPP1R1A	0.705	4.25907	2.06803	0.938	0.632	1.697	0.618
SHD	0.703	4.24699	2.80236	0.876	0.337	1.26	0.263
TBX3	0.702	4.24095	4.19211	0.691	0.166	1.131	0.091
PLCB1	0.701	4.23491	2.33744	0.897	0.511	1.301	0.367
LRRTM3	0.695	4.19866	4.68467	0.577	0.051	0.657	0.032
WNT5A	0.692	4.18054	2.94271	0.845	0.358	1.303	0.252
SGPP2	0.681	4.11408	4.19677	0.639	0.078	0.708	0.049
C1orf105	0.671	4.05367	4.35972	0.567	0.059	0.532	0.031
CIRBP	0.668	4.03555	1.21181	1	0.93	1.931	1.147
RASSF5	0.657	3.96909	2.35037	0.887	0.403	1.071	0.282
TCEA3	0.657	3.96909	3.26691	0.722	0.164	0.794	0.106
NELL1	0.653	3.94493	4.11572	0.567	0.086	0.62	0.044
CADPS2	0.645	3.8966	2.70038	0.866	0.313	1.143	0.246
MYH6	0.643	3.88452	1.4018	1	0.867	3.216	2.049
CORIN	0.641	3.87243	3.55743	0.66	0.117	0.828	0.092
CLGN	0.633	3.8241	2.73008	0.732	0.258	0.801	0.153
SLIT2	0.629	3.79994	1.57871	0.969	0.836	2.236	1.165
RRAD	0.627	3.78786	2.91761	0.866	0.254	1.42	0.289
SCP2	0.625	3.77577	1.55643	0.897	0.73	1.296	0.58
TMX4	0.625	3.77577	2.03958	0.897	0.579	1.309	0.443
PLPP3	0.619	3.73953	3.81803	0.608	0.063	0.801	0.074
MPP6	0.617	3.72744	2.09935	0.814	0.505	1.147	0.36
NRTN	0.614	3.70932	3.21089	0.67	0.133	0.699	0.094
CDK8	0.603	3.64287	3.43005	0.567	0.129	0.641	0.073
HACD1	0.602	3.63682	3.31352	0.608	0.094	0.777	0.1
BEX3	0.6	3.62474	3.01633	0.784	0.106	1.921	0.427
TNFAIP8	0.599	3.6187	2.65816	0.701	0.264	0.725	0.142
LINC00997	0.588	3.55225	3.49641	0.588	0.074	0.724	0.081
NFIC	0.582	3.516	1.90498	0.897	0.542	1.171	0.416
HIPK3	0.578	3.49184	2.07513	0.835	0.493	1.209	0.391
NPTN-IT1	0.578	3.49184	3.49934	0.577	0.074	0.796	0.091
HSPB3	0.577	3.48579	2.45236	0.804	0.284	1.054	0.259
LINC01578	0.575	3.47371	3.17419	0.629	0.086	0.691	0.095
GARNL3	0.573	3.46163	2.75781	0.608	0.237	0.689	0.125
WLS	0.571	3.44955	1.03953	1	0.961	2.298	1.539
CXCL12	0.57	3.44351	2.35138	0.918	0.446	1.85	0.595
KMT2E	0.568	3.43142	3.18468	0.598	0.088	0.695	0.095
FBXO9	0.567	3.42538	1.30291	0.876	0.773	1.243	0.636
FGD6	0.564	3.40726	1.67936	0.773	0.591	0.981	0.383
GATA6-AS1	0.564	3.40726	3.51969	0.515	0.072	0.62	0.066
KLHL42	0.561	3.38913	3.2442	0.598	0.074	0.649	0.084
GOLIM4	0.56	3.38309	2.22652	0.845	0.458	1.231	0.365
SREBF2	0.56	3.38309	1.91439	0.794	0.575	1.12	0.391
DPF3	0.56	3.38309	3.27445	0.546	0.119	0.647	0.082
ASPH	0.558	3.37101	1.49588	0.887	0.722	1.318	0.613
ECHDC2	0.558	3.37101	2.57048	0.701	0.225	0.691	0.142
MSI2	0.558	3.37101	2.79238	0.66	0.186	0.739	0.133
HAND2-AS1	0.554	3.34685	3.43416	0.515	0.065	0.568	0.063
PLCL1	0.549	3.31664	3.19537	0.505	0.115	0.411	0.051
PNRC1	0.548	3.3106	1.33597	0.959	0.808	1.552	0.82
LINC00504	0.54	3.26227	3.01636	0.619	0.09	0.833	0.133
LINC00998	0.54	3.26227	3.1792	0.546	0.078	0.632	0.085
ZNF106	0.539	3.25623	3.26093	0.526	0.067	0.596	0.075
COLQ	0.536	3.2381	2.33151	0.608	0.252	0.601	0.141
FEZ1	0.536	3.2381	2.17106	0.691	0.35	0.755	0.205
ESRRG	0.534	3.22602	2.1132	0.691	0.366	0.86	0.249
KMT2C	0.533	3.21998	3.07477	0.515	0.082	0.572	0.081
FAM189A2	0.532	3.21394	2.44454	0.753	0.28	0.859	0.201
ATP1A2	0.53	3.20186	2.98321	0.639	0.147	0.67	0.104
MICU2	0.527	3.18373	3.13757	0.536	0.07	0.478	0.063
APOBEC2	0.526	3.17769	2.52447	0.732	0.207	0.823	0.181
LOC729348	0.525	3.17165	3.1721	0.515	0.078	0.592	0.079
PRKAR2A	0.524	3.16561	2.84543	0.629	0.162	0.699	0.12
TMEM261	0.524	3.16561	2.9399	0.639	0.088	0.746	0.122
UBR3	0.522	3.15353	1.22445	0.876	0.757	1.214	0.646
PCDH9	0.522	3.15353	2.96621	0.536	0.174	0.637	0.099
CFAP20	0.521	3.14748	3.12052	0.526	0.084	0.581	0.08
MGAT5	0.52	3.14144	1.79233	0.732	0.558	0.971	0.353
HTRA1	0.517	3.12332	1.5746	0.887	0.669	1.728	0.829
CNIH1	0.517	3.12332	2.96991	0.588	0.082	0.578	0.088
LGALS3BP	0.516	3.11728	2.58776	0.856	0.178	0.993	0.22
HNRNPDL	0.513	3.09915	2.76691	0.742	0.1	1.236	0.262
TIMP3	0.512	3.09311	1.72604	0.856	0.556	1.294	0.525
SRGAP2B	0.512	3.09311	3.02261	0.546	0.08	0.733	0.113
COL4A6	0.511	3.08707	1.34499	0.907	0.808	1.512	0.79
ATP2A2	0.508	3.06895	0.989376	1	0.998	3.552	2.679
COX20	0.507	3.06291	2.60493	0.68	0.207	0.773	0.159
MB	0.503	3.03874	2.57248	0.66	0.19	0.724	0.15
NRXN1	0.502	3.0327	2.74326	0.557	0.131	0.614	0.11
SMIM19	0.502	3.0327	2.94081	0.505	0.074	0.443	0.066
CFLAR	0.501	3.02666	1.07604	0.887	0.81	1.31	0.767
CACNA1D	0.5	3.02062	2.29314	0.732	0.249	0.747	0.187
RNF150	0.5	3.02062	1.69405	0.742	0.468	0.741	0.272
ATP1B2	0.498	3.00854	1.06131	0.99	0.881	1.712	1.064
PTP4A3	0.498	3.00854	1.67625	0.763	0.515	0.854	0.325
ERBIN	0.498	3.00854	2.97446	0.505	0.084	0.557	0.084
DENND1B	0.496	2.99645	1.78326	0.67	0.442	0.676	0.231
LAMA2	0.495	2.99041	1.70752	0.742	0.464	0.941	0.358
ERCC-00136	0.494	2.98437	1.27879	0.948	0.826	1.379	0.731
QPRT	0.493	2.97833	1.40451	0.866	0.708	1.17	0.558
PMP22	0.49	2.96021	2.55809	0.649	0.231	0.86	0.187
NDRG2	0.489	2.95416	1.51726	0.732	0.558	0.939	0.401
GPR37	0.484	2.92396	1.56891	0.897	0.611	1.26	0.556
RACK1	0.483	2.91792	2.70484	0.784	0.106	2.014	0.552
KCNIP4	0.481	2.90584	2.09367	0.68	0.297	0.718	0.203
TESC	0.48	2.89979	2.72253	0.505	0.139	0.486	0.085
NORAD	0.479	2.89375	2.64774	0.732	0.1	0.95	0.2
TECRL	0.477	2.88167	0.821924	1	0.99	3.185	2.48
GATSL2	0.475	2.86959	2.79689	0.546	0.084	0.518	0.087
ADD1	0.474	2.86355	0.766642	0.928	0.951	1.685	1.203
LOC642366	0.474	2.86355	2.23563	0.567	0.28	0.648	0.164
NRDC	0.474	2.86355	2.64826	0.598	0.096	0.7	0.137
FLJ44635	0.473	2.85751	2.63659	0.557	0.125	0.537	0.101
BMP7	0.472	2.85146	2.09675	0.711	0.294	0.847	0.247
FIGN	0.47	2.83938	2.05167	0.619	0.346	0.684	0.197
PITPNB	0.468	2.8273	1.15641	0.887	0.748	1.055	0.569
PLCB4	0.467	2.82126	1.90599	0.66	0.38	0.747	0.24
RPS17	0.466	2.81522	2.5035	0.773	0.106	1.265	0.319
TMED4	0.465	2.80918	2.12889	0.66	0.317	0.744	0.207
MRPL57	0.464	2.80313	2.66688	0.505	0.09	0.48	0.087
KMT2A	0.463	2.79709	2.65695	0.526	0.086	0.571	0.107
LRRC75A-AS1	0.463	2.79709	2.49183	0.722	0.104	0.963	0.225
PPP4R2	0.462	2.79105	2.08388	0.598	0.301	0.663	0.186
SNU13	0.462	2.79105	2.56683	0.588	0.098	0.632	0.128
LAMB2	0.46	2.77897	1.30099	0.918	0.73	1.211	0.617
ABCC5	0.459	2.77293	1.71801	0.742	0.429	0.703	0.252
NBEA	0.459	2.77293	1.34992	0.835	0.654	1.085	0.526
RYR2	0.458	2.76689	1.16731	0.918	0.8	1.682	0.988
MXI1	0.457	2.76085	1.78736	0.68	0.407	0.675	0.23
NCAM1	0.457	2.76085	1.64067	0.938	0.624	1.656	0.757
ACOT13	0.454	2.74272	1.15114	0.856	0.738	1.12	0.612
TRDN	0.454	2.74272	1.18673	0.938	0.738	1.594	0.916
BMP5	0.453	2.73668	1.15679	0.866	0.765	1.263	0.703
RPS6KA2	0.452	2.73064	1.22186	0.876	0.697	1.192	0.633
SARAF	0.451	2.7246	2.29875	0.66	0.096	0.928	0.243
EEF1A2	0.45	2.71856	1.50131	0.856	0.54	1.167	0.526
SOBP	0.449	2.71252	1.91896	0.608	0.354	0.685	0.215
LOC101928103	0.449	2.71252	2.59045	0.526	0.096	0.576	0.113
YPEL3	0.446	2.69439	1.60408	0.742	0.436	0.719	0.278
TBX5	0.444	2.68231	0.890881	0.938	0.877	1.552	1.03
ERCC-00108	0.443	2.67627	0.975636	0.969	0.926	1.636	1.051
FER	0.443	2.67627	2.20216	0.536	0.235	0.589	0.15
CTSV	0.442	2.67023	2.49983	0.515	0.092	0.794	0.176
SERINC1	0.441	2.66419	0.741606	0.897	0.859	1.207	0.834
ZNF302	0.441	2.66419	1.79966	0.66	0.346	0.586	0.194
ZFAS1	0.44	2.65814	2.54032	0.577	0.094	0.635	0.131
DDX17	0.439	2.6521	0.683506	0.969	0.959	1.897	1.431
ERCC-00003	0.437	2.64002	0.964849	0.99	0.941	1.63	1.052
NR2F2	0.436	2.63398	1.02514	0.897	0.838	1.518	0.938
ISL1	0.435	2.62794	1.13647	0.969	0.773	1.797	1.088
ERCC-00009	0.433	2.61586	0.940483	0.979	0.951	1.769	1.173
TNNI1	0.433	2.61586	0.706329	1	0.998	3.06	2.459
PROX1	0.431	2.60377	1.88076	0.598	0.297	0.597	0.188
TNNT2	0.431	2.60377	0.645517	1	0.998	3.744	3.158
TMBIM6	0.43	2.59773	0.462212	0.99	0.984	2.011	1.678
HIST2H2BE	0.428	2.58565	2.06922	0.536	0.258	0.568	0.157
TOM1L2	0.424	2.56148	1.42554	0.67	0.509	0.709	0.306
HSPB7	0.424	2.56148	1.08392	0.959	0.818	1.785	1.107
GABARAPL2	0.423	2.55544	0.778751	0.897	0.875	1.236	0.84
ASAH1	0.422	2.5494	0.912752	0.969	0.896	1.791	1.206
LUC7L3	0.422	2.5494	0.785452	0.887	0.881	1.501	1.044
SMARCD3	0.422	2.5494	1.04495	0.794	0.697	0.899	0.505
RNA45S5	0.422	2.5494	2.22739	0.526	0.09	0.675	0.173
RBPMS2	0.42	2.53732	0.832513	0.928	0.863	1.367	0.916
CPEB4	0.419	2.53128	1.01784	0.866	0.779	1.247	0.747
ALDOC	0.417	2.5192	1.94783	0.536	0.301	0.568	0.17
RNPC3	0.417	2.5192	1.5734	0.691	0.479	0.779	0.311
HIF3A	0.416	2.51315	1.55832	0.722	0.476	0.777	0.313
ITGB5	0.416	2.51315	1.19103	0.835	0.652	0.947	0.492
NUDT4	0.416	2.51315	1.57165	0.691	0.456	0.789	0.316
TXNIP	0.416	2.51315	1.47041	0.938	0.613	1.574	0.777
DMD	0.415	2.50711	1.28735	0.773	0.591	0.963	0.474
PLEKHA6	0.415	2.50711	2.04569	0.567	0.215	0.551	0.154
MTUS2	0.414	2.50107	1.4679	0.66	0.45	0.709	0.298
LDHA	0.413	2.49503	1.21248	0.948	0.816	1.787	1.041
KAT6B	0.412	2.48899	1.57581	0.577	0.393	0.56	0.213
PPP1R12B	0.412	2.48899	0.911759	0.979	0.898	2.014	1.387
SLC30A3	0.412	2.48899	1.56476	0.691	0.472	0.864	0.353
WIPF3	0.412	2.48899	1.15369	0.773	0.593	0.841	0.439
CPVL	0.411	2.48295	1.39705	0.701	0.507	0.72	0.317
STAT3	0.411	2.48295	1.36309	0.701	0.558	0.738	0.333
TMEM41A	0.41	2.47691	1.33118	0.649	0.505	0.608	0.273
LAPTM4B	0.409	2.47087	0.510014	1	0.994	2.393	1.995
TBC1D4	0.409	2.47087	1.40974	0.691	0.472	0.729	0.319
CTDSP1	0.408	2.46482	1.43503	0.629	0.456	0.579	0.242
VAMP2	0.408	2.46482	0.873121	0.969	0.898	1.477	0.981
HACD3	0.408	2.46482	2.27355	0.546	0.09	0.531	0.127
TRPM7	0.407	2.45878	1.12737	0.701	0.587	0.728	0.379
ALDOA	0.406	2.45274	0.646272	1	0.975	1.995	1.54
NDUFA11	0.405	2.4467	0.752433	0.938	0.885	1.239	0.854
LDHB	0.404	2.44066	0.50162	1	0.994	2.397	2.005
PDK2	0.403	2.43462	1.34099	0.66	0.515	0.706	0.321
MLIP	0.403	2.43462	1.83821	0.629	0.294	0.58	0.187
NDUFS2	0.402	2.42858	0.782166	0.784	0.804	1.126	0.755
NEXN	0.402	2.42858	0.762286	0.969	0.885	1.682	1.203
PBX1	0.402	2.42858	1.00965	0.948	0.838	1.493	0.927
MKRN1	0.401	2.42254	0.799136	0.938	0.867	1.313	0.89
CLSTN1	0.399	2.41045	1.06421	0.711	0.65	0.758	0.412
MTHFR	0.399	2.41045	1.50716	0.619	0.395	0.536	0.212
PLCL2	0.399	2.41045	1.36885	0.701	0.55	0.821	0.375
PPP1R13B	0.399	2.41045	1.85637	0.526	0.233	0.403	0.123
LHFPL2	0.397	2.39837	1.11058	0.753	0.632	0.86	0.462
PDE4DIP	0.396	2.39233	1.43787	0.66	0.474	0.683	0.291
KIF1C	0.395	2.38629	0.941145	0.753	0.646	0.737	0.43
MOAP1	0.395	2.38629	1.36793	0.619	0.425	0.584	0.255
LTBP3	0.394	2.38025	1.82099	0.546	0.284	0.489	0.156
NEAT1	0.393	2.37421	1.57823	0.814	0.495	1.199	0.52
BPTF	0.39	2.35608	0.797662	0.845	0.83	1.218	0.818
ELL2	0.388	2.344	1.21173	0.784	0.618	0.957	0.492
HRC	0.388	2.344	1.38701	0.742	0.487	0.827	0.374
LSAMP	0.386	2.33192	1.23444	0.866	0.656	1.096	0.569
ANAPC16	0.385	2.32588	0.881522	0.814	0.765	1.012	0.634
CKM	0.385	2.32588	1.74314	0.763	0.405	1.31	0.528
CD47	0.384	2.31984	1.28616	0.773	0.554	0.869	0.421
FBXO32	0.384	2.31984	1.73701	0.711	0.329	0.953	0.357
PRKAA2	0.384	2.31984	1.16727	0.649	0.573	0.77	0.394
ZNF385B	0.384	2.31984	1.36524	0.649	0.466	0.827	0.379
PFKM	0.383	2.31379	0.704001	0.825	0.781	0.969	0.667
B3GALNT1	0.382	2.30775	1.27627	0.598	0.476	0.601	0.279
KLHL24	0.382	2.30775	1.29057	0.732	0.528	0.815	0.39
MITF	0.382	2.30775	1.26223	0.866	0.609	1.096	0.56
GULP1	0.381	2.30171	1.22571	0.732	0.546	0.701	0.342
TCAF1	0.381	2.30171	1.9256	0.557	0.096	0.601	0.184
BAZ2B	0.38	2.29567	0.897	0.773	0.767	1.106	0.695
ST3GAL1	0.38	2.29567	1.1905	0.804	0.601	0.92	0.476
TCEAL9	0.38	2.29567	1.98878	0.505	0.094	0.524	0.151
ACADVL	0.379	2.28963	0.8071	0.825	0.783	0.986	0.642
ETV1	0.379	2.28963	1.16202	0.866	0.699	1.185	0.65
FAM63B	0.378	2.28359	0.978854	0.67	0.607	0.711	0.404
OAZ2	0.377	2.27755	1.02934	0.887	0.748	1.045	0.605
ERCC-00043	0.375	2.26546	1.00626	0.887	0.765	1.054	0.619
ZNF827	0.375	2.26546	1.20242	0.742	0.636	0.929	0.478
CALCOCO1	0.374	2.25942	1.26515	0.66	0.489	0.603	0.282
MYBPC3	0.374	2.25942	1.09561	0.907	0.667	1.549	0.927
ZDHHC2	0.372	2.24734	1.06467	0.732	0.595	0.745	0.404
LINC00674	0.371	2.2413	0.70361	0.804	0.822	1.007	0.696
NEK7	0.371	2.2413	0.995654	0.794	0.671	0.864	0.497
ATP5D	0.369	2.22922	0.938703	0.887	0.751	0.999	0.605
ENO3	0.367	2.21713	1.06033	0.794	0.636	0.947	0.531
GPI	0.367	2.21713	0.689567	0.938	0.9	1.425	1.032
KCNIP2	0.367	2.21713	1.67246	0.701	0.301	0.894	0.344
DCAF11	0.366	2.21109	1.28844	0.629	0.462	0.56	0.256
ECI1	0.366	2.21109	0.968555	0.753	0.638	0.759	0.437
TFDP2	0.366	2.21109	1.17185	0.732	0.538	0.723	0.366
DST	0.365	2.20505	0.817936	0.814	0.777	1.175	0.777
NDUFA5	0.364	2.19901	0.813354	0.887	0.787	1.055	0.69
CRIP2	0.363	2.19297	0.646117	0.979	0.91	1.534	1.145
DKK1	0.363	2.19297	1.44013	0.742	0.591	1.828	0.956
CUX1	0.362	2.18693	0.74208	0.876	0.851	1.344	0.941
UQCRB	0.362	2.18693	0.957816	0.825	0.718	0.885	0.522
CCDC69	0.361	2.18089	1.37935	0.567	0.407	0.594	0.258
ADAM10	0.36	2.17485	1.51092	0.567	0.317	0.475	0.185
ARL5A	0.357	2.15672	0.577092	0.814	0.847	1.073	0.799
COL4A5	0.357	2.15672	0.626622	0.948	0.941	1.59	1.203
STT3B	0.357	2.15672	1.27358	0.701	0.519	0.795	0.383
FAM214A	0.356	2.15068	1.4397	0.567	0.372	0.546	0.226
KLHDC2	0.356	2.15068	1.00581	0.691	0.558	0.612	0.337
MLLT6	0.356	2.15068	1.12842	0.711	0.53	0.638	0.327
PIP4K2A	0.356	2.15068	0.912197	0.732	0.671	0.821	0.493
ETFB	0.355	2.14464	1.05021	0.763	0.607	0.78	0.429
PRDX2	0.355	2.14464	0.565517	0.948	0.937	1.539	1.194
PRKG1	0.355	2.14464	1.53989	0.639	0.346	0.619	0.244
CRYZ	0.353	2.13256	1.24048	0.701	0.542	0.725	0.352
ERCC-00042	0.353	2.13256	0.713826	0.979	0.961	1.644	1.199
ADD3	0.352	2.12652	0.857138	0.918	0.834	1.369	0.906
RBM8A	0.35	2.11443	0.933874	0.763	0.648	0.731	0.428
TMEM87A	0.35	2.11443	0.745956	0.887	0.802	1.203	0.829
HK1	0.349	2.10839	0.569455	0.948	0.902	1.371	1.049
SATB1	0.349	2.10839	1.51377	0.577	0.37	0.572	0.227
CBX6	0.347	2.09631	1.17391	0.784	0.581	0.809	0.415
ERCC-00111	0.345	2.08423	0.766502	0.938	0.924	1.341	0.927
GNAQ	0.345	2.08423	1.76897	0.526	0.213	0.496	0.164
HDAC5	0.345	2.08423	0.777046	0.68	0.648	0.701	0.449
LCLAT1	0.345	2.08423	1.21969	0.505	0.391	0.431	0.201
UQCRC2	0.345	2.08423	0.524921	0.907	0.881	1.246	0.966
BASP1	0.344	2.07819	0.558644	0.938	0.912	1.401	1.08
CACNB2	0.344	2.07819	0.968582	0.711	0.577	0.726	0.416
FEM1B	0.344	2.07819	1.64934	0.546	0.245	0.48	0.171
PNKD	0.344	2.07819	0.852847	0.825	0.673	0.816	0.507
SLC25A12	0.344	2.07819	1.1319	0.804	0.566	0.813	0.428
SLC25A37	0.344	2.07819	1.34484	0.598	0.401	0.523	0.229
SNTA1	0.344	2.07819	0.836683	0.835	0.763	1.052	0.679
SPEG	0.344	2.07819	0.839505	0.835	0.755	1.07	0.691
BNIP3	0.343	2.07214	0.925431	0.856	0.748	1.073	0.661
KLHDC3	0.343	2.07214	0.533004	0.938	0.957	1.447	1.133
EPM2AIP1	0.342	2.0661	0.584778	0.835	0.881	1.19	0.891
MDH1	0.342	2.0661	0.736414	1	0.941	2.041	1.521
RASL10B	0.342	2.0661	1.09103	0.835	0.581	0.848	0.46
PNISR	0.341	2.06006	0.638097	0.866	0.902	1.382	1.023
ADPRHL1	0.34	2.05402	1.31767	0.876	0.507	1.209	0.61
DCUN1D1	0.34	2.05402	1.23988	0.598	0.407	0.484	0.225
SYNPO2	0.34	2.05402	1.2495	0.732	0.483	0.801	0.392
TDP2	0.34	2.05402	0.868399	0.742	0.673	0.78	0.478
REEP3	0.339	2.04798	0.744029	0.784	0.732	0.875	0.583
TRIM44	0.339	2.04798	0.798722	0.794	0.781	0.946	0.616
ZC3H6	0.339	2.04798	1.4157	0.536	0.344	0.46	0.19
ABHD13	0.337	2.0359	1.23904	0.505	0.382	0.43	0.198
ARL6IP5	0.337	2.0359	0.495348	0.928	0.939	1.444	1.151
DPP8	0.337	2.0359	0.973265	0.639	0.581	0.609	0.342
ERCC-00145	0.336	2.02986	0.873506	0.938	0.845	1.135	0.725
MAST4	0.336	2.02986	1.34042	0.526	0.358	0.48	0.209
MAVS	0.335	2.02381	0.727837	0.691	0.734	0.813	0.543
BNIP2	0.333	2.01173	1.01222	0.567	0.528	0.569	0.31
FNIP2	0.333	2.01173	1.15339	0.68	0.569	0.766	0.395
GTF2F2	0.333	2.01173	1.02146	0.629	0.542	0.599	0.326
MLF1	0.333	2.01173	0.997587	0.649	0.573	0.699	0.392
NDUFB10	0.333	2.01173	0.753107	0.835	0.712	0.817	0.538
ATE1	0.332	2.00569	1.51837	0.515	0.292	0.437	0.168
ADCY6	0.331	1.99965	0.985609	0.649	0.552	0.628	0.351
JMJD1C	0.331	1.99965	0.772249	0.835	0.802	1.155	0.781
NME3	0.33	1.99361	1.35252	0.505	0.331	0.402	0.171
ARHGAP31	0.329	1.98757	1.32203	0.546	0.382	0.512	0.227
DOK6	0.329	1.98757	1.39456	0.526	0.331	0.517	0.219
NFIB	0.329	1.98757	1.10466	0.856	0.611	0.951	0.52
SPIN1	0.329	1.98757	0.754171	0.814	0.724	0.87	0.576
MARCH6	0.328	1.98153	0.568315	0.897	0.898	1.24	0.94
ECH1	0.326	1.96944	0.593918	0.918	0.904	1.273	0.955
THSD7A	0.326	1.96944	1.03219	0.856	0.658	1.066	0.618
PPP1R3C	0.325	1.9634	1.32955	0.608	0.387	0.649	0.294
SFRP1	0.325	1.9634	0.966986	0.928	0.847	1.775	1.163
ZNF91	0.325	1.9634	0.727468	0.742	0.74	0.877	0.59
SIX5	0.323	1.95132	0.953016	0.722	0.599	0.723	0.418
CEP350	0.322	1.94528	0.746222	0.66	0.652	0.726	0.475
FXYD6	0.322	1.94528	0.912566	0.753	0.699	0.957	0.585
UBL3	0.322	1.94528	1.04818	0.526	0.442	0.464	0.243
ERCC-00092	0.321	1.93924	1.01863	0.753	0.605	0.712	0.395
KANK1	0.321	1.93924	0.942624	0.773	0.675	0.905	0.54
KIDINS220	0.321	1.93924	0.491874	0.866	0.861	1.135	0.888
NFYC	0.321	1.93924	0.819934	0.701	0.65	0.672	0.418
ERCC-00076	0.32	1.9332	0.935256	0.701	0.656	0.73	0.427
FLJ10038	0.32	1.9332	1.41444	0.515	0.303	0.397	0.162
ERCC-00022	0.319	1.92715	1.00631	0.701	0.595	0.691	0.385
PPARGC1A	0.318	1.92111	1.06524	0.722	0.524	0.765	0.416
SOD2	0.318	1.92111	0.744633	0.639	0.644	0.663	0.431
UROD	0.318	1.92111	0.911131	0.639	0.53	0.532	0.307
PCM1	0.317	1.91507	0.619697	0.866	0.855	1.088	0.793
ATP5H	0.316	1.90903	0.50351	0.959	0.945	1.486	1.183
MAGEF1	0.316	1.90903	0.852003	0.68	0.644	0.702	0.43
SREK1IP1	0.316	1.90903	0.609269	0.701	0.708	0.75	0.533
WDR6	0.316	1.90903	0.723458	0.794	0.736	0.785	0.524
TMEM245	0.315	1.90299	0.550262	0.845	0.881	1.238	0.947
APP	0.314	1.89695	0.652962	0.969	0.945	1.629	1.221
DDX24	0.314	1.89695	0.493374	0.794	0.865	0.99	0.766
EFNB3	0.314	1.89695	1.10431	0.691	0.507	0.724	0.382
HADHB	0.314	1.89695	0.525371	0.866	0.836	0.995	0.757
ZFP36L2	0.314	1.89695	1.22324	0.619	0.436	0.617	0.297
AES	0.313	1.89091	0.497314	0.918	0.914	1.369	1.085
ARIH2	0.313	1.89091	0.605405	0.66	0.683	0.656	0.463
MAGI2-AS3	0.313	1.89091	0.790025	0.928	0.828	1.266	0.858
NFIA	0.313	1.89091	1.45986	0.567	0.29	0.662	0.277
RNF8	0.313	1.89091	0.922213	0.608	0.583	0.636	0.37
KIAA1191	0.312	1.88487	0.539386	0.804	0.857	1.002	0.757
RBM38	0.312	1.88487	1.07664	0.722	0.54	0.84	0.459
TMEM106B	0.312	1.88487	0.579853	0.794	0.818	0.99	0.731
PRDM6	0.312	1.88487	1.04965	0.567	0.474	0.629	0.338
NDUFB7	0.311	1.87882	0.74979	0.701	0.677	0.726	0.474
PIAS1	0.311	1.87882	0.996111	0.577	0.505	0.547	0.3
SOX4	0.311	1.87882	0.75025	0.948	0.916	2.041	1.512
SRSF6	0.311	1.87882	0.680168	0.825	0.783	0.914	0.634
TAF7	0.311	1.87882	0.546865	0.897	0.89	1.112	0.844
ZAK	0.311	1.87882	0.532136	0.948	0.916	1.615	1.279
EFNA1	0.31	1.87278	1.1001	0.526	0.417	0.473	0.24
TMOD1	0.31	1.87278	0.9758	0.577	0.493	0.582	0.325
CEP57	0.309	1.86674	0.794715	0.67	0.616	0.62	0.389
FRYL	0.309	1.86674	0.874107	0.577	0.542	0.56	0.332
NNT	0.309	1.86674	0.717035	0.784	0.748	0.986	0.675
AKAP9	0.308	1.8607	0.636298	0.845	0.822	1.157	0.841
ATF7IP	0.308	1.8607	0.827791	0.701	0.644	0.811	0.511
HIST1H2BK	0.308	1.8607	1.15778	0.639	0.425	0.6	0.3
IRF2BPL	0.308	1.8607	0.852517	0.722	0.642	0.732	0.45
MPHOSPH8	0.308	1.8607	0.69247	0.649	0.636	0.644	0.431
PCMTD1	0.308	1.8607	1.03817	0.619	0.538	0.63	0.341
SLC40A1	0.308	1.8607	1.28168	0.546	0.321	0.437	0.196
MYOM1	0.308	1.8607	0.787627	0.959	0.818	1.881	1.353
DAZAP2	0.307	1.85466	0.704501	0.629	0.675	0.693	0.463
EPB41L3	0.307	1.85466	0.564991	0.876	0.849	1.112	0.836
GAB1	0.307	1.85466	0.813409	0.649	0.63	0.699	0.438
ANKRD26	0.306	1.84862	0.865556	0.722	0.597	0.671	0.406
MDM4	0.306	1.84862	0.747951	0.835	0.73	0.812	0.536
MMP15	0.306	1.84862	0.836545	0.711	0.613	0.702	0.434
NAA60	0.306	1.84862	1.02556	0.515	0.413	0.419	0.221
PROS1	0.306	1.84862	0.926228	0.577	0.53	0.548	0.314
C6orf48	0.305	1.84258	0.595413	0.918	0.853	1.064	0.784
INPPL1	0.305	1.84258	0.914805	0.66	0.55	0.578	0.335
PSME1	0.305	1.84258	0.760795	0.732	0.654	0.719	0.466
SSBP3	0.305	1.84258	0.853646	0.794	0.706	0.893	0.56
ZBTB4	0.305	1.84258	0.972693	0.567	0.468	0.481	0.265
BOD1L1	0.304	1.83654	0.798042	0.691	0.65	0.774	0.494
CES2	0.304	1.83654	0.786437	0.608	0.589	0.623	0.393
HOMER1	0.304	1.83654	0.928117	0.649	0.517	0.6	0.346
R3HDM2	0.304	1.83654	0.914587	0.598	0.515	0.525	0.302
VPS8	0.304	1.83654	0.965058	0.588	0.491	0.524	0.292
CRIPT	0.303	1.83049	1.00122	0.577	0.47	0.484	0.262
PSD3	0.303	1.83049	0.903351	0.763	0.638	0.878	0.534
ATRAID	0.302	1.82445	0.605589	0.753	0.746	0.789	0.564
CORO6	0.302	1.82445	0.728155	0.732	0.677	0.861	0.578
CYP20A1	0.302	1.82445	0.818138	0.505	0.528	0.487	0.296
MANBA	0.302	1.82445	0.955764	0.515	0.431	0.451	0.25
TNRC6B	0.302	1.82445	0.596255	0.835	0.828	1.042	0.766
TSC22D1	0.302	1.82445	0.583567	0.979	0.941	1.651	1.28
UPF3A	0.302	1.82445	0.542772	0.67	0.679	0.685	0.503
ACVR2B	0.301	1.81841	0.77355	0.649	0.607	0.652	0.416
CD59	0.301	1.81841	0.498568	0.825	0.873	1.16	0.906
HDAC9	0.301	1.81841	1.00255	0.691	0.503	0.634	0.351
SUN1	0.301	1.81841	0.762217	0.68	0.654	0.645	0.414
VEGFC	0.301	1.81841	1.12503	0.577	0.415	0.58	0.295
OBSL1	0.3	1.81237	0.609168	0.866	0.814	0.992	0.721
RBM24	0.3	1.81237	0.508746	0.938	0.877	1.434	1.135
CXXC5	0.299	1.80633	1.32227	0.526	0.37	0.579	0.26
KIAA1456	0.299	1.80633	1.04868	0.567	0.417	0.473	0.248
USP19	0.299	1.80633	0.770488	0.505	0.517	0.472	0.295
COPS7A	0.298	1.80029	0.841897	0.588	0.515	0.511	0.307
LRBA	0.298	1.80029	0.783584	0.619	0.581	0.622	0.393
NDUFB4	0.298	1.80029	0.530607	0.907	0.89	1.131	0.867
EPHA7	0.297	1.79425	1.15759	0.598	0.417	0.627	0.315
FBXO18	0.297	1.79425	0.73708	0.711	0.689	0.749	0.494
SLC8A1	0.297	1.79425	0.619275	0.959	0.965	2.01	1.571
TSC22D4	0.297	1.79425	0.966219	0.536	0.483	0.531	0.296
UQCR10	0.297	1.79425	0.594469	0.907	0.861	1.155	0.858
ARFGAP2	0.296	1.78821	0.754339	0.485	0.519	0.472	0.298
CITED4	0.296	1.78821	1.11023	0.619	0.446	0.614	0.317
ZNHIT3	0.296	1.78821	1.03336	0.546	0.47	0.488	0.259
EIF3E	0.295	1.78216	0.506952	0.979	0.953	1.573	1.257
MRPS25	0.295	1.78216	0.812018	0.546	0.519	0.476	0.29
NDUFB5	0.295	1.78216	0.437664	0.897	0.935	1.279	1.038
UQCR11	0.295	1.78216	0.568074	0.835	0.822	0.948	0.702
ITGB1BP2	0.294	1.77612	0.965095	0.608	0.483	0.585	0.329
MAP2K4	0.294	1.77612	0.614645	0.804	0.746	0.828	0.591
PRDX4	0.294	1.77612	0.787438	0.763	0.679	0.781	0.502
CLK1	0.293	1.77008	0.801095	0.546	0.53	0.502	0.309
DCAF6	0.293	1.77008	0.686689	0.546	0.544	0.528	0.35
RAB21	0.293	1.77008	0.706367	0.68	0.64	0.642	0.426
TULP3	0.293	1.77008	0.892844	0.577	0.517	0.52	0.303
GNA11	0.292	1.76404	1.25395	0.515	0.344	0.448	0.205
MLLT1	0.292	1.76404	0.541331	0.722	0.779	0.848	0.632
PTOV1	0.292	1.76404	0.541161	0.856	0.849	0.982	0.74
ANKRD10	0.291	1.758	0.867396	0.608	0.564	0.609	0.365
CYB5A	0.291	1.758	0.904246	0.567	0.546	0.565	0.329
RCOR3	0.291	1.758	0.886335	0.515	0.438	0.418	0.241
RNF207	0.29	1.75196	1.11197	0.608	0.393	0.511	0.259
VEGFB	0.29	1.75196	0.634868	0.784	0.742	0.863	0.611
SPATA20	0.289	1.74592	0.80183	0.557	0.511	0.49	0.301
HIGD2A	0.288	1.73988	0.556562	0.722	0.773	0.808	0.595
ARGLU1	0.287	1.73384	0.596103	0.825	0.785	0.935	0.681
BIVM	0.287	1.73384	0.864449	0.577	0.515	0.502	0.297
C6orf89	0.287	1.73384	1.0099	0.598	0.436	0.464	0.249
VEZF1	0.287	1.73384	0.571163	0.691	0.734	0.745	0.541
GOT1	0.286	1.72779	0.6716	0.856	0.796	1.169	0.835
HIBCH	0.286	1.72779	0.594755	0.598	0.636	0.533	0.374
BLCAP	0.285	1.72175	0.721761	0.588	0.589	0.572	0.373
C14orf159	0.285	1.72175	1.04632	0.567	0.409	0.497	0.262
USP16	0.285	1.72175	0.809377	0.526	0.491	0.466	0.284
ZNF362	0.285	1.72175	0.910411	0.588	0.519	0.594	0.346
ARFGEF2	0.283	1.70967	0.653517	0.598	0.611	0.575	0.391
ERCC-00060	0.283	1.70967	0.563221	0.969	0.978	1.534	1.191
PIAS2	0.283	1.70967	0.809243	0.619	0.536	0.544	0.335
PAGR1	0.282	1.70363	0.814982	0.546	0.485	0.466	0.283
TOPORS	0.282	1.70363	0.806815	0.515	0.519	0.473	0.289
ATPIF1	0.281	1.69759	0.516606	0.866	0.838	1.021	0.782
NRSN2	0.281	1.69759	0.756105	0.567	0.513	0.456	0.287
GPC1	0.28	1.69155	0.783192	0.608	0.575	0.585	0.368
LIMCH1	0.28	1.69155	0.608423	0.794	0.732	1.042	0.761
LMO4	0.28	1.69155	0.631021	0.763	0.775	1.008	0.725
MYCBP2	0.28	1.69155	0.7186	0.608	0.607	0.69	0.457
OBSCN	0.28	1.69155	0.882669	0.515	0.431	0.404	0.233
PDGFRA	0.28	1.69155	0.567982	0.722	0.771	1.03	0.768
TCEB2	0.28	1.69155	0.431565	0.845	0.861	0.962	0.768
TNRC18	0.28	1.69155	0.871259	0.67	0.511	0.534	0.316
CCNL1	0.279	1.68551	0.526281	0.629	0.654	0.607	0.447
NBR1	0.279	1.68551	0.552448	0.649	0.669	0.668	0.487
PPCS	0.279	1.68551	0.92741	0.526	0.444	0.465	0.263
ZMYND8	0.279	1.68551	0.674175	0.691	0.642	0.751	0.514
CHKA	0.278	1.67946	0.573518	0.701	0.693	0.698	0.504
PPP1R3B	0.278	1.67946	1.04245	0.536	0.38	0.434	0.227
SPAG7	0.278	1.67946	0.419221	0.784	0.775	0.795	0.632
FHL2	0.277	1.67342	0.940962	0.577	0.452	0.577	0.329
PRRC2A	0.277	1.67342	0.539447	0.66	0.697	0.64	0.469
STX16	0.277	1.67342	0.600241	0.649	0.667	0.674	0.478
AGPAT1	0.276	1.66738	0.830164	0.505	0.481	0.442	0.265
APPL1	0.276	1.66738	0.635935	0.505	0.554	0.482	0.328
ATP5I	0.276	1.66738	0.672436	0.773	0.699	0.753	0.516
C2orf68	0.276	1.66738	0.877769	0.505	0.472	0.474	0.277
FOXN3	0.276	1.66738	0.548448	0.804	0.798	0.993	0.746
MICAL3	0.276	1.66738	0.785661	0.598	0.558	0.568	0.356
ZC2HC1A	0.276	1.66738	0.579665	0.742	0.72	0.782	0.567
ASH1L	0.275	1.66134	0.565131	0.639	0.722	0.749	0.546
LRRC47	0.275	1.66134	0.491768	0.505	0.546	0.436	0.323
MAPKBP1	0.275	1.66134	0.956291	0.515	0.417	0.441	0.244
ALKBH5	0.274	1.6553	0.550122	0.773	0.81	0.872	0.648
GGNBP2	0.274	1.6553	0.422099	0.649	0.712	0.643	0.505
LBH	0.274	1.6553	0.793087	0.753	0.648	0.935	0.61
RB1CC1	0.274	1.6553	0.496228	0.639	0.732	0.775	0.589
SYNGR2	0.274	1.6553	0.763534	0.495	0.501	0.455	0.285
YIPF3	0.274	1.6553	0.616298	0.701	0.677	0.664	0.466
ZBTB44	0.274	1.6553	0.807901	0.536	0.472	0.481	0.294
ZNF292	0.274	1.6553	0.679541	0.742	0.679	0.787	0.539
DCAF7	0.273	1.64926	0.45446	0.814	0.836	0.947	0.746
EVL	0.273	1.64926	0.815174	0.577	0.55	0.523	0.32
MTUS1	0.273	1.64926	1.10385	0.526	0.346	0.532	0.272
N4BP2L2	0.273	1.64926	0.531918	0.722	0.73	0.766	0.57
RPRD2	0.273	1.64926	0.735653	0.608	0.603	0.591	0.383
CTBP2	0.272	1.64322	0.453757	0.742	0.812	0.955	0.753
DLG3	0.272	1.64322	0.824647	0.557	0.474	0.464	0.28
FZD3	0.272	1.64322	0.60819	0.608	0.607	0.59	0.413
KIFAP3	0.272	1.64322	0.463532	0.68	0.761	0.86	0.67
PHF1	0.272	1.64322	0.552321	0.577	0.597	0.524	0.377
PTGES3L	0.272	1.64322	0.78992	0.505	0.489	0.453	0.279
TNNI3	0.272	1.64322	1.05617	0.763	0.411	0.945	0.531
WRNIP1	0.272	1.64322	0.71132	0.536	0.513	0.444	0.287
ASXL1	0.271	1.63718	0.441965	0.454	0.566	0.451	0.345
B2M	0.271	1.63718	0.486246	0.887	0.865	1.165	0.916
BBX	0.271	1.63718	0.463474	0.804	0.814	1.005	0.791
DNAJC19	0.271	1.63718	0.746777	0.474	0.505	0.437	0.276
MAGI2	0.271	1.63718	1.0075	0.515	0.372	0.425	0.227
MECP2	0.271	1.63718	0.639018	0.619	0.63	0.573	0.393
PKIG	0.271	1.63718	0.854039	0.619	0.556	0.586	0.353
RPAIN	0.271	1.63718	0.639782	0.629	0.622	0.576	0.395
ST3GAL2	0.271	1.63718	0.842848	0.515	0.46	0.458	0.273
ZDHHC21	0.271	1.63718	0.765217	0.546	0.499	0.463	0.29
ZNF395	0.271	1.63718	0.848995	0.536	0.491	0.466	0.277
FOXP1	0.27	1.63113	0.549864	0.918	0.861	1.221	0.933
GMPR2	0.27	1.63113	0.772919	0.526	0.454	0.421	0.261
NGRN	0.27	1.63113	0.420554	0.814	0.849	0.959	0.77
ANK2	0.269	1.62509	0.802495	0.67	0.552	0.575	0.357
ANKRD20A9P	0.269	1.62509	0.523588	0.691	0.761	0.726	0.541
CRYAB	0.269	1.62509	0.695107	0.969	0.832	1.793	1.335
FIS1	0.269	1.62509	0.608479	0.639	0.667	0.582	0.407
GAMT	0.269	1.62509	0.812755	0.505	0.491	0.487	0.297
IREB2	0.269	1.62509	0.502823	0.639	0.677	0.613	0.458
MYO9A	0.269	1.62509	0.812433	0.567	0.491	0.456	0.277
NDUFAF3	0.269	1.62509	0.54866	0.567	0.601	0.507	0.365
SIRPA	0.269	1.62509	0.654479	0.474	0.524	0.514	0.347
TAB2	0.269	1.62509	0.506302	0.784	0.765	0.758	0.572
ASCC1	0.268	1.61905	0.597789	0.546	0.595	0.538	0.377
CIR1	0.268	1.61905	0.728452	0.567	0.513	0.453	0.29
GBAS	0.268	1.61905	0.402482	0.825	0.855	0.991	0.805
MTFR1L	0.268	1.61905	0.641034	0.649	0.638	0.597	0.41
NDUFB1	0.268	1.61905	0.689493	0.629	0.622	0.622	0.416
PEAK1	0.268	1.61905	0.587378	0.619	0.593	0.567	0.401
SNX1	0.268	1.61905	0.635277	0.577	0.566	0.486	0.331
TIMM13	0.268	1.61905	0.742546	0.608	0.532	0.488	0.311
TNRC6A	0.268	1.61905	0.428162	0.67	0.734	0.706	0.555
CDC14B	0.267	1.61301	0.615562	0.629	0.613	0.583	0.406
CPSF6	0.267	1.61301	0.540261	0.66	0.663	0.639	0.468
FAM20B	0.267	1.61301	0.746793	0.526	0.499	0.446	0.282
LONP2	0.267	1.61301	0.578547	0.454	0.507	0.41	0.287
NCOA1	0.267	1.61301	0.635709	0.773	0.718	0.778	0.546
NFE2L1	0.267	1.61301	0.613785	0.732	0.72	0.782	0.556
RBMS1	0.266	1.60697	0.470483	0.856	0.875	1.101	0.869
SFPQ	0.266	1.60697	0.498169	0.938	0.881	1.22	0.957
SNX2	0.266	1.60697	0.58078	0.639	0.652	0.651	0.466
PDHX	0.265	1.60093	0.723346	0.546	0.524	0.459	0.295
SLC7A2	0.265	1.60093	0.601309	0.701	0.732	0.898	0.65
IVD	0.264	1.59489	0.608542	0.536	0.548	0.466	0.322
JAG1	0.264	1.59489	0.476314	0.835	0.867	1.084	0.852
KLHL7	0.264	1.59489	0.70881	0.598	0.562	0.542	0.355
NKIRAS2	0.264	1.59489	0.54174	0.649	0.665	0.624	0.456
PPP1R21	0.264	1.59489	0.824777	0.536	0.505	0.509	0.309
SREK1	0.264	1.59489	0.44385	0.722	0.767	0.791	0.62
ZRANB1	0.264	1.59489	0.636392	0.619	0.622	0.579	0.398
ATM	0.263	1.58885	0.606137	0.732	0.671	0.704	0.499
PBX2	0.263	1.58885	0.730645	0.505	0.534	0.511	0.329
RBM39	0.263	1.58885	0.404501	0.876	0.863	1.08	0.881
ZBED5	0.263	1.58885	0.628929	0.629	0.607	0.582	0.402
FGFR2	0.262	1.5828	0.755681	0.701	0.618	0.765	0.5
KIF3B	0.262	1.5828	0.642322	0.526	0.548	0.474	0.321
RPL13A	0.262	1.5828	0.444094	0.959	0.918	1.456	1.19
THEM4	0.262	1.5828	0.755113	0.577	0.532	0.505	0.32
TTC14	0.262	1.5828	0.850512	0.546	0.436	0.468	0.278
UBR1	0.262	1.5828	0.485107	0.505	0.613	0.532	0.399
ARID2	0.261	1.57676	0.488926	0.691	0.712	0.741	0.564
CDC73	0.261	1.57676	0.608479	0.588	0.622	0.582	0.407
IFT57	0.261	1.57676	0.662932	0.598	0.581	0.532	0.358
NAV2	0.261	1.57676	0.805627	0.577	0.524	0.564	0.349
STK39	0.261	1.57676	0.564455	0.68	0.683	0.732	0.533
STRN	0.261	1.57676	0.583856	0.814	0.793	0.938	0.688
TXN2	0.261	1.57676	0.464306	0.701	0.708	0.667	0.512
ZNF358	0.261	1.57676	0.652363	0.505	0.503	0.44	0.295
CDK13	0.26	1.57072	0.602843	0.598	0.609	0.545	0.381
DYRK4	0.26	1.57072	0.627129	0.526	0.519	0.46	0.314
IGBP1	0.26	1.57072	0.612153	0.608	0.636	0.625	0.438
KIAA0319L	0.26	1.57072	0.489998	0.732	0.712	0.659	0.498
VWDE	0.26	1.57072	0.554899	0.856	0.787	1.267	0.969
CDIPT	0.259	1.56468	0.528882	0.773	0.775	0.83	0.622
COMMD6	0.259	1.56468	0.406566	0.639	0.706	0.612	0.484
FBXO11	0.259	1.56468	0.532299	0.649	0.691	0.658	0.485
FRMD4B	0.259	1.56468	0.501435	0.876	0.859	1.19	0.93
GSTM4	0.259	1.56468	0.685599	0.567	0.569	0.58	0.387
HECTD4	0.259	1.56468	0.564317	0.557	0.591	0.521	0.372
RNF216	0.259	1.56468	0.498249	0.515	0.601	0.5	0.371
SLC38A10	0.259	1.56468	0.773548	0.546	0.47	0.441	0.274
SMO	0.259	1.56468	0.712564	0.557	0.519	0.459	0.297
UNC5B	0.259	1.56468	0.489146	0.907	0.885	1.306	1.035
HMBOX1	0.258	1.55864	0.63538	0.546	0.579	0.493	0.336
LAMTOR3	0.258	1.55864	0.700858	0.526	0.495	0.431	0.28
LPGAT1	0.258	1.55864	0.509369	0.649	0.718	0.768	0.579
SLC25A4	0.258	1.55864	0.573876	0.969	0.896	1.78	1.398
SUPT4H1	0.258	1.55864	0.445741	0.67	0.738	0.638	0.494
TSPYL4	0.258	1.55864	0.602262	0.619	0.62	0.557	0.39
FAM8A1	0.257	1.5526	0.654558	0.454	0.501	0.442	0.296
PARD3	0.257	1.5526	0.561215	0.546	0.587	0.54	0.387
SLC25A11	0.257	1.5526	0.688911	0.701	0.591	0.619	0.414
SYNGR1	0.257	1.5526	0.710864	0.526	0.511	0.46	0.298
VPS39	0.257	1.5526	0.75629	0.515	0.493	0.441	0.277
CACUL1	0.256	1.54656	0.431849	0.701	0.751	0.705	0.553
CLUAP1	0.256	1.54656	0.79509	0.515	0.472	0.422	0.258
DNAJB2	0.256	1.54656	0.75525	0.515	0.47	0.412	0.258
H1F0	0.256	1.54656	0.718338	0.608	0.599	0.635	0.418
IDH3B	0.256	1.54656	0.538556	0.639	0.65	0.619	0.453
IL11RA	0.256	1.54656	0.884159	0.526	0.415	0.437	0.253
MAP2K2	0.256	1.54656	0.508109	0.557	0.609	0.499	0.368
MCRS1	0.256	1.54656	0.572561	0.639	0.646	0.598	0.428
SRSF5	0.256	1.54656	0.550853	0.753	0.734	0.756	0.556
CHMP2A	0.255	1.54052	0.575809	0.732	0.687	0.661	0.475
GCC2	0.255	1.54052	0.482742	0.608	0.661	0.63	0.477
MAP9	0.255	1.54052	0.509329	0.567	0.624	0.573	0.425
PIGS	0.255	1.54052	0.551717	0.691	0.658	0.621	0.451
USF2	0.255	1.54052	0.667984	0.619	0.569	0.511	0.342
ZNF518A	0.255	1.54052	0.484913	0.505	0.599	0.523	0.392
EFR3A	0.254	1.53447	0.611656	0.619	0.605	0.606	0.424
KANSL1	0.254	1.53447	0.697287	0.526	0.503	0.433	0.282
SIRT2	0.254	1.53447	0.663949	0.629	0.583	0.584	0.395
SLC22A17	0.254	1.53447	0.599781	0.67	0.683	0.754	0.539
TYW3	0.254	1.53447	0.588587	0.557	0.585	0.523	0.368
DCAF10	0.253	1.52843	0.677981	0.577	0.569	0.555	0.371
DIS3	0.253	1.52843	0.476301	0.505	0.581	0.468	0.351
FAM134A	0.253	1.52843	0.677047	0.526	0.499	0.435	0.287
GPS1	0.253	1.52843	0.474423	0.639	0.687	0.607	0.461
LARP7	0.253	1.52843	0.531475	0.711	0.663	0.65	0.479
RASSF8	0.253	1.52843	0.726676	0.536	0.474	0.454	0.291
ZNF33A	0.253	1.52843	0.722476	0.536	0.517	0.472	0.304
SMPX	0.253	1.52843	0.633367	0.959	0.791	1.503	1.126
FAM217B	0.252	1.52239	0.638171	0.474	0.503	0.456	0.309
HCN1	0.252	1.52239	0.842594	0.619	0.479	0.573	0.347
NDUFA13	0.252	1.52239	0.406011	0.794	0.828	0.838	0.673
BTAF1	0.251	1.51635	0.542447	0.557	0.583	0.521	0.377
CCDC141	0.251	1.51635	0.587356	0.845	0.779	1.092	0.81
CREBBP	0.251	1.51635	0.52151	0.66	0.683	0.677	0.503
ERCC-00095	0.251	1.51635	0.70604	0.598	0.589	0.544	0.357
LHFP	0.251	1.51635	0.619138	0.742	0.724	0.914	0.656
MAF1	0.251	1.51635	0.546378	0.577	0.591	0.505	0.364
PPM1K	0.251	1.51635	0.552627	0.649	0.65	0.758	0.557
HINT3	0.25	1.51031	0.483278	0.557	0.597	0.511	0.383
LMTK2	0.25	1.51031	0.486526	0.485	0.579	0.445	0.331
MRPL40	0.25	1.51031	0.689031	0.505	0.495	0.409	0.267
PHACTR4	0.25	1.51031	0.427712	0.649	0.71	0.656	0.514
WDR59	0.25	1.51031	0.679648	0.505	0.479	0.427	0.281
ANKS1A	0.249	1.50427	0.818085	0.515	0.434	0.431	0.26
CUEDC2	0.249	1.50427	0.529054	0.629	0.64	0.547	0.4
MBD1	0.249	1.50427	0.461477	0.464	0.556	0.432	0.326
TRIM2	0.249	1.50427	0.764092	0.505	0.438	0.437	0.273
DMPK	0.248	1.49823	0.570672	0.639	0.607	0.6	0.43
HIPK1	0.248	1.49823	0.544556	0.608	0.609	0.519	0.375
MLLT3	0.248	1.49823	0.840075	0.567	0.427	0.498	0.299
SLC4A1AP	0.248	1.49823	0.542702	0.505	0.521	0.416	0.298
APOOL	0.247	1.49219	0.527788	0.588	0.611	0.57	0.418
ASCC2	0.247	1.49219	0.499233	0.546	0.573	0.464	0.343
EFEMP2	0.247	1.49219	0.484774	0.588	0.626	0.537	0.403
GPR108	0.247	1.49219	0.683211	0.577	0.53	0.487	0.322
MRPS5	0.247	1.49219	0.468861	0.567	0.609	0.494	0.373
NIN	0.247	1.49219	0.618377	0.619	0.587	0.554	0.384
SMAD9	0.247	1.49219	0.684802	0.567	0.521	0.526	0.349
STAU2	0.247	1.49219	0.525382	0.526	0.571	0.508	0.371
VLDLR	0.247	1.49219	0.651404	0.546	0.544	0.541	0.367
CRBN	0.246	1.48614	0.580361	0.557	0.526	0.48	0.338
HELZ	0.246	1.48614	0.479428	0.619	0.665	0.562	0.424
IFT81	0.246	1.48614	0.639323	0.505	0.47	0.404	0.272
SHISA2	0.246	1.48614	0.775231	0.66	0.538	0.821	0.534
MYL6B	0.245	1.4801	0.519482	0.588	0.616	0.531	0.39
NDUFB3	0.245	1.4801	0.406487	0.814	0.83	0.863	0.694
TCF25	0.245	1.4801	0.431347	0.701	0.708	0.65	0.508
ZCCHC11	0.245	1.4801	0.411388	0.619	0.683	0.582	0.458
AGGF1	0.244	1.47406	0.409363	0.536	0.624	0.477	0.373
CAMK2G	0.244	1.47406	0.50399	0.588	0.63	0.543	0.403
CXXC4	0.244	1.47406	0.758683	0.567	0.47	0.512	0.324
DCAF8	0.244	1.47406	0.588129	0.629	0.591	0.535	0.377
NUBP2	0.244	1.47406	0.527671	0.526	0.579	0.46	0.334
SUCO	0.244	1.47406	0.452843	0.701	0.687	0.664	0.513
TMEM9	0.244	1.47406	0.422297	0.598	0.644	0.529	0.412
ZKSCAN1	0.244	1.47406	0.563274	0.753	0.691	0.779	0.57
HAND2	0.244	1.47406	0.405749	0.948	0.904	1.54	1.287
C6orf120	0.243	1.46802	0.604141	0.505	0.528	0.451	0.312
CADM1	0.243	1.46802	0.668012	0.794	0.656	0.997	0.702
COX5B	0.243	1.46802	0.40638	0.959	0.928	1.376	1.14
CPE	0.243	1.46802	0.454304	0.814	0.832	1.117	0.89
ELMOD2	0.243	1.46802	0.585428	0.423	0.524	0.446	0.312
GSN	0.243	1.46802	0.752742	0.536	0.454	0.482	0.305
MT-TK	0.243	1.46802	0.479769	0.639	0.679	0.669	0.509
NAPA	0.243	1.46802	0.546026	0.536	0.544	0.445	0.319
SPOP	0.243	1.46802	0.455446	0.639	0.663	0.603	0.463
SYNE2	0.243	1.46802	0.54945	0.773	0.744	1.072	0.81
TRIP11	0.243	1.46802	0.534363	0.515	0.536	0.483	0.35
CMYA5	0.242	1.46198	0.474992	0.979	0.914	1.936	1.601
CTDSP2	0.242	1.46198	0.47901	0.753	0.775	0.79	0.607
IRGQ	0.242	1.46198	0.54713	0.546	0.56	0.46	0.33
MAGI1	0.242	1.46198	0.548342	0.629	0.603	0.561	0.406
NDUFS8	0.242	1.46198	0.480394	0.649	0.658	0.542	0.408
MAPRE2	0.241	1.45594	0.533894	0.649	0.683	0.665	0.49
ZFYVE21	0.241	1.45594	0.558801	0.619	0.579	0.518	0.371
ARHGEF12	0.24	1.4499	0.438874	0.598	0.658	0.585	0.453
CD2BP2	0.24	1.4499	0.422175	0.443	0.554	0.388	0.299
CISD1	0.24	1.4499	0.443064	0.701	0.722	0.741	0.579
KIF21A	0.239	1.44386	0.42733	0.598	0.675	0.64	0.501
NDUFS7	0.239	1.44386	0.497796	0.619	0.618	0.559	0.417
PREPL	0.239	1.44386	0.490701	0.629	0.648	0.558	0.418
APBB1	0.238	1.43781	0.405481	0.588	0.642	0.541	0.426
CCDC8	0.238	1.43781	0.587112	0.536	0.501	0.43	0.3
DLC1	0.238	1.43781	0.601196	0.567	0.538	0.589	0.414
DNAJC5	0.238	1.43781	0.525366	0.485	0.501	0.381	0.275
TSG101	0.238	1.43781	0.408645	0.701	0.685	0.603	0.476
MRPL10	0.237	1.43177	0.435794	0.577	0.605	0.497	0.383
MUS81	0.237	1.43177	0.62867	0.495	0.513	0.431	0.293
PPM1A	0.237	1.43177	0.408045	0.567	0.638	0.532	0.418
AK1	0.236	1.42573	0.485107	0.588	0.609	0.532	0.399
BMPR2	0.236	1.42573	0.402953	0.753	0.785	0.872	0.703
CWC27	0.236	1.42573	0.477325	0.495	0.583	0.467	0.35
FAHD1	0.236	1.42573	0.527143	0.546	0.558	0.477	0.347
FBLIM1	0.236	1.42573	0.55435	0.67	0.636	0.67	0.488
GAPVD1	0.236	1.42573	0.422297	0.577	0.622	0.529	0.412
GATAD1	0.236	1.42573	0.476365	0.67	0.671	0.629	0.478
PELP1	0.236	1.42573	0.499982	0.495	0.546	0.429	0.316
PHF3	0.236	1.42573	0.45282	0.68	0.681	0.68	0.526
SEMA5A	0.236	1.42573	0.58897	0.794	0.671	0.905	0.66
ATXN1	0.235	1.41969	0.446632	0.742	0.732	0.74	0.577
BCL2L13	0.235	1.41969	0.40957	0.546	0.62	0.482	0.377
UBL7	0.235	1.41969	0.563134	0.536	0.552	0.459	0.326
CLASP1	0.234	1.41365	0.465909	0.598	0.652	0.574	0.437
FBXO38	0.234	1.41365	0.494494	0.464	0.538	0.408	0.301
GOLPH3	0.234	1.41365	0.425474	0.557	0.599	0.494	0.383
GOPC	0.234	1.41365	0.481262	0.608	0.626	0.541	0.407
GTF2F1	0.234	1.41365	0.480232	0.536	0.544	0.433	0.323
TTC17	0.234	1.41365	0.407707	0.711	0.703	0.633	0.501
ZNF711	0.234	1.41365	0.537357	0.588	0.613	0.564	0.411
AKT2	0.233	1.40761	0.524891	0.526	0.548	0.45	0.327
PDXK	0.233	1.40761	0.459596	0.474	0.534	0.42	0.317
PRKAR2B	0.233	1.40761	0.627428	0.598	0.542	0.606	0.42
SYNJ2BP	0.233	1.40761	0.404461	0.608	0.679	0.587	0.464
ZNF618	0.233	1.40761	0.458751	0.639	0.667	0.66	0.508
MOCS2	0.232	1.40157	0.535945	0.526	0.544	0.441	0.318
WASL	0.232	1.40157	0.476371	0.536	0.554	0.432	0.323
MYO18B	0.232	1.40157	0.432602	0.639	0.644	0.61	0.475
CERK	0.231	1.39553	0.493318	0.536	0.587	0.452	0.335
ICMT	0.231	1.39553	0.552692	0.515	0.505	0.405	0.288
IFI27L2	0.231	1.39553	0.514439	0.546	0.542	0.438	0.32
LOC100506548	0.231	1.39553	0.406824	0.66	0.681	0.623	0.493
SLK	0.231	1.39553	0.527216	0.619	0.593	0.575	0.422
SRF	0.231	1.39553	0.496029	0.784	0.761	0.904	0.694
SSPN	0.231	1.39553	0.522556	0.515	0.583	0.567	0.417
TRAPPC4	0.231	1.39553	0.462779	0.608	0.661	0.583	0.445
UNC45B	0.231	1.39553	0.427995	0.876	0.824	1.303	1.064
PET100	0.23	1.38948	0.429345	0.577	0.64	0.52	0.403
RANBP3	0.23	1.38948	0.487118	0.526	0.53	0.414	0.307
UBXN1	0.23	1.38948	0.508419	0.546	0.575	0.46	0.338
DNAJB14	0.229	1.38344	0.482772	0.495	0.54	0.422	0.314
GIGYF1	0.229	1.38344	0.482772	0.485	0.538	0.422	0.314
LDB3	0.229	1.38344	0.614624	0.866	0.722	1.479	1.116
MCM3AP	0.229	1.38344	0.433908	0.526	0.566	0.435	0.334
PLAG1	0.229	1.38344	0.642322	0.505	0.466	0.474	0.321
PTH1R	0.229	1.38344	0.492682	0.423	0.511	0.418	0.309
ALDH2	0.228	1.3774	0.409226	0.608	0.622	0.525	0.412
DCTN6	0.228	1.3774	0.410549	0.588	0.638	0.534	0.419
FAM208A	0.228	1.3774	0.420011	0.619	0.663	0.613	0.481
UBE4A	0.228	1.3774	0.491831	0.536	0.521	0.423	0.313
VWA8	0.228	1.3774	0.481542	0.557	0.552	0.49	0.367
FOXJ3	0.227	1.37136	0.535945	0.474	0.534	0.441	0.318
KRT10	0.227	1.37136	0.426063	0.567	0.562	0.448	0.346
AGL	0.226	1.36532	0.561351	0.577	0.566	0.548	0.393
ERI3	0.226	1.36532	0.50353	0.505	0.556	0.443	0.326
GSTK1	0.226	1.36532	0.42105	0.701	0.695	0.656	0.516
LYRM7	0.226	1.36532	0.492998	0.557	0.595	0.537	0.401
MPC2	0.226	1.36532	0.419991	0.526	0.593	0.48	0.373
NRBP1	0.226	1.36532	0.448927	0.505	0.573	0.444	0.338
PTPRK	0.226	1.36532	0.404285	0.742	0.759	0.778	0.623
AHDC1	0.225	1.35928	0.567321	0.526	0.501	0.429	0.303
AKAP11	0.225	1.35928	0.461327	0.464	0.534	0.423	0.319
DDX52	0.225	1.35928	0.465977	0.485	0.505	0.392	0.294
DGKD	0.225	1.35928	0.550213	0.505	0.513	0.43	0.307
FAM78A	0.225	1.35928	0.567786	0.515	0.481	0.506	0.36
MAPK14	0.225	1.35928	0.587154	0.536	0.485	0.408	0.284
FAM162A	0.224	1.35324	0.410076	0.629	0.679	0.652	0.516
MGARP	0.224	1.35324	0.669868	0.567	0.47	0.579	0.39
MT-TI	0.224	1.35324	0.535972	0.505	0.485	0.445	0.321
RSF1	0.224	1.35324	0.404034	0.619	0.642	0.599	0.474
TP53BP2	0.224	1.35324	0.465056	0.588	0.585	0.484	0.366
MT-TL1	0.223	1.3472	0.478402	0.515	0.548	0.475	0.356
TAF11	0.223	1.3472	0.415853	0.454	0.521	0.384	0.297
ERBB4	0.222	1.34115	0.523124	0.474	0.519	0.523	0.383
HAX1	0.222	1.34115	0.424456	0.557	0.556	0.42	0.324
SNAP29	0.222	1.34115	0.434756	0.505	0.55	0.439	0.337
HERC1	0.221	1.33511	0.445123	0.546	0.575	0.506	0.388
PBXIP1	0.221	1.33511	0.566033	0.526	0.466	0.411	0.29
SENP7	0.221	1.33511	0.440977	0.474	0.526	0.395	0.301
XAF1	0.221	1.33511	0.415875	0.557	0.556	0.454	0.353
OXR1	0.22	1.32907	0.459156	0.598	0.62	0.558	0.426
TMEM205	0.22	1.32907	0.411674	0.515	0.54	0.428	0.333
AKIRIN2	0.219	1.32303	0.451681	0.515	0.577	0.446	0.339
CHMP2B	0.219	1.32303	0.459188	0.485	0.55	0.448	0.339
EIF4E2	0.219	1.32303	0.438753	0.505	0.528	0.435	0.333
LINC00493	0.219	1.32303	0.429949	0.474	0.554	0.405	0.311
PURA	0.219	1.32303	0.453022	0.536	0.528	0.44	0.334
RAB13	0.219	1.32303	0.400604	0.608	0.652	0.576	0.456
SEMA3A	0.219	1.32303	0.500136	0.68	0.661	0.852	0.65
TRIB1	0.219	1.32303	0.461503	0.649	0.648	0.703	0.542
ZZZ3	0.219	1.32303	0.487473	0.485	0.503	0.388	0.287
TRIM13	0.218	1.31699	0.431023	0.526	0.546	0.404	0.31
ULK1	0.218	1.31699	0.445668	0.557	0.544	0.433	0.33
RPS19BP1	0.217	1.31095	0.422337	0.495	0.507	0.359	0.276
TRH	0.217	1.31095	0.401666	0.639	0.699	1.16	0.952
RING1	0.216	1.30491	0.557053	0.526	0.485	0.402	0.285
WIPF2	0.216	1.30491	0.439698	0.495	0.528	0.415	0.317
BAD	0.215	1.29887	0.42551	0.485	0.526	0.385	0.296
NEDD4L	0.215	1.29887	0.493374	0.474	0.505	0.426	0.315
CPXM1	0.214	1.29282	0.511953	0.505	0.485	0.411	0.3
PLOD1	0.214	1.29282	0.412768	0.577	0.609	0.531	0.416
TACC2	0.214	1.29282	0.42176	0.495	0.519	0.403	0.311
TBC1D10B	0.214	1.29282	0.458336	0.495	0.521	0.412	0.311
TBC1D5	0.214	1.29282	0.438388	0.629	0.591	0.519	0.4
REV3L	0.213	1.28678	0.435159	0.68	0.626	0.633	0.493
KBTBD2	0.212	1.28074	0.444912	0.557	0.534	0.429	0.327
IER2	0.211	1.2747	0.419005	0.526	0.56	0.56	0.438
ZNF503	0.211	1.2747	0.52006	0.464	0.503	0.592	0.437
PLXNB2	0.209	1.26262	0.412519	0.474	0.519	0.397	0.308
XRN1	0.208	1.25658	0.412697	0.454	0.536	0.432	0.336
SLC35E1	0.206	1.24449	0.401791	0.515	0.485	0.367	0.286
RGS4	0.199	1.20221	0.474334	0.546	0.501	0.959	0.748

## Sheet: GO terms seg 6 > seg 3
GO term analysis: seg 6 > seg 3
Analysis Type:	PANTHER Overrepresentation Test (Released 20210224)
Annotation Version and Release Date:	GO Ontology database DOI: 10.5281/zenodo.5228828 Released 2021-08-18
Analyzed List:	upload_1 (Homo sapiens)
Reference List:	Homo sapiens (all genes in database)
Test Type:	FISHER
Correction:	FDR
GO biological process complete	Homo sapiens - REFLIST (20595)	upload_1 (790)	upload_1 (expected)	upload_1 (over/under)	upload_1 (fold Enrichment)	upload_1 (raw P-value)	upload_1 (FDR)
negative regulation of biological process (GO:0048519)	5187	300	198.97	+	1.51	1.03e-14	8.06e-11
biological_process (GO:0008150)	17698	747	678.87	+	1.1	2.65e-14	8.34e-11
negative regulation of cellular process (GO:0048523)	4785	283	183.55	+	1.54	5.55e-15	8.72e-11
Unclassified (UNCLASSIFIED)	2897	43	111.13	-	0.39	2.65e-14	1.04e-10
cellular process (GO:0009987)	15074	670	578.22	+	1.16	2.48e-14	1.3e-10
positive regulation of cellular process (GO:0048522)	5580	311	214.04	+	1.45	2.69e-13	7.05e-10
cellular metabolic process (GO:0044237)	7029	371	269.62	+	1.38	3.35e-13	7.52e-10
cellular component organization (GO:0016043)	5298	297	203.23	+	1.46	7.06e-13	1.39e-09
regulation of molecular function (GO:0065009)	3060	196	117.38	+	1.67	1.01e-12	1.76e-09
positive regulation of biological process (GO:0048518)	6062	328	232.53	+	1.41	1.8e-12	2.82e-09
regulation of primary metabolic process (GO:0080090)	5707	312	218.91	+	1.43	2.41e-12	3.45e-09
cellular component organization or biogenesis (GO:0071840)	5496	303	210.82	+	1.44	3.11e-12	4.08e-09
regulation of nitrogen compound metabolic process (GO:0051171)	5537	303	212.39	+	1.43	6.38e-12	7.72e-09
regulation of metabolic process (GO:0019222)	6586	346	252.63	+	1.37	9.92e-12	9.75e-09
regulation of cellular metabolic process (GO:0031323)	5928	319	227.39	+	1.4	9.56e-12	1e-08
negative regulation of metabolic process (GO:0009892)	2952	187	113.24	+	1.65	9.24e-12	1.04e-08
multicellular organism development (GO:0007275)	4525	258	173.57	+	1.49	1.19e-11	1.1e-08
regulation of biological process (GO:0050789)	11528	537	442.2	+	1.21	1.43e-11	1.25e-08
anatomical structure development (GO:0048856)	5001	278	191.83	+	1.45	1.81e-11	1.5e-08
cardiac chamber morphogenesis (GO:0003206)	119	26	4.56	+	5.7	2.11e-11	1.66e-08
cardiac chamber development (GO:0003205)	162	30	6.21	+	4.83	2.3e-11	1.72e-08
muscle system process (GO:0003012)	271	39	10.4	+	3.75	2.43e-11	1.73e-08
muscle contraction (GO:0006936)	222	35	8.52	+	4.11	2.78e-11	1.9e-08
animal organ development (GO:0048513)	3079	191	118.11	+	1.62	2.96e-11	1.94e-08
heart development (GO:0007507)	533	57	20.45	+	2.79	3.75e-11	2.27e-08
metabolic process (GO:0008152)	7882	396	302.34	+	1.31	3.71e-11	2.33e-08
negative regulation of cellular metabolic process (GO:0031324)	2546	165	97.66	+	1.69	4.32e-11	2.52e-08
generation of precursor metabolites and energy (GO:0006091)	391	47	15	+	3.13	6.19e-11	3.47e-08
regulation of localization (GO:0032879)	2709	172	103.91	+	1.66	6.79e-11	3.56e-08
anatomical structure morphogenesis (GO:0009653)	2130	144	81.7	+	1.76	6.61e-11	3.58e-08
developmental process (GO:0032502)	5565	299	213.47	+	1.4	8.57e-11	4.35e-08
regulation of macromolecule metabolic process (GO:0060255)	6083	321	233.34	+	1.38	9.06e-11	4.45e-08
system development (GO:0048731)	4169	238	159.92	+	1.49	1.16e-10	5.54e-08
negative regulation of nitrogen compound metabolic process (GO:0051172)	2380	155	91.29	+	1.7	1.61e-10	7.46e-08
cellular component morphogenesis (GO:0032989)	569	58	21.83	+	2.66	1.78e-10	8.01e-08
regulation of cellular process (GO:0050794)	11076	515	424.86	+	1.21	2.09e-10	9.12e-08
muscle cell development (GO:0055001)	151	27	5.79	+	4.66	4.56e-10	1.94e-07
cellular component assembly (GO:0022607)	2251	146	86.35	+	1.69	8.13e-10	3.36e-07
negative regulation of macromolecule metabolic process (GO:0010605)	2737	169	104.99	+	1.61	8.98e-10	3.53e-07
negative regulation of biosynthetic process (GO:0009890)	1649	116	63.25	+	1.83	8.83e-10	3.56e-07
negative regulation of cellular biosynthetic process (GO:0031327)	1616	114	61.99	+	1.84	9.89e-10	3.79e-07
cellular developmental process (GO:0048869)	3463	202	132.84	+	1.52	1.1e-09	4.03e-07
energy derivation by oxidation of organic compounds (GO:0015980)	245	34	9.4	+	3.62	1.08e-09	4.05e-07
muscle structure development (GO:0061061)	477	50	18.3	+	2.73	1.15e-09	4.11e-07
organelle organization (GO:0006996)	3360	197	128.89	+	1.53	1.29e-09	4.5e-07
positive regulation of cellular metabolic process (GO:0031325)	3186	189	122.21	+	1.55	1.42e-09	4.85e-07
cell differentiation (GO:0030154)	3403	199	130.54	+	1.52	1.51e-09	5.06e-07
biological regulation (GO:0065007)	12249	553	469.86	+	1.18	1.86e-09	6.09e-07
striated muscle contraction (GO:0006941)	107	22	4.1	+	5.36	1.98e-09	6.34e-07
regulation of cellular biosynthetic process (GO:0031326)	4088	229	156.81	+	1.46	2.07e-09	6.49e-07
circulatory system development (GO:0072359)	870	73	33.37	+	2.19	2.66e-09	7.88e-07
regulation of biosynthetic process (GO:0009889)	4152	231	159.27	+	1.45	2.61e-09	7.9e-07
negative regulation of cellular macromolecule biosynthetic process (GO:2000113)	1547	109	59.34	+	1.84	2.58e-09	7.95e-07
cardiac ventricle development (GO:0003231)	123	23	4.72	+	4.87	4.2e-09	1.2e-06
negative regulation of macromolecule biosynthetic process (GO:0010558)	1558	109	59.76	+	1.82	4.15e-09	1.21e-06
positive regulation of metabolic process (GO:0009893)	3675	208	140.97	+	1.48	6.3e-09	1.77e-06
heart morphogenesis (GO:0003007)	238	32	9.13	+	3.51	6.66e-09	1.84e-06
positive regulation of nitrogen compound metabolic process (GO:0051173)	2992	177	114.77	+	1.54	6.79e-09	1.84e-06
muscle cell differentiation (GO:0042692)	252	33	9.67	+	3.41	6.96e-09	1.85e-06
positive regulation of RNA metabolic process (GO:0051254)	1737	117	66.63	+	1.76	7.4e-09	1.94e-06
regulation of cellular macromolecule biosynthetic process (GO:2000112)	3906	218	149.83	+	1.45	7.89e-09	2.03e-06
ATP metabolic process (GO:0046034)	202	29	7.75	+	3.74	9.27e-09	2.31e-06
regulation of cellular component movement (GO:0051270)	1025	80	39.32	+	2.03	9.23e-09	2.34e-06
positive regulation of transcription, DNA-templated (GO:0045893)	1611	110	61.8	+	1.78	1.12e-08	2.7e-06
positive regulation of nucleic acid-templated transcription (GO:1903508)	1611	110	61.8	+	1.78	1.12e-08	2.75e-06
striated muscle tissue development (GO:0014706)	288	35	11.05	+	3.17	1.37e-08	3.27e-06
detection of chemical stimulus involved in sensory perception (GO:0050907)	488	0	18.72	-	< 0.01	1.51e-08	3.39e-06
cellular component biogenesis (GO:0044085)	2481	152	95.17	+	1.6	1.47e-08	3.39e-06
regulation of macromolecule biosynthetic process (GO:0010556)	3935	218	150.94	+	1.44	1.49e-08	3.39e-06
muscle tissue development (GO:0060537)	303	36	11.62	+	3.1	1.45e-08	3.4e-06
positive regulation of RNA biosynthetic process (GO:1902680)	1613	110	61.87	+	1.78	1.58e-08	3.5e-06
regulation of RNA metabolic process (GO:0051252)	3698	207	141.85	+	1.46	2.01e-08	4.39e-06
positive regulation of cellular component organization (GO:0051130)	1119	84	42.92	+	1.96	2.33e-08	5.01e-06
nervous system development (GO:0007399)	2193	137	84.12	+	1.63	2.71e-08	5.45e-06
regulation of cellular component organization (GO:0051128)	2359	145	90.49	+	1.6	2.7e-08	5.5e-06
negative regulation of nucleobase-containing compound metabolic process (GO:0045934)	1538	105	59	+	1.78	2.66e-08	5.51e-06
positive regulation of macromolecule metabolic process (GO:0010604)	3382	192	129.73	+	1.48	2.65e-08	5.55e-06
positive regulation of molecular function (GO:0044093)	1497	103	57.42	+	1.79	2.62e-08	5.57e-06
heart process (GO:0003015)	104	20	3.99	+	5.01	2.85e-08	5.66e-06
neurogenesis (GO:0022008)	1361	96	52.21	+	1.84	3.18e-08	6.17e-06
negative regulation of transcription, DNA-templated (GO:0045892)	1322	94	50.71	+	1.85	3.15e-08	6.18e-06
negative regulation of nucleic acid-templated transcription (GO:1903507)	1324	94	50.79	+	1.85	3.23e-08	6.2e-06
negative regulation of RNA biosynthetic process (GO:1902679)	1326	94	50.86	+	1.85	3.33e-08	6.31e-06
regulation of nucleic acid-templated transcription (GO:1903506)	3416	193	131.03	+	1.47	3.88e-08	6.92e-06
positive regulation of macromolecule biosynthetic process (GO:0010557)	1847	120	70.85	+	1.69	3.73e-08	6.97e-06
positive regulation of cellular biosynthetic process (GO:0031328)	1949	125	74.76	+	1.67	3.88e-08	7e-06
regulation of gene expression (GO:0010468)	4749	251	182.17	+	1.38	3.81e-08	7.04e-06
regulation of RNA biosynthetic process (GO:2001141)	3421	193	131.23	+	1.47	3.99e-08	7.05e-06
regulation of transcription, DNA-templated (GO:0006355)	3415	193	131	+	1.47	3.86e-08	7.05e-06
negative regulation of RNA metabolic process (GO:0051253)	1433	99	54.97	+	1.8	4.53e-08	7.92e-06
regulation of heart contraction (GO:0008016)	193	27	7.4	+	3.65	4.84e-08	8.18e-06
striated muscle cell differentiation (GO:0051146)	193	27	7.4	+	3.65	4.84e-08	8.27e-06
cellular respiration (GO:0045333)	180	26	6.9	+	3.77	4.83e-08	8.34e-06
positive regulation of biosynthetic process (GO:0009891)	1985	126	76.14	+	1.65	5.11e-08	8.55e-06
positive regulation of transcription by RNA polymerase II (GO:0045944)	1185	86	45.46	+	1.89	5.47e-08	9.06e-06
positive regulation of nucleobase-containing compound metabolic process (GO:0045935)	1902	122	72.96	+	1.67	5.6e-08	9.16e-06
cell development (GO:0048468)	1623	108	62.26	+	1.73	5.77e-08	9.35e-06
regulation of catalytic activity (GO:0050790)	2393	145	91.79	+	1.58	6.25e-08	1e-05
regulation of multicellular organismal process (GO:0051239)	2578	154	98.89	+	1.56	6.32e-08	1e-05
cardiac muscle tissue development (GO:0048738)	171	25	6.56	+	3.81	7.08e-08	1.11e-05
primary metabolic process (GO:0044238)	6869	338	263.49	+	1.28	7.23e-08	1.13e-05
protein modification process (GO:0036211)	2610	155	100.12	+	1.55	7.42e-08	1.13e-05
cellular protein modification process (GO:0006464)	2610	155	100.12	+	1.55	7.42e-08	1.14e-05
protein-containing complex subunit organization (GO:0043933)	1337	93	51.29	+	1.81	8.76e-08	1.32e-05
regulation of nucleobase-containing compound metabolic process (GO:0019219)	3931	214	150.79	+	1.42	9.17e-08	1.37e-05
heart contraction (GO:0060047)	91	18	3.49	+	5.16	9.63e-08	1.43e-05
regulation of blood circulation (GO:1903522)	243	30	9.32	+	3.22	1.09e-07	1.6e-05
organic substance metabolic process (GO:0071704)	7404	358	284.01	+	1.26	1.21e-07	1.75e-05
detection of chemical stimulus involved in sensory perception of smell (GO:0050911)	443	0	16.99	-	< 0.01	1.21e-07	1.76e-05
regulation of organelle organization (GO:0033043)	1189	85	45.61	+	1.86	1.36e-07	1.94e-05
response to organic substance (GO:0010033)	2688	157	103.11	+	1.52	1.48e-07	2.09e-05
aerobic respiration (GO:0009060)	153	23	5.87	+	3.92	1.5e-07	2.11e-05
generation of neurons (GO:0048699)	1237	87	47.45	+	1.83	1.56e-07	2.17e-05
regulation of cell migration (GO:0030334)	894	69	34.29	+	2.01	1.61e-07	2.22e-05
cardiac cell development (GO:0055006)	64	15	2.45	+	6.11	1.7e-07	2.32e-05
macromolecule modification (GO:0043412)	2825	163	108.36	+	1.5	1.95e-07	2.65e-05
protein-containing complex assembly (GO:0065003)	1185	84	45.46	+	1.85	2e-07	2.69e-05
cardiac muscle contraction (GO:0060048)	75	16	2.88	+	5.56	2.02e-07	2.7e-05
cellular macromolecule metabolic process (GO:0044260)	4442	234	170.39	+	1.37	2.08e-07	2.75e-05
anatomical structure formation involved in morphogenesis (GO:0048646)	881	68	33.79	+	2.01	2.13e-07	2.79e-05
negative regulation of cell population proliferation (GO:0008285)	704	58	27	+	2.15	2.16e-07	2.81e-05
regulation of muscle cell differentiation (GO:0051147)	132	21	5.06	+	4.15	2.25e-07	2.9e-05
regulation of protein metabolic process (GO:0051246)	2492	147	95.59	+	1.54	2.56e-07	3.27e-05
organonitrogen compound metabolic process (GO:1901564)	4787	248	183.62	+	1.35	2.73e-07	3.46e-05
negative regulation of cell migration (GO:0030336)	270	31	10.36	+	2.99	2.88e-07	3.62e-05
detection of stimulus involved in sensory perception (GO:0050906)	558	2	21.4	-	0.09	2.98e-07	3.72e-05
positive regulation of transport (GO:0051050)	909	69	34.87	+	1.98	3.25e-07	4.02e-05
nitrogen compound metabolic process (GO:0006807)	6360	313	243.96	+	1.28	3.42e-07	4.2e-05
cellular protein metabolic process (GO:0044267)	3219	179	123.48	+	1.45	3.86e-07	4.67e-05
cardiac muscle cell development (GO:0055013)	59	14	2.26	+	6.19	3.84e-07	4.68e-05
animal organ morphogenesis (GO:0009887)	957	71	36.71	+	1.93	4.05e-07	4.86e-05
sensory perception of chemical stimulus (GO:0007606)	542	2	20.79	-	0.1	4.18e-07	4.98e-05
cardiac ventricle morphogenesis (GO:0003208)	70	15	2.69	+	5.59	4.61e-07	5.45e-05
regulation of developmental process (GO:0050793)	2368	140	90.83	+	1.54	4.65e-07	5.45e-05
cardiac septum development (GO:0003279)	103	18	3.95	+	4.56	4.87e-07	5.67e-05
tissue development (GO:0009888)	1597	103	61.26	+	1.68	5.79e-07	6.69e-05
regulation of cell motility (GO:2000145)	950	70	36.44	+	1.92	5.93e-07	6.8e-05
brain development (GO:0007420)	761	60	29.19	+	2.06	6.01e-07	6.84e-05
mitochondrion organization (GO:0007005)	409	39	15.69	+	2.49	7.7e-07	8.58e-05
head development (GO:0060322)	806	62	30.92	+	2.01	7.67e-07	8.61e-05
neuron differentiation (GO:0030182)	1008	73	38.67	+	1.89	7.65e-07	8.65e-05
regulation of cell population proliferation (GO:0042127)	1650	105	63.29	+	1.66	8.43e-07	9.2e-05
negative regulation of cell motility (GO:2000146)	285	31	10.93	+	2.84	8.32e-07	9.21e-05
cardiac atrium development (GO:0003230)	36	11	1.38	+	7.97	8.42e-07	9.25e-05
axon guidance (GO:0007411)	227	27	8.71	+	3.1	9.01e-07	9.76e-05
negative regulation of locomotion (GO:0040013)	317	33	12.16	+	2.71	9.08e-07	9.78e-05
neuron projection guidance (GO:0097485)	228	27	8.75	+	3.09	9.73e-07	0.000103
cellular component assembly involved in morphogenesis (GO:0010927)	97	17	3.72	+	4.57	9.72e-07	0.000104
cardiac septum morphogenesis (GO:0060411)	66	14	2.53	+	5.53	1.23e-06	0.00013
response to decreased oxygen levels (GO:0036293)	307	32	11.78	+	2.72	1.29e-06	0.000135
regulation of system process (GO:0044057)	553	47	21.21	+	2.22	1.42e-06	0.000147
negative regulation of cellular component movement (GO:0051271)	293	31	11.24	+	2.76	1.42e-06	0.000148
regulation of locomotion (GO:0040012)	990	71	37.98	+	1.87	1.46e-06	0.000149
regulation of transport (GO:0051049)	1732	108	66.44	+	1.63	1.45e-06	0.000149
oxidative phosphorylation (GO:0006119)	113	18	4.33	+	4.15	1.6e-06	0.000162
myofibril assembly (GO:0030239)	58	13	2.22	+	5.84	1.73e-06	0.000173
mitochondrial respiratory chain complex I assembly (GO:0032981)	58	13	2.22	+	5.84	1.73e-06	0.000174
NADH dehydrogenase complex assembly (GO:0010257)	58	13	2.22	+	5.84	1.73e-06	0.000175
electron transport chain (GO:0022900)	166	22	6.37	+	3.46	1.87e-06	0.000185
apoptotic process (GO:0006915)	905	66	34.71	+	1.9	1.92e-06	0.000189
programmed cell death (GO:0012501)	942	68	36.13	+	1.88	1.95e-06	0.00019
striated muscle cell development (GO:0055002)	59	13	2.26	+	5.74	2.05e-06	0.000198
muscle organ development (GO:0007517)	284	30	10.89	+	2.75	2.15e-06	0.000208
regulation of cellular protein metabolic process (GO:0032268)	2328	135	89.3	+	1.51	2.19e-06	0.00021
regulation of smooth muscle cell differentiation (GO:0051150)	32	10	1.23	+	8.15	2.25e-06	0.000214
mitochondrial respiratory chain complex assembly (GO:0033108)	93	16	3.57	+	4.49	2.5e-06	0.000235
regulation of cellular localization (GO:0060341)	820	61	31.45	+	1.94	2.48e-06	0.000235
regulation of biological quality (GO:0065008)	3705	196	142.12	+	1.38	2.54e-06	0.000237
plasma membrane bounded cell projection morphogenesis (GO:0120039)	459	41	17.61	+	2.33	2.91e-06	0.000271
cell part morphogenesis (GO:0032990)	483	42	18.53	+	2.27	2.97e-06	0.000275
cardiac muscle cell differentiation (GO:0055007)	83	15	3.18	+	4.71	3e-06	0.000276
cell death (GO:0008219)	978	69	37.51	+	1.84	3.06e-06	0.00028
regulation of ion transmembrane transporter activity (GO:0032412)	259	28	9.93	+	2.82	3.12e-06	0.000284
cell projection morphogenesis (GO:0048858)	463	41	17.76	+	2.31	3.16e-06	0.000285
response to oxygen levels (GO:0070482)	334	33	12.81	+	2.58	3.47e-06	0.000311
response to hypoxia (GO:0001666)	292	30	11.2	+	2.68	3.59e-06	0.000319
actomyosin structure organization (GO:0031032)	108	17	4.14	+	4.1	3.58e-06	0.000319
regulation of cardiac muscle contraction by calcium ion signaling (GO:0010882)	26	9	1	+	9.02	3.64e-06	0.000322
response to oxygen-containing compound (GO:1901700)	1567	98	60.11	+	1.63	3.73e-06	0.000328
axonogenesis (GO:0007409)	337	33	12.93	+	2.55	3.87e-06	0.000338
cardiocyte differentiation (GO:0035051)	109	17	4.18	+	4.07	4e-06	0.000347
response to endogenous stimulus (GO:0009719)	1342	87	51.48	+	1.69	4.06e-06	0.00035
protein metabolic process (GO:0019538)	3807	199	146.03	+	1.36	4.95e-06	0.000423
cell morphogenesis involved in neuron differentiation (GO:0048667)	408	37	15.65	+	2.36	4.92e-06	0.000423
forebrain development (GO:0030900)	387	36	14.84	+	2.43	5.08e-06	0.000432
sensory perception of smell (GO:0007608)	468	2	17.95	-	0.11	5.58e-06	0.000472
regulation of heart rate (GO:0002027)	100	16	3.84	+	4.17	5.72e-06	0.000481
detection of chemical stimulus (GO:0009593)	524	3	20.1	-	0.15	5.97e-06	0.000499
regulation of cell differentiation (GO:0045595)	1496	94	57.38	+	1.64	6.06e-06	0.000504
negative regulation of cellular protein metabolic process (GO:0032269)	962	67	36.9	+	1.82	6.1e-06	0.000504
regulation of metal ion transport (GO:0010959)	394	36	15.11	+	2.38	6.15e-06	0.000506
regulation of neuron projection development (GO:0010975)	443	39	16.99	+	2.3	6.47e-06	0.000524
regulation of transmembrane transporter activity (GO:0022898)	270	28	10.36	+	2.7	6.42e-06	0.000526
regulation of programmed cell death (GO:0043067)	1456	92	55.85	+	1.65	6.46e-06	0.000526
multicellular organismal process (GO:0032501)	6584	314	252.55	+	1.24	6.57e-06	0.00053
regulation of transporter activity (GO:0032409)	287	29	11.01	+	2.63	6.98e-06	0.000559
regulation of apoptotic process (GO:0042981)	1426	90	54.7	+	1.65	7.48e-06	0.000597
cardiac atrium morphogenesis (GO:0003209)	29	9	1.11	+	8.09	7.61e-06	0.000604
tube morphogenesis (GO:0035239)	644	50	24.7	+	2.02	7.8e-06	0.000616
central nervous system development (GO:0007417)	1002	69	38.44	+	1.8	8.54e-06	0.000671
aerobic electron transport chain (GO:0019646)	80	14	3.07	+	4.56	8.84e-06	0.000691
neuron projection development (GO:0031175)	651	50	24.97	+	2	9.17e-06	0.00071
neuron projection morphogenesis (GO:0048812)	455	39	17.45	+	2.23	9.15e-06	0.000712
respiratory electron transport chain (GO:0022904)	105	16	4.03	+	3.97	9.91e-06	0.000764
tissue morphogenesis (GO:0048729)	542	44	20.79	+	2.12	1.01e-05	0.000776
regulation of muscle system process (GO:0090257)	231	25	8.86	+	2.82	1.02e-05	0.000777
actin filament-based movement (GO:0030048)	93	15	3.57	+	4.2	1.02e-05	0.00078
actin filament-based process (GO:0030029)	599	47	22.98	+	2.05	1.04e-05	0.000787
phosphorylation (GO:0016310)	874	62	33.53	+	1.85	1.12e-05	0.000842
positive regulation of establishment of protein localization (GO:1904951)	326	31	12.5	+	2.48	1.17e-05	0.000878
atrial septum development (GO:0003283)	23	8	0.88	+	9.07	1.24e-05	0.000924
macromolecule metabolic process (GO:0043170)	5743	278	220.29	+	1.26	1.29e-05	0.000953
neuron development (GO:0048666)	810	58	31.07	+	1.87	1.3e-05	0.000958
positive regulation of protein transport (GO:0051222)	310	30	11.89	+	2.52	1.31e-05	0.00096
regulation of cation transmembrane transport (GO:1904062)	347	32	13.31	+	2.4	1.39e-05	0.00102
negative regulation of protein modification process (GO:0031400)	500	41	19.18	+	2.14	1.42e-05	0.00103
regulation of cell death (GO:0010941)	1593	97	61.11	+	1.59	1.51e-05	0.00109
response to organonitrogen compound (GO:0010243)	984	67	37.75	+	1.78	1.56e-05	0.00112
ATP synthesis coupled electron transport (GO:0042773)	85	14	3.26	+	4.29	1.63e-05	0.00116
mitochondrial ATP synthesis coupled electron transport (GO:0042775)	85	14	3.26	+	4.29	1.63e-05	0.00116
negative regulation of protein metabolic process (GO:0051248)	1028	69	39.43	+	1.75	1.62e-05	0.00116
regulation of multicellular organismal development (GO:2000026)	1294	82	49.64	+	1.65	1.65e-05	0.00117
immune response (GO:0006955)	1678	33	64.37	-	0.51	1.71e-05	0.0012
adaptive immune response (GO:0002250)	640	6	24.55	-	0.24	1.74e-05	0.00122
cell morphogenesis involved in differentiation (GO:0000904)	517	42	19.83	+	2.12	1.81e-05	0.00127
regulation of cell communication (GO:0010646)	3242	171	124.36	+	1.38	1.96e-05	0.00136
endocardial cushion development (GO:0003197)	44	10	1.69	+	5.92	2.45e-05	0.0017
movement of cell or subcellular component (GO:0006928)	1413	87	54.2	+	1.61	2.56e-05	0.00176
positive regulation of developmental process (GO:0051094)	1267	80	48.6	+	1.65	2.59e-05	0.00178
regulation of cell cycle (GO:0051726)	1001	67	38.4	+	1.74	2.66e-05	0.00182
axon development (GO:0061564)	375	33	14.38	+	2.29	2.67e-05	0.00182
ventricular cardiac muscle tissue development (GO:0003229)	55	11	2.11	+	5.21	2.74e-05	0.00186
mitochondrial electron transport, NADH to ubiquinone (GO:0006120)	45	10	1.73	+	5.79	2.9e-05	0.00195
muscle tissue morphogenesis (GO:0060415)	67	12	2.57	+	4.67	3.13e-05	0.00211
regulation of cell projection organization (GO:0031344)	643	48	24.66	+	1.95	3.19e-05	0.00213
plasma membrane bounded cell projection organization (GO:0120036)	1068	70	40.97	+	1.71	3.26e-05	0.00217
response to nitrogen compound (GO:1901698)	1071	70	41.08	+	1.7	3.35e-05	0.00222
G protein-coupled receptor signaling pathway (GO:0007186)	1216	21	46.64	-	0.45	3.44e-05	0.00227
regulation of striated muscle contraction (GO:0006942)	92	14	3.53	+	3.97	3.56e-05	0.00234
regulation of transcription by RNA polymerase II (GO:0006357)	2538	138	97.35	+	1.42	3.81e-05	0.0025
regulation of plasma membrane bounded cell projection organization (GO:0120035)	626	47	24.01	+	1.96	3.97e-05	0.00259
regulation of release of sequestered calcium ion into cytosol by sarcoplasmic reticulum (GO:0010880)	28	8	1.07	+	7.45	4.04e-05	0.00262
regulation of muscle contraction (GO:0006937)	162	19	6.21	+	3.06	4.32e-05	0.0028
sensory perception (GO:0007600)	978	15	37.51	-	0.4	4.52e-05	0.00291
ventricular septum development (GO:0003281)	70	12	2.69	+	4.47	4.58e-05	0.00294
response to hormone (GO:0009725)	772	54	29.61	+	1.82	4.62e-05	0.00295
negative regulation of cell death (GO:0060548)	982	65	37.67	+	1.73	4.72e-05	0.003
mesenchyme development (GO:0060485)	224	23	8.59	+	2.68	4.84e-05	0.00307
regulation of signaling (GO:0023051)	3257	169	124.93	+	1.35	4.91e-05	0.0031
cell morphogenesis (GO:0000902)	675	49	25.89	+	1.89	4.93e-05	0.0031
negative regulation of cell differentiation (GO:0045596)	641	47	24.59	+	1.91	5.15e-05	0.00323
regulation of membrane potential (GO:0042391)	434	36	16.65	+	2.16	5.35e-05	0.00334
cardiac muscle cell action potential (GO:0086001)	49	10	1.88	+	5.32	5.45e-05	0.00338
regulation of cardiac muscle contraction by regulation of the release of sequestered calcium ion (GO:0010881)	21	7	0.81	+	8.69	5.49e-05	0.00339
negative regulation of transcription by RNA polymerase II (GO:0000122)	932	62	35.75	+	1.73	6.39e-05	0.00394
regulation of protein localization (GO:0032880)	853	58	32.72	+	1.77	6.61e-05	0.00406
cell projection organization (GO:0030030)	1119	71	42.92	+	1.65	6.85e-05	0.00419
cellular protein-containing complex assembly (GO:0034622)	780	54	29.92	+	1.8	7.04e-05	0.00429
regulation of potassium ion transmembrane transporter activity (GO:1901016)	62	11	2.38	+	4.63	7.18e-05	0.00436
muscle organ morphogenesis (GO:0048644)	74	12	2.84	+	4.23	7.39e-05	0.00447
regulation of catabolic process (GO:0009894)	956	63	36.67	+	1.72	7.84e-05	0.0047
catabolic process (GO:0009056)	1882	107	72.19	+	1.48	7.81e-05	0.00471
regulation of potassium ion transmembrane transport (GO:1901379)	87	13	3.34	+	3.9	7.94e-05	0.00474
actin-mediated cell contraction (GO:0070252)	63	11	2.42	+	4.55	8.16e-05	0.00486
neural tube development (GO:0021915)	156	18	5.98	+	3.01	8.24e-05	0.00489
blood circulation (GO:0008015)	399	33	15.31	+	2.16	8.44e-05	0.00498
regulation of ossification (GO:0030278)	115	15	4.41	+	3.4	9.31e-05	0.00542
negative regulation of programmed cell death (GO:0043069)	888	59	34.06	+	1.73	9.22e-05	0.00542
positive regulation of organelle organization (GO:0010638)	583	43	22.36	+	1.92	9.31e-05	0.00544
circulatory system process (GO:0003013)	490	38	18.8	+	2.02	9.3e-05	0.00546
regulation of phosphorus metabolic process (GO:0051174)	1379	83	52.9	+	1.57	9.56e-05	0.00552
regulation of phosphate metabolic process (GO:0019220)	1379	83	52.9	+	1.57	9.56e-05	0.00555
negative regulation of molecular function (GO:0044092)	1132	71	43.42	+	1.64	0.000103	0.00595
cell communication involved in cardiac conduction (GO:0086065)	43	9	1.65	+	5.46	0.000108	0.00618
protein tetramerization (GO:0051262)	90	13	3.45	+	3.77	0.000108	0.00619
epithelial tube formation (GO:0072175)	131	16	5.03	+	3.18	0.000111	0.00632
negative regulation of apoptotic process (GO:0043066)	870	58	33.37	+	1.74	0.000112	0.00638
tube formation (GO:0035148)	146	17	5.6	+	3.04	0.000116	0.00658
neural tube formation (GO:0001841)	104	14	3.99	+	3.51	0.000117	0.00659
cardiac conduction (GO:0061337)	66	11	2.53	+	4.34	0.000118	0.00662
regulation of epithelial cell proliferation (GO:0050678)	338	29	12.97	+	2.24	0.000123	0.00686
supramolecular fiber organization (GO:0097435)	512	39	19.64	+	1.99	0.000125	0.00696
negative regulation of phosphorylation (GO:0042326)	369	31	14.15	+	2.19	0.000126	0.00701
positive regulation of endopeptidase activity (GO:0010950)	178	19	6.83	+	2.78	0.000135	0.00746
regulation of protein transport (GO:0051223)	516	39	19.79	+	1.97	0.000135	0.00748
phosphate-containing compound metabolic process (GO:0006796)	1758	100	67.43	+	1.48	0.000137	0.0075
telencephalon development (GO:0021537)	254	24	9.74	+	2.46	0.000137	0.00751
positive regulation of hydrolase activity (GO:0051345)	588	43	22.55	+	1.91	0.000144	0.00785
positive regulation of transporter activity (GO:0032411)	121	15	4.64	+	3.23	0.000155	0.00844
regulation of protein modification process (GO:0031399)	1483	87	56.89	+	1.53	0.000161	0.00873
regulation of stem cell differentiation (GO:2000736)	57	10	2.19	+	4.57	0.000165	0.0089
negative regulation of protein phosphorylation (GO:0001933)	327	28	12.54	+	2.23	0.000168	0.009
proteasome-mediated ubiquitin-dependent protein catabolic process (GO:0043161)	306	27	11.74	+	2.3	0.000167	0.00902
ventricular cardiac muscle tissue morphogenesis (GO:0055010)	46	9	1.76	+	5.1	0.000169	0.00903
regulation of ATPase activity (GO:0043462)	46	9	1.76	+	5.1	0.000169	0.00906
regulation of cell proliferation involved in heart morphogenesis (GO:2000136)	18	6	0.69	+	8.69	0.00019	0.01
regulation of establishment of protein localization (GO:0070201)	541	40	20.75	+	1.93	0.000189	0.01
primary neural tube formation (GO:0014020)	96	13	3.68	+	3.53	0.000193	0.0102
phosphorus metabolic process (GO:0006793)	1779	100	68.24	+	1.47	0.000194	0.0102
positive regulation of catalytic activity (GO:0043085)	1134	70	43.5	+	1.61	0.000198	0.0104
positive regulation of ion transmembrane transporter activity (GO:0032414)	110	14	4.22	+	3.32	0.000199	0.0104
embryo development (GO:0009790)	991	63	38.01	+	1.66	0.000205	0.0106
cardiac muscle tissue morphogenesis (GO:0055008)	59	10	2.26	+	4.42	0.000211	0.0109
glomerular visceral epithelial cell development (GO:0072015)	11	5	0.42	+	11.85	0.000211	0.011
positive regulation of Wnt signaling pathway (GO:0030177)	140	16	5.37	+	2.98	0.000222	0.0114
negative regulation of phosphate metabolic process (GO:0045936)	423	33	16.23	+	2.03	0.000233	0.012
negative regulation of phosphorus metabolic process (GO:0010563)	424	33	16.26	+	2.03	0.00024	0.0123
renal filtration cell differentiation (GO:0061318)	19	6	0.73	+	8.23	0.000242	0.0123
glomerular visceral epithelial cell differentiation (GO:0072112)	19	6	0.73	+	8.23	0.000242	0.0123
ventricular septum morphogenesis (GO:0060412)	38	8	1.46	+	5.49	0.000251	0.0127
cellular response to endogenous stimulus (GO:0071495)	1070	66	41.04	+	1.61	0.000258	0.013
ADP metabolic process (GO:0046031)	49	9	1.88	+	4.79	0.000257	0.013
embryonic morphogenesis (GO:0048598)	568	41	21.79	+	1.88	0.000268	0.0134
protein catabolic process (GO:0030163)	682	47	26.16	+	1.8	0.000277	0.0139
regulation of hydrolase activity (GO:0051336)	1033	64	39.62	+	1.62	0.000282	0.0141
appendage development (GO:0048736)	174	18	6.67	+	2.7	0.000286	0.0142
limb development (GO:0060173)	174	18	6.67	+	2.7	0.000286	0.0142
regulation of cardiac muscle contraction (GO:0055117)	74	11	2.84	+	3.88	0.000288	0.0142
nervous system process involved in regulation of systemic arterial blood pressure (GO:0001976)	12	5	0.46	+	10.86	0.00029	0.0143
glomerular epithelial cell development (GO:0072310)	12	5	0.46	+	10.86	0.00029	0.0143
positive regulation of ossification (GO:0045778)	50	9	1.92	+	4.69	0.000294	0.0144
morphogenesis of embryonic epithelium (GO:0016331)	144	16	5.52	+	2.9	0.000297	0.0145
regulation of potassium ion transport (GO:0043266)	101	13	3.87	+	3.36	0.000301	0.0147
glomerular epithelial cell differentiation (GO:0072311)	20	6	0.77	+	7.82	0.000305	0.0148
histone modification (GO:0016570)	357	29	13.69	+	2.12	0.000313	0.0151
macromolecule catabolic process (GO:0009057)	909	58	34.87	+	1.66	0.000312	0.0151
response to chemical (GO:0042221)	4055	198	155.55	+	1.27	0.000325	0.0156
regulation of ion transmembrane transport (GO:0034765)	481	36	18.45	+	1.95	0.000324	0.0156
positive regulation of epithelial cell proliferation (GO:0050679)	192	19	7.36	+	2.58	0.000328	0.0157
positive regulation of bone mineralization (GO:0030501)	40	8	1.53	+	5.21	0.000341	0.0162
regulation of sodium ion transport (GO:0002028)	89	12	3.41	+	3.52	0.000348	0.0165
response to growth factor (GO:0070848)	485	36	18.6	+	1.94	0.000348	0.0165
mesenchymal cell differentiation (GO:0048762)	162	17	6.21	+	2.74	0.000358	0.0169
covalent chromatin modification (GO:0016569)	362	29	13.89	+	2.09	0.000366	0.0172
cellular catabolic process (GO:0044248)	1615	91	61.95	+	1.47	0.000372	0.0175
enzyme linked receptor protein signaling pathway (GO:0007167)	598	42	22.94	+	1.83	0.00038	0.0177
ubiquitin-dependent protein catabolic process (GO:0006511)	525	38	20.14	+	1.89	0.00038	0.0178
positive regulation of peptidase activity (GO:0010952)	195	19	7.48	+	2.54	0.000391	0.0182
regulation of protein catabolic process (GO:0042176)	398	31	15.27	+	2.03	0.000394	0.0183
proteasomal protein catabolic process (GO:0010498)	344	28	13.2	+	2.12	0.000405	0.0187
negative regulation of cellular component organization (GO:0051129)	722	48	27.7	+	1.73	0.000415	0.0191
regulation of transmembrane transport (GO:0034762)	569	40	21.83	+	1.83	0.000435	0.02
chromatin organization (GO:0006325)	686	46	26.31	+	1.75	0.000442	0.0203
cytoskeleton organization (GO:0007010)	1169	70	44.84	+	1.56	0.000444	0.0203
action potential (GO:0001508)	92	12	3.53	+	3.4	0.000457	0.0208
blood vessel morphogenesis (GO:0048514)	404	31	15.5	+	2	0.000465	0.0211
regulation of phosphorylation (GO:0042325)	1236	73	47.41	+	1.54	0.000469	0.0213
detection of stimulus (GO:0051606)	694	10	26.62	-	0.38	0.000484	0.0219
response to lipid (GO:0033993)	829	53	31.8	+	1.67	0.000494	0.0223
peripheral nervous system development (GO:0007422)	80	11	3.07	+	3.58	0.000524	0.0235
tube development (GO:0035295)	845	54	32.41	+	1.67	0.000539	0.0241
protein modification by small protein conjugation or removal (GO:0070647)	849	54	32.57	+	1.66	0.000556	0.0248
embryonic epithelial tube formation (GO:0001838)	123	14	4.72	+	2.97	0.000558	0.0248
response to muscle stretch (GO:0035994)	23	6	0.88	+	6.8	0.000572	0.0251
peptidyl-amino acid modification (GO:0018193)	851	54	32.64	+	1.65	0.000567	0.0251
cellular response to growth factor stimulus (GO:0071363)	455	34	17.45	+	1.95	0.000566	0.0252
glomerular epithelium development (GO:0072010)	23	6	0.88	+	6.8	0.000572	0.0252
negative regulation of stem cell differentiation (GO:2000737)	23	6	0.88	+	6.8	0.000572	0.0252
defense response (GO:0006952)	1387	30	53.2	-	0.56	0.000594	0.026
response to carbohydrate (GO:0009743)	187	18	7.17	+	2.51	0.000628	0.0274
cellular macromolecule catabolic process (GO:0044265)	818	52	31.38	+	1.66	0.000639	0.0278
positive regulation of proteolysis (GO:0045862)	371	29	14.23	+	2.04	0.000655	0.0283
cellular localization (GO:0051641)	2264	119	86.84	+	1.37	0.000652	0.0283
modification-dependent protein catabolic process (GO:0019941)	536	38	20.56	+	1.85	0.000655	0.0283
cell communication by electrical coupling involved in cardiac conduction (GO:0086064)	15	5	0.58	+	8.69	0.000663	0.0285
atrial septum morphogenesis (GO:0060413)	15	5	0.58	+	8.69	0.000663	0.0286
regulation of cellular protein localization (GO:1903827)	538	38	20.64	+	1.84	0.00067	0.0287
apoptotic mitochondrial changes (GO:0008637)	57	9	2.19	+	4.12	0.000687	0.0293
epithelial cell differentiation involved in kidney development (GO:0035850)	34	7	1.3	+	5.37	0.000686	0.0293
transmembrane receptor protein tyrosine kinase signaling pathway (GO:0007169)	406	31	15.57	+	1.99	0.000706	0.03
regulation of cation channel activity (GO:2001257)	173	17	6.64	+	2.56	0.000711	0.0301
lymphatic endothelial cell differentiation (GO:0060836)	8	4	0.31	+	13.03	0.000722	0.0304
cardiac pacemaker cell development (GO:0060926)	8	4	0.31	+	13.03	0.000722	0.0305
sensory system development (GO:0048880)	376	29	14.42	+	2.01	0.000729	0.0306
positive regulation of protein metabolic process (GO:0051247)	1455	82	55.81	+	1.47	0.000728	0.0306
regulation of developmental growth (GO:0048638)	320	26	12.27	+	2.12	0.000733	0.0306
regulation of intracellular transport (GO:0032386)	343	27	13.16	+	2.05	0.000743	0.031
positive regulation of apoptotic process (GO:0043065)	509	36	19.52	+	1.84	0.000762	0.0317
modification-dependent macromolecule catabolic process (GO:0043632)	547	38	20.98	+	1.81	0.000768	0.0319
inflammatory response (GO:0006954)	502	6	19.26	-	0.31	0.000791	0.0326
positive regulation of cell death (GO:0010942)	587	40	22.52	+	1.78	0.000789	0.0326
gland development (GO:0048732)	414	31	15.88	+	1.95	0.000802	0.033
cellular response to hormone stimulus (GO:0032870)	484	35	18.57	+	1.89	0.000829	0.0339
positive regulation of cell communication (GO:0010647)	1632	90	62.6	+	1.44	0.000828	0.0339
regulation of cardiac conduction (GO:1903779)	25	6	0.96	+	6.26	0.000832	0.0339
cellular protein catabolic process (GO:0044257)	629	42	24.13	+	1.74	0.000827	0.0339
response to oxidative stress (GO:0006979)	382	29	14.65	+	1.98	0.000849	0.0345
nucleoside diphosphate phosphorylation (GO:0006165)	59	9	2.26	+	3.98	0.000857	0.0347
regulation of striated muscle cell differentiation (GO:0051153)	86	11	3.3	+	3.33	0.000901	0.0364
cellular component disassembly (GO:0022411)	275	23	10.55	+	2.18	0.000905	0.0365
regulation of endothelial cell differentiation (GO:0045601)	36	7	1.38	+	5.07	0.000923	0.0371
mitochondrial transport (GO:0006839)	207	19	7.94	+	2.39	0.000958	0.0384
regulation of cell development (GO:0060284)	495	35	18.99	+	1.84	0.000962	0.0385
glucose metabolic process (GO:0006006)	101	12	3.87	+	3.1	0.000966	0.0385
microtubule anchoring (GO:0034453)	26	6	1	+	6.02	0.000993	0.0395
cardiac ventricle formation (GO:0003211)	9	4	0.35	+	11.59	0.00101	0.0398
cardiac pacemaker cell differentiation (GO:0060920)	9	4	0.35	+	11.59	0.00101	0.0399
positive regulation of receptor binding (GO:1900122)	9	4	0.35	+	11.59	0.00101	0.04
regulation of heart morphogenesis (GO:2000826)	9	4	0.35	+	11.59	0.00101	0.0401
cellular response to oxygen-containing compound (GO:1901701)	1043	62	40.01	+	1.55	0.00101	0.0401
nucleotide phosphorylation (GO:0046939)	61	9	2.34	+	3.85	0.00106	0.0412
regulation of binding (GO:0051098)	368	28	14.12	+	1.98	0.00106	0.0412
sarcomere organization (GO:0045214)	37	7	1.42	+	4.93	0.00106	0.0412
pyruvate metabolic process (GO:0006090)	61	9	2.34	+	3.85	0.00106	0.0413
regulation of cell communication by electrical coupling (GO:0010649)	17	5	0.65	+	7.67	0.00106	0.0414
actin cytoskeleton organization (GO:0030036)	539	37	20.68	+	1.79	0.00108	0.0415
membrane depolarization during cardiac muscle cell action potential (GO:0086012)	17	5	0.65	+	7.67	0.00106	0.0415
protein modification by small protein conjugation (GO:0032446)	710	46	27.23	+	1.69	0.00108	0.0417
morphogenesis of an epithelium (GO:0002009)	437	32	16.76	+	1.91	0.00109	0.0419
regulation of nervous system development (GO:0051960)	438	32	16.8	+	1.9	0.0011	0.0424
positive regulation of biomineral tissue development (GO:0070169)	49	8	1.88	+	4.26	0.00111	0.0426
regulation of epithelial cell migration (GO:0010632)	230	20	8.82	+	2.27	0.00112	0.0428
cellular macromolecule localization (GO:0070727)	1386	78	53.17	+	1.47	0.00118	0.044
cell-cell signaling involved in cardiac conduction (GO:0086019)	27	6	1.04	+	5.79	0.00118	0.0441
locomotion (GO:0040011)	1195	69	45.84	+	1.51	0.00118	0.0441
protein localization (GO:0008104)	1901	101	72.92	+	1.39	0.00119	0.0441
regulation of cellular catabolic process (GO:0031329)	813	51	31.19	+	1.64	0.00117	0.0442
positive regulation of ATPase activity (GO:0032781)	27	6	1.04	+	5.79	0.00118	0.0442
cellular response to stress (GO:0033554)	1519	84	58.27	+	1.44	0.00116	0.0442
cell junction organization (GO:0034330)	477	34	18.3	+	1.86	0.00116	0.0443
purine nucleoside diphosphate metabolic process (GO:0009135)	62	9	2.38	+	3.78	0.00117	0.0443
regionalization (GO:0003002)	316	25	12.12	+	2.06	0.00119	0.0443
purine ribonucleoside diphosphate metabolic process (GO:0009179)	62	9	2.38	+	3.78	0.00117	0.0444
regulation of actin filament-based movement (GO:1903115)	38	7	1.46	+	4.8	0.00122	0.0452
positive regulation of cell projection organization (GO:0031346)	350	27	13.43	+	2.01	0.00125	0.0462
regulation of bone mineralization (GO:0030500)	76	10	2.92	+	3.43	0.00126	0.0462
positive regulation of biomineralization (GO:0110151)	50	8	1.92	+	4.17	0.00125	0.0463
neural tube closure (GO:0001843)	90	11	3.45	+	3.19	0.00126	0.0463
positive regulation of muscle cell differentiation (GO:0051149)	63	9	2.42	+	3.72	0.0013	0.0473
negative regulation of gene expression (GO:0010629)	879	54	33.72	+	1.6	0.00129	0.0473
artery morphogenesis (GO:0048844)	63	9	2.42	+	3.72	0.0013	0.0474
protein phosphorylation (GO:0006468)	683	44	26.2	+	1.68	0.00129	0.0474
proteolysis involved in cellular protein catabolic process (GO:0051603)	602	40	23.09	+	1.73	0.00131	0.0474
specification of animal organ identity (GO:0010092)	18	5	0.69	+	7.24	0.00131	0.0475
regulation of osteoblast differentiation (GO:0045667)	120	13	4.6	+	2.82	0.00131	0.0476
positive regulation of programmed cell death (GO:0043068)	524	36	20.1	+	1.79	0.00133	0.0478
regulation of ion transport (GO:0043269)	685	44	26.28	+	1.67	0.00133	0.0478
blood vessel development (GO:0001568)	486	34	18.64	+	1.82	0.00133	0.0479
positive regulation of cysteine-type endopeptidase activity (GO:2001056)	152	15	5.83	+	2.57	0.00138	0.0487
tube closure (GO:0060606)	91	11	3.49	+	3.15	0.00137	0.0487
sinoatrial node development (GO:0003163)	10	4	0.38	+	10.43	0.00138	0.0488
positive regulation of signaling (GO:0023056)	1639	89	62.87	+	1.42	0.00136	0.0488
regulation of postsynapse organization (GO:0099175)	91	11	3.49	+	3.15	0.00137	0.0488
modulation of age-related behavioral decline (GO:0090647)	10	4	0.38	+	10.43	0.00138	0.0489
histone acetylation (GO:0016573)	106	12	4.07	+	2.95	0.00141	0.0498

## Sheet: seg 5 > seg 3
	AUCPR	AUCPR.ratio	exp.fc	posFrac_1	posFrac_2	nTrans_1	nTrans_2
FITM1	0.834	3.64659	3.18507	0.917	0.313	1.342	0.225
PPP1R1A	0.812	3.5504	2.258	0.938	0.632	1.831	0.618
TCEA3	0.806	3.52417	3.7093	0.8	0.164	0.998	0.106
SHD	0.801	3.5023	3.00262	0.883	0.337	1.38	0.263
MB	0.785	3.43234	3.6823	0.814	0.19	1.267	0.15
KLHL41	0.777	3.39737	3.00376	0.89	0.292	1.377	0.262
CAPN3	0.775	3.38862	3.81994	0.8	0.204	1.28	0.139
C1orf105	0.77	3.36676	4.79566	0.628	0.059	0.681	0.031
SPHKAP	0.747	3.26619	2.87341	0.876	0.329	1.433	0.301
CIRBP	0.735	3.21372	1.21046	0.993	0.93	1.93	1.147
MYH6	0.735	3.21372	1.50117	0.993	0.867	3.305	2.049
KCNIP2	0.728	3.18312	3.05348	0.897	0.301	1.694	0.344
CKM	0.725	3.17	2.75774	0.903	0.405	1.996	0.528
ATP1A2	0.722	3.15688	3.65241	0.683	0.147	0.956	0.104
PAM	0.716	3.13065	1.34332	0.986	0.975	2.664	1.634
BTG1	0.715	3.12628	1.40627	0.966	0.843	1.789	0.946
MYH7B	0.698	3.05194	3.69305	0.614	0.115	0.666	0.064
MYBPC3	0.696	3.0432	1.64075	0.979	0.667	1.93	0.927
NRTN	0.688	3.00822	3.23421	0.69	0.133	0.708	0.094
RYR2	0.685	2.9951	1.47413	0.959	0.8	1.9	0.988
PDE4DIP	0.68	2.97324	2.13965	0.828	0.474	0.989	0.291
SCP2	0.671	2.93389	1.52763	0.903	0.73	1.279	0.58
TNFAIP8	0.668	2.92077	2.5731	0.71	0.264	0.692	0.142
TESC	0.663	2.89891	3.23489	0.641	0.139	0.652	0.085
NFIC	0.662	2.89454	1.96734	0.903	0.542	1.206	0.416
EEF1A2	0.654	2.85956	1.77806	0.931	0.54	1.327	0.526
FEZ1	0.652	2.85081	2.32565	0.724	0.35	0.82	0.205
CDK8	0.645	2.82021	3.47422	0.51	0.129	0.657	0.073
ENO3	0.644	2.81583	1.63308	0.876	0.636	1.251	0.531
APOBEC2	0.644	2.81583	2.63479	0.703	0.207	0.872	0.181
TRDN	0.641	2.80272	1.37129	0.931	0.738	1.72	0.916
CADPS2	0.64	2.79834	2.41928	0.793	0.313	0.996	0.246
CORIN	0.639	2.79397	3.14452	0.607	0.117	0.662	0.092
WNT5A	0.638	2.7896	2.59791	0.697	0.358	1.108	0.252
HIPK3	0.636	2.78086	1.99666	0.8	0.493	1.165	0.391
NR2F2	0.633	2.76774	1.37203	0.917	0.838	1.753	0.938
ESRRG	0.631	2.75899	2.15517	0.724	0.366	0.879	0.249
NRXN1	0.629	2.75025	3.08543	0.607	0.131	0.742	0.11
HSPB7	0.627	2.7415	1.3476	0.972	0.818	1.977	1.107
LINC00997	0.626	2.73713	3.35811	0.51	0.074	0.671	0.081
HSPB3	0.625	2.73276	2.29586	0.786	0.284	0.975	0.259
LINC00998	0.624	2.72839	3.22938	0.531	0.078	0.65	0.085
RASSF5	0.623	2.72401	2.0891	0.731	0.403	0.94	0.282
GOLIM4	0.622	2.71964	2.1703	0.793	0.458	1.199	0.365
BMP5	0.617	2.69778	1.37458	0.938	0.765	1.394	0.703
PLN	0.617	2.69778	1.19753	0.986	0.926	2.319	1.454
BMP7	0.615	2.68903	2.28576	0.772	0.294	0.934	0.247
NKX2-5	0.609	2.6628	2.5922	0.69	0.221	0.803	0.168
PROX1	0.604	2.64094	2.21209	0.697	0.297	0.718	0.188
ALDOA	0.603	2.63657	0.809524	0.986	0.975	2.119	1.54
DMD	0.602	2.63219	1.61341	0.821	0.591	1.131	0.474
RRAD	0.599	2.61908	2.38864	0.807	0.254	1.112	0.289
ASPH	0.597	2.61033	1.39769	0.897	0.722	1.26	0.613
LDHA	0.596	2.60596	1.46664	0.952	0.816	1.972	1.041
LAMA2	0.592	2.58847	1.75306	0.766	0.464	0.963	0.358
MPP6	0.592	2.58847	1.76444	0.745	0.505	0.973	0.36
A2M	0.592	2.58847	2.6238	0.731	0.235	1.423	0.348
ERCC-00136	0.591	2.5841	1.34801	0.917	0.826	1.422	0.731
CLGN	0.59	2.57972	2.34139	0.634	0.258	0.648	0.153
LPGAT1	0.589	2.57535	1.36155	0.841	0.718	1.182	0.579
SREBF2	0.589	2.57535	1.77031	0.703	0.575	1.044	0.391
TXNIP	0.586	2.56223	1.68929	0.945	0.613	1.723	0.777
TMX4	0.584	2.55349	1.70886	0.862	0.579	1.121	0.443
PITPNB	0.583	2.54912	1.23256	0.848	0.748	1.095	0.569
ERCC-00009	0.582	2.54474	1.08005	0.972	0.951	1.869	1.173
ATP1B2	0.581	2.54037	1.00192	0.931	0.881	1.671	1.064
BEX3	0.58	2.536	2.61801	0.669	0.106	1.639	0.427
RBPMS2	0.579	2.53163	1.00181	0.931	0.863	1.473	0.916
PTP4A3	0.576	2.51851	1.69854	0.738	0.515	0.864	0.325
ADAM11	0.573	2.50539	2.63926	0.51	0.188	0.477	0.088
PPP1R13B	0.569	2.4879	2.3185	0.572	0.233	0.53	0.123
MXI1	0.566	2.47479	1.84289	0.683	0.407	0.696	0.23
CRIP2	0.565	2.47041	0.840241	0.945	0.91	1.664	1.145
TMEM261	0.565	2.47041	2.71944	0.559	0.088	0.661	0.122
BNIP3	0.564	2.46604	1.4144	0.89	0.748	1.35	0.661
HRC	0.564	2.46604	1.64652	0.828	0.487	0.946	0.374
GPI	0.559	2.44418	0.894545	0.972	0.9	1.557	1.032
SOD2	0.559	2.44418	1.27563	0.807	0.644	0.882	0.431
CITED4	0.554	2.42232	1.78048	0.731	0.446	0.883	0.317
FIGN	0.554	2.42232	2.14003	0.607	0.346	0.718	0.197
HIST2H2BE	0.554	2.42232	2.27152	0.586	0.258	0.637	0.157
ADD3	0.553	2.41794	1.14027	0.945	0.834	1.549	0.906
PNRC1	0.553	2.41794	1.17821	0.91	0.808	1.45	0.82
MYOZ1	0.551	2.4092	2.57718	0.51	0.204	0.541	0.106
CPVL	0.549	2.40046	1.55706	0.71	0.507	0.785	0.317
TMOD1	0.549	2.40046	1.45665	0.752	0.493	0.76	0.325
ECHDC2	0.548	2.39608	2.30608	0.586	0.225	0.596	0.142
MGAT5	0.545	2.38297	1.5245	0.697	0.558	0.846	0.353
CACNA1D	0.544	2.37859	2.13194	0.628	0.249	0.684	0.187
ATPIF1	0.543	2.37422	1.03322	0.89	0.838	1.306	0.782
PDGFRA	0.542	2.36985	1.20043	0.876	0.771	1.387	0.768
COLQ	0.541	2.36548	2.16373	0.524	0.252	0.546	0.141
SHOX2	0.54	2.3611	2.14904	0.71	0.292	0.98	0.286
ERCC-00003	0.539	2.35673	1.04538	0.959	0.941	1.685	1.052
ERCC-00108	0.538	2.35236	1.00796	0.966	0.926	1.658	1.051
HADHB	0.536	2.34361	0.89859	0.869	0.836	1.193	0.757
NCAM1	0.536	2.34361	1.60095	0.938	0.624	1.629	0.757
BMP4	0.534	2.33487	1.98103	0.828	0.524	1.737	0.67
KLHL24	0.534	2.33487	1.46092	0.759	0.528	0.891	0.39
UQCRB	0.534	2.33487	1.17368	0.821	0.718	0.988	0.522
SH3RF2	0.534	2.33487	2.30719	0.51	0.241	0.534	0.125
COX20	0.53	2.31738	2.3908	0.572	0.207	0.688	0.159
YPEL3	0.529	2.31301	1.59897	0.703	0.436	0.717	0.278
ZBTB20	0.529	2.31301	2.41163	0.503	0.239	0.625	0.14
ATP5D	0.528	2.30863	1.08319	0.855	0.751	1.073	0.605
PRDX2	0.528	2.30863	0.786944	0.972	0.937	1.688	1.194
HSPB2	0.528	2.30863	2.1106	0.552	0.247	0.604	0.164
ALDOC	0.527	2.30426	2.06736	0.559	0.301	0.608	0.17
REEP3	0.526	2.29989	1.0692	0.869	0.732	1.032	0.583
ACOT13	0.525	2.29552	1.112	0.848	0.738	1.099	0.612
TNNT2	0.525	2.29552	0.623891	1	0.998	3.724	3.158
VSNL1	0.524	2.29114	1.81791	0.697	0.409	1.004	0.362
MLIP	0.524	2.29114	1.95581	0.628	0.294	0.62	0.187
RNF150	0.523	2.28677	1.55303	0.676	0.468	0.686	0.272
PLCB1	0.522	2.2824	1.49692	0.724	0.511	0.862	0.367
ITGB1BP2	0.521	2.27803	1.51622	0.731	0.483	0.793	0.329
ATP5H	0.52	2.27366	0.721661	0.952	0.945	1.63	1.183
COX5B	0.519	2.26928	0.850842	0.979	0.928	1.665	1.14
ABCC5	0.517	2.26054	1.68406	0.628	0.429	0.69	0.252
ERCC-00042	0.516	2.25617	0.845735	0.993	0.961	1.735	1.199
PPP1R12B	0.514	2.24742	0.935633	0.972	0.898	2.032	1.387
LOC642366	0.514	2.24742	1.98731	0.524	0.28	0.563	0.164
NORAD	0.514	2.24742	2.35228	0.579	0.1	0.815	0.2
TIMP3	0.512	2.23868	1.44269	0.828	0.556	1.133	0.525
SLIT2	0.51	2.22993	1.13288	0.931	0.836	1.897	1.165
TNNI1	0.509	2.22556	0.673332	1	0.998	3.031	2.459
ERCC-00043	0.507	2.21681	1.13099	0.834	0.765	1.12	0.619
ARL5A	0.506	2.21244	0.811998	0.917	0.847	1.201	0.799
LRRC75A-AS1	0.506	2.21244	2.2762	0.593	0.104	0.862	0.225
LHFPL2	0.505	2.20807	1.20465	0.731	0.632	0.903	0.462
LRRC16A	0.505	2.20807	2.03235	0.531	0.272	0.553	0.156
NDRG2	0.504	2.2037	1.31101	0.752	0.558	0.844	0.401
STAT3	0.504	2.2037	1.33546	0.697	0.558	0.727	0.333
SYNPO2	0.504	2.2037	1.50621	0.752	0.483	0.916	0.392
POPDC2	0.504	2.2037	0.986306	0.966	0.789	1.822	1.189
HNRNPDL	0.504	2.2037	2.25317	0.572	0.1	0.963	0.262
ERCC-00145	0.503	2.19932	1.11241	0.931	0.845	1.27	0.725
FBXO9	0.501	2.19058	0.919221	0.821	0.773	1.034	0.636
UBR3	0.501	2.19058	1.00073	0.821	0.757	1.091	0.646
ZC2HC1A	0.501	2.19058	1.02037	0.828	0.72	0.983	0.567
KIF1C	0.5	2.18621	0.958581	0.738	0.646	0.744	0.43
JMJD1C	0.499	2.18183	0.989988	0.876	0.802	1.279	0.781
TPI1	0.499	2.18183	0.629446	0.993	0.98	2.152	1.69
SNTA1	0.498	2.17746	1.02399	0.883	0.763	1.152	0.679
TMED4	0.498	2.17746	1.94848	0.593	0.317	0.674	0.207
NDUFC1	0.496	2.16872	0.752693	0.91	0.918	1.311	0.91
UQCRC2	0.495	2.16434	0.652236	0.938	0.881	1.321	0.966
ANAPC16	0.492	2.15123	0.980985	0.903	0.765	1.063	0.634
PKM	0.492	2.15123	0.492645	0.986	0.994	2.299	1.921
TBX2	0.492	2.15123	1.82194	0.621	0.364	0.749	0.254
RACK1	0.491	2.14686	2.20652	0.676	0.106	1.656	0.552
GBAS	0.49	2.14248	0.760551	0.897	0.855	1.18	0.805
CPEB4	0.489	2.13811	0.974357	0.869	0.779	1.222	0.747
PFKM	0.489	2.13811	0.82411	0.855	0.781	1.029	0.667
LINC00674	0.488	2.13374	0.801477	0.807	0.822	1.057	0.696
PBX1	0.488	2.13374	0.956568	0.945	0.838	1.459	0.927
AES	0.486	2.12499	0.709972	0.952	0.914	1.503	1.085
NDUFA5	0.484	2.11625	0.891382	0.855	0.787	1.096	0.69
SLC8A1	0.484	2.11625	0.838724	0.986	0.965	2.178	1.571
NDUFS2	0.483	2.11188	0.860555	0.903	0.804	1.169	0.755
NAP1L1	0.482	2.1075	0.461196	0.993	0.998	2.419	2.056
NFYC	0.482	2.1075	1.11016	0.731	0.65	0.787	0.418
ADPRHL1	0.481	2.10313	1.43544	0.869	0.507	1.277	0.61
FAM189A2	0.481	2.10313	1.80987	0.593	0.28	0.608	0.201
LDHB	0.481	2.10313	0.473176	0.986	0.994	2.374	2.005
PPP4R2	0.481	2.10313	1.8099	0.552	0.301	0.568	0.186
DENND1B	0.48	2.09876	1.46194	0.6	0.442	0.564	0.231
RPS17	0.479	2.09439	2.07409	0.6	0.106	1.03	0.319
NEK7	0.478	2.09001	1.06358	0.779	0.671	0.895	0.497
GPR37	0.477	2.08564	1.27094	0.8	0.611	1.094	0.556
LGALS3BP	0.476	2.08127	1.90954	0.683	0.178	0.695	0.22
PROS1	0.476	2.08127	1.28418	0.662	0.53	0.671	0.314
RASSF8	0.476	2.08127	1.37061	0.648	0.474	0.658	0.291
ARHGAP31	0.475	2.0769	1.54411	0.614	0.382	0.582	0.227
NREP	0.475	2.0769	0.55445	0.986	0.984	2.518	2.077
PPARGC1A	0.475	2.0769	1.3016	0.724	0.524	0.867	0.416
TOM1L2	0.474	2.07252	1.30666	0.69	0.509	0.664	0.306
AGL	0.473	2.06815	1.20507	0.703	0.566	0.784	0.393
SARAF	0.473	2.06815	1.83653	0.559	0.096	0.727	0.243
COL4A6	0.472	2.06378	1.02591	0.869	0.808	1.313	0.79
MT-TT	0.472	2.06378	1.68817	0.517	0.28	0.407	0.139
C12orf75	0.471	2.05941	1.41769	0.566	0.427	0.586	0.248
FXYD6	0.471	2.05941	1.07686	0.834	0.699	1.039	0.585
PDK2	0.471	2.05941	1.33322	0.683	0.515	0.703	0.321
QPRT	0.47	2.05503	1.05431	0.786	0.708	0.986	0.558
SOBP	0.47	2.05503	1.57987	0.559	0.354	0.566	0.215
UQCR11	0.469	2.05066	0.833608	0.903	0.822	1.082	0.702
ASB8	0.467	2.04192	1.43773	0.6	0.438	0.567	0.236
ATP5C1	0.466	2.03754	0.510234	0.993	0.973	1.716	1.381
USP2	0.466	2.03754	1.66097	0.531	0.303	0.496	0.176
ECH1	0.465	2.03317	0.676531	0.903	0.904	1.322	0.955
ST3GAL1	0.465	2.03317	1.19897	0.745	0.601	0.924	0.476
UQCR10	0.465	2.03317	0.729585	0.897	0.861	1.231	0.858
CCDC69	0.464	2.0288	1.46363	0.634	0.407	0.623	0.258
ACVR2B	0.462	2.02006	1.02852	0.69	0.607	0.75	0.416
GOT1	0.461	2.01568	0.93642	0.91	0.796	1.322	0.835
NDUFA11	0.461	2.01568	0.648469	0.897	0.885	1.18	0.854
NDUFB10	0.461	2.01568	0.852904	0.793	0.712	0.861	0.538
TNNI3	0.461	2.01568	1.51194	0.669	0.411	1.182	0.531
NDUFA8	0.46	2.01131	0.960638	0.71	0.65	0.776	0.45
SLC25A4	0.46	2.01131	0.879353	0.993	0.896	2.003	1.398
FRMD3	0.459	2.00694	1.7377	0.538	0.258	0.524	0.178
MDH1	0.459	2.00694	0.778537	0.986	0.941	2.073	1.521
CHCHD10	0.457	1.99819	0.745772	0.945	0.885	1.468	1.038
SLC25A12	0.457	1.99819	1.20512	0.731	0.566	0.845	0.428
ATF7IP	0.455	1.98945	1.076	0.759	0.644	0.923	0.511
PPM1K	0.455	1.98945	1.12332	0.772	0.65	1.019	0.557
SPAG7	0.455	1.98945	0.736468	0.8	0.775	0.938	0.632
SGCA	0.454	1.98508	1.38716	0.586	0.395	0.536	0.229
PLCB4	0.453	1.9807	1.48998	0.607	0.38	0.593	0.24
TECRL	0.453	1.9807	0.643147	0.993	0.99	3.027	2.48
COX6B1	0.452	1.97633	0.558096	0.972	0.975	1.606	1.256
B2M	0.451	1.97196	0.721423	0.897	0.865	1.3	0.916
COX7C	0.451	1.97196	0.478114	0.993	0.998	2.242	1.879
COX5A	0.45	1.96759	0.582724	0.966	0.959	1.8	1.41
ERCC-00111	0.45	1.96759	0.799398	0.903	0.924	1.361	0.927
MOAP1	0.45	1.96759	1.26013	0.572	0.425	0.549	0.255
PKIA	0.45	1.96759	1.05003	0.807	0.663	1.039	0.594
TMEM245	0.449	1.96321	0.622411	0.834	0.881	1.28	0.947
TMEM41A	0.448	1.95884	1.13659	0.538	0.505	0.544	0.273
CALCOCO1	0.446	1.9501	1.21481	0.641	0.489	0.586	0.282
MTUS1	0.446	1.9501	1.57146	0.669	0.346	0.693	0.272
VEGFB	0.445	1.94572	0.848282	0.841	0.742	0.963	0.611
GAS6	0.444	1.94135	1.43431	0.517	0.358	0.505	0.208
LAPTM4B	0.444	1.94135	0.430543	0.993	0.994	2.329	1.995
EPHA7	0.443	1.93698	1.42497	0.614	0.417	0.727	0.315
MGEA5	0.443	1.93698	0.788033	0.793	0.834	1.202	0.81
NDUFB4	0.442	1.93261	0.695618	0.938	0.89	1.223	0.867
RNPC3	0.442	1.93261	1.33163	0.614	0.479	0.683	0.311
TBX5	0.442	1.93261	0.707798	0.931	0.877	1.434	1.03
ISL1	0.44	1.92386	0.92995	0.897	0.773	1.653	1.088
ZDHHC2	0.44	1.92386	0.986552	0.662	0.595	0.714	0.404
GABARAPL2	0.439	1.91949	0.618557	0.862	0.875	1.146	0.84
SMPX	0.439	1.91949	0.838442	0.938	0.791	1.639	1.126
PRKAA2	0.438	1.91512	1.0711	0.69	0.573	0.731	0.394
SLC25A37	0.438	1.91512	1.41914	0.566	0.401	0.546	0.229
GSN	0.437	1.91074	1.33885	0.662	0.454	0.674	0.305
PTK2B	0.435	1.902	1.44718	0.607	0.417	0.746	0.32
EFNA1	0.434	1.89763	1.26492	0.6	0.417	0.521	0.24
ETFB	0.433	1.89326	1.01403	0.779	0.607	0.765	0.429
KAT6B	0.433	1.89326	1.31807	0.517	0.393	0.482	0.213
HIF3A	0.431	1.88451	1.24039	0.676	0.476	0.653	0.313
MTFR1L	0.431	1.88451	0.912961	0.669	0.638	0.695	0.41
DCAF6	0.43	1.88014	0.938649	0.634	0.544	0.61	0.35
PSD3	0.43	1.88014	1.04645	0.793	0.638	0.945	0.534
C14orf2	0.429	1.87577	0.599192	0.938	0.914	1.287	0.964
CLK1	0.429	1.87577	1.02964	0.634	0.53	0.573	0.309
FAM214A	0.429	1.87577	1.41416	0.538	0.372	0.538	0.226
GAB1	0.429	1.87577	0.969616	0.71	0.63	0.761	0.438
TDP2	0.429	1.87577	0.875572	0.759	0.673	0.783	0.478
CLSTN1	0.427	1.86702	0.87594	0.683	0.65	0.684	0.412
LAMB2	0.427	1.86702	0.927863	0.828	0.73	1.011	0.617
PCMTD1	0.427	1.86702	1.17524	0.669	0.538	0.68	0.341
MADD	0.426	1.86265	1.40734	0.51	0.321	0.42	0.173
AKAP9	0.425	1.85828	0.718647	0.848	0.822	1.203	0.841
ATP2A2	0.425	1.85828	0.721494	1	0.998	3.309	2.679
DST	0.425	1.85828	0.717666	0.738	0.777	1.12	0.777
MLLT6	0.425	1.85828	0.962897	0.614	0.53	0.581	0.327
NUDT4	0.425	1.85828	1.24966	0.648	0.456	0.662	0.316
ATP5B	0.424	1.8539	0.412506	1	0.998	2.623	2.286
PNISR	0.423	1.84953	0.608777	0.855	0.902	1.364	1.023
CFLAR	0.422	1.84516	0.681957	0.793	0.81	1.088	0.767
THAP4	0.421	1.84079	1.30728	0.552	0.395	0.481	0.214
DCAF11	0.42	1.83641	1.17017	0.545	0.462	0.523	0.256
HOMER1	0.42	1.83641	1.01457	0.634	0.517	0.63	0.346
MCRS1	0.42	1.83641	0.936388	0.766	0.646	0.732	0.428
VEGFC	0.42	1.83641	1.31307	0.586	0.415	0.645	0.295
ATP5I	0.418	1.82767	0.843445	0.772	0.699	0.825	0.516
FGD6	0.418	1.82767	0.92376	0.614	0.591	0.657	0.383
FXYD1	0.418	1.82767	1.39819	0.51	0.333	0.464	0.194
SRSF5	0.418	1.82767	0.766771	0.752	0.734	0.848	0.556
ERCC-00022	0.417	1.8233	0.987847	0.669	0.595	0.684	0.385
NDUFA1	0.417	1.8233	0.564509	0.952	0.935	1.381	1.06
NEAT1	0.417	1.8233	1.3085	0.69	0.495	1.053	0.52
PSME1	0.417	1.8233	0.79871	0.69	0.654	0.734	0.466
ZNF302	0.417	1.8233	1.3836	0.503	0.346	0.46	0.194
CTDSP1	0.415	1.81455	1.14354	0.531	0.456	0.489	0.242
GPX3	0.414	1.81018	1.20831	0.517	0.411	0.506	0.241
NDUFB7	0.414	1.81018	0.789915	0.71	0.677	0.742	0.474
DCUN1D1	0.413	1.80581	1.30547	0.538	0.407	0.503	0.225
KLHDC3	0.413	1.80581	0.47413	0.903	0.957	1.41	1.133
TRPM7	0.413	1.80581	0.888449	0.621	0.587	0.638	0.379
ARL6IP5	0.412	1.80143	0.471559	0.91	0.939	1.429	1.151
NDUFB1	0.412	1.80143	0.988728	0.662	0.622	0.734	0.416
CISD1	0.411	1.79706	0.812665	0.779	0.722	0.901	0.579
SUCO	0.411	1.79706	0.762277	0.697	0.687	0.786	0.513
PPP1R16A	0.41	1.79269	1.092	0.545	0.44	0.458	0.233
SLC7A2	0.41	1.79269	0.815072	0.738	0.732	1.001	0.65
PDHA1	0.409	1.78832	0.594728	0.938	0.881	1.414	1.072
TFDP2	0.409	1.78832	1.00359	0.641	0.538	0.659	0.366
B3GALNT1	0.407	1.77957	1.10213	0.552	0.476	0.544	0.279
ECI1	0.407	1.77957	0.812018	0.683	0.638	0.697	0.437
GPC1	0.407	1.77957	0.991956	0.676	0.575	0.658	0.368
LMO4	0.407	1.77957	0.829131	0.848	0.775	1.111	0.725
MPC2	0.407	1.77957	0.911802	0.676	0.593	0.637	0.373
ZNF521	0.407	1.77957	1.28834	0.545	0.36	0.5	0.226
FAM162A	0.406	1.7752	0.895721	0.752	0.679	0.848	0.516
COX6C	0.405	1.77083	0.439137	0.966	0.971	1.648	1.364
MLF1	0.405	1.77083	0.93958	0.641	0.573	0.677	0.392
MRPS25	0.404	1.76646	0.99236	0.6	0.519	0.529	0.29
MITF	0.403	1.76208	1.01354	0.779	0.609	0.969	0.56
WDR6	0.403	1.76208	0.709119	0.759	0.736	0.779	0.524
BPTF	0.402	1.75771	0.611826	0.848	0.83	1.115	0.818
H1F0	0.402	1.75771	1.00074	0.69	0.599	0.742	0.418
EFR3A	0.401	1.75334	0.901236	0.676	0.605	0.712	0.424
FHOD3	0.401	1.75334	0.855161	0.697	0.634	0.817	0.507
PCM1	0.401	1.75334	0.604553	0.848	0.855	1.08	0.793
C14orf159	0.4	1.74897	1.19202	0.552	0.409	0.541	0.262
MT-TK	0.4	1.74897	0.836832	0.648	0.679	0.812	0.509
NDUFV2	0.4	1.74897	0.473035	0.917	0.926	1.308	1.045
FBXO32	0.399	1.74459	1.29965	0.662	0.329	0.758	0.357
FBXL17	0.398	1.74022	1.13809	0.572	0.417	0.493	0.245
VPS8	0.398	1.74022	1.08004	0.538	0.491	0.56	0.292
DEK	0.396	1.73148	0.755997	0.828	0.773	1.1	0.746
PLEKHA5	0.396	1.73148	0.672514	0.724	0.759	0.888	0.617
SMARCD3	0.396	1.73148	0.733816	0.759	0.697	0.763	0.505
NCOA1	0.395	1.7271	0.715972	0.724	0.718	0.812	0.546
HIGD2A	0.394	1.72273	0.64367	0.786	0.773	0.846	0.595
ZBTB44	0.393	1.71836	1.05043	0.586	0.472	0.554	0.294
NNT	0.392	1.71399	0.749169	0.821	0.748	1.002	0.675
MTUS2	0.392	1.71399	1.08763	0.641	0.45	0.573	0.298
CD59	0.391	1.70961	0.530985	0.862	0.873	1.178	0.906
CDC14B	0.391	1.70961	0.843945	0.69	0.613	0.663	0.406
MAGEF1	0.391	1.70961	0.796851	0.71	0.644	0.681	0.43
CACUL1	0.39	1.70524	0.608806	0.717	0.751	0.776	0.553
COX14	0.39	1.70524	1.11742	0.538	0.423	0.452	0.226
HDAC9	0.39	1.70524	1.03604	0.641	0.503	0.646	0.351
MT-ND4L	0.39	1.70524	0.490025	0.972	0.988	2.393	2.01
NDUFA13	0.39	1.70524	0.553831	0.821	0.828	0.905	0.673
ATP5L	0.389	1.70087	0.413018	0.952	0.971	1.607	1.343
BNIP2	0.389	1.70087	0.946796	0.545	0.528	0.548	0.31
OAZ2	0.389	1.70087	0.754713	0.814	0.748	0.91	0.605
ERBB4	0.388	1.6965	1.0617	0.662	0.519	0.709	0.383
KLHDC2	0.388	1.6965	0.805974	0.607	0.558	0.546	0.337
PLAG1	0.388	1.6965	1.07559	0.641	0.466	0.609	0.321
HIST1H2BK	0.387	1.69212	1.16072	0.572	0.425	0.601	0.3
ATP5O	0.386	1.68775	0.471161	0.972	0.969	1.776	1.459
MTRNR2L1	0.386	1.68775	0.644473	0.855	0.857	1.154	0.835
PLCL2	0.386	1.68775	0.98286	0.593	0.55	0.666	0.375
RNF207	0.386	1.68775	1.19091	0.545	0.393	0.535	0.259
STRN	0.386	1.68775	0.619192	0.821	0.793	0.955	0.688
EPM2AIP1	0.385	1.68338	0.532736	0.903	0.881	1.161	0.891
PPCS	0.385	1.68338	1.04031	0.559	0.444	0.497	0.263
KIFAP3	0.384	1.67901	0.638076	0.766	0.761	0.941	0.67
RASL10B	0.384	1.67901	0.857892	0.703	0.581	0.749	0.46
SMAD9	0.384	1.67901	0.966377	0.6	0.521	0.618	0.349
NEXN	0.383	1.67463	0.532762	0.931	0.885	1.528	1.203
ANKRD26	0.382	1.67026	0.808384	0.593	0.597	0.65	0.406
KIAA0319L	0.382	1.67026	0.698511	0.745	0.712	0.739	0.498
LUC7L3	0.382	1.67026	0.498385	0.897	0.881	1.322	1.044
SERINC1	0.382	1.67026	0.422785	0.834	0.859	1.035	0.834
TRH	0.382	1.67026	0.944985	0.828	0.699	1.485	0.952
ERCC-00060	0.381	1.66589	0.619361	0.979	0.978	1.571	1.191
NFYB	0.381	1.66589	0.943967	0.566	0.521	0.552	0.313
PABPC4	0.381	1.66589	0.476262	0.917	0.908	1.267	1.008
TAB2	0.381	1.66589	0.604634	0.752	0.765	0.799	0.572
TP53BP2	0.381	1.66589	0.743557	0.614	0.585	0.569	0.366
CWC27	0.38	1.66152	0.813306	0.545	0.583	0.568	0.35
SLC25A11	0.38	1.66152	0.85196	0.69	0.591	0.678	0.414
HAND2	0.38	1.66152	0.555518	0.959	0.904	1.64	1.287
ASH1L	0.379	1.65714	0.676162	0.703	0.722	0.795	0.546
BAZ2B	0.379	1.65714	0.647917	0.738	0.767	0.978	0.695
CBLB	0.379	1.65714	0.912838	0.545	0.505	0.563	0.326
COX7A2L	0.379	1.65714	0.418133	0.766	0.822	0.886	0.709
HADHA	0.379	1.65714	0.455981	0.814	0.853	1.078	0.856
NDUFB9	0.379	1.65714	0.519608	0.91	0.885	1.276	0.994
RB1CC1	0.379	1.65714	0.613725	0.731	0.732	0.825	0.589
VAMP2	0.379	1.65714	0.59153	0.931	0.898	1.303	0.981
ARIH2	0.378	1.65277	0.569542	0.634	0.683	0.643	0.463
C2orf68	0.378	1.65277	0.954837	0.538	0.472	0.496	0.277
LDB3	0.378	1.65277	0.953144	0.945	0.722	1.705	1.116
ZFP36L2	0.378	1.65277	1.11122	0.593	0.436	0.579	0.297
FABP3	0.377	1.6484	0.746117	0.793	0.693	0.854	0.567
MDH2	0.377	1.6484	0.490252	0.828	0.859	1.089	0.85
MT-TL1	0.377	1.6484	0.797917	0.559	0.548	0.572	0.356
FBXO11	0.376	1.64403	0.620678	0.641	0.691	0.691	0.485
FAM63B	0.375	1.63966	0.635732	0.593	0.607	0.587	0.404
KIDINS220	0.375	1.63966	0.438174	0.841	0.861	1.106	0.888
SAT2	0.375	1.63966	1.02883	0.503	0.411	0.402	0.211
UBL3	0.375	1.63966	0.947483	0.517	0.442	0.437	0.243
USP13	0.375	1.63966	0.769513	0.641	0.607	0.665	0.426
SEMA3C	0.375	1.63966	1.01142	0.648	0.542	0.81	0.458
MKRN1	0.374	1.63528	0.496692	0.869	0.867	1.14	0.89
NDUFB8	0.374	1.63528	0.433753	0.793	0.826	0.892	0.708
SPEG	0.374	1.63528	0.660435	0.786	0.755	0.979	0.691
EFCAB2	0.372	1.62654	1.05856	0.503	0.413	0.44	0.228
SLC16A7	0.372	1.62654	0.977297	0.545	0.446	0.484	0.266
MEF2A	0.37	1.61779	0.446343	0.917	0.902	1.291	1.044
NDUFS8	0.37	1.61779	0.619425	0.641	0.658	0.587	0.408
VWDE	0.37	1.61779	0.63942	0.855	0.787	1.317	0.969
WBP2	0.369	1.61342	0.448632	0.869	0.84	0.981	0.777
ZBTB4	0.369	1.61342	0.845264	0.538	0.468	0.446	0.265
CES2	0.368	1.60905	0.780727	0.614	0.589	0.621	0.393
DECR1	0.368	1.60905	0.542241	0.724	0.748	0.817	0.607
RCAN2	0.368	1.60905	0.832805	0.552	0.562	0.705	0.437
TNRC6B	0.368	1.60905	0.547246	0.869	0.828	1.017	0.766
ATP1B1	0.367	1.60468	0.632516	0.917	0.843	1.347	0.997
HK1	0.367	1.60468	0.417999	0.91	0.902	1.28	1.049
HMGN3	0.367	1.60468	0.493369	0.89	0.898	1.137	0.889
SYNGR1	0.367	1.60468	0.948965	0.586	0.511	0.529	0.298
EIF3K	0.366	1.6003	0.467458	0.828	0.863	1.007	0.791
FRYL	0.366	1.6003	0.785226	0.559	0.542	0.532	0.332
NDUFB5	0.366	1.6003	0.42915	0.917	0.935	1.274	1.038
IDH3B	0.365	1.59593	0.614634	0.621	0.65	0.646	0.453
KIAA0232	0.365	1.59593	0.559336	0.717	0.746	0.813	0.598
MPPED2	0.365	1.59593	0.89372	0.614	0.534	0.615	0.363
MRPL21	0.364	1.59156	0.71142	0.593	0.601	0.55	0.36
ACTR1B	0.363	1.58719	0.650608	0.559	0.616	0.531	0.36
COMMD3	0.363	1.58719	0.831444	0.51	0.466	0.469	0.282
TSPAN2	0.363	1.58719	0.531338	0.848	0.83	1.177	0.905
ALKBH5	0.362	1.58281	0.576445	0.759	0.81	0.884	0.648
CADPS	0.362	1.58281	1.06999	0.572	0.368	0.595	0.314
ERCC-00076	0.362	1.58281	0.749301	0.641	0.656	0.659	0.427
ERCC-00092	0.362	1.58281	0.803586	0.607	0.605	0.632	0.395
ERCC-00095	0.362	1.58281	0.856571	0.614	0.589	0.593	0.357
HIBCH	0.362	1.58281	0.535649	0.552	0.636	0.515	0.374
NDUFS7	0.362	1.58281	0.716693	0.641	0.618	0.633	0.417
TMEM106B	0.362	1.58281	0.520839	0.8	0.818	0.961	0.731
ADCY6	0.361	1.57844	0.768345	0.593	0.552	0.555	0.351
PPP1R3C	0.361	1.57844	1.12439	0.572	0.387	0.578	0.294
SREK1IP1	0.361	1.57844	0.549329	0.703	0.708	0.726	0.533
VPS28	0.361	1.57844	0.598425	0.669	0.687	0.672	0.477
AK1	0.36	1.57407	0.726955	0.676	0.609	0.611	0.399
KCNH2	0.36	1.57407	0.957208	0.517	0.429	0.485	0.27
SPIN1	0.36	1.57407	0.578299	0.766	0.724	0.793	0.576
IRF2BPL	0.359	1.5697	0.694024	0.669	0.642	0.671	0.45
MYH11	0.359	1.5697	0.856596	0.766	0.671	1.802	1.247
IDH3A	0.358	1.56532	0.818441	0.69	0.573	0.72	0.451
NBEA	0.358	1.56532	0.714517	0.669	0.654	0.784	0.526
RNF8	0.358	1.56532	0.731918	0.572	0.583	0.571	0.37
ARFGEF2	0.357	1.56095	0.692707	0.593	0.611	0.588	0.391
ANK2	0.356	1.55658	0.731355	0.545	0.552	0.552	0.357
FIS1	0.356	1.55658	0.581195	0.614	0.667	0.573	0.407
CRYAB	0.355	1.55221	0.700727	0.938	0.832	1.797	1.335
FAM20B	0.355	1.55221	0.824225	0.538	0.499	0.467	0.282
HDAC5	0.355	1.55221	0.550587	0.655	0.648	0.618	0.449
HDHD2	0.355	1.55221	0.892433	0.51	0.446	0.431	0.248
NRP1	0.355	1.55221	0.513203	0.772	0.793	1.082	0.834
PIP4K2A	0.355	1.55221	0.592849	0.621	0.671	0.691	0.493
RBM38	0.355	1.55221	0.924928	0.738	0.54	0.775	0.459
TAF7	0.355	1.55221	0.400108	0.834	0.89	1.035	0.844
TBC1D4	0.354	1.54783	0.823494	0.51	0.472	0.524	0.319
CCDC8	0.353	1.54346	0.725655	0.49	0.501	0.467	0.3
CORO6	0.353	1.54346	0.628357	0.731	0.677	0.817	0.578
HIPK1	0.353	1.54346	0.654151	0.572	0.609	0.553	0.375
NDUFS3	0.353	1.54346	0.602397	0.724	0.708	0.692	0.491
DPP8	0.352	1.53909	0.68468	0.538	0.581	0.516	0.342
MMP15	0.352	1.53909	0.749278	0.669	0.613	0.669	0.434
PRNP	0.352	1.53909	0.750702	0.51	0.526	0.468	0.296
WDR59	0.352	1.53909	0.811702	0.531	0.479	0.462	0.281
COMMD6	0.351	1.53472	0.527598	0.676	0.706	0.655	0.484
MRPS5	0.351	1.53472	0.546684	0.524	0.609	0.517	0.373
GSTM4	0.35	1.53034	0.724517	0.586	0.569	0.593	0.387
OBSL1	0.35	1.53034	0.475321	0.793	0.814	0.927	0.721
PGM1	0.35	1.53034	0.473497	0.841	0.804	1.016	0.796
PPIC	0.35	1.53034	0.426875	0.8	0.828	1.002	0.804
TULP3	0.35	1.53034	0.752678	0.51	0.517	0.479	0.303
ZNF91	0.349	1.52597	0.52433	0.676	0.74	0.788	0.59
ACADM	0.348	1.5216	0.61118	0.662	0.654	0.626	0.439
ARFGAP2	0.348	1.5216	0.696158	0.545	0.519	0.456	0.298
DNAJC19	0.348	1.5216	0.769602	0.538	0.505	0.443	0.276
PHTF2	0.348	1.5216	0.713091	0.503	0.515	0.465	0.301
SMO	0.348	1.5216	0.795227	0.531	0.519	0.482	0.297
SUCLG1	0.348	1.5216	0.438185	0.793	0.808	0.869	0.687
ERCC-00162	0.347	1.51723	0.91056	0.51	0.468	0.506	0.291
RPS6KA2	0.347	1.51723	0.54974	0.683	0.697	0.853	0.633
CACNB2	0.346	1.51286	0.65206	0.614	0.577	0.609	0.416
COPS5	0.346	1.51286	0.5853	0.593	0.605	0.569	0.403
RBMS1	0.346	1.51286	0.494742	0.89	0.875	1.114	0.869
SOX12	0.346	1.51286	0.701895	0.559	0.554	0.475	0.31
AHDC1	0.344	1.50411	0.801632	0.552	0.501	0.493	0.303
PEAK1	0.343	1.49974	0.59659	0.552	0.593	0.57	0.401
SDHB	0.343	1.49974	0.503585	0.634	0.71	0.693	0.521
SLK	0.343	1.49974	0.705308	0.634	0.593	0.636	0.422
ZBED5	0.343	1.49974	0.71168	0.634	0.607	0.61	0.402
ACADVL	0.342	1.49537	0.479344	0.779	0.783	0.833	0.642
IGBP1	0.342	1.49537	0.603604	0.655	0.636	0.622	0.438
PERP	0.342	1.49537	0.489382	0.697	0.716	0.73	0.555
PNKD	0.342	1.49537	0.523931	0.669	0.673	0.683	0.507
RBM26	0.342	1.49537	0.432241	0.628	0.744	0.693	0.543
TNRC18	0.342	1.49537	0.775334	0.559	0.511	0.505	0.316
CBX6	0.341	1.49099	0.7443	0.676	0.581	0.64	0.415
KDM4B	0.341	1.49099	0.524171	0.628	0.613	0.574	0.422
CTDSP2	0.34	1.48662	0.4932	0.703	0.775	0.796	0.607
DNAJB9	0.34	1.48662	0.61867	0.628	0.587	0.565	0.392
HTRA1	0.34	1.48662	0.722893	0.807	0.669	1.19	0.829
SMARCC2	0.34	1.48662	0.6054	0.634	0.642	0.636	0.448
CLASP1	0.339	1.48225	0.607427	0.614	0.652	0.622	0.437
ELMOD2	0.339	1.48225	0.70579	0.531	0.524	0.479	0.312
MPC1	0.339	1.48225	0.540175	0.69	0.716	0.758	0.561
NRSN2	0.339	1.48225	0.602649	0.483	0.513	0.416	0.287
MRPS18B	0.338	1.47788	0.597771	0.566	0.593	0.565	0.397
MT-TM	0.338	1.47788	0.885649	0.586	0.569	0.637	0.379
PREPL	0.338	1.47788	0.567253	0.614	0.648	0.583	0.418
USF2	0.338	1.47788	0.671334	0.559	0.569	0.512	0.342
C4orf3	0.337	1.4735	0.42759	0.883	0.83	0.953	0.762
GRINA	0.337	1.4735	0.44646	0.703	0.751	0.707	0.55
KANK1	0.337	1.4735	0.64763	0.724	0.675	0.775	0.54
PRKACA	0.337	1.4735	0.544664	0.697	0.683	0.678	0.497
ZFAND3	0.337	1.4735	0.465379	0.593	0.654	0.531	0.403
MAVS	0.336	1.46913	0.460903	0.683	0.734	0.704	0.543
FHL2	0.335	1.46476	0.806354	0.545	0.452	0.534	0.329
GSTK1	0.335	1.46476	0.507001	0.71	0.695	0.688	0.516
NDUFS4	0.335	1.46476	0.409388	0.676	0.751	0.659	0.522
BAG3	0.334	1.46039	0.524298	0.71	0.716	0.793	0.594
DCAF8	0.334	1.46039	0.654835	0.614	0.591	0.556	0.377
EFNB3	0.334	1.46039	0.781206	0.628	0.507	0.605	0.382
KIF21A	0.334	1.46039	0.496051	0.641	0.675	0.665	0.501
MDM4	0.334	1.46039	0.478155	0.662	0.73	0.702	0.536
TRIM2	0.334	1.46039	0.77173	0.51	0.438	0.439	0.273
ZNF362	0.334	1.46039	0.750539	0.621	0.519	0.542	0.346
ZNF518A	0.334	1.46039	0.536877	0.545	0.599	0.539	0.392
MRPL15	0.333	1.45601	0.400261	0.752	0.802	0.879	0.71
NDFIP2	0.333	1.45601	0.679223	0.566	0.54	0.493	0.327
RPRD2	0.333	1.45601	0.672255	0.621	0.603	0.57	0.383
ARGLU1	0.332	1.45164	0.454077	0.807	0.785	0.869	0.681
ARMCX6	0.332	1.45164	0.473717	0.745	0.763	0.762	0.586
CXXC4	0.332	1.45164	0.791887	0.517	0.47	0.522	0.324
PPM1A	0.332	1.45164	0.462455	0.607	0.638	0.549	0.418
RNF139	0.332	1.45164	0.662965	0.497	0.507	0.417	0.277
SIRPA	0.332	1.45164	0.644445	0.552	0.524	0.511	0.347
ZNF827	0.332	1.45164	0.640085	0.648	0.636	0.689	0.478
LOC100506548	0.331	1.44727	0.493522	0.662	0.681	0.654	0.493
LRRC47	0.331	1.44727	0.480232	0.524	0.546	0.433	0.323
MFN2	0.331	1.44727	0.439587	0.579	0.656	0.584	0.452
STT3B	0.331	1.44727	0.785653	0.545	0.519	0.608	0.383
UBQLN2	0.331	1.44727	0.418162	0.593	0.652	0.572	0.448
UBXN1	0.331	1.44727	0.537507	0.49	0.575	0.468	0.338
DAZAP2	0.33	1.4429	0.527439	0.662	0.675	0.628	0.463
MEF2D	0.33	1.4429	0.748672	0.51	0.474	0.442	0.279
MIEN1	0.33	1.4429	0.47166	0.559	0.611	0.505	0.381
ZNF148	0.33	1.4429	0.617447	0.552	0.556	0.503	0.347
ABCD3	0.329	1.43852	0.572607	0.503	0.53	0.429	0.302
ACAA1	0.329	1.43852	0.666503	0.524	0.497	0.438	0.291
MRPL34	0.329	1.43852	0.473493	0.745	0.757	0.784	0.604
NDUFAF3	0.329	1.43852	0.531716	0.614	0.601	0.502	0.365
NFAT5	0.329	1.43852	0.429582	0.738	0.773	0.797	0.63
SERINC3	0.329	1.43852	0.541716	0.593	0.622	0.585	0.426
SPOP	0.329	1.43852	0.510373	0.676	0.663	0.622	0.463
CD47	0.328	1.43415	0.703638	0.586	0.554	0.634	0.421
CEP350	0.328	1.43415	0.481364	0.614	0.652	0.627	0.475
CLOCK	0.328	1.43415	0.469307	0.628	0.667	0.634	0.484
LPCAT4	0.328	1.43415	0.669747	0.455	0.513	0.486	0.324
PDHX	0.328	1.43415	0.64474	0.483	0.524	0.438	0.295
PRKAR2B	0.328	1.43415	0.743855	0.6	0.542	0.647	0.42
C6orf89	0.327	1.42978	0.753904	0.503	0.436	0.398	0.249
CYB5A	0.327	1.42978	0.686589	0.552	0.546	0.498	0.329
GLCCI1	0.327	1.42978	0.718889	0.51	0.489	0.471	0.304
MPHOSPH8	0.327	1.42978	0.476784	0.628	0.636	0.57	0.431
MRPL10	0.327	1.42978	0.509927	0.593	0.605	0.519	0.383
NDUFA10	0.327	1.42978	0.477047	0.683	0.695	0.633	0.481
RHBDD2	0.327	1.42978	0.428649	0.655	0.706	0.66	0.517
RPAIN	0.327	1.42978	0.52431	0.614	0.622	0.539	0.395
THSD7A	0.327	1.42978	0.643405	0.731	0.658	0.876	0.618
TMEM131	0.327	1.42978	0.592987	0.566	0.554	0.504	0.353
TSC22D4	0.327	1.42978	0.721613	0.524	0.483	0.46	0.296
ZNF385B	0.327	1.42978	0.785371	0.614	0.466	0.602	0.379
BOD1L1	0.326	1.42541	0.560313	0.655	0.65	0.68	0.494
MLLT3	0.326	1.42541	0.815952	0.517	0.427	0.491	0.299
NAPA	0.326	1.42541	0.590727	0.503	0.544	0.457	0.319
PHF3	0.326	1.42541	0.523573	0.648	0.681	0.707	0.526
WASL	0.326	1.42541	0.525974	0.51	0.554	0.445	0.323
ATPAF1	0.325	1.42103	0.628789	0.51	0.497	0.424	0.288
CLASP2	0.325	1.42103	0.540498	0.607	0.613	0.548	0.398
IREB2	0.325	1.42103	0.414398	0.621	0.677	0.583	0.458
TMBIM4	0.325	1.42103	0.410999	0.683	0.755	0.733	0.583
ZNF292	0.325	1.42103	0.504569	0.634	0.679	0.716	0.539
ZNF471	0.325	1.42103	0.523132	0.524	0.63	0.584	0.43
FAM217B	0.324	1.41666	0.608427	0.483	0.503	0.448	0.309
GAMT	0.324	1.41666	0.697831	0.552	0.491	0.455	0.297
MTR	0.324	1.41666	0.557505	0.538	0.599	0.56	0.403
SOX11	0.324	1.41666	0.54238	0.579	0.626	0.672	0.493
TMEM127	0.324	1.41666	0.49468	0.579	0.634	0.558	0.417
WWP1	0.324	1.41666	0.723902	0.51	0.515	0.49	0.316
ARID2	0.323	1.41229	0.506291	0.752	0.712	0.748	0.564
CIR1	0.323	1.41229	0.557948	0.462	0.513	0.409	0.29
LARP7	0.323	1.41229	0.484113	0.669	0.663	0.633	0.479
TNNC1	0.323	1.41229	0.565813	0.986	0.902	2.045	1.638
BAG1	0.322	1.40792	0.517542	0.6	0.599	0.533	0.392
CERK	0.322	1.40792	0.548315	0.566	0.587	0.467	0.335
OXA1L	0.322	1.40792	0.418984	0.69	0.734	0.747	0.592
PHF1	0.322	1.40792	0.495735	0.593	0.597	0.507	0.377
VLDLR	0.322	1.40792	0.673671	0.579	0.544	0.548	0.367
FBLIM1	0.321	1.40354	0.583771	0.69	0.636	0.681	0.488
FZD3	0.321	1.40354	0.440956	0.524	0.607	0.536	0.413
SUCLA2	0.321	1.40354	0.465625	0.538	0.56	0.451	0.34
XRN1	0.321	1.40354	0.604046	0.517	0.536	0.484	0.336
HMBOX1	0.32	1.39917	0.525332	0.531	0.579	0.462	0.336
OTUD4	0.32	1.39917	0.434067	0.545	0.605	0.489	0.377
RMND5A	0.32	1.39917	0.486321	0.572	0.646	0.582	0.438
WIPF3	0.32	1.39917	0.503491	0.614	0.593	0.589	0.439
NEK9	0.319	1.3948	0.508826	0.566	0.593	0.507	0.374
XAF1	0.319	1.3948	0.63661	0.497	0.556	0.517	0.353
CPSF6	0.318	1.39043	0.46061	0.628	0.663	0.611	0.468
PURA	0.318	1.39043	0.603144	0.538	0.528	0.481	0.334
ZZZ3	0.318	1.39043	0.665488	0.497	0.503	0.432	0.287
PIAS1	0.317	1.38606	0.65198	0.49	0.505	0.447	0.3
MOCS2	0.316	1.38168	0.621391	0.51	0.544	0.464	0.318
ZNF358	0.316	1.38168	0.562839	0.49	0.503	0.417	0.295
MYL3	0.316	1.38168	0.837087	0.669	0.534	1.295	0.859
COPS7A	0.315	1.37731	0.534631	0.51	0.515	0.426	0.307
MRFAP1L1	0.315	1.37731	0.475322	0.579	0.616	0.515	0.388
CEP57	0.314	1.37294	0.487675	0.552	0.616	0.52	0.389
PBXIP1	0.314	1.37294	0.687203	0.545	0.466	0.442	0.29
STAM2	0.314	1.37294	0.547919	0.476	0.53	0.42	0.3
JAK1	0.313	1.36857	0.44037	0.641	0.671	0.641	0.498
PIAS2	0.313	1.36857	0.587703	0.497	0.536	0.478	0.335
PLIN3	0.313	1.36857	0.410892	0.641	0.703	0.622	0.491
SIX5	0.313	1.36857	0.512413	0.572	0.599	0.565	0.418
PPP1R14C	0.313	1.36857	0.69834	0.503	0.419	0.5	0.328
APPL1	0.312	1.36419	0.523695	0.476	0.554	0.451	0.328
BIVM	0.312	1.36419	0.515864	0.483	0.515	0.408	0.297
SIK3	0.312	1.36419	0.54841	0.448	0.519	0.408	0.291
ANKRD10	0.311	1.35982	0.562115	0.545	0.564	0.511	0.365
NFIB	0.311	1.35982	0.594375	0.676	0.611	0.727	0.52
RAB21	0.311	1.35982	0.47159	0.641	0.64	0.562	0.426
TECR	0.311	1.35982	0.474742	0.607	0.603	0.525	0.396
NPHP3	0.31	1.35545	0.505811	0.448	0.526	0.42	0.308
PEX19	0.31	1.35545	0.437329	0.628	0.646	0.556	0.43
STAU2	0.31	1.35545	0.474208	0.497	0.571	0.493	0.371
TRIM13	0.31	1.35545	0.459471	0.455	0.546	0.411	0.31
GPR108	0.309	1.35108	0.500591	0.483	0.53	0.437	0.322
PKIG	0.309	1.35108	0.565673	0.538	0.556	0.496	0.353
REV3L	0.309	1.35108	0.501738	0.628	0.626	0.657	0.493
MKKS	0.308	1.3467	0.464148	0.497	0.534	0.425	0.32
WHSC1	0.308	1.3467	0.449934	0.676	0.685	0.674	0.522
MYL6B	0.307	1.34233	0.416277	0.545	0.616	0.5	0.39
SSPN	0.307	1.34233	0.513304	0.524	0.583	0.564	0.417
ARFGEF1	0.306	1.33796	0.407104	0.552	0.603	0.485	0.38
PKN2	0.306	1.33796	0.452074	0.497	0.54	0.413	0.313
PTH1R	0.306	1.33796	0.562951	0.51	0.511	0.436	0.309
RABGAP1L	0.306	1.33796	0.468466	0.69	0.708	0.799	0.618
SCCPDH	0.306	1.33796	0.420193	0.586	0.648	0.516	0.402
EVL	0.305	1.33359	0.479761	0.503	0.55	0.429	0.32
ITGB5	0.305	1.33359	0.466597	0.648	0.652	0.643	0.492
LRBA	0.305	1.33359	0.487282	0.586	0.581	0.525	0.393
LINC00493	0.304	1.32921	0.506046	0.517	0.554	0.424	0.311
PPP5C	0.304	1.32921	0.472576	0.517	0.554	0.458	0.344
R3HDM2	0.304	1.32921	0.541254	0.517	0.515	0.421	0.302
CHMP2A	0.303	1.32484	0.42097	0.648	0.687	0.606	0.475
FGFR2	0.303	1.32484	0.526381	0.586	0.618	0.675	0.5
RAPGEF1	0.303	1.32484	0.489079	0.441	0.546	0.421	0.312
RNF34	0.303	1.32484	0.481057	0.393	0.501	0.393	0.292
AIFM1	0.302	1.32047	0.449568	0.441	0.554	0.406	0.308
CCDC141	0.302	1.32047	0.422839	0.8	0.779	1.007	0.81
FNIP2	0.302	1.32047	0.565602	0.545	0.569	0.552	0.395
LYPLAL1	0.302	1.32047	0.541071	0.503	0.53	0.433	0.311
MAT2A	0.302	1.32047	0.464402	0.51	0.583	0.443	0.334
RANBP9	0.302	1.32047	0.412958	0.497	0.564	0.447	0.348
ZNF704	0.302	1.32047	0.400444	0.697	0.712	0.793	0.637
DTNA	0.301	1.3161	0.417086	0.559	0.589	0.499	0.389
UFC1	0.301	1.3161	0.40688	0.6	0.64	0.55	0.433
PHC3	0.3	1.31172	0.47197	0.524	0.54	0.427	0.32
SNHG8	0.3	1.31172	0.431249	0.414	0.536	0.399	0.306
TRIP11	0.3	1.31172	0.506047	0.531	0.536	0.475	0.35
INSR	0.299	1.30735	0.543796	0.531	0.538	0.528	0.382
SSBP3	0.299	1.30735	0.458624	0.717	0.706	0.724	0.56
HEXIM1	0.298	1.30298	0.521247	0.517	0.497	0.408	0.296
NUDT16L1	0.298	1.30298	0.428184	0.531	0.55	0.431	0.332
RSF1	0.298	1.30298	0.412845	0.621	0.642	0.602	0.474
SOCS6	0.298	1.30298	0.441657	0.407	0.501	0.362	0.275
ZSCAN18	0.298	1.30298	0.410456	0.6	0.613	0.518	0.406
AMZ2	0.297	1.29861	0.404411	0.552	0.601	0.483	0.379
CRYZ	0.297	1.29861	0.549557	0.51	0.542	0.49	0.352
DNAJB14	0.297	1.29861	0.442932	0.469	0.54	0.412	0.314
GOLPH3	0.297	1.29861	0.401187	0.593	0.599	0.487	0.383
KIF3B	0.297	1.29861	0.435469	0.497	0.548	0.419	0.321
DTX3	0.296	1.29423	0.428548	0.538	0.622	0.521	0.404
EHD4	0.296	1.29423	0.507548	0.476	0.503	0.402	0.294
MRPS33	0.296	1.29423	0.415759	0.428	0.511	0.389	0.301
MRPS36	0.296	1.29423	0.410817	0.552	0.597	0.491	0.384
SSH2	0.296	1.29423	0.497022	0.49	0.501	0.385	0.283
SEMA5A	0.295	1.28986	0.416061	0.676	0.671	0.827	0.66
SLIT3	0.295	1.28986	0.439364	0.69	0.708	0.848	0.669
DGKD	0.294	1.28549	0.526793	0.476	0.513	0.424	0.307
FAM78A	0.294	1.28549	0.547403	0.538	0.481	0.5	0.36
GTF3A	0.294	1.28549	0.438151	0.524	0.554	0.426	0.326
N4BP1	0.294	1.28549	0.46115	0.441	0.517	0.396	0.298
MYOM1	0.294	1.28549	0.503924	0.972	0.818	1.68	1.353
SYNGR2	0.293	1.28112	0.42949	0.441	0.501	0.372	0.285
KDSR	0.292	1.27674	0.47357	0.434	0.542	0.439	0.329
PHF21A	0.291	1.27237	0.519647	0.469	0.507	0.389	0.282
PLAGL2	0.291	1.27237	0.422175	0.462	0.503	0.388	0.299
PBX2	0.29	1.268	0.450566	0.469	0.534	0.433	0.329
TBC1D10B	0.29	1.268	0.429949	0.455	0.521	0.405	0.311
TBC1D5	0.29	1.268	0.408383	0.552	0.591	0.51	0.4
NUP133	0.289	1.26363	0.435077	0.476	0.505	0.372	0.284
UBL7	0.288	1.25926	0.469191	0.51	0.552	0.434	0.326
VWA8	0.288	1.25926	0.41446	0.524	0.552	0.471	0.367
AKAP11	0.287	1.25488	0.41352	0.462	0.534	0.411	0.319
FOXJ3	0.282	1.23302	0.410483	0.497	0.534	0.409	0.318
SEMA3A	0.281	1.22865	0.429676	0.717	0.661	0.821	0.65

## Sheet: GO terms seg 5 > seg 3
GO term analysis: seg 5 > seg 3
Analysis Type:	PANTHER Overrepresentation Test (Released 20210224)
Annotation Version and Release Date:	GO Ontology database DOI: 10.5281/zenodo.5228828 Released 2021-08-18
Analyzed List:	upload_1 (Homo sapiens)
Reference List:	Homo sapiens (all genes in database)
Test Type:	FISHER
Correction:	FDR
GO biological process complete	Homo sapiens - REFLIST (20595)	upload_1 (673)	upload_1 (expected)	upload_1 (over/under)	upload_1 (fold Enrichment)	upload_1 (raw P-value)	upload_1 (FDR)
generation of precursor metabolites and energy (GO:0006091)	391	71	12.78	+	5.56	6.94e-29	1.09e-24
aerobic respiration (GO:0009060)	153	47	5	+	9.4	1.12e-27	8.83e-24
energy derivation by oxidation of organic compounds (GO:0015980)	245	56	8.01	+	6.99	3.17e-27	1.66e-23
cellular respiration (GO:0045333)	180	49	5.88	+	8.33	8.1e-27	3.18e-23
ATP metabolic process (GO:0046034)	202	49	6.6	+	7.42	6.4e-25	2.01e-21
oxidative phosphorylation (GO:0006119)	113	35	3.69	+	9.48	5.24e-21	1.37e-17
muscle system process (GO:0003012)	271	46	8.86	+	5.19	5.01e-18	9.84e-15
muscle contraction (GO:0006936)	222	42	7.25	+	5.79	4.73e-18	1.06e-14
respiratory electron transport chain (GO:0022904)	105	30	3.43	+	8.74	2.23e-17	3.89e-14
electron transport chain (GO:0022900)	166	36	5.42	+	6.64	2.82e-17	4.03e-14
aerobic electron transport chain (GO:0019646)	80	27	2.61	+	10.33	2.81e-17	4.41e-14
ATP synthesis coupled electron transport (GO:0042773)	85	27	2.78	+	9.72	9.89e-17	1.2e-13
mitochondrial ATP synthesis coupled electron transport (GO:0042775)	85	27	2.78	+	9.72	9.89e-17	1.3e-13
heart development (GO:0007507)	533	60	17.42	+	3.44	1.79e-15	2.01e-12
cardiac chamber development (GO:0003205)	162	33	5.29	+	6.23	2.93e-15	3.07e-12
mitochondrial respiratory chain complex I assembly (GO:0032981)	58	22	1.9	+	11.61	3.5e-15	3.24e-12
striated muscle tissue development (GO:0014706)	288	43	9.41	+	4.57	3.72e-15	3.25e-12
NADH dehydrogenase complex assembly (GO:0010257)	58	22	1.9	+	11.61	3.5e-15	3.44e-12
striated muscle contraction (GO:0006941)	107	27	3.5	+	7.72	1.19e-14	9.85e-12
cardiac chamber morphogenesis (GO:0003206)	119	28	3.89	+	7.2	1.73e-14	1.36e-11
muscle tissue development (GO:0060537)	303	43	9.9	+	4.34	1.83e-14	1.37e-11
regulation of heart contraction (GO:0008016)	193	34	6.31	+	5.39	4.64e-14	3.31e-11
mitochondrial electron transport, NADH to ubiquinone (GO:0006120)	45	19	1.47	+	12.92	5.74e-14	3.92e-11
cellular metabolic process (GO:0044237)	7029	325	229.69	+	1.41	1.16e-13	7.6e-11
mitochondrial respiratory chain complex assembly (GO:0033108)	93	24	3.04	+	7.9	2.36e-13	1.49e-10
heart process (GO:0003015)	104	25	3.4	+	7.36	2.93e-13	1.77e-10
circulatory system development (GO:0072359)	870	73	28.43	+	2.57	1.51e-12	8.78e-10
cardiac muscle tissue development (GO:0048738)	171	30	5.59	+	5.37	1.6e-12	9e-10
mitochondrion organization (GO:0007005)	409	46	13.37	+	3.44	4.09e-12	2.22e-09
metabolic process (GO:0008152)	7882	348	257.57	+	1.35	4.64e-12	2.43e-09
muscle structure development (GO:0061061)	477	50	15.59	+	3.21	4.96e-12	2.51e-09
heart contraction (GO:0060047)	91	22	2.97	+	7.4	7.12e-12	3.5e-09
heart morphogenesis (GO:0003007)	238	34	7.78	+	4.37	8.92e-12	4.25e-09
negative regulation of cellular process (GO:0048523)	4785	236	156.36	+	1.51	1.19e-11	5.49e-09
cardiac muscle contraction (GO:0060048)	75	20	2.45	+	8.16	1.42e-11	6.38e-09
regulation of blood circulation (GO:1903522)	243	34	7.94	+	4.28	1.49e-11	6.49e-09
regulation of molecular function (GO:0065009)	3060	168	99.99	+	1.68	1.81e-11	7.67e-09
cardiac ventricle development (GO:0003231)	123	24	4.02	+	5.97	4.01e-11	1.66e-08
Unclassified (UNCLASSIFIED)	2897	40	94.67	-	0.42	4.49e-11	1.76e-08
biological_process (GO:0008150)	17698	633	578.33	+	1.09	4.49e-11	1.81e-08
regulation of localization (GO:0032879)	2709	152	88.52	+	1.72	5.68e-11	2.18e-08
positive regulation of cellular process (GO:0048522)	5580	262	182.34	+	1.44	6.46e-11	2.42e-08
positive regulation of biological process (GO:0048518)	6062	278	198.09	+	1.4	1.41e-10	5.14e-08
negative regulation of biological process (GO:0048519)	5187	245	169.5	+	1.45	2.56e-10	9.13e-08
cellular process (GO:0009987)	15074	563	492.59	+	1.14	3.08e-10	1.07e-07
cardiac septum development (GO:0003279)	103	21	3.37	+	6.24	3.3e-10	1.13e-07
muscle cell development (GO:0055001)	151	25	4.93	+	5.07	3.43e-10	1.15e-07
muscle organ development (GO:0007517)	284	34	9.28	+	3.66	6.35e-10	2.08e-07
positive regulation of transport (GO:0051050)	909	68	29.7	+	2.29	9.9e-10	3.18e-07
regulation of cardiac muscle contraction by calcium ion signaling (GO:0010882)	26	12	0.85	+	14.12	1.16e-09	3.66e-07
cellular component assembly (GO:0022607)	2251	128	73.56	+	1.74	1.21e-09	3.71e-07
regulation of system process (GO:0044057)	553	49	18.07	+	2.71	1.66e-09	4.92e-07
cardiac ventricle morphogenesis (GO:0003208)	70	17	2.29	+	7.43	1.64e-09	4.97e-07
muscle cell differentiation (GO:0042692)	252	31	8.23	+	3.76	2.02e-09	5.89e-07
animal organ development (GO:0048513)	3079	160	100.62	+	1.59	4.2e-09	1.2e-06
cardiac conduction (GO:0061337)	66	16	2.16	+	7.42	5.07e-09	1.4e-06
cardiac septum morphogenesis (GO:0060411)	66	16	2.16	+	7.42	5.07e-09	1.42e-06
protein-containing complex subunit organization (GO:0043933)	1337	86	43.69	+	1.97	6.44e-09	1.72e-06
protein-containing complex assembly (GO:0065003)	1185	79	38.72	+	2.04	6.4e-09	1.73e-06
regulation of cellular metabolic process (GO:0031323)	5928	265	193.71	+	1.37	6.7e-09	1.75e-06
regulation of primary metabolic process (GO:0080090)	5707	257	186.49	+	1.38	7.48e-09	1.93e-06
striated muscle cell differentiation (GO:0051146)	193	26	6.31	+	4.12	7.62e-09	1.93e-06
regulation of metabolic process (GO:0019222)	6586	288	215.22	+	1.34	8.37e-09	2.09e-06
regulation of striated muscle contraction (GO:0006942)	92	18	3.01	+	5.99	1.06e-08	2.61e-06
regulation of transport (GO:0051049)	1732	103	56.6	+	1.82	1.09e-08	2.63e-06
regulation of muscle system process (GO:0090257)	231	28	7.55	+	3.71	1.63e-08	3.89e-06
organelle organization (GO:0006996)	3360	168	109.8	+	1.53	1.95e-08	4.58e-06
cellular component organization (GO:0016043)	5298	240	173.13	+	1.39	2.13e-08	4.93e-06
cellular component biogenesis (GO:0044085)	2481	133	81.07	+	1.64	2.24e-08	5.1e-06
cellular component morphogenesis (GO:0032989)	569	47	18.59	+	2.53	2.9e-08	6.5e-06
regulation of ATPase activity (GO:0043462)	46	13	1.5	+	8.65	3.01e-08	6.67e-06
regulation of heart rate (GO:0002027)	100	18	3.27	+	5.51	3.3e-08	7.11e-06
regulation of nitrogen compound metabolic process (GO:0051171)	5537	248	180.94	+	1.37	3.28e-08	7.17e-06
regulation of ion transmembrane transporter activity (GO:0032412)	259	29	8.46	+	3.43	4.41e-08	9.37e-06
myofibril assembly (GO:0030239)	58	14	1.9	+	7.39	4.84e-08	1.01e-05
striated muscle cell development (GO:0055002)	59	14	1.93	+	7.26	5.81e-08	1.2e-05
positive regulation of metabolic process (GO:0009893)	3675	178	120.09	+	1.48	5.96e-08	1.22e-05
regulation of cation transmembrane transport (GO:1904062)	347	34	11.34	+	3	6.2e-08	1.25e-05
system development (GO:0048731)	4169	196	136.23	+	1.44	8.29e-08	1.65e-05
cellular component organization or biogenesis (GO:0071840)	5496	244	179.6	+	1.36	8.53e-08	1.68e-05
multicellular organism development (GO:0007275)	4525	209	147.87	+	1.41	9.04e-08	1.75e-05
actomyosin structure organization (GO:0031032)	108	18	3.53	+	5.1	9.31e-08	1.78e-05
anatomical structure morphogenesis (GO:0009653)	2130	116	69.6	+	1.67	9.73e-08	1.84e-05
regulation of transmembrane transporter activity (GO:0022898)	270	29	8.82	+	3.29	9.97e-08	1.87e-05
regulation of transporter activity (GO:0032409)	287	30	9.38	+	3.2	1.04e-07	1.91e-05
positive regulation of cellular metabolic process (GO:0031325)	3186	158	104.11	+	1.52	1.13e-07	2.07e-05
regulation of cardiac muscle contraction (GO:0055117)	74	15	2.42	+	6.2	1.19e-07	2.15e-05
regulation of metal ion transport (GO:0010959)	394	36	12.88	+	2.8	1.26e-07	2.26e-05
cardiac atrium development (GO:0003230)	36	11	1.18	+	9.35	1.81e-07	3.16e-05
ventricular cardiac muscle tissue development (GO:0003229)	55	13	1.8	+	7.23	1.8e-07	3.17e-05
animal organ morphogenesis (GO:0009887)	957	64	31.27	+	2.05	1.87e-07	3.2e-05
circulatory system process (GO:0003013)	490	41	16.01	+	2.56	1.86e-07	3.21e-05
regulation of release of sequestered calcium ion into cytosol by sarcoplasmic reticulum (GO:0010880)	28	10	0.91	+	10.93	2e-07	3.38e-05
ventricular cardiac muscle tissue morphogenesis (GO:0055010)	46	12	1.5	+	7.98	2.15e-07	3.59e-05
muscle tissue morphogenesis (GO:0060415)	67	14	2.19	+	6.39	2.27e-07	3.76e-05
regulation of cardiac muscle contraction by regulation of the release of sequestered calcium ion (GO:0010881)	21	9	0.69	+	13.12	2.38e-07	3.89e-05
detection of chemical stimulus involved in sensory perception (GO:0050907)	488	0	15.95	-	< 0.01	2.56e-07	4.15e-05
regulation of catalytic activity (GO:0050790)	2393	125	78.2	+	1.6	2.92e-07	4.68e-05
positive regulation of nitrogen compound metabolic process (GO:0051173)	2992	148	97.77	+	1.51	3.34e-07	5.3e-05
tricarboxylic acid cycle (GO:0006099)	30	10	0.98	+	10.2	3.38e-07	5.32e-05
cardiac muscle tissue morphogenesis (GO:0055008)	59	13	1.93	+	6.74	3.62e-07	5.57e-05
cardiac muscle cell development (GO:0055013)	59	13	1.93	+	6.74	3.62e-07	5.63e-05
regulation of muscle contraction (GO:0006937)	162	21	5.29	+	3.97	3.73e-07	5.69e-05
regulation of cell death (GO:0010941)	1593	91	52.06	+	1.75	4.41e-07	6.54e-05
negative regulation of cell death (GO:0060548)	982	64	32.09	+	1.99	4.4e-07	6.58e-05
cardiac muscle cell differentiation (GO:0055007)	83	15	2.71	+	5.53	4.39e-07	6.63e-05
regulation of cellular component movement (GO:0051270)	1025	66	33.49	+	1.97	4.57e-07	6.71e-05
cardiocyte differentiation (GO:0035051)	109	17	3.56	+	4.77	4.87e-07	7.09e-05
pyruvate metabolic process (GO:0006090)	61	13	1.99	+	6.52	5.04e-07	7.13e-05
regulation of biological process (GO:0050789)	11528	442	376.71	+	1.17	4.98e-07	7.18e-05
regulation of macromolecule metabolic process (GO:0060255)	6083	261	198.78	+	1.31	5.03e-07	7.18e-05
regulation of multicellular organismal process (GO:0051239)	2578	131	84.24	+	1.56	5.13e-07	7.2e-05
anatomical structure formation involved in morphogenesis (GO:0048646)	881	59	28.79	+	2.05	5.2e-07	7.23e-05
cellular component assembly involved in morphogenesis (GO:0010927)	97	16	3.17	+	5.05	5.42e-07	7.48e-05
muscle organ morphogenesis (GO:0048644)	74	14	2.42	+	5.79	6.53e-07	8.92e-05
cellular protein-containing complex assembly (GO:0034622)	780	54	25.49	+	2.12	7.85e-07	0.000106
cell communication involved in cardiac conduction (GO:0086065)	43	11	1.41	+	7.83	8.14e-07	0.000107
negative regulation of cellular metabolic process (GO:0031324)	2546	129	83.2	+	1.55	8.13e-07	0.000107
cardiac cell development (GO:0055006)	64	13	2.09	+	6.22	8.11e-07	0.000108
regulation of apoptotic process (GO:0042981)	1426	83	46.6	+	1.78	8.1e-07	0.000109
regulation of programmed cell death (GO:0043067)	1456	84	47.58	+	1.77	1.03e-06	0.000134
detection of chemical stimulus involved in sensory perception of smell (GO:0050911)	443	0	14.48	-	< 0.01	1.3e-06	0.000168
negative regulation of programmed cell death (GO:0043069)	888	58	29.02	+	2	1.48e-06	0.000189
fatty acid beta-oxidation (GO:0006635)	57	12	1.86	+	6.44	1.55e-06	0.000194
positive regulation of macromolecule metabolic process (GO:0010604)	3382	160	110.52	+	1.45	1.55e-06	0.000196
axon guidance (GO:0007411)	227	24	7.42	+	3.24	1.62e-06	0.000202
neuron projection guidance (GO:0097485)	228	24	7.45	+	3.22	1.73e-06	0.000215
negative regulation of apoptotic process (GO:0043066)	870	57	28.43	+	2	1.81e-06	0.000223
carboxylic acid metabolic process (GO:0019752)	808	54	26.4	+	2.05	2.05e-06	0.000248
anatomical structure development (GO:0048856)	5001	219	163.42	+	1.34	2.05e-06	0.00025
organonitrogen compound metabolic process (GO:1901564)	4787	211	156.43	+	1.35	2.28e-06	0.000274
cardiac muscle cell action potential (GO:0086001)	49	11	1.6	+	6.87	2.45e-06	0.00029
ADP metabolic process (GO:0046031)	49	11	1.6	+	6.87	2.45e-06	0.000292
response to organic substance (GO:0010033)	2688	132	87.84	+	1.5	2.64e-06	0.00031
regulation of cellular localization (GO:0060341)	820	54	26.8	+	2.02	2.67e-06	0.000311
glycolytic process (GO:0006096)	40	10	1.31	+	7.65	3.08e-06	0.000354
regulation of calcium ion transmembrane transport (GO:1903169)	156	19	5.1	+	3.73	3.07e-06	0.000354
cell communication by electrical coupling involved in cardiac conduction (GO:0086064)	15	7	0.49	+	14.28	3.47e-06	0.000395
negative regulation of molecular function (GO:0044092)	1132	68	36.99	+	1.84	3.52e-06	0.000398
multicellular organismal signaling (GO:0035637)	114	16	3.73	+	4.29	3.61e-06	0.000406
response to inorganic substance (GO:0010035)	554	41	18.1	+	2.26	3.74e-06	0.000414
ATP generation from ADP (GO:0006757)	41	10	1.34	+	7.46	3.73e-06	0.000415
detection of stimulus involved in sensory perception (GO:0050906)	558	2	18.23	-	0.11	3.92e-06	0.000431
blood circulation (GO:0008015)	399	33	13.04	+	2.53	4e-06	0.000434
atrial septum development (GO:0003283)	23	8	0.75	+	10.64	3.99e-06	0.000436
organic acid metabolic process (GO:0006082)	854	55	27.91	+	1.97	4.13e-06	0.000444
regulation of calcium ion transmembrane transporter activity (GO:1901019)	89	14	2.91	+	4.81	4.51e-06	0.000483
oxoacid metabolic process (GO:0043436)	832	54	27.19	+	1.99	4.68e-06	0.000497
negative regulation of metabolic process (GO:0009892)	2952	141	96.46	+	1.46	4.8e-06	0.000506
regulation of cell communication (GO:0010646)	3242	152	105.94	+	1.43	5.03e-06	0.000527
regulation of cardiac conduction (GO:1903779)	25	8	0.82	+	9.79	6.64e-06	0.000691
developmental process (GO:0032502)	5565	236	181.85	+	1.3	6.9e-06	0.000713
negative regulation of nitrogen compound metabolic process (GO:0051172)	2380	118	77.77	+	1.52	8.01e-06	0.000817
negative regulation of cellular component organization (GO:0051129)	722	48	23.59	+	2.03	8e-06	0.000822
fatty acid oxidation (GO:0019395)	81	13	2.65	+	4.91	8.12e-06	0.000823
regulation of intracellular transport (GO:0032386)	343	29	11.21	+	2.59	8.52e-06	0.000858
sensory perception of chemical stimulus (GO:0007606)	542	2	17.71	-	0.11	8.64e-06	0.000859
tissue development (GO:0009888)	1597	86	52.19	+	1.65	8.63e-06	0.000864
regulation of protein metabolic process (GO:0051246)	2492	122	81.43	+	1.5	9.16e-06	0.000905
regulation of biological quality (GO:0065008)	3705	168	121.07	+	1.39	9.4e-06	0.000917
nervous system development (GO:0007399)	2193	110	71.66	+	1.53	9.37e-06	0.000921
ventricular septum development (GO:0003281)	70	12	2.29	+	5.25	9.99e-06	0.000969
G protein-coupled receptor signaling pathway (GO:0007186)	1216	15	39.74	-	0.38	1.07e-05	0.00103
nucleoside diphosphate phosphorylation (GO:0006165)	59	11	1.93	+	5.71	1.16e-05	0.00111
mitochondrial transport (GO:0006839)	207	21	6.76	+	3.1	1.27e-05	0.00121
lipid oxidation (GO:0034440)	85	13	2.78	+	4.68	1.29e-05	0.00122
regulation of actin filament-based movement (GO:1903115)	38	9	1.24	+	7.25	1.4e-05	0.00132
regulation of signaling (GO:0023051)	3257	150	106.43	+	1.41	1.45e-05	0.00136
regulation of cellular process (GO:0050794)	11076	419	361.94	+	1.16	1.48e-05	0.00137
nucleotide phosphorylation (GO:0046939)	61	11	1.99	+	5.52	1.53e-05	0.00142
cell communication by electrical coupling (GO:0010644)	20	7	0.65	+	10.71	1.57e-05	0.00144
primary metabolic process (GO:0044238)	6869	279	224.46	+	1.24	1.57e-05	0.00144
negative regulation of biosynthetic process (GO:0009890)	1649	87	53.89	+	1.61	1.62e-05	0.00147
cardiac atrium morphogenesis (GO:0003209)	29	8	0.95	+	8.44	1.65e-05	0.00148
regulation of calcium ion transport into cytosol (GO:0010522)	101	14	3.3	+	4.24	1.65e-05	0.00149
calcium-mediated signaling (GO:0019722)	146	17	4.77	+	3.56	1.71e-05	0.00153
regulation of hydrolase activity (GO:0051336)	1033	61	33.76	+	1.81	1.73e-05	0.00154
positive regulation of molecular function (GO:0044093)	1497	81	48.92	+	1.66	1.76e-05	0.00154
purine nucleoside diphosphate metabolic process (GO:0009135)	62	11	2.03	+	5.43	1.76e-05	0.00154
purine ribonucleoside diphosphate metabolic process (GO:0009179)	62	11	2.03	+	5.43	1.76e-05	0.00155
organic substance metabolic process (GO:0071704)	7404	297	241.95	+	1.23	1.81e-05	0.00157
generation of neurons (GO:0048699)	1237	70	40.42	+	1.73	1.86e-05	0.00161
cell differentiation (GO:0030154)	3403	155	111.2	+	1.39	1.99e-05	0.0017
regulation of actin filament-based process (GO:0032970)	398	31	13.01	+	2.38	1.99e-05	0.00171
monocarboxylic acid metabolic process (GO:0032787)	491	36	16.04	+	2.24	2.03e-05	0.00172
positive regulation of nucleobase-containing compound metabolic process (GO:0045935)	1902	97	62.15	+	1.56	2.11e-05	0.00178
neurogenesis (GO:0022008)	1361	75	44.47	+	1.69	2.13e-05	0.00179
response to hormone (GO:0009725)	772	49	25.23	+	1.94	2.36e-05	0.00197
negative regulation of cellular biosynthetic process (GO:0031327)	1616	85	52.81	+	1.61	2.51e-05	0.00209
relaxation of cardiac muscle (GO:0055119)	14	6	0.46	+	13.12	2.6e-05	0.00213
ribonucleoside diphosphate metabolic process (GO:0009185)	65	11	2.12	+	5.18	2.59e-05	0.00213
actin filament-based process (GO:0030029)	599	41	19.57	+	2.09	2.58e-05	0.00214
cell development (GO:0048468)	1623	85	53.04	+	1.6	2.69e-05	0.00219
regulation of release of sequestered calcium ion into cytosol (GO:0051279)	79	12	2.58	+	4.65	2.94e-05	0.00238
tissue morphogenesis (GO:0048729)	542	38	17.71	+	2.15	2.96e-05	0.00239
regulation of transmembrane transport (GO:0034762)	569	39	18.59	+	2.1	3.01e-05	0.0024
regulation of ion transmembrane transport (GO:0034765)	481	35	15.72	+	2.23	3e-05	0.00241
tube morphogenesis (GO:0035239)	644	43	21.04	+	2.04	3.04e-05	0.00242
regulation of cellular component organization (GO:0051128)	2359	114	77.09	+	1.48	3.08e-05	0.00243
biological regulation (GO:0065007)	12249	454	400.27	+	1.13	3.16e-05	0.00248
brain development (GO:0007420)	761	48	24.87	+	1.93	3.29e-05	0.00258
immune response (GO:0006955)	1678	27	54.83	-	0.49	3.5e-05	0.00273
cellular developmental process (GO:0048869)	3463	156	113.16	+	1.38	3.6e-05	0.00279
mesenchyme development (GO:0060485)	224	21	7.32	+	2.87	3.74e-05	0.00288
regulation of cation channel activity (GO:2001257)	173	18	5.65	+	3.18	3.86e-05	0.00296
positive regulation of biosynthetic process (GO:0009891)	1985	99	64.87	+	1.53	4.03e-05	0.00307
outflow tract septum morphogenesis (GO:0003148)	24	7	0.78	+	8.93	4.17e-05	0.00317
regulation of membrane potential (GO:0042391)	434	32	14.18	+	2.26	4.24e-05	0.0032
fatty acid catabolic process (GO:0009062)	83	12	2.71	+	4.42	4.53e-05	0.00341
negative regulation of cellular macromolecule biosynthetic process (GO:2000113)	1547	81	50.55	+	1.6	4.61e-05	0.00345
regulation of cellular protein metabolic process (GO:0032268)	2328	112	76.07	+	1.47	4.67e-05	0.00348
negative regulation of transcription, DNA-templated (GO:0045892)	1322	72	43.2	+	1.67	4.72e-05	0.0035
negative regulation of nucleic acid-templated transcription (GO:1903507)	1324	72	43.27	+	1.66	4.78e-05	0.00351
positive regulation of cellular biosynthetic process (GO:0031328)	1949	97	63.69	+	1.52	4.77e-05	0.00352
negative regulation of RNA biosynthetic process (GO:1902679)	1326	72	43.33	+	1.66	4.85e-05	0.00354
negative regulation of protein modification process (GO:0031400)	500	35	16.34	+	2.14	5.01e-05	0.00365
regulation of cell migration (GO:0030334)	894	53	29.21	+	1.81	5.72e-05	0.00413
regulation of organelle organization (GO:0033043)	1189	66	38.85	+	1.7	5.7e-05	0.00413
head development (GO:0060322)	806	49	26.34	+	1.86	5.82e-05	0.00418
programmed cell death (GO:0012501)	942	55	30.78	+	1.79	5.96e-05	0.00426
positive regulation of transcription, DNA-templated (GO:0045893)	1611	83	52.64	+	1.58	6.34e-05	0.00443
cellular response to hormone stimulus (GO:0032870)	484	34	15.82	+	2.15	6.23e-05	0.00443
catabolic process (GO:0009056)	1882	94	61.5	+	1.53	6.3e-05	0.00444
regulation of the force of heart contraction (GO:0002026)	26	7	0.85	+	8.24	6.42e-05	0.00444
positive regulation of RNA biosynthetic process (GO:1902680)	1613	83	52.71	+	1.57	6.45e-05	0.00445
detection of stimulus (GO:0051606)	694	6	22.68	-	0.26	6.39e-05	0.00445
positive regulation of nucleic acid-templated transcription (GO:1903508)	1611	83	52.64	+	1.58	6.34e-05	0.00445
positive regulation of RNA metabolic process (GO:0051254)	1737	88	56.76	+	1.55	6.28e-05	0.00445
negative regulation of macromolecule biosynthetic process (GO:0010558)	1558	81	50.91	+	1.59	6.55e-05	0.0045
regulation of calcium ion transport (GO:0051924)	252	22	8.23	+	2.67	6.6e-05	0.00451
negative regulation of cellular protein metabolic process (GO:0032269)	962	56	31.44	+	1.78	6.68e-05	0.00455
negative regulation of macromolecule metabolic process (GO:0010605)	2737	127	89.44	+	1.42	7.06e-05	0.00478
detection of chemical stimulus (GO:0009593)	524	3	17.12	-	0.18	7.15e-05	0.00482
positive regulation of establishment of protein localization (GO:1904951)	326	26	10.65	+	2.44	7.22e-05	0.00485
sensory perception of smell (GO:0007608)	468	2	15.29	-	0.13	7.7e-05	0.00515
positive regulation of ATPase activity (GO:0032781)	27	7	0.88	+	7.93	7.86e-05	0.00524
cell morphogenesis involved in neuron differentiation (GO:0048667)	408	30	13.33	+	2.25	7.94e-05	0.00527
adaptive immune response (GO:0002250)	640	5	20.91	-	0.24	7.98e-05	0.00527
positive regulation of transcription by RNA polymerase II (GO:0045944)	1185	65	38.72	+	1.68	8.08e-05	0.00531
sensory perception (GO:0007600)	978	12	31.96	-	0.38	8.25e-05	0.00541
regulation of sodium ion transport (GO:0002028)	89	12	2.91	+	4.13	8.32e-05	0.00543
ventricular septum morphogenesis (GO:0060412)	38	8	1.24	+	6.44	8.69e-05	0.00564
regulation of cell motility (GO:2000145)	950	55	31.04	+	1.77	8.95e-05	0.00579
positive regulation of protein transport (GO:0051222)	310	25	10.13	+	2.47	9.07e-05	0.0058
positive regulation of cation transmembrane transport (GO:1904064)	152	16	4.97	+	3.22	9.03e-05	0.00582
apoptotic process (GO:0006915)	905	53	29.57	+	1.79	9.07e-05	0.00582
central nervous system development (GO:0007417)	1002	57	32.74	+	1.74	9.39e-05	0.00597
multicellular organismal process (GO:0032501)	6584	264	215.15	+	1.23	9.46e-05	0.006
regulation of catabolic process (GO:0009894)	956	55	31.24	+	1.76	9.54e-05	0.00602
actin-mediated cell contraction (GO:0070252)	63	10	2.06	+	4.86	9.69e-05	0.00609
neuron differentiation (GO:0030182)	1008	57	32.94	+	1.73	0.000101	0.00635
commissural neuron axon guidance (GO:0071679)	11	5	0.36	+	13.91	0.000102	0.00637
positive regulation of intracellular transport (GO:0032388)	206	19	6.73	+	2.82	0.000105	0.00655
response to endogenous stimulus (GO:0009719)	1342	71	43.85	+	1.62	0.000106	0.00659
movement of cell or subcellular component (GO:0006928)	1413	74	46.17	+	1.6	0.000111	0.00683
regulation of protein catabolic process (GO:0042176)	398	29	13.01	+	2.23	0.00012	0.00735
actin filament-based movement (GO:0030048)	93	12	3.04	+	3.95	0.000121	0.00743
axon development (GO:0061564)	375	28	12.25	+	2.28	0.000124	0.00754
regulation of developmental growth (GO:0048638)	320	25	10.46	+	2.39	0.000128	0.00776
positive regulation of macromolecule biosynthetic process (GO:0010557)	1847	91	60.36	+	1.51	0.000129	0.00783
neural crest cell migration (GO:0001755)	53	9	1.73	+	5.2	0.000137	0.00823
negative regulation of ATPase activity (GO:0032780)	12	5	0.39	+	12.75	0.000141	0.00845
positive regulation of ion transmembrane transporter activity (GO:0032414)	110	13	3.59	+	3.62	0.000143	0.00857
outflow tract morphogenesis (GO:0003151)	67	10	2.19	+	4.57	0.000153	0.0091
positive regulation of cellular component organization (GO:0051130)	1119	61	36.57	+	1.67	0.000153	0.0091
regulation of muscle adaptation (GO:0043502)	81	11	2.65	+	4.16	0.000154	0.00911
cell death (GO:0008219)	978	55	31.96	+	1.72	0.000166	0.00977
negative regulation of RNA metabolic process (GO:0051253)	1433	74	46.83	+	1.58	0.000168	0.00984
negative regulation of protein metabolic process (GO:0051248)	1028	57	33.59	+	1.7	0.000169	0.00986
supramolecular fiber organization (GO:0097435)	512	34	16.73	+	2.03	0.000173	0.01
regulation of biosynthetic process (GO:0009889)	4152	177	135.68	+	1.3	0.000173	0.0101
response to decreased oxygen levels (GO:0036293)	307	24	10.03	+	2.39	0.000176	0.0102
mesenchymal cell differentiation (GO:0048762)	162	16	5.29	+	3.02	0.000178	0.0102
response to organonitrogen compound (GO:0010243)	984	55	32.15	+	1.71	0.000179	0.0103
positive regulation of developmental process (GO:0051094)	1267	67	41.4	+	1.62	0.000184	0.0105
regulation of cellular biosynthetic process (GO:0031326)	4088	174	133.59	+	1.3	0.000195	0.0111
negative regulation of nucleobase-containing compound metabolic process (GO:0045934)	1538	78	50.26	+	1.55	0.000201	0.0114
relaxation of muscle (GO:0090075)	22	6	0.72	+	8.35	0.000204	0.0115
nucleoside diphosphate metabolic process (GO:0009132)	84	11	2.74	+	4.01	0.000206	0.0116
negative regulation of catalytic activity (GO:0043086)	777	46	25.39	+	1.81	0.000217	0.0122
positive regulation of transmembrane transport (GO:0034764)	219	19	7.16	+	2.65	0.000219	0.0122
regulation of nucleobase-containing compound metabolic process (GO:0019219)	3931	168	128.46	+	1.31	0.000231	0.0129
neuron projection development (GO:0031175)	651	40	21.27	+	1.88	0.000235	0.0131
regulation of phosphorus metabolic process (GO:0051174)	1379	71	45.06	+	1.58	0.000241	0.0133
regulation of phosphate metabolic process (GO:0019220)	1379	71	45.06	+	1.58	0.000241	0.0133
regulation of potassium ion transport (GO:0043266)	101	12	3.3	+	3.64	0.000245	0.0134
vascular endothelial growth factor signaling pathway (GO:0038084)	23	6	0.75	+	7.98	0.00025	0.0137
regulation of locomotion (GO:0040012)	990	55	32.35	+	1.7	0.000255	0.0139
positive regulation of ion transmembrane transport (GO:0034767)	168	16	5.49	+	2.91	0.00026	0.0141
proton transmembrane transport (GO:1902600)	134	14	4.38	+	3.2	0.000262	0.0142
regulation of potassium ion transmembrane transport (GO:1901379)	87	11	2.84	+	3.87	0.000271	0.0146
regulation of cardiac muscle cell membrane potential (GO:0086036)	7	4	0.23	+	17.49	0.000275	0.0148
phosphate-containing compound metabolic process (GO:0006796)	1758	86	57.45	+	1.5	0.000276	0.0148
organic substance biosynthetic process (GO:1901576)	2354	109	76.92	+	1.42	0.00029	0.0155
cell part morphogenesis (GO:0032990)	483	32	15.78	+	2.03	0.000295	0.0157
response to nitrogen compound (GO:1901698)	1071	58	35	+	1.66	0.000306	0.0163
neuron projection morphogenesis (GO:0048812)	455	31	14.87	+	2.08	0.000308	0.0163
response to oxygen-containing compound (GO:1901700)	1567	78	51.21	+	1.52	0.00031	0.0164
carbohydrate catabolic process (GO:0016052)	104	12	3.4	+	3.53	0.000312	0.0164
negative regulation of actin filament polymerization (GO:0030837)	60	9	1.96	+	4.59	0.000314	0.0164
positive regulation of sodium ion transport (GO:0010765)	35	7	1.14	+	6.12	0.000317	0.0165
plasma membrane bounded cell projection morphogenesis (GO:0120039)	459	31	15	+	2.07	0.000325	0.0168
neural crest cell differentiation (GO:0014033)	89	11	2.91	+	3.78	0.000323	0.0168
response to oxygen levels (GO:0070482)	334	25	10.91	+	2.29	0.000325	0.0168
positive regulation of transporter activity (GO:0032411)	121	13	3.95	+	3.29	0.000336	0.0173
monocarboxylic acid catabolic process (GO:0072329)	105	12	3.43	+	3.5	0.000338	0.0174
axonogenesis (GO:0007409)	337	25	11.01	+	2.27	0.000344	0.0176
cell projection morphogenesis (GO:0048858)	463	31	15.13	+	2.05	0.000348	0.0177
embryonic camera-type eye development (GO:0031076)	36	7	1.18	+	5.95	0.000368	0.0185
neural tube development (GO:0021915)	156	15	5.1	+	2.94	0.000365	0.0185
regulation of cardiac muscle cell membrane repolarization (GO:0099623)	25	6	0.82	+	7.34	0.000368	0.0186
appendage development (GO:0048736)	174	16	5.69	+	2.81	0.000373	0.0186
regulation of RNA metabolic process (GO:0051252)	3698	158	120.84	+	1.31	0.000367	0.0186
limb development (GO:0060173)	174	16	5.69	+	2.81	0.000373	0.0186
nitrogen compound metabolic process (GO:0006807)	6360	252	207.83	+	1.21	0.000372	0.0187
purine ribonucleotide metabolic process (GO:0009150)	306	23	10	+	2.3	0.000377	0.0187
stem cell differentiation (GO:0048863)	157	15	5.13	+	2.92	0.000388	0.0192
phosphorus metabolic process (GO:0006793)	1779	86	58.13	+	1.48	0.000391	0.0193
regulation of potassium ion transmembrane transporter activity (GO:1901016)	62	9	2.03	+	4.44	0.00039	0.0193
appendage morphogenesis (GO:0035107)	140	14	4.57	+	3.06	0.000395	0.0193
limb morphogenesis (GO:0035108)	140	14	4.57	+	3.06	0.000395	0.0194
response to chemical (GO:0042221)	4055	171	132.51	+	1.29	0.000397	0.0194
negative regulation of morphogenesis of an epithelium (GO:1905331)	8	4	0.26	+	15.3	0.000402	0.0194
axon extension involved in axon guidance (GO:0048846)	8	4	0.26	+	15.3	0.000402	0.0195
neuron projection extension involved in neuron projection guidance (GO:1902284)	8	4	0.26	+	15.3	0.000402	0.0195
action potential (GO:0001508)	92	11	3.01	+	3.66	0.000418	0.0199
cardiac myofibril assembly (GO:0055003)	16	5	0.52	+	9.56	0.000417	0.0199
embryonic digestive tract morphogenesis (GO:0048557)	16	5	0.52	+	9.56	0.000417	0.02
branching involved in salivary gland morphogenesis (GO:0060445)	16	5	0.52	+	9.56	0.000417	0.0201
skeletal muscle tissue development (GO:0007519)	124	13	4.05	+	3.21	0.000417	0.0201
sarcomere organization (GO:0045214)	37	7	1.21	+	5.79	0.000426	0.0202
embryonic camera-type eye morphogenesis (GO:0048596)	26	6	0.85	+	7.06	0.000441	0.0209
regulation of protein transport (GO:0051223)	516	33	16.86	+	1.96	0.000454	0.0214
response to cold (GO:0009409)	50	8	1.63	+	4.9	0.000457	0.0215
positive regulation of ossification (GO:0045778)	50	8	1.63	+	4.9	0.000457	0.0215
cell morphogenesis involved in differentiation (GO:0000904)	517	33	16.89	+	1.95	0.000463	0.0217
cellular protein metabolic process (GO:0044267)	3219	140	105.19	+	1.33	0.000467	0.0218
cellular catabolic process (GO:0044248)	1615	79	52.77	+	1.5	0.00049	0.0228
regulation of gene expression (GO:0010468)	4749	195	155.19	+	1.26	0.000495	0.0229
gland development (GO:0048732)	414	28	13.53	+	2.07	0.0005	0.0231
forebrain development (GO:0030900)	387	27	12.65	+	2.14	0.000502	0.0232
neural crest cell development (GO:0014032)	79	10	2.58	+	3.87	0.000505	0.0232
regulation of cell communication by electrical coupling (GO:0010649)	17	5	0.56	+	9	0.000526	0.0234
regulation of RNA biosynthetic process (GO:2001141)	3421	147	111.79	+	1.31	0.000528	0.0234
regulation of proteolysis (GO:0030162)	738	43	24.12	+	1.78	0.000511	0.0234
membrane depolarization during cardiac muscle cell action potential (GO:0086012)	17	5	0.56	+	9	0.000526	0.0234
cellular biosynthetic process (GO:0044249)	2293	105	74.93	+	1.4	0.000513	0.0234
ameboidal-type cell migration (GO:0001667)	180	16	5.88	+	2.72	0.000525	0.0235
negative regulation of response to stimulus (GO:0048585)	1559	77	50.94	+	1.51	0.000515	0.0235
cell-cell signaling involved in cardiac conduction (GO:0086019)	27	6	0.88	+	6.8	0.000524	0.0235
regulation of muscle cell apoptotic process (GO:0010660)	65	9	2.12	+	4.24	0.000532	0.0235
negative regulation of transcription by RNA polymerase II (GO:0000122)	932	51	30.46	+	1.67	0.000518	0.0235
positive regulation of potassium ion transmembrane transporter activity (GO:1901018)	27	6	0.88	+	6.8	0.000524	0.0235
regulation of nucleic acid-templated transcription (GO:1903506)	3416	147	111.63	+	1.32	0.000521	0.0236
regulation of transcription, DNA-templated (GO:0006355)	3415	147	111.59	+	1.32	0.00052	0.0236
regulation of ryanodine-sensitive calcium-release channel activity (GO:0060314)	27	6	0.88	+	6.8	0.000524	0.0236
biosynthetic process (GO:0009058)	2420	110	79.08	+	1.39	0.00054	0.0238
positive regulation of intracellular protein transport (GO:0090316)	163	15	5.33	+	2.82	0.000558	0.0245
cardiac ventricle formation (GO:0003211)	9	4	0.29	+	13.6	0.000566	0.0248
regulation of sodium ion transmembrane transport (GO:1902305)	66	9	2.16	+	4.17	0.000588	0.0255
regulation of cardiac neural crest cell migration involved in outflow tract morphogenesis (GO:1905310)	3	3	0.1	+	30.6	0.000587	0.0255
positive regulation of cardiac neural crest cell migration involved in outflow tract morphogenesis (GO:1905312)	3	3	0.1	+	30.6	0.000587	0.0256
negative regulation of cell projection organization (GO:0031345)	182	16	5.95	+	2.69	0.000587	0.0256
regulation of establishment of protein localization (GO:0070201)	541	34	17.68	+	1.92	0.000597	0.0258
striated muscle adaptation (GO:0014888)	28	6	0.91	+	6.56	0.00062	0.0265
embryonic organ development (GO:0048568)	433	29	14.15	+	2.05	0.000617	0.0266
salivary gland morphogenesis (GO:0007435)	28	6	0.91	+	6.56	0.00062	0.0266
mitochondrial transmembrane transport (GO:1990542)	97	11	3.17	+	3.47	0.000628	0.0268
positive regulation of calcium ion transmembrane transporter activity (GO:1901021)	40	7	1.31	+	5.36	0.000644	0.0274
positive regulation of ion transport (GO:0043270)	278	21	9.08	+	2.31	0.000653	0.0277
specification of animal organ identity (GO:0010092)	18	5	0.59	+	8.5	0.000655	0.0277
second-messenger-mediated signaling (GO:0019932)	222	18	7.25	+	2.48	0.000668	0.0282
regulation of protein modification process (GO:0031399)	1483	73	48.46	+	1.51	0.000682	0.0287
protein catabolic process (GO:0030163)	682	40	22.29	+	1.79	0.000696	0.0292
regulation of signal transduction (GO:0009966)	2867	126	93.69	+	1.34	0.000703	0.0295
phosphorylation (GO:0016310)	874	48	28.56	+	1.68	0.000709	0.0296
regulation of ion transport (GO:0043269)	685	40	22.38	+	1.79	0.00072	0.03
response to reactive oxygen species (GO:0000302)	186	16	6.08	+	2.63	0.000729	0.0302
response to steroid hormone (GO:0048545)	281	21	9.18	+	2.29	0.000728	0.0303
gland morphogenesis (GO:0022612)	99	11	3.24	+	3.4	0.000733	0.0303
blood vessel morphogenesis (GO:0048514)	404	27	13.2	+	2.05	0.000736	0.0304
protein metabolic process (GO:0019538)	3807	160	124.4	+	1.29	0.000741	0.0305
organic substance catabolic process (GO:1901575)	1587	77	51.86	+	1.48	0.000755	0.031
regulation of developmental process (GO:0050793)	2368	107	77.38	+	1.38	0.000758	0.031
regulation of intracellular protein transport (GO:0033157)	235	19	7.68	+	2.47	0.000765	0.0312
response to carbohydrate (GO:0009743)	187	16	6.11	+	2.62	0.000769	0.0313
stem cell development (GO:0048864)	84	10	2.74	+	3.64	0.000779	0.0315
response to metal ion (GO:0010038)	380	26	12.42	+	2.09	0.000776	0.0315
mesenchymal cell development (GO:0014031)	84	10	2.74	+	3.64	0.000779	0.0316
regulation of cysteine-type endopeptidase activity (GO:2000116)	237	19	7.74	+	2.45	0.000798	0.0322
tube development (GO:0035295)	845	47	27.61	+	1.7	0.000802	0.0322
cardiac right ventricle morphogenesis (GO:0003215)	19	5	0.62	+	8.05	0.000806	0.0322
pericardium development (GO:0060039)	19	5	0.62	+	8.05	0.000806	0.0323
purine nucleotide metabolic process (GO:0006163)	320	23	10.46	+	2.2	0.000814	0.0325
cardiac muscle cell contraction (GO:0086003)	42	7	1.37	+	5.1	0.000833	0.0331
positive regulation of potassium ion transmembrane transport (GO:1901381)	42	7	1.37	+	5.1	0.000833	0.0331
membrane depolarization during action potential (GO:0086010)	30	6	0.98	+	6.12	0.000851	0.0334
skeletal muscle contraction (GO:0003009)	30	6	0.98	+	6.12	0.000851	0.0335
salivary gland development (GO:0007431)	30	6	0.98	+	6.12	0.000851	0.0336
regulation of protein localization (GO:0032880)	853	47	27.87	+	1.69	0.000849	0.0336
skeletal muscle organ development (GO:0060538)	135	13	4.41	+	2.95	0.000869	0.034
regulation of transcription by RNA polymerase II (GO:0006357)	2538	113	82.94	+	1.36	0.000875	0.0342
ribonucleotide metabolic process (GO:0009259)	324	23	10.59	+	2.17	0.000901	0.0351
neuron development (GO:0048666)	810	45	26.47	+	1.7	0.000906	0.0352
pattern specification process (GO:0007389)	425	28	13.89	+	2.02	0.000911	0.0354
regulation of sequestering of calcium ion (GO:0051282)	119	12	3.89	+	3.09	0.000939	0.0364
actin cytoskeleton organization (GO:0030036)	539	33	17.61	+	1.87	0.000944	0.0364
muscle cell cellular homeostasis (GO:0046716)	20	5	0.65	+	7.65	0.000981	0.0377
negative regulation of protein-containing complex assembly (GO:0031333)	137	13	4.48	+	2.9	0.000984	0.0377
regulation of mesenchymal cell proliferation (GO:0010464)	31	6	1.01	+	5.92	0.000988	0.0378
mitochondrial electron transport, cytochrome c to oxygen (GO:0006123)	20	5	0.65	+	7.65	0.000981	0.0378
regulation of cellular macromolecule biosynthetic process (GO:2000112)	3906	163	127.64	+	1.28	0.000991	0.0378
negative regulation of prostatic bud formation (GO:0060686)	4	3	0.13	+	22.95	0.001	0.0378
regulation of muscle filament sliding (GO:0032971)	4	3	0.13	+	22.95	0.001	0.0379
positive regulation of epithelial cell proliferation (GO:0050679)	192	16	6.27	+	2.55	0.000997	0.0379
regulation of sodium ion export across plasma membrane (GO:1903276)	4	3	0.13	+	22.95	0.001	0.038
positive regulation of sodium ion export across plasma membrane (GO:1903278)	4	3	0.13	+	22.95	0.001	0.0381
secondary heart field specification (GO:0003139)	11	4	0.36	+	11.13	0.00103	0.0384
cellular macromolecule metabolic process (GO:0044260)	4442	182	145.15	+	1.25	0.00103	0.0385
positive regulation of hydrolase activity (GO:0051345)	588	35	19.21	+	1.82	0.00104	0.0385
cardiac chamber formation (GO:0003207)	11	4	0.36	+	11.13	0.00103	0.0385
lipid modification (GO:0030258)	174	15	5.69	+	2.64	0.00103	0.0385
ventricular cardiac muscle cell development (GO:0055015)	11	4	0.36	+	11.13	0.00103	0.0386
endocardial cushion development (GO:0003197)	44	7	1.44	+	4.87	0.00106	0.0393
digestive tract morphogenesis (GO:0048546)	44	7	1.44	+	4.87	0.00106	0.0394
response to hydrogen peroxide (GO:0042542)	121	12	3.95	+	3.03	0.00107	0.0396
epithelial tube morphogenesis (GO:0060562)	305	22	9.97	+	2.21	0.00108	0.0398
response to monosaccharide (GO:0034284)	157	14	5.13	+	2.73	0.00111	0.0409
vascular endothelial growth factor receptor signaling pathway (GO:0048010)	32	6	1.05	+	5.74	0.00114	0.0418
regulation of smooth muscle cell differentiation (GO:0051150)	32	6	1.05	+	5.74	0.00114	0.0419
positive regulation of proteolysis (GO:0045862)	371	25	12.12	+	2.06	0.00116	0.0421
negative regulation of signal transduction (GO:0009968)	1204	61	39.34	+	1.55	0.00116	0.0422
response to organic cyclic compound (GO:0014070)	896	48	29.28	+	1.64	0.00117	0.0423
regulation of hydrogen peroxide metabolic process (GO:0010310)	21	5	0.69	+	7.29	0.00118	0.0426
sympathetic nervous system development (GO:0048485)	21	5	0.69	+	7.29	0.00118	0.0427
positive regulation of sodium ion transmembrane transport (GO:1902307)	21	5	0.69	+	7.29	0.00118	0.0428
positive regulation of cell migration (GO:0030335)	522	32	17.06	+	1.88	0.00119	0.0428
regulation of ventricular cardiac muscle cell membrane repolarization (GO:0060307)	21	5	0.69	+	7.29	0.00118	0.0429
protein stabilization (GO:0050821)	196	16	6.4	+	2.5	0.00122	0.0436
regulation of macromolecule biosynthetic process (GO:0010556)	3935	163	128.59	+	1.27	0.00123	0.044
ribose phosphate metabolic process (GO:0019693)	335	23	10.95	+	2.1	0.00124	0.044
negative regulation of cell population proliferation (GO:0008285)	704	40	23.01	+	1.74	0.00124	0.0441
embryonic morphogenesis (GO:0048598)	568	34	18.56	+	1.83	0.00125	0.0442
regulation of growth (GO:0040008)	659	38	21.53	+	1.76	0.00126	0.0446
protein tetramerization (GO:0051262)	90	10	2.94	+	3.4	0.00126	0.0446
positive regulation of endopeptidase activity (GO:0010950)	178	15	5.82	+	2.58	0.00128	0.045
sensory system development (GO:0048880)	376	25	12.29	+	2.03	0.0013	0.0456
positive regulation of vasculature development (GO:1904018)	160	14	5.23	+	2.68	0.00132	0.0457
telencephalon development (GO:0021537)	254	19	8.3	+	2.29	0.00132	0.0457
regulation of epithelial cell migration (GO:0010632)	230	18	7.52	+	2.39	0.0013	0.0457
positive regulation of angiogenesis (GO:0045766)	160	14	5.23	+	2.68	0.00132	0.0458
regulation of cardiac muscle cell contraction (GO:0086004)	33	6	1.08	+	5.56	0.00131	0.0458
muscle adaptation (GO:0043500)	33	6	1.08	+	5.56	0.00131	0.0459
regulation of membrane repolarization (GO:0060306)	33	6	1.08	+	5.56	0.00131	0.046
negative regulation of protein polymerization (GO:0032272)	75	9	2.45	+	3.67	0.00134	0.0461
heart field specification (GO:0003128)	12	4	0.39	+	10.2	0.00133	0.0461
negative chemotaxis (GO:0050919)	46	7	1.5	+	4.66	0.00134	0.0462
cellular response to growth factor stimulus (GO:0071363)	455	29	14.87	+	1.95	0.00136	0.0466
embryo development (GO:0009790)	991	52	32.38	+	1.61	0.00139	0.0475
regulation of establishment of cell polarity (GO:2000114)	22	5	0.72	+	6.95	0.00142	0.0484
response to lipid (GO:0033993)	829	45	27.09	+	1.66	0.00146	0.0498

## Sheet: seg 4 > seg 3
	AUCPR	AUCPR.ratio	exp.fc	posFrac_1	posFrac_2	nTrans_1	nTrans_2
MB	0.905	3.22199	4.62643	0.911	0.19	1.89	0.15
HSPB7	0.861	3.06534	1.89034	1	0.818	2.4	1.107
CKM	0.852	3.0333	3.00867	0.974	0.405	2.188	0.528
NKX2-5	0.833	2.96565	3.32505	0.88	0.221	1.162	0.168
LRRC10	0.807	2.87309	3.82859	0.759	0.131	0.937	0.09
NREP	0.805	2.86597	1.10918	0.995	0.984	2.99	2.077
TCEA3	0.78	2.77696	3.31373	0.78	0.164	0.814	0.106
FHL2	0.771	2.74492	2.60301	0.859	0.452	1.354	0.329
PDE4DIP	0.767	2.73068	2.3004	0.853	0.474	1.071	0.291
CORIN	0.765	2.72356	3.67385	0.702	0.117	0.88	0.092
MYH7B	0.763	2.71644	3.57651	0.702	0.115	0.624	0.064
TNNI1	0.761	2.70932	0.937133	1	0.998	3.265	2.459
MYBPC3	0.759	2.7022	1.66104	0.953	0.667	1.945	0.927
MYL3	0.753	2.68084	2.37076	0.958	0.534	2.381	0.859
FITM1	0.744	2.6488	2.61441	0.864	0.313	1.024	0.225
KLHL41	0.731	2.60251	2.58475	0.848	0.292	1.134	0.262
PPP1R1A	0.728	2.59183	1.81064	0.932	0.632	1.524	0.618
MYH6	0.728	2.59183	1.33552	0.979	0.867	3.157	2.049
CPNE5	0.726	2.58471	3.77253	0.602	0.094	0.577	0.051
FAM189A2	0.723	2.57403	2.73382	0.791	0.28	0.996	0.201
MAN1C1	0.72	2.56335	3.68109	0.571	0.088	0.492	0.045
ENO3	0.697	2.48147	1.60885	0.874	0.636	1.237	0.531
SPHKAP	0.696	2.47791	2.38274	0.801	0.329	1.144	0.301
APOBEC2	0.688	2.44942	2.55647	0.785	0.207	0.837	0.181
LDHA	0.68	2.42094	1.56511	0.932	0.816	2.046	1.041
RSPO3	0.679	2.41738	3.65348	0.524	0.098	0.856	0.09
CRIP2	0.678	2.41382	0.94855	0.974	0.91	1.739	1.145
LDB3	0.673	2.39602	1.58152	0.984	0.722	2.168	1.116
HSPB2	0.672	2.39246	2.49669	0.691	0.247	0.748	0.164
ADM	0.671	2.3889	3.2438	0.539	0.147	0.636	0.082
RYR2	0.669	2.38178	1.33011	0.958	0.8	1.796	0.988
CLIC5	0.664	2.36398	2.74053	0.592	0.172	0.536	0.094
TMOD1	0.662	2.35686	1.66728	0.801	0.493	0.85	0.325
CYFIP2	0.656	2.3355	1.99548	0.764	0.423	0.875	0.274
EEF1A2	0.656	2.3355	1.63902	0.874	0.54	1.245	0.526
RRAD	0.655	2.33194	2.36248	0.827	0.254	1.098	0.289
LAMA2	0.65	2.31414	1.77148	0.775	0.464	0.972	0.358
ALDOA	0.648	2.30702	0.775657	0.995	0.975	2.093	1.54
WNK2	0.645	2.29634	2.6684	0.623	0.147	0.514	0.094
PGM5	0.644	2.29277	2.49014	0.623	0.198	0.527	0.109
HADHB	0.64	2.27853	1.01217	0.916	0.836	1.258	0.757
ATP1A2	0.639	2.27497	2.78645	0.602	0.147	0.6	0.104
GPI	0.628	2.23581	0.894545	0.969	0.9	1.557	1.032
LRRC75A-AS1	0.625	2.22513	2.669	0.55	0.104	1.052	0.225
NPPA	0.624	2.22157	2.9895	0.675	0.333	2.093	0.497
HSPB3	0.623	2.21801	2.06679	0.775	0.284	0.867	0.259
MLIP	0.623	2.21801	2.09993	0.707	0.294	0.672	0.187
ADAM11	0.622	2.21445	2.4571	0.565	0.188	0.428	0.088
HIPK3	0.622	2.21445	1.76059	0.738	0.493	1.039	0.391
PPP1R3C	0.622	2.21445	1.92497	0.785	0.387	0.894	0.294
TNNT2	0.622	2.21445	0.677909	1	0.998	3.774	3.158
AGL	0.62	2.20733	1.48494	0.801	0.566	0.908	0.393
RACK1	0.616	2.19309	2.51838	0.555	0.106	1.876	0.552
TSPAN9	0.615	2.18953	2.17956	0.618	0.262	0.527	0.134
MTUS2	0.614	2.18597	1.7196	0.754	0.45	0.812	0.298
RCAN2	0.612	2.17885	1.45877	0.859	0.562	0.98	0.437
ICA1	0.611	2.17529	2.04982	0.618	0.276	0.469	0.128
ERBB4	0.61	2.17173	1.58664	0.822	0.519	0.936	0.383
RBM38	0.61	2.17173	1.58945	0.853	0.54	1.089	0.459
TRDN	0.608	2.16461	1.19271	0.948	0.738	1.598	0.916
CITED4	0.599	2.13257	1.69161	0.77	0.446	0.843	0.317
ZFAS1	0.597	2.12545	2.59306	0.503	0.094	0.654	0.131
FXYD6	0.595	2.11832	1.24914	0.864	0.699	1.13	0.585
PPP1R14C	0.594	2.11476	1.63444	0.812	0.419	0.842	0.328
TESC	0.591	2.10408	2.4453	0.55	0.139	0.412	0.085
BVES	0.588	2.0934	1.11938	0.859	0.724	1.178	0.661
PLCXD3	0.586	2.08628	2.51293	0.524	0.125	0.447	0.089
ADPRHL1	0.585	2.08272	1.54772	0.911	0.507	1.344	0.61
MTUS1	0.585	2.08272	1.87632	0.702	0.346	0.817	0.272
PLN	0.585	2.08272	1.00864	0.99	0.926	2.17	1.454
SRL	0.583	2.0756	2.28998	0.586	0.184	0.525	0.124
LMO4	0.582	2.07204	1.18512	0.901	0.775	1.313	0.725
RBPMS2	0.582	2.07204	0.882803	0.958	0.863	1.398	0.916
PROX1	0.577	2.05424	1.8778	0.696	0.297	0.596	0.188
PRKAR2A	0.574	2.04356	2.42915	0.513	0.162	0.553	0.12
RPS17	0.573	2.04	2.35471	0.56	0.106	1.18	0.319
NFIC	0.572	2.03644	1.46269	0.817	0.542	0.942	0.416
CIRBP	0.57	2.02932	0.767396	0.958	0.93	1.617	1.147
TIMP3	0.57	2.02932	1.45736	0.859	0.556	1.141	0.525
SHD	0.569	2.02576	1.77201	0.712	0.337	0.751	0.263
CACNA1C	0.568	2.0222	1.60799	0.733	0.403	0.673	0.257
TNK2	0.567	2.01864	2.00353	0.571	0.262	0.488	0.138
DMD	0.566	2.01508	1.31595	0.832	0.591	0.977	0.474
CRIP1	0.564	2.00796	1.56044	0.712	0.434	0.713	0.283
FIGN	0.563	2.0044	1.86693	0.602	0.346	0.617	0.197
GNG11	0.563	2.0044	2.2448	0.503	0.229	0.43	0.102
HNRNPDL	0.562	2.00084	2.32614	0.529	0.1	0.999	0.262
SOD2	0.561	1.99728	1.13414	0.817	0.644	0.819	0.431
FHOD3	0.558	1.9866	1.146	0.827	0.634	0.95	0.507
MDH2	0.555	1.97592	0.776982	0.921	0.859	1.248	0.85
TNNC1	0.555	1.97592	1.08322	1	0.902	2.453	1.638
ADAMTS19	0.553	1.9688	1.75078	0.618	0.333	0.611	0.21
TACC2	0.552	1.96524	1.31299	0.743	0.519	0.676	0.311
BMP7	0.551	1.96168	1.765	0.702	0.294	0.709	0.247
TBX2	0.547	1.94743	1.62915	0.639	0.364	0.674	0.254
CAPN3	0.546	1.94387	2.179	0.529	0.204	0.544	0.139
NEXN	0.546	1.94387	0.738983	0.927	0.885	1.666	1.203
POPDC3	0.545	1.94031	1.06375	0.864	0.703	1.02	0.577
ASPH	0.544	1.93675	1.05805	0.89	0.722	1.072	0.613
TRIM54	0.544	1.93675	1.85125	0.586	0.254	0.443	0.137
BEX3	0.543	1.93319	2.15761	0.565	0.106	1.343	0.427
OBSCN	0.536	1.90827	1.36334	0.675	0.431	0.537	0.233
TPI1	0.535	1.90471	0.584124	1	0.98	2.117	1.69
MTRNR2L1	0.534	1.90115	0.901249	0.932	0.857	1.301	0.835
ITGB1BP2	0.533	1.89759	1.34992	0.764	0.483	0.725	0.329
BNIP3	0.532	1.89403	1.11759	0.853	0.748	1.177	0.661
ERCC-00009	0.531	1.89047	0.864889	0.984	0.951	1.716	1.173
MDH1	0.531	1.89047	0.791641	1	0.941	2.083	1.521
RASSF5	0.529	1.88335	1.47188	0.696	0.403	0.677	0.282
ERCC-00108	0.528	1.87979	0.862134	0.969	0.926	1.56	1.051
AKAP6	0.528	1.87979	1.79713	0.545	0.276	0.496	0.161
LOC100506548	0.527	1.87623	0.987138	0.78	0.681	0.854	0.493
TSC22D1	0.523	1.86199	0.719467	0.937	0.941	1.745	1.28
FAM134B	0.521	1.85487	1.89762	0.529	0.202	0.404	0.12
PRSS35	0.521	1.85487	1.22044	0.712	0.54	0.794	0.395
NEBL	0.519	1.84775	0.604925	1	0.971	2.831	2.328
KCNH2	0.518	1.84419	1.38615	0.696	0.429	0.621	0.27
SORD	0.517	1.84063	1.44299	0.639	0.466	0.687	0.292
A2M	0.516	1.83707	1.86409	0.586	0.235	0.995	0.348
NORAD	0.515	1.83351	1.91708	0.524	0.1	0.643	0.2
FAM162A	0.514	1.82995	1.05718	0.832	0.679	0.922	0.516
GOLGA8A	0.514	1.82995	1.51384	0.597	0.382	0.581	0.231
KLHL24	0.514	1.82995	1.21292	0.796	0.528	0.782	0.39
C4orf3	0.511	1.81927	0.724177	0.895	0.83	1.104	0.762
ERCC-00003	0.511	1.81927	0.846561	0.979	0.941	1.551	1.052
ARL6IP5	0.51	1.81571	0.558094	0.958	0.939	1.484	1.151
EIF1B	0.509	1.81215	0.696223	0.911	0.871	1.355	0.972
TMEM56	0.508	1.80859	1.51093	0.545	0.35	0.468	0.182
BMP2	0.507	1.80503	0.913346	0.885	0.834	2.003	1.377
FAM78A	0.505	1.79791	1.28357	0.749	0.481	0.757	0.36
GOLIM4	0.505	1.79791	1.41536	0.738	0.458	0.822	0.365
PRDX2	0.505	1.79791	0.598927	0.974	0.937	1.561	1.194
SLC25A4	0.504	1.79435	0.831184	0.995	0.896	1.967	1.398
PPP1R13B	0.503	1.79079	1.67567	0.513	0.233	0.361	0.123
SEMA6D	0.502	1.78723	1.63343	0.55	0.29	0.586	0.216
SLC25A37	0.502	1.78723	1.36122	0.66	0.401	0.528	0.229
ERCC-00136	0.501	1.78366	0.909362	0.942	0.826	1.163	0.731
HIF3A	0.5	1.7801	1.28122	0.738	0.476	0.668	0.313
SLC30A3	0.499	1.77654	1.27852	0.759	0.472	0.742	0.353
SGCA	0.499	1.77654	1.31836	0.607	0.395	0.515	0.229
NCAM1	0.498	1.77298	1.21588	0.88	0.624	1.38	0.757
USP2	0.498	1.77298	1.47755	0.592	0.303	0.445	0.176
GAS6	0.497	1.76942	1.37243	0.602	0.358	0.487	0.208
MYH7	0.497	1.76942	1.69944	0.649	0.47	1.831	0.838
ISOC1	0.496	1.76586	1.18468	0.681	0.538	0.705	0.353
DMKN	0.495	1.7623	1.45479	0.565	0.313	0.464	0.187
SNHG16	0.495	1.7623	0.5315	0.963	0.949	1.511	1.189
PROS1	0.493	1.75518	1.1255	0.681	0.53	0.614	0.314
ALPK2	0.492	1.75162	0.855937	0.916	0.793	1.431	0.954		https://www.ncbi.nlm.nih.gov/pmc/articles/PMC5993047/						https://journals.physiology.org/doi/full/10.1152/ajpheart.00249.2020
NDUFA5	0.491	1.74806	0.778449	0.906	0.787	1.037	0.69
SLC8A1	0.491	1.74806	0.709047	0.99	0.965	2.078	1.571
WNK1	0.491	1.74806	0.616402	0.885	0.875	1.214	0.896
MT-TT	0.49	1.7445	1.5091	0.518	0.28	0.365	0.139
TAB2	0.49	1.7445	0.75751	0.812	0.765	0.866	0.572
CCNB1IP1	0.489	1.74094	0.658175	0.927	0.832	1.092	0.78
HADHA	0.488	1.73738	0.618839	0.89	0.853	1.166	0.856
NFYB	0.487	1.73382	1.1045	0.712	0.521	0.605	0.313
CCDC69	0.486	1.73026	1.25116	0.67	0.407	0.552	0.258
CLGN	0.486	1.73026	1.55072	0.565	0.258	0.409	0.153
DKK3	0.486	1.73026	0.749438	0.901	0.8	1.132	0.773
FABP3	0.486	1.73026	0.887753	0.822	0.693	0.919	0.567
FER	0.486	1.73026	1.63671	0.518	0.235	0.423	0.15
COX20	0.484	1.72314	1.68848	0.518	0.207	0.46	0.159
MLLT6	0.483	1.71958	0.965911	0.686	0.53	0.582	0.327
TMEM173	0.482	1.71602	1.54583	0.524	0.27	0.42	0.158
CADPS	0.481	1.71246	1.33471	0.728	0.368	0.69	0.314
KAT6B	0.481	1.71246	1.29327	0.56	0.393	0.475	0.213
RABGAP1L	0.481	1.71246	0.948713	0.848	0.708	1.023	0.618
ARHGAP26	0.48	1.7089	1.29613	0.55	0.36	0.447	0.199
ETFB	0.48	1.7089	0.969899	0.77	0.607	0.747	0.429
YPEL3	0.48	1.7089	1.20124	0.702	0.436	0.574	0.278
GBAS	0.477	1.69822	0.606547	0.906	0.855	1.096	0.805
COX7C	0.476	1.69466	0.424645	1	0.998	2.2	1.879
PPM1K	0.476	1.69466	0.944101	0.806	0.65	0.931	0.557
PRKAA2	0.475	1.6911	1.00736	0.749	0.573	0.706	0.394
UQCRC2	0.475	1.6911	0.521462	0.948	0.881	1.244	0.966
GPC1	0.473	1.68398	1.00013	0.702	0.575	0.661	0.368
TMEM245	0.472	1.68042	0.617307	0.932	0.881	1.277	0.947
NDRG2	0.471	1.67686	0.991177	0.764	0.558	0.711	0.401
ATP5D	0.47	1.6733	0.767509	0.848	0.751	0.916	0.605
ERCC-00022	0.469	1.66974	1.09905	0.77	0.595	0.727	0.385
STAT3	0.469	1.66974	1.02221	0.702	0.558	0.611	0.333
MYL4	0.468	1.66618	0.605013	1	0.953	2.717	2.222
PITPNB	0.467	1.66262	0.739971	0.827	0.748	0.854	0.569
ABCC5	0.466	1.65906	1.16513	0.607	0.429	0.514	0.252
LPCAT4	0.466	1.65906	1.03726	0.644	0.513	0.601	0.324
LRRC16A	0.466	1.65906	1.44683	0.503	0.272	0.391	0.156
FXYD1	0.465	1.6555	1.31275	0.565	0.333	0.441	0.194
MITF	0.465	1.6555	1.01354	0.832	0.609	0.969	0.56
PDK2	0.465	1.6555	1.06394	0.686	0.515	0.605	0.321
SDHA	0.465	1.6555	1.1546	0.586	0.393	0.401	0.194
SLC25A12	0.464	1.65194	0.995958	0.796	0.566	0.756	0.428
MOAP1	0.463	1.64838	1.12977	0.67	0.425	0.509	0.255
SMARCD3	0.463	1.64838	0.796319	0.77	0.697	0.789	0.505
SYNGR2	0.463	1.64838	1.00368	0.675	0.501	0.524	0.285
BTG1	0.462	1.64482	0.680152	0.927	0.843	1.313	0.946
ERCC-00042	0.462	1.64482	0.609676	0.99	0.961	1.574	1.199
MXI1	0.462	1.64482	1.19858	0.592	0.407	0.482	0.23
TNNI3	0.462	1.64482	1.23165	0.707	0.411	1.032	0.531
CAT	0.461	1.64126	1.35623	0.503	0.301	0.37	0.156
COL18A1	0.461	1.64126	0.51894	0.963	0.937	1.654	1.321
NACA	0.461	1.64126	0.464824	0.901	0.92	1.152	0.915
QPRT	0.461	1.64126	0.822779	0.759	0.708	0.876	0.558
ERCC-00043	0.46	1.6377	0.827285	0.885	0.765	0.964	0.619
ESRRG	0.459	1.63414	1.24316	0.597	0.366	0.532	0.249
AFAP1L1	0.458	1.63058	1.18336	0.581	0.395	0.445	0.213
MTHFR	0.457	1.62702	1.12943	0.545	0.395	0.429	0.212
ARHGAP31	0.456	1.62346	1.18712	0.597	0.382	0.473	0.227
KCNIP2	0.456	1.62346	1.45591	0.571	0.301	0.798	0.344
NDUFS6	0.456	1.62346	0.52496	0.885	0.877	1.058	0.809
PGK1	0.456	1.62346	0.404692	0.937	0.93	1.421	1.181
PRNP	0.455	1.6199	0.975939	0.623	0.526	0.534	0.296
CAV1	0.454	1.61634	1.29912	0.644	0.356	0.826	0.394
TGM2	0.454	1.61634	1.07048	0.644	0.501	0.667	0.356
COX5B	0.453	1.61277	0.589049	0.969	0.928	1.491	1.14
EFNB3	0.453	1.61277	1.09924	0.702	0.507	0.722	0.382
SPAG7	0.453	1.61277	0.590368	0.859	0.775	0.87	0.632
TMED4	0.453	1.61277	1.36237	0.534	0.317	0.482	0.207
ALDOC	0.452	1.60921	1.33249	0.503	0.301	0.395	0.17
ID2	0.452	1.60921	0.807325	0.927	0.816	1.603	1.114
MMP15	0.452	1.60921	0.882807	0.754	0.613	0.72	0.434
MT-TK	0.451	1.60565	0.780444	0.749	0.679	0.788	0.509
RASSF8	0.451	1.60565	0.999867	0.639	0.474	0.533	0.291
ATPIF1	0.45	1.60209	0.640177	0.911	0.838	1.085	0.782
AK1	0.449	1.59853	0.842645	0.759	0.609	0.652	0.399
FAM92A1	0.449	1.59853	1.26469	0.518	0.339	0.408	0.184
PNRC1	0.449	1.59853	0.722134	0.906	0.808	1.178	0.82
SPEG	0.449	1.59853	0.720689	0.832	0.755	1.009	0.691
ERCC-00111	0.448	1.59497	0.657474	0.932	0.924	1.276	0.927
SLIT3	0.446	1.58785	0.820674	0.817	0.708	1.03	0.669
ZFP36L2	0.446	1.58785	1.13828	0.644	0.436	0.588	0.297
IGFBP5	0.445	1.58429	1.14921	0.78	0.554	1.385	0.788
NAV1	0.445	1.58429	1.19229	0.733	0.466	1.155	0.62
PTP4A3	0.445	1.58429	1.00868	0.691	0.515	0.593	0.325
COX5A	0.444	1.58073	0.437503	0.948	0.959	1.698	1.41
MAGEF1	0.444	1.58073	0.788864	0.759	0.644	0.678	0.43
NEAT1	0.444	1.58073	1.13761	0.654	0.495	0.967	0.52
RNF207	0.444	1.58073	1.15838	0.623	0.393	0.525	0.259
ADD3	0.443	1.57717	0.662736	0.874	0.834	1.253	0.906
C6orf136	0.443	1.57717	1.22496	0.555	0.342	0.372	0.171
CACNB2	0.443	1.57717	0.835944	0.754	0.577	0.675	0.416
ERCC-00145	0.443	1.57717	0.746091	0.906	0.845	1.067	0.725
PPP1R3B	0.443	1.57717	1.15829	0.592	0.38	0.465	0.227
QKI	0.443	1.57717	0.425073	0.995	0.992	2.032	1.723
SIPA1L1	0.443	1.57717	1.06017	0.571	0.411	0.478	0.249
EPM2AIP1	0.442	1.57361	0.520049	0.932	0.881	1.154	0.891
FRMD3	0.442	1.57361	1.28695	0.513	0.258	0.401	0.178
LGALS3BP	0.442	1.57361	1.25724	0.508	0.178	0.479	0.22
PHTF2	0.442	1.57361	0.896814	0.649	0.515	0.518	0.301
PLCB4	0.442	1.57361	1.14957	0.618	0.38	0.487	0.24
PSD3	0.442	1.57361	0.854645	0.796	0.638	0.856	0.534
THAP4	0.442	1.57361	1.09532	0.597	0.395	0.424	0.214
C14orf159	0.441	1.57005	1.08709	0.628	0.409	0.509	0.262
MBNL1	0.441	1.57005	1.13215	0.565	0.37	0.407	0.2
OBSL1	0.441	1.57005	0.588985	0.859	0.814	0.982	0.721
MADD	0.44	1.56649	1.16714	0.518	0.321	0.363	0.173
ZBTB44	0.439	1.56293	0.960733	0.665	0.472	0.526	0.294
EPB41L4A-AS1	0.438	1.55937	1.04642	0.613	0.454	0.49	0.258
PGM1	0.438	1.55937	0.603156	0.895	0.804	1.083	0.796
PTPN21	0.437	1.55581	0.782824	0.691	0.603	0.632	0.4
SOBP	0.437	1.55581	1.1423	0.503	0.354	0.438	0.215
TMEM41A	0.437	1.55581	0.890076	0.571	0.505	0.471	0.273
HIGD2A	0.436	1.55225	0.609638	0.885	0.773	0.831	0.595
KLHDC3	0.436	1.55225	0.44839	0.984	0.957	1.394	1.133
RNPC3	0.436	1.55225	1.01319	0.623	0.479	0.571	0.311
PTGES3L	0.435	1.54869	0.933088	0.665	0.489	0.493	0.279
SNTA1	0.435	1.54869	0.686086	0.859	0.763	0.976	0.679
CRYAB	0.434	1.54513	0.764905	0.974	0.832	1.843	1.335
CS	0.434	1.54513	0.412014	0.953	0.941	1.543	1.286
NFYC	0.434	1.54513	0.740694	0.702	0.65	0.643	0.418
MYO18B	0.434	1.54513	0.733544	0.759	0.644	0.721	0.475
ATP11A	0.433	1.54157	1.10373	0.503	0.376	0.428	0.215
CISD1	0.433	1.54157	0.740657	0.843	0.722	0.868	0.579
C6orf48	0.432	1.53801	0.490063	0.864	0.853	1.01	0.784
PPP1R12B	0.432	1.53801	0.554826	0.937	0.898	1.754	1.387
TOB1	0.432	1.53801	1.0397	0.529	0.409	0.419	0.219
TXNIP	0.432	1.53801	0.91521	0.848	0.613	1.23	0.777
WDR6	0.432	1.53801	0.641077	0.801	0.736	0.751	0.524
SMYD1	0.432	1.53801	0.705874	0.932	0.781	1.387	0.993
CACNA1D	0.43	1.53089	1.26403	0.518	0.249	0.414	0.187
CERK	0.43	1.53089	0.767445	0.628	0.587	0.531	0.335
MLF1	0.43	1.53089	0.790635	0.712	0.573	0.623	0.392
PNISR	0.43	1.53089	0.504273	0.911	0.902	1.301	1.023
HRC	0.429	1.52733	0.954547	0.764	0.487	0.654	0.374
HSDL1	0.429	1.52733	0.863292	0.565	0.474	0.438	0.257
AFF1	0.428	1.52377	0.634721	0.775	0.703	0.767	0.538
CYB5A	0.428	1.52377	0.822454	0.649	0.546	0.539	0.329
GAS5	0.428	1.52377	0.580807	0.838	0.81	0.886	0.648
LRRFIP1	0.428	1.52377	0.511439	0.838	0.812	0.982	0.752
SREBF2	0.428	1.52377	0.930399	0.602	0.575	0.672	0.391
SUCLA2	0.428	1.52377	0.766084	0.717	0.56	0.538	0.34
CHCHD10	0.427	1.52021	0.559715	0.948	0.885	1.352	1.038
ITGA7	0.427	1.52021	1.1127	0.513	0.327	0.406	0.202
MT-TL1	0.427	1.52021	0.767145	0.665	0.548	0.562	0.356
RHOQ	0.427	1.52021	0.445557	0.901	0.914	1.196	0.962
DLC1	0.426	1.51665	0.904693	0.67	0.538	0.698	0.414
ERBB2	0.426	1.51665	0.955207	0.639	0.462	0.466	0.259
NUBPL	0.426	1.51665	1.05589	0.518	0.389	0.405	0.209
RNF150	0.426	1.51665	0.976809	0.618	0.468	0.494	0.272
SORBS2	0.426	1.51665	0.654547	0.979	0.9	2.176	1.694
PPP1R16A	0.425	1.51309	0.911116	0.571	0.44	0.411	0.233
SRSF6	0.425	1.51309	0.580316	0.838	0.783	0.868	0.634
AKR1B1	0.424	1.50953	0.661178	0.775	0.73	0.818	0.568
ATF7IP	0.424	1.50953	0.720894	0.749	0.644	0.766	0.511
MRPS25	0.424	1.50953	0.797734	0.628	0.519	0.472	0.29
GOT1	0.423	1.50597	0.631735	0.869	0.796	1.147	0.835
PFKM	0.423	1.50597	0.469394	0.822	0.781	0.859	0.667
MANBA	0.422	1.50241	0.925737	0.597	0.431	0.443	0.25
ZADH2	0.422	1.50241	1.14135	0.508	0.299	0.33	0.159
ZNF521	0.422	1.50241	1.02999	0.56	0.36	0.429	0.226
C12orf75	0.421	1.49885	0.923167	0.539	0.427	0.439	0.248
SH3PXD2A	0.42	1.49529	0.850885	0.628	0.489	0.476	0.283
B2M	0.419	1.49173	0.489854	0.921	0.865	1.167	0.916
CALCOCO1	0.419	1.49173	0.929882	0.607	0.489	0.497	0.282
SH3KBP1	0.419	1.49173	0.56671	0.723	0.716	0.82	0.601
USF2	0.419	1.49173	0.778952	0.649	0.569	0.545	0.342
NDUFB1	0.418	1.48817	0.762523	0.759	0.622	0.648	0.416
NDUFA10	0.417	1.48461	0.650449	0.78	0.695	0.697	0.481
SCP2	0.417	1.48461	0.592061	0.78	0.73	0.804	0.58
ANAPC16	0.416	1.48105	0.586944	0.853	0.765	0.871	0.634
CFLAR	0.416	1.48105	0.528961	0.853	0.81	1.009	0.767
LCLAT1	0.416	1.48105	0.93191	0.534	0.391	0.362	0.201
LUC7L3	0.416	1.48105	0.456475	0.906	0.881	1.297	1.044
PPARGC1A	0.416	1.48105	0.843959	0.728	0.524	0.678	0.416
TBC1D4	0.416	1.48105	0.833321	0.654	0.472	0.527	0.319
ECH1	0.415	1.47749	0.436827	0.942	0.904	1.183	0.955
LINC00674	0.415	1.47749	0.46273	0.864	0.822	0.891	0.696
MPC2	0.415	1.47749	0.740014	0.723	0.593	0.578	0.373
NARF	0.415	1.47749	1.01554	0.524	0.333	0.327	0.171
PYGM	0.415	1.47749	1.01904	0.524	0.376	0.435	0.231
UQCRB	0.415	1.47749	0.657491	0.838	0.718	0.755	0.522
FGF13	0.413	1.47037	0.929516	0.565	0.407	0.444	0.25
MT-ND4L	0.413	1.47037	0.406808	0.979	0.988	2.326	2.01
PSME1	0.413	1.47037	0.659269	0.78	0.654	0.68	0.466
TRIM2	0.413	1.47037	0.864785	0.586	0.438	0.464	0.273
SMPX	0.413	1.47037	0.638	0.932	0.791	1.506	1.126
DCAF6	0.412	1.46681	0.706175	0.639	0.544	0.534	0.35
BCKDHA	0.411	1.46325	0.964641	0.539	0.378	0.378	0.206
CBX6	0.411	1.46325	0.780295	0.717	0.581	0.653	0.415
CPVL	0.411	1.46325	0.78039	0.613	0.507	0.508	0.317
ECI1	0.411	1.46325	0.666595	0.738	0.638	0.643	0.437
FBXO32	0.411	1.46325	0.991779	0.613	0.329	0.64	0.357
MGAT5	0.411	1.46325	0.730735	0.623	0.558	0.546	0.353
TOM1L2	0.411	1.46325	0.789317	0.623	0.509	0.494	0.306
VEGFB	0.411	1.46325	0.594576	0.832	0.742	0.845	0.611
FBXO9	0.41	1.45969	0.548021	0.848	0.773	0.856	0.636
GLCCI1	0.41	1.45969	0.823813	0.623	0.489	0.501	0.304
RBMS1	0.41	1.45969	0.504022	0.916	0.875	1.119	0.869
ANK2	0.409	1.45613	0.715569	0.634	0.552	0.547	0.357
SATB1	0.409	1.45613	1.01141	0.545	0.37	0.426	0.227
PMEPA1	0.407	1.44901	1.08025	0.508	0.325	0.453	0.232
TBX5	0.407	1.44901	0.483784	0.948	0.877	1.297	1.03
CORO6	0.406	1.44545	0.628357	0.785	0.677	0.817	0.578
EVL	0.406	1.44545	0.707151	0.634	0.55	0.491	0.32
MRPL21	0.406	1.44545	0.676428	0.67	0.601	0.539	0.36
FSIP2	0.405	1.44188	0.965783	0.539	0.374	0.452	0.249
HIST1H2BK	0.405	1.44188	0.878796	0.602	0.425	0.511	0.3
NEK7	0.405	1.44188	0.646417	0.791	0.671	0.717	0.497
PCMTD1	0.405	1.44188	0.790043	0.639	0.538	0.547	0.341
PLEKHA5	0.405	1.44188	0.543204	0.817	0.759	0.83	0.617
ZNF302	0.405	1.44188	1.03555	0.513	0.346	0.373	0.194
GBA2	0.404	1.43832	0.619881	0.702	0.622	0.598	0.416
ACVR2B	0.403	1.43476	0.625767	0.681	0.607	0.6	0.416
EHD4	0.403	1.43476	0.754285	0.618	0.503	0.466	0.294
ERCC-00095	0.403	1.43476	0.790292	0.602	0.589	0.571	0.357
IDH3B	0.403	1.43476	0.625689	0.775	0.65	0.65	0.453
NNT	0.403	1.43476	0.578352	0.817	0.748	0.919	0.675
RBM24	0.403	1.43476	0.441486	0.916	0.877	1.392	1.135
SNHG8	0.403	1.43476	0.792763	0.644	0.536	0.495	0.306
ACADVL	0.401	1.42764	0.454143	0.806	0.783	0.822	0.642
GSN	0.401	1.42764	0.83553	0.649	0.454	0.506	0.305
PIAS2	0.401	1.42764	0.701456	0.618	0.536	0.511	0.335
MRPL10	0.4	1.42408	0.578293	0.681	0.605	0.54	0.383
SUCLG1	0.4	1.42408	0.420445	0.827	0.808	0.861	0.687
BMP5	0.4	1.42408	0.586165	0.848	0.765	0.958	0.703
ANKRD26	0.399	1.42052	0.585268	0.654	0.597	0.573	0.406
NDUFC1	0.399	1.42052	0.427864	0.932	0.918	1.126	0.91
USP13	0.399	1.42052	0.63853	0.675	0.607	0.618	0.426
GAB1	0.398	1.41696	0.631975	0.691	0.63	0.632	0.438
MKRN1	0.398	1.41696	0.416972	0.895	0.867	1.097	0.89
EPHA7	0.397	1.4134	0.895655	0.586	0.417	0.54	0.315
KLHL21	0.397	1.4134	0.70776	0.654	0.54	0.556	0.365
NDUFV1	0.397	1.4134	0.543912	0.749	0.691	0.688	0.505
RBM41	0.397	1.4134	0.897382	0.513	0.425	0.401	0.229
TMEM106C	0.397	1.4134	0.766568	0.539	0.434	0.398	0.247
TRPM7	0.397	1.4134	0.643029	0.712	0.587	0.555	0.379
MTIF3	0.395	1.40628	0.788029	0.576	0.483	0.431	0.265
NDUFB10	0.395	1.40628	0.482079	0.791	0.712	0.706	0.538
DUSP5	0.394	1.40272	0.838564	0.639	0.472	0.643	0.394
HECA	0.394	1.40272	0.729058	0.503	0.45	0.416	0.265
IDH3A	0.394	1.40272	0.732918	0.717	0.573	0.687	0.451
TNRC18	0.394	1.40272	0.734293	0.613	0.511	0.493	0.316
UPF3A	0.394	1.40272	0.491952	0.733	0.679	0.666	0.503
ERCC-00076	0.393	1.39916	0.671623	0.738	0.656	0.631	0.427
GSTK1	0.393	1.39916	0.546217	0.775	0.695	0.703	0.516
NDUFS2	0.393	1.39916	0.438497	0.869	0.804	0.95	0.755
NDUFS7	0.393	1.39916	0.650974	0.691	0.618	0.61	0.417
COX14	0.392	1.3956	0.790095	0.56	0.423	0.371	0.226
LBH	0.392	1.3956	0.673069	0.764	0.648	0.879	0.61
PLEKHJ1	0.392	1.3956	0.543529	0.67	0.648	0.566	0.411
NR2F2	0.391	1.39204	0.468587	0.812	0.838	1.181	0.938
COMMD3	0.39	1.38848	0.735479	0.597	0.466	0.443	0.282
MFN2	0.39	1.38848	0.565083	0.738	0.656	0.627	0.452
CLOCK	0.389	1.38492	0.571027	0.733	0.667	0.671	0.484
ADCY6	0.388	1.38136	0.668961	0.66	0.552	0.524	0.351
FAM219B	0.388	1.38136	0.835842	0.503	0.403	0.359	0.212
MTSS1	0.388	1.38136	0.78121	0.571	0.454	0.475	0.295
PRKACA	0.388	1.38136	0.493427	0.743	0.683	0.659	0.497
TMX4	0.388	1.38136	0.695996	0.749	0.579	0.662	0.443
ATP5I	0.387	1.3778	0.553982	0.785	0.699	0.706	0.516
KIF1C	0.387	1.3778	0.495925	0.707	0.646	0.575	0.43
BAG1	0.386	1.37424	0.590713	0.696	0.599	0.556	0.392
DEK	0.386	1.37424	0.499801	0.838	0.773	0.969	0.746
ERCC-00060	0.386	1.37424	0.440741	0.974	0.978	1.455	1.191
HMBOX1	0.386	1.37424	0.597016	0.654	0.579	0.482	0.336
PPCS	0.386	1.37424	0.737022	0.524	0.444	0.415	0.263
RCOR3	0.386	1.37424	0.685267	0.513	0.438	0.37	0.241
ERCC-00092	0.385	1.37068	0.672942	0.696	0.605	0.587	0.395
ZBTB4	0.385	1.37068	0.659964	0.571	0.468	0.399	0.265
COMMD6	0.384	1.36712	0.469307	0.743	0.706	0.634	0.484
KANK2	0.384	1.36712	0.709275	0.618	0.487	0.509	0.332
SMAD9	0.384	1.36712	0.688072	0.576	0.521	0.527	0.349
TFDP2	0.384	1.36712	0.674962	0.686	0.538	0.547	0.366
CPSF6	0.383	1.36356	0.486524	0.707	0.663	0.62	0.468
NDRG3	0.383	1.36356	0.773935	0.529	0.399	0.372	0.229
SLK	0.383	1.36356	0.601962	0.66	0.593	0.6	0.422
BARD1	0.382	1.36	0.785047	0.534	0.431	0.421	0.259
FBXO18	0.382	1.36	0.544293	0.733	0.689	0.674	0.494
MICAL3	0.382	1.36	0.62947	0.66	0.558	0.519	0.356
MT-TM	0.382	1.36	0.704754	0.634	0.569	0.575	0.379
EDNRA	0.381	1.35644	0.476177	0.895	0.824	1.17	0.925
MPC1	0.381	1.35644	0.485738	0.764	0.716	0.736	0.561
GAMT	0.38	1.35288	0.745319	0.602	0.491	0.468	0.297
NAV2	0.38	1.35288	0.655133	0.576	0.524	0.517	0.349
SFRP1	0.38	1.35288	0.537894	0.89	0.847	1.485	1.163
SIRPA	0.38	1.35288	0.603813	0.597	0.524	0.499	0.347
POPDC2	0.38	1.35288	0.506778	0.921	0.789	1.495	1.189
PNKD	0.379	1.34932	0.483811	0.78	0.673	0.668	0.507
MAT2A	0.378	1.34576	0.505572	0.634	0.583	0.454	0.334
MAVS	0.378	1.34576	0.455718	0.77	0.734	0.702	0.543
XAF1	0.378	1.34576	0.656437	0.586	0.556	0.523	0.353
C2orf68	0.377	1.3422	0.682781	0.539	0.472	0.422	0.277
CEP350	0.377	1.3422	0.495504	0.707	0.652	0.632	0.475
CTDSP1	0.377	1.3422	0.669917	0.55	0.456	0.368	0.242
FAM217B	0.377	1.3422	0.656536	0.634	0.503	0.461	0.309
MTR	0.377	1.3422	0.5853	0.613	0.599	0.569	0.403
PDHX	0.377	1.3422	0.582655	0.597	0.524	0.422	0.295
THEM4	0.377	1.3422	0.60767	0.628	0.532	0.463	0.32
TRIM44	0.377	1.3422	0.421936	0.775	0.781	0.777	0.616
NAP1L3	0.376	1.33864	0.760452	0.508	0.399	0.352	0.218
SNHG1	0.376	1.33864	0.459881	0.827	0.779	0.952	0.748
ASB8	0.375	1.33508	0.677866	0.513	0.438	0.361	0.236
CCDC8	0.375	1.33508	0.617906	0.55	0.501	0.438	0.3
TANC2	0.375	1.33508	0.74312	0.571	0.45	0.451	0.286
ATP1B1	0.374	1.33152	0.441296	0.895	0.843	1.234	0.997
GSTM4	0.374	1.33152	0.583516	0.639	0.569	0.547	0.387
MAPKBP1	0.374	1.33152	0.70091	0.534	0.417	0.378	0.244
PERP	0.374	1.33152	0.412606	0.749	0.716	0.7	0.555
MT-TI	0.373	1.32796	0.64589	0.618	0.485	0.475	0.321
PLAG1	0.373	1.32796	0.674207	0.623	0.466	0.483	0.321
C20orf166-AS1	0.372	1.3244	0.552917	0.696	0.628	0.694	0.507
FASTKD1	0.372	1.3244	0.620405	0.508	0.442	0.357	0.242
LRBA	0.372	1.3244	0.570823	0.67	0.581	0.551	0.393
PPIF	0.372	1.3244	0.431563	0.812	0.773	0.829	0.656
SMTNL2	0.372	1.3244	0.702928	0.592	0.407	0.433	0.281
VSNL1	0.372	1.3244	0.75227	0.55	0.409	0.566	0.362
ZFAND6	0.372	1.3244	0.675138	0.524	0.452	0.356	0.233
CXXC5	0.371	1.32084	0.73905	0.524	0.37	0.411	0.26
JMJD1C	0.371	1.32084	0.420744	0.812	0.802	0.972	0.781
MCM3	0.371	1.32084	0.684568	0.513	0.46	0.421	0.276
NDUFB7	0.371	1.32084	0.476404	0.764	0.677	0.624	0.474
WDR59	0.371	1.32084	0.632232	0.581	0.479	0.415	0.281
TRIM55	0.371	1.32084	0.503336	0.864	0.744	1.078	0.835
MCC	0.37	1.31728	0.619517	0.597	0.517	0.516	0.356
MDM4	0.37	1.31728	0.428312	0.754	0.73	0.683	0.536
MRPS18B	0.37	1.31728	0.503108	0.66	0.593	0.535	0.397
NBAS	0.37	1.31728	0.607943	0.555	0.489	0.395	0.271
PBX1	0.37	1.31728	0.42664	0.901	0.838	1.145	0.927
ZDHHC21	0.37	1.31728	0.594065	0.597	0.499	0.418	0.29
DNAJB2	0.369	1.31372	0.621874	0.581	0.47	0.38	0.258
MYLK3	0.369	1.31372	0.476837	0.796	0.753	0.989	0.772
PKIA	0.369	1.31372	0.540798	0.77	0.663	0.8	0.594
RPRD2	0.369	1.31372	0.546018	0.67	0.603	0.53	0.383
SNX13	0.369	1.31372	0.609775	0.539	0.497	0.415	0.285
ZNF330	0.369	1.31372	0.503288	0.613	0.577	0.495	0.366
GABPB1-AS1	0.368	1.31016	0.614707	0.503	0.419	0.343	0.233
NDUFA8	0.368	1.31016	0.44102	0.712	0.65	0.582	0.45
PLCL2	0.368	1.31016	0.564319	0.628	0.55	0.525	0.375
RMDN1	0.368	1.31016	0.542194	0.513	0.489	0.366	0.261
TSC22D4	0.368	1.31016	0.658343	0.571	0.483	0.443	0.296
MTFR1L	0.367	1.3066	0.465896	0.686	0.638	0.54	0.41
BOD1L1	0.366	1.30304	0.498286	0.728	0.65	0.657	0.494
DNAJB9	0.366	1.30304	0.465087	0.644	0.587	0.517	0.392
NDUFS3	0.366	1.30304	0.408035	0.728	0.708	0.621	0.491
SLC25A11	0.366	1.30304	0.555976	0.691	0.591	0.574	0.414
SMAD4	0.366	1.30304	0.559171	0.576	0.495	0.393	0.278
ST3GAL6	0.366	1.30304	0.516971	0.613	0.548	0.482	0.353
ZNF280D	0.366	1.30304	0.649181	0.503	0.417	0.372	0.248
CITED2	0.364	1.29592	0.600409	0.681	0.558	0.551	0.386
IVD	0.364	1.29592	0.49676	0.581	0.548	0.436	0.322
KIAA1715	0.364	1.29592	0.657575	0.529	0.405	0.342	0.226
ATP1B2	0.363	1.29236	0.409451	0.969	0.881	1.292	1.064
DCAF11	0.363	1.29236	0.603656	0.571	0.462	0.373	0.256
HDAC9	0.363	1.29236	0.622474	0.639	0.503	0.51	0.351
UBXN2B	0.363	1.29236	0.678903	0.513	0.413	0.348	0.227
MSH6	0.362	1.2888	0.603789	0.55	0.489	0.444	0.307
RHOD	0.362	1.2888	0.606274	0.524	0.45	0.375	0.257
ZNF827	0.362	1.2888	0.50169	0.66	0.636	0.638	0.478
PRKAR2B	0.361	1.28524	0.550275	0.654	0.542	0.58	0.42
ZBED5	0.361	1.28524	0.446628	0.649	0.607	0.524	0.402
MT-ND6	0.36	1.28168	0.485159	0.707	0.667	0.763	0.583
NDUFS8	0.36	1.28168	0.40232	0.665	0.658	0.518	0.408
PIAS1	0.36	1.28168	0.555822	0.539	0.505	0.422	0.3
PLAGL2	0.36	1.28168	0.553254	0.576	0.503	0.42	0.299
MYOM1	0.36	1.28168	0.522783	0.953	0.818	1.693	1.353
BNIP2	0.359	1.27812	0.530746	0.586	0.528	0.429	0.31
NUDT4	0.359	1.27812	0.602227	0.581	0.456	0.456	0.316
SPATA20	0.359	1.27812	0.518698	0.565	0.511	0.414	0.301
AHDC1	0.358	1.27455	0.551707	0.586	0.501	0.425	0.303
IGBP1	0.358	1.27455	0.434491	0.691	0.636	0.565	0.438
VEGFA	0.358	1.27455	0.440826	0.806	0.714	0.869	0.686
ZNF592	0.358	1.27455	0.605505	0.503	0.411	0.317	0.216
MBOAT2	0.357	1.27099	0.58732	0.555	0.466	0.397	0.276
PARM1	0.357	1.27099	0.591313	0.539	0.442	0.464	0.324
RPAIN	0.357	1.27099	0.432501	0.681	0.622	0.511	0.395
TIMM13	0.357	1.27099	0.48631	0.618	0.532	0.419	0.311
LYRM7	0.356	1.26743	0.473603	0.607	0.595	0.531	0.401
NAB1	0.356	1.26743	0.50709	0.623	0.558	0.5	0.369
PURA	0.356	1.26743	0.56756	0.623	0.528	0.471	0.334
KIF26B	0.356	1.26743	0.418053	0.644	0.624	0.605	0.475
PCMTD2	0.355	1.26387	0.499233	0.634	0.552	0.464	0.343
RAPGEF2	0.355	1.26387	0.436159	0.618	0.597	0.537	0.415
TET2	0.355	1.26387	0.576928	0.545	0.493	0.4	0.28
TRPT1	0.355	1.26387	0.564803	0.503	0.476	0.356	0.25
FAM3A	0.354	1.26031	0.478825	0.576	0.538	0.421	0.314
VPS39	0.354	1.26031	0.518183	0.539	0.493	0.382	0.277
TRH	0.354	1.26031	0.492693	0.838	0.699	1.211	0.952
CBX4	0.353	1.25675	0.554973	0.534	0.47	0.392	0.278
GFM1	0.353	1.25675	0.43324	0.586	0.593	0.5	0.386
KLHDC2	0.353	1.25675	0.427117	0.571	0.558	0.437	0.337
NEK9	0.353	1.25675	0.426179	0.639	0.593	0.483	0.374
PNMAL1	0.353	1.25675	0.629506	0.524	0.423	0.359	0.242
RPP14	0.353	1.25675	0.416661	0.649	0.63	0.51	0.398
ACTN2	0.352	1.25319	0.455758	1	0.951	2.468	2.106
PALM2	0.352	1.25319	0.418436	0.728	0.658	0.695	0.549
PDXP	0.352	1.25319	0.475253	0.586	0.517	0.433	0.324
RNF34	0.352	1.25319	0.476859	0.534	0.501	0.392	0.292
TOB2	0.352	1.25319	0.432735	0.654	0.597	0.526	0.407
ASB2	0.351	1.24963	0.501841	0.597	0.497	0.591	0.441
BOD1	0.351	1.24963	0.487598	0.529	0.501	0.35	0.258
ERCC-00162	0.351	1.24963	0.576618	0.534	0.468	0.415	0.291
REEP1	0.351	1.24963	0.49507	0.712	0.54	0.59	0.442
MPPED2	0.35	1.24607	0.485498	0.586	0.534	0.486	0.363
PHLDB1	0.35	1.24607	0.525277	0.555	0.493	0.405	0.293
R3HDM2	0.35	1.24607	0.468786	0.534	0.515	0.403	0.302
ZNF362	0.35	1.24607	0.488742	0.597	0.519	0.465	0.346
ARMCX1	0.349	1.24251	0.468099	0.571	0.536	0.435	0.327
FBXW2	0.349	1.24251	0.415081	0.623	0.56	0.46	0.358
RNF115	0.349	1.24251	0.453177	0.675	0.603	0.632	0.487
C22orf39	0.348	1.23895	0.504301	0.503	0.452	0.335	0.244
DHFR	0.348	1.23895	0.547194	0.581	0.46	0.533	0.385
HADH	0.347	1.23539	0.404726	0.654	0.585	0.504	0.396
STT3B	0.347	1.23539	0.513234	0.571	0.519	0.52	0.383
THYN1	0.347	1.23539	0.509098	0.508	0.464	0.348	0.253
MRPS9	0.346	1.23183	0.446746	0.539	0.495	0.358	0.271
NAA35	0.346	1.23183	0.462001	0.534	0.497	0.373	0.28
SEMA3A	0.346	1.23183	0.420441	0.733	0.661	0.817	0.65
XPO4	0.346	1.23183	0.424902	0.743	0.697	0.801	0.635
SCAI	0.345	1.22827	0.521098	0.513	0.458	0.396	0.287
SLC16A7	0.345	1.22827	0.516699	0.524	0.446	0.367	0.266
CXXC4	0.344	1.22471	0.49062	0.534	0.47	0.437	0.324
EXOC7	0.344	1.22471	0.458348	0.508	0.452	0.323	0.242
SYNGR1	0.344	1.22471	0.444413	0.597	0.511	0.392	0.298
ZSWIM7	0.344	1.22471	0.474806	0.56	0.493	0.359	0.267
DOCK9	0.343	1.22115	0.514023	0.529	0.436	0.389	0.283
PAGR1	0.343	1.22115	0.440683	0.55	0.485	0.372	0.283
ARMC8	0.342	1.21759	0.436193	0.592	0.593	0.457	0.351
TSC22D2	0.342	1.21759	0.417066	0.576	0.575	0.468	0.364
ARHGEF9	0.341	1.21403	0.431521	0.524	0.503	0.375	0.287
FOXJ3	0.341	1.21403	0.422597	0.581	0.534	0.412	0.318
SCRIB	0.341	1.21403	0.439651	0.513	0.483	0.359	0.273
SOX12	0.341	1.21403	0.402145	0.581	0.554	0.397	0.31
MRPL12	0.34	1.21047	0.439422	0.534	0.501	0.35	0.266
ZNF160	0.34	1.21047	0.475428	0.513	0.45	0.35	0.26
ST7	0.339	1.20691	0.401012	0.628	0.589	0.498	0.392
ZNHIT3	0.339	1.20691	0.545374	0.508	0.47	0.364	0.259
ACADSB	0.338	1.20335	0.409874	0.545	0.548	0.435	0.339
C6orf89	0.338	1.20335	0.457929	0.513	0.436	0.332	0.249
ZDHHC7	0.338	1.20335	0.40843	0.581	0.534	0.406	0.316
MOCS2	0.337	1.19979	0.410483	0.534	0.544	0.409	0.318
DNPH1	0.334	1.18911	0.430194	0.503	0.45	0.334	0.255
PLXNB2	0.334	1.18911	0.412519	0.56	0.519	0.397	0.308
TRIM13	0.334	1.18911	0.406298	0.592	0.546	0.398	0.31
PDZRN3	0.333	1.18555	0.417728	0.529	0.485	0.397	0.307
TTC14	0.333	1.18555	0.419944	0.555	0.436	0.361	0.278
ZNF385B	0.333	1.18555	0.442708	0.524	0.466	0.494	0.379
MLLT3	0.328	1.16775	0.41793	0.565	0.427	0.387	0.299

## Sheet: GO terms seg 4 > seg 3
GO term analysis: seg 5 > seg 3
Analysis Type:	PANTHER Overrepresentation Test (Released 20210224)
Annotation Version and Release Date:	GO Ontology database DOI: 10.5281/zenodo.5228828 Released 2021-08-18
Analyzed List:	upload_1 (Homo sapiens)
Reference List:	Homo sapiens (all genes in database)
Test Type:	FISHER
Correction:	FDR
GO biological process complete	Homo sapiens - REFLIST (20595)	upload_1 (569)	upload_1 (expected)	upload_1 (over/under)	upload_1 (fold Enrichment)	upload_1 (raw P-value)	upload_1 (FDR)
generation of precursor metabolites and energy (GO:0006091)	391	58	10.8	+	5.37	2.02e-23	3.17e-19
energy derivation by oxidation of organic compounds (GO:0015980)	245	44	6.77	+	6.5	8.02e-21	4.2e-17
muscle system process (GO:0003012)	271	46	7.49	+	6.14	7.63e-21	6e-17
muscle structure development (GO:0061061)	477	59	13.18	+	4.48	2.71e-20	1.07e-16
cellular respiration (GO:0045333)	180	37	4.97	+	7.44	2.17e-19	6.82e-16
striated muscle tissue development (GO:0014706)	288	45	7.96	+	5.66	3.66e-19	9.59e-16
muscle contraction (GO:0006936)	222	40	6.13	+	6.52	4.48e-19	1.01e-15
aerobic respiration (GO:0009060)	153	34	4.23	+	8.04	8.02e-19	1.58e-15
ATP metabolic process (GO:0046034)	202	38	5.58	+	6.81	9.8e-19	1.71e-15
regulation of heart contraction (GO:0008016)	193	37	5.33	+	6.94	1.64e-18	2.58e-15
muscle tissue development (GO:0060537)	303	45	8.37	+	5.38	2.11e-18	3.01e-15
heart development (GO:0007507)	533	59	14.73	+	4.01	3.34e-18	4.38e-15
heart process (GO:0003015)	104	28	2.87	+	9.74	1.45e-17	1.75e-14
cardiac muscle tissue development (GO:0048738)	171	34	4.72	+	7.2	1.57e-17	1.76e-14
regulation of blood circulation (GO:1903522)	243	39	6.71	+	5.81	4.15e-17	4.35e-14
striated muscle contraction (GO:0006941)	107	27	2.96	+	9.13	2.2e-16	2.16e-13
muscle cell differentiation (GO:0042692)	252	38	6.96	+	5.46	6.54e-16	6.04e-13
cardiac muscle contraction (GO:0060048)	75	23	2.07	+	11.1	1.09e-15	9.56e-13
muscle cell development (GO:0055001)	151	30	4.17	+	7.19	1.31e-15	1.08e-12
circulatory system development (GO:0072359)	870	71	24.04	+	2.95	3.31e-15	2.6e-12
heart contraction (GO:0060047)	91	24	2.51	+	9.55	4.49e-15	3.36e-12
regulation of system process (GO:0044057)	553	54	15.28	+	3.53	1.22e-14	8.7e-12
striated muscle cell differentiation (GO:0051146)	193	32	5.33	+	6	1.31e-14	8.96e-12
cardiac muscle cell development (GO:0055013)	59	19	1.63	+	11.66	1.65e-13	1.08e-10
regulation of muscle system process (GO:0090257)	231	33	6.38	+	5.17	2.16e-13	1.36e-10
oxidative phosphorylation (GO:0006119)	113	24	3.12	+	7.69	2.69e-13	1.62e-10
cardiac cell development (GO:0055006)	64	19	1.77	+	10.75	5.56e-13	3.24e-10
cardiocyte differentiation (GO:0035051)	109	23	3.01	+	7.64	9.52e-13	5.34e-10
circulatory system process (GO:0003013)	490	47	13.54	+	3.47	1.26e-12	6.8e-10
blood circulation (GO:0008015)	399	42	11.02	+	3.81	1.33e-12	6.99e-10
aerobic electron transport chain (GO:0019646)	80	20	2.21	+	9.05	2.03e-12	1.03e-09
electron transport chain (GO:0022900)	166	27	4.59	+	5.89	2.34e-12	1.15e-09
regulation of striated muscle contraction (GO:0006942)	92	21	2.54	+	8.26	2.55e-12	1.22e-09
respiratory electron transport chain (GO:0022904)	105	22	2.9	+	7.58	3.37e-12	1.56e-09
cardiac muscle cell differentiation (GO:0055007)	83	20	2.29	+	8.72	3.62e-12	1.63e-09
ATP synthesis coupled electron transport (GO:0042773)	85	20	2.35	+	8.52	5.27e-12	2.24e-09
regulation of cation transmembrane transport (GO:1904062)	347	38	9.59	+	3.96	5.52e-12	2.28e-09
mitochondrial ATP synthesis coupled electron transport (GO:0042775)	85	20	2.35	+	8.52	5.27e-12	2.3e-09
regulation of ion transmembrane transporter activity (GO:0032412)	259	32	7.16	+	4.47	1.63e-11	6.56e-09
muscle organ development (GO:0007517)	284	33	7.85	+	4.21	3.44e-11	1.35e-08
cardiac chamber development (GO:0003205)	162	25	4.48	+	5.59	4.21e-11	1.54e-08
mitochondrial electron transport, NADH to ubiquinone (GO:0006120)	45	15	1.24	+	12.07	4.02e-11	1.54e-08
regulation of transmembrane transporter activity (GO:0022898)	270	32	7.46	+	4.29	4.33e-11	1.55e-08
regulation of muscle contraction (GO:0006937)	162	25	4.48	+	5.59	4.21e-11	1.58e-08
regulation of metal ion transport (GO:0010959)	394	39	10.89	+	3.58	4.72e-11	1.65e-08
regulation of heart rate (GO:0002027)	100	20	2.76	+	7.24	6.76e-11	2.31e-08
anatomical structure morphogenesis (GO:0009653)	2130	112	58.85	+	1.9	7.42e-11	2.48e-08
regulation of cardiac muscle contraction by calcium ion signaling (GO:0010882)	26	12	0.72	+	16.71	1.82e-10	5.72e-08
cardiac chamber morphogenesis (GO:0003206)	119	21	3.29	+	6.39	1.75e-10	5.73e-08
regulation of transporter activity (GO:0032409)	287	32	7.93	+	4.04	1.79e-10	5.74e-08
regulation of cardiac muscle contraction (GO:0055117)	74	17	2.04	+	8.32	2.88e-10	8.87e-08
regulation of molecular function (GO:0065009)	3060	143	84.54	+	1.69	3.23e-10	9.75e-08
regulation of release of sequestered calcium ion into cytosol by sarcoplasmic reticulum (GO:0010880)	28	12	0.77	+	15.51	3.57e-10	1.06e-07
regulation of localization (GO:0032879)	2709	130	74.84	+	1.74	6.54e-10	1.9e-07
Unclassified (UNCLASSIFIED)	2897	33	80.04	-	0.41	7.57e-10	2.13e-07
tissue development (GO:0009888)	1597	89	44.12	+	2.02	7.82e-10	2.16e-07
myofibril assembly (GO:0030239)	58	15	1.6	+	9.36	7.97e-10	2.16e-07
biological_process (GO:0008150)	17698	536	488.96	+	1.1	7.57e-10	2.16e-07
striated muscle cell development (GO:0055002)	59	15	1.63	+	9.2	9.75e-10	2.6e-07
cellular metabolic process (GO:0044237)	7029	265	194.2	+	1.36	1.72e-09	4.5e-07
actin filament-based process (GO:0030029)	599	46	16.55	+	2.78	2.03e-09	5.22e-07
negative regulation of cellular process (GO:0048523)	4785	196	132.2	+	1.48	2.7e-09	6.85e-07
regulation of ion transmembrane transport (GO:0034765)	481	40	13.29	+	3.01	3.02e-09	7.53e-07
ventricular cardiac muscle tissue development (GO:0003229)	55	14	1.52	+	9.21	3.49e-09	8.58e-07
cardiac conduction (GO:0061337)	66	15	1.82	+	8.23	3.66e-09	8.85e-07
metabolic process (GO:0008152)	7882	288	217.76	+	1.32	4.21e-09	1e-06
regulation of ATPase activity (GO:0043462)	46	13	1.27	+	10.23	4.36e-09	1.02e-06
regulation of cardiac muscle contraction by regulation of the release of sequestered calcium ion (GO:0010881)	21	10	0.58	+	17.24	4.86e-09	1.12e-06
regulation of biological quality (GO:0065008)	3705	160	102.36	+	1.56	5.94e-09	1.35e-06
cardiac ventricle development (GO:0003231)	123	19	3.4	+	5.59	9.1e-09	2.04e-06
cellular component assembly involved in morphogenesis (GO:0010927)	97	17	2.68	+	6.34	1.05e-08	2.33e-06
heart morphogenesis (GO:0003007)	238	26	6.58	+	3.95	1.36e-08	2.94e-06
regulation of calcium ion transmembrane transport (GO:1903169)	156	21	4.31	+	4.87	1.35e-08	2.94e-06
cell communication involved in cardiac conduction (GO:0086065)	43	12	1.19	+	10.1	1.94e-08	4.13e-06
animal organ development (GO:0048513)	3079	137	85.07	+	1.61	2.04e-08	4.27e-06
regulation of calcium ion transmembrane transporter activity (GO:1901019)	89	16	2.46	+	6.51	2.07e-08	4.29e-06
anatomical structure formation involved in morphogenesis (GO:0048646)	881	56	24.34	+	2.3	2.21e-08	4.51e-06
tissue morphogenesis (GO:0048729)	542	41	14.97	+	2.74	2.33e-08	4.7e-06
regulation of the force of heart contraction (GO:0002026)	26	10	0.72	+	13.92	2.47e-08	4.91e-06
regulation of transmembrane transport (GO:0034762)	569	42	15.72	+	2.67	2.99e-08	5.87e-06
mitochondrial respiratory chain complex assembly (GO:0033108)	93	16	2.57	+	6.23	3.58e-08	6.95e-06
ventricular cardiac muscle tissue morphogenesis (GO:0055010)	46	12	1.27	+	9.44	3.67e-08	7.04e-06
response to decreased oxygen levels (GO:0036293)	307	29	8.48	+	3.42	3.85e-08	7.29e-06
response to inorganic substance (GO:0010035)	554	41	15.31	+	2.68	4.11e-08	7.68e-06
positive regulation of cation transmembrane transport (GO:1904064)	152	20	4.2	+	4.76	4.19e-08	7.75e-06
actomyosin structure organization (GO:0031032)	108	17	2.98	+	5.7	4.3e-08	7.85e-06
mitochondrial respiratory chain complex I assembly (GO:0032981)	58	13	1.6	+	8.11	4.66e-08	8.33e-06
NADH dehydrogenase complex assembly (GO:0010257)	58	13	1.6	+	8.11	4.66e-08	8.42e-06
mitochondrion organization (GO:0007005)	409	34	11.3	+	3.01	4.78e-08	8.44e-06
cardiac ventricle morphogenesis (GO:0003208)	70	14	1.93	+	7.24	4.95e-08	8.55e-06
response to hypoxia (GO:0001666)	292	28	8.07	+	3.47	4.95e-08	8.65e-06
negative regulation of biological process (GO:0048519)	5187	203	143.31	+	1.42	5.27e-08	9.01e-06
positive regulation of ion transmembrane transporter activity (GO:0032414)	110	17	3.04	+	5.59	5.46e-08	9.22e-06
cardiac muscle tissue morphogenesis (GO:0055008)	59	13	1.63	+	7.98	5.55e-08	9.28e-06
regulation of membrane potential (GO:0042391)	434	35	11.99	+	2.92	6.05e-08	1e-05
response to oxygen levels (GO:0070482)	334	30	9.23	+	3.25	6.29e-08	1.03e-05
cardiac muscle cell action potential (GO:0086001)	49	12	1.35	+	8.86	6.66e-08	1.08e-05
cell communication by electrical coupling involved in cardiac conduction (GO:0086064)	15	8	0.41	+	19.3	8.92e-08	1.43e-05
regulation of potassium ion transmembrane transport (GO:1901379)	87	15	2.4	+	6.24	9.33e-08	1.48e-05
regulation of calcium ion transport into cytosol (GO:0010522)	101	16	2.79	+	5.73	9.91e-08	1.56e-05
regulation of transport (GO:0051049)	1732	87	47.85	+	1.82	1.22e-07	1.88e-05
regulation of sodium ion transport (GO:0002028)	89	15	2.46	+	6.1	1.21e-07	1.89e-05
positive regulation of potassium ion transmembrane transport (GO:1901381)	42	11	1.16	+	9.48	1.32e-07	2.01e-05
positive regulation of ion transmembrane transport (GO:0034767)	168	20	4.64	+	4.31	1.84e-07	2.79e-05
positive regulation of transporter activity (GO:0032411)	121	17	3.34	+	5.09	1.87e-07	2.8e-05
regulation of multicellular organismal process (GO:0051239)	2578	116	71.23	+	1.63	1.97e-07	2.92e-05
muscle tissue morphogenesis (GO:0060415)	67	13	1.85	+	7.02	2.03e-07	2.98e-05
response to hormone (GO:0009725)	772	49	21.33	+	2.3	2.08e-07	3.02e-05
system development (GO:0048731)	4169	168	115.18	+	1.46	2.17e-07	3.13e-05
multicellular organism development (GO:0007275)	4525	179	125.02	+	1.43	2.8e-07	3.99e-05
carboxylic acid metabolic process (GO:0019752)	808	50	22.32	+	2.24	3.83e-07	5.42e-05
developmental process (GO:0032502)	5565	210	153.75	+	1.37	3.88e-07	5.45e-05
regulation of actin filament-based movement (GO:1903115)	38	10	1.05	+	9.53	4.75e-07	6.56e-05
cell differentiation (GO:0030154)	3403	142	94.02	+	1.51	4.73e-07	6.58e-05
cell communication by electrical coupling (GO:0010644)	20	8	0.55	+	14.48	5.02e-07	6.81e-05
positive regulation of potassium ion transport (GO:0043268)	49	11	1.35	+	8.13	5e-07	6.84e-05
regulation of potassium ion transport (GO:0043266)	101	15	2.79	+	5.38	5.21e-07	7e-05
actin cytoskeleton organization (GO:0030036)	539	38	14.89	+	2.55	5.25e-07	7e-05
anatomical structure development (GO:0048856)	5001	192	138.17	+	1.39	5.56e-07	7.28e-05
muscle organ morphogenesis (GO:0048644)	74	13	2.04	+	6.36	5.54e-07	7.32e-05
regulation of muscle cell differentiation (GO:0051147)	132	17	3.65	+	4.66	5.68e-07	7.37e-05
positive regulation of molecular function (GO:0044093)	1497	76	41.36	+	1.84	5.83e-07	7.51e-05
regulation of ion transport (GO:0043269)	685	44	18.93	+	2.32	5.87e-07	7.51e-05
oxoacid metabolic process (GO:0043436)	832	50	22.99	+	2.18	6.61e-07	8.37e-05
regulation of hydrolase activity (GO:0051336)	1033	58	28.54	+	2.03	6.89e-07	8.66e-05
tricarboxylic acid cycle (GO:0006099)	30	9	0.83	+	10.86	7.11e-07	8.87e-05
cellular developmental process (GO:0048869)	3463	143	95.68	+	1.49	7.65e-07	9.47e-05
positive regulation of ion transport (GO:0043270)	278	25	7.68	+	3.25	7.76e-07	9.53e-05
organic acid metabolic process (GO:0006082)	854	51	23.59	+	2.16	7.96e-07	9.7e-05
cellular process (GO:0009987)	15074	467	416.47	+	1.12	1.08e-06	0.000129
regulation of release of sequestered calcium ion into cytosol (GO:0051279)	79	13	2.18	+	5.96	1.07e-06	0.000129
regulation of sodium ion transmembrane transport (GO:1902305)	66	12	1.82	+	6.58	1.1e-06	0.000131
regulation of cation channel activity (GO:2001257)	173	19	4.78	+	3.98	1.13e-06	0.000134
monocarboxylic acid metabolic process (GO:0032787)	491	35	13.57	+	2.58	1.42e-06	0.000167
regulation of biological process (GO:0050789)	11528	376	318.5	+	1.18	1.49e-06	0.000174
regulation of programmed cell death (GO:0043067)	1456	73	40.23	+	1.81	1.53e-06	0.000177
regulation of calcium ion transport (GO:0051924)	252	23	6.96	+	3.3	1.7e-06	0.000195
regulation of catalytic activity (GO:0050790)	2393	106	66.11	+	1.6	1.79e-06	0.000201
tube morphogenesis (GO:0035239)	644	41	17.79	+	2.3	1.79e-06	0.000203
positive regulation of transport (GO:0051050)	909	52	25.11	+	2.07	1.78e-06	0.000203
multicellular organismal signaling (GO:0035637)	114	15	3.15	+	4.76	2.05e-06	0.000229
positive regulation of sodium ion transport (GO:0010765)	35	9	0.97	+	9.31	2.11e-06	0.000233
immune response (GO:0006955)	1678	18	46.36	-	0.39	2.14e-06	0.000235
positive regulation of transmembrane transport (GO:0034764)	219	21	6.05	+	3.47	2.34e-06	0.000255
regulation of cell death (GO:0010941)	1593	77	44.01	+	1.75	2.79e-06	0.000299
regulation of apoptotic process (GO:0042981)	1426	71	39.4	+	1.8	2.79e-06	0.0003
detection of chemical stimulus involved in sensory perception (GO:0050907)	488	0	13.48	-	< 0.01	2.77e-06	0.0003
sarcomere organization (GO:0045214)	37	9	1.02	+	8.8	3.13e-06	0.000332
positive regulation of potassium ion transmembrane transporter activity (GO:1901018)	27	8	0.75	+	10.72	3.22e-06	0.00034
pyruvate metabolic process (GO:0006090)	61	11	1.69	+	6.53	3.3e-06	0.000346
ADP metabolic process (GO:0046031)	49	10	1.35	+	7.39	3.5e-06	0.000365
regulation of potassium ion transmembrane transporter activity (GO:1901016)	62	11	1.71	+	6.42	3.79e-06	0.000392
actin-mediated cell contraction (GO:0070252)	63	11	1.74	+	6.32	4.34e-06	0.000446
action potential (GO:0001508)	92	13	2.54	+	5.11	4.87e-06	0.000497
regulation of cellular localization (GO:0060341)	820	47	22.66	+	2.07	5.03e-06	0.00051
regulation of actin filament-based process (GO:0032970)	398	29	11	+	2.64	5.39e-06	0.000543
glycolytic process (GO:0006096)	40	9	1.11	+	8.14	5.42e-06	0.000543
regulation of developmental process (GO:0050793)	2368	103	65.42	+	1.57	5.91e-06	0.000588
ATP generation from ADP (GO:0006757)	41	9	1.13	+	7.95	6.46e-06	0.000638
morphogenesis of an epithelium (GO:0002009)	437	31	12.07	+	2.57	6.77e-06	0.000665
detection of stimulus involved in sensory perception (GO:0050906)	558	1	15.42	-	0.06	6.97e-06	0.000681
positive regulation of sodium ion transmembrane transport (GO:1902307)	21	7	0.58	+	12.07	7.09e-06	0.000688
regulation of muscle adaptation (GO:0043502)	81	12	2.24	+	5.36	7.29e-06	0.000703
negative regulation of cell population proliferation (GO:0008285)	704	42	19.45	+	2.16	7.69e-06	0.000737
detection of chemical stimulus involved in sensory perception of smell (GO:0050911)	443	0	12.24	-	< 0.01	8.95e-06	0.000853
regulation of sodium ion transmembrane transporter activity (GO:2000649)	56	10	1.55	+	6.46	9.94e-06	0.000941
sensory perception of chemical stimulus (GO:0007606)	542	1	14.97	-	0.07	1.01e-05	0.000949
endocardial cushion development (GO:0003197)	44	9	1.22	+	7.4	1.06e-05	0.000995
epithelial tube morphogenesis (GO:0060562)	305	24	8.43	+	2.85	1.07e-05	0.000997
fatty acid beta-oxidation (GO:0006635)	57	10	1.57	+	6.35	1.14e-05	0.00104
regulation of membrane repolarization (GO:0060306)	33	8	0.91	+	8.77	1.14e-05	0.00104
hexose biosynthetic process (GO:0019319)	33	8	0.91	+	8.77	1.14e-05	0.00105
regulation of striated muscle cell differentiation (GO:0051153)	86	12	2.38	+	5.05	1.26e-05	0.00114
animal organ morphogenesis (GO:0009887)	957	51	26.44	+	1.93	1.44e-05	0.0013
nucleoside diphosphate phosphorylation (GO:0006165)	59	10	1.63	+	6.13	1.49e-05	0.00134
primary metabolic process (GO:0044238)	6869	240	189.78	+	1.26	1.51e-05	0.00135
negative regulation of cellular metabolic process (GO:0031324)	2546	107	70.34	+	1.52	1.54e-05	0.00137
carbohydrate catabolic process (GO:0016052)	104	13	2.87	+	4.52	1.61e-05	0.00142
carbohydrate metabolic process (GO:0005975)	469	31	12.96	+	2.39	1.69e-05	0.00148
membrane depolarization (GO:0051899)	47	9	1.3	+	6.93	1.69e-05	0.00149
response to metal ion (GO:0010038)	380	27	10.5	+	2.57	1.72e-05	0.0015
response to organonitrogen compound (GO:0010243)	984	52	27.19	+	1.91	1.75e-05	0.00151
negative regulation of programmed cell death (GO:0043069)	888	48	24.53	+	1.96	1.82e-05	0.00156
regulation of cardiac conduction (GO:1903779)	25	7	0.69	+	10.13	1.84e-05	0.00157
nucleotide phosphorylation (GO:0046939)	61	10	1.69	+	5.93	1.93e-05	0.00164
purine nucleoside diphosphate metabolic process (GO:0009135)	62	10	1.71	+	5.84	2.19e-05	0.00184
purine ribonucleoside diphosphate metabolic process (GO:0009179)	62	10	1.71	+	5.84	2.19e-05	0.00185
monosaccharide biosynthetic process (GO:0046364)	37	8	1.02	+	7.83	2.33e-05	0.00195
regulation of cell communication by electrical coupling (GO:0010649)	17	6	0.47	+	12.77	2.51e-05	0.00208
membrane depolarization during cardiac muscle cell action potential (GO:0086012)	17	6	0.47	+	12.77	2.51e-05	0.00209
regulation of cellular component movement (GO:0051270)	1025	53	28.32	+	1.87	2.55e-05	0.0021
response to peptide hormone (GO:0043434)	367	26	10.14	+	2.56	2.58e-05	0.00211
negative regulation of molecular function (GO:0044092)	1132	57	31.27	+	1.82	2.65e-05	0.00215
cell-cell signaling involved in cardiac conduction (GO:0086019)	27	7	0.75	+	9.38	2.8e-05	0.00225
positive regulation of ATPase activity (GO:0032781)	27	7	0.75	+	9.38	2.8e-05	0.00226
regulation of ryanodine-sensitive calcium-release channel activity (GO:0060314)	27	7	0.75	+	9.38	2.8e-05	0.00227
negative regulation of cell death (GO:0060548)	982	51	27.13	+	1.88	2.84e-05	0.00227
regulation of cellular metabolic process (GO:0031323)	5928	211	163.78	+	1.29	2.93e-05	0.00232
second-messenger-mediated signaling (GO:0019932)	222	19	6.13	+	3.1	3.06e-05	0.00242
calcium-mediated signaling (GO:0019722)	146	15	4.03	+	3.72	3.09e-05	0.00242
ribonucleoside diphosphate metabolic process (GO:0009185)	65	10	1.8	+	5.57	3.14e-05	0.00246
response to organic substance (GO:0010033)	2688	110	74.26	+	1.48	3.23e-05	0.00251
striated muscle adaptation (GO:0014888)	28	7	0.77	+	9.05	3.42e-05	0.00263
regulation of cellular process (GO:0050794)	11076	356	306.01	+	1.16	3.4e-05	0.00264
regulation of cell communication (GO:0010646)	3242	128	89.57	+	1.43	3.46e-05	0.00266
fatty acid oxidation (GO:0019395)	81	11	2.24	+	4.92	3.61e-05	0.00274
response to endogenous stimulus (GO:0009719)	1342	64	37.08	+	1.73	3.6e-05	0.00275
biological regulation (GO:0065007)	12249	387	338.42	+	1.14	3.73e-05	0.00282
supramolecular fiber organization (GO:0097435)	512	32	14.15	+	2.26	3.77e-05	0.00283
positive regulation of calcium ion transmembrane transporter activity (GO:1901021)	40	8	1.11	+	7.24	3.8e-05	0.00284
response to nitrogen compound (GO:1901698)	1071	54	29.59	+	1.82	3.83e-05	0.00285
response to abiotic stimulus (GO:0009628)	1125	56	31.08	+	1.8	3.85e-05	0.00286
positive regulation of hydrolase activity (GO:0051345)	588	35	16.25	+	2.15	4.23e-05	0.00312
regulation of signaling (GO:0023051)	3257	128	89.98	+	1.42	4.6e-05	0.00338
tube development (GO:0035295)	845	45	23.35	+	1.93	4.79e-05	0.0035
membrane depolarization during action potential (GO:0086010)	30	7	0.83	+	8.45	5e-05	0.00364
cardiac muscle cell contraction (GO:0086003)	42	8	1.16	+	6.89	5.16e-05	0.00374
cellular component morphogenesis (GO:0032989)	569	34	15.72	+	2.16	5.33e-05	0.00384
lipid oxidation (GO:0034440)	85	11	2.35	+	4.68	5.38e-05	0.00386
negative regulation of protein modification process (GO:0031400)	500	31	13.81	+	2.24	5.69e-05	0.00405
negative regulation of apoptotic process (GO:0043066)	870	46	24.04	+	1.91	5.69e-05	0.00406
regulation of sequestering of calcium ion (GO:0051282)	119	13	3.29	+	3.95	5.81e-05	0.00411
regulation of metabolic process (GO:0019222)	6586	228	181.96	+	1.25	6.11e-05	0.0043
cardiac septum development (GO:0003279)	103	12	2.85	+	4.22	6.32e-05	0.00444
negative regulation of ATPase activity (GO:0032780)	12	5	0.33	+	15.08	6.53e-05	0.00456
sensory perception of smell (GO:0007608)	468	1	12.93	-	0.08	6.59e-05	0.00458
response to insulin (GO:0032868)	217	18	6	+	3	7.15e-05	0.00495
organelle organization (GO:0006996)	3360	130	92.83	+	1.4	7.33e-05	0.00505
G protein-coupled receptor signaling pathway (GO:0007186)	1216	13	33.6	-	0.39	7.99e-05	0.00548
organic substance metabolic process (GO:0071704)	7404	251	204.56	+	1.23	8.06e-05	0.00551
epithelium development (GO:0060429)	962	49	26.58	+	1.84	8.34e-05	0.00567
regulation of cardiac muscle cell contraction (GO:0086004)	33	7	0.91	+	7.68	8.44e-05	0.00569
muscle adaptation (GO:0043500)	33	7	0.91	+	7.68	8.44e-05	0.00572
skeletal muscle tissue development (GO:0007519)	124	13	3.43	+	3.79	8.53e-05	0.00573
regulation of primary metabolic process (GO:0080090)	5707	201	157.67	+	1.27	9.89e-05	0.00661
positive regulation of cation channel activity (GO:2001259)	76	10	2.1	+	4.76	0.000103	0.00684
response to muscle stretch (GO:0035994)	23	6	0.64	+	9.44	0.000103	0.00687
negative regulation of metabolic process (GO:0009892)	2952	116	81.56	+	1.42	0.000106	0.00703
organonitrogen compound metabolic process (GO:1901564)	4787	173	132.26	+	1.31	0.000108	0.00714
tube formation (GO:0035148)	146	14	4.03	+	3.47	0.000111	0.00728
actin filament-based movement (GO:0030048)	93	11	2.57	+	4.28	0.000112	0.00732
cytoskeleton organization (GO:0007010)	1169	56	32.3	+	1.73	0.000114	0.0074
relaxation of cardiac muscle (GO:0055119)	14	5	0.39	+	12.93	0.000117	0.00759
response to reactive oxygen species (GO:0000302)	186	16	5.14	+	3.11	0.00012	0.00776
regulation of nitrogen compound metabolic process (GO:0051171)	5537	195	152.98	+	1.27	0.000128	0.00819
positive regulation of muscle cell differentiation (GO:0051149)	63	9	1.74	+	5.17	0.00013	0.0083
cardiac atrium development (GO:0003230)	36	7	0.99	+	7.04	0.000136	0.00862
response to peptide (GO:1901652)	450	28	12.43	+	2.25	0.000136	0.00864
primary neural tube formation (GO:0014020)	96	11	2.65	+	4.15	0.000145	0.00916
positive regulation of potassium ion import across plasma membrane (GO:1903288)	7	4	0.19	+	20.68	0.000147	0.00923
regulation of cardiac muscle cell membrane repolarization (GO:0099623)	25	6	0.69	+	8.69	0.000153	0.00952
response to cold (GO:0009409)	50	8	1.38	+	5.79	0.000153	0.00955
regulation of cell differentiation (GO:0045595)	1496	67	41.33	+	1.62	0.000166	0.0103
carbohydrate biosynthetic process (GO:0016051)	116	12	3.2	+	3.74	0.000178	0.0109
cardiac septum morphogenesis (GO:0060411)	66	9	1.82	+	4.94	0.000179	0.011
adaptive immune response (GO:0002250)	640	4	17.68	-	0.23	0.000177	0.011
response to organic cyclic compound (GO:0014070)	896	45	24.75	+	1.82	0.000182	0.0111
cardiac muscle cell action potential involved in contraction (GO:0086002)	38	7	1.05	+	6.67	0.000183	0.0111
skeletal muscle organ development (GO:0060538)	135	13	3.73	+	3.49	0.000186	0.0113
gland morphogenesis (GO:0022612)	99	11	2.74	+	4.02	0.000186	0.0113
positive regulation of catalytic activity (GO:0043085)	1134	54	31.33	+	1.72	0.000193	0.0116
cardiac myofibril assembly (GO:0055003)	16	5	0.44	+	11.31	0.000196	0.0117
positive regulation of sodium ion transmembrane transporter activity (GO:2000651)	16	5	0.44	+	11.31	0.000196	0.0118
fatty acid catabolic process (GO:0009062)	83	10	2.29	+	4.36	0.000199	0.0119
regulation of cysteine-type endopeptidase activity (GO:2000116)	237	18	6.55	+	2.75	0.0002	0.0119
negative regulation of nitrogen compound metabolic process (GO:0051172)	2380	96	65.75	+	1.46	0.000203	0.012
regulation of potassium ion import (GO:1903286)	8	4	0.22	+	18.1	0.000215	0.0126
small molecule metabolic process (GO:0044281)	1547	68	42.74	+	1.59	0.000215	0.0126
nucleoside diphosphate metabolic process (GO:0009132)	84	10	2.32	+	4.31	0.000218	0.0127
positive regulation of cellular process (GO:0048522)	5580	195	154.16	+	1.26	0.000232	0.0135
regulation of ketone biosynthetic process (GO:0010566)	17	5	0.47	+	10.65	0.000249	0.0144
response to hydrogen peroxide (GO:0042542)	121	12	3.34	+	3.59	0.000254	0.0147
sensory perception (GO:0007600)	978	10	27.02	-	0.37	0.00026	0.015
response to cadmium ion (GO:0046686)	70	9	1.93	+	4.65	0.000266	0.0152
vasculogenesis (GO:0001570)	70	9	1.93	+	4.65	0.000266	0.0153
neural tube formation (GO:0001841)	104	11	2.87	+	3.83	0.000275	0.0156
apoptotic process (GO:0006915)	905	45	25	+	1.8	0.000279	0.0158
negative regulation of cellular protein metabolic process (GO:0032269)	962	47	26.58	+	1.77	0.000285	0.016
negative regulation of phosphate metabolic process (GO:0045936)	423	26	11.69	+	2.22	0.000284	0.0161
negative regulation of phosphorus metabolic process (GO:0010563)	424	26	11.71	+	2.22	0.000291	0.0163
detection of stimulus (GO:0051606)	694	5	19.17	-	0.26	0.000294	0.0164
striated muscle atrophy (GO:0014891)	9	4	0.25	+	16.09	0.000305	0.017
regulation of myotube differentiation (GO:0010830)	42	7	1.16	+	6.03	0.000316	0.0175
negative regulation of biosynthetic process (GO:0009890)	1649	71	45.56	+	1.56	0.000319	0.0176
hexose metabolic process (GO:0019318)	144	13	3.98	+	3.27	0.000333	0.0184
chemical homeostasis (GO:0048878)	1113	52	30.75	+	1.69	0.000357	0.0196
gluconeogenesis (GO:0006094)	30	6	0.83	+	7.24	0.00036	0.0197
programmed cell death (GO:0012501)	942	46	26.03	+	1.77	0.000366	0.02
multicellular organismal process (GO:0032501)	6584	223	181.9	+	1.23	0.000378	0.0206
intracellular signal transduction (GO:0035556)	1464	64	40.45	+	1.58	0.000389	0.021
cellular component organization (GO:0016043)	5298	185	146.37	+	1.26	0.000388	0.0211
regulation of macromolecule metabolic process (GO:0060255)	6083	208	168.06	+	1.24	0.000401	0.0216
muscle atrophy (GO:0014889)	10	4	0.28	+	14.48	0.000417	0.0224
negative regulation of ion transport (GO:0043271)	148	13	4.09	+	3.18	0.000425	0.0225
mitochondrial membrane organization (GO:0007006)	110	11	3.04	+	3.62	0.000427	0.0225
negative regulation of MAPK cascade (GO:0043409)	168	14	4.64	+	3.02	0.000424	0.0225
cellular response to hormone stimulus (GO:0032870)	484	28	13.37	+	2.09	0.000423	0.0225
positive regulation of calcium ion transmembrane transport (GO:1904427)	75	9	2.07	+	4.34	0.000423	0.0226
gland development (GO:0048732)	414	25	11.44	+	2.19	0.000456	0.0239
negative regulation of protein serine/threonine kinase activity (GO:0071901)	111	11	3.07	+	3.59	0.000458	0.024
regulation of mitochondrial membrane permeability (GO:0046902)	60	8	1.66	+	4.83	0.000465	0.0243
positive regulation of biological process (GO:0048518)	6062	207	167.48	+	1.24	0.000471	0.0245
purine nucleotide metabolic process (GO:0006163)	320	21	8.84	+	2.38	0.000483	0.0251
epithelial tube formation (GO:0072175)	131	12	3.62	+	3.32	0.000495	0.0256
system process (GO:0003008)	2040	83	56.36	+	1.47	0.0005	0.0258
negative regulation of cellular biosynthetic process (GO:0031327)	1616	69	44.65	+	1.55	0.000511	0.0263
cellular component assembly (GO:0022607)	2251	90	62.19	+	1.45	0.00052	0.0266
negative regulation of catalytic activity (GO:0043086)	777	39	21.47	+	1.82	0.000544	0.0278
regulation of cell communication by electrical coupling involved in cardiac conduction (GO:1901844)	11	4	0.3	+	13.16	0.000557	0.0283
skeletal muscle tissue regeneration (GO:0043403)	33	6	0.91	+	6.58	0.000564	0.0285
regulation of hydrogen peroxide metabolic process (GO:0010310)	21	5	0.58	+	8.62	0.000568	0.0285
detection of chemical stimulus (GO:0009593)	524	3	14.48	-	0.21	0.000564	0.0286
regulation of hormone biosynthetic process (GO:0046885)	21	5	0.58	+	8.62	0.000568	0.0286
response to oxygen-containing compound (GO:1901700)	1567	67	43.29	+	1.55	0.000574	0.0287
lipid modification (GO:0030258)	174	14	4.81	+	2.91	0.000587	0.0293
regulation of cell migration (GO:0030334)	894	43	24.7	+	1.74	0.000608	0.0302
tissue regeneration (GO:0042246)	63	8	1.74	+	4.6	0.000624	0.0304
negative regulation of aldosterone metabolic process (GO:0032345)	4	3	0.11	+	27.15	0.000624	0.0305
negative regulation of aldosterone biosynthetic process (GO:0032348)	4	3	0.11	+	27.15	0.000624	0.0306
negative regulation of cortisol biosynthetic process (GO:2000065)	4	3	0.11	+	27.15	0.000624	0.0307
regulation of muscle filament sliding (GO:0032971)	4	3	0.11	+	27.15	0.000624	0.0307
negative regulation of protein metabolic process (GO:0051248)	1028	48	28.4	+	1.69	0.000638	0.0308
negative regulation of RNA metabolic process (GO:0051253)	1433	62	39.59	+	1.57	0.000636	0.0308
response to chemical (GO:0042221)	4055	146	112.03	+	1.3	0.000634	0.0308
regulation of sodium ion export across plasma membrane (GO:1903276)	4	3	0.11	+	27.15	0.000624	0.0308
positive regulation of sodium ion export across plasma membrane (GO:1903278)	4	3	0.11	+	27.15	0.000624	0.0309
non-membrane-bounded organelle assembly (GO:0140694)	303	20	8.37	+	2.39	0.000647	0.0311
regulation of cellular biosynthetic process (GO:0031326)	4088	147	112.94	+	1.3	0.000657	0.0315
negative regulation of ion transmembrane transport (GO:0034766)	98	10	2.71	+	3.69	0.000667	0.0319
negative regulation of phosphorylation (GO:0042326)	369	23	10.19	+	2.26	0.000675	0.0322
endocardial cushion formation (GO:0003272)	22	5	0.61	+	8.23	0.000682	0.0323
relaxation of muscle (GO:0090075)	22	5	0.61	+	8.23	0.000682	0.0324
cell death (GO:0008219)	978	46	27.02	+	1.7	0.000687	0.0324
regulation of phosphorus metabolic process (GO:0051174)	1379	60	38.1	+	1.57	0.000692	0.0324
regulation of phosphate metabolic process (GO:0019220)	1379	60	38.1	+	1.57	0.000692	0.0325
purine ribonucleotide metabolic process (GO:0009150)	306	20	8.45	+	2.37	0.000698	0.0327
response to inactivity (GO:0014854)	12	4	0.33	+	12.07	0.000727	0.0339
endocardial cushion morphogenesis (GO:0003203)	35	6	0.97	+	6.2	0.000743	0.0345
biological process involved in interspecies interaction between organisms (GO:0044419)	1519	22	41.97	-	0.52	0.000765	0.0355
response to other organism (GO:0051707)	1372	19	37.91	-	0.5	0.000789	0.0363
response to external biotic stimulus (GO:0043207)	1373	19	37.93	-	0.5	0.000788	0.0364
membrane repolarization (GO:0086009)	23	5	0.64	+	7.87	0.000812	0.0373
glucose metabolic process (GO:0006006)	101	10	2.79	+	3.58	0.000827	0.0379
cellular response to oxygen levels (GO:0071453)	160	13	4.42	+	2.94	0.000837	0.0382
negative regulation of growth (GO:0045926)	247	17	6.82	+	2.49	0.000847	0.0386
regulation of biosynthetic process (GO:0009889)	4152	148	114.71	+	1.29	0.000861	0.0391
regulation of skeletal muscle adaptation (GO:0014733)	13	4	0.36	+	11.14	0.000931	0.0418
cell development (GO:0048468)	1623	68	44.84	+	1.52	0.000934	0.0418
regulation of anatomical structure morphogenesis (GO:0022603)	908	43	25.09	+	1.71	0.000928	0.0419
fructose metabolic process (GO:0006000)	13	4	0.36	+	11.14	0.000931	0.0419
response to biotic stimulus (GO:0009607)	1418	20	39.18	-	0.51	0.000927	0.042
atrioventricular valve morphogenesis (GO:0003181)	24	5	0.66	+	7.54	0.00096	0.0429
regeneration (GO:0031099)	163	13	4.5	+	2.89	0.000981	0.0431
negative regulation of steroid hormone biosynthetic process (GO:0090032)	5	3	0.14	+	21.72	0.000979	0.0431
negative regulation of glucocorticoid metabolic process (GO:0031944)	5	3	0.14	+	21.72	0.000979	0.0432
negative regulation of glucocorticoid biosynthetic process (GO:0031947)	5	3	0.14	+	21.72	0.000979	0.0433
pyruvate transmembrane transport (GO:1901475)	5	3	0.14	+	21.72	0.000979	0.0434
positive regulation of delayed rectifier potassium channel activity (GO:1902261)	5	3	0.14	+	21.72	0.000979	0.0436
embryonic epithelial tube formation (GO:0001838)	123	11	3.4	+	3.24	0.00101	0.044
mitochondrial transport (GO:0006839)	207	15	5.72	+	2.62	0.00104	0.0453
cardiac conduction system development (GO:0003161)	38	6	1.05	+	5.72	0.00109	0.047
positive regulation of heart contraction (GO:0045823)	38	6	1.05	+	5.72	0.00109	0.0472
monosaccharide metabolic process (GO:0005996)	165	13	4.56	+	2.85	0.00109	0.0473
monocarboxylic acid catabolic process (GO:0072329)	105	10	2.9	+	3.45	0.00109	0.0473
positive regulation of calcium ion transport (GO:0051928)	125	11	3.45	+	3.19	0.00114	0.0489
negative regulation of signal transduction (GO:0009968)	1204	53	33.26	+	1.59	0.00114	0.049
fatty acid metabolic process (GO:0006631)	323	20	8.92	+	2.24	0.00115	0.0491
embryonic morphogenesis (GO:0048598)	568	30	15.69	+	1.91	0.00115	0.0491
sodium ion export across plasma membrane (GO:0036376)	14	4	0.39	+	10.34	0.00117	0.0496
ventricular septum development (GO:0003281)	70	8	1.93	+	4.14	0.00117	0.0498
regulation of high voltage-gated calcium channel activity (GO:1901841)	14	4	0.39	+	10.34	0.00117	0.0498
negative regulation of cell growth (GO:0030308)	188	14	5.19	+	2.7	0.00118	0.0498
ribonucleotide metabolic process (GO:0009259)	324	20	8.95	+	2.23	0.00118	0.0499

## Sheet: Kutools_Chart
#REF!
#REF!
#REF!
#REF!
#REF!
#REF!
#REF!
#REF!
#REF!
#REF!
#REF!
#REF!
#REF!
#REF!
#REF!
#REF!
#REF!
#REF!
#REF!
#REF!
#REF!
#REF!
#REF!
#REF!
#REF!
#REF!
#REF!
#REF!
#REF!
#REF!
#REF!
#REF!
#REF!
#REF!
#REF!
#REF!
#REF!
#REF!
#REF!
#REF!
#REF!
#REF!
#REF!
#REF!
#REF!
#REF!
#REF!
#REF!
#REF!
#REF!
#REF!
#REF!
#REF!
#REF!
#REF!
#REF!
#REF!
#REF!
#REF!
#REF!
#REF!
#REF!
#REF!
#REF!
#REF!
#REF!
#REF!
#REF!
#REF!
#REF!
#REF!
0
#REF!
#REF!
#REF!
#REF!
#REF!
#REF!
#REF!
#REF!
#REF!
#REF!
#REF!
#REF!
#REF!
#REF!
#REF!
#REF!
#REF!
#REF!
#REF!
#REF!
#REF!
#REF!
#REF!
#REF!
#REF!
#REF!
#REF!
#REF!
#REF!
#REF!
#REF!
#REF!
#REF!
#REF!
#REF!
#REF!
#REF!
#REF!
#REF!
#REF!
#REF!
#REF!
#REF!
#REF!
#REF!
#REF!
#REF!
#REF!
#REF!
#REF!
#REF!
#REF!
#REF!
#REF!
#REF!
#REF!
#REF!
#REF!
#REF!
#REF!
#REF!
#REF!
#REF!
#REF!
#REF!
#REF!
#REF!
#REF!
#REF!
#REF!
#REF!
0
#REF!
#REF!
#REF!
#REF!
#REF!
#REF!
#REF!
#REF!
#REF!
#REF!
#REF!
#REF!
#REF!
#REF!
#REF!
#REF!
#REF!
#REF!
#REF!
#REF!
#REF!
#REF!
#REF!
#REF!
#REF!
#REF!
#REF!
#REF!
#REF!
#REF!
#REF!
#REF!
#REF!
#REF!
#REF!
#REF!
#REF!
#REF!
#REF!
#REF!
#REF!
#REF!
#REF!
#REF!
#REF!
#REF!
#REF!
#REF!
#REF!
#REF!
#REF!
#REF!
#REF!
#REF!
#REF!
#REF!
#REF!
#REF!
#REF!
#REF!
#REF!
#REF!
#REF!
#REF!
#REF!
#REF!
#REF!
#REF!
#REF!
#REF!
#REF!
0
#REF!
#REF!
#REF!
#REF!
#REF!
#REF!
#REF!
#REF!
#REF!
#REF!
#REF!
#REF!
#REF!
#REF!
#REF!
#REF!
#REF!
#REF!
#REF!
#REF!
#REF!
#REF!
#REF!
#REF!
#REF!
#REF!
#REF!
#REF!
#REF!
#REF!
#REF!
#REF!
#REF!
#REF!
#REF!
#REF!
#REF!
#REF!
#REF!
#REF!
#REF!
#REF!
#REF!
#REF!
#REF!
#REF!
#REF!
#REF!
#REF!
#REF!
#REF!
#REF!
#REF!
#REF!
#REF!
#REF!
#REF!
#REF!
#REF!
#REF!
#REF!
#REF!
#REF!
#REF!
#REF!
#REF!
#REF!
#REF!
#REF!
#REF!
#REF!
0
#REF!
#REF!
#REF!
#REF!
#REF!
#REF!
#REF!
#REF!
#REF!
#REF!
#REF!
#REF!
#REF!
#REF!
#REF!
#REF!
#REF!
#REF!
#REF!
#REF!
#REF!
#REF!
#REF!
#REF!
#REF!
#REF!
#REF!
#REF!
#REF!
#REF!
#REF!
#REF!
#REF!
#REF!
#REF!
#REF!
#REF!
#REF!
#REF!
#REF!
#REF!
#REF!
#REF!
#REF!
#REF!
#REF!
#REF!
#REF!
#REF!
#REF!
#REF!
#REF!
#REF!
#REF!
#REF!
#REF!
#REF!
#REF!
#REF!
#REF!
#REF!
#REF!
#REF!
#REF!
#REF!
#REF!
#REF!
#REF!
#REF!
#REF!
#REF!
0
#REF!
#REF!
#REF!
#REF!
#REF!
#REF!
#REF!
#REF!
#REF!
#REF!
#REF!
#REF!
#REF!
#REF!
#REF!
#REF!
#REF!
#REF!
#REF!
#REF!
#REF!
#REF!
#REF!
#REF!
#REF!
#REF!
#REF!
#REF!
#REF!
#REF!
#REF!
#REF!
#REF!
#REF!
#REF!
#REF!
#REF!
#REF!
#REF!
#REF!
#REF!
#REF!
#REF!
#REF!
#REF!
#REF!
#REF!
#REF!
#REF!
#REF!
#REF!
#REF!
#REF!
#REF!
#REF!
#REF!
#REF!
#REF!
#REF!
#REF!
#REF!
#REF!
#REF!
#REF!
#REF!
#REF!
#REF!
#REF!
#REF!
#REF!
#REF!
0
#REF!
#REF!
#REF!
#REF!
#REF!
#REF!
#REF!
#REF!
#REF!
#REF!
#REF!
#REF!
#REF!
#REF!
#REF!
#REF!
#REF!
#REF!
#REF!
#REF!
#REF!
#REF!
#REF!
#REF!
#REF!
#REF!
#REF!
#REF!
#REF!
#REF!
#REF!
#REF!
#REF!
#REF!
#REF!
#REF!
#REF!
#REF!
#REF!
#REF!
#REF!
#REF!
#REF!
#REF!
#REF!
#REF!
#REF!
#REF!
#REF!
#REF!
#REF!
#REF!
#REF!
#REF!
#REF!
#REF!
#REF!
#REF!
#REF!
#REF!
#REF!
#REF!
#REF!
#REF!
#REF!
#REF!
#REF!
#REF!
#REF!
#REF!
#REF!
0
#REF!
#REF!
#REF!
#REF!
#REF!
#REF!
#REF!
#REF!
#REF!
#REF!
#REF!
#REF!
#REF!
#REF!
#REF!
#REF!
#REF!
#REF!
#REF!
#REF!
#REF!
#REF!
#REF!
#REF!
#REF!
#REF!
#REF!
#REF!
#REF!
#REF!
#REF!
#REF!
#REF!
#REF!
#REF!
#REF!
#REF!
#REF!
#REF!
#REF!
#REF!
#REF!
#REF!
#REF!
#REF!
#REF!
#REF!
#REF!
#REF!
#REF!
#REF!
#REF!
#REF!
#REF!
#REF!
#REF!
#REF!
#REF!
#REF!
#REF!
#REF!
#REF!
#REF!
#REF!
#REF!
#REF!
#REF!
#REF!
#REF!
#REF!
#REF!
0
#REF!
#REF!
#REF!
#REF!
#REF!
#REF!
#REF!
#REF!
#REF!
#REF!
#REF!
#REF!
#REF!
#REF!
#REF!
#REF!
#REF!
#REF!
#REF!
#REF!
#REF!
#REF!
#REF!
#REF!
#REF!
#REF!
#REF!
#REF!
#REF!
#REF!
#REF!
#REF!
#REF!
#REF!
#REF!
#REF!
#REF!
#REF!
#REF!
#REF!
#REF!
#REF!
#REF!
#REF!
#REF!
#REF!
#REF!
#REF!
#REF!
#REF!
#REF!
#REF!
#REF!
#REF!
#REF!
#REF!
#REF!
#REF!
#REF!
#REF!
#REF!
#REF!
#REF!
#REF!
#REF!
#REF!
#REF!
#REF!
#REF!
#REF!
#REF!
0
#REF!
#REF!
#REF!
#REF!
#REF!
#REF!
#REF!
#REF!
#REF!
#REF!
#REF!
#REF!
#REF!
#REF!
#REF!
#REF!
#REF!
#REF!
#REF!
#REF!
#REF!
#REF!
#REF!
#REF!
#REF!
#REF!
#REF!
#REF!
#REF!
#REF!
#REF!
#REF!
#REF!
#REF!
#REF!
#REF!
#REF!
#REF!
#REF!
#REF!
#REF!
#REF!
#REF!
#REF!
#REF!
#REF!
#REF!
#REF!
#REF!
#REF!
#REF!
#REF!
#REF!
#REF!
#REF!
#REF!
#REF!
#REF!
#REF!
#REF!
#REF!
#REF!
#REF!
#REF!
#REF!
#REF!
#REF!
#REF!
#REF!
#REF!
#REF!
0
#REF!
#REF!
#REF!
#REF!
#REF!
#REF!
#REF!
#REF!
#REF!
#REF!
#REF!
#REF!
#REF!
#REF!
#REF!
#REF!
#REF!
#REF!
#REF!
#REF!
#REF!
#REF!
#REF!
#REF!
#REF!
#REF!
#REF!
#REF!
#REF!
#REF!
#REF!
#REF!
#REF!
#REF!
#REF!
#REF!
#REF!
#REF!
#REF!
#REF!
#REF!
#REF!
#REF!
#REF!
#REF!
#REF!
#REF!
#REF!
#REF!
#REF!
#REF!
#REF!
#REF!
#REF!
#REF!
#REF!
#REF!
#REF!
#REF!
#REF!
#REF!
#REF!
#REF!
#REF!
#REF!
#REF!
#REF!
#REF!
#REF!
#REF!
#REF!
0
#REF!
#REF!
#REF!
#REF!
#REF!
#REF!
#REF!
#REF!
#REF!
#REF!
#REF!
#REF!
#REF!
#REF!
#REF!
#REF!
#REF!
#REF!
#REF!
#REF!
#REF!
#REF!
#REF!
#REF!
#REF!
#REF!
#REF!
#REF!
#REF!
#REF!
#REF!
#REF!
#REF!
#REF!
#REF!
#REF!
#REF!
#REF!
#REF!
#REF!
#REF!
#REF!
#REF!
#REF!
#REF!
#REF!
#REF!
#REF!
#REF!
#REF!
#REF!
#REF!
#REF!
#REF!
#REF!
#REF!
#REF!
#REF!
#REF!
#REF!
#REF!
#REF!
#REF!
#REF!
#REF!
#REF!
#REF!
#REF!
#REF!
#REF!
#REF!
0
#REF!
#REF!
#REF!
#REF!
#REF!
#REF!
#REF!
#REF!
#REF!
#REF!
#REF!
#REF!
#REF!
#REF!
#REF!
#REF!
#REF!
#REF!
#REF!
#REF!
#REF!
#REF!
#REF!
#REF!
#REF!
#REF!
#REF!
#REF!
#REF!
#REF!
#REF!
#REF!
#REF!
#REF!
#REF!
#REF!
#REF!
#REF!
#REF!
#REF!
#REF!
#REF!
#REF!
#REF!
#REF!
#REF!
#REF!
#REF!
#REF!
#REF!
#REF!
#REF!
#REF!
#REF!
#REF!
#REF!
#REF!
#REF!
#REF!
#REF!
#REF!
#REF!
#REF!
#REF!
#REF!
#REF!
#REF!
#REF!
#REF!
#REF!
#REF!
0
#REF!
#REF!
#REF!
#REF!
#REF!
#REF!
#REF!
#REF!
#REF!
#REF!
#REF!
#REF!
#REF!
#REF!
#REF!
#REF!
#REF!
#REF!
#REF!
#REF!
#REF!
#REF!
#REF!
#REF!
#REF!
#REF!
#REF!
#REF!
#REF!
#REF!
#REF!
#REF!
#REF!
#REF!
#REF!
#REF!
#REF!
#REF!
#REF!
#REF!
#REF!
#REF!
#REF!
#REF!
#REF!
#REF!
#REF!
#REF!
#REF!
#REF!
#REF!
#REF!
#REF!
#REF!
#REF!
#REF!
#REF!
#REF!
#REF!
#REF!
#REF!
#REF!
#REF!
#REF!
#REF!
#REF!
#REF!
#REF!
#REF!
#REF!
#REF!
0
#REF!
#REF!
#REF!
#REF!
#REF!
#REF!
#REF!
#REF!
#REF!
#REF!
#REF!
#REF!
#REF!
#REF!
#REF!
#REF!
#REF!
#REF!
#REF!
#REF!
#REF!
#REF!
#REF!
#REF!
#REF!
#REF!
#REF!
#REF!
#REF!
#REF!
#REF!
#REF!
#REF!
#REF!
#REF!
#REF!
#REF!
#REF!
#REF!
#REF!
#REF!
#REF!
#REF!
#REF!
#REF!
#REF!
#REF!
#REF!
#REF!
#REF!
#REF!
#REF!
#REF!
#REF!
#REF!
#REF!
#REF!
#REF!
#REF!
#REF!
#REF!
#REF!
#REF!
#REF!
#REF!
#REF!
#REF!
#REF!
#REF!
#REF!
#REF!
0
#REF!
#REF!
#REF!
#REF!
#REF!
#REF!
#REF!
#REF!
#REF!
#REF!
#REF!
#REF!
#REF!
#REF!
#REF!
#REF!
#REF!
#REF!
#REF!
#REF!
#REF!
#REF!
#REF!
#REF!
#REF!
#REF!
#REF!
#REF!
#REF!
#REF!
#REF!
#REF!
#REF!
#REF!
#REF!
#REF!
#REF!
#REF!
#REF!
#REF!
#REF!
#REF!
#REF!
#REF!
#REF!
#REF!
#REF!
#REF!
#REF!
#REF!
#REF!
#REF!
#REF!
#REF!
#REF!
#REF!
#REF!
#REF!
#REF!
#REF!
#REF!
#REF!
#REF!
#REF!
#REF!
#REF!
#REF!
#REF!
#REF!
#REF!
#REF!
0
#REF!
#REF!
#REF!
#REF!
#REF!
#REF!
#REF!
#REF!
#REF!
#REF!
#REF!
#REF!
#REF!
#REF!
#REF!
#REF!
#REF!
#REF!
#REF!
#REF!
#REF!
#REF!
#REF!
#REF!
#REF!
#REF!
#REF!
#REF!
#REF!
#REF!
#REF!
#REF!
#REF!
#REF!
#REF!
#REF!
#REF!
#REF!
#REF!
#REF!
#REF!
#REF!
#REF!
#REF!
#REF!
#REF!
#REF!
#REF!
#REF!
#REF!
#REF!
#REF!
#REF!
#REF!
#REF!
#REF!
#REF!
#REF!
#REF!
#REF!
#REF!
#REF!
#REF!
#REF!
#REF!
#REF!
#REF!
#REF!
#REF!
#REF!
#REF!
0
#REF!
#REF!
#REF!
#REF!
#REF!
#REF!
#REF!
#REF!
#REF!
#REF!
#REF!
#REF!
#REF!
#REF!
#REF!
#REF!
#REF!
#REF!
#REF!
#REF!
#REF!
#REF!
#REF!
#REF!
#REF!
#REF!
#REF!
#REF!
#REF!
#REF!
#REF!
#REF!
#REF!
#REF!
#REF!
#REF!
#REF!
#REF!
#REF!
#REF!
#REF!
#REF!
#REF!
#REF!
#REF!
#REF!
#REF!
#REF!
#REF!
#REF!
#REF!
#REF!
#REF!
#REF!
#REF!
#REF!
#REF!
#REF!
#REF!
#REF!
#REF!
#REF!
#REF!
#REF!
#REF!
#REF!
#REF!
#REF!
#REF!
#REF!
#REF!
0
#REF!
#REF!
#REF!
#REF!
#REF!
#REF!
#REF!
#REF!
#REF!
#REF!
#REF!
#REF!
#REF!
#REF!
#REF!
#REF!
#REF!
#REF!
#REF!
#REF!
#REF!
#REF!
#REF!
#REF!
#REF!
#REF!
#REF!
#REF!
#REF!
#REF!
#REF!
#REF!
#REF!
#REF!
#REF!
#REF!
#REF!
#REF!
#REF!
#REF!
#REF!
#REF!
#REF!
#REF!
#REF!
#REF!
#REF!
#REF!
#REF!
#REF!
#REF!
#REF!
#REF!
#REF!
#REF!
#REF!
#REF!
#REF!
#REF!
#REF!
#REF!
#REF!
#REF!
#REF!
#REF!
#REF!
#REF!
#REF!
#REF!
#REF!
#REF!
0
#REF!
#REF!
#REF!
#REF!
#REF!
#REF!
#REF!
#REF!
#REF!
#REF!
#REF!
#REF!
#REF!
#REF!
#REF!
#REF!
#REF!
#REF!
#REF!
#REF!
#REF!
#REF!
#REF!
#REF!
#REF!
#REF!
#REF!
#REF!
#REF!
#REF!
#REF!
#REF!
#REF!
#REF!
#REF!
#REF!
#REF!
#REF!
#REF!
#REF!
#REF!
#REF!
#REF!
#REF!
#REF!
#REF!
#REF!
#REF!
#REF!
#REF!
#REF!
#REF!
#REF!
#REF!
#REF!
#REF!
#REF!
#REF!
#REF!
#REF!
#REF!
#REF!
#REF!
#REF!
#REF!
#REF!
#REF!
#REF!
#REF!
#REF!
#REF!
0
#REF!
#REF!
#REF!
#REF!
#REF!
#REF!
#REF!
#REF!
#REF!
#REF!
#REF!
#REF!
#REF!
#REF!
#REF!
#REF!
#REF!
#REF!
#REF!
#REF!
#REF!
#REF!
#REF!
#REF!
#REF!
#REF!
#REF!
#REF!
#REF!
#REF!
#REF!
#REF!
#REF!
#REF!
#REF!
#REF!
#REF!
#REF!
#REF!
#REF!
#REF!
#REF!
#REF!
#REF!
#REF!
#REF!
#REF!
#REF!
#REF!
#REF!
#REF!
#REF!
#REF!
#REF!
#REF!
#REF!
#REF!
#REF!
#REF!
#REF!
#REF!
#REF!
#REF!
#REF!
#REF!
#REF!
#REF!
#REF!
#REF!
#REF!
#REF!
0
#REF!
#REF!
#REF!
#REF!
#REF!
#REF!
#REF!
#REF!
#REF!
#REF!
#REF!
#REF!
#REF!
#REF!
#REF!
#REF!
#REF!
#REF!
#REF!
#REF!
#REF!
#REF!
#REF!
#REF!
#REF!
#REF!
#REF!
#REF!
#REF!
#REF!
#REF!
#REF!
#REF!
#REF!
#REF!
#REF!
#REF!
#REF!
#REF!
#REF!
#REF!
#REF!
#REF!
#REF!
#REF!
#REF!
#REF!
#REF!
#REF!
#REF!
#REF!
#REF!
#REF!
#REF!
#REF!
#REF!
#REF!
#REF!
#REF!
#REF!
#REF!
#REF!
#REF!
#REF!
#REF!
#REF!
#REF!
#REF!
#REF!
#REF!
#REF!
0
#REF!
#REF!
#REF!
#REF!
#REF!
#REF!
#REF!
#REF!
#REF!
#REF!
#REF!
#REF!
#REF!
#REF!
#REF!
#REF!
#REF!
#REF!
#REF!
#REF!
#REF!
#REF!
#REF!
#REF!
#REF!
#REF!
#REF!
#REF!
#REF!
#REF!
#REF!
#REF!
#REF!
#REF!
#REF!
#REF!
#REF!
#REF!
#REF!
#REF!
#REF!
#REF!
#REF!
#REF!
#REF!
#REF!
#REF!
#REF!
#REF!
#REF!
#REF!
#REF!
#REF!
#REF!
#REF!
#REF!
#REF!
#REF!
#REF!
#REF!
#REF!
#REF!
#REF!
#REF!
#REF!
#REF!
#REF!
#REF!
#REF!
#REF!
#REF!
0
#REF!
#REF!
#REF!
#REF!
#REF!
#REF!
#REF!
#REF!
#REF!
#REF!
#REF!
#REF!
#REF!
#REF!
#REF!
#REF!
#REF!
#REF!
#REF!
#REF!
#REF!
#REF!
#REF!
#REF!
#REF!
#REF!
#REF!
#REF!
#REF!
#REF!
#REF!
#REF!
#REF!
#REF!
#REF!
#REF!
#REF!
#REF!
#REF!
#REF!
#REF!
#REF!
#REF!
#REF!
#REF!
#REF!
#REF!
#REF!
#REF!
#REF!
#REF!
#REF!
#REF!
#REF!
#REF!
#REF!
#REF!
#REF!
#REF!
#REF!
#REF!
#REF!
#REF!
#REF!
#REF!
#REF!
#REF!
#REF!
#REF!
#REF!
#REF!
0
#REF!
#REF!
#REF!
#REF!
#REF!
#REF!
#REF!
#REF!
#REF!
#REF!
#REF!
#REF!
#REF!
#REF!
#REF!
#REF!
#REF!
#REF!
#REF!
#REF!
#REF!
#REF!
#REF!
#REF!
#REF!
#REF!
#REF!
#REF!
#REF!
#REF!
#REF!
#REF!
#REF!
#REF!
#REF!
#REF!
#REF!
#REF!
#REF!
#REF!
#REF!
#REF!
#REF!
#REF!
#REF!
#REF!
#REF!
#REF!
#REF!
#REF!
#REF!
#REF!
#REF!
#REF!
#REF!
#REF!
#REF!
#REF!
#REF!
#REF!
#REF!
#REF!
#REF!
#REF!
#REF!
#REF!
#REF!
#REF!
#REF!
#REF!
#REF!
0
#REF!
#REF!
#REF!
#REF!
#REF!
#REF!
#REF!
#REF!
#REF!
#REF!
#REF!
#REF!
#REF!
#REF!
#REF!	#REF!
	#REF!
	#REF!
	#REF!
	#REF!
	#REF!
	#REF!
	#REF!
	#REF!
	#REF!
	#REF!
	#REF!
	#REF!
	#REF!
	#REF!	#REF!
		#REF!
		#REF!
		#REF!
		#REF!
		#REF!
		#REF!
		#REF!
		#REF!
		#REF!
		#REF!
		#REF!
		#REF!
		#REF!
		#REF!	#REF!
			#REF!
			#REF!
			#REF!
			#REF!
			#REF!
			#REF!
			#REF!
			#REF!
			#REF!
			#REF!
			#REF!
			#REF!
			#REF!
			#REF!	#REF!
				#REF!
				#REF!
				#REF!
				#REF!
				#REF!
				#REF!
				#REF!
				#REF!
				#REF!
				#REF!
				#REF!
				#REF!
				#REF!
				#REF!	#REF!
					#REF!
					#REF!
					#REF!
					#REF!
					#REF!
					#REF!
					#REF!
					#REF!
					#REF!
					#REF!
					#REF!
					#REF!
					#REF!
					#REF!	#REF!
						#REF!
						#REF!
						#REF!
						#REF!
						#REF!
						#REF!
						#REF!
						#REF!
						#REF!
						#REF!
						#REF!
						#REF!
						#REF!
						#REF!	#REF!
							#REF!
							#REF!
							#REF!
							#REF!
							#REF!
							#REF!
							#REF!
							#REF!
							#REF!
							#REF!
							#REF!
							#REF!
							#REF!
							#REF!	#REF!
								#REF!
								#REF!
								#REF!
								#REF!
								#REF!
								#REF!
								#REF!
								#REF!
								#REF!
								#REF!
								#REF!
								#REF!
								#REF!
								#REF!	#REF!
									#REF!
									#REF!
									#REF!
									#REF!
									#REF!
									#REF!
									#REF!
									#REF!
									#REF!
									#REF!
									#REF!
									#REF!
									#REF!
									#REF!	#REF!
										#REF!
										#REF!
										#REF!
										#REF!
										#REF!
										#REF!
										#REF!
										#REF!
										#REF!
										#REF!
										#REF!
										#REF!
										#REF!
										#REF!	#REF!
											#REF!
											#REF!
											#REF!
											#REF!
											#REF!
											#REF!
											#REF!
											#REF!
											#REF!
											#REF!
											#REF!
											#REF!
											#REF!
											#REF!	#REF!
												#REF!
												#REF!
												#REF!
												#REF!
												#REF!
												#REF!
												#REF!
												#REF!
												#REF!
												#REF!
												#REF!
												#REF!
												#REF!
												#REF!	#REF!
													#REF!
													#REF!
													#REF!
													#REF!
													#REF!
													#REF!
													#REF!
													#REF!
													#REF!
													#REF!
													#REF!
													#REF!
													#REF!
													#REF!	#REF!
														#REF!
														#REF!
														#REF!
[truncated: 6,453 more rows]
[truncated: 10 more columns]
