# Supplementary material for: A single cell transcriptional roadmap of human pacemaker cell differentiation
Source: eLife. 2022 Oct 11;11:e76781. doi: 10.7554/eLife.76781 (PMC9553210; doi:10.7554/eLife.76781)
Supplement: Supplementary file 5. — Related to Figure 7. [file elife-76781-supp5.xlsx]

## Sheet: cluster0
	p_val	avg_log2FC	pct.1	pct.2	p_val_adj
TRH	4.01363e-74	1.29443	0.917	0.474	7.28594e-70		as shown in Figure 7
NKX2-5	1.53726e-71	0.999918	0.874	0.401	2.79059e-67
VWDE	1.50349e-69	1.03837	0.942	0.514	2.72928e-65
NREP	5.14156e-69	0.901113	1	0.961	9.33347e-65
MB	1.48993e-66	1.40185	0.887	0.49	2.70467e-62
MYH6	4.09507e-61	1.15964	1	0.74	7.43378e-57
CKM	7.17179e-59	1.20339	0.933	0.614	1.3019e-54
HAMP	1.3234e-57	1.03934	0.546	0.16	2.40237e-53
LRRC10	6.67118e-57	0.831327	0.874	0.435	1.21102e-52
WNT2	7.68412e-57	0.530484	0.34	0.049	1.3949e-52
MT-ND1	1.01287e-54	0.435762	1	1	1.83866e-50
MT-ND4	2.56655e-52	0.45917	1	1	4.65906e-48
MT-CO3	9.92078e-52	0.486772	1	1	1.80092e-47
TNNC1	7.70426e-49	0.900387	0.975	0.753	1.39855e-44
CFC1	7.5988e-48	0.560336	0.377	0.081	1.37941e-43
MT-ND2	1.95286e-45	0.462614	1	1	3.54503e-41
NR2F2	6.56416e-45	0.856514	0.982	0.833	1.19159e-40
TMOD1	1.30986e-44	0.619062	0.847	0.498	2.3778e-40
ALDOC	1.65989e-44	0.715229	0.761	0.433	3.0132e-40
NPPA	2.75448e-44	1.72418	0.675	0.335	5.0002e-40
WNK2	2.12587e-43	0.627607	0.779	0.405	3.85909e-39
ADAMTS19	2.28291e-43	0.74568	0.672	0.313	4.14417e-39
ANGPT1	3.09495e-43	0.896796	0.607	0.243	5.61826e-39
LDB3	3.11895e-43	0.764557	0.982	0.655	5.66183e-39
TRDN	1.8946e-42	0.728385	0.972	0.634	3.43927e-38
DOK4	2.234e-41	0.857002	0.948	0.77	4.05538e-37
CPNE5	8.19763e-41	0.668889	0.647	0.297	1.48812e-36
CACNA1D	4.45312e-40	0.568318	0.69	0.322	8.08374e-36
CHCHD10	2.33444e-39	0.615914	0.969	0.742	4.23771e-35
TNNI1	3.45472e-39	0.615959	1	0.958	6.27136e-35
MT-CO1	4.07901e-39	0.561422	1	1	7.40463e-35
MT-ATP6	1.28188e-37	0.347684	1	1	2.32699e-33
MT-RNR1	2.37968e-37	0.590921	1	0.999	4.31984e-33
SMYD1	5.28755e-37	0.584883	0.942	0.657	9.59848e-33
ACTN2	1.03145e-36	0.658441	0.991	0.752	1.8724e-32
MT-ND3	3.71089e-36	0.3979	1	1	6.73638e-32
MYL7	4.17456e-36	0.748031	1	0.973	7.57809e-32
MT-CO2	8.44284e-36	0.389392	1	1	1.53263e-31
ARHGAP31	8.84229e-36	0.570468	0.782	0.493	1.60514e-31
ADPRHL1	5.80537e-35	0.538003	0.899	0.541	1.05385e-30
TCEA3	1.21326e-34	0.516243	0.85	0.494	2.20244e-30
TECRL	1.2619e-33	0.629738	1	0.838	2.29073e-29
ADM	2.44615e-33	0.647131	0.518	0.217	4.4405e-29
RABGAP1L	3.24378e-33	0.631736	0.807	0.569	5.88843e-29
DES	4.13387e-33	0.793231	0.767	0.466	7.50421e-29
KCNIP2	4.39045e-33	0.738494	0.761	0.446	7.96998e-29
SHD	1.15239e-32	0.511699	0.847	0.506	2.09194e-28
CRIP2	1.90508e-32	0.566225	0.979	0.843	3.45829e-28
PDHA1	2.23819e-32	0.56639	0.954	0.811	4.06299e-28
OTOGL	2.60627e-32	0.266094	0.31	0.077	4.73116e-28
RCAN2	3.00546e-32	0.521068	0.794	0.446	5.4558e-28
PGM5	4.80424e-32	0.451211	0.577	0.26	8.72114e-28
MDH1	6.96668e-32	0.538963	0.997	0.909	1.26466e-27
NEBL	7.97059e-32	0.613327	0.994	0.784	1.4469e-27
MT-CYB	2.92795e-31	0.321248	1	1	5.3151e-27
MYL4	7.60861e-31	0.609275	0.994	0.76	1.38119e-26
MYL3	1.54145e-30	0.938091	0.73	0.456	2.79819e-26
TNNT2	1.72824e-30	0.63624	1	0.978	3.13728e-26
CACNA1C	2.14524e-30	0.474428	0.706	0.377	3.89425e-26
PRKAG2	1.78449e-29	0.457269	0.773	0.502	3.23938e-25
FHL2	3.6586e-29	0.64188	0.84	0.599	6.64146e-25
ACTC1	4.43276e-29	0.492173	1	1	8.04678e-25
ATP2A2	4.83922e-29	0.488324	1	0.95	8.78463e-25
GPX3	5.40686e-29	0.472481	0.546	0.268	9.81508e-25
CITED4	2.74729e-28	0.528043	0.727	0.44	4.98715e-24
ALDOA	3.18862e-28	0.495595	0.988	0.943	5.7883e-24
TRIM55	5.21574e-28	0.485349	0.834	0.559	9.46814e-24
XIRP1	2.48654e-27	0.503348	0.773	0.469	4.51382e-23
AHNAK2	2.51001e-27	0.454002	0.393	0.142	4.55642e-23
NRXN1	3.73706e-27	0.468149	0.669	0.338	6.78389e-23
MYOCD	5.22962e-27	0.459669	0.804	0.504	9.49333e-23
PLN	5.62071e-27	0.469536	0.991	0.76	1.02033e-22
SLC25A4	6.78877e-27	0.493776	0.991	0.866	1.23237e-22
TPI1	8.09738e-27	0.449867	1	0.962	1.46992e-22
ATP5B	1.00536e-26	0.416663	0.997	0.983	1.82503e-22
RXRG	1.13706e-26	0.435846	0.442	0.187	2.06411e-22
RASSF8	1.158e-26	0.533826	0.696	0.463	2.10211e-22
HADHB	1.22876e-26	0.50651	0.954	0.831	2.23057e-22
MT-RNR2	1.56422e-26	0.478631	1	1	2.83954e-22
CADPS	2.63109e-26	0.460693	0.663	0.364	4.77621e-22
KCNH2	2.8002e-26	0.393104	0.767	0.47	5.0832e-22
RYR2	2.88694e-26	0.528616	0.963	0.773	5.24067e-22
FAM162A	1.02813e-25	0.489327	0.908	0.731	1.86636e-21
NFYB	1.33846e-25	0.491329	0.727	0.502	2.4297e-21
UNC45B	2.38585e-25	0.463943	0.917	0.602	4.33103e-21
TTN	3.5598e-25	0.55206	1	0.977	6.4621e-21
PTP4A3	6.35249e-25	0.461455	0.856	0.609	1.15317e-20
MDH2	6.50173e-25	0.406331	0.96	0.829	1.18026e-20
PDK1	7.22217e-25	0.464499	0.948	0.687	1.31104e-20
ATP1A2	1.5129e-24	0.456334	0.675	0.391	2.74638e-20
ALPK2	3.70813e-24	0.481112	0.908	0.682	6.73136e-20
LDHA	4.59569e-24	0.470602	0.991	0.936	8.34256e-20
ADD3	6.20159e-24	0.522857	0.948	0.859	1.12577e-19
ITGB1BP2	7.04442e-24	0.391556	0.709	0.408	1.27877e-19
ADAM11	1.06631e-23	0.387223	0.571	0.3	1.93567e-19
ATP1A1	1.35184e-23	0.41974	0.939	0.808	2.454e-19
GPI	1.48116e-23	0.42111	0.975	0.882	2.68875e-19
TBX5	1.55148e-23	0.434334	0.929	0.689	2.8164e-19
RBM38	1.86889e-23	0.495987	0.856	0.649	3.39259e-19
COL2A1	1.87206e-23	0.690214	0.929	0.823	3.39834e-19
ANXA6	4.32693e-23	0.455851	0.972	0.858	7.85468e-19
HSPB7	6.89987e-23	0.481755	0.982	0.881	1.25253e-18
SPEG	9.51107e-23	0.529886	0.896	0.763	1.72654e-18
CCNB1IP1	1.07273e-22	0.434358	0.893	0.797	1.94732e-18
FAM189A2	1.30499e-22	0.373987	0.782	0.483	2.36895e-18
SH3KBP1	1.37009e-22	0.506196	0.791	0.555	2.48713e-18
FAR2P2	1.97087e-22	0.394743	0.429	0.193	3.57772e-18
DENND5B	3.56972e-22	0.456877	0.847	0.675	6.48012e-18
CPE	7.51365e-22	0.490953	0.89	0.737	1.36395e-17
QKI	1.02657e-21	0.39424	0.994	0.93	1.86354e-17
PDE4DIP	1.71259e-21	0.41087	0.856	0.614	3.10887e-17
GOT1	2.10207e-21	0.449161	0.914	0.73	3.81589e-17
LAMA2	2.13293e-21	0.423159	0.862	0.592	3.87191e-17
PPP1R14C	2.16742e-21	0.361959	0.613	0.343	3.93451e-17
FITM1	2.96676e-21	0.366776	0.837	0.531	5.38557e-17
SCD	3.41509e-21	0.50465	0.933	0.822	6.19942e-17
MSX2	3.42916e-21	0.450393	0.488	0.243	6.22495e-17
GFPT2	3.53864e-21	0.335316	0.411	0.18	6.42369e-17
MYBPC3	4.34472e-21	0.408772	0.948	0.629	7.88697e-17
ADCY5	6.90012e-21	0.40179	0.528	0.273	1.25258e-16
MT-ND5	6.96875e-21	0.35705	1	1	1.26504e-16
MYL9	8.40934e-21	0.38057	1	0.974	1.52655e-16
FSD2	9.05698e-21	0.266645	0.35	0.139	1.64411e-16
PKM	1.24173e-20	0.32064	1	0.981	2.25411e-16
GNG11	1.36853e-20	0.415928	0.521	0.276	2.48429e-16
MTRNR2L1	1.63086e-20	0.416417	0.945	0.825	2.9605e-16
ENO3	2.93743e-20	0.382091	0.899	0.602	5.33232e-16
RASSF5	2.95485e-20	0.387544	0.745	0.471	5.36394e-16
SLC8A1	2.99767e-20	0.400314	0.988	0.796	5.44167e-16
NRTN	6.74923e-20	0.36869	0.678	0.418	1.22519e-15
CAPN3	1.0102e-19	0.324187	0.675	0.41	1.83381e-15
POPDC3	1.42505e-19	0.41776	0.681	0.421	2.5869e-15
PRDX2	5.09303e-19	0.346731	0.972	0.901	9.24538e-15
FXYD1	6.1411e-19	0.333985	0.709	0.448	1.11479e-14
MYOM1	6.43641e-19	0.382025	0.966	0.692	1.1684e-14
HIF3A	7.24385e-19	0.409603	0.865	0.698	1.31498e-14
CS	7.93713e-19	0.36302	0.963	0.895	1.44083e-14
TESC	8.99315e-19	0.295087	0.629	0.357	1.63253e-14
FBXO40	1.16209e-18	0.305793	0.405	0.192	2.10955e-14
ATP5G3	1.19888e-18	0.281314	1	0.984	2.17633e-14
ATP5A1	1.45282e-18	0.302406	0.997	0.981	2.63731e-14
PDGFRA	2.46147e-18	0.387273	0.77	0.526	4.4683e-14
SMPX	3.58397e-18	0.333348	0.911	0.628	6.50597e-14
MYO18B	3.82119e-18	0.331869	0.718	0.456	6.9366e-14
ASB2	4.13878e-18	0.322812	0.515	0.275	7.51312e-14
EEF1A2	7.93007e-18	0.358353	0.874	0.615	1.43955e-13
SEMA4B	1.15481e-17	0.360118	0.644	0.434	2.09633e-13
PPP1R12B	1.23567e-17	0.385238	0.957	0.751	2.24312e-13
RRAD	1.50279e-17	0.268607	0.81	0.513	2.72801e-13
SYNPO2	1.77917e-17	0.424381	0.715	0.485	3.22973e-13
NEXN	2.94725e-17	0.3967	0.936	0.754	5.35014e-13
RAB3IP	3.17976e-17	0.423016	0.877	0.753	5.77222e-13
KIAA1324L	5.36304e-17	0.317705	0.736	0.496	9.73552e-13
RBM24	5.86035e-17	0.358519	0.911	0.66	1.06383e-12
SPHKAP	7.39982e-17	0.371924	0.883	0.619	1.34329e-12
TSPAN18	8.13639e-17	0.320916	0.62	0.39	1.477e-12
PRDX1	1.74022e-16	0.597802	0.975	0.898	3.15902e-12
PPP1R1A	2.18306e-16	0.291836	0.905	0.637	3.96291e-12
RBPMS2	2.20469e-16	0.324578	0.972	0.775	4.00218e-12
STRIP2	3.04969e-16	0.306985	0.396	0.202	5.5361e-12
PGAM2	3.21441e-16	0.263306	0.46	0.246	5.83512e-12
FAM78A	3.91033e-16	0.338223	0.641	0.404	7.09843e-12
CYCS	4.21285e-16	0.342396	0.979	0.908	7.64759e-12
TSPAN9	4.42445e-16	0.396852	0.635	0.446	8.03171e-12
LRRC16A	4.60017e-16	0.347321	0.555	0.344	8.35068e-12
ZAK	4.68657e-16	0.392078	0.96	0.818	8.50753e-12
PGM1	4.70632e-16	0.364633	0.862	0.7	8.54338e-12
DUSP5	4.92382e-16	0.307517	0.469	0.256	8.9382e-12
HCN4	5.63438e-16	0.344323	0.911	0.699	1.02281e-11
CLIC5	6.88996e-16	0.333556	0.494	0.274	1.25074e-11
FOXP1	8.56719e-16	0.34687	0.951	0.84	1.5552e-11
ATP13A3	9.83322e-16	0.291444	0.92	0.762	1.78503e-11
AK1	1.06752e-15	0.416044	0.798	0.612	1.93787e-11
SNTA1	1.12713e-15	0.284496	0.89	0.632	2.04607e-11
CMYA5	1.92996e-15	0.308563	0.933	0.717	3.50345e-11
EPHB3	2.24478e-15	0.313841	0.613	0.398	4.07494e-11
BNIP3	2.33687e-15	0.401207	0.926	0.799	4.24213e-11
SLCO3A1	2.33814e-15	0.257156	0.39	0.19	4.24443e-11
WNK1	2.47638e-15	0.360795	0.89	0.821	4.49536e-11
TSPAN2	2.80638e-15	0.301917	0.724	0.501	5.09443e-11
EFNB3	3.02884e-15	0.360153	0.801	0.637	5.49825e-11
MT-ND4L	3.17632e-15	0.401884	0.994	0.977	5.76598e-11
CRIP1	3.47617e-15	0.384748	0.672	0.469	6.31029e-11
LHFPL2	3.54741e-15	0.32503	0.752	0.536	6.43961e-11
MMP15	5.66944e-15	0.344353	0.791	0.589	1.02917e-10
RHOQ	6.87035e-15	0.354662	0.893	0.78	1.24718e-10
ENO1	9.0046e-15	0.326857	0.991	0.976	1.63461e-10
MT-TM	9.72587e-15	0.393904	0.702	0.526	1.76554e-10
CCDC69	9.82577e-15	0.345766	0.669	0.477	1.78367e-10
ATP5D	1.09531e-14	0.311824	0.908	0.785	1.98832e-10
CCDC141	1.36597e-14	0.345048	0.779	0.552	2.47964e-10
COX5A	1.41636e-14	0.282689	0.975	0.93	2.57112e-10
ATP5C1	1.45327e-14	0.309199	0.979	0.948	2.63812e-10
PFKM	1.93726e-14	0.320895	0.859	0.73	3.51671e-10
CISD1	2.6458e-14	0.314228	0.813	0.626	4.80292e-10
APOBEC2	3.98289e-14	0.30501	0.733	0.481	7.23015e-10
MTSS1	4.10521e-14	0.301705	0.574	0.383	7.45219e-10
COX7B	5.90359e-14	0.269826	1	0.94	1.07168e-09
TBX2	5.9649e-14	0.364487	0.555	0.343	1.08281e-09
RNF207	6.59763e-14	0.314999	0.604	0.395	1.19767e-09
FABP3	8.36517e-14	0.271294	0.776	0.574	1.51853e-09
ID2	9.3616e-14	0.314359	0.936	0.781	1.69941e-09
NES	1.02569e-13	0.297647	0.933	0.78	1.86193e-09
NCAM1	1.06442e-13	0.346951	0.957	0.752	1.93224e-09
SEMA6D	1.06548e-13	0.363579	0.675	0.462	1.93416e-09
MYH7B	1.14219e-13	0.28106	0.574	0.353	2.07342e-09
SGCA	1.15754e-13	0.289156	0.61	0.396	2.10129e-09
DIXDC1	1.54907e-13	0.297563	0.752	0.56	2.81203e-09
PDLIM5	1.78534e-13	0.305741	1	0.963	3.24092e-09
CENPV	1.89545e-13	0.259721	0.457	0.27	3.4408e-09
MT-TL1	1.99703e-13	0.279833	0.715	0.521	3.62521e-09
EDNRA	3.23393e-13	0.256802	0.798	0.564	5.87055e-09
NR2F1	3.27334e-13	0.256655	0.396	0.203	5.9421e-09
ATP5O	3.89765e-13	0.260375	0.985	0.951	7.0754e-09
IDH3A	4.52829e-13	0.326606	0.684	0.508	8.22021e-09
ABAT	4.55137e-13	0.290245	0.571	0.375	8.26211e-09
MLIP	4.99835e-13	0.268772	0.712	0.494	9.0735e-09
MTFR1L	5.14125e-13	0.27089	0.767	0.588	9.33291e-09
NDUFS7	8.05475e-13	0.291429	0.736	0.573	1.46218e-08
FBXO32	9.2623e-13	0.319131	0.724	0.524	1.68138e-08
IDI1	9.67427e-13	0.383076	0.773	0.651	1.75617e-08
SUCLG1	1.17167e-12	0.277839	0.874	0.728	2.12694e-08
BVES	1.53696e-12	0.344143	0.656	0.459	2.79005e-08
SH3PXD2A	1.59044e-12	0.257987	0.678	0.481	2.88713e-08
GATA6-AS1	1.86582e-12	0.360671	0.558	0.372	3.38703e-08
ARHGAP26	3.38292e-12	0.270476	0.552	0.372	6.14102e-08
VDAC2	3.99348e-12	0.272392	0.969	0.936	7.24936e-08
SMAD9	5.04262e-12	0.348116	0.681	0.512	9.15387e-08
KLHDC3	9.9858e-12	0.278967	0.966	0.899	1.81272e-07
ASPH	1.01613e-11	0.278875	0.902	0.795	1.84457e-07
REEP1	1.07286e-11	0.25471	0.641	0.44	1.94757e-07
MYOZ2	1.07886e-11	0.260896	0.847	0.582	1.95846e-07
C1orf105	1.19536e-11	0.255605	0.414	0.235	2.16994e-07
EPM2AIP1	1.29458e-11	0.282842	0.951	0.869	2.35004e-07
ATP1B2	1.38972e-11	0.307453	0.942	0.819	2.52276e-07
GOLIM4	2.0037e-11	0.392615	0.831	0.727	3.63732e-07
ABCC5	2.32343e-11	0.302689	0.699	0.547	4.21772e-07
BZW2	2.69609e-11	0.280805	0.926	0.815	4.89421e-07
MADD	4.41753e-11	0.261823	0.549	0.386	8.01914e-07
HRC	4.51258e-11	0.2582	0.748	0.551	8.19169e-07
TXNIP	4.5998e-11	0.254189	0.96	0.845	8.35001e-07
FADS1	4.73974e-11	0.32936	0.917	0.818	8.60405e-07
PLEKHA5	5.31506e-11	0.278457	0.81	0.677	9.64842e-07
LPGAT1	5.4254e-11	0.289659	0.727	0.549	9.84873e-07
PPARGC1A	7.002e-11	0.254652	0.712	0.501	1.27107e-06
ETFB	7.29798e-11	0.266095	0.779	0.651	1.3248e-06
GSE1	7.8608e-11	0.270721	0.721	0.564	1.42697e-06
PFKP	7.88859e-11	0.275915	0.936	0.789	1.43202e-06
CBX4	8.49583e-11	0.276892	0.66	0.502	1.54225e-06
HSDL1	2.28153e-10	0.260132	0.601	0.447	4.14166e-06
UQCRC2	2.57674e-10	0.257887	0.957	0.89	4.67756e-06
HIPK3	3.89882e-10	0.344729	0.828	0.772	7.07753e-06
FXYD6	4.71065e-10	0.264975	0.874	0.72	8.55124e-06
TIPARP	6.37778e-10	0.262278	0.699	0.511	1.15776e-05
MAN1C1	1.58059e-09	0.263764	0.497	0.338	2.86925e-05
VEGFB	1.86774e-09	0.25912	0.856	0.759	3.3905e-05
HMBOX1	3.65304e-09	0.260342	0.687	0.554	6.63136e-05
MT-ATP8	4.10744e-09	0.271636	1	0.994	7.45624e-05
TAB2	6.06583e-09	0.298686	0.822	0.759	0.000110113
AGL	7.1324e-09	0.254794	0.752	0.624	0.000129475
HSPB2	9.90053e-09	0.311702	0.466	0.311	0.000179724
PRNP	3.16155e-08	0.27592	0.607	0.486	0.000573916
SLC25A37	6.15374e-08	0.250181	0.736	0.605	0.00111709
MT-TK	7.30437e-08	0.274746	0.801	0.688	0.00132596
C20orf166-AS1	7.68529e-08	0.290509	0.632	0.501	0.00139511
YAP1	1.05411e-07	0.255904	0.896	0.831	0.00191353
HAND2-AS1	4.39097e-07	0.273978	0.491	0.364	0.00797093
RSPO3	1.38693e-06	0.391719	0.509	0.384	0.0251769
LINC00997	3.06188e-05	0.251944	0.552	0.478	0.555823
SYNE2	7.05832e-05	0.270971	0.773	0.735	1
GNB2L1	0.000279039	0.441138	0.291	0.202	1
C17orf76-AS1	0.00110809	0.309864	0.267	0.196	1
UGDH-AS1	0.00849258	0.302628	0.623	0.554	1
BMP2	0.0117164	0.331987	0.626	0.557	1

## Sheet: cluster1
	p_val	avg_log2FC	pct.1	pct.2	p_val_adj
MYH11	3.59679e-136	2.98992	0.924	0.331	6.52926e-132		as shown in Figure 7
PAM	1.1081e-117	2.0648	0.997	0.851	2.01153e-113
ISL1	3.66396e-109	1.7628	0.934	0.437	6.65118e-105
ATP2A2	1.44153e-104	1.46205	1	0.951	2.61681e-100
VSNL1	7.06993e-102	1.60951	0.827	0.306	1.2834e-97
POPDC2	1.72484e-100	1.60933	0.99	0.632	3.13111e-96
SLIT2	7.47039e-100	1.70147	0.96	0.645	1.3561e-95
SHOX2	4.58132e-97	1.60669	0.887	0.351	8.31647e-93
GSTO1	3.18081e-95	1.23162	0.97	0.766	5.77412e-91
ASAH1	1.77457e-89	1.23346	0.973	0.749	3.22137e-85
MPP6	3.27183e-88	1.14902	0.827	0.353	5.93936e-84
BMP4	4.59377e-87	2.27384	0.937	0.609	8.33908e-83
WLS	3.69225e-83	1.32977	0.977	0.84	6.70254e-79
LOC642366	1.1159e-80	0.782707	0.625	0.146	2.0257e-76
BTG1	1.79128e-76	1.17235	0.96	0.782	3.25171e-72
PLCB1	1.12424e-74	1.1593	0.841	0.435	2.04083e-70
RASL10B	2.76672e-72	0.829217	0.814	0.344	5.02242e-68
PRDX1	9.58945e-71	1.14011	0.997	0.895	1.74077e-66
WIPF3	3.84484e-70	0.816741	0.731	0.265	6.97954e-66
DKK1	1.30456e-69	1.53254	0.718	0.247	2.36817e-65
THSD7A	6.46616e-69	0.89664	0.821	0.359	1.1738e-64
GPR37	4.27539e-67	1.01881	0.877	0.474	7.76111e-63
PPP1R1A	4.71851e-67	1.12173	0.947	0.632	8.56552e-63
TECRL	7.75131e-67	1.08162	1	0.841	1.40709e-62
CLGN	8.92278e-63	0.763495	0.711	0.268	1.61975e-58
CAPN3	1.0641e-62	1.35341	0.807	0.387	1.93165e-58
BMP5	1.39099e-61	0.903438	0.924	0.628	2.52506e-57
CDH2	1.41723e-59	0.845591	0.983	0.813	2.57271e-55
CNNM1	2.67768e-59	0.49855	0.412	0.074	4.86079e-55
FITM1	9.94972e-58	0.878526	0.914	0.521	1.80617e-53
SHD	1.19436e-57	0.995381	0.88	0.505	2.16812e-53
CMYA5	1.99997e-57	1.03684	0.963	0.714	3.63055e-53
TSPAN2	2.75301e-57	0.922256	0.834	0.481	4.99754e-53
MYH6	2.09605e-55	1.13554	1	0.744	3.80496e-51
ATP1B2	2.54733e-55	0.793318	0.977	0.814	4.62417e-51
PDLIM5	9.90112e-54	0.781349	1	0.963	1.79735e-49
TNNT2	4.21174e-53	0.867012	1	0.978	7.64556e-49
LRRTM3	4.01425e-52	0.701571	0.492	0.131	7.28707e-48
NELL1	9.68151e-52	0.645173	0.515	0.14	1.75748e-47
LAPTM4B	4.00125e-51	0.688818	0.99	0.972	7.26346e-47
RASSF5	7.0288e-51	0.729014	0.85	0.453	1.27594e-46
WNT5A	7.03566e-51	1.09666	0.827	0.499	1.27718e-46
KIAA1324L	2.45542e-50	0.78446	0.827	0.481	4.45733e-46
CADPS2	2.57349e-50	0.751026	0.857	0.482	4.67166e-46
SMPX	3.24669e-50	0.881874	0.963	0.622	5.89372e-46
HTRA1	6.31037e-50	1.0207	0.9	0.632	1.14552e-45
SCP2	3.46022e-49	0.77046	0.89	0.71	6.28133e-45
FRMPD4	5.47331e-49	0.493621	0.422	0.093	9.9357e-45
SLC8A1	6.79781e-49	0.823419	0.98	0.801	1.23401e-44
COL4A6	1.05513e-48	0.857734	0.93	0.719	1.91538e-44
C1orf105	1.74938e-48	0.613273	0.595	0.2	3.17565e-44
TBX5	3.7615e-48	0.841497	0.95	0.689	6.82826e-44
COLQ	6.97586e-48	0.620162	0.625	0.254	1.26633e-43
TTN	1.48712e-47	1.07481	1	0.978	2.69958e-43
NTM	1.4754e-46	0.36407	0.342	0.063	2.6783e-42
CPEB4	3.00873e-46	0.779577	0.894	0.625	5.46176e-42
HSPB3	1.16552e-45	0.757836	0.837	0.46	2.11577e-41
LRRTM1	7.80539e-45	0.463323	0.415	0.099	1.41691e-40
COL9A1	1.07279e-44	0.421967	0.432	0.108	1.94743e-40
MYL7	1.78897e-44	1.00394	1	0.973	3.24752e-40
TMEM87A	2.05551e-44	0.751279	0.887	0.655	3.73136e-40
PPP1R12B	2.33792e-44	0.842894	0.977	0.751	4.24402e-40
LSAMP	1.38409e-43	0.766749	0.791	0.424	2.51254e-39
KLHL41	4.12648e-42	0.77501	0.92	0.59	7.4908e-38
NES	2.99689e-40	0.834715	0.94	0.781	5.44025e-36
NBEA	4.27636e-40	0.754389	0.814	0.538	7.76288e-36
KCNIP2	4.73434e-40	1.02331	0.801	0.443	8.59425e-36
BMP7	6.39528e-40	0.742757	0.731	0.391	1.16094e-35
ADD1	6.78591e-40	0.726138	0.94	0.877	1.23185e-35
FAM19A4	8.62289e-40	0.444422	0.352	0.081	1.56531e-35
KCNIP4	2.0666e-39	0.565266	0.618	0.249	3.75151e-35
ADPRHL1	2.43879e-39	0.674203	0.894	0.548	4.42714e-35
GARNL3	3.29306e-39	0.638426	0.628	0.304	5.9779e-35
LDHB	4.77794e-39	0.574221	1	0.976	8.6734e-35
ESRRG	5.49109e-39	0.718118	0.724	0.382	9.96797e-35
UBR3	5.56147e-39	0.679968	0.877	0.691	1.00957e-34
MGAT5	7.44581e-39	0.798722	0.751	0.45	1.35164e-34
CACNA1D	3.02595e-38	0.554965	0.701	0.326	5.493e-34
ABCC9	3.15051e-38	0.366267	0.425	0.125	5.71912e-34
UNC45B	1.19037e-37	0.650027	0.914	0.608	2.16088e-33
MYL4	3.05084e-37	0.758382	0.997	0.763	5.53818e-33
FRMD4B	6.027e-37	0.65771	0.86	0.618	1.09408e-32
TMBIM6	1.71414e-36	0.579145	0.993	0.969	3.11169e-32
TMX4	2.12429e-36	0.732647	0.877	0.676	3.85623e-32
TBX3	2.32874e-36	0.949213	0.608	0.283	4.22736e-32
MDH1	3.31372e-36	0.604951	0.997	0.911	6.01539e-32
MYOM1	3.34851e-36	0.667165	0.967	0.696	6.07855e-32
PLCL2	3.85578e-36	0.657915	0.718	0.377	6.99941e-32
PLCL1	4.58207e-36	0.381449	0.429	0.127	8.31783e-32
RPS6KA2	5.65086e-36	0.723417	0.821	0.564	1.0258e-31
KIAA0319	1.78821e-35	0.336083	0.419	0.124	3.24614e-31
FEZ1	2.68376e-35	0.620297	0.738	0.446	4.87184e-31
PDGFRA	3.28651e-35	0.772257	0.834	0.517	5.96601e-31
ZAK	4.23345e-35	0.645904	0.957	0.821	7.68498e-31
MYBPHL	7.58562e-35	0.324328	0.365	0.097	1.37702e-30
NPTN	8.09265e-35	0.589813	0.944	0.863	1.46906e-30
ATP5B	1.06856e-34	0.49679	1	0.982	1.93976e-30
PMP22	1.1971e-34	0.687868	0.608	0.274	2.17309e-30
LIMCH1	1.34492e-34	0.671023	0.774	0.451	2.44144e-30
ASPH	3.71014e-33	0.591136	0.92	0.793	6.73501e-29
JAG1	3.83041e-33	0.608448	0.817	0.541	6.95335e-29
TNFAIP8	4.57644e-33	0.548995	0.714	0.402	8.30761e-29
CXCL12	5.88708e-33	0.98694	0.777	0.467	1.06868e-28
EEF1A2	6.26756e-33	0.615792	0.894	0.616	1.13775e-28
GRIK1	9.69945e-33	0.381386	0.419	0.129	1.76074e-28
MEF2C	1.10046e-32	0.657557	0.817	0.535	1.99766e-28
FBXO9	1.48167e-32	0.533939	0.904	0.772	2.68967e-28
PRDM6	1.73619e-32	0.524968	0.532	0.214	3.15171e-28
B3GALT2	1.82001e-32	0.357224	0.352	0.096	3.30386e-28
RGS6	1.8264e-32	0.462019	0.468	0.174	3.31547e-28
ETV1	1.9888e-32	0.567923	0.837	0.506	3.61026e-28
RYR2	2.57155e-32	0.654134	0.95	0.779	4.66814e-28
SPHKAP	2.77009e-32	0.693322	0.914	0.617	5.02855e-28
DOK6	2.82113e-32	0.483278	0.522	0.207	5.1212e-28
ZDHHC2	4.36944e-32	0.551485	0.731	0.449	7.93184e-28
TRDN	1.67647e-31	0.637312	0.957	0.643	3.0433e-27
CAMK2D	1.69668e-31	0.573247	0.94	0.858	3.07999e-27
CCDC141	1.90697e-31	0.604996	0.841	0.543	3.46172e-27
NEBL	2.74933e-31	0.668017	0.993	0.788	4.99086e-27
VWDE	9.94636e-31	0.52412	0.874	0.535	1.80556e-26
RRAD	1.00048e-30	0.783566	0.821	0.516	1.81618e-26
DENND1B	1.79538e-30	0.506666	0.684	0.394	3.25915e-26
KIAA1456	7.1563e-30	0.413567	0.545	0.248	1.29908e-25
HOMER1	7.58214e-30	0.475416	0.661	0.368	1.37639e-25
NDUFA4	1.14673e-29	0.482971	0.997	0.987	2.08166e-25
LPGAT1	1.32165e-29	0.697315	0.781	0.54	2.39919e-25
SNTA1	1.81159e-29	0.550879	0.877	0.639	3.28859e-25
SGPP2	1.98779e-29	0.571182	0.515	0.231	3.60843e-25
NRTN	4.84432e-29	0.484883	0.718	0.415	8.79389e-25
RNF150	1.10965e-28	0.485549	0.738	0.455	2.01435e-24
ZC2HC1A	1.13003e-28	0.534782	0.791	0.561	2.05135e-24
ATP5H	1.31446e-28	0.475379	0.97	0.914	2.38615e-24
ZNF91	4.02524e-28	0.605869	0.764	0.583	7.30703e-24
LINC00648	6.54691e-28	0.438552	0.505	0.222	1.18846e-23
ELL2	9.86494e-28	0.547624	0.721	0.449	1.79078e-23
EDNRA	1.3613e-27	0.550602	0.847	0.557	2.47118e-23
LGI2	1.90292e-27	0.60983	0.764	0.484	3.45437e-23
GULP1	2.00926e-27	0.486983	0.691	0.409	3.64742e-23
SEPW1	4.44782e-27	0.408938	0.99	0.968	8.07412e-23
FZD7	1.44211e-26	0.60862	0.694	0.45	2.61786e-22
ACOT13	1.44775e-26	0.548487	0.904	0.728	2.62811e-22
MYBPC3	1.54506e-26	0.535529	0.95	0.634	2.80475e-22
MITF	1.78625e-26	0.512721	0.86	0.611	3.24258e-22
HCN1	1.97407e-26	0.467854	0.571	0.287	3.58353e-22
SLC30A3	2.3548e-26	0.546162	0.664	0.367	4.27467e-22
PDK1	6.18375e-26	0.524554	0.92	0.698	1.12254e-21
SYNPO2L	6.73592e-26	0.603934	0.801	0.519	1.22277e-21
COL4A5	7.65883e-26	0.487789	0.95	0.888	1.39031e-21
EPHA7	8.02013e-26	0.562986	0.628	0.34	1.45589e-21
LMO3	2.08964e-25	0.25785	0.329	0.1	3.79333e-21
HDAC9	2.96192e-25	0.493039	0.691	0.41	5.37677e-21
ATP1A2	3.5576e-25	0.602358	0.671	0.396	6.45812e-21
ATP8A2	4.1494e-25	0.276762	0.279	0.075	7.53241e-21
PTK2B	4.23415e-25	0.542144	0.558	0.285	7.68626e-21
NCAM1	5.20395e-25	0.515959	0.963	0.754	9.44674e-21
TDP2	5.57069e-25	0.491758	0.794	0.564	1.01125e-20
SLC25A4	6.15869e-25	0.489793	0.983	0.869	1.11799e-20
ITGB1BP2	7.84871e-25	0.456052	0.704	0.414	1.42478e-20
RBPMS2	9.80926e-25	0.508066	0.934	0.787	1.78068e-20
UQCR10	1.24156e-24	0.465227	0.92	0.808	2.25381e-20
PIP4K2A	1.36275e-24	0.559825	0.718	0.468	2.47381e-20
FGD6	1.71623e-24	0.576465	0.741	0.539	3.11547e-20
GOT1	1.8062e-24	0.50044	0.9	0.736	3.27879e-20
JMJD1C	1.83322e-24	0.562042	0.88	0.746	3.32785e-20
PRKG1	2.0984e-24	0.409728	0.545	0.271	3.80923e-20
PPARGC1A	2.32686e-24	0.451877	0.767	0.493	4.22394e-20
DMD	3.13804e-24	0.550055	0.831	0.599	5.69648e-20
PKIA	3.94014e-24	0.511269	0.774	0.534	7.15253e-20
HRC	4.0158e-24	0.453624	0.817	0.54	7.28988e-20
HAND2	1.13887e-23	0.519336	0.96	0.779	2.06738e-19
RBM24	1.25982e-23	0.513506	0.91	0.664	2.28695e-19
BAZ2B	1.3401e-23	0.580307	0.824	0.668	2.43268e-19
ARL5A	1.67779e-23	0.472503	0.904	0.796	3.0457e-19
PTGER3	1.83395e-23	0.294974	0.362	0.134	3.32916e-19
RORA	1.95022e-23	0.334421	0.465	0.2	3.54024e-19
ECHDC2	3.79162e-23	0.42416	0.678	0.422	6.88294e-19
HCN4	4.08557e-23	0.590796	0.89	0.707	7.41653e-19
HS2ST1	4.20979e-23	0.450486	0.807	0.594	7.64204e-19
POU4F1	4.79184e-23	0.27413	0.219	0.05	8.69863e-19
CPVL	5.02672e-23	0.447373	0.714	0.456	9.12501e-19
LMO7	6.02605e-23	0.502205	0.804	0.578	1.09391e-18
SH3GLB1	8.57786e-23	0.497997	0.914	0.824	1.55714e-18
NRP1	9.20855e-23	0.509566	0.811	0.604	1.67163e-18
COX8A	1.2315e-22	0.405417	0.987	0.967	2.23555e-18
SLC7A2	1.50333e-22	0.539339	0.801	0.608	2.72899e-18
SHISA2	3.288e-22	0.449444	0.621	0.356	5.96871e-18
LHFPL2	4.11327e-22	0.480444	0.767	0.537	7.46683e-18
CRYZ	4.84845e-22	0.444592	0.678	0.425	8.8014e-18
MXRA7	6.50771e-22	0.423238	0.98	0.903	1.18135e-17
FGFR2	8.10712e-22	0.502323	0.734	0.522	1.47169e-17
DIXDC1	8.22098e-22	0.492089	0.777	0.558	1.49235e-17
NEXN	8.62873e-22	0.486324	0.95	0.754	1.56637e-17
TIMP3	1.5678e-21	0.491555	0.877	0.667	2.84603e-17
SH3RF2	1.66445e-21	0.406305	0.518	0.258	3.02148e-17
SLC25A12	2.78719e-21	0.442174	0.804	0.596	5.05959e-17
MASP1	5.59201e-21	0.429692	0.522	0.264	1.01512e-16
CIRBP	5.66209e-21	0.397988	0.993	0.967	1.02784e-16
ZNF608	5.70666e-21	0.453058	0.787	0.573	1.03593e-16
SOBP	8.4374e-21	0.452957	0.625	0.375	1.53164e-16
NDUFA11	1.08375e-20	0.456311	0.937	0.84	1.96733e-16
ALDH1A1	1.19692e-20	0.501483	0.276	0.086	2.17277e-16
MYL9	1.61259e-20	0.448177	0.997	0.975	2.92734e-16
STRN	2.12354e-20	0.455209	0.831	0.645	3.85486e-16
ABTB2	2.25745e-20	0.303342	0.389	0.162	4.09795e-16
NDUFV2	3.65953e-20	0.43018	0.94	0.853	6.64314e-16
TBX5-AS1	4.83617e-20	0.252928	0.362	0.143	8.7791e-16
FRMD3	6.30676e-20	0.367051	0.545	0.287	1.14487e-15
LACC1	7.42491e-20	0.385409	0.488	0.255	1.34784e-15
ALDOA	9.59307e-20	0.418667	0.993	0.942	1.74143e-15
CORO6	1.03939e-19	0.41699	0.764	0.529	1.88681e-15
USP46	2.05721e-19	0.413985	0.734	0.556	3.73445e-15
ZNF385B	3.25817e-19	0.499819	0.701	0.467	5.91455e-15
HIPK2	4.14677e-19	0.455909	0.874	0.774	7.52763e-15
CASZ1	5.48667e-19	0.383386	0.635	0.391	9.95995e-15
REEP3	8.06895e-19	0.390702	0.841	0.691	1.46476e-14
NUDT4	8.72005e-19	0.449076	0.701	0.455	1.58295e-14
MYLK3	8.94253e-19	0.489595	0.698	0.477	1.62334e-14
NFIC	1.60212e-18	0.462849	0.907	0.733	2.90833e-14
GAPDH	1.77853e-18	0.253317	1	1	3.22856e-14
TRIB1	2.57162e-18	0.408576	0.688	0.439	4.66827e-14
VEGFC	2.81702e-18	0.361745	0.635	0.368	5.11373e-14
UGP2	3.06141e-18	0.487763	0.967	0.88	5.55738e-14
UPRT	3.90486e-18	0.27682	0.432	0.208	7.0885e-14
TULP3	3.92934e-18	0.364392	0.608	0.391	7.13292e-14
TSPAN7	4.66296e-18	0.261263	0.412	0.188	8.46466e-14
PLN	5.9048e-18	0.42634	0.953	0.772	1.0719e-13
MAP1B	8.94044e-18	0.446636	0.97	0.918	1.62296e-13
PPAP2B	9.57636e-18	0.392354	0.276	0.1	1.7384e-13
RASL11B	1.18871e-17	0.44279	0.664	0.435	2.15786e-13
NDUFB5	1.51487e-17	0.370809	0.934	0.857	2.74994e-13
VPS8	1.79937e-17	0.393861	0.658	0.453	3.2664e-13
RGS4	2.52537e-17	0.418341	0.395	0.181	4.5843e-13
SLC39A8	3.1755e-17	0.275858	0.452	0.229	5.76448e-13
ATP5G3	3.45663e-17	0.33872	0.997	0.985	6.27483e-13
ACTN2	3.68996e-17	0.373268	0.973	0.76	6.69838e-13
HRASLS	4.13402e-17	0.317654	0.495	0.262	7.50449e-13
PHACTR3	4.17401e-17	0.262408	0.282	0.105	7.57708e-13
CITED4	4.30368e-17	0.416625	0.694	0.452	7.81247e-13
KIAA1191	1.07276e-16	0.373269	0.834	0.748	1.94738e-12
TMEM14B	1.07332e-16	0.369722	0.87	0.725	1.9484e-12
ATP5A1	1.10065e-16	0.290194	0.993	0.982	1.998e-12
MLF1	1.28657e-16	0.417345	0.691	0.491	2.33551e-12
TNRC6B	1.2959e-16	0.37681	0.87	0.759	2.35245e-12
MDGA2	1.30214e-16	0.295868	0.302	0.124	2.36377e-12
RNF8	1.48946e-16	0.447392	0.621	0.424	2.70382e-12
PROX1	1.52078e-16	0.358089	0.678	0.447	2.76066e-12
GNAO1	1.53572e-16	0.312128	0.375	0.169	2.78778e-12
CHCHD10	1.84655e-16	0.388017	0.95	0.75	3.35204e-12
SPRY4	2.45319e-16	0.32106	0.339	0.148	4.45327e-12
TMEM47	2.88886e-16	0.500307	0.714	0.531	5.24416e-12
DANCR	2.95942e-16	0.399226	0.817	0.643	5.37223e-12
ITGB5	3.33734e-16	0.441189	0.784	0.587	6.05828e-12
SSH2	3.42415e-16	0.275533	0.525	0.305	6.21586e-12
LOC100505687	3.66592e-16	0.258968	0.246	0.087	6.65474e-12
SYNPO2	3.68328e-16	0.308433	0.744	0.483	6.68625e-12
TCEA3	4.16718e-16	0.396952	0.764	0.518	7.56469e-12
KLHDC3	4.42668e-16	0.317322	0.927	0.909	8.03576e-12
PDHA1	4.92608e-16	0.357677	0.924	0.82	8.94231e-12
GNG12	6.32982e-16	0.433507	0.807	0.649	1.14905e-11
ADAM11	7.52458e-16	0.328283	0.542	0.311	1.36594e-11
AUTS2	8.12905e-16	0.398558	0.711	0.521	1.47567e-11
DLG3	8.33321e-16	0.322376	0.575	0.36	1.51273e-11
CCDC88A	9.32844e-16	0.420264	0.817	0.713	1.69339e-11
FNIP2	1.01556e-15	0.397617	0.698	0.514	1.84355e-11
COX7B	1.17208e-15	0.330387	0.98	0.945	2.12768e-11
HIST1H1C	1.38827e-15	0.272848	0.382	0.181	2.52013e-11
CLIC4	1.43832e-15	0.31198	0.897	0.843	2.61099e-11
APOBEC2	1.45813e-15	0.399897	0.731	0.486	2.64694e-11
COX6B1	1.49047e-15	0.326884	0.963	0.941	2.70565e-11
HIST2H2BE	1.50968e-15	0.343257	0.621	0.409	2.74052e-11
CYCS	1.52765e-15	0.378176	0.98	0.909	2.77315e-11
MLLT3	1.64876e-15	0.325674	0.581	0.363	2.993e-11
CTSL2	1.66258e-15	0.426915	0.256	0.096	3.01808e-11
XPR1	2.12556e-15	0.395862	0.791	0.612	3.85853e-11
CDK8	2.14211e-15	0.524673	0.528	0.352	3.88858e-11
TESC	2.22275e-15	0.367797	0.591	0.37	4.03496e-11
TNNI3	2.58024e-15	0.398295	0.764	0.55	4.68391e-11
FAM127A	2.98083e-15	0.311454	0.95	0.917	5.41111e-11
ATP5O	3.2652e-15	0.319866	0.983	0.952	5.92732e-11
CD59	3.50359e-15	0.384371	0.877	0.807	6.36006e-11
CHP1	3.53616e-15	0.362442	0.847	0.75	6.4192e-11
PTP4A2	3.63018e-15	0.326348	0.96	0.935	6.58987e-11
MEF2A	4.21858e-15	0.352088	0.934	0.833	7.65799e-11
HSD17B12	4.56808e-15	0.411318	0.907	0.829	8.29244e-11
PRDX2	5.17922e-15	0.368796	0.97	0.903	9.40183e-11
COX5B	8.28569e-15	0.310865	0.973	0.918	1.5041e-10
PTGES3L	8.58355e-15	0.317095	0.532	0.325	1.55817e-10
ECH1	9.25874e-15	0.319699	0.927	0.888	1.68074e-10
DECR1	9.49959e-15	0.352755	0.784	0.635	1.72446e-10
MAP4	1.03639e-14	0.373055	0.917	0.858	1.88135e-10
FBXO32	1.50052e-14	0.297753	0.744	0.524	2.7239e-10
RBP1	1.56703e-14	0.270705	0.568	0.344	2.84464e-10
ANTXR2	1.7012e-14	0.301774	0.581	0.37	3.08818e-10
GPI	1.94368e-14	0.33141	0.953	0.888	3.52836e-10
ENAH	2.10685e-14	0.298553	0.963	0.93	3.82457e-10
SYNM	2.25252e-14	0.286074	0.478	0.261	4.089e-10
PFKM	2.31932e-14	0.353056	0.854	0.734	4.21026e-10
HK1	2.46462e-14	0.332495	0.937	0.872	4.47403e-10
NRXN1	2.89861e-14	0.424926	0.575	0.363	5.26186e-10
HSPB2	2.90853e-14	0.289425	0.528	0.301	5.27985e-10
NDRG2	2.93322e-14	0.368214	0.794	0.654	5.32468e-10
TIPARP	3.89053e-14	0.342223	0.704	0.514	7.06247e-10
KTN1	4.23667e-14	0.33406	0.914	0.903	7.69082e-10
LIX1	5.57593e-14	0.438676	0.555	0.358	1.0122e-09
KANK1	7.20943e-14	0.400779	0.787	0.63	1.30873e-09
ALDH3A2	7.82147e-14	0.409325	0.774	0.62	1.41983e-09
ATP5C1	1.19046e-13	0.292317	0.98	0.948	2.16104e-09
NDUFA1	1.31008e-13	0.323343	0.94	0.911	2.37819e-09
S1PR3	1.3106e-13	0.30044	0.525	0.303	2.37914e-09
AR	1.40175e-13	0.267948	0.279	0.117	2.54459e-09
CCDC50	1.46368e-13	0.438743	0.811	0.695	2.65702e-09
CFL2	1.83039e-13	0.326375	0.92	0.85	3.32271e-09
MYOZ2	2.10308e-13	0.26725	0.837	0.589	3.81772e-09
PPP2R3A	2.19604e-13	0.381453	0.797	0.665	3.98647e-09
ANK2	2.33681e-13	0.328973	0.638	0.428	4.24201e-09
MLLT11	2.37663e-13	0.389685	0.89	0.795	4.3143e-09
MAPKAPK2	2.68606e-13	0.315967	0.857	0.753	4.876e-09
DST	3.01172e-13	0.478704	0.804	0.751	5.46717e-09
SLC47A1	3.74731e-13	0.310011	0.462	0.264	6.8025e-09
PNRC1	4.88022e-13	0.328083	0.937	0.907	8.85907e-09
KIF1C	5.20951e-13	0.29198	0.767	0.606	9.45683e-09
PRKAR2B	5.63046e-13	0.342277	0.668	0.474	1.0221e-08
MT-RNR2	5.89634e-13	0.294304	1	1	1.07036e-08
UQCRB	6.2522e-13	0.340533	0.834	0.729	1.13496e-08
C14orf2	6.32162e-13	0.307346	0.944	0.868	1.14756e-08
PLCB4	6.76214e-13	0.34685	0.701	0.516	1.22753e-08
ENO3	6.8724e-13	0.31557	0.841	0.619	1.24755e-08
TPI1	6.87319e-13	0.306511	0.993	0.964	1.24769e-08
ARHGAP42	1.1065e-12	0.350035	0.555	0.365	2.00862e-08
PCGF5	1.11563e-12	0.323884	0.591	0.408	2.0252e-08
TRH	1.33775e-12	0.43428	0.738	0.519	2.42842e-08
VLDLR	1.3528e-12	0.307809	0.598	0.41	2.45574e-08
EID1	1.42521e-12	0.261601	0.97	0.968	2.58719e-08
SCD	1.78922e-12	0.352888	0.904	0.83	3.24797e-08
PLEKHA6	1.81343e-12	0.299903	0.561	0.37	3.29191e-08
NNT	1.92744e-12	0.327963	0.837	0.75	3.49888e-08
LEF1	2.23044e-12	0.330202	0.498	0.315	4.04891e-08
HMGB1	2.49049e-12	0.27311	0.993	0.974	4.52099e-08
ATF7IP2	2.53965e-12	0.287516	0.455	0.276	4.61022e-08
NDUFC1	2.73051e-12	0.308377	0.924	0.872	4.95669e-08
CFLAR	2.73924e-12	0.394912	0.87	0.832	4.97255e-08
GATA6	2.76507e-12	0.362353	0.857	0.71	5.01942e-08
BCL6	3.74773e-12	0.402254	0.492	0.318	6.80325e-08
IDH2	4.10084e-12	0.297486	0.89	0.825	7.44426e-08
PPFIA2	4.18064e-12	0.313171	0.429	0.236	7.58911e-08
PCM1	4.19297e-12	0.318687	0.897	0.812	7.61149e-08
MYOZ1	4.34534e-12	0.377371	0.528	0.349	7.88809e-08
RNF207	4.45288e-12	0.256775	0.611	0.397	8.08332e-08
BASP1	5.3067e-12	0.376274	0.88	0.741	9.63326e-08
OAZ2	5.41021e-12	0.292598	0.884	0.788	9.82115e-08
MGARP	5.7213e-12	0.289126	0.558	0.343	1.03859e-07
UQCR11	6.29228e-12	0.326373	0.9	0.787	1.14224e-07
COX5A	6.78799e-12	0.29173	0.963	0.933	1.23222e-07
COX7C	7.39294e-12	0.263166	1	0.992	1.34204e-07
SMC6	7.87763e-12	0.352266	0.628	0.461	1.43003e-07
CDC14B	8.6459e-12	0.290481	0.711	0.533	1.56949e-07
BCO2	9.9632e-12	0.26253	0.382	0.209	1.80862e-07
REEP1	1.10332e-11	0.263492	0.648	0.442	2.00285e-07
ATP5D	1.20182e-11	0.31706	0.88	0.793	2.18166e-07
TMEM167A	1.23759e-11	0.308347	0.904	0.845	2.2466e-07
CACNB2	1.25494e-11	0.310663	0.668	0.474	2.2781e-07
TRABD2B	1.39817e-11	0.26383	0.429	0.246	2.5381e-07
LMTK2	1.40707e-11	0.2969	0.488	0.32	2.55425e-07
PTPLA	1.42332e-11	0.324996	0.299	0.143	2.58375e-07
FAM214A	1.42344e-11	0.305735	0.588	0.42	2.58397e-07
NDUFB3	1.68259e-11	0.317041	0.797	0.685	3.0544e-07
PTP4A3	1.69486e-11	0.289264	0.777	0.63	3.07669e-07
GSTT1	1.80436e-11	0.269534	0.299	0.143	3.27546e-07
MGST3	1.87468e-11	0.303113	0.973	0.938	3.4031e-07
ITGA7	2.0216e-11	0.251221	0.495	0.302	3.66982e-07
GTF2F2	2.02685e-11	0.311143	0.561	0.393	3.67934e-07
VDAC2	2.10286e-11	0.286279	0.967	0.937	3.81733e-07
ACTC1	2.82834e-11	0.274468	1	1	5.13428e-07
PITPNB	3.3614e-11	0.322121	0.867	0.774	6.10195e-07
CSRNP3	4.09506e-11	0.284121	0.498	0.325	7.43376e-07
LOC401321	4.111e-11	0.37033	0.299	0.147	7.4627e-07
MACF1	5.85503e-11	0.296312	0.937	0.885	1.06286e-06
TMEM133	6.90762e-11	0.277543	0.598	0.398	1.25394e-06
ATP5J	8.71329e-11	0.261281	0.973	0.97	1.58172e-06
CKM	1.03633e-10	0.316738	0.847	0.638	1.88125e-06
NDUFB10	1.10677e-10	0.266159	0.854	0.728	2.00911e-06
PPIC	1.12083e-10	0.309567	0.824	0.751	2.03464e-06
TNNI1	1.16113e-10	0.327711	1	0.959	2.1078e-06
NGFRAP1	1.37679e-10	0.692858	0.346	0.193	2.4993e-06
MPC1	1.46902e-10	0.258043	0.751	0.577	2.66672e-06
DLAT	1.47739e-10	0.294966	0.704	0.568	2.68191e-06
TP53INP2	1.5548e-10	0.309479	0.724	0.584	2.82243e-06
ANAPC16	1.85682e-10	0.30948	0.864	0.796	3.37069e-06
EFHA1	2.01966e-10	0.250169	0.262	0.126	3.6663e-06
CLSTN1	2.17919e-10	0.329671	0.711	0.606	3.95588e-06
ALPK3	2.49078e-10	0.273485	0.797	0.628	4.52151e-06
APP	2.58945e-10	0.280321	0.94	0.892	4.70063e-06
ETFB	2.807e-10	0.255117	0.807	0.647	5.09554e-06
SMYD1	2.86809e-10	0.254479	0.914	0.668	5.20645e-06
MXI1	3.06729e-10	0.32698	0.658	0.512	5.56804e-06
PABPC4	3.26991e-10	0.265751	0.877	0.822	5.93587e-06
ABHD13	3.58826e-10	0.265322	0.535	0.376	6.51376e-06
ST3GAL1	3.65916e-10	0.281916	0.804	0.656	6.64248e-06
TRIM24	3.89562e-10	0.296164	0.85	0.776	7.07173e-06
LOC401397	3.95716e-10	0.256349	0.282	0.141	7.18344e-06
MIR133A1HG	4.79842e-10	0.273974	0.349	0.191	8.71058e-06
MAGI2-AS3	4.98798e-10	0.27101	0.89	0.806	9.05467e-06
TNKS2	5.0486e-10	0.284935	0.754	0.637	9.16473e-06
TMEM41A	5.11519e-10	0.27342	0.631	0.483	9.28561e-06
KIDINS220	5.22817e-10	0.306713	0.854	0.795	9.49069e-06
TRAK2	6.19469e-10	0.259701	0.502	0.339	1.12452e-05
TRPM7	6.19992e-10	0.326968	0.674	0.578	1.12547e-05
MRPL15	6.82777e-10	0.298315	0.804	0.68	1.23945e-05
CNIH	9.95263e-10	0.257609	0.282	0.143	1.8067e-05
NDUFB4	1.01765e-09	0.280876	0.94	0.881	1.84734e-05
VDAC3	1.02338e-09	0.280511	0.884	0.819	1.85775e-05
CAMK2G	1.11509e-09	0.263654	0.595	0.452	2.02422e-05
SSPN	1.15313e-09	0.303605	0.588	0.439	2.09327e-05
COX17	1.19874e-09	0.310337	0.787	0.703	2.17607e-05
PFKP	1.32823e-09	0.261907	0.944	0.79	2.41114e-05
SPTBN1	1.34366e-09	0.254785	0.97	0.944	2.43915e-05
CRIP2	1.549e-09	0.266648	0.97	0.848	2.81191e-05
RNPC3	1.63939e-09	0.307712	0.714	0.579	2.97598e-05
EIF4EBP2	1.70169e-09	0.258656	0.87	0.818	3.08909e-05
BBX	1.82288e-09	0.298096	0.824	0.746	3.30907e-05
MSRB3	1.82742e-09	0.302429	0.817	0.712	3.31731e-05
STK39	1.94973e-09	0.305792	0.711	0.564	3.53935e-05
TOM1L2	2.00043e-09	0.296494	0.734	0.625	3.63138e-05
BAG3	2.04311e-09	0.313383	0.724	0.63	3.70885e-05
ABCC5	2.55888e-09	0.254295	0.708	0.548	4.64514e-05
FAT1	2.73874e-09	0.265445	0.771	0.665	4.97164e-05
AFF3	3.18769e-09	0.313406	0.442	0.293	5.78661e-05
MLL5	3.24228e-09	0.327853	0.286	0.152	5.88571e-05
CSNK1E	3.27258e-09	0.275486	0.292	0.155	5.94071e-05
NDUFS2	3.53093e-09	0.321028	0.874	0.819	6.4097e-05
ATP2B1	5.30577e-09	0.273166	0.764	0.631	9.63156e-05
B3GALNT1	6.03243e-09	0.312683	0.605	0.461	0.000109507
KIF13A	7.28683e-09	0.266916	0.831	0.766	0.000132278
PHKB	8.11742e-09	0.266041	0.777	0.683	0.000147356
CD47	9.07646e-09	0.259428	0.751	0.609	0.000164765
CES2	9.7033e-09	0.301163	0.674	0.557	0.000176144
TMEM106B	9.90508e-09	0.25959	0.814	0.77	0.000179807
FH	1.04247e-08	0.262646	0.645	0.519	0.000189239
DCAF11	2.07883e-08	0.269302	0.651	0.521	0.00037737
PGAM1	2.33687e-08	0.253544	0.807	0.691	0.000424211
MGEA5	2.60744e-08	0.320838	0.854	0.805	0.000473329
NGRN	3.85887e-08	0.257081	0.857	0.803	0.0007005
NLK	9.54587e-08	0.257745	0.478	0.362	0.00173286
CDS2	9.65717e-08	0.268321	0.728	0.668	0.00175307
WBP2	1.02912e-07	0.251404	0.831	0.765	0.00186817
SMAD2	1.23002e-07	0.252266	0.787	0.694	0.00223286
RAB12	1.66468e-07	0.279846	0.515	0.403	0.00302189
EFR3A	2.16191e-07	0.270475	0.658	0.561	0.00392452
HNRPDL	2.30815e-07	0.309169	0.339	0.19	0.00418998
LINC00657	3.43902e-07	0.256724	0.306	0.175	0.00624285
KIFAP3	3.74699e-07	0.288603	0.761	0.694	0.0068019
PDK2	3.81809e-07	0.265566	0.741	0.635	0.00693098
ASB2	4.05088e-07	0.251976	0.435	0.297	0.00735356
BZW1	4.07993e-07	0.257316	0.85	0.841	0.0074063
MAB21L3	4.82609e-07	0.350803	0.754	0.696	0.00876079
SERPINB6	9.05542e-07	0.258364	0.724	0.617	0.0164383
UGDH-AS1	1.49189e-06	0.484647	0.641	0.552	0.0270822
UBE2E3	1.50114e-06	0.350753	0.545	0.445	0.0272502
MLL	1.70002e-06	0.267676	0.259	0.151	0.0308605
ANKRD26	2.869e-06	0.259607	0.701	0.581	0.052081
CTBP2	4.44611e-06	0.265475	0.734	0.691	0.0807103
MAPRE2	5.45615e-06	0.260653	0.625	0.548	0.0990455
PPP3CA	5.96065e-06	0.322953	0.661	0.561	0.108204
SEMA3C	6.95066e-06	0.279515	0.551	0.431	0.126175
ATPIF1	1.35224e-05	0.25273	0.89	0.852	0.245472
PGM5P2	2.09184e-05	0.359967	0.316	0.216	0.379731
LOC100131257	4.28932e-05	0.280689	0.887	0.895	0.77864
SREBF2	0.00019582	0.292191	0.734	0.74	1
MALAT1	0.000463175	0.252581	0.997	0.999	1
SRGAP2B	0.000874819	0.329064	0.495	0.472	1
NPTN-IT1	0.00136866	0.322979	0.458	0.407	1
PLPP3	0.00994173	0.29323	0.482	0.462	1
CTSV	0.0116126	0.26154	0.432	0.394	1
KCNQ1OT1	0.0350066	0.254314	0.973	0.973	1

## Sheet: cluster2
	p_val	avg_log2FC	pct.1	pct.2	p_val_adj
MYL3	1.67357e-83	1.75873	0.935	0.436	3.03803e-79		as shown in Figure 7
LDB3	4.11452e-83	1.385	1	0.67	7.46909e-79
CSRP3	2.72793e-78	1.85244	0.972	0.594	4.95201e-74
MYBPC3	1.94064e-77	1.28165	0.996	0.638	3.52285e-73
SORBS2	4.06841e-77	1.40213	1	0.8	7.38538e-73
MYH7	7.66514e-76	2.58973	0.822	0.349	1.39145e-71
LMOD2	2.27137e-74	1.3534	0.595	0.127	4.12322e-70
IRX4	4.69843e-72	0.553556	0.296	0.015	8.52906e-68
MYOZ2	3.04106e-71	1.1395	0.98	0.574	5.52044e-67
HSPB7	4.10384e-71	1.14221	1	0.884	7.4497e-67
NEBL	6.50552e-71	1.25157	0.996	0.795	1.18095e-66
AKAP6	8.88744e-71	0.703106	0.713	0.195	1.61334e-66
TNNC1	1.53803e-70	1.21857	1	0.761	2.79198e-66
ACTN2	1.32238e-69	1.23931	0.992	0.764	2.40052e-65
XIRP1	8.04184e-66	1.18269	0.915	0.462	1.45984e-61
PDE4DIP	3.30296e-62	0.923284	0.951	0.611	5.99587e-58
LRRC10	3.55397e-62	1.02462	0.919	0.451	6.45152e-58
BVES	6.95793e-62	1.00307	0.883	0.431	1.26307e-57
SYNPO2L	8.70484e-62	1.37477	0.919	0.51	1.58019e-57
RCAN2	3.29922e-61	0.926527	0.907	0.446	5.98908e-57
MYL4	7.18735e-58	1.09182	0.996	0.772	1.30472e-53
ACTC1	2.16393e-57	1.129	1	1	3.92818e-53
MYH7B	5.47466e-55	0.723881	0.822	0.323	9.93816e-51
PLCXD3	7.78364e-54	0.642175	0.672	0.216	1.41296e-49
NKX2-5	2.70511e-53	0.750197	0.931	0.416	4.91058e-49
NAV1	4.66273e-52	1.32057	0.789	0.375	8.46426e-48
PLN	1.27592e-50	1.10946	1	0.771	2.31618e-46
QKI	1.01136e-49	0.726704	0.996	0.933	1.83592e-45
SIPA1L2	3.03078e-49	0.819971	0.98	0.76	5.50177e-45
ENO3	2.69902e-48	0.803945	0.96	0.607	4.89954e-44
FHOD3	4.86513e-48	0.79639	0.907	0.55	8.83166e-44
SPON1	1.3554e-46	0.740072	0.672	0.243	2.46045e-42
FAM78A	3.46178e-46	0.645653	0.826	0.386	6.28417e-42
SLC8A1	8.757e-46	0.901501	1	0.804	1.58966e-41
TRIM55	1.68384e-45	0.722497	0.935	0.557	3.05668e-41
TNNT2	2.13116e-45	0.892028	1	0.979	3.86869e-41
NREP	2.89222e-45	0.869965	1	0.963	5.25025e-41
TTN	5.64914e-45	1.0094	1	0.978	1.02549e-40
POPDC3	6.06863e-44	0.696257	0.826	0.411	1.10164e-39
TNNI1	3.40879e-43	0.687162	1	0.96	6.18798e-39
CKM	5.2062e-43	0.990984	0.951	0.628	9.45081e-39
NEXN	6.27943e-43	0.779583	0.988	0.755	1.13991e-38
CACNA1C	8.80964e-43	0.605614	0.802	0.378	1.59921e-38
A4GALT	2.0464e-42	0.309854	0.356	0.066	3.71482e-38
LAMA4	1.06264e-41	0.495978	0.437	0.106	1.92901e-37
TRIM63	1.12889e-41	0.390829	0.599	0.194	2.04928e-37
ERBB4	1.27208e-41	0.826717	0.866	0.538	2.3092e-37
VCAM1	3.75728e-41	0.646335	0.579	0.184	6.82058e-37
CRYAB	4.20772e-41	0.848082	0.98	0.804	7.63827e-37
MT-RNR2	1.1022e-40	0.659881	1	1	2.00083e-36
MYL7	2.3171e-40	0.974995	1	0.974	4.20623e-36
PARM1	4.79046e-40	0.432411	0.538	0.167	8.69611e-36
CORIN	7.9592e-40	0.778544	0.834	0.429	1.44483e-35
WEE1	5.53334e-39	0.701874	0.964	0.734	1.00447e-34
HSPB1	1.14344e-38	0.719577	1	0.999	2.07569e-34
EIF1B	2.38409e-38	0.778098	0.972	0.82	4.32784e-34
SLC25A4	4.54843e-38	0.687531	1	0.871	8.25676e-34
A2M	6.17864e-38	0.97092	0.773	0.391	1.12161e-33
USP28	1.59084e-37	0.635382	0.887	0.58	2.88785e-33
MLIP	3.00995e-37	0.546928	0.87	0.479	5.46396e-33
C12orf75	2.17427e-36	0.604225	0.725	0.361	3.94696e-32
MYOCD	3.55124e-36	0.648999	0.874	0.508	6.44657e-32
TSC22D1	4.5302e-36	0.71692	0.996	0.909	8.22367e-32
MT-RNR1	2.33428e-35	0.633511	1	0.999	4.23743e-31
APOBEC2	3.62273e-35	0.566652	0.899	0.466	6.57634e-31
MYOM1	4.41824e-35	0.710206	0.984	0.703	8.02044e-31
LINC00881	4.76993e-35	0.430661	0.449	0.131	8.65886e-31
ALPK2	1.63728e-34	0.679399	0.939	0.689	2.97216e-30
RBM24	1.64649e-34	0.667004	0.96	0.665	2.98887e-30
TMEM71	2.45119e-34	0.40163	0.328	0.07	4.44965e-30
SMYD1	3.15892e-34	0.656972	0.96	0.669	5.7344e-30
CPNE5	4.32057e-34	0.538219	0.713	0.305	7.84314e-30
PDLIM5	1.33137e-33	0.642228	1	0.965	2.41684e-29
PFKP	2.8072e-33	0.602837	0.98	0.789	5.09592e-29
ALPK3	3.93142e-33	0.662109	0.903	0.617	7.13671e-29
CTNNA3	4.15056e-33	0.482327	0.664	0.292	7.53451e-29
TXLNB	5.58326e-33	0.348708	0.377	0.097	1.01353e-28
CLIC5	6.03728e-33	0.476719	0.623	0.264	1.09595e-28
FHL2	6.72234e-33	0.780305	0.907	0.601	1.22031e-28
HSPB3	7.79091e-33	0.575879	0.874	0.467	1.41428e-28
MB	9.43466e-33	0.742095	0.895	0.51	1.71267e-28
KLHL41	1.06196e-32	0.632584	0.96	0.596	1.92778e-28
PDK1	1.94706e-32	0.615743	0.964	0.699	3.5345e-28
XPO4	2.03915e-32	0.668644	0.919	0.594	3.70166e-28
PPP1R14C	7.41067e-32	0.52097	0.709	0.342	1.34526e-27
ADPRHL1	7.76459e-32	0.641302	0.911	0.558	1.40951e-27
XPR1	9.06754e-32	0.651266	0.887	0.603	1.64603e-27
FBN2	2.19405e-31	0.76084	0.923	0.695	3.98285e-27
SRL	2.43502e-31	0.449278	0.583	0.231	4.42029e-27
PPP1R3C	4.29048e-31	0.632133	0.87	0.531	7.78851e-27
FABP3	8.96257e-31	0.562421	0.899	0.565	1.62697e-26
SMPX	1.31328e-30	0.636771	0.947	0.637	2.384e-26
CRIP2	1.46759e-30	0.577751	0.988	0.849	2.66411e-26
BMP2	2.07728e-30	1.22968	0.818	0.528	3.77088e-26
ADM	2.36024e-30	0.579484	0.559	0.226	4.28455e-26
TCAP	2.56169e-30	0.512078	0.591	0.248	4.65023e-26
HSPB2	2.99967e-30	0.490538	0.648	0.289	5.4453e-26
MT-CO2	2.40279e-29	0.386546	1	1	4.36178e-25
NPPA	2.67729e-29	1.8116	0.668	0.354	4.86008e-25
LAMA2	8.42814e-29	0.56306	0.915	0.597	1.52996e-24
EMILIN2	9.75461e-29	0.450341	0.757	0.397	1.77075e-24
AHNAK2	1.01669e-28	0.451023	0.445	0.146	1.8456e-24
RYR2	2.79943e-28	0.610718	0.988	0.779	5.08181e-24
COX6A2	4.79313e-28	0.418328	0.482	0.175	8.70098e-24
PRKAA2	5.73608e-28	0.533917	0.87	0.558	1.04127e-23
TRDN	1.11594e-27	0.578975	0.992	0.649	2.02577e-23
CAV1	1.51704e-27	0.505263	0.684	0.337	2.75388e-23
AGL	2.01942e-27	0.529534	0.858	0.613	3.66586e-23
EDNRA	3.90588e-27	0.547169	0.887	0.561	7.09034e-23
SVIL	4.49724e-27	0.553329	0.988	0.787	8.16383e-23
MYLK3	1.06213e-26	0.559356	0.81	0.466	1.92808e-22
FAM189A2	1.30476e-26	0.662995	0.814	0.494	2.36854e-22
MYO18B	1.315e-26	0.486213	0.761	0.462	2.38712e-22
MT-CYB	1.85979e-26	0.335294	1	1	3.37608e-22
SYTL5	3.69106e-26	0.359101	0.522	0.206	6.70038e-22
PALM2	6.52826e-26	0.498868	0.749	0.413	1.18508e-21
LMO7	1.47738e-25	0.525494	0.862	0.576	2.68188e-21
CYFIP2	1.64118e-24	0.545653	0.814	0.485	2.97924e-20
CORO6	1.76472e-24	0.497653	0.826	0.527	3.2035e-20
ABRA	2.73758e-24	0.5143	0.304	0.084	4.96953e-20
ANKRD1	4.48522e-24	1.11104	0.502	0.222	8.14202e-20
MTUS1	4.89214e-24	0.627168	0.858	0.59	8.88071e-20
RNF115	6.37944e-24	0.459468	0.729	0.437	1.15806e-19
MT-ND4	8.61841e-24	0.3299	1	1	1.5645e-19
RBM38	9.64229e-24	0.51896	0.903	0.652	1.75036e-19
PGM5	2.63524e-23	0.334361	0.595	0.274	4.78375e-19
RNF207	3.75181e-23	0.384421	0.721	0.387	6.81066e-19
ZFP36L1	5.90028e-23	0.575229	0.992	0.984	1.07108e-18
ATP13A3	7.3878e-23	0.570289	0.939	0.767	1.34111e-18
LRRC49	7.70208e-23	0.314683	0.401	0.144	1.39816e-18
MT-ATP8	7.73569e-23	0.45499	1	0.995	1.40426e-18
TMOD1	1.24104e-22	0.394032	0.87	0.513	2.25287e-18
MT-ATP6	1.25077e-22	0.302883	1	1	2.27053e-18
RBM20	2.47356e-22	0.465744	0.745	0.432	4.49025e-18
IDH3A	3.07722e-22	0.424976	0.789	0.5	5.58608e-18
MAN1C1	4.02135e-22	0.442973	0.64	0.322	7.29996e-18
AKR1B1	5.00303e-22	0.591606	0.838	0.605	9.08201e-18
MASP1	8.94141e-22	0.55051	0.555	0.267	1.62313e-17
MT-ND5	1.86384e-21	0.436241	1	1	3.38342e-17
LOC101928433	2.21128e-21	0.407408	0.453	0.193	4.01413e-17
UNC45B	2.5779e-21	0.451901	0.935	0.615	4.67966e-17
ICA1	2.82205e-21	0.378742	0.664	0.364	5.12287e-17
REEP1	3.07585e-21	0.34499	0.769	0.429	5.58358e-17
MT-CO3	3.9606e-21	0.306621	1	1	7.18967e-17
MYL2	5.01844e-21	0.514553	0.154	0.024	9.10997e-17
RBPMS2	5.96012e-21	0.437612	0.968	0.787	1.08194e-16
ITGB1BP2	8.4423e-21	0.340544	0.745	0.418	1.53253e-16
AFAP1L1	8.60844e-21	0.330264	0.652	0.345	1.56269e-16
PRSS35	1.0009e-20	0.461052	0.757	0.473	1.81693e-16
CADPS	1.59034e-20	0.371097	0.709	0.372	2.88694e-16
RRAD	1.64167e-20	0.452147	0.842	0.523	2.98013e-16
ABLIM1	2.10434e-20	0.463186	0.968	0.84	3.82002e-16
ISOC1	3.32989e-20	0.527554	0.696	0.443	6.04476e-16
PKP2	3.36213e-20	0.472546	0.947	0.779	6.10328e-16
EEF1A2	3.374e-20	0.455329	0.891	0.626	6.12482e-16
IRX3	3.54093e-20	0.274713	0.421	0.159	6.42786e-16
GPRIN3	6.76105e-20	0.250497	0.377	0.139	1.22733e-15
MT-ND4L	8.65135e-20	0.488286	0.996	0.978	1.57048e-15
S1PR1	1.17808e-19	0.304813	0.498	0.221	2.13857e-15
PKIG	1.26077e-19	0.728264	0.761	0.53	2.28867e-15
MT-CO1	1.26086e-19	0.406171	1	1	2.28883e-15
MDH1	1.61167e-19	0.43945	0.996	0.914	2.92566e-15
ZAK	1.67158e-19	0.394508	0.968	0.824	3.03443e-15
COX5A	1.70327e-19	0.416468	0.98	0.932	3.09195e-15
KCNMB4	1.83592e-19	0.370574	0.688	0.395	3.33274e-15
PTPN21	2.84391e-19	0.445891	0.753	0.487	5.16254e-15
RHOQ	2.96917e-19	0.45092	0.939	0.778	5.38993e-15
TRIM54	5.98416e-19	0.269403	0.526	0.248	1.0863e-14
GOT1	6.37021e-19	0.371966	0.951	0.733	1.15638e-14
USP2	6.39219e-19	0.305366	0.611	0.314	1.16037e-14
STK39	7.3365e-19	0.40677	0.818	0.551	1.33179e-14
SLC20A2	7.50735e-19	0.386197	0.802	0.535	1.36281e-14
SPHKAP	7.52545e-19	0.432684	0.931	0.625	1.3661e-14
JPH2	7.71447e-19	0.273896	0.587	0.299	1.40041e-14
COL2A1	7.84458e-19	0.5056	0.976	0.821	1.42403e-14
PPP2R3A	8.72996e-19	0.394511	0.903	0.652	1.58475e-14
TMEM56	1.61806e-18	0.343861	0.607	0.333	2.93727e-14
CMYA5	1.81173e-18	0.497093	0.939	0.727	3.28884e-14
TIMP3	1.86293e-18	0.378318	0.931	0.666	3.38178e-14
RAPGEF2	2.46911e-18	0.391957	0.729	0.466	4.48217e-14
TCEA3	3.90608e-18	0.37791	0.834	0.515	7.09071e-14
POPDC2	4.58856e-18	0.286298	0.951	0.652	8.32962e-14
SIPA1L1	5.97145e-18	0.393603	0.615	0.353	1.084e-13
DMD	8.42531e-18	0.433344	0.862	0.602	1.52945e-13
NES	1.09262e-17	0.464264	0.955	0.784	1.98343e-13
LEFTY2	1.31685e-17	0.756067	0.385	0.16	2.39047e-13
FXYD6	2.24522e-17	0.433232	0.943	0.716	4.07574e-13
BZW2	2.6093e-17	0.386923	0.931	0.82	4.73666e-13
SNTA1	3.0731e-17	0.363062	0.883	0.647	5.57861e-13
LGR4	4.05167e-17	0.516806	0.806	0.561	7.355e-13
PPP1R1A	5.51331e-17	0.442699	0.919	0.649	1.00083e-12
OBSCN	5.97592e-17	0.366856	0.688	0.42	1.08481e-12
MT-ND2	6.52568e-17	0.288972	1	1	1.18461e-12
KDR	7.63331e-17	0.279953	0.368	0.148	1.38567e-12
CREM	8.94012e-17	0.341114	0.769	0.534	1.6229e-12
MDH2	1.28115e-16	0.354793	0.96	0.836	2.32567e-12
FAM134B	1.49412e-16	0.281207	0.514	0.262	2.71228e-12
UNC5B-AS1	2.76117e-16	0.31887	0.287	0.102	5.01235e-12
AP1S2	3.11895e-16	0.363425	0.765	0.544	5.66183e-12
PTPRD	3.45982e-16	0.428826	0.976	0.81	6.28061e-12
CITED4	4.35698e-16	0.412144	0.733	0.454	7.90923e-12
FILIP1	4.88663e-16	0.418142	0.874	0.672	8.8707e-12
CYCS	5.11726e-16	0.353291	0.996	0.909	9.28937e-12
SORD	5.733e-16	0.465686	0.628	0.41	1.04071e-11
NGFR	5.78229e-16	0.309708	0.304	0.111	1.04966e-11
PPM1K	5.96537e-16	0.444968	0.883	0.676	1.08289e-11
SLC30A3	6.07365e-16	0.263874	0.672	0.376	1.10255e-11
MTRNR2L1	8.55906e-16	0.390263	0.968	0.827	1.55373e-11
PYROXD2	9.22432e-16	0.263592	0.409	0.186	1.67449e-11
ANKH	9.69342e-16	0.357498	0.547	0.301	1.75965e-11
SLC15A2	1.07854e-15	0.269747	0.259	0.089	1.95788e-11
CACNB2	1.2734e-15	0.298172	0.749	0.467	2.3116e-11
ADGRL3	1.27427e-15	0.285433	0.417	0.19	2.31318e-11
SOD2	1.70726e-15	0.324772	0.87	0.66	3.09919e-11
TNNI3	1.91072e-15	0.569608	0.781	0.555	3.46853e-11
TBX2	2.34775e-15	0.322675	0.607	0.346	4.26187e-11
DPYSL3	2.9057e-15	0.577972	0.915	0.771	5.27472e-11
FLNC	5.7281e-15	0.436502	0.919	0.755	1.03982e-10
MTUS2	6.10151e-15	0.322773	0.842	0.585	1.10761e-10
CFL2	6.28421e-15	0.379938	0.955	0.846	1.14077e-10
PKIA	7.55194e-15	0.371281	0.802	0.538	1.3709e-10
CRIP1	7.95363e-15	0.315542	0.725	0.471	1.44382e-10
NPPB	1.20892e-14	0.769032	0.146	0.033	2.19456e-10
DUSP5	1.23808e-14	0.293119	0.502	0.262	2.24749e-10
EHD3	1.50545e-14	0.331288	0.563	0.332	2.73284e-10
VCAN	1.53238e-14	0.544199	0.988	0.87	2.78172e-10
ATP5G3	1.72375e-14	0.284751	1	0.984	3.12913e-10
SEMA6D	2.19784e-14	0.448233	0.68	0.473	3.98974e-10
CPEB4	2.38696e-14	0.334352	0.895	0.635	4.33305e-10
TNFRSF12A	2.53589e-14	0.468262	0.599	0.363	4.6034e-10
HACD1	2.70598e-14	0.373258	0.688	0.454	4.91216e-10
ATF3	2.73852e-14	0.53153	0.316	0.135	4.97124e-10
CASZ1	2.91787e-14	0.252307	0.664	0.395	5.29681e-10
UGP2	3.22288e-14	0.351503	0.972	0.882	5.8505e-10
STARD4	3.55039e-14	0.399375	0.632	0.408	6.44503e-10
CDH2	4.01825e-14	0.339721	0.972	0.821	7.29433e-10
LPCAT4	5.24574e-14	0.344802	0.652	0.422	9.52259e-10
SAMD4A	6.0483e-14	0.386074	0.741	0.514	1.09795e-09
CITED2	8.49455e-14	0.262894	0.696	0.43	1.54202e-09
MACF1	1.98501e-13	0.34463	0.968	0.882	3.60339e-09
ATP5A1	2.21611e-13	0.272615	0.996	0.982	4.0229e-09
CCDC69	2.22764e-13	0.250215	0.757	0.473	4.04383e-09
ASB2	2.39586e-13	0.26768	0.526	0.286	4.34921e-09
COX7B	2.7102e-13	0.287609	0.992	0.944	4.91983e-09
HOPX	3.61914e-13	0.350767	0.271	0.106	6.56982e-09
TSPAN9	4.00432e-13	0.276117	0.676	0.449	7.26904e-09
KLHL24	4.61298e-13	0.344987	0.866	0.659	8.37395e-09
GPI	5.41929e-13	0.299142	0.988	0.885	9.83763e-09
VEGFA	5.50718e-13	0.341997	0.846	0.655	9.99718e-09
HAND2	5.96901e-13	0.35714	0.964	0.785	1.08355e-08
COL18A1	6.19773e-13	0.368609	0.984	0.913	1.12507e-08
TNFRSF19	6.6948e-13	0.372035	0.652	0.418	1.21531e-08
FITM1	6.82469e-13	0.324138	0.822	0.55	1.23889e-08
MSRB3	7.04262e-13	0.32811	0.899	0.702	1.27845e-08
KIF26B	9.74357e-13	0.265107	0.733	0.475	1.76875e-08
COX6C	1.07719e-12	0.28811	0.996	0.955	1.95542e-08
AFG3L2	1.5485e-12	0.324783	0.806	0.616	2.81099e-08
CHCHD10	1.68049e-12	0.315603	0.951	0.757	3.0506e-08
WNK1	2.14157e-12	0.384793	0.907	0.822	3.8876e-08
SEPW1	2.40915e-12	0.258486	1	0.967	4.37333e-08
DPF3	3.36851e-12	0.265878	0.591	0.349	6.11486e-08
TNK2	3.60171e-12	0.320753	0.64	0.427	6.53818e-08
TACC2	4.12205e-12	0.273969	0.692	0.456	7.48275e-08
MITF	4.23807e-12	0.303687	0.858	0.62	7.69337e-08
NAMPT	4.94465e-12	0.258899	0.692	0.47	8.97603e-08
MEF2A	6.10602e-12	0.325808	0.96	0.832	1.10843e-07
NDUFS6	7.23544e-12	0.302156	0.923	0.804	1.31345e-07
PRKAG2	8.71489e-12	0.263238	0.761	0.519	1.58201e-07
HECA	9.08489e-12	0.272619	0.668	0.445	1.64918e-07
LRRFIP1	1.15111e-11	0.288922	0.927	0.798	2.08961e-07
SATB1	1.22942e-11	0.255488	0.676	0.433	2.23176e-07
PALLD	1.82714e-11	0.293434	0.984	0.896	3.31681e-07
SLC1A3	2.44522e-11	0.277079	0.652	0.417	4.43881e-07
SMAD6	3.41435e-11	0.385865	0.862	0.656	6.19806e-07
GPC1	4.35743e-11	0.264152	0.781	0.583	7.91005e-07
BEX1	4.62693e-11	0.352836	0.935	0.767	8.39926e-07
CNN1	4.71069e-11	0.36892	0.737	0.538	8.55131e-07
RSPO3	4.77388e-11	0.636291	0.563	0.382	8.66603e-07
ANXA6	4.87519e-11	0.263374	0.968	0.865	8.84993e-07
MRAS	5.05482e-11	0.283375	0.765	0.555	9.17602e-07
C20orf166-AS1	5.63267e-11	0.266967	0.725	0.493	1.0225e-06
PGM1	5.91543e-11	0.261057	0.899	0.702	1.07383e-06
PRICKLE1	9.38809e-11	0.316624	0.81	0.601	1.70422e-06
CCDC34	9.91604e-11	0.348844	0.453	0.269	1.80006e-06
MYH6	1.15634e-10	0.38721	0.947	0.762	2.09911e-06
DLD	1.18907e-10	0.273483	0.883	0.749	2.15851e-06
GAB1	1.30933e-10	0.269286	0.802	0.633	2.37683e-06
SLC25A12	1.83116e-10	0.250432	0.818	0.601	3.32411e-06
LAPTM4B	1.85236e-10	0.259128	1	0.971	3.36259e-06
AFF1	2.11378e-10	0.266083	0.798	0.596	3.83714e-06
FAM162A	2.21277e-10	0.290342	0.874	0.746	4.01683e-06
RTN4	2.536e-10	0.251378	0.988	0.973	4.6036e-06
MT-ND6	2.66058e-10	0.350873	0.806	0.651	4.82975e-06
OXCT1	2.67737e-10	0.254804	0.709	0.511	4.86024e-06
PPP1R12B	4.53474e-10	0.371541	0.955	0.762	8.23191e-06
BNIP3	4.99228e-10	0.364633	0.907	0.809	9.06248e-06
MPC1	6.43751e-10	0.256094	0.769	0.58	1.1686e-05
LDHA	1.00282e-09	0.359817	0.972	0.942	1.82043e-05
TAB2	1.62035e-09	0.284858	0.862	0.756	2.94141e-05
FIGN	3.50827e-09	0.273769	0.717	0.521	6.36857e-05
GOLIM4	4.02107e-09	0.289583	0.891	0.723	7.29945e-05
RAB9B	4.47356e-09	0.266252	0.478	0.298	8.12085e-05
GYG1	5.56425e-09	0.345693	0.854	0.749	0.000101008
CAP2	5.72342e-09	0.267825	0.96	0.854	0.000103897
JMJD1C	6.35079e-09	0.259185	0.899	0.748	0.000115286
MT-TK	6.82476e-09	0.27789	0.834	0.689	0.00012389
GOLGA8A	8.04171e-09	0.278973	0.713	0.523	0.000145981
KDM6A	8.89759e-09	0.308671	0.64	0.485	0.000161518
CKB	1.26646e-08	0.250442	0.83	0.629	0.0002299
HSPB8	4.24721e-08	0.279588	0.704	0.536	0.000770996
DCBLD2	5.87983e-08	0.284436	0.891	0.764	0.00106737
DOK4	8.20715e-08	0.276462	0.935	0.781	0.00148984
DLC1	1.33683e-07	0.255046	0.696	0.518	0.00242675
HIPK3	3.75296e-07	0.254516	0.866	0.768	0.00681275
DKK3	4.26342e-07	0.264959	0.858	0.738	0.00773938
ID2	5.05016e-07	0.271689	0.923	0.791	0.00916755
CNOT11	6.7764e-07	0.256951	0.506	0.366	0.0123012
ACTA1	4.77353e-05	1.0803	0.255	0.154	0.866538
RNA28S5	0.00239325	0.253298	0.279	0.199	1
TFPI2	0.011315	0.276543	0.134	0.083	1
DHRS9	0.663827	0.586068	0.3	0.286	1

## Sheet: cluster3
	p_val	avg_log2FC	pct.1	pct.2	p_val_adj
PRR16	1.7144e-53	0.808778	0.537	0.133	3.11215e-49		as shown in Figure 7
DHRS9	1.87733e-50	1.53429	0.662	0.235	3.40793e-46
SLC22A17	7.22944e-39	0.983259	0.894	0.663	1.31236e-34
MAP1B	2.52517e-37	1.01695	1	0.916	4.58394e-33
PPFIA2	4.07862e-36	0.791331	0.597	0.223	7.40392e-32
GPM6B	7.94019e-35	0.412211	0.403	0.101	1.44138e-30
SERPINF1	2.89452e-33	0.98229	0.819	0.529	5.25441e-29
C7	6.05469e-33	2.20205	0.579	0.254	1.09911e-28
CKB	5.45787e-30	0.849098	0.87	0.627	9.90766e-26
GATM	7.88098e-30	1.45245	0.75	0.469	1.43063e-25
PCDH7	5.88176e-29	0.990544	0.944	0.842	1.06772e-24
SPOCK1	3.63332e-28	0.637713	0.495	0.187	6.59557e-24
PTCHD1	6.24439e-26	0.46927	0.259	0.055	1.13354e-21
EFS	1.56122e-24	0.877467	0.676	0.399	2.83408e-20
ACTA2	1.60445e-24	1.00938	0.773	0.508	2.91256e-20
VEGFA	3.72166e-23	0.779819	0.856	0.657	6.75592e-19
PDLIM3	7.06906e-23	0.897395	0.856	0.626	1.28325e-18
RFTN1	7.84571e-23	0.628088	0.657	0.366	1.42423e-18
FAM20A	1.31641e-22	0.390158	0.264	0.066	2.38968e-18
LSAMP	1.16717e-21	0.54982	0.769	0.448	2.11876e-17
FOXC1	2.04915e-21	0.49609	0.486	0.206	3.71982e-17
COBL	2.47361e-21	0.257843	0.269	0.07	4.49035e-17
LMO2	2.57294e-21	0.29701	0.255	0.062	4.67066e-17
LIMCH1	4.63246e-20	0.575457	0.755	0.472	8.40931e-16
SFRP5	9.23915e-20	0.744814	0.537	0.259	1.67718e-15
FHL1	9.93046e-20	0.713581	0.824	0.621	1.80268e-15
TUBA1A	1.6791e-19	0.614317	0.944	0.817	3.04807e-15
SGK1	3.02898e-19	0.664803	0.412	0.17	5.49851e-15
TGFB2	5.24602e-18	0.525008	0.722	0.477	9.52311e-14
A2M	2.61638e-17	1.17108	0.653	0.416	4.74951e-13
AKAP12	4.41798e-17	0.69662	0.792	0.586	8.01996e-13
DES	5.34833e-17	0.710413	0.736	0.492	9.70882e-13
PITX2	6.34996e-17	0.705439	0.491	0.254	1.15271e-12
PKDCC	1.40969e-16	0.604402	0.764	0.552	2.55902e-12
PDE3A	4.34006e-16	0.48861	0.625	0.39	7.87851e-12
BST2	9.49494e-16	0.402945	0.486	0.239	1.72362e-11
CCL21	1.36038e-15	0.435545	0.199	0.053	2.46949e-11
TXNIP	1.66047e-15	0.650334	0.926	0.859	3.01425e-11
COX6A1	1.8007e-15	0.419107	0.991	0.977	3.26882e-11
LRRTM1	2.22047e-15	0.270211	0.333	0.129	4.03081e-11
RGS4	2.50477e-15	1.4507	0.398	0.192	4.54691e-11
PLBD1	2.75528e-15	0.341346	0.435	0.208	5.00166e-11
COL14A1	1.01222e-14	0.584131	0.468	0.228	1.83749e-10
MGARP	1.05713e-14	0.474677	0.597	0.349	1.91901e-10
RNPC3	1.31246e-14	0.425359	0.782	0.577	2.3825e-10
EPS8	2.09628e-14	0.598037	0.574	0.351	3.80538e-10
FBXO32	8.57018e-14	0.676326	0.731	0.538	1.55574e-09
VCAN	9.80237e-14	0.617447	0.954	0.877	1.77942e-09
JAG1	1.28179e-13	0.501033	0.769	0.564	2.32684e-09
WSB1	1.71812e-13	0.523666	0.977	0.96	3.11891e-09
SHOX2	2.83436e-13	0.482267	0.671	0.412	5.14522e-09
PEG10	3.29465e-13	0.987853	0.778	0.61	5.98078e-09
FIBIN	3.41829e-13	0.27401	0.171	0.045	6.20523e-09
CGNL1	3.89315e-13	0.521079	0.889	0.741	7.06724e-09
ROGDI	4.38621e-13	0.434873	0.597	0.398	7.96229e-09
GATA4	4.80497e-13	0.412076	0.935	0.878	8.72246e-09
NFKBIZ	4.83202e-13	0.33861	0.403	0.196	8.77157e-09
VAMP2	5.61239e-13	0.381023	0.949	0.926	1.01882e-08
TNS1	6.96702e-13	0.46212	0.644	0.442	1.26472e-08
FOXP2	8.24056e-13	0.405223	0.306	0.127	1.49591e-08
COX7B	9.68682e-13	0.466394	0.963	0.95	1.75845e-08
FLRT2	1.03949e-12	0.420056	0.801	0.645	1.88698e-08
ZNF385A	1.10246e-12	0.288251	0.528	0.313	2.0013e-08
KCNK3	1.1942e-12	0.346404	0.301	0.129	2.16783e-08
DGKI	1.48427e-12	0.375866	0.514	0.292	2.6944e-08
F2R	1.48598e-12	0.486518	0.505	0.301	2.6975e-08
HK1	3.17188e-12	0.373948	0.926	0.877	5.75791e-08
MAB21L2	5.09172e-12	0.401432	0.375	0.184	9.24299e-08
ZNF83	1.08833e-11	0.495834	0.898	0.854	1.97565e-07
NEURL1B	1.26746e-11	0.258062	0.343	0.164	2.30082e-07
ATP2B1	1.30238e-11	0.518246	0.759	0.639	2.36422e-07
CRHBP	1.36381e-11	0.503836	0.162	0.046	2.47572e-07
MAGI2-AS3	1.60275e-11	0.483365	0.87	0.814	2.90947e-07
LDHB	1.74959e-11	0.46125	0.986	0.979	3.17604e-07
ITGA1	2.12234e-11	0.450882	0.44	0.239	3.85269e-07
ECE1	2.95789e-11	0.344528	0.565	0.359	5.36947e-07
DNAJC15	3.30765e-11	0.754173	0.852	0.745	6.00438e-07
ARG2	4.44644e-11	0.264949	0.273	0.117	8.07163e-07
COL6A1	4.60714e-11	0.402116	0.912	0.874	8.36334e-07
PPP1R12B	4.80765e-11	0.458735	0.917	0.772	8.72733e-07
APCDD1L	5.4654e-11	0.36719	0.199	0.07	9.92134e-07
CALD1	7.15337e-11	0.426461	0.954	0.884	1.29855e-06
PELO	9.32536e-11	0.46422	0.676	0.511	1.69283e-06
CTSV	9.46465e-11	0.603722	0.56	0.378	1.71812e-06
MYLK	9.51035e-11	0.77608	0.255	0.109	1.72641e-06
ENAH	9.58708e-11	0.302632	0.963	0.932	1.74034e-06
MGST3	1.0945e-10	0.357782	0.963	0.942	1.98684e-06
PRDX1	1.16865e-10	0.760725	0.926	0.91	2.12145e-06
LINC00936	1.42741e-10	0.279692	0.319	0.154	2.59117e-06
CLIC4	1.61928e-10	0.49571	0.87	0.85	2.93948e-06
ZCCHC24	1.64514e-10	0.325703	0.829	0.667	2.98643e-06
ZNF385B	1.83932e-10	0.395999	0.676	0.484	3.33892e-06
ACOT13	1.89412e-10	0.379435	0.829	0.749	3.4384e-06
COL27A1	2.26837e-10	0.366679	0.495	0.308	4.11777e-06
TSPAN5	2.57333e-10	0.354365	0.5	0.305	4.67136e-06
DPP7	2.58011e-10	0.429373	0.694	0.539	4.68367e-06
OAZ2	2.71926e-10	0.387715	0.861	0.796	4.93627e-06
VEGFC	2.9495e-10	0.44117	0.579	0.391	5.35423e-06
SLC47A1	2.98705e-10	0.406065	0.458	0.276	5.4224e-06
DACT3	2.99884e-10	0.316967	0.718	0.561	5.4438e-06
ATP5G3	3.03268e-10	0.367127	0.991	0.986	5.50523e-06
FMOD	4.20249e-10	0.377992	0.255	0.107	7.62878e-06
ETV1	4.80538e-10	0.516178	0.704	0.544	8.7232e-06
CNN1	5.02297e-10	0.415518	0.722	0.544	9.1182e-06
PHLDA1	7.68365e-10	0.298789	0.556	0.346	1.39481e-05
SORBS1	8.51942e-10	0.304259	0.431	0.255	1.54653e-05
CADPS2	8.98558e-10	0.413273	0.704	0.525	1.63115e-05
ATP5B	9.27332e-10	0.342545	1	0.983	1.68339e-05
PPARGC1A	1.04028e-09	0.336985	0.718	0.515	1.88842e-05
FYN	1.0436e-09	0.33378	0.764	0.599	1.89445e-05
CLIP3	1.10124e-09	0.323234	0.685	0.493	1.99907e-05
NETO1	1.1658e-09	0.280069	0.282	0.131	2.11628e-05
ITPKB	1.18953e-09	0.26739	0.278	0.129	2.15935e-05
ZNF611	1.32434e-09	0.279174	0.472	0.285	2.40407e-05
VTN	1.49512e-09	0.264344	0.204	0.078	2.71409e-05
LMOD1	1.56094e-09	0.448631	0.426	0.258	2.83357e-05
BTG2	1.65962e-09	0.417717	0.565	0.391	3.01271e-05
MITF	1.66471e-09	0.359361	0.81	0.632	3.02196e-05
ATP2B4	1.86984e-09	0.341759	0.921	0.883	3.39432e-05
SCRG1	2.39161e-09	0.256745	0.356	0.189	4.34149e-05
FLNA	2.49271e-09	0.393981	0.852	0.765	4.52502e-05
RABL6	3.10524e-09	0.349809	0.773	0.698	5.63694e-05
PRKAR2B	3.39069e-09	0.364888	0.644	0.488	6.15512e-05
STC2	3.51994e-09	0.264806	0.347	0.186	6.38975e-05
CADM1	3.68273e-09	0.382333	0.792	0.702	6.68526e-05
PPM1K	3.97406e-09	0.488368	0.819	0.689	7.21411e-05
LGI2	4.03393e-09	0.479854	0.667	0.514	7.32279e-05
SLC7A2	4.78194e-09	0.428643	0.745	0.627	8.68065e-05
CCDC3	5.71361e-09	0.446507	0.412	0.243	0.000103719
PAG1	5.76741e-09	0.393205	0.509	0.342	0.000104696
KLHDC8B	6.44062e-09	0.28824	0.671	0.519	0.000116917
CAP2	6.86866e-09	0.331337	0.912	0.863	0.000124687
NPTN	7.67659e-09	0.321821	0.921	0.871	0.000139353
SNAP25	9.03152e-09	0.270544	0.412	0.237	0.000163949
TDP2	9.12968e-09	0.285052	0.75	0.583	0.000165731
TAGLN	1.00072e-08	0.607984	0.778	0.644	0.000181661
COX5B	1.06599e-08	0.394327	0.944	0.926	0.00019351
TCF21	1.06675e-08	0.423756	0.255	0.12	0.000193647
ATP5A1	1.17383e-08	0.281072	0.991	0.983	0.000213086
VASH1	1.35127e-08	0.386278	0.657	0.473	0.000245296
C1orf21	1.35839e-08	0.329226	0.63	0.451	0.000246588
PLXND1	1.39977e-08	0.328634	0.421	0.258	0.0002541
PPP1R14A	1.57037e-08	0.253561	0.329	0.176	0.000285069
NCAM1	1.7447e-08	0.309712	0.94	0.769	0.000316715
ADCY1	1.82886e-08	0.269308	0.324	0.178	0.000331993
C16orf45	1.85646e-08	0.325721	0.352	0.203	0.000337004
PCDH10	1.99776e-08	0.336559	0.282	0.14	0.000362653
NFIA	2.08126e-08	0.312578	0.708	0.538	0.000377811
CYCS	2.09802e-08	0.330592	0.972	0.914	0.000380853
SERPINB6	2.40498e-08	0.275515	0.741	0.621	0.000436575
SEMA6A	2.5405e-08	0.297282	0.644	0.465	0.000461176
PRDX2	2.54498e-08	0.289577	0.963	0.908	0.000461991
SEMA3A	2.6475e-08	0.446693	0.787	0.666	0.000480601
GATA6	2.7117e-08	0.300153	0.866	0.717	0.000492255
ZFPM2	2.7601e-08	0.323296	0.523	0.361	0.000501041
GRIN2A	3.03253e-08	0.377235	0.338	0.189	0.000550496
MIR100HG	3.1814e-08	0.26947	0.685	0.507	0.00057752
NID2	3.36229e-08	0.298751	0.759	0.615	0.000610356
LRRN3	3.38448e-08	0.400673	0.31	0.165	0.000614385
LHFP	3.79151e-08	0.275656	0.769	0.637	0.000688273
CYB5A	4.29382e-08	0.331271	0.708	0.548	0.000779457
LDHA	4.41386e-08	0.342891	0.977	0.942	0.000801249
BEX1	4.63696e-08	0.483757	0.866	0.781	0.000841748
NR2F1	5.22007e-08	0.389443	0.37	0.221	0.000947599
SIPA1L2	5.51001e-08	0.347324	0.866	0.781	0.00100023
NEAT1	6.46793e-08	0.502885	0.884	0.818	0.00117412
XPO4	6.66332e-08	0.501168	0.741	0.626	0.00120959
TP53INP2	7.03404e-08	0.322205	0.704	0.595	0.00127689
COX6B1	7.36728e-08	0.346436	0.968	0.942	0.00133738
ATP5G1	7.46491e-08	0.393195	0.838	0.735	0.0013551
PRDX6	9.12961e-08	0.31084	0.986	0.958	0.0016573
AQP1	9.73497e-08	0.310097	0.505	0.347	0.00176719
ATP5D	1.0253e-07	0.265899	0.907	0.794	0.00186122
ATP5O	1.03689e-07	0.291817	0.968	0.956	0.00188226
ACTC1	1.18156e-07	0.417563	1	1	0.00214489
NPY6R	1.54066e-07	0.282295	0.278	0.147	0.00279675
ALDOA	1.94e-07	0.275749	0.972	0.948	0.00352167
GSN	2.05615e-07	0.403839	0.769	0.679	0.00373252
PSD3	2.67802e-07	0.279228	0.819	0.705	0.0048614
NDUFA1	2.93234e-07	0.3097	0.935	0.913	0.00532307
RNF19A	2.94846e-07	0.344274	0.667	0.562	0.00535235
APP	3.13218e-07	0.286029	0.935	0.895	0.00568585
THSD7A	3.26211e-07	0.28447	0.593	0.418	0.0059217
PPP2R4	3.68968e-07	0.277885	0.861	0.784	0.00669788
SLC38A2	3.71769e-07	0.322034	0.949	0.948	0.00674871
SOX4	4.40402e-07	0.317331	0.977	0.922	0.00799462
NDRG4	4.8928e-07	0.338403	0.514	0.381	0.00888189
HIGD1A	5.14476e-07	0.251028	0.861	0.783	0.00933929
CCT2	5.5806e-07	0.273628	0.926	0.899	0.0101305
ENO1	6.05951e-07	0.364875	0.991	0.977	0.0109998
ZNF704	6.35323e-07	0.406546	0.745	0.633	0.011533
FOXP4	7.07678e-07	0.29073	0.694	0.574	0.0128465
CHPF	7.25089e-07	0.291052	0.667	0.532	0.0131625
TPI1	7.71481e-07	0.26174	0.981	0.968	0.0140047
TSPAN18	9.80469e-07	0.296476	0.565	0.414	0.0177985
NDUFV2	1.13657e-06	0.265393	0.907	0.863	0.0206322
FZD1	1.14398e-06	0.38815	0.611	0.49	0.0207667
PRAF2	1.17464e-06	0.271034	0.75	0.624	0.0213233
LBH	1.77832e-06	0.274356	0.838	0.716	0.0322818
ECI1	1.9633e-06	0.315065	0.759	0.664	0.0356398
ARL4D	1.97685e-06	0.326909	0.477	0.321	0.0358858
HRC	2.29247e-06	0.25191	0.741	0.566	0.0416151
NDUFC1	2.42579e-06	0.256374	0.912	0.877	0.0440354
C4orf48	2.73572e-06	0.274768	0.657	0.534	0.0496615
MMP15	2.77943e-06	0.252203	0.736	0.611	0.050455
PKM	2.91318e-06	0.255832	0.995	0.983	0.0528829
SPON1	3.0525e-06	0.366952	0.431	0.286	0.055412
ZNF503	3.19595e-06	0.316616	0.708	0.566	0.058016
MAP2	3.1995e-06	0.334824	0.236	0.127	0.0580805
PDLIM7	3.26809e-06	0.303537	0.852	0.769	0.0593257
CDC42EP3	3.35862e-06	0.381927	0.875	0.804	0.060969
LGALS3BP	4.2593e-06	0.267245	0.824	0.741	0.077319
COL6A2	4.34805e-06	0.322786	0.741	0.649	0.0789301
FAM210B	4.36425e-06	0.273151	0.778	0.672	0.0792241
DCP1A	4.5263e-06	0.261729	0.704	0.557	0.0821659
NDUFB4	4.61583e-06	0.273697	0.931	0.885	0.0837911
SLC31A1	4.62348e-06	0.293869	0.556	0.43	0.08393
ALDH1A1	4.83908e-06	0.513587	0.213	0.106	0.0878438
JADE1	5.63863e-06	0.269158	0.477	0.338	0.102358
KCNA5	6.0968e-06	0.272267	0.431	0.283	0.110675
SCD	6.34269e-06	0.270092	0.903	0.834	0.115139
MYOF	6.54157e-06	0.315967	0.556	0.427	0.118749
HTRA1	6.98419e-06	0.32464	0.792	0.662	0.126784
HS2ST1	7.2299e-06	0.274114	0.75	0.614	0.131244
SRPX	8.29742e-06	0.302908	0.551	0.422	0.150623
KCNJ3	8.83137e-06	0.314671	0.435	0.311	0.160316
NFE2L1	9.97345e-06	0.275697	0.755	0.7	0.181048
ZNF761	1.01149e-05	0.257574	0.375	0.261	0.183616
TPM2	1.14042e-05	0.349935	0.907	0.899	0.207021
TMEM185A	1.6599e-05	0.320534	0.667	0.572	0.301322
SCP2	1.66926e-05	0.294435	0.815	0.731	0.303021
CBX6	1.67673e-05	0.290397	0.815	0.763	0.304376
TMX4	1.78021e-05	0.279213	0.782	0.701	0.323162
ATXN1	1.79991e-05	0.282599	0.718	0.633	0.326737
PFKFB3	1.87055e-05	0.270616	0.394	0.273	0.339562
GADD45A	1.95166e-05	0.423554	0.606	0.536	0.354284
TBC1D4	2.00602e-05	0.269504	0.653	0.555	0.364153
TMEM167A	2.05863e-05	0.252592	0.903	0.848	0.373703
RNF150	2.16243e-05	0.276272	0.611	0.489	0.392547
ADCY5	2.51447e-05	0.27764	0.431	0.306	0.456452
GUCY1A3	2.66134e-05	0.293279	0.787	0.7	0.483113
SEMA6D	3.33196e-05	0.336908	0.63	0.484	0.604851
FILIP1	3.33319e-05	0.267998	0.782	0.69	0.605073
AKR1A1	3.50522e-05	0.364647	0.824	0.753	0.636302
GALNT10	4.53597e-05	0.284957	0.38	0.27	0.823414
C1orf122	6.4833e-05	0.262973	0.796	0.712	1
SERPINI1	6.83544e-05	0.264331	0.352	0.235	1
GALC	7.73602e-05	0.25398	0.718	0.606	1
LTBP1	8.53323e-05	0.283588	0.773	0.704	1
PRDX4	8.90435e-05	0.287601	0.718	0.646	1
GABARAPL1	0.000138194	0.320508	0.574	0.48	1
PMP22	0.0001434	0.412355	0.431	0.318	1
CDH11	0.000143858	0.263262	0.542	0.426	1
COL4A6	0.000146684	0.402701	0.806	0.749	1
COL4A5	0.000153667	0.287481	0.94	0.893	1
SH3GLB1	0.000196503	0.329186	0.852	0.838	1
MFAP4	0.000222474	0.263536	0.546	0.453	1
NDUFA4	0.00022636	0.275716	1	0.987	1
RCAN1	0.000253321	0.355812	0.389	0.289	1
MALAT1	0.000278129	0.27983	1	0.998	1
GLI3	0.00030917	0.263522	0.542	0.42	1
TLN2	0.000378884	0.285866	0.606	0.532	1
FABP5	0.000680424	0.783414	0.616	0.516	1
PPP1R3C	0.000747362	0.262515	0.671	0.566	1
LGALSL	0.000766091	0.537499	0.444	0.373	1
RBFOX2	0.000823107	0.267915	0.949	0.935	1
SSPN	0.0008854	0.30308	0.528	0.456	1
CPNE3	0.0012107	0.300783	0.778	0.721	1
SNHG1	0.00123663	0.276174	0.838	0.81	1
MATN2	0.00303648	0.323652	0.579	0.552	1
RGS2	0.0045493	0.298499	0.204	0.138	1
ACTA1	0.0068327	0.461954	0.227	0.16	1
CXCL12	0.00776749	0.284906	0.588	0.512	1
TNNI3	0.0161837	0.4403	0.602	0.586	1
NUDT4	0.0172031	0.266359	0.546	0.491	1
NRP2	0.0201169	0.266849	0.421	0.369	1
KCTD12	0.0223242	0.626535	0.509	0.512	1
GOLIM4	0.024728	0.278444	0.778	0.743	1
THBS4	0.0973391	0.292913	0.157	0.123	1
RGS5	0.138486	0.45067	0.639	0.64	1
DKK1	0.153883	0.632455	0.347	0.327	1
MOXD1	0.173588	0.315541	0.245	0.229	1
H19	0.764793	0.745033	0.361	0.357	1
CDKN1A	0.837289	0.252803	0.255	0.263	1
CXCL14	0.887188	0.60376	0.093	0.1	1

## Sheet: cluster4
	p_val	avg_log2FC	pct.1	pct.2	p_val_adj
IRX5	2.824e-77	1.20222	0.724	0.086	5.12641e-73		as shown in Figure 7
IRX3	2.85695e-76	1.61377	0.897	0.159	5.18622e-72
CNTN5	1.79728e-70	0.810583	0.517	0.041	3.26261e-66
FGF18	1.1104e-44	0.938699	0.713	0.148	2.0157e-40
VCAM1	5.55599e-41	1.11954	0.793	0.211	1.00858e-36
GRIA4	1.48728e-37	0.830777	0.448	0.066	2.69987e-33
FBN2	5.02581e-37	1.74179	0.989	0.714	9.12336e-33
GJA3	1.02013e-35	1.0512	0.885	0.327	1.85183e-31
MSX1	1.41283e-34	0.712821	0.402	0.057	2.56471e-30
PRDM16	5.41886e-34	0.364066	0.356	0.043	9.83685e-30
ATP1B1	1.21785e-33	1.46254	0.989	0.767	2.21077e-29
ATP1A1	7.56852e-30	1.3926	0.954	0.826	1.37391e-25
NKX2-5	7.72078e-30	1.11056	0.977	0.464	1.40155e-25
LBH	1.2167e-29	1.49831	0.977	0.718	2.20868e-25
CRNDE	5.70431e-29	0.911833	0.736	0.269	1.0355e-24
MPPED2	1.56405e-28	1.03575	0.908	0.483	2.83922e-24
SEMA6B	1.53214e-26	0.327447	0.483	0.101	2.7813e-22
XPO4	4.89733e-24	1.10823	0.931	0.625	8.89012e-20
CCDC85A	1.36634e-23	0.466762	0.402	0.082	2.48031e-19
MEIS2	3.87797e-23	0.890902	0.966	0.729	7.03968e-19
ROBO2	5.26583e-21	0.536707	0.483	0.131	9.55907e-17
POSTN	6.14108e-21	0.721294	0.437	0.106	1.11479e-16
KIF1A	8.05892e-21	0.440816	0.448	0.115	1.46294e-16
ZNF503	3.30665e-20	1.01724	0.92	0.566	6.00256e-16
IRX2	3.84777e-20	0.38851	0.402	0.092	6.98486e-16
KDR	4.72965e-20	0.625638	0.529	0.161	8.58573e-16
CYP27A1	3.00697e-19	0.41584	0.506	0.147	5.45855e-15
DACH1	1.15117e-18	0.355252	0.598	0.202	2.08971e-14
LOC283683	2.05716e-18	0.41747	0.54	0.177	3.73436e-14
SNCA	2.15034e-18	0.594896	0.655	0.268	3.90351e-14
LIX1	1.02731e-17	0.736911	0.77	0.372	1.86488e-13
IRX1	5.15407e-17	0.34667	0.172	0.021	9.35619e-13
DACT1	1.14844e-16	0.543662	0.667	0.279	2.08476e-12
CADM2	1.21598e-16	0.251592	0.161	0.018	2.20737e-12
KCNG1	1.41919e-16	1.10162	0.494	0.163	2.57625e-12
FRZB	1.75859e-16	0.336942	0.356	0.089	3.19237e-12
DYNC1I1	2.07269e-16	0.356261	0.402	0.111	3.76255e-12
MSX2	4.29448e-16	0.653241	0.644	0.271	7.79577e-12
RADIL	7.4719e-16	0.352651	0.471	0.149	1.35637e-11
APCDD1	9.34032e-16	0.295533	0.322	0.073	1.69555e-11
SSR3	1.31984e-15	0.73971	0.943	0.8	2.3959e-11
TBX2	5.03682e-15	0.809646	0.724	0.365	9.14333e-11
MECOM	7.17601e-15	0.387706	0.483	0.159	1.30266e-10
CORIN	8.06711e-15	0.867981	0.828	0.469	1.46442e-10
ID1	2.00967e-14	0.801158	0.805	0.461	3.64816e-10
FHL2	2.31598e-14	0.977707	0.931	0.63	4.20421e-10
HOXB4	3.52358e-14	0.343329	0.425	0.135	6.39636e-10
STC2	1.16181e-13	0.473839	0.506	0.19	2.10903e-09
FAM189A2	1.32339e-13	0.970355	0.782	0.527	2.40236e-09
EPHB3	1.36916e-13	0.544069	0.747	0.422	2.48544e-09
ABCA1	1.82573e-13	0.585562	0.782	0.41	3.31425e-09
CD24	2.01551e-13	0.847751	0.356	0.108	3.65876e-09
SLC22A23	2.49569e-13	0.379425	0.506	0.186	4.53043e-09
GOLIM4	3.39763e-13	0.85753	0.92	0.738	6.16772e-09
RGS5	4.98385e-13	1.2442	0.897	0.626	9.04718e-09
NAV1	7.78025e-13	0.641308	0.77	0.417	1.41235e-08
BMP2	1.05932e-12	0.953424	0.839	0.555	1.92298e-08
WNT5B	1.22009e-12	0.276518	0.368	0.114	2.21483e-08
FGFR1	1.26441e-12	0.572823	0.816	0.489	2.29529e-08
SYNPO2	1.51488e-12	0.780018	0.839	0.512	2.74996e-08
C14orf132	2.3943e-12	0.602042	0.632	0.315	4.34637e-08
LMO2	2.72157e-12	0.905782	0.287	0.076	4.94046e-08
DOK4	2.91925e-12	0.682567	0.954	0.795	5.29932e-08
BST2	3.32432e-12	0.405681	0.586	0.254	6.03463e-08
UACA	3.79651e-12	0.586612	0.862	0.594	6.89181e-08
FOXP2	5.91169e-12	0.754069	0.391	0.137	1.07315e-07
MT-ND1	6.26834e-12	0.33451	1	1	1.13789e-07
FOXP1	6.66485e-12	0.532717	0.966	0.856	1.20987e-07
ID4	7.00715e-12	0.70324	0.816	0.513	1.27201e-07
UNC5B	7.45578e-12	0.537747	0.977	0.801	1.35345e-07
NUDT4	8.43565e-12	0.59587	0.793	0.483	1.53132e-07
CRABP2	1.0261e-11	0.599275	0.874	0.503	1.86267e-07
LOC100506548	1.55967e-11	0.51603	0.931	0.692	2.83127e-07
SORBS2	1.68048e-11	0.526044	0.989	0.82	3.05058e-07
DLK1	2.05517e-11	1.07669	0.276	0.075	3.73075e-07
PLAT	2.14283e-11	0.85173	0.437	0.169	3.88988e-07
VCAN	2.35714e-11	0.828451	0.989	0.881	4.27891e-07
LINC00173	2.73235e-11	0.349688	0.54	0.235	4.96003e-07
MT-ND2	3.51432e-11	0.413894	1	1	6.37955e-07
HOXB2	4.46439e-11	0.542421	0.655	0.353	8.10422e-07
FBXO18	4.72854e-11	0.504294	0.851	0.671	8.58372e-07
RDX	5.47267e-11	0.471013	0.989	0.881	9.93454e-07
MT-ND3	5.87984e-11	0.34821	1	1	1.06737e-06
LHFPL2	6.83665e-11	0.472582	0.839	0.563	1.24106e-06
ATP13A3	7.66514e-11	0.573709	0.943	0.784	1.39145e-06
PBX1	8.05213e-11	0.605198	0.989	0.914	1.4617e-06
CHN1	8.183e-11	0.548654	0.563	0.288	1.48546e-06
NRXN1	8.47328e-11	0.596324	0.701	0.384	1.53815e-06
NAP1L1	9.29294e-11	0.390226	1	0.994	1.68695e-06
LRRC10	9.66041e-11	0.550911	0.828	0.502	1.75365e-06
FXYD6	9.91435e-11	0.539437	0.908	0.74	1.79975e-06
TSC22D3	2.03059e-10	0.422752	0.632	0.352	3.68614e-06
CADPS2	2.08737e-10	0.512473	0.851	0.531	3.78921e-06
EXTL3	2.61703e-10	0.622511	0.77	0.524	4.7507e-06
C11orf96	4.8996e-10	0.346407	0.264	0.077	8.89424e-06
DUSP26	5.56741e-10	0.324054	0.506	0.234	1.01065e-05
MB	6.71382e-10	0.553382	0.862	0.549	1.21876e-05
BAMBI	6.77524e-10	0.594164	0.989	0.889	1.22991e-05
MT-CO3	1.00712e-09	0.341094	1	1	1.82823e-05
WNK2	1.15918e-09	0.435268	0.747	0.461	2.10425e-05
RBM38	1.23648e-09	0.584785	0.874	0.678	2.24457e-05
TLE2	1.29581e-09	0.324068	0.667	0.351	2.35228e-05
PNISR	1.41592e-09	0.468244	0.954	0.923	2.57032e-05
PRUNE2	1.59942e-09	0.36142	0.46	0.206	2.90343e-05
ENO2	1.70278e-09	0.450941	0.632	0.346	3.09106e-05
MMP15	1.81795e-09	0.458067	0.874	0.614	3.30013e-05
ZFHX4	1.90263e-09	0.368095	0.437	0.19	3.45384e-05
GRAMD1B	1.98957e-09	0.28162	0.253	0.074	3.61167e-05
PPM1K	2.37271e-09	0.743116	0.897	0.695	4.30718e-05
GSE1	3.79817e-09	0.431965	0.805	0.582	6.89482e-05
TNNI1	3.98166e-09	0.464003	1	0.964	7.2279e-05
C4orf3	4.06826e-09	0.449516	0.977	0.866	7.38512e-05
SCRG1	4.55504e-09	0.267108	0.46	0.197	8.26876e-05
SEMA6D	4.59066e-09	0.394618	0.782	0.487	8.33343e-05
PYGM	5.49449e-09	0.434592	0.678	0.389	9.97415e-05
SLC1A4	6.18244e-09	0.353202	0.425	0.184	0.00011223
LTBP1	6.52351e-09	0.449073	0.92	0.702	0.000118421
UBE2L6	7.90661e-09	0.465985	0.655	0.402	0.000143529
WNT2	1.15077e-08	0.250785	0.287	0.094	0.000208899
TMEM56	1.23783e-08	0.370173	0.632	0.359	0.000224703
AXIN2	1.56647e-08	0.360731	0.425	0.2	0.00028436
TCEA3	1.83571e-08	0.361196	0.839	0.546	0.000333237
CDKN1C	1.87391e-08	0.626283	0.92	0.754	0.000340172
NAV2	2.18407e-08	0.574358	0.759	0.547	0.000396474
GLI3	2.23243e-08	0.343214	0.701	0.422	0.000405254
ALPK2	2.63265e-08	0.552573	0.897	0.716	0.000477905
SST	3.02585e-08	0.918799	0.172	0.042	0.000549283
HRC	3.04431e-08	0.388105	0.828	0.575	0.000552634
ISOC1	3.52369e-08	0.448616	0.713	0.467	0.000639655
MT-ND4	3.61088e-08	0.291394	1	1	0.000655483
UNC5C	3.67204e-08	0.364633	0.46	0.218	0.000666585
SLC11A2	4.03919e-08	0.330211	0.701	0.448	0.000733234
SMAD9	4.07082e-08	0.37399	0.805	0.53	0.000738976
TSPAN18	5.68219e-08	0.431207	0.69	0.42	0.00103149
RNF208	5.71753e-08	0.264469	0.759	0.439	0.0010379
IFITM1	5.76388e-08	0.46829	0.713	0.427	0.00104632
ID2	6.0489e-08	0.524808	0.966	0.802	0.00109806
SRSF11	7.74325e-08	0.601417	0.977	0.934	0.00140563
HNRNPU-AS1	8.72152e-08	0.278792	0.299	0.112	0.00158322
ST3GAL6	9.95167e-08	0.43014	0.655	0.418	0.00180653
NGFR	1.17802e-07	0.556352	0.322	0.129	0.00213845
FZD3	1.33963e-07	0.473619	0.759	0.533	0.00243182
DCP1A	1.76687e-07	0.574442	0.77	0.565	0.00320741
BCO2	1.85732e-07	0.282034	0.46	0.227	0.00337159
HIGD1A	1.9311e-07	0.456017	0.92	0.786	0.00350552
ZNF704	2.03681e-07	0.479705	0.851	0.636	0.00369742
TMEM245	2.05334e-07	0.434961	0.966	0.878	0.00372743
CCNB1IP1	2.14743e-07	0.430927	0.943	0.808	0.00389823
KIAA1462	2.39701e-07	0.271363	0.345	0.148	0.0043513
NFATC2	2.60706e-07	0.325599	0.517	0.272	0.00473259
ID3	2.90357e-07	0.561938	0.908	0.688	0.00527085
TBC1D1	3.43427e-07	0.408675	0.713	0.52	0.00623423
LUC7L3	3.85506e-07	0.35394	0.989	0.929	0.00699808
AK1	4.22566e-07	0.352	0.851	0.637	0.00767083
NFATC4	5.33692e-07	0.310865	0.655	0.413	0.00968812
TGFB2	5.48292e-07	0.464135	0.724	0.496	0.00995314
ODAM	5.85115e-07	0.283792	0.103	0.02	0.0106216
CACNA1G	5.86571e-07	0.27326	0.425	0.206	0.010648
MEIS1	6.782e-07	0.308099	0.621	0.399	0.0123114
ANGPT1	7.04503e-07	0.450911	0.54	0.3	0.0127888
SMCR7L	7.07321e-07	0.272492	0.31	0.126	0.01284
TBX2-AS1	8.25923e-07	0.295745	0.333	0.15	0.014993
EIF4A2	9.87676e-07	0.271753	1	0.976	0.0179293
H2AFY	1.00284e-06	0.413732	0.966	0.895	0.0182045
FOXP4	1.07039e-06	0.294857	0.793	0.578	0.0194308
EMILIN2	1.11646e-06	0.345024	0.678	0.437	0.0202671
DAB2IP	1.12993e-06	0.325113	0.736	0.509	0.0205117
AHCYL1	1.71682e-06	0.33967	0.931	0.793	0.0311654
TSC22D1	1.72268e-06	0.539433	0.989	0.918	0.0312718
LPHN1	1.89475e-06	0.284389	0.333	0.145	0.0343954
ZMYM2	1.93059e-06	0.31435	0.954	0.79	0.035046
CYFIP2	2.11602e-06	0.298079	0.782	0.519	0.038412
TXNIP	2.13914e-06	0.390247	0.989	0.861	0.0388318
CBFA2T2	2.25033e-06	0.298799	0.724	0.503	0.0408503
CRYL1	2.37982e-06	0.283053	0.46	0.254	0.0432009
C20orf166-AS1	2.74693e-06	0.299711	0.77	0.513	0.0498651
PYGB	2.92127e-06	0.36867	0.747	0.582	0.0530299
ZFHX3	3.60978e-06	0.428538	0.885	0.757	0.0655283
H1F0	3.64911e-06	0.383351	0.805	0.611	0.0662423
MYOM1	3.73218e-06	0.476228	0.931	0.734	0.0677503
C17orf76-AS1	3.9796e-06	0.553658	0.391	0.2	0.0722418
TMEM41A	4.7191e-06	0.315535	0.701	0.499	0.0856658
CADPS	4.82248e-06	0.255442	0.667	0.407	0.0875425
HSPB7	4.96558e-06	0.368075	0.989	0.896	0.0901402
MICAL2	5.43655e-06	0.321412	0.908	0.768	0.0986898
WSB1	5.47695e-06	0.365544	0.966	0.962	0.0994231
SLC6A8	5.76186e-06	0.277819	0.529	0.299	0.104595
PRDX2	5.82748e-06	0.291864	0.989	0.911	0.105786
SMTNL2	5.86445e-06	0.366268	0.759	0.545	0.106457
MYLIP	5.88135e-06	0.557925	0.632	0.44	0.106764
RND2	6.35321e-06	0.289755	0.586	0.361	0.11533
EEF1A2	6.48324e-06	0.34115	0.897	0.652	0.11769
CPNE5	7.24248e-06	0.278236	0.586	0.351	0.131473
FHOD3	7.41527e-06	0.313633	0.816	0.589	0.134609
MTSS1	7.49076e-06	0.383893	0.632	0.407	0.13598
LRRC16A	8.08764e-06	0.284327	0.563	0.374	0.146815
SC5DL	9.41315e-06	0.433893	0.31	0.152	0.170877
HNRPDL	9.76492e-06	0.641883	0.391	0.207	0.177263
LOC100507217	1.01362e-05	0.311326	0.333	0.162	0.184002
PDXP	1.13389e-05	0.268163	0.632	0.433	0.205836
EFNB3	1.16116e-05	0.340158	0.816	0.66	0.210785
PURB	1.16663e-05	0.351011	0.92	0.772	0.211778
SEC62	1.32287e-05	0.334214	0.977	0.862	0.24014
MTR	1.35861e-05	0.348905	0.77	0.608	0.246629
LGMN	1.38825e-05	0.306982	0.816	0.654	0.252009
FREM2	1.43322e-05	0.384206	0.805	0.572	0.260172
CCDC141	1.46602e-05	0.388874	0.816	0.583	0.266126
PPP1R13B	1.49167e-05	0.284265	0.644	0.428	0.270783
MAGEF1	1.51076e-05	0.32247	0.908	0.74	0.274249
C12orf23	1.5235e-05	0.320139	0.333	0.156	0.276561
DGKI	1.56966e-05	0.312693	0.529	0.308	0.284941
ZMIZ1	1.59199e-05	0.312457	0.851	0.683	0.288993
MASP1	1.66412e-05	0.290708	0.529	0.297	0.302088
AMHR2	1.75677e-05	0.266719	0.506	0.313	0.318907
UBE2E1	1.79745e-05	0.274774	0.805	0.635	0.326291
NGLY1	1.93833e-05	0.263298	0.644	0.462	0.351866
MDH2	2.08518e-05	0.331495	0.954	0.849	0.378522
AHNAK2	2.08902e-05	0.427018	0.356	0.18	0.379219
EMILIN1	2.1062e-05	0.253515	0.379	0.191	0.382339
CREM	2.1842e-05	0.401179	0.736	0.558	0.396497
ABAT	2.25005e-05	0.313762	0.609	0.401	0.408452
DDX24	2.46533e-05	0.279458	0.931	0.819	0.447532
ESRRG	2.7744e-05	0.250984	0.678	0.429	0.503637
ZSCAN18	2.95596e-05	0.288474	0.77	0.609	0.536595
GNB2L1	3.02677e-05	0.824316	0.379	0.211	0.549449
FLJ45340	3.12306e-05	0.252157	0.322	0.158	0.566929
SH3PXD2A	3.2565e-05	0.269748	0.678	0.51	0.591153
HSPA5	3.25658e-05	0.373017	0.977	0.954	0.591166
SPHKAP	3.47556e-05	0.440652	0.816	0.661	0.630919
MLF1	3.60029e-05	0.292663	0.736	0.515	0.65356
FXYD1	3.62448e-05	0.292462	0.678	0.487	0.657953
SERPINI1	3.82289e-05	0.337817	0.425	0.241	0.693969
NDRG2	4.17505e-05	0.28151	0.839	0.67	0.757898
TMOD1	4.18001e-05	0.313748	0.77	0.553	0.758798
TTN	4.27234e-05	0.353095	1	0.98	0.775557
PPP1R3B	4.48593e-05	0.264272	0.701	0.51	0.814331
C9orf123	4.66048e-05	0.334307	0.368	0.192	0.846016
TET1	4.83687e-05	0.260942	0.655	0.452	0.878037
NGFRAP1	4.89738e-05	0.590865	0.391	0.21	0.889021
HIF3A	4.90681e-05	0.251796	0.862	0.723	0.890733
CLCN3	4.97532e-05	0.305366	0.805	0.589	0.903169
YARS	5.31209e-05	0.262217	0.782	0.57	0.964304
RALGAPA1	5.99146e-05	0.275836	0.586	0.423	1
ECI1	6.0547e-05	0.274283	0.828	0.668	1
ABCC5	6.08182e-05	0.297621	0.759	0.566	1
CHSY1	6.53897e-05	0.358434	0.77	0.602	1
NREP	6.62395e-05	0.31809	0.989	0.968	1
TESC	6.98475e-05	0.357167	0.575	0.4	1
CACNB2	8.07532e-05	0.256195	0.736	0.495	1
LEPREL4	8.19762e-05	0.281578	0.287	0.145	1
TSPYL2	8.33629e-05	0.299594	0.448	0.276	1
GATA5	8.45962e-05	0.256575	0.517	0.334	1
LOC100498859	8.5128e-05	0.252203	0.195	0.077	1
STK17A	8.55599e-05	0.271939	0.379	0.214	1
EIF3E	8.76991e-05	0.263063	0.989	0.954	1
SHISA2	9.30722e-05	0.369254	0.632	0.39	1
FAM115A	9.41087e-05	0.344707	0.345	0.178	1
NEBL	9.47337e-05	0.360354	0.989	0.815	1
BDH2	0.000100975	0.319935	0.874	0.675	1
LINC00881	0.000110111	0.27792	0.322	0.169	1
KCNH2	0.00012016	0.254368	0.724	0.516	1
ADAMTS19	0.000125094	0.273804	0.563	0.371	1
KCNIP4	0.000137194	0.252518	0.494	0.304	1
PSD3	0.000143396	0.300687	0.897	0.71	1
MTFR1L	0.000162178	0.284857	0.759	0.615	1
MT-TL1	0.00016233	0.290011	0.724	0.549	1
CELF1	0.000174905	0.258855	0.92	0.856	1
ADCY5	0.000174973	0.300586	0.494	0.312	1
NHP2L1	0.000185054	0.315678	0.345	0.183	1
VAMP2	0.000186501	0.285625	0.966	0.927	1
KLHDC8B	0.0001973	0.260618	0.69	0.53	1
ENAH	0.000207861	0.344548	0.977	0.933	1
ASNS	0.000213208	0.2532	0.517	0.36	1
PDLIM5	0.000213374	0.321278	1	0.968	1
SEMA6A	0.000223394	0.353995	0.678	0.477	1
CRIP2	0.000233043	0.269872	0.954	0.864	1
HAMP	0.000254542	0.281025	0.391	0.225	1
TNFRSF19	0.000265457	0.339254	0.632	0.442	1
HERPUD1	0.000286696	0.292508	0.655	0.503	1
PTPRD	0.000295997	0.343245	0.92	0.829	1
CDC14B	0.000302791	0.313891	0.713	0.557	1
SLC25A36	0.000307093	0.273629	0.874	0.789	1
CXXC4	0.000321367	0.257037	0.655	0.465	1
ABLIM1	0.000324847	0.260873	0.966	0.853	1
RHOBTB3	0.000365447	0.254342	0.989	0.952	1
COL18A1	0.000370282	0.321129	0.977	0.92	1
ZNFX1-AS1	0.000382515	0.327641	0.322	0.178	1
ARHGAP31	0.000383451	0.257428	0.724	0.538	1
SEMA3A	0.000413487	0.307417	0.805	0.675	1
RASSF4	0.000434173	0.260784	0.517	0.373	1
NRD1	0.00046827	0.298642	0.345	0.193	1
PLD3	0.000474631	0.254845	0.966	0.902	1
AMD1	0.000705458	0.253857	0.667	0.542	1
DARS	0.000717689	0.272503	0.908	0.836	1
MLL	0.000756284	0.273836	0.299	0.163	1
PCM1	0.000875977	0.256023	0.92	0.822	1
TSPAN9	0.000890447	0.251255	0.632	0.473	1
HAND2	0.000901296	0.252334	0.966	0.803	1
PKD1P1	0.000934986	0.289203	0.333	0.196	1
ATP2B4	0.000963276	0.252512	0.966	0.883	1
LINC00657	0.000981408	0.300905	0.333	0.191	1
EIF2S2	0.00101032	0.356849	0.897	0.814	1
FAM162A	0.00115122	0.257482	0.885	0.758	1
ATPIF1	0.00135169	0.252419	0.908	0.856	1
KCNQ1OT1	0.00138309	0.317121	0.989	0.973	1
COL6A1	0.00157679	0.323201	0.943	0.875	1
WNK1	0.00162365	0.262763	0.92	0.83	1
HIPK3	0.00172989	0.298931	0.897	0.776	1
ELL2	0.00199459	0.288742	0.655	0.488	1
MAB21L3	0.00222052	0.28282	0.759	0.703	1
UBR4	0.00327724	0.257853	0.897	0.833	1
GATA6-AS1	0.00361523	0.27628	0.517	0.401	1
PLEKHA5	0.00419166	0.251337	0.805	0.697	1
USP33	0.00421388	0.269905	0.805	0.718	1
BTG2	0.0042286	0.468514	0.529	0.406	1
RBBP4	0.00425321	0.268433	0.667	0.583	1
HMBOX1	0.00492393	0.301284	0.644	0.576	1
RGS4	0.00526033	0.727956	0.322	0.213	1
CREG1	0.00871785	0.36516	0.621	0.574	1
CECR1	0.00899274	0.250161	0.517	0.402	1
RPS18	0.00961193	0.553658	0.69	0.651	1
FRMD3	0.0116408	0.266245	0.448	0.326	1
TRH	0.0145734	0.264292	0.655	0.552	1
FILIP1	0.014579	0.253765	0.77	0.698	1
SOX11	0.0252704	0.318917	0.621	0.525	1
FTL	0.0378045	0.264645	0.989	0.97	1
MIR100HG	0.0439238	0.260854	0.609	0.525	1
SEMA3D	0.0554849	0.267411	0.333	0.243	1
PEG10	0.613537	0.27722	0.632	0.631	1

## Sheet: cluster5
	p_val	avg_log2FC	pct.1	pct.2	p_val_adj
PLAC9	1.40543e-218	1.65846	0.868	0.052	2.55128e-214		as shown in Figure 7 - figure supplement 1
SBSPON	6.70471e-195	2.47314	0.944	0.113	1.21711e-190
ALDH1A2	9.55913e-175	2.41261	0.817	0.079	1.73527e-170
COL9A3	5.22293e-170	2.07621	0.949	0.145	9.48118e-166
TNNT1	1.34829e-169	2.02244	0.919	0.141	2.44755e-165
SMOC2	3.75231e-161	1.3772	0.812	0.087	6.81158e-157
GJA1	8.94393e-150	2.20492	0.883	0.138	1.62359e-145
PKHD1L1	6.81046e-142	0.830067	0.538	0.021	1.2363e-137
CPNE7	1.67663e-136	0.727898	0.472	0.012	3.04359e-132
RARRES2	4.32835e-133	1.01188	0.629	0.048	7.85726e-129
MARCH1	7.19036e-131	0.725896	0.482	0.016	1.30527e-126
PODXL	5.39301e-128	2.20885	0.878	0.203	9.78992e-124
COL26A1	2.63574e-127	0.982965	0.624	0.056	4.78465e-123
ADAM33	7.8341e-127	1.46374	0.802	0.127	1.42212e-122
CARNS1	5.46526e-122	0.949724	0.675	0.073	9.92109e-118
ADAMTS5	2.54419e-120	1.35397	0.711	0.087	4.61847e-116
SOX6	8.72337e-119	1.25494	0.792	0.132	1.58355e-114
ADAM12	1.70336e-118	1.0683	0.599	0.051	3.09211e-114
ACKR3	1.12206e-112	1.31124	0.68	0.092	2.03688e-108
GABRA1	1.17009e-111	0.644505	0.365	0.006	2.12407e-107
TBX18	1.59334e-111	2.25396	0.959	0.339	2.89239e-107
BNC1	2.07467e-110	1.7504	0.843	0.193	3.76616e-106
HEY2	2.44509e-110	1.15181	0.675	0.086	4.43856e-106
APLP1	1.23777e-108	1.5531	0.914	0.268	2.24693e-104
WT1	3.48594e-108	0.765295	0.538	0.043	6.32802e-104
MYRF	2.79582e-103	2.16028	0.99	0.716	5.07526e-99
NCCRP1	3.08178e-102	1.48239	0.868	0.232	5.59435e-98
GUCY1A2	3.5163e-102	1.17722	0.787	0.155	6.38314e-98
LRP2	4.82557e-101	1.60375	0.807	0.206	8.75987e-97
S100A10	9.51598e-101	2.28519	0.99	0.506	1.72744e-96
ITGA3	5.57687e-100	1.73187	0.878	0.291	1.01237e-95
RPL7	5.06792e-99	1.52498	1	0.997	9.1998e-95
PDPN	6.26119e-96	1.2561	0.772	0.177	1.13659e-91
ELMO1	4.18718e-95	1.23106	0.635	0.099	7.60099e-91
C1orf168	1.45316e-94	0.520102	0.325	0.007	2.63792e-90
NTN1	2.70655e-94	0.660713	0.386	0.018	4.91321e-90
IGFBP5	2.35321e-93	2.63032	0.985	0.747	4.27179e-89
C2orf40	1.40284e-92	0.530798	0.457	0.034	2.54658e-88
MN1	1.2976e-91	1.12832	0.711	0.138	2.35553e-87
TMEM151A	1.50663e-91	0.401782	0.35	0.012	2.73499e-87
RPL7A	2.6854e-91	1.16145	1	0.999	4.87481e-87
FRAS1	4.69994e-91	1.70938	0.954	0.572	8.5318e-87
IPO5P1	7.50412e-91	1.78114	0.807	0.252	1.36222e-86
JPH4	1.2454e-90	0.660238	0.503	0.046	2.26077e-86
GALNT9	5.4381e-90	0.314935	0.299	0.005	9.87177e-86
CNTNAP4	3.59856e-88	0.765207	0.34	0.013	6.53247e-84
LAMA3	4.08958e-88	0.414743	0.315	0.009	7.42381e-84
CFI	1.04854e-87	0.425794	0.35	0.014	1.90341e-83
LAMA5	1.59461e-87	1.50712	0.985	0.847	2.89469e-83
ASPHD1	5.02488e-87	0.414217	0.365	0.018	9.12166e-83
ITLN1	3.77918e-86	1.94437	0.467	0.045	6.86035e-82
TMEM98	5.58489e-86	1.68633	0.964	0.683	1.01383e-81
MARCKS	3.43379e-85	1.99987	0.99	0.667	6.23335e-81
KRT18	4.34796e-85	2.25276	0.964	0.681	7.89285e-81
KRT8	6.81985e-84	1.90764	1	0.912	1.23801e-79
C1QL1	7.21394e-84	0.807089	0.533	0.069	1.30955e-79
SLC9A3R1	7.96946e-83	1.69792	0.772	0.231	1.4467e-78
LOC646762	3.06499e-82	1.83843	0.914	0.473	5.56387e-78
C3orf70	9.5152e-82	0.728725	0.569	0.085	1.72729e-77
PLS3	1.04305e-81	1.42394	0.954	0.495	1.89345e-77
RPL37	4.81833e-81	1.23609	1	0.998	8.74671e-77
RPL34	5.38108e-81	1.18508	1	0.999	9.76828e-77
RPL13	6.38741e-81	1.03124	1	0.997	1.15951e-76
DSC3	1.33824e-80	1.07618	0.812	0.227	2.42932e-76
STMN3	1.6078e-80	0.702605	0.579	0.09	2.91864e-76
RPS7	7.5489e-80	1.01309	1	0.999	1.37035e-75
AGRN	1.95152e-79	1.42904	0.954	0.551	3.5426e-75
RPL35A	4.13742e-79	1.06468	1	0.997	7.51066e-75
IFITM2	4.32691e-79	1.42136	0.995	0.824	7.85465e-75
UCHL1	1.9208e-78	1.70291	0.954	0.595	3.48682e-74
EDN1	2.81932e-78	0.798846	0.518	0.067	5.11791e-74
VIM	3.86425e-78	1.61845	0.995	0.869	7.01478e-74
IFITM3	1.42076e-77	1.45038	1	0.953	2.57911e-73
MYCN	1.64878e-77	1.48318	0.802	0.253	2.99304e-73
LOX	2.8402e-77	0.951787	0.579	0.09	5.15582e-73
IGFBP3	3.45472e-77	1.84193	0.817	0.238	6.27136e-73
COLEC12	3.73127e-77	0.638989	0.584	0.096	6.77337e-73
GLS	9.20197e-77	1.42703	0.954	0.661	1.67043e-72
RPL11	8.35699e-76	1.00466	1	0.996	1.51705e-71
RPS6	1.56296e-75	1.12188	1	0.999	2.83724e-71
GPM6A	4.5252e-75	0.753233	0.584	0.101	8.21459e-71
PLEKHH2	5.43405e-75	0.39782	0.365	0.026	9.86442e-71
SARAF	5.73976e-75	2.24404	0.898	0.661	1.04194e-70
CDON	6.42769e-75	1.15795	0.685	0.164	1.16682e-70
SCNN1G	7.89252e-75	0.396037	0.279	0.009	1.43273e-70
RPS23	8.66115e-75	0.973684	1	0.999	1.57226e-70
RPL10A	1.28342e-74	0.945152	1	0.999	2.3298e-70
LAMC1	5.30151e-73	1.50429	0.98	0.921	9.62383e-69
RPL41	2.50484e-72	0.938997	1	1	4.54703e-68
RPL6	2.61005e-72	0.945051	1	0.996	4.73802e-68
RPS3A	2.88094e-72	0.912163	1	0.999	5.22976e-68
RPL18A	8.08774e-72	0.938923	1	0.999	1.46817e-67
RPL38	1.30088e-71	1.00203	1	0.993	2.3615e-67
OLFML1	3.18043e-71	0.471085	0.376	0.032	5.77343e-67
C1orf198	4.43674e-71	1.41629	0.954	0.716	8.05401e-67
RHPN2	1.21237e-70	0.894916	0.685	0.181	2.20081e-66
SMPD3	2.10662e-70	0.302067	0.228	0.003	3.82414e-66
RPS29	2.92573e-70	1.11068	1	0.996	5.31107e-66
ACTG1	3.01242e-70	1.41245	1	0.983	5.46845e-66
RPL10	3.61226e-70	0.903301	1	1	6.55733e-66
FAM131B	4.29484e-70	0.358951	0.325	0.02	7.79642e-66
RPL32	5.38641e-70	0.999086	1	0.995	9.77795e-66
NXPH2	7.19962e-70	1.06054	0.761	0.236	1.30695e-65
RPS3	7.28521e-70	0.957508	1	0.991	1.32248e-65
FXYD7	9.25896e-70	0.519784	0.421	0.046	1.68078e-65
RDH10	2.27331e-69	1.68369	0.919	0.449	4.12674e-65
CSDC2	2.52253e-69	0.636488	0.604	0.119	4.57915e-65
BICDL1	2.75821e-69	0.33999	0.279	0.012	5.00698e-65
TLL1	3.98116e-69	0.495036	0.32	0.02	7.227e-65
HHIP	4.85318e-69	0.45878	0.259	0.009	8.80997e-65
RPS8	8.06779e-69	0.950389	0.995	0.998	1.46455e-64
PRDX6	1.46453e-68	1.25878	0.995	0.957	2.65857e-64
RPS2	5.06038e-68	0.851398	0.995	1	9.1861e-64
SPARC	6.40458e-68	1.63248	1	0.91	1.16262e-63
CAMK2N1	1.27019e-67	1.45607	0.645	0.159	2.30578e-63
RPL5	1.42111e-67	0.824018	1	1	2.57975e-63
KLK5	1.42785e-67	0.304797	0.234	0.005	2.59198e-63
BST1	3.20899e-67	0.589382	0.477	0.068	5.82529e-63
RPL15	3.78238e-67	0.754631	1	1	6.86615e-63
RPS15A	4.31629e-67	1.01931	1	0.998	7.83536e-63
RPL23	9.27299e-67	0.996707	1	0.996	1.68333e-62
SERPINE3	1.27289e-66	0.317728	0.223	0.004	2.31068e-62
CTSH	2.2918e-66	0.615428	0.457	0.064	4.16031e-62
ARSJ	3.90454e-66	0.78053	0.579	0.11	7.08791e-62
TMEM176B	5.27507e-66	1.35461	0.822	0.306	9.57584e-62
RPL26	1.83909e-65	0.972253	1	0.995	3.3385e-61
NPM1	3.11006e-65	0.9905	0.99	0.981	5.6457e-61
LEPROTL1	3.75513e-65	1.15272	0.904	0.569	6.81668e-61
RPL27A	1.04689e-64	0.911074	1	0.994	1.90042e-60
CBLN2	6.08552e-64	0.705897	0.406	0.047	1.10471e-59
TMEM108	7.25249e-64	0.510035	0.401	0.048	1.31654e-59
RPL27	1.2186e-63	0.952621	1	0.992	2.21212e-59
RPS16	1.6777e-63	0.881654	0.995	0.99	3.04552e-59
RPL39	2.38021e-63	1.07792	1	0.982	4.3208e-59
NEO1	3.85145e-63	1.11012	0.797	0.346	6.99153e-59
CDC42EP1	3.92484e-63	0.864623	0.787	0.257	7.12476e-59
SCG5	4.49192e-63	0.867358	0.64	0.166	8.15419e-59
RPL19	5.70826e-63	0.94937	0.995	0.991	1.03622e-58
RPS12	1.20452e-62	0.906848	1	0.997	2.18656e-58
PAPSS2	1.48555e-62	0.725153	0.548	0.108	2.69672e-58
TMEM176A	1.8677e-62	1.37409	0.766	0.282	3.39044e-58
RPL9	1.92471e-62	0.85723	1	0.998	3.49393e-58
RPL31	2.2534e-62	1.00835	1	0.99	4.09059e-58
MAF	4.30384e-62	1.08245	0.614	0.149	7.81275e-58
RPL23A	8.6699e-62	0.968644	1	0.989	1.57385e-57
TMEM88	1.05954e-61	0.992817	0.751	0.263	1.92339e-57
SYT4	1.31601e-61	0.689511	0.279	0.016	2.38896e-57
NECAB1	3.2864e-61	0.889915	0.614	0.149	5.96581e-57
SULF2	6.99744e-61	0.966583	0.635	0.16	1.27025e-56
CRIM1	1.20328e-60	1.13778	0.878	0.397	2.18432e-56
RPS19	4.04061e-60	1.00452	0.995	0.98	7.33491e-56
RPS24	7.25714e-60	0.845099	1	0.997	1.31739e-55
EZR	7.79842e-60	1.17182	0.964	0.89	1.41565e-55
RPL29	1.38054e-59	1.04633	0.995	0.971	2.5061e-55
FLRT2	1.39216e-59	1.29373	0.939	0.629	2.52719e-55
RPL3	4.85196e-59	0.813383	0.995	0.995	8.80777e-55
GALNT18	7.15582e-59	0.544048	0.406	0.054	1.299e-54
C3orf58	2.11316e-58	1.2637	0.868	0.519	3.83602e-54
RPS14	2.38162e-58	0.955775	0.99	0.982	4.32336e-54
FAM150B	3.88831e-58	0.535203	0.376	0.045	7.05844e-54
TRNP1	5.28137e-58	0.661732	0.64	0.172	9.58726e-54
RPL18	6.83816e-58	0.925901	0.99	0.98	1.24133e-53
COBLL1	2.56252e-57	1.24036	0.822	0.423	4.65174e-53
RSRP1	3.11403e-57	1.34627	0.827	0.432	5.65291e-53
MYH10	3.2091e-57	1.09935	0.985	0.921	5.82548e-53
MIAT	4.19315e-57	0.391637	0.31	0.027	7.61182e-53
RPS5	6.15571e-57	0.824597	1	0.988	1.11745e-52
RPS25	1.33402e-56	0.779887	1	0.999	2.42164e-52
ID4	1.3904e-56	1.48443	0.893	0.481	2.524e-52
TMEM235	2.07149e-56	0.27025	0.218	0.008	3.76038e-52
PCLO	2.43413e-56	0.730774	0.487	0.091	4.41868e-52
PTGS1	2.77916e-56	0.331267	0.183	0.003	5.045e-52
NPR3	3.55299e-56	0.399441	0.213	0.007	6.44974e-52
RPL37A	4.30307e-56	0.824752	1	0.994	7.81136e-52
CCDC80	5.28763e-56	1.21498	0.954	0.681	9.59864e-52
RPL36	8.29847e-56	0.915236	0.985	0.971	1.50642e-51
PLLP	1.06008e-55	0.314413	0.279	0.02	1.92437e-51
TMSB10	3.74556e-55	0.957576	1	0.945	6.79932e-51
HNRNPA1	4.16972e-55	0.772397	1	0.991	7.5693e-51
RBP7	4.77704e-55	0.256106	0.249	0.014	8.67176e-51
RPL30	5.02305e-55	0.828669	1	0.995	9.11834e-51
RPL12	8.46093e-55	0.871777	1	0.982	1.53591e-50
RPS21	1.50493e-54	0.934523	1	0.956	2.7319e-50
MGP	1.79048e-54	0.720294	0.416	0.063	3.25026e-50
SLC7A7	2.46152e-54	0.649859	0.508	0.104	4.46839e-50
RPS11	2.73586e-54	0.80487	1	0.991	4.96642e-50
KANK4	6.17244e-54	0.837076	0.67	0.176	1.12048e-49
MYL12B	6.72653e-54	1.03951	0.97	0.826	1.22107e-49
EFNB2	7.20562e-54	1.22587	0.919	0.595	1.30804e-49
CDKN1C	7.66009e-54	1.29206	0.964	0.737	1.39054e-49
RPS28	1.07994e-53	0.877851	0.995	0.98	1.96041e-49
TUBB	1.69122e-53	0.873503	1	0.981	3.07007e-49
SH3GL3	1.77959e-53	0.867404	0.746	0.29	3.23049e-49
RPS20	2.58889e-53	0.756071	1	0.998	4.69962e-49
IGFBP2	3.11133e-53	1.10409	0.919	0.561	5.64801e-49
VASN	4.26684e-53	0.668124	0.594	0.157	7.7456e-49
KIRREL	4.96526e-53	0.824863	0.685	0.232	9.01344e-49
EEF1B2	4.96697e-53	0.860594	0.995	0.962	9.01654e-49
RPS17	5.15583e-53	1.18527	0.909	0.735	9.35938e-49
CSRP2	7.74447e-53	1.24894	0.939	0.751	1.40585e-48
TXNDC17	8.03168e-53	0.988686	0.817	0.402	1.45799e-48
SSBP3	8.69837e-53	1.07123	0.949	0.759	1.57902e-48
OR51E2	9.48136e-53	0.384384	0.228	0.012	1.72115e-48
RPL14	3.40718e-52	0.752421	0.995	0.996	6.18506e-48
RACK1	3.54316e-52	1.15316	0.909	0.76	6.4319e-48
PTMA	5.86096e-52	0.78932	1	0.986	1.06394e-47
MICAL2	1.09084e-51	1.25012	0.949	0.752	1.9802e-47
RPLP2	1.55113e-51	0.878357	1	0.988	2.81577e-47
GPNMB	2.14926e-51	0.380944	0.279	0.024	3.90155e-47
NFIX	6.40316e-51	0.329602	0.325	0.037	1.16237e-46
RAC2	1.1224e-50	0.26802	0.254	0.018	2.03749e-46
ISYNA1	6.65162e-50	1.05556	0.959	0.849	1.20747e-45
EDIL3	7.19931e-50	0.710738	0.569	0.144	1.30689e-45
ASS1	8.64272e-50	0.917666	0.746	0.307	1.56891e-45
DNAAF3	2.35798e-49	0.396801	0.33	0.041	4.28044e-45
KRT19	2.47197e-49	0.668646	0.883	0.367	4.48737e-45
LEPR	2.72652e-49	1.14616	0.848	0.559	4.94945e-45
RPLP1	5.24265e-49	0.749964	1	0.998	9.51699e-45
RPL35	6.32871e-49	0.784971	1	0.982	1.14885e-44
SEPT7	7.40743e-49	0.944225	0.954	0.938	1.34467e-44
LRRN2	9.97443e-49	0.572729	0.457	0.089	1.81066e-44
PLTP	1.26639e-48	1.11292	0.817	0.411	2.29889e-44
IL6ST	1.44373e-48	1.13596	0.949	0.846	2.6208e-44
RPL24	1.5288e-48	0.852433	0.985	0.984	2.77522e-44
RPS27A	2.08448e-48	0.692841	1	0.998	3.78395e-44
NAXE	4.93474e-48	1.12074	0.751	0.386	8.95804e-44
FBLN5	5.7659e-48	0.391025	0.355	0.05	1.04668e-43
TM4SF1	7.15387e-48	0.77683	0.416	0.072	1.29864e-43
TMEM37	2.20442e-47	0.393878	0.381	0.062	4.00168e-43
WDR66	2.40174e-47	0.416417	0.386	0.066	4.35987e-43
RPS10	2.57273e-47	0.938266	0.924	0.733	4.67027e-43
PLA2G12A	1.36457e-46	1.077	0.904	0.688	2.4771e-42
SH2D3C	1.67249e-46	0.608538	0.452	0.094	3.03607e-42
RAB11FIP1	2.42989e-46	1.07205	0.802	0.445	4.41097e-42
PTGIS	2.58939e-46	0.713032	0.589	0.174	4.70052e-42
COL8A2	2.87545e-46	0.460281	0.32	0.042	5.2198e-42
CD200	7.87131e-46	0.929978	0.751	0.343	1.42888e-41
NOTCH3	1.44939e-45	0.896633	0.832	0.422	2.63109e-41
EEF2	1.46335e-45	0.64373	1	0.995	2.65642e-41
LRRC1	1.53618e-45	0.709981	0.609	0.198	2.78862e-41
ASH2L	1.78426e-45	1.12725	0.873	0.618	3.23898e-41
SDPR	2.18041e-45	0.489561	0.279	0.03	3.95809e-41
PLAT	2.23051e-45	0.517502	0.543	0.136	4.04904e-41
FAM110C	4.06183e-45	0.425031	0.406	0.077	7.37344e-41
FAM84B	4.24837e-45	1.01944	0.924	0.582	7.71206e-41
EEF1A1	7.51846e-45	0.490369	1	1	1.36483e-40
SSC4D	1.27666e-44	0.379208	0.345	0.053	2.31751e-40
ITGA11	1.45997e-44	0.661668	0.32	0.045	2.65028e-40
ACTB	1.55961e-44	0.84091	1	0.973	2.83115e-40
SERPINB9	1.77413e-44	0.868667	0.706	0.271	3.22057e-40
RPS15	2.87057e-44	0.688983	0.995	0.988	5.21094e-40
RPS9	3.29434e-44	0.78393	0.995	0.965	5.98021e-40
RPL8	7.22648e-44	0.669481	0.99	0.982	1.31182e-39
RPS4X	1.16256e-43	0.710537	0.985	0.992	2.1104e-39
SLC7A4	5.77655e-43	0.302041	0.269	0.029	1.04862e-38
RPL28	5.89609e-43	0.718796	0.995	0.982	1.07032e-38
FSTL1	1.07546e-42	0.848845	0.985	0.961	1.95229e-38
ARHGAP23	1.07575e-42	0.890925	0.787	0.413	1.95281e-38
ODC1	1.1994e-42	0.930673	0.832	0.551	2.17727e-38
GABRB2	1.207e-42	0.996063	0.746	0.312	2.19107e-38
CYBRD1	2.33847e-42	0.558927	0.457	0.107	4.24503e-38
LAMC2	3.30296e-42	0.595085	0.477	0.124	5.99587e-38
TSPAN3	4.43935e-42	0.853268	0.954	0.863	8.05876e-38
THY1	4.70778e-42	0.359629	0.391	0.071	8.54603e-38
RPL17	6.49894e-42	0.90326	1	0.978	1.17975e-37
SYNPO	7.14339e-42	0.739158	0.701	0.27	1.29674e-37
GRIK1	7.419e-42	0.591506	0.513	0.137	1.34677e-37
FSCN1	8.28976e-42	0.752121	0.949	0.841	1.50484e-37
SGIP1	8.55666e-42	0.490414	0.462	0.109	1.55329e-37
IGFBP4	1.14781e-41	0.869654	0.701	0.289	2.08362e-37
PAK4	4.04471e-41	0.859291	0.777	0.462	7.34237e-37
LOC100288911	6.78736e-41	0.464147	0.477	0.119	1.23211e-36
TERF1	7.98728e-41	1.06667	0.827	0.571	1.44993e-36
TMSB4X	1.26001e-40	0.824645	0.995	0.73	2.2873e-36
STX11	1.36785e-40	0.305811	0.345	0.058	2.48306e-36
SLC34A2	1.61221e-40	0.319349	0.173	0.009	2.92665e-36
RBM3	3.42509e-40	0.870407	0.914	0.69	6.21756e-36
TPT1	5.39172e-40	0.529318	1	0.999	9.78759e-36
FLNA	1.00034e-39	0.881939	0.939	0.755	1.81591e-35
SEZ6L2	1.87586e-39	0.481159	0.518	0.142	3.40525e-35
ZFAS1	2.50479e-39	1.02364	0.873	0.65	4.54695e-35
LRRN4	2.91154e-39	0.406334	0.462	0.111	5.28532e-35
RPL36A	4.56365e-39	0.868376	0.929	0.74	8.28439e-35
TCF7L2	8.61122e-39	0.994934	0.888	0.689	1.56319e-34
TGFBR1	9.35372e-39	0.978114	0.827	0.535	1.69798e-34
FAM13C	1.08003e-38	0.250617	0.234	0.024	1.96058e-34
PAPPA	1.49451e-38	0.502443	0.477	0.122	2.71299e-34
DNAJC22	2.48676e-38	0.323326	0.305	0.046	4.51422e-34
NPHS1	2.64965e-38	0.282561	0.234	0.025	4.80992e-34
PHGDH	2.93833e-38	0.746651	0.741	0.348	5.33396e-34
GAP43	3.1177e-38	0.459715	0.386	0.079	5.65956e-34
PLXNB2	5.31835e-38	0.811629	0.843	0.585	9.6544e-34
SHANK1	5.82874e-38	0.313138	0.249	0.029	1.05809e-33
RPL4	6.18696e-38	0.604861	1	0.999	1.12312e-33
WNT2B	6.91441e-38	0.276942	0.254	0.031	1.25517e-33
EHD2	1.4541e-37	0.689445	0.65	0.246	2.63963e-33
COL14A1	1.61715e-37	1.07863	0.594	0.215	2.93561e-33
FAT4	3.02591e-37	0.637345	0.548	0.177	5.49293e-33
LOXL1	5.00949e-37	0.884841	0.635	0.258	9.09372e-33
MGAT4C	6.51647e-37	0.333566	0.289	0.044	1.18293e-32
MIR503HG	6.65632e-37	0.40959	0.249	0.031	1.20832e-32
RPS27	7.58406e-37	0.645786	1	0.997	1.37674e-32
APEX1	7.86318e-37	0.707414	0.939	0.87	1.4274e-32
PTBP1	1.03899e-36	0.745018	0.883	0.65	1.88608e-32
DSEL	1.07583e-36	0.813485	0.64	0.256	1.95295e-32
CDH6	1.92618e-36	0.265906	0.254	0.032	3.49659e-32
PPL	1.95425e-36	0.577767	0.513	0.157	3.54755e-32
NFIA	2.08024e-36	0.953139	0.838	0.524	3.77626e-32
ZYX	2.35279e-36	0.76979	0.959	0.86	4.27102e-32
OLFML3	4.3423e-36	0.86873	0.817	0.466	7.88258e-32
RPL22	4.84434e-36	0.611486	0.985	0.981	8.79392e-32
KCNA5	5.21031e-36	0.891739	0.645	0.257	9.45827e-32
CTGF	5.23032e-36	1.43426	0.766	0.408	9.49461e-32
MEGF6	5.37709e-36	0.432458	0.376	0.081	9.76103e-32
EFNA5	8.21101e-36	0.947068	0.858	0.591	1.49055e-31
TPM4	2.59167e-35	0.715015	0.97	0.866	4.70465e-31
BMP1	3.45566e-35	0.64701	0.645	0.28	6.27307e-31
SND1	5.15344e-35	0.744331	0.898	0.727	9.35504e-31
MYH9	5.94445e-35	0.721321	0.975	0.789	1.0791e-30
MAP3K1	7.36616e-35	0.837413	0.772	0.422	1.33718e-30
LINC01279	8.90285e-35	0.672054	0.609	0.215	1.61613e-30
COL1A1	1.90601e-34	0.631529	0.995	0.896	3.45997e-30
GABRA2	2.58469e-34	0.255188	0.193	0.018	4.69198e-30
COL1A2	3.17663e-34	0.73851	0.975	0.704	5.76653e-30
ADAMTS15	4.38522e-34	0.321964	0.355	0.078	7.96049e-30
HES4	5.59058e-34	0.530282	0.442	0.126	1.01486e-29
COL21A1	7.41846e-34	0.727911	0.599	0.217	1.34667e-29
GAL3ST3	9.74461e-34	0.457459	0.437	0.122	1.76894e-29
DNAJC15	1.22306e-33	1.31194	0.898	0.741	2.22022e-29
SSR2	1.41918e-33	0.691061	0.934	0.832	2.57624e-29
HSP90AB1	1.69452e-33	0.533193	1	0.997	3.07606e-29
TNC	1.92369e-33	1.31685	0.604	0.232	3.49208e-29
RPL13A	2.9876e-33	0.637545	0.97	0.96	5.4234e-29
CXADR	3.10726e-33	0.848945	0.893	0.729	5.6406e-29
RPL36A-HNRNPH2	5.3527e-33	0.746096	0.873	0.611	9.71676e-29
TNFSF14	6.7387e-33	0.417489	0.416	0.113	1.22328e-28
SIM1	7.62382e-33	0.260993	0.218	0.026	1.38395e-28
ABRACL	9.22527e-33	0.564852	0.604	0.242	1.67466e-28
SLITRK4	9.30208e-33	0.717063	0.589	0.236	1.68861e-28
PTPRF	1.02634e-32	0.736442	0.904	0.699	1.86311e-28
APOE	1.55208e-32	0.822907	0.939	0.764	2.81749e-28
EIF3E	2.18267e-32	0.696636	0.975	0.954	3.9622e-28
CALD1	2.64402e-32	0.719355	0.964	0.883	4.7997e-28
KCNN3	2.89683e-32	0.314188	0.249	0.037	5.25861e-28
PXDN	4.14835e-32	0.772355	0.939	0.838	7.5305e-28
ST6GALNAC5	4.31431e-32	0.367045	0.31	0.059	7.83177e-28
PTRF	5.15435e-32	0.609905	0.736	0.375	9.35669e-28
B3GNT5	5.83446e-32	0.41717	0.442	0.122	1.05913e-27
OSBPL10	7.87633e-32	0.441194	0.437	0.12	1.42979e-27
PTPRZ1	1.82577e-31	0.335985	0.274	0.047	3.31432e-27
MPP5	2.24115e-31	0.737795	0.756	0.451	4.06836e-27
TCAF1	3.01441e-31	1.13236	0.827	0.631	5.47207e-27
CREB3L1	3.13077e-31	0.588749	0.67	0.286	5.68329e-27
SPRY1	3.94075e-31	0.427513	0.376	0.092	7.15365e-27
EPHB2	4.01161e-31	0.494282	0.487	0.166	7.28227e-27
RAB15	5.98741e-31	0.720354	0.64	0.312	1.08689e-26
FBLN2	6.07757e-31	0.698755	0.675	0.312	1.10326e-26
LDOC1	6.14569e-31	0.938585	0.782	0.556	1.11563e-26
CREB5	6.24516e-31	0.687275	0.599	0.24	1.13368e-26
AKAP12	6.24827e-31	0.745657	0.853	0.58	1.13425e-26
CLDND1	7.65707e-31	0.957573	0.878	0.705	1.38999e-26
SDC2	7.92892e-31	0.880118	0.797	0.563	1.43934e-26
ARNT2	8.83919e-31	0.393092	0.437	0.128	1.60458e-26
CCND2	9.13806e-31	0.978677	0.939	0.885	1.65883e-26
ESRP1	1.03508e-30	0.366452	0.386	0.096	1.87898e-26
CLEC11A	1.51111e-30	0.736896	0.472	0.16	2.74311e-26
LRRN1	4.24402e-30	0.508555	0.462	0.135	7.70417e-26
RPS13	4.4022e-30	0.523117	1	0.997	7.99131e-26
HHIP-AS1	5.58716e-30	0.259927	0.239	0.037	1.01424e-25
PLCE1	5.92719e-30	0.432123	0.437	0.133	1.07596e-25
FAU	7.50202e-30	0.575356	0.99	0.986	1.36184e-25
CYB5R2	9.0286e-30	0.387572	0.416	0.117	1.63896e-25
HNMT	9.6324e-30	0.623309	0.569	0.221	1.74857e-25
MGST1	9.71976e-30	0.914363	0.787	0.583	1.76443e-25
FN1	1.17228e-29	0.393576	0.97	0.674	2.12804e-25
LGALS8	1.35277e-29	0.781235	0.701	0.411	2.45568e-25
IQGAP1	1.43418e-29	0.695453	0.807	0.453	2.60347e-25
GALNT10	2.25793e-29	0.489732	0.589	0.244	4.09883e-25
DMKN	2.53106e-29	0.738704	0.766	0.479	4.59463e-25
EIF3M	2.71863e-29	0.640522	0.878	0.691	4.93513e-25
NYNRIN	6.0584e-29	0.658547	0.827	0.582	1.09978e-24
ZNF641	6.64734e-29	0.640363	0.655	0.322	1.20669e-24
SEC61B	8.70496e-29	0.652212	0.914	0.74	1.58021e-24
TCEAL5	1.02576e-28	0.346714	0.35	0.087	1.86206e-24
DAAM1	1.36397e-28	0.775577	0.914	0.769	2.47602e-24
DZIP1	1.42536e-28	0.640909	0.64	0.315	2.58745e-24
ADGRA2	1.57965e-28	0.530939	0.503	0.177	2.86754e-24
PABPC1	2.08967e-28	0.545419	0.97	0.968	3.79338e-24
NECTIN2	2.32512e-28	0.611691	0.726	0.4	4.22078e-24
RAN	2.57021e-28	0.642823	0.949	0.903	4.6657e-24
RAI14	3.04354e-28	0.627965	0.832	0.494	5.52494e-24
BCHE	3.43216e-28	0.747469	0.655	0.318	6.23041e-24
DPF1	4.3941e-28	0.2959	0.259	0.048	7.97662e-24
AMOTL2	4.53952e-28	0.734207	0.832	0.559	8.24059e-24
PPIA	7.66757e-28	0.437931	1	0.998	1.39189e-23
COL6A3	8.64467e-28	0.475322	0.538	0.189	1.56927e-23
LPAR1	8.9932e-28	0.290645	0.294	0.061	1.63254e-23
SERPING1	1.52212e-27	0.651068	0.711	0.415	2.76311e-23
HERPUD2	2.12392e-27	0.622909	0.721	0.437	3.85555e-23
ZDHHC8P1	2.18822e-27	0.436982	0.467	0.162	3.97227e-23
LINC01105	2.33554e-27	0.259107	0.193	0.026	4.23971e-23
PTGDS	3.22853e-27	1.33819	0.538	0.238	5.86076e-23
MAP1LC3A	3.75489e-27	0.80705	0.726	0.456	6.81625e-23
SNHG16	3.89636e-27	0.530804	0.97	0.945	7.07305e-23
ANTXR1	4.07295e-27	0.662092	0.761	0.492	7.39362e-23
WISP1	4.73649e-27	0.640578	0.376	0.105	8.59814e-23
TRAPPC2L	6.55053e-27	0.483053	0.64	0.309	1.18912e-22
EPS8	7.09061e-27	0.573984	0.68	0.341	1.28716e-22
HMGN1	7.33914e-27	0.552377	0.99	0.978	1.33227e-22
LGALS3BP	7.43609e-27	0.714731	0.883	0.735	1.34987e-22
PTPRU	7.82624e-27	0.268268	0.264	0.052	1.4207e-22
TYRO3	1.10393e-26	0.544575	0.604	0.287	2.00396e-22
KCNMA1	1.48651e-26	0.314087	0.533	0.166	2.69847e-22
PARG	1.69157e-26	0.599853	0.609	0.307	3.0707e-22
DNM1	1.75745e-26	0.648695	0.594	0.285	3.1903e-22
DAPK1	1.78701e-26	0.439553	0.528	0.2	3.24396e-22
ASXL3	2.46838e-26	0.540919	0.614	0.303	4.48086e-22
MARCKSL1	2.88389e-26	0.61058	0.964	0.936	5.23512e-22
RAMP2	3.4091e-26	0.377454	0.462	0.157	6.18853e-22
EIF4EBP1	3.51098e-26	0.665741	0.756	0.499	6.37348e-22
EIF3F	5.3554e-26	0.559407	0.904	0.914	9.72166e-22
KLF6	8.40953e-26	0.71034	0.812	0.526	1.52658e-21
RAC1	9.69755e-26	0.517263	0.97	0.958	1.7604e-21
CEMIP	1.15842e-25	0.400445	0.294	0.067	2.10289e-21
SFRP5	1.1671e-25	1.05012	0.574	0.257	2.11863e-21
EIF3H	1.46627e-25	0.5771	0.934	0.889	2.66173e-21
ARL4D	1.56009e-25	0.654549	0.619	0.305	2.83204e-21
MMP2	1.56542e-25	0.356883	0.721	0.32	2.8417e-21
B4GALNT4	1.81827e-25	0.520912	0.65	0.338	3.3007e-21
FAM65B	1.82332e-25	0.576862	0.492	0.193	3.30988e-21
GLIPR2	2.1421e-25	0.389618	0.477	0.174	3.88855e-21
THSD4	2.25079e-25	0.562939	0.401	0.132	4.08586e-21
HEG1	2.82761e-25	0.734632	0.787	0.525	5.13296e-21
RPLP0	3.07699e-25	0.482731	0.99	0.984	5.58567e-21
PTTG1	3.09789e-25	0.344569	0.401	0.123	5.62361e-21
SNRPE	3.84143e-25	0.567415	0.848	0.676	6.97335e-21
NFIB	5.78246e-25	0.681759	0.888	0.746	1.04969e-20
SLITRK2	5.95925e-25	0.334787	0.381	0.115	1.08178e-20
MFAP2	6.25674e-25	0.648891	0.878	0.649	1.13579e-20
COL27A1	7.09152e-25	0.563309	0.629	0.293	1.28732e-20
PLA2G2A	7.2191e-25	1.17582	0.152	0.016	1.31048e-20
AHNAK	9.74822e-25	0.644459	0.939	0.729	1.76959e-20
MYL12A	1.17529e-24	0.566204	0.944	0.857	2.1335e-20
ST6GALNAC3	1.23516e-24	0.499328	0.579	0.253	2.24219e-20
RAPGEFL1	1.37721e-24	0.336206	0.34	0.096	2.50005e-20
TCF12	1.76938e-24	0.681735	0.772	0.538	3.21196e-20
PALM	2.30707e-24	0.572788	0.756	0.519	4.18803e-20
TRPS1	2.37973e-24	0.597917	0.645	0.316	4.31993e-20
CCNYL1	2.40605e-24	0.548141	0.518	0.225	4.3677e-20
CHD3	3.61767e-24	0.57501	0.787	0.528	6.56715e-20
DCN	4.85979e-24	0.919902	0.426	0.142	8.82198e-20
CLDN15	5.39086e-24	0.352818	0.335	0.092	9.78603e-20
PLA2G5	5.80779e-24	0.255199	0.112	0.007	1.05429e-19
MPST	8.5845e-24	0.552251	0.736	0.51	1.55834e-19
POMGNT2	9.23787e-24	0.373298	0.421	0.147	1.67695e-19
CEBPD	9.37995e-24	0.602953	0.594	0.282	1.70274e-19
CNN3	9.61071e-24	0.55844	0.843	0.562	1.74463e-19
SULF1	1.1994e-23	0.704068	0.574	0.25	2.17726e-19
LITAF	1.27753e-23	0.663741	0.772	0.53	2.3191e-19
SKI	1.30399e-23	0.577575	0.822	0.58	2.36713e-19
PIANP	1.47332e-23	0.453277	0.523	0.217	2.67452e-19
GNB4	1.59031e-23	0.787164	0.66	0.4	2.8869e-19
SNX30	1.60782e-23	0.435861	0.467	0.183	2.91868e-19
RCN1	1.64621e-23	0.570163	0.822	0.612	2.98837e-19
FAM234B	1.6966e-23	0.303137	0.33	0.092	3.07984e-19
CNN2	2.34715e-23	0.565234	0.954	0.876	4.26078e-19
CPXM1	2.52081e-23	0.610317	0.665	0.399	4.57602e-19
CLIP3	3.21896e-23	0.537111	0.766	0.485	5.84338e-19
EML4	3.93128e-23	0.736957	0.792	0.634	7.13645e-19
LRRC75A-AS1	3.99673e-23	0.695488	0.883	0.73	7.25526e-19
BTF3	6.04561e-23	0.534428	0.949	0.952	1.09746e-18
PRSS35	6.61346e-23	0.843329	0.761	0.481	1.20054e-18
CDK1	8.24449e-23	0.418694	0.34	0.099	1.49662e-18
SLIT3	8.44801e-23	0.825323	0.919	0.814	1.53357e-18
AHCY	8.73226e-23	0.587666	0.832	0.68	1.58517e-18
ANXA2	8.93224e-23	0.507733	0.99	0.926	1.62147e-18
HNRNPC	9.26603e-23	0.429725	0.99	0.978	1.68206e-18
UBA52	9.77315e-23	0.451754	0.98	0.968	1.77412e-18
TRIL	9.83862e-23	0.408186	0.401	0.137	1.78601e-18
ATRNL1	1.10428e-22	0.31844	0.391	0.127	2.00459e-18
DSC2	1.1581e-22	0.538522	0.782	0.49	2.10231e-18
APBB2	1.20094e-22	0.460308	0.574	0.272	2.18007e-18
SUMO2	1.38248e-22	0.487133	0.975	0.947	2.50961e-18
COL11A1	1.45742e-22	0.5439	0.513	0.221	2.64565e-18
L3MBTL3	1.52863e-22	0.315522	0.36	0.113	2.77491e-18
CTXN1	1.75494e-22	0.508529	0.66	0.371	3.18574e-18
USP13	2.43759e-22	0.661418	0.792	0.561	4.42496e-18
PHLDB2	3.08433e-22	0.25337	0.761	0.405	5.59898e-18
IQCA1	3.15261e-22	0.462379	0.508	0.214	5.72292e-18
SPTLC2	3.28889e-22	0.456256	0.584	0.291	5.97032e-18
BNC2	3.4012e-22	0.422152	0.447	0.164	6.1742e-18
LIMA1	3.58042e-22	0.42397	0.65	0.298	6.49954e-18
SPECC1	3.6849e-22	0.520537	0.599	0.303	6.6892e-18
NRBP2	4.40469e-22	0.635537	0.772	0.541	7.99584e-18
ETS2	5.89115e-22	0.58203	0.645	0.36	1.06942e-17
CPNE2	6.52342e-22	0.461598	0.513	0.222	1.1842e-17
DNAJC1	6.91307e-22	0.544277	0.721	0.451	1.25493e-17
RND3	7.93286e-22	0.454026	0.543	0.229	1.44005e-17
HNRNPH1	8.03077e-22	0.50148	0.944	0.903	1.45783e-17
HNRNPAB	8.92002e-22	0.56942	0.888	0.783	1.61925e-17
RCSD1	9.16381e-22	0.632015	0.802	0.578	1.66351e-17
CLU	1.26625e-21	0.422903	0.553	0.255	2.29863e-17
RRBP1	1.30294e-21	0.466563	0.665	0.369	2.36523e-17
HBEGF	1.31088e-21	0.440569	0.431	0.157	2.37965e-17
CHST1	1.99287e-21	0.301572	0.386	0.127	3.61765e-17
HINT1	2.24546e-21	0.456131	0.98	0.946	4.07618e-17
GAS6	2.28739e-21	0.558766	0.736	0.508	4.15231e-17
DLG2	2.56923e-21	0.36677	0.365	0.12	4.66392e-17
TKT	2.89234e-21	0.526573	0.675	0.388	5.25046e-17
CDK4	2.96461e-21	0.565451	0.832	0.686	5.38166e-17
FLJ44635	3.19586e-21	0.635679	0.822	0.614	5.80144e-17
RRP9	3.37898e-21	0.410508	0.452	0.184	6.13386e-17
PDE9A	3.67832e-21	0.357301	0.467	0.188	6.67725e-17
SNRPB	3.76034e-21	0.575825	0.848	0.739	6.82615e-17
NHSL1	3.83997e-21	0.511956	0.624	0.341	6.97069e-17
COL6A1	4.70427e-21	0.546237	0.934	0.872	8.53966e-17
ATP7B	5.17836e-21	0.537023	0.426	0.172	9.40028e-17
NONO	5.39671e-21	0.490742	0.959	0.947	9.79664e-17
NOTCH2	6.37095e-21	0.557745	0.706	0.445	1.15652e-16
CYB5D1	7.00355e-21	0.374944	0.462	0.191	1.27136e-16
HN1	8.25735e-21	0.598873	0.741	0.527	1.49896e-16
ARPC5	9.14169e-21	0.568174	0.843	0.743	1.65949e-16
CAPN2	9.32621e-21	0.529095	0.924	0.881	1.69299e-16
HNRNPDL	9.79295e-21	0.590979	0.878	0.73	1.77771e-16
SPIN4	1.15738e-20	0.731251	0.563	0.292	2.101e-16
DFNA5	1.23974e-20	0.365551	0.513	0.222	2.2505e-16
CTSC	1.31752e-20	0.603352	0.69	0.474	2.3917e-16
SKP2	1.32188e-20	0.556639	0.635	0.382	2.3996e-16
NME4	1.37367e-20	0.477668	0.964	0.952	2.49363e-16
SOX4	1.3949e-20	0.665094	0.959	0.925	2.53215e-16
SNAP23	1.43612e-20	0.460089	0.609	0.314	2.607e-16
CKAP4	1.50184e-20	0.554911	0.919	0.878	2.7263e-16
PARD6B	1.75542e-20	0.540537	0.69	0.43	3.18661e-16
GAS5	1.95078e-20	0.568949	0.893	0.775	3.54126e-16
SEMA6A	2.26428e-20	0.619205	0.736	0.455	4.11034e-16
RGL1	2.50703e-20	0.452562	0.574	0.285	4.55101e-16
SLC44A1	2.51719e-20	0.510395	0.66	0.406	4.56946e-16
ANXA5	2.70574e-20	0.529828	0.939	0.852	4.91174e-16
ADAMTS7	2.99276e-20	0.40807	0.487	0.208	5.43275e-16
TRIP6	3.23108e-20	0.524319	0.751	0.529	5.86538e-16
H3F3B	4.63444e-20	0.405133	0.985	0.952	8.4129e-16
TMSB15A	4.91311e-20	0.339165	0.32	0.098	8.91877e-16
CRMP1	4.92993e-20	0.328366	0.294	0.084	8.9493e-16
GSTP1	5.41036e-20	0.46275	0.939	0.906	9.82143e-16
LHFP	5.86915e-20	0.836786	0.792	0.636	1.06543e-15
KIAA1551	6.84489e-20	0.788488	0.701	0.472	1.24255e-15
ARHGAP28	6.85703e-20	0.488112	0.569	0.281	1.24476e-15
SEC11A	7.15068e-20	0.506028	0.914	0.836	1.29806e-15
COL5A2	7.21858e-20	0.469775	0.883	0.632	1.31039e-15
GYG2	8.08245e-20	0.416788	0.64	0.353	1.46721e-15
COL6A2	9.71835e-20	0.499159	0.848	0.637	1.76417e-15
MYO1D	1.05494e-19	0.48851	0.619	0.344	1.91504e-15
GOLM1	1.07894e-19	0.580649	0.761	0.561	1.9586e-15
GDF6	1.11037e-19	0.368188	0.406	0.151	2.01566e-15
SERPINH1	1.12045e-19	0.524946	0.898	0.842	2.03395e-15
RPL22L1	1.20477e-19	0.537331	0.65	0.397	2.18702e-15
HSP90B1	1.27037e-19	0.570871	0.964	0.956	2.3061e-15
ANXA11	1.44237e-19	0.585222	0.721	0.519	2.61833e-15
MDFIC	1.51517e-19	0.580835	0.629	0.394	2.75049e-15
RIN2	1.80049e-19	0.58512	0.751	0.539	3.26843e-15
TUBA1A	2.64266e-19	0.587009	0.934	0.82	4.79721e-15
SFPQ	2.85474e-19	0.52051	0.949	0.89	5.18221e-15
PCDH17	2.90376e-19	0.688433	0.518	0.254	5.27119e-15
SNRPD2	3.61793e-19	0.485779	0.863	0.712	6.56763e-15
PDGFD	3.7637e-19	0.407735	0.594	0.298	6.83225e-15
SNCAIP	3.79077e-19	0.331991	0.36	0.122	6.88139e-15
FNBP1L	4.19934e-19	0.490014	0.695	0.436	7.62307e-15
CCT6A	4.95041e-19	0.476892	0.893	0.857	8.98648e-15
TBC1D9	6.82329e-19	0.383937	0.503	0.233	1.23863e-14
NRXN3	7.22863e-19	0.311782	0.279	0.08	1.31221e-14
HNRNPK	7.44246e-19	0.43629	0.985	0.98	1.35103e-14
FREM2	8.83419e-19	0.635517	0.807	0.555	1.60367e-14
ZDHHC14	8.98021e-19	0.271064	0.31	0.096	1.63018e-14
ABCC1	1.18476e-18	0.308843	0.457	0.192	2.15069e-14
ALDH18A1	1.28102e-18	0.456849	0.553	0.294	2.32544e-14
CBX1	1.61542e-18	0.439322	0.736	0.535	2.93248e-14
FAT3	1.64481e-18	0.53393	0.543	0.285	2.98582e-14
DPPA4	1.78007e-18	0.296746	0.218	0.052	3.23136e-14
CGNL1	1.90248e-18	0.530204	0.873	0.745	3.45357e-14
LRRC32	2.28749e-18	0.341413	0.406	0.158	4.15248e-14
FTL	2.94667e-18	0.51026	0.985	0.969	5.3491e-14
KCNQ1OT1	3.83755e-18	0.400869	0.995	0.971	6.9663e-14
SOX8	4.55729e-18	0.281339	0.183	0.037	8.27285e-14
CA11	4.88938e-18	0.332714	0.426	0.179	8.87569e-14
HOPX	4.91126e-18	0.592392	0.315	0.106	8.91541e-14
KLF5	4.91613e-18	0.260891	0.259	0.071	8.92426e-14
GNAI2	4.94016e-18	0.418569	0.909	0.811	8.96787e-14
RHOU	5.57347e-18	0.47904	0.528	0.246	1.01175e-13
FKBP7	6.23016e-18	0.378842	0.543	0.275	1.13096e-13
MEIS3	6.82787e-18	0.406074	0.518	0.253	1.23946e-13
SFRP2	8.13872e-18	0.6152	0.401	0.155	1.47742e-13
NRARP	8.54218e-18	0.314986	0.249	0.067	1.55066e-13
TTYH3	8.98368e-18	0.445111	0.827	0.606	1.63081e-13
HNRNPA3	1.5304e-17	0.426711	0.949	0.903	2.77813e-13
KPNA2	1.55832e-17	0.261844	0.401	0.163	2.82882e-13
CDH3	1.79754e-17	0.318498	0.695	0.392	3.26307e-13
TINAGL1	1.82162e-17	0.328089	0.391	0.154	3.30679e-13
TIMP1	1.83554e-17	0.435514	0.929	0.818	3.33206e-13
WASF1	1.84745e-17	0.596991	0.792	0.672	3.35368e-13
NSG1	2.42589e-17	0.335967	0.477	0.204	4.40371e-13
ZNF185	2.87108e-17	0.306183	0.457	0.205	5.21187e-13
MTHFD1L	3.10332e-17	0.509392	0.574	0.325	5.63346e-13
GLUL	4.93313e-17	0.542652	0.832	0.731	8.95511e-13
TMEM132A	6.57157e-17	0.482444	0.695	0.47	1.19294e-12
TMPO	7.05146e-17	0.584169	0.736	0.563	1.28005e-12
RNA45S5	8.49088e-17	0.749329	0.761	0.546	1.54135e-12
SELENBP1	1.02161e-16	0.460356	0.543	0.302	1.85453e-12
CD151	1.09986e-16	0.485769	0.883	0.787	1.99658e-12
CACNA1H	1.5064e-16	0.287702	0.421	0.181	2.73457e-12
MEST	1.60436e-16	0.457001	0.66	0.385	2.91239e-12
LRRN3	1.72461e-16	0.392651	0.396	0.156	3.13069e-12
EEF1G	2.32912e-16	0.330734	0.995	0.991	4.22805e-12
LASP1	2.6369e-16	0.414606	0.761	0.498	4.78677e-12
STK26	3.25227e-16	0.514665	0.609	0.363	5.90385e-12
PSMA7	3.25516e-16	0.450167	0.954	0.882	5.90909e-12
HCFC1R1	3.48933e-16	0.424486	0.675	0.442	6.33419e-12
COL4A1	4.34517e-16	0.447885	0.893	0.792	7.88779e-12
HACD3	5.13298e-16	0.504177	0.746	0.546	9.3179e-12
BEX3	5.61828e-16	0.504195	0.909	0.76	1.01989e-11
BCAM	5.62702e-16	0.463991	0.604	0.381	1.02147e-11
ITGA1	6.07844e-16	0.436074	0.497	0.234	1.10342e-11
SRSF3	7.17099e-16	0.45809	0.939	0.892	1.30175e-11
NEK7	7.3563e-16	0.587398	0.822	0.724	1.33539e-11
CLDN11	7.48702e-16	0.253404	0.152	0.029	1.35912e-11
CSRP1	7.62361e-16	0.367064	0.909	0.785	1.38391e-11
PLP2	8.16429e-16	0.428301	0.528	0.297	1.48206e-11
TRAF5	8.40853e-16	0.306868	0.472	0.22	1.5264e-11
ITGA2	8.44161e-16	0.298024	0.208	0.054	1.53241e-11
OSTC	9.03774e-16	0.477464	0.893	0.83	1.64062e-11
CDV3	9.18902e-16	0.39498	0.893	0.79	1.66808e-11
YIF1A	9.67617e-16	0.387755	0.589	0.348	1.75651e-11
ZNF146	1.14511e-15	0.405987	0.721	0.507	2.07872e-11
CASP6	1.23605e-15	0.488542	0.629	0.401	2.2438e-11
ARF4	1.31555e-15	0.441222	0.939	0.883	2.38812e-11
PTPN14	1.3612e-15	0.476456	0.761	0.561	2.47099e-11
NPDC1	1.5773e-15	0.381349	0.635	0.396	2.86327e-11
ARHGAP10	1.61607e-15	0.256162	0.345	0.135	2.93366e-11
FOXC1	1.62762e-15	0.521843	0.457	0.213	2.95462e-11
TOMM7	1.63622e-15	0.530406	0.888	0.832	2.97022e-11
PLEKHA1	1.80766e-15	0.474483	0.726	0.529	3.28144e-11
FAM174B	1.98161e-15	0.292218	0.365	0.148	3.59721e-11
DYNC2H1	2.76197e-15	0.366193	0.523	0.282	5.0138e-11
ATP10D	3.36442e-15	0.64867	0.437	0.208	6.10744e-11
RPL36AL	3.50059e-15	0.431991	0.893	0.83	6.35462e-11
C14orf166	4.10735e-15	0.441694	0.848	0.783	7.45606e-11
TIMM23	4.14968e-15	0.428147	0.827	0.693	7.53291e-11
PCDH18	4.21366e-15	0.314685	0.391	0.16	7.64906e-11
NCL	4.37026e-15	0.401236	0.934	0.898	7.93333e-11
ZNF117	5.48771e-15	0.411702	0.619	0.386	9.96183e-11
SRM	5.58138e-15	0.459155	0.629	0.436	1.01319e-10
MAGED1	6.04919e-15	0.344545	0.954	0.959	1.09811e-10
LMO4	6.68013e-15	0.649439	0.919	0.874	1.21264e-10
SLC2A1	6.91802e-15	0.305893	0.746	0.483	1.25583e-10
TNS3	7.19638e-15	0.364971	0.558	0.303	1.30636e-10
FHL1	7.43014e-15	0.329494	0.827	0.623	1.34879e-10
EFNB1	7.50489e-15	0.453422	0.563	0.324	1.36236e-10
TXNRD1	8.39518e-15	0.644671	0.756	0.654	1.52398e-10
LIMS1	9.10047e-15	0.472352	0.726	0.541	1.65201e-10
TSPAN12	1.03902e-14	0.288966	0.345	0.139	1.88614e-10
SSR4	1.04174e-14	0.48071	0.838	0.724	1.89106e-10
ROBO1	1.21596e-14	0.435384	0.614	0.346	2.20733e-10
TMEM43	1.43462e-14	0.306405	0.528	0.287	2.60427e-10
TNS1	1.44279e-14	0.419802	0.69	0.439	2.6191e-10
TLE3	1.49576e-14	0.254421	0.35	0.139	2.71525e-10
FZD4	1.52573e-14	0.383297	0.457	0.23	2.76966e-10
PGRMC1	1.86093e-14	0.420034	0.893	0.796	3.37815e-10
CCDC85C	1.89183e-14	0.324197	0.503	0.272	3.43424e-10
RPS14P3	1.91453e-14	0.261166	0.345	0.139	3.47545e-10
GPX8	1.9231e-14	0.434963	0.782	0.602	3.491e-10
ANK3	1.92471e-14	0.46248	0.868	0.759	3.49393e-10
GCA	1.92582e-14	0.388964	0.685	0.487	3.49594e-10
ZBTB18	2.10443e-14	0.453336	0.447	0.225	3.82017e-10
NACA	2.32612e-14	0.425633	0.914	0.893	4.2226e-10
BASP1	2.54774e-14	0.422624	0.904	0.747	4.62491e-10
SMARCC1	2.54939e-14	0.504504	0.802	0.703	4.62792e-10
STMN1	2.60855e-14	0.442106	0.964	0.954	4.73531e-10
PPIB	2.63172e-14	0.461663	0.706	0.574	4.77735e-10
CYSTM1	2.85272e-14	0.341063	0.518	0.285	5.17855e-10
SLC20A1	2.9625e-14	0.30481	0.472	0.236	5.37783e-10
KAZN	3.06984e-14	0.331077	0.457	0.227	5.57268e-10
CTIF	3.10119e-14	0.337306	0.442	0.221	5.62959e-10
RPN1	3.11533e-14	0.469079	0.711	0.519	5.65526e-10
HSPA8	3.16232e-14	0.357356	0.99	0.985	5.74057e-10
SPAG9	3.16898e-14	0.491087	0.675	0.5	5.75265e-10
PRAF2	3.4752e-14	0.46114	0.792	0.62	6.30852e-10
ILF2	3.5499e-14	0.452586	0.832	0.726	6.44413e-10
OSBPL1A	4.40988e-14	0.427005	0.64	0.427	8.00526e-10
SEP15	4.4382e-14	0.408204	0.843	0.688	8.05667e-10
BIN1	4.51389e-14	0.386898	0.589	0.346	8.19406e-10
KPNB1	5.2334e-14	0.452058	0.919	0.891	9.50019e-10
SEMA5B	5.32177e-14	0.263255	0.223	0.068	9.66061e-10
CCT4	5.88388e-14	0.382578	0.929	0.905	1.0681e-09
RSL1D1	6.00803e-14	0.448635	0.802	0.695	1.09064e-09
FXYD5	6.20744e-14	0.318799	0.508	0.248	1.12684e-09
CHML	6.23609e-14	0.396864	0.538	0.316	1.13204e-09
ST3GAL1	6.58009e-14	0.533956	0.807	0.666	1.19448e-09
RAB31	7.18849e-14	0.484413	0.782	0.637	1.30493e-09
CALR	7.2143e-14	0.473046	0.898	0.857	1.30961e-09
BZW1	7.2305e-14	0.421006	0.873	0.839	1.31255e-09
COL2A1	7.24729e-14	0.489452	0.914	0.834	1.3156e-09
PSAP	7.25039e-14	0.370835	0.964	0.957	1.31616e-09
TMED2	7.37031e-14	0.41326	0.812	0.697	1.33793e-09
TP53	8.14544e-14	0.279831	0.513	0.275	1.47864e-09
SLC3A2	8.34313e-14	0.440758	0.766	0.561	1.51453e-09
RYK	8.92937e-14	0.534684	0.695	0.517	1.62095e-09
ARPC2	9.1242e-14	0.337021	0.975	0.976	1.65632e-09
P4HB	9.98e-14	0.378028	0.888	0.819	1.81167e-09
SLC4A2	1.04109e-13	0.39387	0.69	0.532	1.88988e-09
DCAF8	1.12749e-13	0.481413	0.731	0.637	2.04673e-09
LRP1	1.14556e-13	0.538042	0.665	0.485	2.07953e-09
NPC2	1.24817e-13	0.38409	0.898	0.816	2.2658e-09
PLXNB1	1.29633e-13	0.407095	0.548	0.324	2.35322e-09
KHDRBS1	1.30788e-13	0.411092	0.934	0.916	2.37419e-09
TJP1	1.3363e-13	0.450176	0.797	0.708	2.42578e-09
AKT3	1.60263e-13	0.473917	0.731	0.555	2.90926e-09
SPATS2L	1.66614e-13	0.427677	0.797	0.612	3.02454e-09
LRFN1	1.6908e-13	0.339169	0.457	0.242	3.06932e-09
DAB2	1.71488e-13	0.422897	0.518	0.292	3.11303e-09
SLBP	1.73283e-13	0.350842	0.685	0.453	3.1456e-09
RALGDS	1.77015e-13	0.355886	0.472	0.256	3.21336e-09
PCOLCE	2.0013e-13	0.376717	0.533	0.305	3.63296e-09
SCARF2	2.57421e-13	0.311251	0.538	0.31	4.67297e-09
PXK	2.88235e-13	0.354422	0.335	0.148	5.23233e-09
DBN1	3.45052e-13	0.402045	0.807	0.693	6.26372e-09
C6orf48	3.5958e-13	0.370891	0.914	0.893	6.52746e-09
TIMM23B	3.61809e-13	0.298972	0.396	0.187	6.56792e-09
OAT	3.95759e-13	0.33261	0.589	0.36	7.18422e-09
SNRPF	4.26143e-13	0.422136	0.66	0.467	7.73578e-09
TGFBR3	4.47749e-13	0.304333	0.259	0.092	8.12798e-09
CLTA	4.59015e-13	0.408815	0.802	0.661	8.33251e-09
TMEM141	4.59983e-13	0.425178	0.711	0.525	8.35007e-09
APMAP	5.10481e-13	0.415883	0.675	0.493	9.26676e-09
ZFHX2	5.38849e-13	0.374954	0.431	0.219	9.78172e-09
PPDPF	5.56148e-13	0.400606	0.949	0.929	1.00958e-08
PARVA	5.5873e-13	0.455668	0.741	0.583	1.01426e-08
ACLY	6.17108e-13	0.472423	0.746	0.578	1.12024e-08
C14orf132	7.3732e-13	0.296777	0.558	0.302	1.33846e-08
JOSD1	8.08113e-13	0.364724	0.558	0.356	1.46697e-08
EPHB4	8.54185e-13	0.31093	0.528	0.306	1.5506e-08
PDIA3	1.00608e-12	0.401309	0.701	0.546	1.82634e-08
WLS	1.03858e-12	0.297406	0.919	0.857	1.88534e-08
HDLBP	1.06268e-12	0.353838	0.954	0.932	1.92908e-08
ILF3	1.08936e-12	0.400601	0.904	0.857	1.97751e-08
HUNK	1.22997e-12	0.288226	0.355	0.162	2.23277e-08
HLA-A	1.25188e-12	0.446701	0.751	0.601	2.27254e-08
PXDC1	1.53061e-12	0.286554	0.462	0.246	2.77852e-08
MIR100HG	1.56812e-12	0.487853	0.711	0.506	2.84661e-08
SPOPL	1.62438e-12	0.307376	0.553	0.312	2.94874e-08
IGF1R	1.62975e-12	0.469534	0.777	0.661	2.95849e-08
HNRNPR	1.75764e-12	0.366384	0.888	0.821	3.19064e-08
RHOBTB1	1.76369e-12	0.330343	0.497	0.276	3.20162e-08
CYR61	1.77356e-12	0.776527	0.67	0.459	3.21955e-08
HNRNPA2B1	1.88475e-12	0.372708	0.985	0.984	3.42139e-08
APLP2	2.03475e-12	0.399935	0.97	0.974	3.69367e-08
CADM4	2.07859e-12	0.311687	0.401	0.204	3.77326e-08
MYDGF	2.12087e-12	0.368594	0.508	0.304	3.85001e-08
ANO5	2.33331e-12	0.373595	0.538	0.314	4.23566e-08
GNAI1	2.75e-12	0.392685	0.533	0.308	4.99208e-08
UBE2I	3.0216e-12	0.36349	0.827	0.735	5.4851e-08
RNF41	3.11599e-12	0.350992	0.635	0.426	5.65647e-08
SEPT10	3.2128e-12	0.45473	0.736	0.597	5.8322e-08
POLR1E	3.57945e-12	0.264171	0.386	0.191	6.49778e-08
TCEAL7	3.79068e-12	0.329427	0.426	0.219	6.88122e-08
DDOST	3.86533e-12	0.358144	0.701	0.538	7.01673e-08
SERP1	4.36058e-12	0.369015	0.792	0.671	7.91576e-08
RBMX	4.79339e-12	0.444225	0.878	0.857	8.70143e-08
NSMF	4.82833e-12	0.266446	0.381	0.181	8.76487e-08
BTF3L4	5.50832e-12	0.390736	0.873	0.774	9.99926e-08
CCT5	5.97567e-12	0.368358	0.858	0.76	1.08476e-07
ZNF850	6.15073e-12	0.262915	0.33	0.147	1.11654e-07
CDK14	6.76114e-12	0.431575	0.65	0.467	1.22735e-07
GADD45B	6.8256e-12	0.476805	0.457	0.261	1.23905e-07
RFTN1	6.97904e-12	0.424235	0.589	0.379	1.26691e-07
SNU13	8.27477e-12	0.398793	0.802	0.635	1.50212e-07
NUTM2B-AS1	9.12338e-12	0.383736	0.538	0.344	1.65617e-07
KDELR1	9.32377e-12	0.332594	0.934	0.898	1.69254e-07
HNRNPA0	1.05977e-11	0.383376	0.893	0.847	1.9238e-07
CTNNB1	1.10807e-11	0.454283	0.838	0.754	2.01148e-07
SPTAN1	1.18891e-11	0.426663	0.893	0.856	2.15823e-07
PDIA4	1.19013e-11	0.381728	0.645	0.443	2.16045e-07
TP53RK	1.46575e-11	0.253675	0.513	0.291	2.66078e-07
SOWAHC	1.47651e-11	0.298137	0.503	0.279	2.68031e-07
ARRDC3	1.49985e-11	0.334324	0.492	0.286	2.72268e-07
PAPSS1	1.56538e-11	0.364285	0.706	0.508	2.84164e-07
CNPY2	1.57604e-11	0.367246	0.741	0.591	2.86099e-07
RRAS2	1.67893e-11	0.339578	0.609	0.416	3.04777e-07
KCTD3	1.72212e-11	0.429414	0.695	0.545	3.12617e-07
PIK3R2	1.73648e-11	0.421523	0.756	0.65	3.15223e-07
PABPC4L	1.8099e-11	0.304505	0.431	0.229	3.28551e-07
PSMG1	1.88439e-11	0.384128	0.548	0.346	3.42073e-07
KDM1B	2.07683e-11	0.275131	0.431	0.225	3.77007e-07
FAM200B	2.20559e-11	0.412387	0.721	0.574	4.0038e-07
KIAA1522	2.35714e-11	0.272383	0.619	0.405	4.27892e-07
ACOT7	2.48098e-11	0.312358	0.35	0.166	4.50372e-07
HYOU1	2.54023e-11	0.312398	0.635	0.432	4.61129e-07
LEPROT	2.86244e-11	0.359263	0.858	0.821	5.19619e-07
FILIP1L	2.86369e-11	0.274178	0.431	0.218	5.19846e-07
ANXA3	3.12479e-11	0.309103	0.665	0.422	5.67243e-07
SLC7A5	3.19635e-11	0.302387	0.299	0.121	5.80234e-07
ELOVL5	3.78472e-11	0.395217	0.665	0.516	6.8704e-07
BSG	4.7202e-11	0.350125	0.919	0.906	8.56858e-07
ZNHIT1	4.94318e-11	0.356251	0.761	0.656	8.97335e-07
MAX	5.0143e-11	0.355972	0.685	0.515	9.10246e-07
ARPC1B	5.36261e-11	0.281362	0.528	0.316	9.73475e-07
SESN3	5.59245e-11	0.33289	0.746	0.53	1.0152e-06
RNU4ATAC	6.02941e-11	0.2673	0.305	0.138	1.09452e-06
RHEB	6.19507e-11	0.332793	0.893	0.874	1.12459e-06
SEC63	6.19575e-11	0.389465	0.772	0.688	1.12471e-06
ACTR2	6.24003e-11	0.369715	0.843	0.775	1.13275e-06
MXD4	6.35667e-11	0.349594	0.64	0.463	1.15393e-06
DTD2	6.52054e-11	0.258645	0.452	0.25	1.18367e-06
POLE4	6.56503e-11	0.255259	0.442	0.243	1.19175e-06
LIMS2	6.60227e-11	0.321618	0.609	0.388	1.19851e-06
FZD8	6.6399e-11	0.382681	0.533	0.329	1.20534e-06
HM13	6.73448e-11	0.368787	0.655	0.451	1.22251e-06
SQLE	6.83421e-11	0.383479	0.645	0.479	1.24061e-06
SPATA13	6.86536e-11	0.264811	0.244	0.096	1.24627e-06
ZNF106	7.05271e-11	0.435157	0.67	0.496	1.28028e-06
IFITM1	7.08556e-11	0.317375	0.64	0.416	1.28624e-06
GCNT2	7.14e-11	0.287633	0.416	0.224	1.29612e-06
C19orf48	7.31747e-11	0.2626	0.416	0.226	1.32834e-06
LTBP4	7.72318e-11	0.537273	0.65	0.504	1.40199e-06
ANLN	7.74791e-11	0.364096	0.365	0.189	1.40648e-06
PDCD4	8.06901e-11	0.348112	0.614	0.417	1.46477e-06
HIST1H4C	9.50417e-11	0.437857	0.508	0.324	1.72529e-06
SHTN1	9.81489e-11	0.28096	0.416	0.218	1.7817e-06
ITGB1	1.01069e-10	0.27599	0.98	0.969	1.83471e-06
CDH11	1.02183e-10	0.414289	0.624	0.417	1.85493e-06
TCF3	1.04701e-10	0.332384	0.685	0.515	1.90064e-06
EPSTI1	1.06186e-10	0.318986	0.518	0.304	1.9276e-06
NELL1	1.08176e-10	0.278763	0.376	0.183	1.96372e-06
ANKRD50	1.13439e-10	0.547853	0.746	0.619	2.05927e-06
OGFRL1	1.14677e-10	0.486912	0.345	0.176	2.08172e-06
IP6K2	1.16576e-10	0.355036	0.766	0.625	2.1162e-06
CD74	1.34845e-10	0.283797	0.431	0.225	2.44784e-06
CAPRIN1	1.35284e-10	0.350672	0.898	0.87	2.45582e-06
AEBP1	1.36405e-10	0.47546	0.731	0.625	2.47615e-06
SYNCRIP	1.49136e-10	0.410184	0.848	0.785	2.70726e-06
MED28	1.6155e-10	0.392461	0.65	0.494	2.93261e-06
C4orf48	1.66325e-10	0.36097	0.685	0.532	3.0193e-06
REXO2	1.75841e-10	0.41588	0.701	0.543	3.19203e-06
SEMA3C	1.7597e-10	0.356154	0.655	0.426	3.19438e-06
APP	1.78153e-10	0.425651	0.914	0.898	3.23402e-06
NHP2	1.81625e-10	0.348682	0.711	0.578	3.29705e-06
PATJ	1.8172e-10	0.361903	0.487	0.283	3.29876e-06
ATIC	2.09656e-10	0.340039	0.675	0.517	3.80588e-06
EIF3D	2.21718e-10	0.431783	0.817	0.781	4.02484e-06
NIFK	2.22544e-10	0.275527	0.431	0.247	4.03985e-06
SH3PXD2B	2.51958e-10	0.383856	0.472	0.275	4.57379e-06
PNMA1	2.78319e-10	0.361993	0.741	0.603	5.05233e-06
CLNS1A	2.99148e-10	0.365216	0.802	0.694	5.43044e-06
PDE1A	3.13036e-10	0.290382	0.178	0.058	5.68254e-06
CAMLG	3.26764e-10	0.360794	0.766	0.627	5.93174e-06
CORO1B	3.26852e-10	0.304649	0.635	0.446	5.93334e-06
BRD3	3.32062e-10	0.334091	0.675	0.486	6.02792e-06
SPRY2	4.02262e-10	0.306935	0.487	0.297	7.30227e-06
ACTL6A	4.39258e-10	0.291784	0.538	0.362	7.97385e-06
ADGRL1	4.90501e-10	0.334539	0.64	0.433	8.90407e-06
CCDC50	5.001e-10	0.357653	0.766	0.709	9.07832e-06
GPRC5C	5.10522e-10	0.368011	0.513	0.341	9.2675e-06
IPO5	5.31093e-10	0.330559	0.817	0.731	9.64092e-06
GLMP	5.33934e-10	0.263983	0.31	0.145	9.69251e-06
ENY2	5.70875e-10	0.340142	0.731	0.618	1.03631e-05
APRT	5.74265e-10	0.281323	0.548	0.358	1.04246e-05
OSBPL9	5.84825e-10	0.496253	0.858	0.783	1.06163e-05
SET	7.3045e-10	0.321412	0.959	0.975	1.32599e-05
TRANK1	7.64311e-10	0.37775	0.416	0.231	1.38745e-05
RPN2	7.7227e-10	0.385755	0.812	0.75	1.4019e-05
GRB10	8.19022e-10	0.259367	0.421	0.231	1.48677e-05
CCNL2	8.71131e-10	0.346382	0.838	0.78	1.58137e-05
YBX3	8.83074e-10	0.293769	0.594	0.412	1.60305e-05
FCGRT	1.00374e-09	0.291778	0.594	0.417	1.82209e-05
ARCN1	1.02261e-09	0.338928	0.848	0.743	1.85634e-05
ELAVL2	1.07219e-09	0.265457	0.315	0.154	1.94635e-05
DSG2	1.07739e-09	0.375887	0.756	0.681	1.95579e-05
RANBP1	1.09496e-09	0.334273	0.731	0.625	1.98767e-05
GANAB	1.11606e-09	0.306806	0.731	0.587	2.02598e-05
PRKCI	1.11946e-09	0.265249	0.533	0.344	2.03215e-05
CXCL14	1.14705e-09	0.594544	0.218	0.084	2.08223e-05
TRIM28	1.18019e-09	0.314411	0.949	0.948	2.14239e-05
EIF2S3	1.31417e-09	0.277858	0.904	0.86	2.38562e-05
SNHG5	1.32707e-09	0.345053	0.777	0.667	2.40903e-05
MXRA8	1.40892e-09	0.309865	0.675	0.465	2.5576e-05
SLN	1.47534e-09	0.533573	0.355	0.181	2.67818e-05
SNRPD1	1.49908e-09	0.33419	0.645	0.482	2.72128e-05
RABL6	1.50729e-09	0.426364	0.792	0.697	2.73619e-05
KDELR2	1.50799e-09	0.311527	0.822	0.752	2.73745e-05
PIEZO2	1.57853e-09	0.288284	0.168	0.054	2.86551e-05
PCMTD2	1.63507e-09	0.409864	0.69	0.585	2.96815e-05
CHURC1	1.83682e-09	0.331856	0.787	0.646	3.33438e-05
ALKBH7	1.8738e-09	0.288907	0.665	0.497	3.40151e-05
ASAP2	1.88856e-09	0.264871	0.548	0.339	3.42831e-05
TNKS1BP1	1.93054e-09	0.328351	0.624	0.463	3.50451e-05
CUTA	2.13857e-09	0.318809	0.898	0.855	3.88215e-05
SRP72	2.32633e-09	0.363314	0.812	0.772	4.223e-05
DNAJC10	2.78637e-09	0.320227	0.797	0.72	5.05809e-05
NSA2	3.00456e-09	0.393249	0.807	0.721	5.45418e-05
TTC17	3.0196e-09	0.401354	0.777	0.674	5.48149e-05
SEC61A1	3.05861e-09	0.298349	0.645	0.504	5.5523e-05
AXL	3.09872e-09	0.311338	0.817	0.691	5.6251e-05
TWSG1	3.11771e-09	0.327494	0.614	0.445	5.65959e-05
MAB21L2	3.20338e-09	0.260904	0.365	0.187	5.8151e-05
CAB39L	3.27773e-09	0.403716	0.437	0.263	5.95006e-05
IGF2BP3	3.38688e-09	0.33859	0.695	0.546	6.1482e-05
HNRNPM	3.45012e-09	0.327359	0.873	0.819	6.26301e-05
DDX42	3.5869e-09	0.299122	0.812	0.67	6.51131e-05
ULK2	3.72478e-09	0.347108	0.543	0.369	6.7616e-05
SEC31A	3.74311e-09	0.334889	0.909	0.878	6.79486e-05
VARS	3.76107e-09	0.293635	0.472	0.297	6.82747e-05
PFKFB3	3.86164e-09	0.270072	0.442	0.268	7.01003e-05
XRCC5	3.93773e-09	0.317857	0.934	0.932	7.14817e-05
PLXNA2	3.98055e-09	0.392284	0.619	0.458	7.22589e-05
COPB1	4.03597e-09	0.310772	0.873	0.784	7.3265e-05
ZNF581	4.14445e-09	0.261142	0.437	0.253	7.52342e-05
C1orf122	4.40085e-09	0.329031	0.782	0.715	7.98886e-05
ARPC3	4.47657e-09	0.323624	0.832	0.747	8.12632e-05
SEC61G	4.66233e-09	0.305286	0.909	0.853	8.46354e-05
TMEM123	4.67046e-09	0.364987	0.787	0.726	8.47829e-05
TCF7L1	4.75166e-09	0.329164	0.685	0.518	8.62569e-05
NIPSNAP1	4.85192e-09	0.346068	0.761	0.671	8.80769e-05
SRP9	4.88816e-09	0.294894	0.97	0.958	8.87347e-05
DDR1	5.09423e-09	0.318541	0.736	0.634	9.24755e-05
STRBP	5.13237e-09	0.353145	0.594	0.441	9.3168e-05
ADSL	5.22169e-09	0.349376	0.695	0.58	9.47893e-05
CKS2	5.44098e-09	0.291913	0.376	0.204	9.87701e-05
FZD2	5.48349e-09	0.359389	0.761	0.627	9.95418e-05
ACTN4	5.66036e-09	0.342261	0.873	0.821	0.000102753
PLXNA1	5.8302e-09	0.293577	0.523	0.354	0.000105836
INF2	5.98476e-09	0.280283	0.533	0.366	0.000108641
SNRPD3	6.07297e-09	0.300599	0.756	0.625	0.000110243
BACH2	6.46247e-09	0.287886	0.406	0.228	0.000117313
POLR1D	6.67229e-09	0.356728	0.741	0.595	0.000121122
TPD52L1	6.83578e-09	0.303421	0.472	0.297	0.00012409
CANX	6.95245e-09	0.286326	0.949	0.944	0.000126208
TAX1BP1	7.32815e-09	0.367423	0.878	0.845	0.000133028
FKBP10	7.90224e-09	0.310119	0.736	0.58	0.000143449
FUCA2	8.7033e-09	0.263336	0.563	0.388	0.000157991
MCM7	8.72704e-09	0.354255	0.624	0.46	0.000158422
LATS2	8.84135e-09	0.327035	0.65	0.509	0.000160497
ANAPC5	9.5484e-09	0.33414	0.807	0.74	0.000173332
ZKSCAN1	1.03324e-08	0.3555	0.832	0.762	0.000187564
TPM3	1.13834e-08	0.301259	0.746	0.637	0.000206644
MTMR6	1.18898e-08	0.277203	0.584	0.408	0.000215836
TUSC1	1.28806e-08	0.344793	0.604	0.458	0.000233821
NRP2	1.31308e-08	0.266165	0.543	0.354	0.000238363
SKA2	1.32492e-08	0.362815	0.675	0.527	0.000240513
NCOR2	1.41248e-08	0.34339	0.756	0.662	0.000256407
GLI3	1.49244e-08	0.389742	0.589	0.416	0.000270923
UBB	1.49732e-08	0.25181	0.99	0.991	0.000271808
PHB2	1.61819e-08	0.27113	0.878	0.883	0.00029375
EIF2AK4	1.64034e-08	0.37782	0.65	0.526	0.000297772
PFDN1	1.68243e-08	0.341139	0.741	0.635	0.000305411
FBL	1.69702e-08	0.288121	0.777	0.684	0.000308061
CD47	1.94057e-08	0.371934	0.726	0.621	0.000352272
EXT1	1.94137e-08	0.298798	0.624	0.471	0.000352416
CUX1	1.95157e-08	0.334034	0.914	0.908	0.000354269
PNRC2	2.01252e-08	0.381398	0.797	0.728	0.000365332
PLPP3	2.17204e-08	0.567166	0.589	0.45	0.00039429
COPS9	2.28683e-08	0.270986	0.563	0.377	0.000415128
SF3B6	2.43494e-08	0.292219	0.695	0.513	0.000442015
PHLDB1	2.5273e-08	0.328662	0.655	0.523	0.000458781
UBE2E2	2.53143e-08	0.303512	0.528	0.36	0.00045953
CTTN	2.58561e-08	0.321837	0.706	0.544	0.000469365
OLFML2A	2.59554e-08	0.263316	0.65	0.489	0.000471168
ZRANB2	2.80639e-08	0.348453	0.863	0.802	0.000509444
FAT1	2.82714e-08	0.42943	0.746	0.676	0.000513211
SNHG7	2.91206e-08	0.398333	0.766	0.656	0.000528627
SORBS3	2.94303e-08	0.292299	0.777	0.664	0.000534248
PLEKHG3	3.3157e-08	0.300187	0.553	0.396	0.0006019
FAM177A1	3.58972e-08	0.312292	0.604	0.46	0.000651642
TMA7	3.62074e-08	0.31	0.893	0.914	0.000657273
CUL1	3.74389e-08	0.394992	0.751	0.703	0.000679629
ANOS1	3.87392e-08	0.281748	0.421	0.248	0.000703233
OST4	4.02805e-08	0.281548	0.939	0.921	0.000731213
PRKCSH	4.03954e-08	0.305991	0.741	0.625	0.000733298
RCN2	4.07515e-08	0.353942	0.761	0.661	0.000739761
TRO	4.31409e-08	0.293201	0.629	0.481	0.000783137
SMARCD1	4.60218e-08	0.275076	0.553	0.387	0.000835434
FGFRL1	4.74623e-08	0.279534	0.442	0.276	0.000861583
PFKL	5.00156e-08	0.272073	0.609	0.446	0.000907934
SNX5	5.09052e-08	0.309797	0.787	0.701	0.000924083
TBCB	6.28551e-08	0.281477	0.756	0.631	0.00114101
AQP1	7.45342e-08	0.694704	0.487	0.351	0.00135302
SSR1	7.72007e-08	0.290847	0.797	0.708	0.00140142
GLTSCR2	8.26386e-08	0.343086	0.721	0.644	0.00150014
RCC2	9.15319e-08	0.364482	0.68	0.566	0.00166158
TRMT112	9.20298e-08	0.269974	0.888	0.846	0.00167062
LINC00504	9.24187e-08	0.437052	0.756	0.602	0.00167768
C8orf59	9.66038e-08	0.289826	0.65	0.506	0.00175365
C19orf43	9.93866e-08	0.3064	0.832	0.754	0.00180416
NME1	1.03496e-07	0.319927	0.563	0.414	0.00187876
SETMAR	1.04106e-07	0.287656	0.406	0.251	0.00188983
STT3B	1.08182e-07	0.335804	0.802	0.688	0.00196383
ATR	1.16651e-07	0.254899	0.462	0.297	0.00211757
NCK2	1.18501e-07	0.312024	0.574	0.434	0.00215114
LAMP1	1.21947e-07	0.307091	0.675	0.554	0.00221371
UBXN1	1.22934e-07	0.305175	0.711	0.603	0.00223161
PTMS	1.23578e-07	0.271944	0.959	0.935	0.00224331
SHFM1	1.4359e-07	0.355071	0.721	0.601	0.0026066
GXYLT1	1.44342e-07	0.29025	0.528	0.38	0.00262024
BEX2	1.46489e-07	0.302541	0.574	0.428	0.00265921
ARID5B	1.46667e-07	0.295399	0.558	0.371	0.00266245
IMPDH2	1.65821e-07	0.302861	0.721	0.623	0.00301016
TRA2B	1.68952e-07	0.314945	0.807	0.773	0.00306699
MORF4L2	1.71493e-07	0.265179	0.919	0.894	0.00311311
NRAS	1.82653e-07	0.273332	0.695	0.573	0.0033157
AAMDC	1.89542e-07	0.258726	0.442	0.288	0.00344076
SAR1A	1.93907e-07	0.308653	0.746	0.657	0.00351999
MBTPS1	2.00437e-07	0.367681	0.746	0.619	0.00363852
PAFAH1B3	2.03879e-07	0.300837	0.604	0.477	0.00370102
SEC13	2.10619e-07	0.284689	0.777	0.726	0.00382337
ACP1	2.11055e-07	0.309304	0.782	0.757	0.00383129
TMEM50A	2.13836e-07	0.364962	0.817	0.786	0.00388176
PRDM6	2.20039e-07	0.293823	0.416	0.251	0.00399437
CFDP1	2.32422e-07	0.296951	0.746	0.601	0.00421916
TCEAL9	2.43924e-07	0.285438	0.766	0.615	0.00442795
RHOB	2.44259e-07	0.328471	0.406	0.259	0.00443403
RAD23B	2.51631e-07	0.290749	0.843	0.801	0.00456786
VKORC1L1	2.59817e-07	0.312321	0.513	0.369	0.00471646
AASS	2.64385e-07	0.371731	0.69	0.604	0.00479937
ZNF426	2.66349e-07	0.315486	0.548	0.406	0.00483504
AGAP1	2.85775e-07	0.305023	0.558	0.413	0.00518768
SRSF10	2.92714e-07	0.297556	0.777	0.743	0.00531364
FBXL5	3.00527e-07	0.338875	0.731	0.669	0.00545547
ADNP	3.28802e-07	0.282814	0.812	0.765	0.00596875
LIX1L	3.31207e-07	0.253959	0.543	0.373	0.0060124
PLOD2	3.48734e-07	0.356353	0.817	0.726	0.00633057
CTDSP2	3.49146e-07	0.302273	0.827	0.795	0.00633804
TIA1	3.56233e-07	0.286655	0.838	0.827	0.00646669
TBL1XR1	3.56585e-07	0.331974	0.832	0.824	0.00647309
CELF2	3.58326e-07	0.352085	0.807	0.756	0.00650469
PPP3CA	3.65567e-07	0.319114	0.69	0.565	0.00663613
UBA6	3.75874e-07	0.264494	0.609	0.468	0.00682324
MYO1C	3.87508e-07	0.334635	0.726	0.639	0.00703443
GIPC1	4.13744e-07	0.309336	0.701	0.617	0.0075107
EIF5A	4.1532e-07	0.289013	0.665	0.547	0.0075393
ERGIC3	4.18242e-07	0.251809	0.873	0.874	0.00759234
RBCK1	4.35212e-07	0.294675	0.594	0.453	0.0079004
TMEM258	4.4612e-07	0.269704	0.827	0.765	0.00809841
GDI2	4.47784e-07	0.259866	0.873	0.839	0.00812863
AASDHPPT	4.55177e-07	0.318313	0.797	0.722	0.00826282
CDK2AP1	4.61904e-07	0.31069	0.832	0.782	0.00838493
NORAD	4.78984e-07	0.309172	0.817	0.7	0.008695
SH3BP4	5.20692e-07	0.409651	0.66	0.547	0.00945212
SCRN1	5.29606e-07	0.255377	0.848	0.765	0.00961394
DTD1	5.49427e-07	0.31443	0.508	0.365	0.00997374
ADGRL2	5.52288e-07	0.404744	0.67	0.517	0.0100257
RARA	5.7618e-07	0.266855	0.431	0.274	0.0104594
DDX52	5.81641e-07	0.289113	0.604	0.472	0.0105585
FGFR2	5.81721e-07	0.35832	0.675	0.544	0.01056
SLC1A3	5.91112e-07	0.31379	0.579	0.434	0.0107305
DICER1	6.01527e-07	0.333652	0.772	0.709	0.0109195
TCF4	6.1283e-07	0.250017	0.782	0.654	0.0111247
ZMYND8	6.21661e-07	0.342791	0.756	0.655	0.011285
CTSD	6.4789e-07	0.300487	0.701	0.637	0.0117611
SURF6	6.60059e-07	0.262103	0.477	0.339	0.011982
RABAC1	7.61319e-07	0.277236	0.66	0.545	0.0138202
KDM1A	7.67112e-07	0.304492	0.629	0.537	0.0139254
IFT22	8.35165e-07	0.277412	0.431	0.277	0.0151607
IGF2BP1	8.60291e-07	0.307126	0.848	0.785	0.0156169
JADE1	8.63935e-07	0.25479	0.503	0.336	0.015683
FSTL3	9.31712e-07	0.38157	0.386	0.249	0.0169134
ZNF706	9.44856e-07	0.273106	0.67	0.561	0.017152
HMGB1	9.56754e-07	0.258884	0.975	0.978	0.017368
PHF14	9.7905e-07	0.269752	0.624	0.511	0.0177727
PRRC2B	9.91672e-07	0.259043	0.934	0.938	0.0180018
CNRIP1	1.11407e-06	0.252421	0.335	0.194	0.0202237
LOC101928103	1.13084e-06	0.370768	0.675	0.535	0.020528
TCTN1	1.15556e-06	0.254851	0.533	0.382	0.0209768
HMGN2	1.27322e-06	0.345466	0.782	0.739	0.0231127
CRISPLD1	1.3082e-06	0.40433	0.462	0.327	0.0237478
ACIN1	1.33361e-06	0.308231	0.761	0.681	0.0242091
ARHGAP32	1.334e-06	0.261632	0.538	0.384	0.024216
TAF10	1.34336e-06	0.269893	0.807	0.749	0.024386
SMARCE1	1.38573e-06	0.25915	0.893	0.887	0.0251551
KARS	1.4181e-06	0.271066	0.726	0.654	0.0257427
SF1	1.4298e-06	0.254659	0.934	0.911	0.0259551
YKT6	1.4627e-06	0.282802	0.736	0.65	0.0265524
PTP4A1	1.47004e-06	0.260892	0.741	0.675	0.0266856
MFGE8	1.61862e-06	0.261861	0.558	0.409	0.0293828
DNAJB6	1.66144e-06	0.302258	0.843	0.796	0.0301601
ERBIN	1.693e-06	0.28175	0.635	0.524	0.030733
FNDC3B	1.99179e-06	0.250655	0.782	0.692	0.0361569
SYTL5	2.06446e-06	0.260024	0.381	0.234	0.0374762
TMBIM1	2.11778e-06	0.277476	0.609	0.481	0.038444
RAB34	2.1325e-06	0.252733	0.629	0.498	0.0387112
CDK5RAP3	2.18494e-06	0.26661	0.67	0.569	0.0396632
C11orf95	2.20623e-06	0.251047	0.533	0.393	0.0400497
NUTF2	2.318e-06	0.27756	0.569	0.437	0.0420786
EIF4G1	2.42154e-06	0.266534	0.807	0.737	0.0439581
RSPRY1	2.49808e-06	0.251056	0.548	0.407	0.0453476
SEPT11	2.54311e-06	0.266491	0.751	0.673	0.0461651
EBNA1BP2	2.57091e-06	0.253746	0.492	0.358	0.0466697
ADAR	2.69612e-06	0.269702	0.761	0.728	0.0489426
EHMT2	2.90203e-06	0.279782	0.65	0.541	0.0526806
TMEM219	3.02114e-06	0.27226	0.66	0.576	0.0548427
NDN	3.08179e-06	0.256399	0.853	0.787	0.0559438
DNAJC6	3.25024e-06	0.2633	0.701	0.609	0.0590017
DTX3	3.3767e-06	0.260727	0.711	0.628	0.0612972
CCND1	3.54453e-06	0.422123	0.655	0.557	0.0643439
FMR1	3.63406e-06	0.358742	0.635	0.57	0.0659691
ZNF618	3.66206e-06	0.291048	0.736	0.631	0.0664773
NOB1	3.77141e-06	0.266603	0.467	0.328	0.0684625
SUMO1	3.82455e-06	0.272978	0.635	0.534	0.069427
RUNX1T1	3.94336e-06	0.328458	0.838	0.829	0.0715838
STOX2	4.00106e-06	0.275178	0.421	0.29	0.0726313
MAT2B	4.26627e-06	0.272911	0.614	0.506	0.0774457
HNRNPF	4.31881e-06	0.2641	0.736	0.673	0.0783994
PACS1	4.32861e-06	0.279419	0.675	0.58	0.0785772
GOLGA8B	4.33392e-06	0.30603	0.69	0.664	0.0786736
CCT3	4.61781e-06	0.296171	0.807	0.777	0.0838271
CSPP1	4.63473e-06	0.272373	0.431	0.295	0.0841343
NISCH	4.97974e-06	0.273018	0.787	0.753	0.0903972
CKB	5.01279e-06	0.29043	0.772	0.643	0.0909972
CEP170	5.21121e-06	0.288603	0.756	0.669	0.0945991
CDK6	5.40722e-06	0.325351	0.797	0.747	0.0981572
SACS	5.66646e-06	0.27498	0.594	0.489	0.102863
KDM5B	5.8115e-06	0.27043	0.863	0.828	0.105496
LOC100129034	6.15649e-06	0.258923	0.381	0.251	0.111759
VANGL2	6.27279e-06	0.260179	0.365	0.244	0.11387
DPP7	6.74705e-06	0.261601	0.67	0.544	0.122479
BCLAF1	6.89649e-06	0.261872	0.843	0.821	0.125192
ZMYM4	7.33002e-06	0.257501	0.685	0.583	0.133062
SEMA3A	7.44027e-06	0.355694	0.772	0.67	0.135063
EPB41L4A-AS1	9.68225e-06	0.283398	0.69	0.572	0.175762
TOMM6	1.00816e-05	0.257109	0.909	0.878	0.183012
TMED5	1.10862e-05	0.267401	0.589	0.489	0.201247
GPR161	1.24824e-05	0.253706	0.431	0.298	0.226593
TRA2A	1.31625e-05	0.27373	0.67	0.564	0.238939
ZNF207	1.32102e-05	0.266864	0.797	0.756	0.239806
SH3D19	1.44987e-05	0.257502	0.503	0.384	0.263194
FAM126A	1.48278e-05	0.252392	0.381	0.262	0.269168
PPA1	1.6334e-05	0.273641	0.472	0.355	0.296511
SSBP1	1.64801e-05	0.269551	0.761	0.68	0.299163
THAP9-AS1	1.85476e-05	0.25988	0.604	0.499	0.336694
FYTTD1	2.05792e-05	0.250764	0.68	0.625	0.373575
ARID4B	2.25285e-05	0.262074	0.711	0.635	0.408961
XRN2	2.41937e-05	0.270056	0.706	0.655	0.439189
SURF4	2.46025e-05	0.267539	0.736	0.68	0.446609
PRPF40A	2.51182e-05	0.253284	0.838	0.793	0.455971
PRKDC	2.57989e-05	0.283062	0.756	0.718	0.468328
TAF1D	2.6167e-05	0.304485	0.467	0.355	0.475009
SUB1	2.67129e-05	0.289966	0.914	0.904	0.484919
COPB2	2.8434e-05	0.28925	0.706	0.62	0.516162
NOLC1	3.09443e-05	0.263302	0.726	0.675	0.561731
HIVEP1	3.11482e-05	0.27082	0.467	0.35	0.565434
DCTD	3.47535e-05	0.313153	0.64	0.614	0.63088
ANP32B	3.90372e-05	0.257618	0.888	0.877	0.708643
TIMM8B	4.6424e-05	0.253569	0.716	0.625	0.842735
PEA15	4.6446e-05	0.290068	0.838	0.849	0.843135
ZMAT3	5.54474e-05	0.262414	0.685	0.585	1
PSMG2	6.39766e-05	0.311773	0.685	0.602	1
STAM	6.47539e-05	0.255783	0.467	0.357	1
PPP4R3B	7.09009e-05	0.285368	0.553	0.43	1
PBX3	8.5137e-05	0.4945	0.751	0.724	1
PTPN13	9.53387e-05	0.263065	0.584	0.489	1
LSM7	0.00011303	0.273642	0.548	0.445	1
PSIP1	0.000120877	0.257906	0.701	0.678	1
SPCS3	0.000122808	0.253694	0.675	0.637	1
BAZ1A	0.000134062	0.25833	0.543	0.429	1
FZD1	0.000145199	0.307193	0.594	0.494	1
BMPR2	0.000159552	0.272428	0.838	0.809	1
LGR4	0.000159706	0.29558	0.66	0.588	1
KMT2C	0.000167535	0.268809	0.619	0.489	1
PELO	0.000172182	0.275665	0.609	0.521	1
ERCC-00096	0.000222271	0.274524	1	1	1
BARD1	0.000231675	0.404918	0.487	0.392	1
PSMA5	0.000232002	0.271901	0.792	0.811	1
DUSP1	0.000255441	0.334487	0.315	0.215	1
MEX3A	0.000332325	0.270271	0.807	0.823	1
SOX11	0.000391578	0.328096	0.604	0.521	1
ID1	0.000430061	0.257756	0.563	0.468	1
NLN	0.000440501	0.285025	0.538	0.465	1
TMEM66	0.000608715	0.554624	0.091	0.215	1
LYST	0.000735815	0.272897	0.32	0.234	1
SMC2	0.0007387	0.255724	0.431	0.348	1
TUBA1B	0.000748909	0.264823	0.995	0.982	1
SNX27	0.00093649	0.250122	0.558	0.478	1
ITSN1	0.000985737	0.280241	0.701	0.68	1
CENPF	0.00101069	0.268832	0.198	0.119	1
ROR1	0.00122538	0.324438	0.68	0.623	1
SEL1L	0.00141522	0.267766	0.594	0.539	1
ERCC-00076	0.0504442	0.280882	0.69	0.69	1

## Sheet: cluster6
	p_val	avg_log2FC	pct.1	pct.2	p_val_adj
FBN1	5.33309e-98	2.13223	0.905	0.194	9.68116e-94		as shown in Figure 7 - figure supplement 1
COL6A3	4.56778e-96	2.21819	0.889	0.177	8.29188e-92
BGN	1.33901e-95	1.94347	0.69	0.084	2.4307e-91
DNM3OS	1.61808e-92	0.987289	0.452	0.024	2.93731e-88
ISLR	1.09584e-89	0.940166	0.556	0.048	1.98928e-85
IL33	1.33825e-76	0.75544	0.341	0.014	2.42933e-72
LGALS1	2.68666e-73	1.64083	0.611	0.088	4.87709e-69
EMILIN1	7.69953e-72	1.18645	0.754	0.156	1.3977e-67
ETS1	8.30926e-70	1.08636	0.675	0.117	1.50838e-65
SYNPO	2.99127e-69	1.62886	0.889	0.274	5.43006e-65
TCF21	8.32689e-68	1.66778	0.627	0.098	1.51158e-63
PDGFRB	3.91926e-67	0.966029	0.683	0.121	7.11463e-63
COL1A2	9.24191e-67	2.83933	1	0.714	1.67768e-62
VIM	2.24882e-64	2.45118	1	0.874	4.08228e-60
GNG2	7.49301e-64	0.865331	0.516	0.065	1.36021e-59
COL1A1	1.0026e-60	2.76047	1	0.9	1.82002e-56
PCDH18	3.73834e-59	1.15306	0.69	0.147	6.7862e-55
LOX	3.07516e-58	1.40975	0.611	0.109	5.58234e-54
HEYL	1.16352e-57	0.790104	0.452	0.054	2.11214e-53
SERPINE2	1.20306e-56	1.9479	0.754	0.207	2.18391e-52
ASPN	6.18655e-54	0.612633	0.222	0.008	1.12305e-49
FAM212A	6.67799e-54	0.276176	0.27	0.014	1.21226e-49
TPM4	1.45928e-51	1.65262	1	0.868	2.64904e-47
MFAP4	3.88141e-51	2.32645	0.905	0.43	7.04592e-47
MMP2	2.95566e-50	1.26066	0.881	0.325	5.3654e-46
SEZ6L2	5.75996e-50	0.744331	0.651	0.148	1.04561e-45
FN1	3.08561e-49	2.30507	0.984	0.686	5.60132e-45
FBLN2	6.85719e-48	1.36244	0.841	0.315	1.24479e-43
TMSB10	2.65778e-47	1.33916	0.992	0.948	4.82467e-43
SEMA3D	6.26591e-46	1.01098	0.722	0.21	1.13745e-41
ACTG2	8.56388e-46	2.30861	0.317	0.032	1.5546e-41
EHD2	4.11806e-44	0.965906	0.762	0.255	7.47551e-40
COL6A2	6.35512e-44	1.40752	0.944	0.638	1.15365e-39
SH3BGRL3	1.83871e-43	1.25975	0.96	0.654	3.33782e-39
CD248	1.18096e-42	0.427675	0.413	0.061	2.1438e-38
STMN2	2.49925e-42	0.915813	0.246	0.018	4.53688e-38
SPARC	3.30006e-42	1.54567	1	0.914	5.9906e-38
SPON2	2.03471e-41	0.53086	0.206	0.011	3.69361e-37
ACTB	2.0647e-41	1.50492	1	0.974	3.74805e-37
ITGA1	4.82479e-41	1.0283	0.722	0.228	8.75844e-37
TRIM38	5.49561e-41	0.359981	0.325	0.038	9.97617e-37
MARCKS	1.05966e-40	1.52504	1	0.681	1.9236e-36
MFAP2	2.09117e-40	1.29265	0.952	0.653	3.7961e-36
FTL	1.54565e-39	1.21452	1	0.969	2.80582e-35
PDLIM3	2.23865e-39	2.16127	0.944	0.632	4.06382e-35
PLXDC1	3.4831e-39	0.674176	0.476	0.098	6.32287e-35
LRRC17	3.57426e-39	0.820514	0.587	0.15	6.48835e-35
ELN	4.33466e-39	0.541444	0.286	0.029	7.86872e-35
ENC1	1.1899e-38	1.07881	0.556	0.136	2.16003e-34
GLIPR2	1.21219e-38	0.628388	0.635	0.175	2.20049e-34
MAP2	1.22998e-38	0.642767	0.516	0.111	2.23278e-34
ANGPTL2	1.89668e-38	0.576355	0.468	0.091	3.44304e-34
CSPG4	2.48706e-38	0.468912	0.444	0.083	4.51477e-34
SSC5D	9.8305e-38	0.52216	0.413	0.071	1.78453e-33
TUBA1A	1.24707e-37	1.36707	0.984	0.821	2.26381e-33
RNASE1	1.32088e-37	0.478196	0.294	0.033	2.39779e-33
COL3A1	1.7891e-37	1.41529	0.992	0.77	3.24776e-33
TMSB4X	3.93585e-37	1.38654	1	0.741	7.14475e-33
PLK2	6.03955e-37	1.02898	0.603	0.167	1.09636e-32
WISP1	1.43042e-36	0.835774	0.492	0.108	2.59664e-32
S100A11	2.13464e-36	0.948702	0.992	0.575	3.87501e-32
LTBP4	2.77246e-36	1.27983	0.857	0.494	5.03284e-32
PLAT	3.33347e-36	0.920633	0.587	0.151	6.05125e-32
THY1	5.06158e-36	0.536685	0.437	0.081	9.18828e-32
LIPA	8.67599e-36	0.64478	0.667	0.213	1.57495e-31
FLNA	9.44915e-36	1.33202	0.952	0.762	1.7153e-31
SERPINH1	1.6662e-35	1.03027	0.968	0.839	3.02465e-31
SULF1	2.06138e-35	1.86995	0.714	0.253	3.74202e-31
SOX9	5.19792e-35	0.934085	0.437	0.089	9.43578e-31
SLN	5.58722e-35	1.5817	0.587	0.17	1.01425e-30
CSRP2	2.41872e-34	1.27269	0.952	0.758	4.3907e-30
ITGA11	1.03872e-33	0.379976	0.357	0.054	1.88559e-29
TIMP1	1.48375e-33	1.39119	0.976	0.819	2.69345e-29
RRBP1	4.65408e-33	0.838338	0.778	0.373	8.44855e-29
TAGLN	4.89522e-33	2.46336	0.889	0.643	8.88629e-29
TUBB	1.25306e-32	0.953595	1	0.982	2.27468e-28
TNC	1.42705e-32	1.66011	0.675	0.243	2.59052e-28
NOTCH3	1.69317e-32	0.879315	0.857	0.438	3.07362e-28
ITGA5	2.41991e-32	0.782396	0.778	0.354	4.39287e-28
ACTG1	4.88541e-32	1.0951	1	0.984	8.86848e-28
AQP3	6.77469e-32	0.369914	0.222	0.021	1.22981e-27
GNAI2	8.40696e-32	0.90879	0.952	0.812	1.52612e-27
KLF6	1.31623e-31	1.31498	0.913	0.531	2.38936e-27
COL9A3	1.86242e-31	0.932952	0.659	0.204	3.38086e-27
PIEZO2	2.10791e-31	0.352518	0.317	0.048	3.82648e-27
PLTP	2.23315e-31	0.879173	0.833	0.427	4.05383e-27
IFITM3	3.05623e-31	0.972726	1	0.955	5.54797e-27
COL5A1	4.21654e-31	1.00773	0.929	0.564	7.65429e-27
FAM129A	7.30464e-31	0.57357	0.413	0.088	1.32601e-26
SNCAIP	7.57352e-31	0.583664	0.492	0.123	1.37482e-26
CDH11	9.4229e-31	1.04155	0.802	0.412	1.71054e-26
CCDC3	2.63972e-30	1.22422	0.627	0.236	4.79188e-26
ADGRA2	4.05556e-30	0.625046	0.587	0.185	7.36206e-26
HLA-A	4.33536e-30	0.971036	0.873	0.598	7.86999e-26
MGP	4.69431e-30	1.54221	0.389	0.081	8.52159e-26
TUBB3	6.68066e-30	0.603428	0.563	0.172	1.21274e-25
ACTN1	6.82651e-30	1.38696	0.937	0.78	1.23922e-25
TM4SF1	7.32023e-30	0.8541	0.413	0.088	1.32884e-25
RAMP2	1.89191e-29	0.484212	0.563	0.163	3.43439e-25
LRRC32	2.49107e-29	0.618854	0.54	0.159	4.52205e-25
APLNR	3.7447e-29	0.412732	0.214	0.022	6.79776e-25
FSTL1	4.98585e-29	1.01229	0.992	0.962	9.05082e-25
ARAP3	5.34777e-29	0.296454	0.373	0.072	9.70781e-25
NOTCH1	5.52485e-29	0.478359	0.54	0.156	1.00293e-24
SAT1	6.31368e-29	0.934538	0.746	0.376	1.14612e-24
PCOLCE	7.40532e-29	0.801702	0.714	0.301	1.34429e-24
CD81	1.22545e-28	0.726474	0.992	0.95	2.22456e-24
MYH10	1.46308e-28	1.37076	0.984	0.924	2.65593e-24
MECOM	1.67087e-28	0.961886	0.508	0.15	3.03313e-24
TAGLN2	1.82769e-28	0.695499	0.675	0.238	3.31781e-24
TFPI	2.48618e-28	0.659101	0.579	0.202	4.51317e-24
ANXA5	2.48805e-28	0.983526	0.976	0.853	4.51656e-24
ANO4	2.98622e-28	0.320133	0.325	0.058	5.42088e-24
LIMD2	4.90573e-28	0.672211	0.786	0.374	8.90537e-24
COL5A2	5.99111e-28	1.07723	0.937	0.639	1.08757e-23
PLS3	6.74089e-28	1.02743	0.873	0.522	1.22367e-23
CTHRC1	7.49034e-28	0.773433	0.659	0.228	1.35972e-23
PAPPA	1.29708e-27	0.673494	0.484	0.138	2.35458e-23
CALU	1.47694e-27	0.81734	0.96	0.881	2.68108e-23
MRC2	1.61595e-27	0.811172	0.905	0.561	2.93344e-23
SGCD	2.08284e-27	0.344268	0.262	0.038	3.78099e-23
SERTAD4-AS1	3.3806e-27	0.313798	0.365	0.073	6.1368e-23
RHOJ	4.5748e-27	0.409608	0.341	0.066	8.30464e-23
RPL10	4.74575e-27	0.595515	1	1	8.61496e-23
LAMC3	6.60738e-27	0.388045	0.333	0.064	1.19944e-22
OLFML2A	1.11602e-26	0.974113	0.857	0.48	2.0259e-22
NFIX	1.1343e-26	0.283381	0.302	0.051	2.0591e-22
HMGA2	1.14331e-26	1.0022	0.968	0.753	2.07545e-22
ITPR1	1.25505e-26	0.322837	0.333	0.064	2.2783e-22
RRAS	1.34784e-26	0.749189	0.778	0.427	2.44674e-22
FAM114A1	1.42633e-26	0.668096	0.802	0.434	2.58921e-22
ARPC2	1.48754e-26	0.756365	0.976	0.976	2.70033e-22
FSCN1	1.76918e-26	0.895426	0.944	0.846	3.2116e-22
CDKN2B	2.55876e-26	0.541711	0.341	0.069	4.64491e-22
KDELR3	3.3627e-26	0.671907	0.659	0.29	6.10431e-22
KLHDC8A	4.25609e-26	0.27904	0.143	0.009	7.72608e-22
CDC42EP1	4.38878e-26	0.683251	0.698	0.288	7.96695e-22
COL8A1	6.66756e-26	0.567193	0.286	0.049	1.21036e-21
COL9A2	7.29134e-26	0.855178	0.278	0.047	1.3236e-21
NRK	8.7441e-26	0.38963	0.31	0.056	1.58732e-21
SCN7A	1.25778e-25	0.372442	0.302	0.053	2.28325e-21
MARCH4	1.76954e-25	0.29411	0.151	0.011	3.21225e-21
SH2D3C	2.16116e-25	0.5161	0.437	0.111	3.92316e-21
CRMP1	2.48246e-25	0.409319	0.381	0.086	4.5064e-21
FMNL3	2.51561e-25	0.397032	0.389	0.093	4.56658e-21
MYH9	2.88611e-25	1.06752	0.952	0.799	5.23915e-21
MARCKSL1	3.36366e-25	0.683408	0.992	0.935	6.10606e-21
FTH1	4.61921e-25	0.743316	1	0.992	8.38525e-21
HEY1	4.76198e-25	0.850485	0.571	0.206	8.64442e-21
MSN	4.98443e-25	0.821858	0.81	0.551	9.04823e-21
GJA1	5.25137e-25	0.5653	0.603	0.193	9.53281e-21
EVA1B	8.25874e-25	0.641439	0.667	0.277	1.49921e-20
LITAF	1.03521e-24	1.00041	0.841	0.535	1.87921e-20
CAP1	1.12421e-24	0.805973	0.905	0.775	2.04078e-20
RHOA	1.14897e-24	0.614054	0.984	0.954	2.08573e-20
GRIN2D	1.5313e-24	0.297398	0.357	0.079	2.77977e-20
SNAI2	1.69986e-24	0.784015	0.619	0.24	3.08576e-20
LASP1	1.70874e-24	0.889828	0.857	0.502	3.10187e-20
COLEC11	1.7323e-24	0.412277	0.27	0.046	3.14465e-20
PTGDS	2.04264e-24	1.2073	0.627	0.244	3.70801e-20
COL4A1	2.07986e-24	1.40242	0.905	0.795	3.77557e-20
UCHL1	2.22477e-24	0.994261	0.865	0.618	4.03863e-20
RHOBTB1	2.43326e-24	0.604892	0.651	0.273	4.4171e-20
CKAP4	2.80141e-24	0.70685	0.952	0.877	5.0854e-20
KCNE4	2.85984e-24	0.427149	0.317	0.063	5.19147e-20
CD63	3.80817e-24	0.675355	1	0.949	6.91297e-20
MXRA8	3.87786e-24	0.775452	0.817	0.463	7.03947e-20
TRPS1	4.03453e-24	0.718638	0.698	0.326	7.32389e-20
PEAR1	4.80729e-24	0.375447	0.357	0.081	8.72668e-20
ARHGEF40	5.09279e-24	0.783087	0.802	0.458	9.24494e-20
SEC31A	5.69856e-24	0.672634	0.976	0.874	1.03446e-19
NEK6	5.78465e-24	0.52686	0.508	0.172	1.05009e-19
PENK	5.78912e-24	2.96049	0.278	0.052	1.0509e-19
COL6A1	6.21906e-24	1.09715	0.968	0.872	1.12895e-19
KDELR2	6.45779e-24	0.70072	0.944	0.745	1.17228e-19
P2RY1	6.87597e-24	0.645313	0.429	0.122	1.2482e-19
DLK1	9.51118e-24	1.32113	0.317	0.066	1.72656e-19
CREB3L1	1.08055e-23	0.699808	0.69	0.301	1.96152e-19
THBS2	3.04499e-23	0.288415	0.151	0.013	5.52758e-19
SOX6	3.10313e-23	0.579877	0.548	0.18	5.63311e-19
VCAN	3.28836e-23	1.23808	1	0.878	5.96936e-19
SOX4	3.88588e-23	1.16712	0.992	0.924	7.05404e-19
ARPC1B	4.18684e-23	0.584338	0.683	0.313	7.60037e-19
RAC1	4.38623e-23	0.616681	0.984	0.957	7.96232e-19
LAMB1	8.66234e-23	1.07429	0.833	0.482	1.57248e-18
COTL1	9.35179e-23	0.514216	0.484	0.151	1.69763e-18
DOK5	1.02664e-22	0.390684	0.373	0.091	1.86366e-18
PHLDA1	1.16623e-22	1.17002	0.675	0.349	2.11705e-18
TUBA1B	1.35264e-22	0.910054	1	0.982	2.45544e-18
SEC24D	1.54557e-22	0.666288	0.706	0.342	2.80568e-18
ID4	3.30533e-22	0.931787	0.841	0.504	6.00017e-18
ANTXR1	4.36416e-22	0.683872	0.802	0.501	7.92227e-18
MAGED2	5.28092e-22	0.745347	0.968	0.939	9.58646e-18
NID1	6.47868e-22	0.731475	0.802	0.481	1.17607e-17
TPM3	6.72449e-22	0.687429	0.905	0.63	1.2207e-17
CALD1	7.08381e-22	1.29274	0.96	0.887	1.28592e-17
FXYD5	8.73798e-22	0.473779	0.635	0.249	1.58621e-17
TCEAL7	9.39609e-22	0.523406	0.556	0.218	1.70567e-17
RAB30	1.27557e-21	0.442212	0.46	0.143	2.31555e-17
SHC1	2.0822e-21	0.674094	0.786	0.48	3.77982e-17
ARPC5	2.85353e-21	0.735654	0.897	0.743	5.18001e-17
SDC3	3.53247e-21	0.505818	0.651	0.288	6.41249e-17
C4orf48	4.29089e-21	0.690489	0.833	0.527	7.78925e-17
TIMP2	4.42612e-21	0.743205	0.81	0.549	8.03474e-17
RPS20	4.46759e-21	0.562771	1	0.998	8.11001e-17
SSR2	4.70035e-21	0.650388	0.929	0.837	8.53254e-17
SEPT6	4.7824e-21	0.703553	0.659	0.292	8.68149e-17
RPS6	4.95044e-21	0.581856	1	0.999	8.98654e-17
MIR100HG	6.00764e-21	0.711769	0.817	0.506	1.09057e-16
PRELP	6.75964e-21	0.593335	0.357	0.096	1.22708e-16
RPS12	7.50734e-21	0.61167	1	0.997	1.36281e-16
RPL28	7.53224e-21	0.577159	1	0.982	1.36733e-16
TRAF5	7.65961e-21	0.563105	0.563	0.224	1.39045e-16
ANXA1	9.46884e-21	0.409358	0.698	0.283	1.71888e-16
ITGAV	1.02586e-20	1.04884	0.889	0.789	1.86224e-16
GBP4	1.19019e-20	0.602798	0.524	0.199	2.16056e-16
COL4A2	1.47821e-20	1.0731	0.984	0.944	2.68339e-16
RPL15	1.93609e-20	0.498101	1	1	3.51458e-16
EMP3	2.01433e-20	0.719632	0.817	0.523	3.65661e-16
BMP1	2.15697e-20	0.513956	0.651	0.295	3.91554e-16
GLT8D2	2.21807e-20	0.364495	0.302	0.068	4.02647e-16
GEM	2.42482e-20	0.695481	0.46	0.16	4.40178e-16
FKBP10	2.79981e-20	0.782612	0.849	0.578	5.08249e-16
KITLG	3.00585e-20	0.442637	0.254	0.049	5.45651e-16
ZEB2	3.21091e-20	0.656245	0.706	0.364	5.82877e-16
EDIL3	3.31543e-20	1.00419	0.468	0.171	6.01851e-16
ECE1	3.69588e-20	0.626435	0.706	0.359	6.70914e-16
SOX8	4.38847e-20	0.275741	0.23	0.039	7.9664e-16
LRRC4C	4.68125e-20	0.251402	0.222	0.037	8.49787e-16
ARF4	7.54112e-20	0.663826	0.944	0.885	1.36894e-15
SFXN3	8.5257e-20	0.378046	0.405	0.123	1.54767e-15
TPM2	9.14571e-20	0.946043	0.976	0.894	1.66022e-15
STK38L	1.093e-19	0.869468	0.698	0.411	1.98412e-15
FHL3	1.19552e-19	0.481533	0.556	0.241	2.17023e-15
ACTA2	1.29771e-19	2.18444	0.762	0.524	2.35572e-15
MN1	1.43584e-19	0.416957	0.516	0.178	2.60648e-15
GBP2	1.46889e-19	0.423128	0.286	0.063	2.66647e-15
CYBRD1	1.5424e-19	0.331208	0.421	0.126	2.79992e-15
DACT1	1.55746e-19	0.756504	0.603	0.275	2.82726e-15
PXDN	1.62015e-19	0.70106	0.921	0.844	2.94106e-15
KANK2	1.83294e-19	0.681912	0.849	0.573	3.32734e-15
ZYX	1.99688e-19	0.891262	0.944	0.865	3.62493e-15
MEGF6	2.08809e-19	0.320528	0.357	0.095	3.79051e-15
ANKRD50	2.55186e-19	0.778586	0.833	0.618	4.63239e-15
ITGA8	2.70526e-19	0.41921	0.19	0.029	4.91086e-15
FGFR1	3.47754e-19	0.633124	0.794	0.482	6.31279e-15
RPL6	4.00578e-19	0.520969	1	0.996	7.2717e-15
RPL37	5.3197e-19	0.596926	1	0.998	9.65685e-15
KCNK6	5.51869e-19	0.286973	0.317	0.079	1.00181e-14
HDLBP	1.24136e-18	0.624701	0.984	0.931	2.25344e-14
FOXC1	1.38285e-18	0.567881	0.548	0.217	2.51028e-14
MICAL1	1.48955e-18	0.285204	0.373	0.107	2.70397e-14
IQGAP1	1.73956e-18	0.664898	0.802	0.469	3.15782e-14
GUCY1A2	1.8181e-18	0.836812	0.532	0.203	3.3004e-14
FILIP1L	2.2972e-18	0.740422	0.548	0.218	4.17011e-14
IGFBP2	2.34373e-18	0.782159	0.873	0.58	4.25457e-14
PPIA	3.06775e-18	0.445418	1	0.998	5.56889e-14
NFIA	3.14968e-18	0.853393	0.833	0.538	5.71761e-14
ITGB1	3.18749e-18	0.641737	0.984	0.969	5.78625e-14
TWIST1	3.77797e-18	0.774937	0.444	0.164	6.85815e-14
ELK3	3.85507e-18	0.478547	0.5	0.201	6.9981e-14
RPL27A	3.95376e-18	0.489964	1	0.994	7.17726e-14
FAM129B	4.21847e-18	0.535031	0.778	0.448	7.65779e-14
LTBP2	4.35957e-18	0.268014	0.206	0.036	7.91393e-14
FCGRT	5.17142e-18	0.510458	0.738	0.413	9.38768e-14
TCF12	5.59828e-18	0.754093	0.794	0.547	1.01626e-13
TPT1	5.90428e-18	0.405971	1	0.999	1.0718e-13
ROBO2	6.87666e-18	0.473007	0.405	0.128	1.24832e-13
BCL2A1	6.89745e-18	0.252345	0.151	0.019	1.25209e-13
ITM2B	7.72638e-18	0.599043	1	0.975	1.40257e-13
BTG3	8.23789e-18	0.571836	0.841	0.555	1.49542e-13
SCARB2	9.07701e-18	0.698602	0.897	0.784	1.64775e-13
CNKSR3	9.36011e-18	0.371113	0.452	0.163	1.69914e-13
PHGDH	1.05361e-17	0.631672	0.698	0.369	1.91261e-13
BCAT1	1.12994e-17	0.788525	0.841	0.564	2.05119e-13
RPLP2	1.15216e-17	0.467393	1	0.989	2.09152e-13
TMOD3	1.31956e-17	0.455475	0.563	0.248	2.39539e-13
ENG	1.35906e-17	0.412111	0.365	0.108	2.4671e-13
RGL1	1.37735e-17	0.57555	0.611	0.295	2.5003e-13
DSC3	1.61465e-17	0.750502	0.579	0.271	2.93107e-13
PLAGL1	1.62293e-17	0.337125	0.389	0.12	2.9461e-13
RGS2	2.0402e-17	0.742378	0.389	0.127	3.70357e-13
VAT1	2.3039e-17	0.565699	0.794	0.534	4.18227e-13
SHISA5	2.30837e-17	0.561852	0.897	0.693	4.19038e-13
CFL1	2.55626e-17	0.491624	1	0.998	4.64037e-13
SDC2	2.67052e-17	0.790464	0.802	0.573	4.8478e-13
DYNC1I2	2.70177e-17	0.521915	0.937	0.848	4.90452e-13
MAGED1	2.80091e-17	0.524848	0.984	0.956	5.08448e-13
IFITM1	3.21245e-17	0.786142	0.738	0.418	5.83155e-13
SEMA5B	3.5583e-17	0.350778	0.286	0.07	6.45938e-13
STMN1	4.42202e-17	0.582097	0.968	0.954	8.02729e-13
NGFR	4.73551e-17	0.723256	0.373	0.12	8.59638e-13
MICAL2	4.89792e-17	0.807532	0.929	0.763	8.8912e-13
RCN1	5.138e-17	0.69436	0.857	0.619	9.32701e-13
OGN	5.14305e-17	0.436618	0.111	0.01	9.33617e-13
TLN1	5.77611e-17	0.682585	0.913	0.87	1.04854e-12
LIMA1	6.09769e-17	0.435301	0.683	0.311	1.10691e-12
RPL34	6.67768e-17	0.471189	1	0.999	1.2122e-12
GATA5	6.97593e-17	0.550596	0.643	0.319	1.26634e-12
ROBO1	7.3568e-17	0.71639	0.667	0.354	1.33548e-12
KCTD12	8.22244e-17	1.32959	0.746	0.493	1.49262e-12
COL21A1	8.51563e-17	0.566024	0.556	0.237	1.54584e-12
PPP1R14A	9.37483e-17	0.40577	0.46	0.175	1.70181e-12
NRARP	1.11321e-16	0.412212	0.286	0.073	2.02081e-12
PXDC1	1.17437e-16	0.492816	0.556	0.248	2.13184e-12
P4HB	1.21498e-16	0.620263	0.889	0.822	2.20556e-12
RPS19	1.43349e-16	0.504058	1	0.98	2.60222e-12
EIF4G2	1.57908e-16	0.410436	1	0.997	2.8665e-12
KCNMB1	1.64168e-16	0.329546	0.198	0.037	2.98013e-12
TSPO	1.66306e-16	0.255499	0.349	0.104	3.01895e-12
LOC100129034	1.85926e-16	0.512473	0.54	0.244	3.37512e-12
GOLT1B	3.18451e-16	0.5233	0.698	0.405	5.78084e-12
CDK2AP1	3.19733e-16	0.621475	0.881	0.78	5.80412e-12
RPS21	3.59885e-16	0.539391	0.984	0.959	6.533e-12
JPH4	3.84876e-16	0.421402	0.302	0.083	6.98665e-12
CHSY1	4.03885e-16	0.688567	0.825	0.594	7.33172e-12
IGFBP4	4.76918e-16	0.440916	0.651	0.311	8.65749e-12
RPL9	5.3963e-16	0.455497	1	0.998	9.7959e-12
MYRF	6.08916e-16	0.494356	0.944	0.732	1.10537e-11
DSEL	6.57132e-16	0.516098	0.587	0.277	1.19289e-11
PDLIM7	7.06964e-16	0.710795	0.889	0.77	1.28335e-11
MEIS3	9.08887e-16	0.401303	0.563	0.261	1.6499e-11
OSTC	9.25383e-16	0.600714	0.952	0.828	1.67985e-11
DPY19L3	1.02437e-15	0.460492	0.627	0.32	1.85953e-11
GPC3	1.09422e-15	0.921912	0.778	0.488	1.98634e-11
ADCY7	1.15954e-15	0.31258	0.452	0.175	2.10491e-11
STK17B	1.22116e-15	0.462878	0.373	0.123	2.21677e-11
ACOT7	1.3961e-15	0.342127	0.444	0.167	2.53433e-11
SERF2	1.75645e-15	0.608852	0.992	0.989	3.18848e-11
PELO	1.80598e-15	0.907954	0.746	0.514	3.27839e-11
LEFTY2	1.83072e-15	1.20614	0.437	0.173	3.32331e-11
DYNC1LI2	1.95799e-15	0.490757	0.889	0.728	3.55434e-11
CDC42EP5	2.34518e-15	0.446642	0.563	0.263	4.2572e-11
ITPRIPL2	2.71381e-15	0.432269	0.556	0.255	4.92638e-11
SEC61B	2.87938e-15	0.571598	0.929	0.747	5.22694e-11
LOXL1	3.12823e-15	0.564398	0.579	0.279	5.67867e-11
SERP1	3.2241e-15	0.524936	0.865	0.671	5.85271e-11
EML3	3.22763e-15	0.37337	0.5	0.215	5.85912e-11
RPL27	3.60825e-15	0.46299	1	0.992	6.55005e-11
GPX8	4.00695e-15	0.652562	0.81	0.608	7.27382e-11
GDF6	4.05968e-15	0.63386	0.421	0.161	7.36954e-11
RAB31	4.09719e-15	0.608801	0.865	0.637	7.43764e-11
IL11RA	4.11921e-15	0.5678	0.77	0.538	7.47761e-11
FHL1	4.2661e-15	1.02463	0.802	0.634	7.74425e-11
HAPLN1	5.80731e-15	1.33885	0.405	0.154	1.0542e-10
CHST3	6.12914e-15	0.348055	0.476	0.191	1.11262e-10
KLF2	6.13244e-15	0.31364	0.325	0.1	1.11322e-10
PGM3	6.40106e-15	0.504911	0.746	0.498	1.16198e-10
CTSK	7.69368e-15	0.315213	0.246	0.061	1.39663e-10
CRTAP	7.72175e-15	0.508514	0.937	0.863	1.40173e-10
GSTP1	8.60166e-15	0.524746	0.952	0.907	1.56146e-10
TUBB2A	8.64934e-15	0.560683	0.611	0.315	1.57012e-10
TGFB1	1.02271e-14	0.372811	0.571	0.274	1.85653e-10
PTPRG	1.16259e-14	0.258287	0.333	0.106	2.11046e-10
CDKN1A	1.22663e-14	0.518264	0.532	0.241	2.22671e-10
TGFBR1	1.25922e-14	0.656015	0.786	0.551	2.28586e-10
ANKRD6	1.26653e-14	0.255037	0.373	0.127	2.29914e-10
PTN	1.34751e-14	0.617388	0.881	0.689	2.44613e-10
RPL12	1.42749e-14	0.512284	1	0.983	2.59132e-10
S100A10	1.47645e-14	0.353256	0.897	0.534	2.68019e-10
DPYSL3	1.57586e-14	0.66889	0.905	0.783	2.86065e-10
WSB1	1.90495e-14	0.556285	1	0.959	3.45806e-10
APLP1	1.94568e-14	0.350771	0.651	0.317	3.53198e-10
OST4	2.01738e-14	0.489889	0.968	0.919	3.66215e-10
RPS7	2.02453e-14	0.443532	1	0.999	3.67514e-10
RPL18A	2.10507e-14	0.397272	1	0.999	3.82134e-10
RPS29	2.32214e-14	0.46566	1	0.996	4.21538e-10
TTC3	2.81251e-14	0.605012	0.944	0.916	5.10556e-10
SULT1E1	2.8142e-14	0.382003	0.119	0.015	5.10862e-10
RHOB	3.22487e-14	0.442019	0.548	0.254	5.8541e-10
PFN1	3.2698e-14	0.528787	0.992	0.992	5.93566e-10
CNRIP1	3.3471e-14	0.314322	0.476	0.19	6.076e-10
CSDC2	4.15893e-14	0.38042	0.413	0.156	7.5497e-10
HAS2	4.73337e-14	0.266047	0.23	0.056	8.59249e-10
AHNAK	5.48003e-14	0.481215	0.937	0.738	9.9479e-10
RBM3	5.56203e-14	0.625239	0.873	0.703	1.00967e-09
COL15A1	5.6421e-14	0.279178	0.127	0.018	1.02421e-09
ENAH	6.00131e-14	0.634887	0.968	0.933	1.08942e-09
RPL13	6.31036e-14	0.423108	1	0.997	1.14552e-09
SPRED1	6.77725e-14	0.438773	0.548	0.265	1.23027e-09
RPL7A	6.90949e-14	0.40239	1	0.999	1.25428e-09
SH3BGRL	7.17384e-14	0.538186	0.873	0.73	1.30227e-09
RPL3	7.41613e-14	0.42168	1	0.995	1.34625e-09
PTBP1	8.67813e-14	0.43458	0.929	0.656	1.57534e-09
RPL30	9.32175e-14	0.435908	1	0.996	1.69218e-09
RPL39	1.00429e-13	0.450351	1	0.983	1.82309e-09
FLNB	1.0755e-13	0.506215	0.698	0.403	1.95236e-09
SLITRK4	1.09068e-13	0.596967	0.532	0.256	1.97992e-09
RPL19	1.14625e-13	0.408204	1	0.991	2.08079e-09
RAB23	1.15743e-13	0.461214	0.595	0.32	2.10108e-09
NT5DC2	1.1721e-13	0.568539	0.841	0.688	2.12771e-09
ARPC4	1.27478e-13	0.459904	0.825	0.65	2.31412e-09
CERCAM	1.30186e-13	0.456464	0.746	0.473	2.36327e-09
ST6GALNAC5	1.31261e-13	0.435466	0.262	0.074	2.38278e-09
ACTR2	1.37015e-13	0.490502	0.905	0.773	2.48724e-09
GRIA4	1.40915e-13	0.259907	0.262	0.071	2.55802e-09
C3orf58	1.48583e-13	0.684167	0.794	0.541	2.69722e-09
LOXL2	1.50639e-13	0.535075	0.643	0.347	2.73455e-09
P3H1	1.53583e-13	0.319747	0.381	0.146	2.78799e-09
MAP3K1	1.80063e-13	0.628134	0.683	0.445	3.26868e-09
NFIB	1.83956e-13	0.633766	0.881	0.753	3.33935e-09
ARPC3	1.9183e-13	0.442156	0.897	0.745	3.48229e-09
TGFB1I1	1.95042e-13	0.57814	0.794	0.581	3.5406e-09
CMTM3	2.06119e-13	0.52566	0.825	0.616	3.74167e-09
RPS3A	2.17869e-13	0.396267	1	0.999	3.95498e-09
FLRT2	2.21323e-13	0.711077	0.849	0.65	4.01767e-09
RPS27A	2.32228e-13	0.418501	1	0.998	4.21564e-09
COL14A1	2.38256e-13	0.564029	0.516	0.238	4.32505e-09
GPC6	2.63461e-13	0.638896	0.627	0.385	4.7826e-09
HEY2	2.76378e-13	0.381128	0.381	0.135	5.01709e-09
GAP43	2.80353e-13	0.486476	0.31	0.099	5.08925e-09
TTYH3	2.84922e-13	0.471197	0.802	0.618	5.17219e-09
ADAMTS5	2.9032e-13	0.65908	0.389	0.14	5.27019e-09
UGDH	3.25966e-13	0.422366	0.714	0.451	5.91727e-09
FKBP7	3.3119e-13	0.413457	0.556	0.286	6.01209e-09
YWHAZ	3.41238e-13	0.447331	0.992	0.989	6.1945e-09
RPL36	3.71698e-13	0.443635	0.992	0.971	6.74743e-09
CMTM6	4.04345e-13	0.385462	0.794	0.566	7.34007e-09
SND1	4.59848e-13	0.508361	0.881	0.736	8.34763e-09
FMOD	5.1282e-13	0.605234	0.317	0.111	9.30922e-09
CNN3	5.2105e-13	0.499531	0.802	0.578	9.45863e-09
LOC728392	5.36768e-13	0.454453	0.611	0.343	9.74395e-09
NOTCH2	5.65111e-13	0.495761	0.714	0.456	1.02585e-08
PPP1R18	6.53093e-13	0.471824	0.738	0.472	1.18556e-08
COL16A1	6.62253e-13	0.444774	0.579	0.317	1.20219e-08
CLTA	7.2717e-13	0.514214	0.833	0.665	1.32003e-08
EPHX1	7.61553e-13	0.265747	0.437	0.179	1.38245e-08
GNB1	8.03278e-13	0.435173	0.937	0.88	1.45819e-08
FNDC3B	8.84553e-13	0.576534	0.81	0.694	1.60573e-08
SACS	9.21638e-13	0.71249	0.706	0.484	1.67305e-08
CLIC1	1.21678e-12	0.532872	0.849	0.717	2.20882e-08
TBX18	1.23165e-12	0.36715	0.738	0.384	2.23581e-08
GALNT10	1.30874e-12	0.354121	0.548	0.263	2.37576e-08
MAN2B2	1.46536e-12	0.250316	0.421	0.174	2.66007e-08
CREB3L2	1.48144e-12	0.443111	0.706	0.476	2.68926e-08
DCN	1.52608e-12	1.6352	0.389	0.158	2.77029e-08
RPS23	1.53013e-12	0.389247	1	0.999	2.77765e-08
PMM2	1.54593e-12	0.269741	0.405	0.169	2.80633e-08
RAB5C	1.59316e-12	0.409001	0.627	0.359	2.89206e-08
EFNB1	1.59564e-12	0.457852	0.595	0.332	2.89657e-08
ADAM9	1.77937e-12	0.613597	0.73	0.523	3.23009e-08
RAP1B	1.98085e-12	0.486337	0.81	0.649	3.59583e-08
SERPINE1	2.20989e-12	0.771885	0.246	0.071	4.01162e-08
BEX1	2.25713e-12	0.88188	0.881	0.784	4.09738e-08
UBA52	2.52102e-12	0.398573	0.976	0.969	4.57641e-08
RNF24	2.65028e-12	0.52116	0.516	0.261	4.81105e-08
IL17D	2.79492e-12	0.289613	0.333	0.12	5.07361e-08
TPBG	2.81989e-12	0.395381	0.413	0.171	5.11894e-08
VASH2	2.89301e-12	0.310187	0.325	0.118	5.25169e-08
SEPT7	3.10752e-12	0.425354	0.96	0.938	5.64109e-08
TMEM87B	3.1306e-12	0.299717	0.381	0.152	5.68297e-08
SEPT11	3.25622e-12	0.588464	0.817	0.671	5.91101e-08
UNC5B	3.95486e-12	0.633961	0.905	0.802	7.17925e-08
MTHFD1L	4.11527e-12	0.413591	0.603	0.334	7.47044e-08
ZFP36L1	4.14496e-12	0.588575	1	0.984	7.52435e-08
PELI1	4.47957e-12	0.300141	0.421	0.183	8.13177e-08
RPL23	5.02691e-12	0.398526	1	0.996	9.12535e-08
RPS3	5.06649e-12	0.379105	1	0.991	9.1972e-08
SERPINB9	5.71294e-12	0.314337	0.595	0.299	1.03707e-07
S100A6	5.72446e-12	0.614423	0.659	0.416	1.03916e-07
RPS27	7.43411e-12	0.398867	1	0.997	1.34951e-07
IGFBP7	7.56779e-12	0.936773	0.794	0.583	1.37378e-07
RARG	7.66419e-12	0.286057	0.381	0.151	1.39128e-07
ZBTB8A	1.01501e-11	0.602728	0.611	0.376	1.84255e-07
RPL7	1.14366e-11	0.298385	1	0.997	2.07609e-07
ATP1B3	1.1498e-11	0.523538	0.849	0.702	2.08722e-07
ADAMTS10	1.15185e-11	0.294409	0.468	0.219	2.09095e-07
TNS1	1.20908e-11	0.453425	0.683	0.451	2.19484e-07
VCL	1.21929e-11	0.531476	0.929	0.897	2.21337e-07
CHPF	1.24094e-11	0.548625	0.722	0.536	2.25268e-07
C1orf54	1.26292e-11	0.353972	0.524	0.265	2.29258e-07
RHOC	1.26657e-11	0.493156	0.865	0.752	2.29921e-07
RPL11	1.2973e-11	0.329444	1	0.996	2.35499e-07
ITM2C	1.31431e-11	0.537084	0.968	0.933	2.38586e-07
DLGAP4	1.32315e-11	0.447796	0.786	0.591	2.40192e-07
PAPSS2	1.44245e-11	0.271175	0.365	0.142	2.61847e-07
NCCRP1	1.53622e-11	0.648493	0.548	0.286	2.78869e-07
NYNRIN	1.55319e-11	0.391576	0.81	0.594	2.8195e-07
SULF2	1.59819e-11	0.490193	0.452	0.196	2.90119e-07
DAD1	1.85618e-11	0.373909	0.897	0.792	3.36952e-07
DNM1	1.8759e-11	0.344748	0.587	0.299	3.40532e-07
LMCD1	2.37264e-11	0.443886	0.373	0.155	4.30706e-07
CDK4	2.38609e-11	0.449887	0.857	0.69	4.33147e-07
VASH1	2.42507e-11	0.476065	0.73	0.478	4.40222e-07
MARVELD1	2.45535e-11	0.401875	0.651	0.402	4.45719e-07
SELENBP1	2.52562e-11	0.551004	0.556	0.312	4.58476e-07
RPS8	2.54096e-11	0.398378	1	0.997	4.6126e-07
PPP2R5B	2.54236e-11	0.257817	0.405	0.168	4.61514e-07
TUBB6	2.72996e-11	0.734138	0.706	0.507	4.9557e-07
SH3PXD2B	2.83191e-11	0.326818	0.532	0.279	5.14077e-07
RPS15A	3.146e-11	0.336236	1	0.998	5.71093e-07
IFITM2	3.26372e-11	0.480928	0.944	0.836	5.92463e-07
SEMA6A	3.29656e-11	0.754486	0.706	0.47	5.98424e-07
SPARCL1	3.32088e-11	0.45108	0.151	0.032	6.0284e-07
MTHFD2	3.56252e-11	0.319171	0.381	0.164	6.46704e-07
CTNNA1	3.96309e-11	0.424253	0.929	0.869	7.19419e-07
KIAA1211	4.09147e-11	0.371444	0.413	0.186	7.42724e-07
NUMBL	4.12553e-11	0.289578	0.381	0.16	7.48908e-07
COLGALT1	4.55808e-11	0.36171	0.437	0.214	8.27428e-07
RPL14	4.65485e-11	0.337454	1	0.996	8.44995e-07
TUBB2B	5.14534e-11	0.27884	0.31	0.113	9.34034e-07
SEC13	5.26313e-11	0.439352	0.849	0.722	9.55415e-07
PLXND1	5.63097e-11	0.303824	0.508	0.26	1.02219e-06
RIPK1	6.48396e-11	0.295488	0.444	0.2	1.17703e-06
DZIP1	6.74733e-11	0.345374	0.587	0.334	1.22484e-06
KIRREL	6.91027e-11	0.334739	0.508	0.266	1.25442e-06
CYFIP1	6.93438e-11	0.427211	0.738	0.532	1.2588e-06
ACTR3	6.98822e-11	0.480554	0.857	0.724	1.26857e-06
PRAF2	7.50253e-11	0.416122	0.817	0.626	1.36193e-06
DDX5	7.75356e-11	0.387173	1	0.964	1.4075e-06
GLI3	7.80729e-11	0.430736	0.659	0.418	1.41726e-06
RPL35A	7.83708e-11	0.390113	1	0.997	1.42267e-06
TM2D2	8.26715e-11	0.408065	0.683	0.438	1.50074e-06
RPS2	8.60827e-11	0.33877	1	0.999	1.56266e-06
PAK3	8.89394e-11	0.344333	0.325	0.128	1.61452e-06
RPL10A	8.97685e-11	0.350547	1	0.999	1.62957e-06
RCBTB2	9.29616e-11	0.382851	0.452	0.225	1.68753e-06
B4GALNT4	9.61757e-11	0.381544	0.619	0.354	1.74588e-06
CYP1B1	1.0734e-10	0.278592	0.159	0.036	1.94855e-06
CD276	1.14901e-10	0.375749	0.611	0.358	2.08579e-06
TUBA1C	1.16556e-10	0.559568	0.627	0.388	2.11584e-06
CGNL1	1.18569e-10	0.533697	0.873	0.75	2.15239e-06
AP3S1	1.22765e-10	0.459936	0.706	0.546	2.22855e-06
WBP1L	1.38461e-10	0.339282	0.675	0.432	2.51348e-06
CDR2	1.50421e-10	0.351746	0.405	0.178	2.73058e-06
MYO9B	1.57028e-10	0.377442	0.587	0.355	2.85053e-06
NFATC4	1.6141e-10	0.358262	0.667	0.406	2.93008e-06
SURF4	1.65272e-10	0.435154	0.81	0.676	3.00018e-06
TNFAIP2	1.68331e-10	0.283738	0.254	0.084	3.05572e-06
HLA-B	1.80369e-10	0.311736	0.421	0.191	3.27423e-06
RPL32	2.27923e-10	0.358433	1	0.995	4.13749e-06
ARL4D	2.32274e-10	0.329186	0.587	0.321	4.21647e-06
H3F3B	2.43987e-10	0.385679	0.992	0.952	4.4291e-06
MLXIP	2.77458e-10	0.437946	0.667	0.44	5.03669e-06
IGF1	2.92732e-10	0.262864	0.119	0.022	5.31397e-06
RPL37A	3.11564e-10	0.426869	1	0.994	5.65583e-06
CTSB	3.48377e-10	0.487867	0.873	0.763	6.32408e-06
PRKCDBP	3.80329e-10	0.544842	0.571	0.347	6.90411e-06
TRO	3.84638e-10	0.48947	0.667	0.484	6.98233e-06
CST3	4.18523e-10	0.335939	0.865	0.763	7.59745e-06
GRN	5.2132e-10	0.433892	0.929	0.914	9.46353e-06
F2R	5.30295e-10	0.446821	0.54	0.31	9.62644e-06
GPM6B	5.44926e-10	0.278232	0.317	0.125	9.89204e-06
RPL41	5.70759e-10	0.266907	1	1	1.0361e-05
LRP1	5.91447e-10	0.371829	0.698	0.49	1.07365e-05
S1PR2	6.11153e-10	0.275078	0.397	0.183	1.10943e-05
LMNA	6.91113e-10	0.537681	0.738	0.584	1.25458e-05
PCDH10	6.98484e-10	0.522124	0.341	0.143	1.26796e-05
PRRX1	7.87522e-10	0.391171	0.119	0.023	1.42959e-05
FAT3	8.13878e-10	0.602976	0.524	0.298	1.47743e-05
TRAM1	8.19481e-10	0.408805	0.817	0.67	1.4876e-05
RPL17	8.51919e-10	0.525928	1	0.979	1.54649e-05
STC2	8.56285e-10	0.576282	0.397	0.191	1.55441e-05
APOE	8.64578e-10	0.697017	0.897	0.775	1.56947e-05
BMPR2	8.92201e-10	0.391291	0.881	0.807	1.61961e-05
TEAD2	9.42147e-10	0.301526	0.73	0.494	1.71028e-05
DBN1	9.47256e-10	0.345026	0.833	0.696	1.71955e-05
RPL31	9.51972e-10	0.363133	1	0.991	1.72811e-05
RPS9	9.88695e-10	0.36625	1	0.966	1.79478e-05
RPL38	1.0209e-09	0.38271	1	0.994	1.85325e-05
CCNL2	1.04673e-09	0.483939	0.897	0.778	1.90012e-05
GUCY1A3	1.25738e-09	0.802669	0.825	0.702	2.28251e-05
C1QTNF6	1.31377e-09	0.315251	0.476	0.239	2.38489e-05
IER5L	1.34529e-09	0.317928	0.524	0.292	2.4421e-05
ZNF703	1.37217e-09	0.380228	0.46	0.227	2.49091e-05
PDIA5	1.37886e-09	0.303727	0.46	0.235	2.50305e-05
GNB4	1.38118e-09	0.257756	0.659	0.412	2.50726e-05
RAB13	1.39707e-09	0.420315	0.817	0.617	2.53611e-05
NAGK	1.56234e-09	0.393277	0.81	0.625	2.83612e-05
TBC1D16	1.59302e-09	0.272335	0.508	0.281	2.89182e-05
ADAM12	1.67323e-09	0.367338	0.278	0.101	3.03742e-05
CLIP3	1.84563e-09	0.40918	0.714	0.501	3.35037e-05
CHST1	1.96928e-09	0.256247	0.341	0.142	3.57483e-05
LRIG1	2.05986e-09	0.302087	0.437	0.225	3.73926e-05
PALM	2.07508e-09	0.388133	0.754	0.529	3.76689e-05
CREB5	2.19881e-09	0.488707	0.492	0.264	3.99151e-05
CORO1C	2.38168e-09	0.386146	0.683	0.501	4.32347e-05
SEC61G	2.39634e-09	0.410054	0.921	0.854	4.35008e-05
TBCB	2.44306e-09	0.341688	0.81	0.632	4.43489e-05
ZCCHC24	2.5376e-09	0.552879	0.817	0.677	4.6065e-05
EIF3H	2.56459e-09	0.385782	0.944	0.89	4.65551e-05
INHBA	2.58163e-09	0.592718	0.333	0.146	4.68643e-05
SLC29A1	2.84579e-09	0.553308	0.619	0.407	5.16597e-05
CLTC	3.19639e-09	0.354635	0.944	0.933	5.80242e-05
COPB1	3.37045e-09	0.359647	0.857	0.789	6.11838e-05
CDKN1C	3.8843e-09	0.580183	0.881	0.753	7.05116e-05
BASP1	4.09262e-09	0.389352	0.913	0.753	7.42934e-05
AKAP12	4.39801e-09	0.594666	0.746	0.601	7.98371e-05
DDAH2	4.39801e-09	0.39946	0.778	0.598	7.98371e-05
FKBP14	4.51865e-09	0.310216	0.587	0.356	8.20271e-05
MATN2	4.52077e-09	0.47402	0.77	0.538	8.20655e-05
IL32	4.56557e-09	0.293448	0.214	0.069	8.28787e-05
MYL12B	4.61661e-09	0.437142	0.921	0.837	8.38054e-05
PPIB	4.71591e-09	0.405957	0.77	0.575	8.56079e-05
SEPT2	4.82897e-09	0.307435	0.984	0.982	8.76602e-05
HSP90AB1	4.96076e-09	0.310275	1	0.997	9.00526e-05
PSAT1	4.97233e-09	0.31078	0.373	0.18	9.02627e-05
FZD2	5.05212e-09	0.43817	0.778	0.632	9.17111e-05
MORF4L2	5.31156e-09	0.365619	0.929	0.894	9.64208e-05
DYNC1H1	5.87783e-09	0.39568	0.929	0.865	0.0001067
RPLP1	6.15749e-09	0.310916	1	0.998	0.000111777
ABCA1	6.2074e-09	0.60733	0.611	0.414	0.000112683
PIAS3	6.23614e-09	0.286635	0.556	0.325	0.000113205
SGK1	6.65697e-09	0.295864	0.389	0.185	0.000120844
CPNE2	6.84982e-09	0.287435	0.468	0.238	0.000124345
KCNA5	6.93786e-09	0.403171	0.516	0.285	0.000125943
PAPSS1	6.96332e-09	0.3882	0.714	0.516	0.000126405
ATL3	7.03291e-09	0.280566	0.405	0.203	0.000127668
C1orf122	7.15458e-09	0.358023	0.873	0.711	0.000129877
RPS5	7.89005e-09	0.312142	1	0.989	0.000143228
DGUOK	7.91921e-09	0.372314	0.722	0.54	0.000143757
FARP1	8.51662e-09	0.420585	0.817	0.702	0.000154602
DCHS1	8.52105e-09	0.282093	0.73	0.478	0.000154683
RPS11	9.57591e-09	0.340831	1	0.992	0.000173831
MCU	9.88626e-09	0.286968	0.437	0.231	0.000179465
G6PD	1.07794e-08	0.313695	0.54	0.307	0.000195679
ARID5B	1.10142e-08	0.491844	0.587	0.377	0.00019994
SELM	1.14751e-08	0.313667	0.532	0.302	0.000208307
PID1	1.17889e-08	0.310046	0.222	0.079	0.000214005
EPHB4	1.20586e-08	0.309561	0.556	0.314	0.000218901
TSKU	1.24869e-08	0.302562	0.46	0.248	0.000226675
IER3	1.29298e-08	0.595054	0.556	0.333	0.000234715
FBLN5	1.36593e-08	0.603877	0.214	0.074	0.000247957
ID3	1.47549e-08	0.757279	0.825	0.689	0.000267846
RPS25	1.51532e-08	0.314826	1	0.999	0.000275077
SPTLC1	1.59152e-08	0.304635	0.714	0.483	0.000288908
PABPC1	1.73925e-08	0.305723	0.992	0.966	0.000315727
LRRC8A	1.79381e-08	0.358319	0.556	0.369	0.00032563
SSR1	1.80776e-08	0.415296	0.833	0.709	0.000328162
RHBDF1	1.99288e-08	0.40557	0.611	0.416	0.000361767
RPL26	2.27404e-08	0.342853	1	0.996	0.000412806
NECAP2	2.39149e-08	0.254518	0.444	0.233	0.000434128
APP	2.50397e-08	0.414441	0.968	0.895	0.000454545
EEF1B2	2.57245e-08	0.339895	0.992	0.964	0.000466977
KDELR1	2.59516e-08	0.362651	0.96	0.898	0.000471099
CLIC4	2.76652e-08	0.449423	0.849	0.853	0.000502207
CACNB3	2.84722e-08	0.281141	0.556	0.344	0.000516855
SORBS3	2.93613e-08	0.335449	0.833	0.665	0.000532995
BRI3	2.96466e-08	0.360353	0.937	0.83	0.000538174
RPL35	3.18881e-08	0.348573	0.992	0.983	0.000578865
DGKA	3.39612e-08	0.297386	0.468	0.262	0.000616497
SFRP1	3.52812e-08	0.818229	0.921	0.903	0.000640459
MXD4	3.54355e-08	0.412497	0.635	0.471	0.000643261
TCF3	3.58982e-08	0.387121	0.683	0.523	0.000651661
RBM22	3.59767e-08	0.287724	0.706	0.499	0.000653086
GOLGA3	3.79479e-08	0.328735	0.667	0.501	0.000688868
APMAP	3.88061e-08	0.302205	0.714	0.498	0.000704448
PTP4A1	4.14081e-08	0.353608	0.825	0.671	0.000751681
GADD45GIP1	4.14339e-08	0.349559	0.683	0.484	0.000752149
GPR161	4.23861e-08	0.262854	0.516	0.297	0.000769434
GOSR2	4.35177e-08	0.259783	0.492	0.277	0.000789978
GUK1	4.42411e-08	0.282109	0.754	0.585	0.000803109
HP1BP3	4.50165e-08	0.312994	0.865	0.763	0.000817184
YWHAB	4.51322e-08	0.304874	0.976	0.966	0.000819285
CRABP2	4.83045e-08	0.325583	0.73	0.506	0.000876871
LIX1L	4.92768e-08	0.397199	0.579	0.378	0.000894522
PRSS23	5.05314e-08	0.57755	0.659	0.466	0.000917297
RABAC1	5.49808e-08	0.337597	0.706	0.546	0.000998067
ARHGDIA	6.17309e-08	0.41232	0.762	0.665	0.0011206
SEC62	6.2231e-08	0.335808	0.944	0.862	0.00112968
HN1	6.35659e-08	0.364161	0.73	0.537	0.00115391
BMF	6.46851e-08	0.476814	0.619	0.424	0.00117423
TMEM43	6.53814e-08	0.269349	0.508	0.299	0.00118687
GTPBP2	6.69255e-08	0.274017	0.46	0.26	0.0012149
NINJ1	7.16218e-08	0.318206	0.516	0.322	0.00130015
COPA	7.43043e-08	0.314676	0.929	0.884	0.00134885
RPL29	7.47025e-08	0.299415	0.992	0.972	0.00135607
LIMS1	7.89857e-08	0.496031	0.698	0.551	0.00143383
GPR153	8.27822e-08	0.330592	0.333	0.166	0.00150275
DYNLL1	8.69388e-08	0.33924	1	0.965	0.0015782
RPS15	8.70705e-08	0.305412	1	0.988	0.00158059
OAT	8.87824e-08	0.320928	0.571	0.371	0.00161167
RCN2	8.96331e-08	0.322752	0.802	0.662	0.00162711
RPL23A	9.06285e-08	0.313128	1	0.989	0.00164518
RPS28	9.11808e-08	0.290347	1	0.98	0.0016552
TMBIM1	9.40164e-08	0.359817	0.675	0.481	0.00170668
PACS1	9.85718e-08	0.467387	0.714	0.581	0.00178937
ID1	1.01732e-07	0.75785	0.651	0.465	0.00184675
ARCN1	1.02401e-07	0.306939	0.825	0.75	0.00185889
EIF1	1.06532e-07	0.287493	1	0.984	0.00193387
GNG12	1.11707e-07	0.430832	0.778	0.669	0.00202782
STAT6	1.12715e-07	0.384676	0.722	0.563	0.00204612
TMED3	1.14979e-07	0.278333	0.683	0.479	0.00208721
ATP6AP2	1.2297e-07	0.361541	0.873	0.75	0.00223227
TSC22D3	1.25381e-07	0.256578	0.579	0.35	0.00227603
TRIO	1.29647e-07	0.262083	0.651	0.423	0.00235347
VKORC1	1.33901e-07	0.315489	0.778	0.598	0.0024307
SEPT9	1.40235e-07	0.351004	0.794	0.66	0.00254569
MCAM	1.42599e-07	0.381785	0.341	0.172	0.0025886
PARVA	1.43308e-07	0.348693	0.754	0.589	0.00260146
KLF10	1.48279e-07	0.397144	0.381	0.204	0.0026917
GLTP	1.49165e-07	0.295274	0.579	0.369	0.0027078
YKT6	1.50561e-07	0.372845	0.762	0.651	0.00273314
FYN	1.51882e-07	0.361529	0.786	0.606	0.00275712
CNPY2	1.58242e-07	0.351836	0.77	0.595	0.00287256
CAMK2N1	1.58936e-07	0.457236	0.389	0.201	0.00288516
CSTB	1.61761e-07	0.362675	0.873	0.767	0.00293645
PTPRS	1.62163e-07	0.3189	0.698	0.512	0.00294375
CHPF2	1.70565e-07	0.254115	0.444	0.253	0.00309627
SLC30A7	1.75985e-07	0.315709	0.635	0.415	0.00319465
SRPRB	1.79199e-07	0.254145	0.5	0.307	0.00325301
DEGS1	1.80846e-07	0.29885	0.77	0.596	0.0032829
PLD3	1.83232e-07	0.313944	0.968	0.9	0.0033262
MAP1LC3A	1.86273e-07	0.467296	0.651	0.474	0.00338141
SEC61A1	1.89709e-07	0.396465	0.659	0.509	0.00344379
TYRO3	1.90826e-07	0.358808	0.492	0.31	0.00346406
CORO1B	1.93839e-07	0.252312	0.675	0.451	0.00351876
STX5	1.95975e-07	0.255896	0.579	0.374	0.00355753
SLC39A6	1.9953e-07	0.306154	0.54	0.352	0.00362207
LAMC1	2.00061e-07	0.385721	0.96	0.925	0.0036317
SMC5	2.05137e-07	0.409741	0.675	0.514	0.00372385
DNAJC10	2.06409e-07	0.348419	0.802	0.723	0.00374694
RBMS3	2.06534e-07	0.379124	0.73	0.589	0.0037492
LAMP1	2.06625e-07	0.326606	0.73	0.555	0.00375087
PTMS	2.24705e-07	0.351669	0.929	0.938	0.00407908
PLOD1	2.37852e-07	0.360914	0.762	0.632	0.00431772
PFKFB3	2.37959e-07	0.292784	0.468	0.273	0.00431967
CD200	2.42257e-07	0.273067	0.595	0.373	0.0043977
PDGFRA	2.5015e-07	0.424078	0.77	0.556	0.00454097
RPL36A	2.59413e-07	0.35426	0.873	0.753	0.00470912
CNN2	2.69385e-07	0.364318	0.897	0.884	0.00489014
SRPX	2.73963e-07	0.56411	0.595	0.426	0.00497324
EFEMP1	2.98042e-07	0.269878	0.27	0.115	0.00541036
CEP170	2.98103e-07	0.404481	0.794	0.67	0.00541147
PIP5K1C	2.99004e-07	0.374503	0.643	0.486	0.00542782
LPP	3.03236e-07	0.462938	0.913	0.865	0.00550465
IGFBP3	3.04334e-07	0.338681	0.516	0.287	0.00552458
HM13	3.14984e-07	0.326716	0.635	0.462	0.00571791
SPON1	3.25941e-07	0.381635	0.5	0.289	0.00591681
CSRP1	3.36689e-07	0.686005	0.849	0.795	0.00611191
COLGALT2	3.41174e-07	0.284392	0.413	0.229	0.00619333
CDC42	3.44191e-07	0.356129	0.929	0.939	0.0062481
PPDPF	3.49357e-07	0.308456	0.952	0.929	0.00634187
HSPA8	3.50203e-07	0.34847	1	0.984	0.00635723
TCAF1	3.54813e-07	0.588602	0.73	0.647	0.00644092
RBP1	3.55175e-07	0.3949	0.563	0.369	0.00644749
RAI14	3.71281e-07	0.529882	0.667	0.523	0.00673986
HEXA	3.84254e-07	0.260699	0.627	0.433	0.00697537
TMED9	3.98962e-07	0.39279	0.802	0.67	0.00724236
NPM1	4.03971e-07	0.294738	0.992	0.981	0.00733329
PWP1	4.10759e-07	0.293317	0.667	0.477	0.00745652
FAM65B	4.19883e-07	0.292748	0.389	0.214	0.00762213
AXL	4.5034e-07	0.327755	0.81	0.697	0.00817501
RSU1	4.68871e-07	0.409803	0.69	0.578	0.00851141
FAM89B	4.88636e-07	0.365883	0.698	0.579	0.00887021
TXN	4.90899e-07	0.348763	0.833	0.765	0.0089113
KPNB1	4.96791e-07	0.276421	0.929	0.892	0.00901826
MAP4K4	5.43136e-07	0.44898	0.833	0.797	0.00985954
MOXD1	5.9723e-07	0.540331	0.389	0.218	0.0108415
SLC26A2	6.02658e-07	0.380985	0.627	0.451	0.01094
APPL2	6.229e-07	0.364418	0.659	0.466	0.0113075
TMED2	6.33239e-07	0.282141	0.817	0.702	0.0114952
NUDT11	6.54064e-07	0.268055	0.421	0.24	0.0118732
TMEM214	6.55356e-07	0.332708	0.619	0.454	0.0118967
ATN1	6.84239e-07	0.381146	0.921	0.877	0.012421
BNIP3L	6.95936e-07	0.304516	0.921	0.819	0.0126333
TNKS1BP1	7.06164e-07	0.322383	0.683	0.466	0.012819
SSR4	7.26504e-07	0.306445	0.857	0.727	0.0131882
MYO10	7.44083e-07	0.299419	0.31	0.148	0.0135073
GPR124	7.59575e-07	0.304631	0.167	0.059	0.0137886
CAPNS1	8.25116e-07	0.315362	0.952	0.946	0.0149783
ACTR1A	8.39177e-07	0.280968	0.857	0.722	0.0152336
GLUL	8.47606e-07	0.296872	0.849	0.734	0.0153866
GUCY1B3	8.54884e-07	0.316805	0.397	0.223	0.0155187
PHLDB1	8.77832e-07	0.318053	0.706	0.524	0.0159353
GOLM1	9.40964e-07	0.388615	0.722	0.573	0.0170813
SCARF2	9.64294e-07	0.25996	0.516	0.322	0.0175048
SHKBP1	9.90353e-07	0.271765	0.54	0.342	0.0179779
TCEAL4	1.02843e-06	0.312548	0.857	0.728	0.0186691
PTMA	1.06546e-06	0.270597	1	0.986	0.0193412
POFUT2	1.11851e-06	0.251002	0.556	0.352	0.0203044
LRRC58	1.12719e-06	0.301614	0.714	0.525	0.0204618
RIC8A	1.17564e-06	0.318741	0.698	0.554	0.0213414
ADAM19	1.18726e-06	0.390171	0.611	0.437	0.0215523
EFNB2	1.20521e-06	0.553874	0.73	0.624	0.0218782
P3H4	1.20555e-06	0.399447	0.571	0.439	0.0218844
SNAP25	1.20998e-06	0.334638	0.429	0.245	0.0219648
RAP2B	1.224e-06	0.38454	0.492	0.313	0.0222193
LAMA4	1.24006e-06	0.34883	0.294	0.142	0.0225107
DPYSL2	1.30135e-06	0.328448	0.643	0.512	0.0236235
PHC2	1.3547e-06	0.305573	0.651	0.474	0.0245919
YBX3	1.35588e-06	0.359107	0.603	0.419	0.0246133
GARS	1.36096e-06	0.360171	0.698	0.579	0.0247055
LRP10	1.39002e-06	0.295658	0.746	0.586	0.025233
FBXL5	1.4383e-06	0.296301	0.794	0.666	0.0261094
PGRMC1	1.5229e-06	0.29707	0.897	0.8	0.0276452
PRKD3	1.55853e-06	0.297993	0.563	0.37	0.0282919
RAB1A	1.57301e-06	0.330151	0.929	0.873	0.0285548
RPS4X	1.60921e-06	0.281402	0.992	0.991	0.029212
FAU	1.7653e-06	0.258744	0.984	0.987	0.0320454
SHMT2	1.7759e-06	0.279628	0.492	0.324	0.0322379
WDFY1	1.79415e-06	0.26601	0.548	0.337	0.0325692
ACLY	1.84877e-06	0.328105	0.73	0.587	0.0335607
ABL1	1.94033e-06	0.297985	0.683	0.511	0.0352228
HSP90B1	1.96107e-06	0.377369	0.952	0.957	0.0355992
MYLK	1.97738e-06	0.282447	0.262	0.117	0.0358953
EFNA5	2.09302e-06	0.49056	0.794	0.608	0.0379946
DAP	2.27881e-06	0.298495	0.802	0.702	0.0413673
ST6GAL2	2.33394e-06	0.493946	0.46	0.314	0.0423679
SESTD1	2.35324e-06	0.340103	0.714	0.544	0.0427184
COL11A1	2.41747e-06	0.494076	0.413	0.242	0.0438844
RUFY3	2.61656e-06	0.317539	0.659	0.494	0.0474984
FRZB	2.63661e-06	0.307901	0.222	0.093	0.0478623
HNRNPA0	2.65372e-06	0.296354	0.937	0.846	0.0481731
LTBP1	2.69466e-06	0.548459	0.786	0.707	0.0489162
CPXM1	2.69536e-06	0.331906	0.595	0.416	0.0489288
SMARCA4	2.80853e-06	0.266039	0.889	0.774	0.0509833
IRF2BP2	2.87302e-06	0.452385	0.794	0.753	0.0521539
POSTN	2.97844e-06	0.690674	0.246	0.113	0.0540676
ARHGAP23	3.12e-06	0.257818	0.635	0.441	0.0566373
OSBPL8	3.21725e-06	0.38769	0.754	0.625	0.0584028
SCG5	3.53843e-06	0.286767	0.381	0.207	0.0642332
SCRN1	3.61118e-06	0.261761	0.873	0.767	0.0655538
KLHDC8B	3.7018e-06	0.381914	0.667	0.528	0.0671987
SPRY1	3.86544e-06	0.333777	0.246	0.115	0.0701693
PTBP3	4.05773e-06	0.26028	0.611	0.439	0.07366
GDI2	4.07684e-06	0.287443	0.881	0.84	0.0740068
ZNF275	4.09308e-06	0.266164	0.571	0.397	0.0743018
YIF1A	4.20852e-06	0.263998	0.532	0.364	0.0763972
PDIA3	4.22707e-06	0.336981	0.706	0.553	0.076734
GATA4	4.25133e-06	0.437905	0.929	0.882	0.0771743
CALM1	4.31937e-06	0.41226	0.897	0.854	0.0784096
ACTN4	4.3349e-06	0.477452	0.897	0.822	0.0786915
MYLIP	4.75506e-06	0.287208	0.619	0.436	0.0863186
TLE2	4.78633e-06	0.307453	0.532	0.354	0.0868862
AGRN	5.06354e-06	0.293228	0.77	0.584	0.0919184
GORASP2	5.24022e-06	0.27724	0.841	0.735	0.0951258
SF3B1	5.2939e-06	0.264415	0.913	0.914	0.0961001
MAGI2-AS3	5.8588e-06	0.417028	0.889	0.815	0.106355
TNS3	5.89329e-06	0.310176	0.5	0.319	0.106981
SNF8	6.00983e-06	0.257784	0.675	0.519	0.109096
RPL36A-HNRNPH2	6.06488e-06	0.318082	0.786	0.63	0.110096
TMEM132A	6.29153e-06	0.346709	0.635	0.485	0.11421
SEC16A	6.36072e-06	0.255726	0.667	0.518	0.115466
GXYLT1	6.44213e-06	0.314028	0.548	0.385	0.116944
CTXN1	6.51048e-06	0.262365	0.571	0.391	0.118185
PBX3	6.56579e-06	0.496316	0.786	0.722	0.119189
NME4	6.70694e-06	0.265107	0.984	0.951	0.121751
PYCR1	7.31028e-06	0.365237	0.5	0.348	0.132703
PMEPA1	7.35396e-06	0.487529	0.667	0.518	0.133497
SRA1	7.51851e-06	0.257435	0.54	0.367	0.136483
SESN3	7.87385e-06	0.262789	0.714	0.542	0.142934
NOVA1	8.85337e-06	0.36793	0.706	0.551	0.160715
RPS6KC1	9.16746e-06	0.302982	0.5	0.338	0.166417
SRP72	9.30604e-06	0.272269	0.857	0.77	0.168933
B2M	9.46495e-06	0.398789	0.944	0.899	0.171817
CXXC5	9.52554e-06	0.295997	0.786	0.668	0.172917
NORAD	9.88255e-06	0.396539	0.762	0.71	0.179398
DLG1	9.9122e-06	0.297851	0.667	0.546	0.179936
SPATS2L	9.99448e-06	0.431157	0.722	0.626	0.18143
TMEM165	1.04114e-05	0.33119	0.611	0.483	0.188999
CAMLG	1.11106e-05	0.358378	0.762	0.634	0.20169
EPS8	1.12591e-05	0.332494	0.532	0.367	0.204386
EXT1	1.20797e-05	0.295537	0.619	0.478	0.219282
SQSTM1	1.24739e-05	0.268233	0.81	0.74	0.226438
RAB3GAP1	1.24785e-05	0.322177	0.563	0.403	0.226522
CCND1	1.2865e-05	0.526892	0.698	0.558	0.233538
KLF3	1.31011e-05	0.282698	0.571	0.414	0.237824
RARS	1.36199e-05	0.297807	0.762	0.631	0.247241
LGR4	1.36522e-05	0.283881	0.762	0.583	0.247828
RPS26	1.40747e-05	0.280812	0.603	0.433	0.255498
PFKL	1.55647e-05	0.257484	0.627	0.452	0.282546
CTTNBP2NL	1.56891e-05	0.26206	0.571	0.405	0.284804
FNBP1L	1.58603e-05	0.340423	0.587	0.456	0.287912
THUMPD1	1.69422e-05	0.280589	0.675	0.505	0.307552
FAM171A1	1.74313e-05	0.322539	0.77	0.661	0.31643
WASF2	1.75085e-05	0.273493	0.865	0.822	0.317831
C5orf24	1.81582e-05	0.270058	0.929	0.874	0.329626
RPL18	1.89655e-05	0.266273	0.968	0.982	0.344281
WDR1	1.93902e-05	0.331409	0.857	0.815	0.35199
MLLT11	2.01572e-05	0.290311	0.889	0.805	0.365914
PDE10A	2.02421e-05	0.304039	0.46	0.297	0.367456
TCF4	2.11579e-05	0.339171	0.794	0.658	0.38408
GNG5	2.13237e-05	0.288901	0.976	0.971	0.38709
TMEM258	2.2147e-05	0.260342	0.889	0.763	0.402035
PRPF40A	2.23232e-05	0.253268	0.841	0.795	0.405234
SEC23A	2.29231e-05	0.309553	0.77	0.69	0.416124
MYO1D	2.37283e-05	0.253383	0.548	0.362	0.430739
TCEAL9	2.62721e-05	0.291656	0.746	0.623	0.476917
MYL12A	2.91376e-05	0.579302	0.881	0.865	0.528935
CXCL14	2.93616e-05	0.310073	0.198	0.091	0.533001
ACBD3	3.00302e-05	0.288503	0.683	0.546	0.545138
NPDC1	3.08608e-05	0.270622	0.563	0.412	0.560216
CFDP1	3.10365e-05	0.278063	0.738	0.608	0.563405
MAP1LC3B	3.15772e-05	0.276712	0.889	0.802	0.57322
APC	3.34525e-05	0.26421	0.587	0.438	0.607263
KLF13	3.6639e-05	0.27736	0.667	0.497	0.665107
PSMD5	3.74344e-05	0.26853	0.667	0.553	0.679547
PRRC1	4.18514e-05	0.273184	0.698	0.548	0.759729
C6orf48	4.73483e-05	0.330593	0.929	0.893	0.859513
GLT8D1	4.83935e-05	0.274007	0.563	0.399	0.878487
BTG2	4.94688e-05	0.311662	0.548	0.402	0.898006
VCP	4.9497e-05	0.271688	0.929	0.902	0.89852
TMEM109	5.12415e-05	0.271702	0.603	0.482	0.930187
MAP4K5	5.36287e-05	0.294676	0.675	0.589	0.973522
DOCK4	5.39507e-05	0.261913	0.452	0.31	0.979366
PLOD2	5.42298e-05	0.325916	0.794	0.732	0.984433
SNCA	5.5447e-05	0.287872	0.421	0.277	1
PABPC4L	6.06025e-05	0.287455	0.381	0.242	1
SYT4	6.27564e-05	0.313341	0.119	0.041	1
SRM	6.972e-05	0.327138	0.587	0.448	1
NPLOC4	6.98481e-05	0.253548	0.659	0.532	1
RPS17	7.5548e-05	0.368505	0.802	0.751	1
HBEGF	7.93536e-05	0.594642	0.317	0.178	1
KCNQ1OT1	8.08382e-05	0.45036	0.992	0.972	1
RFTN1	8.46653e-05	0.369266	0.556	0.39	1
ELL2	8.68212e-05	0.257683	0.635	0.486	1
ARMCX2	8.80912e-05	0.28252	0.81	0.708	1
PRKG1	8.82645e-05	0.262864	0.452	0.309	1
MXRA5	9.02245e-05	0.260094	0.246	0.119	1
AHCY	9.03041e-05	0.343627	0.762	0.692	1
ARL6IP1	9.11253e-05	0.266606	0.698	0.564	1
TMEM263	9.12199e-05	0.323116	0.643	0.524	1
MYO1C	9.92256e-05	0.253628	0.746	0.641	1
STX3	0.000102661	0.352228	0.492	0.372	1
LAMTOR1	0.00010285	0.262826	0.69	0.591	1
UBC	0.000107026	0.278357	0.984	0.954	1
PI4KB	0.000107512	0.25442	0.484	0.333	1
RPS14	0.000107747	0.264173	1	0.981	1
OCIAD2	0.000112161	0.296768	0.643	0.538	1
ZKSCAN1	0.000113028	0.308297	0.81	0.767	1
SMAD6	0.000114301	0.489067	0.754	0.68	1
KRTCAP2	0.000127068	0.263052	0.921	0.856	1
SRSF11	0.000130339	0.291894	0.929	0.937	1
FERMT2	0.000132997	0.42407	0.73	0.702	1
NEAT1	0.000133367	0.612221	0.849	0.824	1
HIP1	0.00013365	0.254077	0.69	0.576	1
CCL2	0.000139731	0.585157	0.103	0.035	1
RERE	0.000139957	0.285651	0.762	0.661	1
P4HA1	0.000140166	0.25278	0.571	0.431	1
CD151	0.000142053	0.255775	0.849	0.794	1
CSRNP2	0.000173553	0.279734	0.595	0.461	1
PSMD1	0.000176558	0.278146	0.841	0.785	1
TP53I11	0.000190323	0.314981	0.619	0.5	1
RUNX1T1	0.000254185	0.323217	0.897	0.825	1
DSG2	0.000258156	0.280178	0.746	0.685	1
SLC16A12	0.000267709	0.273253	0.476	0.346	1
PTRF	0.000274375	0.343135	0.54	0.406	1
GADD45B	0.00028721	0.254559	0.405	0.274	1
SF3B4	0.000289572	0.273335	0.833	0.774	1
HTRA1	0.000290973	0.285835	0.794	0.67	1
FSTL3	0.000292096	0.265741	0.381	0.255	1
CUX1	0.000305924	0.295683	0.913	0.909	1
COL27A1	0.000313012	0.295889	0.46	0.321	1
ARHGAP1	0.000335608	0.255839	0.802	0.777	1
ERBB3	0.000339389	0.525542	0.27	0.157	1
ST5	0.000383987	0.280342	0.468	0.339	1
FAM210B	0.000387879	0.295414	0.794	0.676	1
SAR1A	0.000394593	0.269014	0.714	0.664	1
C1orf198	0.00046489	0.627687	0.77	0.741	1
ILK	0.000489057	0.265579	0.81	0.798	1
CNN1	0.000491716	0.646609	0.619	0.563	1
HDGFRP3	0.000494037	0.262514	0.73	0.627	1
ARHGEF2	0.000501501	0.272832	0.635	0.522	1
ZFC3H1	0.000511556	0.264718	0.571	0.487	1
RCAN1	0.00051722	0.384992	0.413	0.293	1
ACTL6A	0.000537506	0.251764	0.484	0.374	1
UBLCP1	0.000556414	0.281979	0.603	0.492	1
DCLK2	0.000615254	0.30427	0.5	0.379	1
GSTA4	0.000621542	0.259599	0.81	0.727	1
PCGF3	0.00063111	0.250298	0.627	0.539	1
ADAMTS1	0.000662404	0.330221	0.452	0.323	1
NLN	0.000667378	0.29623	0.595	0.464	1
CBLN2	0.000689763	0.740329	0.167	0.082	1
IER2	0.000816465	0.326299	0.69	0.567	1
MTCH1	0.000836415	0.25144	0.833	0.815	1
GALNT2	0.000880399	0.330455	0.675	0.601	1
CD74	0.000985693	0.259561	0.365	0.239	1
FLJ44635	0.00101914	0.268246	0.754	0.629	1
CADM1	0.00102904	0.260489	0.81	0.706	1
SHISA2	0.00109656	0.459233	0.5	0.395	1
SPRY2	0.00126141	0.271812	0.437	0.31	1
ZFAS1	0.00129675	0.337137	0.762	0.668	1
CCDC88A	0.00150767	0.305698	0.794	0.727	1
NCAM1	0.00153761	0.390134	0.873	0.784	1
ILF2	0.00155372	0.280817	0.778	0.735	1
NKD1	0.00164635	0.262943	0.111	0.049	1
RACK1	0.00166611	0.252654	0.802	0.775	1
H2AFZ	0.00168152	0.304955	0.905	0.824	1
ZNF503	0.00171026	0.322207	0.698	0.575	1
FAM110B	0.00178666	0.372889	0.5	0.39	1
IP6K2	0.00202818	0.257442	0.722	0.635	1
LGMN	0.00223212	0.273196	0.698	0.66	1
ZNF281	0.00225969	0.263232	0.643	0.56	1
LIMS2	0.00239144	0.339738	0.484	0.407	1
ZNF385A	0.00279592	0.299173	0.421	0.334	1
EIF4EBP1	0.00281081	0.269406	0.635	0.52	1
DYNLT1	0.0028264	0.267092	0.881	0.835	1
RPS27L	0.0032817	0.29268	0.762	0.695	1
FZD1	0.00343808	0.309575	0.587	0.499	1
TANC1	0.00371648	0.256819	0.579	0.491	1
CLU	0.00426374	0.317566	0.389	0.282	1
NUAK1	0.00428216	0.310383	0.429	0.327	1
CTGF	0.00464057	1.48794	0.516	0.444	1
C12orf57	0.00593054	0.272589	0.802	0.76	1
PPHLN1	0.00618364	0.252513	0.619	0.549	1
WWTR1	0.00631138	0.266233	0.571	0.501	1
GATM	0.00715457	0.646324	0.532	0.502	1
S1PR3	0.00812714	0.292268	0.429	0.335	1
LHFP	0.00856168	0.263714	0.69	0.651	1
ANOS1	0.0102054	0.342674	0.341	0.262	1
PIKFYVE	0.0104944	0.251927	0.579	0.497	1
IDH1	0.0131453	0.402791	0.762	0.703	1
CALR	0.01338	0.268784	0.873	0.86	1
MYOF	0.0153145	0.25591	0.516	0.437	1
FAM46A	0.0155332	0.314387	0.484	0.407	1
PMEL	0.0169973	0.250825	0.198	0.131	1
ETV1	0.0285252	0.407662	0.619	0.559	1
RGS5	0.0298183	0.482653	0.683	0.636	1
EDN1	0.0307687	0.26286	0.175	0.115	1
TGFB2	0.0307756	0.2938	0.579	0.502	1
LRRN3	0.0382732	0.260043	0.246	0.178	1
JUNB	0.0394226	0.255243	0.484	0.413	1
CYR61	0.0680629	0.434412	0.508	0.481	1
ZMAT3	0.0845534	0.266166	0.611	0.596	1
SC5D	0.101363	0.280514	0.556	0.509	1
CRIM1	0.114917	0.424115	0.492	0.449	1
VEGFA	0.17978	0.408588	0.69	0.681	1
DHRS9	0.204609	0.363974	0.333	0.285	1
ACTA1	0.217643	0.777779	0.206	0.166	1
ANKRD1	0.311939	0.260843	0.214	0.266	1
WBP5	0.359807	0.297563	0.183	0.169	1
EGR1	0.496319	0.307657	0.365	0.349	1
RPS18	0.604795	0.442606	0.683	0.651	1
FAM115A	0.788803	0.295222	0.183	0.186	1
PRSS35	0.856745	0.306028	0.476	0.516	1
H19	0.880332	1.01782	0.365	0.357	1
GNB2L1	0.964775	0.279607	0.198	0.221	1

## Sheet: cluster7
	p_val	avg_log2FC	pct.1	pct.2	p_val_adj
GABRP	1.51596e-199	5.1608	0.942	0.133	2.75192e-195		as shown in Figure 7 - figure supplement 1
EPAS1	2.14887e-178	4.05178	0.969	0.201	3.90084e-174
TGFBI	1.13436e-189	3.95319	0.924	0.133	2.05921e-185
HAND1	1.66235e-161	3.90955	0.929	0.203	3.01766e-157
LUM	1.76692e-193	3.78809	0.938	0.132	3.2075e-189
IGFBP7	1.21283e-109	3.09608	0.96	0.544	2.20166e-105
COL12A1	1.14713e-244	3.05822	0.893	0.052	2.08238e-240
FBLN1	7.09467e-132	3.052	0.96	0.353	1.2879e-127
VTCN1	5.29842e-249	2.91698	0.92	0.059	9.61822e-245
S100A11	6.50523e-125	2.82872	0.996	0.547	1.1809e-120
ANXA1	7.80143e-159	2.78744	0.96	0.217	1.41619e-154
COL3A1	2.7719e-92	2.5693	0.982	0.757	5.03183e-88
EPCAM	1.31957e-168	2.52612	0.902	0.162	2.39541e-164
ARHGAP29	2.32939e-171	2.52087	0.929	0.177	4.22854e-167
PTN	2.38403e-67	2.5056	0.897	0.674	4.32773e-63
C8orf4	7.44703e-259	2.50059	0.911	0.045	1.35186e-254
FN1	1.20728e-89	2.38737	0.973	0.668	2.19157e-85
TFAP2A	1.06995e-263	2.37631	0.884	0.034	1.94227e-259
NPY	7.63505e-96	2.36513	0.67	0.116	1.38599e-91
UBL3	1.98165e-109	2.36444	0.942	0.483	3.59728e-105
ITGB6	1.17593e-275	2.32938	0.853	0.019	2.13466e-271
THBS1	9.21979e-100	2.31884	0.866	0.281	1.67367e-95
ADAMTS18	5.35269e-244	2.296	0.853	0.039	9.71674e-240
FOS	5.3019e-129	2.28689	0.884	0.214	9.62455e-125
KRT19	2.53982e-116	2.28472	0.942	0.349	4.61053e-112
COL5A1	2.76757e-106	2.27757	0.973	0.534	5.02398e-102
CCNG2	3.8844e-119	2.27705	0.893	0.284	7.05135e-115
NDNF	2.81044e-221	2.2453	0.857	0.059	5.10178e-217
SLC35F2	3.50542e-181	2.18539	0.911	0.136	6.36339e-177
GPC3	7.69194e-94	2.17681	0.929	0.447	1.39632e-89
TMSB4X	3.73661e-96	2.11524	1	0.724	6.78307e-92
SLC2A1	4.99491e-93	2.11502	0.915	0.453	9.06727e-89
AMOT	9.63139e-136	2.11374	0.871	0.207	1.74839e-131
SFRP2	1.1832e-95	2.08783	0.656	0.113	2.14786e-91
PDLIM1	5.04901e-101	2.0686	0.973	0.753	9.16547e-97
CLDN6	6.19433e-103	2.06309	0.924	0.477	1.12446e-98
SPINT2	1.91127e-110	2.04771	1	0.95	3.46954e-106
PHLDB2	3.06286e-97	2.02831	0.893	0.379	5.56001e-93
ALCAM	3.12087e-75	2.02043	0.781	0.311	5.66532e-71
SLC2A3	6.02026e-77	2.00861	0.911	0.543	1.09286e-72
CD9	2.09625e-178	1.99554	0.866	0.109	3.80533e-174
CCDC80	3.53916e-56	1.99174	0.924	0.681	6.42464e-52
THRB	1.18388e-252	1.98346	0.839	0.029	2.1491e-248
NPNT	4.67863e-97	1.97842	0.705	0.149	8.49312e-93
RDH10	2.61409e-63	1.93995	0.871	0.448	4.74537e-59
TSPAN13	4.55931e-92	1.91321	0.955	0.623	8.27651e-88
IGDCC3	3.10856e-96	1.88569	0.893	0.429	5.64297e-92
CRABP2	4.26715e-81	1.88275	0.911	0.464	7.74616e-77
KCNMA1	1.05523e-161	1.85078	0.839	0.114	1.91556e-157
SPP1	2.69895e-123	1.80842	0.464	0.019	4.89941e-119
FAM84B	9.42396e-80	1.79621	0.951	0.571	1.71073e-75
PRSS23	1.24457e-72	1.75725	0.862	0.423	2.25927e-68
CMIP	2.16965e-104	1.73014	0.973	0.532	3.93856e-100
SGK223	2.32883e-187	1.72551	0.848	0.085	4.22752e-183
PFN2	1.75792e-97	1.70809	0.991	0.92	3.19115e-93
MANBA	1.13508e-68	1.67915	0.862	0.543	2.06051e-64
MAN2A1	3.75257e-84	1.63582	0.875	0.378	6.81204e-80
GATA3	1.26464e-151	1.63568	0.871	0.154	2.29569e-147
ACTG1	1.29233e-80	1.61989	1	0.983	2.34596e-76
CTHRC1	2.87118e-107	1.6014	0.799	0.179	5.21204e-103
SPARC	6.05137e-75	1.60099	1	0.908	1.09851e-70
SPINT1	1.66146e-213	1.59677	0.844	0.059	3.01604e-209
HMGA2	7.43443e-74	1.59198	0.951	0.742	1.34957e-69
CASP10	2.82201e-83	1.58351	0.585	0.11	5.12279e-79
TJP2	2.84826e-95	1.58278	0.897	0.409	5.17045e-91
CST3	1.24574e-62	1.57594	0.938	0.745	2.26139e-58
LAMB1	1.4981e-94	1.57321	0.96	0.44	2.71951e-90
LAPTM4A	1.40191e-81	1.56496	0.969	0.871	2.54489e-77
TACC1	1.71083e-85	1.5557	0.893	0.457	3.10568e-81
ANXA2	7.99702e-92	1.54528	1	0.923	1.4517e-87
CPZ	1.66188e-174	1.53573	0.817	0.089	3.01681e-170
ANKS1A	2.43941e-57	1.52886	0.799	0.404	4.42827e-53
KRT17	8.43132e-99	1.5219	0.46	0.035	1.53054e-94
AHNAK	5.10033e-80	1.52079	0.973	0.72	9.25863e-76
ANXA3	2.01063e-87	1.51824	0.879	0.385	3.64991e-83
CDH3	3.65608e-96	1.51481	0.884	0.358	6.63687e-92
SEPT8	5.97369e-98	1.49836	0.902	0.427	1.0844e-93
HPGD	1.32237e-155	1.4897	0.585	0.026	2.40049e-151
FAM107B	1.52223e-93	1.47799	0.804	0.239	2.7633e-89
KANK4	3.16149e-121	1.47641	0.804	0.147	5.73905e-117
SLC38A1	2.35481e-75	1.4703	0.946	0.775	4.27469e-71
MPZL1	2.99004e-85	1.46604	0.915	0.512	5.42783e-81
LGALS3	7.48039e-91	1.45624	0.857	0.314	1.35791e-86
COL1A1	1.77037e-63	1.45159	0.991	0.895	3.21374e-59
COL5A2	1.0231e-76	1.43725	0.946	0.618	1.85723e-72
ERRFI1	3.94618e-112	1.43132	0.786	0.173	7.1635e-108
CDH1	1.69891e-215	1.42664	0.812	0.045	3.08402e-211
MXRA5	1.12434e-148	1.4214	0.656	0.049	2.04102e-144
SUCO	2.01952e-67	1.41379	0.915	0.692	3.66603e-63
CAPN6	5.94586e-139	1.40471	0.692	0.073	1.07935e-134
IGFBP3	7.98566e-82	1.40309	0.835	0.225	1.44964e-77
UBASH3B	1.28579e-220	1.36212	0.768	0.029	2.33409e-216
AMOTL2	5.8242e-49	1.36073	0.871	0.549	1.05727e-44
RND3	2.60095e-93	1.35816	0.768	0.189	4.7215e-89
UBE2J1	5.18967e-75	1.3445	0.897	0.475	9.42081e-71
MYO6	2.12749e-67	1.34126	0.911	0.561	3.86203e-63
GNAS	1.12987e-92	1.33917	1	1	2.05105e-88
LY6E	3.2292e-76	1.32985	0.897	0.515	5.86197e-72
ADAMTS6	4.17225e-73	1.32216	0.772	0.305	7.57389e-69
PRTG	3.78101e-44	1.3209	0.835	0.567	6.86367e-40
LIMA1	7.60545e-88	1.31952	0.826	0.265	1.38062e-83
PTK7	1.1477e-88	1.31688	0.826	0.295	2.08342e-84
PCDH9	4.5593e-54	1.31504	0.723	0.291	8.2765e-50
ADAMTS9	4.73901e-70	1.3092	0.754	0.267	8.60273e-66
RAB25	5.19021e-227	1.30576	0.768	0.026	9.42179e-223
FAM198B	1.40404e-91	1.3005	0.821	0.266	2.54876e-87
CADM1	2.67396e-53	1.29626	0.92	0.683	4.85404e-49
CYR61	2.90706e-46	1.28882	0.804	0.435	5.27719e-42
CSRP1	1.75369e-67	1.28031	0.969	0.773	3.18347e-63
CLDN4	3.83589e-235	1.27802	0.754	0.018	6.96329e-231
LINC01279	1.01872e-60	1.2581	0.674	0.199	1.84928e-56
SESN3	5.34062e-61	1.25675	0.866	0.508	9.69483e-57
SLITRK6	6.25753e-153	1.25282	0.612	0.033	1.13593e-148
LOXL2	6.61747e-82	1.24958	0.826	0.3	1.20127e-77
KIAA1217	2.04344e-101	1.2475	0.804	0.225	3.70947e-97
IQGAP1	6.00735e-76	1.24659	0.915	0.431	1.09052e-71
SDCBP	3.42939e-61	1.22715	0.924	0.719	6.22537e-57
CAPN2	5.98479e-71	1.21752	0.982	0.872	1.08642e-66
HAPLN1	8.17876e-48	1.21568	0.504	0.123	1.48469e-43
MDK	9.75203e-75	1.20292	1	0.997	1.77029e-70
FRMD6	1.51964e-51	1.18833	0.585	0.191	2.7586e-47
KRT8	2.15793e-57	1.18794	0.982	0.913	3.91729e-53
ACTB	1.31994e-61	1.18603	1	0.973	2.39609e-57
XAGE2	8.87655e-188	1.18113	0.594	0.01	1.61136e-183
MYH9	4.78825e-66	1.17663	0.978	0.785	8.69211e-62
SLC44A2	3.83134e-68	1.17261	0.933	0.751	6.95504e-64
SCG2	1.32906e-26	1.1717	0.223	0.04	2.41265e-22
TAGLN2	1.46754e-91	1.16607	0.772	0.195	2.66403e-87
LASP1	2.12523e-75	1.16265	0.906	0.471	3.85793e-71
LGI1	1.79118e-197	1.15535	0.656	0.017	3.25153e-193
PDLIM2	1.29913e-75	1.15385	0.763	0.276	2.35832e-71
ANXA5	1.68754e-62	1.14922	0.982	0.844	3.06339e-58
IGFBPL1	1.1316e-146	1.14178	0.567	0.028	2.0542e-142
SSFA2	1.39494e-52	1.13694	0.799	0.438	2.53223e-48
ANK3	1.35692e-48	1.13294	0.915	0.75	2.46321e-44
MMP2	3.02694e-56	1.12804	0.772	0.305	5.49481e-52
SLC5A6	3.71937e-84	1.11812	0.799	0.263	6.75178e-80
F11R	1.71622e-97	1.11407	0.79	0.214	3.11546e-93
FLNB	8.53893e-63	1.10928	0.804	0.368	1.55007e-58
DSC2	5.17672e-60	1.10804	0.853	0.474	9.39729e-56
EGR1	2.12781e-51	1.09684	0.75	0.29	3.86261e-47
PTPRF	1.9015e-60	1.09534	0.92	0.693	3.4518e-56
BCAT1	1.03057e-51	1.09415	0.888	0.539	1.8708e-47
DNAJC1	1.07331e-67	1.08608	0.862	0.425	1.94837e-63
IVNS1ABP	2.0663e-43	1.0852	0.906	0.69	3.75096e-39
PKD2	5.73455e-56	1.07484	0.884	0.589	1.04099e-51
UGCG	1.33629e-66	1.07317	0.781	0.31	2.42577e-62
MET	5.31792e-193	1.07021	0.688	0.027	9.65361e-189
S100A6	7.14526e-45	1.06951	0.746	0.387	1.29708e-40
CTSB	3.17415e-64	1.06622	0.96	0.743	5.76203e-60
KDELC2	5.99619e-84	1.06382	0.781	0.245	1.08849e-79
CAST	3.3821e-61	1.0625	0.92	0.682	6.13952e-57
LPCAT1	2.05423e-90	1.06215	0.808	0.248	3.72904e-86
GNAQ	3.7868e-57	1.05527	0.879	0.543	6.87417e-53
PCSK1N	2.53979e-79	1.05213	0.625	0.135	4.61047e-75
MYL12B	2.56232e-73	1.04654	0.996	0.82	4.65138e-69
CALM1	2.18306e-47	1.04457	0.969	0.841	3.96291e-43
ELMOD1	2.11212e-120	1.04251	0.594	0.057	3.83412e-116
GLB1	4.58674e-50	1.04	0.839	0.547	8.32631e-46
SLC5A3	2.2644e-42	1.03557	0.777	0.441	4.11056e-38
NOG	5.89415e-88	1.03285	0.54	0.076	1.06997e-83
CLDN7	4.58905e-180	1.02629	0.603	0.016	8.33049e-176
SLC7A1	2.30079e-70	1.02347	0.732	0.24	4.17662e-66
MEST	1.80625e-65	1.02248	0.835	0.354	3.27888e-61
FAM89A	1.07248e-113	1.01756	0.737	0.123	1.94687e-109
ARID3A	2.36486e-60	1.01258	0.871	0.505	4.29293e-56
TBC1D1	2.62852e-57	1.00869	0.862	0.481	4.77155e-53
TPM4	3.71788e-54	1.00134	0.973	0.863	6.74907e-50
ARHGDIB	3.16193e-132	1.00127	0.67	0.065	5.73985e-128
CXXC5	2.06442e-50	1.00091	0.915	0.641	3.74755e-46
H3F3B	1.70733e-61	1.00016	1	0.949	3.09932e-57
GAS1	5.80034e-59	0.994604	0.661	0.205	1.05293e-54
SULF1	4.34489e-64	0.987933	0.746	0.219	7.88727e-60
RPS27	5.89209e-66	0.987019	1	0.997	1.06959e-61
CERCAM	2.28603e-60	0.986695	0.848	0.44	4.14982e-56
TMEM2	3.54626e-60	0.981505	0.808	0.37	6.43753e-56
FUT8	1.56343e-84	0.980746	0.737	0.193	2.83809e-80
TAC3	1.18634e-122	0.980661	0.679	0.083	2.15355e-118
AP1M2	1.16231e-169	0.978246	0.688	0.043	2.10994e-165
FAM60A	1.10014e-56	0.977909	0.924	0.695	1.99708e-52
GUCY1A3	7.73707e-28	0.975244	0.821	0.694	1.40451e-23
TUBA1C	5.14926e-52	0.974482	0.768	0.351	9.34746e-48
TFAP2B	1.76026e-165	0.974001	0.545	0.012	3.19541e-161
TMEM123	5.51529e-51	0.966726	0.915	0.705	1.00119e-46
JUN	4.67773e-46	0.965583	0.808	0.376	8.49147e-42
CDH10	2.24345e-72	0.962364	0.527	0.094	4.07253e-68
IGFBP2	2.48456e-55	0.961722	0.929	0.553	4.51022e-51
SCUBE3	8.33121e-68	0.95905	0.629	0.157	1.51236e-63
L1TD1	2.83075e-101	0.957385	0.571	0.068	5.13866e-97
ERBB3	8.00902e-129	0.956942	0.705	0.085	1.45388e-124
TUBB	3.99468e-52	0.955305	1	0.981	7.25154e-48
EEF1A1	1.8037e-94	0.954274	1	1	3.27425e-90
NDST3	3.38212e-176	0.953822	0.612	0.019	6.13957e-172
SPATS2L	8.37207e-52	0.953314	0.906	0.593	1.51978e-47
PTPN14	7.05207e-44	0.950707	0.839	0.545	1.28016e-39
EMP2	1.13667e-40	0.941497	0.915	0.731	2.0634e-36
SPG20	5.76063e-53	0.939442	0.862	0.51	1.04573e-48
MTMR11	3.6787e-110	0.938678	0.692	0.109	6.67794e-106
PKP3	1.47874e-198	0.932549	0.643	0.013	2.68436e-194
CRTAP	2.41196e-48	0.930153	0.955	0.855	4.37843e-44
PABPC1	2.81632e-70	0.9286	0.991	0.965	5.11246e-66
SLC3A2	8.51211e-49	0.926791	0.862	0.543	1.5452e-44
TLE4	1.44205e-70	0.924552	0.75	0.249	2.61776e-66
S100A10	2.75413e-58	0.91962	0.964	0.501	4.99957e-54
CFL1	4.3055e-73	0.91572	1	0.998	7.81577e-69
SORT1	1.33603e-46	0.913119	0.893	0.683	2.42529e-42
TMEM30A	2.79999e-53	0.911196	0.92	0.67	5.08282e-49
FBXO2	7.901e-119	0.905578	0.652	0.083	1.43427e-114
TKT	1.60423e-59	0.903903	0.817	0.362	2.91216e-55
EHBP1	1.40898e-35	0.89919	0.768	0.49	2.55772e-31
CRIM1	1.50374e-45	0.898029	0.817	0.397	2.72975e-41
RPS6	8.74176e-67	0.89221	1	0.999	1.58689e-62
ZC3H12C	6.03309e-66	0.891968	0.714	0.234	1.09519e-61
MID1	4.59582e-44	0.890848	0.888	0.625	8.34279e-40
SPOPL	6.08375e-55	0.88903	0.714	0.283	1.10438e-50
CDV3	2.63011e-48	0.88658	0.92	0.784	4.77443e-44
PTBP1	7.61148e-49	0.8856	0.902	0.643	1.38171e-44
RNA28S5	9.52024e-65	0.878767	0.643	0.146	1.72821e-60
TES	4.50786e-47	0.877507	0.853	0.477	8.18311e-43
OBSL1	6.68994e-40	0.876922	0.942	0.867	1.21443e-35
MMP9	6.99069e-72	0.875966	0.268	0.009	1.26902e-67
CLMN	2.36598e-90	0.87578	0.656	0.118	4.29496e-86
TCEAL9	4.53275e-41	0.875733	0.897	0.593	8.22831e-37
LPCAT2	5.86931e-93	0.874462	0.683	0.134	1.06546e-88
VGLL1	9.0575e-179	0.871235	0.607	0.017	1.64421e-174
ANO6	8.84978e-53	0.870941	0.808	0.421	1.6065e-48
PRRG4	6.23258e-142	0.864886	0.598	0.039	1.1314e-137
KLF6	5.13543e-34	0.864846	0.839	0.517	9.32235e-30
SH3YL1	1.16328e-69	0.864407	0.763	0.261	2.11171e-65
GGH	7.49554e-48	0.862733	0.683	0.257	1.36067e-43
HMGA1	5.93134e-47	0.862383	0.929	0.732	1.07672e-42
LRRN1	1.55855e-95	0.861531	0.647	0.101	2.82923e-91
TLE1	5.5924e-83	0.858867	0.71	0.169	1.01519e-78
CAV1	5.00455e-26	0.858708	0.67	0.345	9.08475e-22
F3	3.82448e-97	0.856035	0.567	0.073	6.94258e-93
PFN1	8.44028e-55	0.855712	1	0.991	1.53216e-50
TMTC2	4.49653e-76	0.852664	0.661	0.159	8.16255e-72
FOSB	5.07051e-121	0.852662	0.455	0.018	9.2045e-117
PDGFC	1.34921e-55	0.85089	0.692	0.244	2.44921e-51
ARL4C	1.81613e-38	0.844573	0.705	0.328	3.29682e-34
OPTN	4.254e-46	0.843233	0.795	0.449	7.72229e-42
ARF6	1.37499e-50	0.839843	0.83	0.463	2.49601e-46
PDE4D	4.08007e-57	0.839268	0.714	0.259	7.40655e-53
IL1R1	3.75338e-108	0.838202	0.536	0.05	6.81352e-104
SLC27A6	7.62444e-99	0.837627	0.656	0.104	1.38407e-94
ACTN4	2.45137e-45	0.836906	0.951	0.809	4.44998e-41
MME	1.04475e-124	0.835078	0.589	0.047	1.89654e-120
IER2	4.89502e-37	0.833936	0.826	0.539	8.88594e-33
TPT1	1.79768e-75	0.832596	1	0.999	3.26333e-71
SNX2	1.45859e-39	0.832177	0.871	0.591	2.64778e-35
OLFML3	9.44285e-33	0.830914	0.799	0.462	1.71416e-28
ADGRG1	2.31685e-139	0.830552	0.54	0.025	4.20577e-135
NTRK2	8.24037e-28	0.82771	0.402	0.129	1.49587e-23
RAB31	5.45338e-42	0.824335	0.888	0.619	9.89952e-38
MXRA8	2.54077e-43	0.818766	0.821	0.439	4.61226e-39
GPRC5A	1.25683e-139	0.818358	0.554	0.028	2.28152e-135
IER3	1.06841e-19	0.815257	0.562	0.317	1.93949e-15
PDGFB	4.36145e-90	0.811812	0.491	0.051	7.91735e-86
NPC2	4.83165e-45	0.808469	0.933	0.809	8.77089e-41
SLC23A2	3.48657e-63	0.808366	0.674	0.211	6.32917e-59
PRSS8	1.26358e-117	0.808177	0.629	0.071	2.29378e-113
RHOU	4.54571e-37	0.806648	0.594	0.231	8.25182e-33
SERF2	4.29923e-64	0.806633	1	0.987	7.80439e-60
FSTL1	4.21409e-43	0.806599	0.987	0.961	7.64984e-39
RBM3	1.6433e-40	0.803484	0.924	0.684	2.98309e-36
MYO5B	3.24272e-160	0.80236	0.656	0.04	5.88652e-156
RPS20	2.30741e-61	0.802266	1	0.998	4.18865e-57
EDNRB	1.747e-81	0.802167	0.616	0.118	3.17133e-77
C1GALT1	5.05833e-44	0.800957	0.781	0.429	9.18238e-40
TIMP2	1.2829e-41	0.799468	0.857	0.525	2.32885e-37
TNS3	1.54954e-55	0.799388	0.723	0.273	2.81288e-51
SLC25A1	1.36153e-37	0.798867	0.853	0.645	2.47159e-33
MAN1A1	8.80303e-36	0.796722	0.692	0.34	1.59801e-31
UXS1	8.20517e-55	0.796587	0.665	0.234	1.48948e-50
SLC1A5	4.58649e-53	0.796496	0.719	0.299	8.32585e-49
RPS12	2.24407e-60	0.796031	1	0.997	4.07366e-56
NEAT1	5.93074e-20	0.794579	0.92	0.812	1.07661e-15
KLK6	3.12016e-101	0.794145	0.545	0.057	5.66403e-97
BCL11A	1.53639e-33	0.793835	0.746	0.433	2.78902e-29
RGS16	7.8297e-61	0.793052	0.317	0.029	1.42132e-56
FAM114A1	2.2783e-48	0.792926	0.812	0.409	4.1358e-44
NR2F2	1.88991e-34	0.791876	0.973	0.845	3.43076e-30
HES1	2.28633e-13	0.791497	0.536	0.337	4.15038e-09
TPM3	1.83389e-38	0.791184	0.871	0.617	3.32906e-34
CRISPLD2	8.34313e-91	0.790347	0.451	0.039	1.51453e-86
SPIN4	3.25141e-43	0.789836	0.679	0.27	5.90229e-39
VAMP8	1.29583e-119	0.789364	0.665	0.083	2.35232e-115
HEBP1	6.48813e-43	0.787841	0.781	0.444	1.17779e-38
S100A16	7.04728e-21	0.787332	0.634	0.403	1.27929e-16
EPB41L3	3.08881e-32	0.786346	0.888	0.735	5.60712e-28
KRT18	9.60898e-38	0.784607	0.911	0.684	1.74432e-33
FEZ2	1.81481e-44	0.7844	0.862	0.547	3.29443e-40
H2AFZ	1.25096e-31	0.782487	0.951	0.811	2.27086e-27
LEPROT	1.47688e-37	0.779972	0.929	0.809	2.68098e-33
SECISBP2L	2.22681e-32	0.778558	0.804	0.541	4.04233e-28
SEMA5A	1.28626e-23	0.775801	0.844	0.711	2.33495e-19
HNMT	3.49342e-43	0.775521	0.612	0.208	6.34161e-39
SLC1A1	2.16571e-78	0.774923	0.487	0.065	3.93141e-74
SDC4	3.94708e-41	0.774054	0.714	0.358	7.16513e-37
APOE	2.41337e-33	0.773668	0.929	0.762	4.38099e-29
VGLL3	1.78193e-131	0.77316	0.545	0.032	3.23474e-127
PLXDC2	7.49023e-36	0.772257	0.634	0.279	1.3597e-31
B4GALT1	2.72982e-58	0.772146	0.808	0.381	4.95545e-54
GRHL2	1.70243e-173	0.771802	0.54	0.007	3.09042e-169
MAML2	2.76201e-54	0.769783	0.616	0.191	5.01387e-50
VWA1	3.11865e-91	0.768707	0.625	0.103	5.66129e-87
EPSTI1	1.46616e-32	0.76649	0.616	0.285	2.66152e-28
FAM83B	1.3368e-110	0.7651	0.554	0.052	2.42669e-106
LMNA	4.67871e-35	0.762101	0.826	0.561	8.49325e-31
STS	2.63947e-74	0.761886	0.442	0.055	4.79143e-70
ARHGDIA	1.16912e-43	0.758871	0.897	0.638	2.12231e-39
SFN	9.96959e-114	0.756667	0.42	0.015	1.80978e-109
ZFAS1	5.54882e-36	0.752585	0.933	0.637	1.00728e-31
YWHAZ	1.79343e-59	0.75172	0.996	0.989	3.25562e-55
LRRC75A-AS1	2.43447e-40	0.751448	0.951	0.717	4.41929e-36
SH3BGRL3	8.70454e-40	0.750741	0.915	0.641	1.58014e-35
JUND	8.9935e-38	0.7503	0.951	0.785	1.63259e-33
CXCL12	3.83904e-22	0.749825	0.759	0.486	6.96901e-18
GSTP1	1.6822e-37	0.749634	0.978	0.9	3.0537e-33
MCHR1	5.46742e-107	0.749464	0.384	0.012	9.92501e-103
SLC7A5	7.46734e-91	0.749042	0.567	0.078	1.35555e-86
MYADM	5.52445e-33	0.747256	0.951	0.79	1.00285e-28
APLP2	1.45057e-45	0.746938	0.978	0.973	2.63321e-41
PAWR	1.45762e-40	0.746616	0.647	0.297	2.64602e-36
CGN	8.59803e-113	0.746321	0.589	0.061	1.5608e-108
C5orf30	1.24795e-41	0.746111	0.696	0.303	2.2654e-37
HLA-E	5.68414e-50	0.745403	0.629	0.206	1.03184e-45
JUP	3.13882e-39	0.744185	0.951	0.872	5.6979e-35
MBP	3.73145e-128	0.743187	0.58	0.043	6.7737e-124
KCNJ2	4.89826e-145	0.742647	0.527	0.019	8.89181e-141
SHTN1	3.79954e-67	0.742365	0.656	0.179	6.8973e-63
GALNT6	3.69339e-126	0.739445	0.594	0.049	6.70461e-122
BEND7	7.46154e-47	0.736621	0.688	0.286	1.35449e-42
SCD5	4.57025e-46	0.733521	0.487	0.127	8.29638e-42
PTMA	1.14635e-46	0.730627	1	0.985	2.08097e-42
PLSCR5	2.27275e-128	0.729362	0.562	0.037	4.12573e-124
TMED3	6.58349e-38	0.728808	0.772	0.453	1.1951e-33
TGFBR1	1.73227e-33	0.72762	0.848	0.527	3.14458e-29
AMOTL1	2.02343e-39	0.727059	0.795	0.481	3.67314e-35
ARHGAP28	6.53592e-43	0.726952	0.665	0.261	1.18647e-38
TRIP10	1.93424e-33	0.726672	0.821	0.565	3.51123e-29
PTBP3	9.41618e-47	0.726266	0.781	0.403	1.70932e-42
CAPNS1	9.96595e-47	0.723877	0.973	0.943	1.80912e-42
SLCO2A1	7.7792e-127	0.72361	0.522	0.03	1.41216e-122
SPNS2	3.39511e-127	0.723575	0.451	0.013	6.16314e-123
STOM	1.62195e-20	0.722804	0.598	0.346	2.94433e-16
HDLBP	1.4373e-43	0.722616	0.964	0.93	2.60914e-39
ARSJ	3.36638e-46	0.721807	0.487	0.115	6.111e-42
FILIP1L	3.10711e-42	0.720525	0.589	0.191	5.64035e-38
PIM3	3.41826e-58	0.720427	0.723	0.263	6.20517e-54
ADGRL2	6.38701e-33	0.718202	0.808	0.493	1.15943e-28
CREB3L2	1.91449e-44	0.717729	0.826	0.443	3.47538e-40
CEBPD	1.18e-32	0.716422	0.621	0.272	2.14206e-28
CYFIP1	1.77344e-41	0.713337	0.817	0.507	3.21932e-37
SERP1	1.79425e-33	0.712912	0.875	0.657	3.2571e-29
CORO1B	2.75183e-43	0.712378	0.79	0.419	4.9954e-39
REXO2	5.29085e-40	0.710358	0.835	0.52	9.60447e-36
COMT	7.27903e-40	0.710065	0.804	0.479	1.32136e-35
PPFIBP1	2.52664e-28	0.707597	0.719	0.446	4.58662e-24
CALD1	8.77905e-36	0.707061	0.969	0.881	1.59366e-31
WIPF1	5.5655e-43	0.70666	0.67	0.289	1.0103e-38
IRF6	6.74935e-137	0.70628	0.513	0.021	1.22521e-132
NECTIN4	1.89745e-171	0.706146	0.527	0.006	3.44445e-167
CREB3L1	2.70994e-37	0.706023	0.67	0.279	4.91935e-33
GFPT1	5.8839e-36	0.705298	0.821	0.519	1.0681e-31
SNAI2	9.81401e-21	0.703764	0.496	0.234	1.78154e-16
RUNX1	3.80503e-123	0.702932	0.446	0.015	6.90727e-119
NPEPPS	5.4479e-32	0.70246	0.875	0.685	9.88957e-28
PCDH17	2.76454e-10	0.70174	0.442	0.261	5.01847e-06
SERINC5	6.44142e-29	0.701635	0.839	0.613	1.16931e-24
RAB9A	3.57058e-46	0.700802	0.674	0.26	6.48168e-42
RPL13A	4.80022e-44	0.69858	0.991	0.957	8.71383e-40
CDS1	2.9986e-90	0.693622	0.607	0.097	5.44336e-86
RAB32	6.72184e-52	0.692919	0.638	0.207	1.22021e-47
RPL18A	1.82424e-55	0.692132	1	0.999	3.31154e-51
TMSB10	1.93453e-27	0.691339	1	0.944	3.51175e-23
WWC3	1.74727e-35	0.688836	0.781	0.496	3.17182e-31
HINT1	5.23165e-42	0.688141	0.969	0.947	9.49702e-38
KDELR2	5.33494e-37	0.686995	0.933	0.734	9.68451e-33
TCF4	3.5838e-18	0.686618	0.821	0.645	6.50568e-14
CD74	7.22403e-35	0.68477	0.549	0.203	1.31138e-30
IRS2	4.65398e-27	0.68229	0.522	0.209	8.44837e-23
FLJ44635	6.68646e-34	0.6809	0.862	0.605	1.21379e-29
CNN3	1.50735e-34	0.680654	0.875	0.552	2.73629e-30
TNFRSF21	1.15905e-33	0.68057	0.679	0.331	2.10403e-29
TUBA1B	9.89046e-16	0.679873	0.991	0.983	1.79542e-11
QPRT	1.12481e-34	0.6795	0.946	0.846	2.04187e-30
ACSL3	4.02517e-29	0.677025	0.862	0.716	7.3069e-25
ZNF395	3.51476e-32	0.67629	0.812	0.508	6.38034e-28
TEX2	4.05828e-31	0.67437	0.754	0.473	7.36699e-27
ZNF706	1.99387e-40	0.674061	0.848	0.533	3.61948e-36
TNPO1	2.10804e-29	0.673005	0.839	0.747	3.82673e-25
FTH1	6.74407e-46	0.672273	0.991	0.993	1.22425e-41
CLIP1	1.06285e-32	0.671682	0.768	0.475	1.9294e-28
KRT7	9.42736e-86	0.671002	0.312	0.01	1.71135e-81
EFNA5	5.69245e-29	0.669969	0.857	0.586	1.03335e-24
FXYD5	3.66983e-66	0.668234	0.732	0.209	6.66184e-62
COL1A2	1.13334e-37	0.666919	0.942	0.704	2.05736e-33
LAYN	2.38674e-59	0.666465	0.518	0.112	4.33265e-55
CD47	3.1233e-25	0.665974	0.844	0.602	5.66973e-21
ITM2C	2.31983e-25	0.664915	0.946	0.934	4.21119e-21
BAIAP2L1	1.29583e-77	0.663437	0.598	0.114	2.35233e-73
FAM129B	5.69858e-36	0.663211	0.768	0.428	1.03446e-31
ACTN1	4.92676e-24	0.662283	0.911	0.773	8.94355e-20
RGCC	1.669e-102	0.661296	0.357	0.009	3.02973e-98
ANP32B	1.68674e-33	0.66127	0.955	0.867	3.06194e-29
SLC22A23	9.9279e-57	0.660028	0.576	0.146	1.80221e-52
EIF2AK1	8.64906e-35	0.659905	0.902	0.723	1.57006e-30
RPL41	2.23808e-53	0.656549	1	1	4.06279e-49
TMBIM1	5.87159e-36	0.652439	0.777	0.453	1.06587e-31
USP12	4.89152e-35	0.650919	0.71	0.379	8.87958e-31
GALNT7	2.23998e-40	0.648858	0.67	0.29	4.06623e-36
MTUS2	2.19273e-12	0.648478	0.737	0.605	3.98047e-08
ADAMTS2	3.03343e-96	0.648012	0.531	0.059	5.50658e-92
RBM47	4.14166e-103	0.643329	0.482	0.037	7.51835e-99
RPL27A	1.91183e-45	0.63947	1	0.994	3.47055e-41
ESYT2	4.50464e-39	0.639105	0.817	0.483	8.17727e-35
PGM2	5.35794e-51	0.639092	0.679	0.233	9.72627e-47
MATN3	1.53082e-87	0.638971	0.415	0.033	2.77891e-83
SNRPB	1.33908e-31	0.63756	0.902	0.729	2.43084e-27
SH3BGRL2	1.62554e-32	0.637455	0.719	0.387	2.95084e-28
CDK2AP1	2.93382e-27	0.636808	0.902	0.771	5.32575e-23
PP14571	3.30509e-124	0.636781	0.429	0.011	5.99972e-120
FZD6	6.32036e-30	0.634244	0.692	0.387	1.14734e-25
RPS16	6.96156e-42	0.634038	0.996	0.99	1.26373e-37
HS3ST1	9.17559e-110	0.63278	0.415	0.016	1.66565e-105
RPS13	3.16656e-46	0.632775	1	0.997	5.74826e-42
EFNB2	2.61592e-25	0.63242	0.871	0.596	4.74867e-21
RPS5	1.65878e-48	0.630186	1	0.988	3.01118e-44
SGPP1	2.27297e-39	0.629969	0.612	0.243	4.12612e-35
SKIL	1.48047e-20	0.629747	0.786	0.623	2.6875e-16
ARF4	2.17004e-34	0.628408	0.969	0.878	3.93927e-30
LMAN1	3.78273e-28	0.62641	0.826	0.615	6.86679e-24
TRAM1	5.68896e-32	0.624967	0.875	0.652	1.03272e-27
PATJ	1.15613e-43	0.623476	0.665	0.253	2.09873e-39
EGLN1	2.61797e-23	0.622873	0.719	0.484	4.75239e-19
SLC39A10	6.55957e-27	0.621021	0.795	0.553	1.19076e-22
PTP4A1	2.36206e-24	0.620959	0.839	0.659	4.28785e-20
FREM2	2.87163e-17	0.620439	0.777	0.555	5.21287e-13
EPS8L2	1.07528e-103	0.61887	0.554	0.059	1.95195e-99
TM9SF2	1.82952e-31	0.617433	0.884	0.715	3.32112e-27
NT5DC2	6.26488e-24	0.617355	0.844	0.678	1.13726e-19
NEDD9	1.94843e-49	0.615516	0.509	0.125	3.53699e-45
ZNF217	4.24711e-31	0.614912	0.683	0.369	7.70977e-27
CCBE1	1.07404e-37	0.614892	0.518	0.175	1.9497e-33
RUNX1T1	4.25391e-20	0.612493	0.902	0.819	7.72212e-16
LAMP2	2.27897e-31	0.611216	0.866	0.663	4.13701e-27
TANC2	2.96834e-29	0.610908	0.768	0.483	5.38842e-25
USP25	2.43785e-30	0.609564	0.732	0.432	4.42543e-26
TMED9	3.60829e-26	0.609223	0.857	0.653	6.55012e-22
TCF7L1	4.62382e-33	0.608444	0.821	0.495	8.39363e-29
STK26	3.16177e-33	0.608354	0.705	0.345	5.73956e-29
GLCCI1	1.69254e-22	0.608351	0.741	0.523	3.07246e-18
ADAMTS1	2.01482e-08	0.608242	0.464	0.313	0.000365751
MAZ	4.50387e-32	0.607179	0.888	0.731	8.17588e-28
WWC1	1.55025e-69	0.607106	0.562	0.111	2.81417e-65
MARCKSL1	4.96222e-28	0.606765	0.969	0.935	9.00793e-24
LSM14A	2.83033e-29	0.603867	0.92	0.795	5.13789e-25
AP1G2	1.80642e-29	0.603409	0.701	0.387	3.2792e-25
ASAP2	2.13172e-38	0.603142	0.701	0.312	3.86972e-34
ASAP1	1.39282e-21	0.602243	0.893	0.73	2.52839e-17
SH3KBP1	1.70947e-20	0.600512	0.795	0.571	3.1032e-16
SLC35B3	4.29256e-30	0.600204	0.683	0.37	7.79228e-26
SOWAHC	9.7822e-30	0.599576	0.594	0.261	1.77576e-25
SNHG5	1.18534e-25	0.599315	0.853	0.654	2.15175e-21
ALOX15	8.32093e-86	0.598607	0.371	0.022	1.5105e-81
PLAU	1.25955e-41	0.598446	0.232	0.023	2.28645e-37
NSMCE3	1.16816e-26	0.597451	0.607	0.288	2.12056e-22
CAP1	4.33449e-30	0.597386	0.938	0.762	7.8684e-26
NSG1	1.47264e-42	0.596616	0.571	0.185	2.67329e-38
HNRNPDL	4.53484e-25	0.596459	0.946	0.717	8.23209e-21
LIMK2	1.91718e-33	0.59625	0.585	0.251	3.48026e-29
DNMT1	1.5656e-18	0.594467	0.71	0.528	2.84203e-14
RAB1B	4.63361e-29	0.593533	0.853	0.687	8.41138e-25
FST	1.68282e-25	0.592043	0.571	0.256	3.05482e-21
RPL15	4.29766e-53	0.588894	1	1	7.80154e-49
P4HB	8.15407e-30	0.588514	0.924	0.813	1.48021e-25
LBH	1.65672e-10	0.587735	0.826	0.717	3.00744e-06
AXL	2.26694e-18	0.586935	0.817	0.689	4.11518e-14
ENPP1	1.51922e-95	0.586617	0.487	0.045	2.75785e-91
SH2D4A	1.35727e-92	0.586258	0.455	0.037	2.46384e-88
FZD2	1.37047e-21	0.586049	0.804	0.619	2.48781e-17
HSP90B1	1.86523e-25	0.58535	0.991	0.952	3.38595e-21
ENTPD4	1.00462e-26	0.585247	0.848	0.687	1.82368e-22
CSRNP1	7.40272e-47	0.585092	0.518	0.139	1.34382e-42
PPIA	1.11882e-42	0.583469	1	0.998	2.031e-38
TBCA	1.10764e-34	0.581963	0.969	0.869	2.0107e-30
OLFML2A	3.81715e-18	0.581836	0.688	0.481	6.92926e-14
SP3	8.90912e-28	0.580241	0.754	0.483	1.61727e-23
RPL30	1.42372e-36	0.580227	1	0.995	2.58447e-32
HIC2	1.87112e-28	0.579553	0.661	0.347	3.39664e-24
RPL14	2.642e-44	0.578725	0.996	0.996	4.79603e-40
MARVELD3	7.93234e-89	0.575653	0.536	0.068	1.43996e-84
C15orf48	3.68117e-98	0.574799	0.317	0.005	6.68242e-94
EGFR	2.0195e-87	0.574785	0.5	0.057	3.66599e-83
BRI3	3.64702e-32	0.573914	0.933	0.824	6.62043e-28
ANKRD34B	1.53594e-90	0.573372	0.304	0.006	2.78818e-86
HDAC7	2.79284e-22	0.57228	0.772	0.555	5.06985e-18
RCN1	1.17459e-28	0.57188	0.866	0.602	2.13224e-24
MTR	1.90077e-22	0.571689	0.799	0.589	3.45047e-18
ENSA	1.74248e-28	0.571121	0.804	0.539	3.16312e-24
KIAA1522	4.5703e-29	0.570722	0.696	0.39	8.29646e-25
TRMT112	8.73141e-32	0.570582	0.964	0.834	1.58501e-27
VAV2	1.88862e-47	0.570557	0.536	0.151	3.42841e-43
RELN	1.23239e-09	0.570468	0.585	0.427	2.23716e-05
SEPT10	9.43496e-29	0.569767	0.826	0.581	1.71273e-24
TMCO3	7.76216e-35	0.568964	0.692	0.349	1.40907e-30
FASN	1.60147e-19	0.568894	0.826	0.671	2.90715e-15
ZNF521	5.2405e-19	0.568436	0.683	0.449	9.51309e-15
AP2S1	9.71277e-28	0.568359	0.871	0.649	1.76316e-23
IGSF3	3.72042e-20	0.568007	0.795	0.643	6.75369e-16
RPL12	1.47077e-33	0.566815	0.996	0.983	2.66989e-29
FCGRT	9.92656e-31	0.562619	0.737	0.392	1.80197e-26
PARVA	3.50367e-27	0.562595	0.83	0.567	6.36022e-23
RAB11A	2.35664e-27	0.562408	0.915	0.819	4.278e-23
GRB10	2.13147e-33	0.562076	0.558	0.207	3.86926e-29
PERP	2.95686e-21	0.561151	0.862	0.703	5.36759e-17
CAPZB	3.53391e-30	0.558408	0.933	0.827	6.41511e-26
SLC25A17	1.20819e-29	0.557041	0.589	0.274	2.19323e-25
EEF1B2	1.09176e-31	0.556617	0.982	0.963	1.98188e-27
FOXN3	7.59291e-20	0.553669	0.893	0.793	1.37834e-15
MYOF	7.04163e-25	0.552021	0.71	0.403	1.27827e-20
MFAP2	7.24961e-29	0.551797	0.884	0.644	1.31602e-24
DCN	8.38484e-44	0.551752	0.5	0.126	1.5221e-39
QPCT	2.69345e-76	0.551302	0.469	0.059	4.88942e-72
DFNA5	8.0713e-40	0.55116	0.589	0.205	1.46518e-35
LOC400043	2.80971e-42	0.549606	0.344	0.061	5.10047e-38
BNC2	6.40564e-39	0.549532	0.504	0.151	1.16281e-34
CMTM6	3.25293e-29	0.549325	0.804	0.55	5.90504e-25
ADAM10	1.49043e-23	0.548813	0.741	0.49	2.70558e-19
INHBA	7.60093e-22	0.548731	0.371	0.128	1.3798e-17
ZBTB38	9.5709e-37	0.547892	0.705	0.331	1.7374e-32
PPDPF	8.14857e-28	0.547009	0.969	0.925	1.47921e-23
CEMIP	1.74566e-56	0.54672	0.379	0.05	3.16889e-52
MED13L	4.46199e-20	0.546203	0.808	0.618	8.09985e-16
MBNL2	2.10033e-23	0.545524	0.79	0.553	3.81273e-19
FARP1	3.22395e-21	0.544821	0.839	0.691	5.85243e-17
ST3GAL5	9.04925e-18	0.543438	0.429	0.203	1.64271e-13
CHN2	1.49087e-31	0.542154	0.527	0.204	2.70638e-27
MBD2	3.88666e-34	0.541843	0.754	0.409	7.05545e-30
MBOAT7	6.7808e-30	0.541176	0.714	0.413	1.23092e-25
RFK	2.36744e-23	0.540698	0.625	0.375	4.29761e-19
SEPT9	3.29975e-24	0.540301	0.853	0.642	5.99004e-20
UBE2D3	1.13857e-28	0.539145	0.982	0.942	2.06685e-24
SLC39A1	1.2896e-34	0.537716	0.741	0.398	2.34102e-30
MOB1A	1.22133e-26	0.537065	0.759	0.474	2.21707e-22
PDZRN3	9.13976e-16	0.53669	0.701	0.527	1.65914e-11
HNRNPAB	5.48053e-18	0.535949	0.888	0.781	9.94881e-14
RPL23A	9.05022e-29	0.534488	1	0.989	1.64289e-24
ARPC2	1.0905e-30	0.534314	0.991	0.974	1.97958e-26
CDK6	6.7965e-14	0.533129	0.817	0.743	1.23377e-09
PAPSS1	1.17715e-26	0.532654	0.768	0.495	2.13688e-22
CDC42EP3	1.85427e-20	0.532443	0.906	0.799	3.36605e-16
PLEKHG4B	4.31765e-26	0.532116	0.638	0.342	7.83782e-22
IL32	5.59958e-60	0.531601	0.353	0.039	1.01649e-55
ATP6V0C	6.33477e-26	0.531163	0.942	0.925	1.14995e-21
LARP1	2.65549e-30	0.530565	0.978	0.917	4.8205e-26
GPRC5B	6.22686e-29	0.529367	0.504	0.196	1.13036e-24
ZNF83	3.96928e-15	0.529224	0.929	0.849	7.20544e-11
KCNK1	1.23715e-101	0.529223	0.438	0.026	2.2458e-97
FDFT1	4.49468e-19	0.528548	0.875	0.729	8.15919e-15
SERPINB2	2.64151e-71	0.528538	0.317	0.019	4.79514e-67
RPL34	1.69461e-40	0.528532	1	0.999	3.07623e-36
RHBDF1	8.47039e-29	0.527523	0.71	0.388	1.53763e-24
PRKCH	5.0885e-34	0.527366	0.616	0.262	9.23715e-30
TNFSF15	2.93444e-32	0.526777	0.259	0.045	5.3269e-28
CKMT2	2.26542e-18	0.526162	0.554	0.304	4.11241e-14
MOB3B	2.0846e-90	0.525734	0.509	0.056	3.78417e-86
DIAPH3	6.4862e-41	0.525347	0.451	0.117	1.17744e-36
FAM63B	1.34816e-15	0.524777	0.795	0.651	2.44731e-11
GCSH	1.68564e-27	0.524506	0.656	0.338	3.05993e-23
ROR1	1.26762e-19	0.524385	0.821	0.601	2.30112e-15
RPL28	5.43309e-26	0.523569	0.996	0.981	9.86268e-22
VWA5A	2.07848e-18	0.523419	0.679	0.458	3.77306e-14
TNC	7.50251e-34	0.522126	0.607	0.225	1.36193e-29
P2RY6	6.13742e-111	0.522071	0.379	0.009	1.11413e-106
PDXDC1	8.22991e-23	0.521828	0.75	0.515	1.49398e-18
RPS27A	2.0396e-33	0.521202	1	0.998	3.70248e-29
PXN	6.06879e-24	0.520759	0.759	0.5	1.10167e-19
BOK	2.97779e-41	0.520362	0.58	0.198	5.40558e-37
STAT6	4.98854e-21	0.519841	0.786	0.543	9.0557e-17
HSPA8	8.2255e-25	0.518679	0.987	0.985	1.49317e-20
RPS3A	6.76065e-36	0.518587	1	0.999	1.22726e-31
FBXL3	1.13711e-26	0.517989	0.737	0.445	2.0642e-22
NEDD4L	2.18882e-21	0.517589	0.719	0.458	3.97336e-17
TACSTD2	1.24957e-113	0.517132	0.366	0.005	2.26835e-109
RPS15A	2.96978e-31	0.516812	1	0.998	5.39105e-27
NXPH2	4.02235e-33	0.516705	0.625	0.247	7.30178e-29
RCN2	1.72799e-24	0.516649	0.835	0.648	3.13682e-20
CTSL	1.20087e-19	0.515743	0.652	0.391	2.17993e-15
ARPC3	1.11751e-24	0.515029	0.897	0.735	2.02862e-20
ADAM9	4.05326e-26	0.514384	0.777	0.503	7.35788e-22
RPS17	1.61555e-19	0.513375	0.955	0.725	2.9327e-15
LSM4	5.1546e-19	0.513212	0.839	0.709	9.35715e-15
SRC	2.347e-42	0.513159	0.562	0.176	4.26052e-38
ADH5	9.30131e-22	0.513158	0.924	0.869	1.68847e-17
PKNOX1	7.66658e-29	0.512683	0.598	0.273	1.39171e-24
FAM110B	2.26087e-21	0.512296	0.643	0.361	4.10416e-17
ITM2B	2.8958e-13	0.51083	0.982	0.976	5.25674e-09
STT3B	2.32087e-23	0.510792	0.888	0.673	4.21307e-19
RPS6KA2	1.40329e-19	0.508468	0.804	0.58	2.54739e-15
CMPK1	7.55895e-24	0.506898	0.772	0.535	1.37218e-19
PTS	2.82552e-27	0.506465	0.652	0.347	5.12917e-23
PPP1R13L	1.247e-25	0.504598	0.638	0.331	2.26368e-21
PIK3R1	5.15876e-12	0.503904	0.603	0.413	9.36469e-08
CNDP2	1.79109e-29	0.503799	0.674	0.375	3.25137e-25
DBI	4.44681e-24	0.503464	0.795	0.592	8.07229e-20
SURF4	1.3113e-24	0.502603	0.888	0.656	2.3804e-20
SIAH2	2.73754e-20	0.500311	0.598	0.351	4.96946e-16
RPL37	4.09604e-28	0.499198	1	0.998	7.43554e-24
FAM49B	7.78612e-20	0.49911	0.772	0.557	1.41341e-15
FKBP1A	4.14446e-14	0.498635	0.933	0.859	7.52343e-10
BEX3	2.25586e-14	0.498282	0.955	0.75	4.09506e-10
SUMO2	2.41045e-28	0.497421	0.982	0.945	4.37568e-24
PCSK5	5.54648e-53	0.496202	0.46	0.095	1.00685e-48
ARPC1B	8.91756e-29	0.495903	0.634	0.296	1.6188e-24
TPP1	1.78775e-18	0.495868	0.75	0.537	3.2453e-14
CKS1B	1.0059e-13	0.492992	0.714	0.527	1.82602e-09
SLC9A1	3.45727e-39	0.492354	0.576	0.204	6.27597e-35
EVA1B	8.92721e-30	0.491823	0.607	0.26	1.62056e-25
CAPG	3.80372e-67	0.491094	0.518	0.092	6.90489e-63
WNT6	3.81068e-136	0.490712	0.411	0.003	6.91753e-132
PHACTR2	1.74563e-15	0.490095	0.754	0.605	3.16884e-11
ENDOD1	2.8041e-59	0.488338	0.504	0.099	5.09029e-55
PTGES	1.43247e-51	0.487818	0.402	0.067	2.60037e-47
RPL10	1.15e-32	0.487208	1	1	2.08759e-28
TGOLN2	3.12097e-19	0.486783	0.777	0.573	5.6655e-15
BDKRB2	1.5679e-70	0.486587	0.42	0.049	2.84621e-66
MFAP5	5.62356e-46	0.486319	0.214	0.015	1.02084e-41
BHLHE40	1.3064e-67	0.485715	0.464	0.067	2.3715e-63
HCFC1R1	6.45218e-24	0.48546	0.723	0.431	1.17126e-19
DHRS3	2.30072e-83	0.484563	0.379	0.025	4.17649e-79
NET1	4.69736e-14	0.483638	0.527	0.319	8.52713e-10
APBB2	2.02883e-29	0.483405	0.598	0.263	3.68293e-25
RHOA	4.70325e-27	0.483393	0.969	0.955	8.53781e-23
MYO1D	9.91509e-26	0.483135	0.652	0.334	1.79989e-21
SPSB1	5.67057e-42	0.482435	0.513	0.142	1.02938e-37
RPS11	1.7632e-25	0.482358	1	0.991	3.20073e-21
RAB1A	1.05729e-24	0.482242	0.933	0.869	1.9193e-20
HNRNPA2B1	8.00969e-30	0.481494	0.982	0.984	1.454e-25
HOXB2	2.44684e-16	0.480681	0.576	0.337	4.44175e-12
HIF1A	4.75621e-19	0.480675	0.576	0.324	8.63395e-15
TRIM28	3.16124e-23	0.480441	0.964	0.946	5.73859e-19
TENM3	2.12205e-15	0.480397	0.723	0.536	3.85216e-11
NORAD	1.03003e-20	0.480318	0.92	0.683	1.86981e-16
CCND2	6.59211e-11	0.480125	0.929	0.885	1.19667e-06
CELSR1	4.82936e-23	0.480092	0.594	0.308	8.76674e-19
KCNQ5	5.50402e-27	0.480023	0.527	0.213	9.99145e-23
MYO1C	9.43516e-23	0.478848	0.826	0.622	1.71276e-18
NECTIN2	3.85811e-26	0.478034	0.723	0.395	7.00363e-22
HNRNPC	1.00407e-26	0.476999	0.996	0.977	1.82269e-22
UBA1	4.90069e-23	0.475847	0.969	0.95	8.89623e-19
SPECC1	1.12093e-29	0.475771	0.634	0.293	2.03483e-25
SKI	1.27582e-24	0.474874	0.799	0.579	2.316e-20
TPM1	1.40872e-24	0.473889	1	1	2.55726e-20
APMAP	2.48487e-22	0.47378	0.746	0.479	4.51079e-18
HP1BP3	1.71427e-21	0.473651	0.893	0.753	3.11191e-17
ST13	2.12393e-22	0.472963	0.924	0.823	3.85557e-18
PNP	8.21484e-43	0.472775	0.455	0.113	1.49124e-38
NUAK1	3.12098e-20	0.472145	0.576	0.299	5.66551e-16
ATP6AP2	2.2966e-19	0.472088	0.857	0.745	4.16901e-15
ITGB1	7.34377e-25	0.471763	0.982	0.968	1.33312e-20
BTF3	7.82749e-26	0.471425	0.991	0.945	1.42092e-21
ARID5B	3.53427e-13	0.470683	0.567	0.366	6.41576e-09
IQCA1	1.06023e-27	0.469746	0.527	0.206	1.92463e-23
RIMS2	1.17987e-66	0.469627	0.353	0.033	2.14182e-62
SF3B4	1.01375e-17	0.469531	0.875	0.764	1.84026e-13
MRPL33	7.38841e-17	0.467914	0.799	0.644	1.34122e-12
GDNF	3.29387e-83	0.467435	0.357	0.021	5.97935e-79
OAT	1.40362e-23	0.466773	0.638	0.348	2.548e-19
YTHDF1	7.57524e-19	0.466622	0.728	0.515	1.37513e-14
ATIC	1.06251e-16	0.466607	0.71	0.509	1.92878e-12
LHX1	1.40537e-93	0.466258	0.326	0.008	2.55118e-89
KDELR1	6.60826e-20	0.46599	0.964	0.893	1.1996e-15
TMCC3	8.95812e-75	0.465667	0.442	0.051	1.62617e-70
PAGR1	3.86944e-14	0.464787	0.719	0.549	7.02419e-10
HMGN1	1.06048e-23	0.462914	0.978	0.979	1.92508e-19
RALGPS2	7.96076e-23	0.461908	0.643	0.355	1.44512e-18
PON2	6.38114e-16	0.461579	0.826	0.701	1.15837e-11
ANXA4	8.21433e-27	0.461557	0.67	0.348	1.49115e-22
SEMA3C	4.91201e-19	0.460694	0.71	0.414	8.91677e-15
CLTA	4.97885e-26	0.460557	0.866	0.649	9.03811e-22
SH3D19	5.44453e-25	0.458957	0.674	0.356	9.88346e-21
PTEN	4.58306e-13	0.45818	0.808	0.688	8.31963e-09
CDK4	4.91964e-18	0.458015	0.857	0.679	8.93062e-14
TXN	6.167e-19	0.457346	0.879	0.753	1.1195e-14
GNAI1	2.99459e-31	0.455965	0.652	0.286	5.43607e-27
LPL	4.86638e-25	0.454545	0.107	0.006	8.83393e-21
ITGAV	1.01003e-16	0.454288	0.897	0.781	1.83351e-12
NRM	1.48108e-34	0.454185	0.625	0.253	2.6886e-30
CLN8	3.25451e-19	0.454144	0.603	0.352	5.90791e-15
ELF4	2.41617e-48	0.453507	0.42	0.081	4.38607e-44
TEAD1	1.52872e-14	0.45332	0.853	0.79	2.77508e-10
WFDC2	3.36e-55	0.453227	0.451	0.082	6.09942e-51
CLIC1	6.7984e-14	0.452946	0.835	0.71	1.23411e-09
COTL1	6.28515e-18	0.452917	0.371	0.147	1.14094e-13
TSEN34	4.9895e-16	0.452703	0.826	0.676	9.05744e-12
SLC2A8	6.40937e-36	0.451887	0.58	0.213	1.16349e-31
SLC2A13	2.47851e-30	0.451432	0.464	0.154	4.49923e-26
RPS21	7.00447e-21	0.450817	0.987	0.957	1.27152e-16
RPL10A	2.20755e-32	0.450246	1	0.999	4.00736e-28
CDC25B	4.38067e-29	0.450221	0.42	0.135	7.95223e-25
BAIAP2	9.5785e-39	0.450215	0.576	0.2	1.73879e-34
HNRNPM	6.49523e-16	0.450042	0.906	0.813	1.17908e-11
ETS1	2.41161e-14	0.449574	0.33	0.132	4.37779e-10
DSP	4.16393e-08	0.449512	0.924	0.915	0.000755879
GALNT1	1.38778e-15	0.448708	0.799	0.636	2.51924e-11
PRRC1	1.16294e-20	0.448676	0.772	0.527	2.11109e-16
EFEMP1	6.85439e-63	0.448282	0.473	0.075	1.24428e-58
ESRP1	2.8521e-67	0.448151	0.491	0.075	5.17741e-63
CCDC186	1.04373e-23	0.448105	0.67	0.347	1.89468e-19
FLNA	4.13071e-22	0.447856	0.946	0.751	7.49847e-18
KLHL36	8.58587e-28	0.446942	0.594	0.267	1.55859e-23
ITIH5	6.01687e-58	0.446743	0.393	0.057	1.09224e-53
ZYX	4.54734e-14	0.446591	0.92	0.864	8.2548e-10
TEAD3	4.08295e-16	0.446414	0.866	0.747	7.41178e-12
ARHGAP40	1.18964e-88	0.446101	0.277	0.003	2.15955e-84
HMGB1	1.86783e-15	0.444332	0.987	0.976	3.39066e-11
PCNA	2.28363e-11	0.443518	0.509	0.318	4.14547e-07
PTMS	1.73437e-17	0.443462	0.96	0.934	3.14841e-13
HSBP1L1	2.40486e-39	0.443203	0.509	0.158	4.36555e-35
SEC61G	1.30933e-20	0.443177	0.946	0.846	2.37683e-16
LYPD6B	8.75591e-100	0.442338	0.379	0.015	1.58946e-95
RPL35	5.14112e-24	0.442132	0.996	0.982	9.33267e-20
PARP14	3.45411e-34	0.441358	0.473	0.15	6.27025e-30
RPS23	3.78287e-30	0.440703	1	0.999	6.86704e-26
TUBB3	3.74178e-14	0.439786	0.384	0.173	6.79246e-10
HSPA1B	3.329e-26	0.436792	0.634	0.305	6.04313e-22
ATL3	6.36385e-37	0.436766	0.54	0.169	1.15523e-32
UFM1	7.27255e-16	0.436002	0.746	0.555	1.32019e-11
PRPS2	2.65037e-61	0.435282	0.433	0.065	4.81122e-57
EMP3	1.27555e-11	0.435276	0.71	0.52	2.3155e-07
GALNT2	8.34516e-13	0.434887	0.723	0.589	1.5149e-08
C8orf58	4.05799e-27	0.43482	0.522	0.219	7.36647e-23
AFAP1L2	2.63816e-87	0.434444	0.393	0.025	4.78906e-83
ALAD	1.13733e-17	0.434221	0.665	0.434	2.0646e-13
TMED2	3.99203e-17	0.434187	0.835	0.692	7.24674e-13
CDC42	2.56585e-18	0.433579	0.978	0.933	4.65778e-14
LMCD1	7.0072e-33	0.433406	0.438	0.131	1.27202e-28
GLIPR1	3.73317e-67	0.433269	0.348	0.03	6.77682e-63
SLC12A2	3.8262e-14	0.433192	0.665	0.446	6.9457e-10
LAD1	3.30512e-54	0.433112	0.411	0.067	5.99978e-50
OCLN	1.11567e-19	0.432839	0.594	0.321	2.02527e-15
CNTNAP2	4.95503e-48	0.432829	0.299	0.036	8.99487e-44
SEPT11	3.50977e-16	0.431944	0.808	0.663	6.37128e-12
SAMD5	4.49492e-58	0.431801	0.375	0.049	8.15962e-54
TMEM30B	5.34805e-102	0.431778	0.357	0.009	9.70831e-98
CALU	7.12586e-19	0.431458	0.92	0.882	1.29356e-14
SNHG8	4.55061e-14	0.431361	0.737	0.571	8.26072e-10
VMP1	1.06343e-12	0.430646	0.786	0.599	1.93044e-08
BASP1	1.02007e-13	0.430517	0.871	0.749	1.85173e-09
CENPB	1.91833e-16	0.430046	0.759	0.547	3.48235e-12
HID1	1.88264e-37	0.429923	0.473	0.133	3.41755e-33
OST4	8.85908e-18	0.429268	0.96	0.917	1.60819e-13
CRABP1	4.24541e-12	0.429227	0.134	0.033	7.70669e-08
DOCK3	2.71732e-101	0.428928	0.402	0.018	4.93274e-97
SLC38A2	1.40194e-15	0.428839	0.969	0.945	2.54495e-11
ATP6AP1	3.64615e-16	0.428317	0.857	0.731	6.61886e-12
SGMS2	2.11432e-71	0.428092	0.393	0.04	3.83813e-67
CPNE2	1.26819e-32	0.427122	0.576	0.207	2.30215e-28
PCBP1	5.14477e-24	0.427006	0.991	0.982	9.3393e-20
AGRN	1.7572e-22	0.426975	0.821	0.564	3.18985e-18
BCKDHB	1.20616e-20	0.426846	0.567	0.299	2.18954e-16
CD40	1.24215e-102	0.426148	0.321	0.003	2.25488e-98
ITPR2	8.81828e-24	0.425753	0.464	0.185	1.60078e-19
RPL11	2.86996e-26	0.425225	1	0.996	5.20984e-22
LCORL	1.18504e-16	0.425009	0.679	0.452	2.1512e-12
EI24	2.21375e-14	0.425002	0.844	0.76	4.01863e-10
MESDC2	1.07483e-17	0.424793	0.759	0.558	1.95114e-13
RAN	2.94733e-19	0.424043	0.955	0.901	5.35029e-15
GNB1	2.40143e-17	0.423596	0.929	0.877	4.35931e-13
CDK2AP2	1.38837e-16	0.422607	0.701	0.505	2.52031e-12
PIEZO1	3.27702e-49	0.422015	0.504	0.122	5.94877e-45
KLF8	3.21759e-23	0.421245	0.504	0.221	5.84089e-19
ENC1	5.77414e-39	0.419564	0.469	0.122	1.04818e-34
SLC10A3	2.84784e-24	0.419415	0.567	0.27	5.16969e-20
RAB20	3.43483e-75	0.419345	0.442	0.051	6.23524e-71
SRPRA	5.64349e-18	0.419231	0.741	0.483	1.02446e-13
HGSNAT	8.91016e-18	0.418363	0.719	0.491	1.61746e-13
ELF1	1.24585e-28	0.417344	0.554	0.227	2.2616e-24
SLBP	1.86745e-13	0.417343	0.652	0.453	3.38997e-09
IRX2	1.83187e-44	0.416168	0.375	0.068	3.3254e-40
DPY19L1	1.35221e-13	0.416039	0.723	0.541	2.45466e-09
FBXO17	1.54408e-13	0.415166	0.741	0.586	2.80297e-09
NEDD4	3.33232e-25	0.415131	0.5	0.207	6.04915e-21
HNRNPD	2.80472e-19	0.41475	0.978	0.962	5.09141e-15
CYP1B1	1.36628e-25	0.414569	0.179	0.025	2.48021e-21
DHCR24	1.67651e-12	0.414495	0.58	0.387	3.04337e-08
PPL	1.18751e-37	0.413476	0.509	0.151	2.15569e-33
BTBD3	9.20404e-19	0.413453	0.612	0.355	1.67081e-14
NBEAL2	6.20573e-53	0.412837	0.464	0.093	1.12653e-48
TAPBP	9.24562e-16	0.412082	0.647	0.422	1.67836e-11
RPS3	4.29557e-19	0.411347	1	0.991	7.79775e-15
SHFM1	1.29294e-16	0.410572	0.795	0.588	2.34707e-12
CD63	9.30464e-21	0.409948	0.973	0.95	1.68907e-16
COPB1	3.55253e-17	0.409921	0.888	0.78	6.44891e-13
ARCN1	1.04235e-15	0.409822	0.83	0.744	1.89218e-11
DUSP14	1.55671e-14	0.409377	0.656	0.435	2.8259e-10
RPS7	9.78182e-25	0.409336	1	0.999	1.77569e-20
NKAIN4	2.23776e-99	0.408836	0.344	0.008	4.0622e-95
G6PD	2.65928e-23	0.408497	0.589	0.285	4.82738e-19
PBX1	1.55982e-12	0.407902	0.942	0.914	2.83153e-08
UBA52	1.60862e-15	0.40752	0.987	0.967	2.92013e-11
STMN1	1.46247e-10	0.406336	0.969	0.953	2.65483e-06
NAV2	4.40579e-11	0.406208	0.688	0.538	7.99782e-07
TRIM56	3.43138e-25	0.405876	0.598	0.287	6.22899e-21
DAZAP2	3.97037e-18	0.405716	0.839	0.692	7.20742e-14
MCL1	1.31295e-13	0.405518	0.812	0.668	2.3834e-09
RACK1	2.71743e-14	0.405494	0.955	0.75	4.93295e-10
TDRP	2.30183e-15	0.405301	0.625	0.371	4.17852e-11
RAB7A	9.79236e-16	0.404997	0.906	0.85	1.77761e-11
RPL23	5.53598e-22	0.404598	0.996	0.997	1.00495e-17
PTGIS	8.39748e-34	0.404536	0.536	0.175	1.52439e-29
ERI1	2.17101e-24	0.404479	0.536	0.239	3.94103e-20
WDR1	4.57343e-13	0.404166	0.866	0.811	8.30214e-09
CTDSPL	8.76732e-14	0.403845	0.701	0.504	1.59153e-09
PTK2	7.47221e-16	0.402062	0.79	0.598	1.35643e-11
ATP10D	1.50344e-26	0.401849	0.5	0.194	2.7292e-22
RAP2B	2.26279e-21	0.401738	0.58	0.288	4.10764e-17
LRP11	6.38906e-44	0.401616	0.438	0.098	1.15981e-39
YPEL5	3.00565e-15	0.401377	0.862	0.731	5.45615e-11
RASAL2	1.62358e-15	0.400664	0.625	0.386	2.94729e-11
TNFRSF12A	8.51293e-20	0.400414	0.643	0.36	1.54535e-15
HMGCR	1.28717e-09	0.400405	0.638	0.474	2.3366e-05
GCNT1	2.5417e-42	0.398934	0.384	0.078	4.61395e-38
ESRP2	1.6366e-85	0.398714	0.375	0.023	2.97093e-81
TNKS1BP1	1.37253e-18	0.398702	0.701	0.449	2.49156e-14
IPO7	2.95489e-13	0.398365	0.902	0.829	5.36402e-09
TM9SF3	2.58069e-14	0.397716	0.871	0.829	4.68473e-10
SEC61B	6.60456e-18	0.397575	0.888	0.741	1.19893e-13
PSMB2	4.45113e-14	0.397433	0.839	0.697	8.08013e-10
HACD3	2.69583e-16	0.397371	0.777	0.537	4.89374e-12
PJA1	1.15269e-10	0.397311	0.594	0.417	2.09247e-06
NECTIN3	7.79153e-16	0.396759	0.549	0.295	1.4144e-11
VHL	1.17728e-14	0.396479	0.728	0.519	2.13712e-10
SLC1A6	1.10887e-87	0.395987	0.299	0.007	2.01294e-83
CLIC3	4.00617e-53	0.395896	0.366	0.051	7.2724e-49
SLC35B2	1.34581e-16	0.395545	0.621	0.384	2.44305e-12
TMEM97	4.93652e-10	0.395535	0.549	0.381	8.96127e-06
SLC7A7	2.02637e-36	0.39463	0.433	0.108	3.67848e-32
CD46	1.35785e-17	0.39426	0.75	0.527	2.46491e-13
CORO1C	1.02886e-11	0.393971	0.665	0.491	1.8677e-07
NFKB2	6.03903e-21	0.393647	0.527	0.248	1.09627e-16
GOLM1	3.55746e-15	0.393282	0.768	0.557	6.45786e-11
CHMP1B	1.12131e-16	0.393178	0.732	0.533	2.03551e-12
SV2A	1.92947e-08	0.391952	0.571	0.421	0.000350257
OLA1	2.07948e-12	0.3898	0.884	0.813	3.77487e-08
STX3	2.89308e-17	0.389444	0.598	0.349	5.2518e-13
TUFT1	4.94321e-28	0.388971	0.46	0.164	8.97342e-24
UBAP2L	5.42795e-16	0.388537	0.857	0.729	9.85335e-12
ARRDC1	1.23952e-20	0.388519	0.527	0.261	2.25011e-16
LRRN4	1.22724e-37	0.388252	0.429	0.109	2.2278e-33
B4GALT5	1.07442e-16	0.387662	0.728	0.515	1.95039e-12
CAV2	1.07074e-06	0.387526	0.75	0.687	0.0194372
BID	4.18565e-41	0.38729	0.397	0.085	7.59822e-37
ABCD3	1.58009e-13	0.387198	0.696	0.517	2.86834e-09
SMC1A	1.2121e-10	0.387176	0.696	0.553	2.20032e-06
HTATSF1	1.15014e-11	0.386695	0.79	0.667	2.08785e-07
PRLR	8.24774e-46	0.386471	0.339	0.053	1.49721e-41
ANXA11	1.34193e-17	0.385055	0.746	0.511	2.43601e-13
SOCS1	3.28867e-54	0.384992	0.33	0.039	5.96991e-50
CDR2	4.21053e-22	0.384925	0.42	0.161	7.64338e-18
SNX3	1.88776e-16	0.384533	0.96	0.901	3.42685e-12
LYPD6	8.42057e-35	0.384432	0.366	0.087	1.52859e-30
PMEL	5.59273e-30	0.384275	0.375	0.101	1.01525e-25
RPS25	7.83178e-21	0.383907	1	0.999	1.4217e-16
HNRNPK	3.86314e-22	0.383465	0.987	0.979	7.01275e-18
FTL	1.40929e-11	0.382977	0.978	0.97	2.55828e-07
TMEM64	2.25514e-18	0.382858	0.5	0.246	4.09375e-14
SYNCRIP	8.23546e-14	0.382045	0.862	0.782	1.49498e-09
PPP1CA	5.23477e-14	0.381796	0.705	0.552	9.50268e-10
DDR1	8.87646e-15	0.381724	0.821	0.619	1.61134e-10
RASSF7	1.00343e-34	0.381416	0.42	0.117	1.82152e-30
VAT1	1.80452e-17	0.380731	0.741	0.525	3.27574e-13
ACVR2A	1.74078e-19	0.380649	0.513	0.259	3.16003e-15
SLC6A15	4.32621e-69	0.380044	0.326	0.023	7.85338e-65
WWTR1	1.5943e-07	0.3798	0.612	0.491	0.00289414
CHST15	3.55707e-51	0.379774	0.272	0.025	6.45714e-47
ITPR3	1.27014e-92	0.379414	0.362	0.015	2.30568e-88
HIST1H4C	1.50809e-12	0.379231	0.536	0.316	2.73763e-08
EEF1D	1.51731e-15	0.37916	0.812	0.642	2.75438e-11
PSAP	7.04613e-15	0.379046	0.96	0.958	1.27908e-10
SC5D	8.48019e-16	0.378932	0.754	0.476	1.53941e-11
NDST1	3.47743e-15	0.378829	0.58	0.361	6.31258e-11
GDI2	1.60142e-15	0.378236	0.902	0.834	2.90705e-11
NUCKS1	3.16778e-16	0.378124	0.982	0.965	5.75046e-12
MSMO1	6.48669e-09	0.378088	0.857	0.748	0.000117753
TSPAN14	4.67747e-17	0.378071	0.558	0.307	8.49101e-13
PTPN11	1.06449e-15	0.377253	0.812	0.659	1.93237e-11
RPS27L	1.73583e-11	0.377157	0.839	0.679	3.15105e-07
EIF4B	6.74511e-20	0.376966	0.987	0.974	1.22444e-15
RNF213	1.14607e-10	0.376939	0.812	0.72	2.08047e-06
GNL1	4.415e-18	0.376134	0.576	0.319	8.01456e-14
ZNF827	7.92421e-09	0.375103	0.821	0.728	0.000143848
MYH10	9.88585e-21	0.374891	0.969	0.923	1.79458e-16
TUBB2B	3.61678e-13	0.374684	0.272	0.105	6.56555e-09
TLN2	5.394e-12	0.374476	0.692	0.519	9.79173e-08
MPDZ	6.0951e-11	0.374374	0.763	0.645	1.10644e-06
ZFP36	1.99088e-18	0.374278	0.46	0.214	3.61404e-14
FBXO30	1.07495e-08	0.373813	0.536	0.375	0.000195135
CDKN2B	3.14195e-39	0.373792	0.321	0.054	5.70359e-35
SRSF3	1.59736e-13	0.373698	0.924	0.893	2.89969e-09
FIGNL2	1.68145e-28	0.373448	0.438	0.144	3.05234e-24
LATS2	5.91982e-08	0.372102	0.629	0.509	0.00107463
OSBPL9	3.98222e-10	0.371953	0.871	0.78	7.22893e-06
ADRA1B	1.51832e-101	0.371779	0.344	0.007	2.75621e-97
OSBPL5	2.11347e-25	0.37176	0.442	0.162	3.83658e-21
TFPI2	9.70158e-12	0.371522	0.21	0.072	1.76113e-07
IFNGR2	5.99427e-14	0.37107	0.643	0.44	1.08814e-09
METRNL	5.88054e-18	0.370821	0.562	0.305	1.06749e-13
ENPEP	2.24864e-24	0.3707	0.339	0.103	4.08195e-20
RAB11B	1.42688e-15	0.369973	0.893	0.83	2.59022e-11
SNRPD1	4.99446e-16	0.369223	0.688	0.473	9.06644e-12
B4GALT4	1.10252e-17	0.369102	0.509	0.263	2.0014e-13
CD2AP	5.61476e-14	0.369084	0.692	0.485	1.01925e-09
PLD2	7.50397e-32	0.368814	0.442	0.134	1.3622e-27
ZNF430	8.28157e-27	0.368614	0.513	0.206	1.50335e-22
CAB39L	8.85254e-20	0.368606	0.518	0.248	1.607e-15
CTTN	1.14375e-12	0.367975	0.723	0.539	2.07625e-08
ERGIC3	4.91121e-14	0.367873	0.933	0.865	8.91532e-10
PPA1	1.00493e-17	0.3676	0.594	0.335	1.82425e-13
PPP2R2B	4.38944e-15	0.367455	0.299	0.113	7.96815e-11
RPS29	5.95771e-19	0.366874	1	0.996	1.0815e-14
PGS1	8.85345e-17	0.366108	0.67	0.42	1.60717e-12
CEBPB	8.71864e-31	0.365972	0.446	0.142	1.5827e-26
RPL5	5.94465e-29	0.365794	1	1	1.07913e-24
RHOB	8.89047e-15	0.365439	0.478	0.245	1.61389e-10
SKAP2	2.28956e-45	0.364977	0.411	0.081	4.15623e-41
ZBTB7A	2.3075e-15	0.364957	0.705	0.471	4.18881e-11
CDON	2.55762e-29	0.364261	0.522	0.179	4.64285e-25
RPLP1	1.78868e-12	0.364101	0.996	0.999	3.24699e-08
SH3RF1	1.62307e-46	0.364012	0.388	0.071	2.94635e-42
GRN	7.12712e-15	0.363762	0.938	0.912	1.29379e-10
CLSTN3	9.80284e-24	0.363377	0.491	0.201	1.77951e-19
SPTLC1	1.29808e-13	0.363225	0.661	0.476	2.3564e-09
KIAA1551	1.68031e-13	0.363113	0.701	0.468	3.05027e-09
PLOD1	2.90823e-12	0.362823	0.777	0.621	5.27931e-08
MCMBP	6.99921e-19	0.362506	0.679	0.409	1.27057e-14
RAD23B	4.19229e-13	0.362503	0.884	0.794	7.61026e-09
U2AF2	8.67373e-17	0.362187	0.777	0.569	1.57454e-12
IGF2	1.01643e-28	0.362105	0.397	0.121	1.84512e-24
CYP2S1	7.15912e-63	0.361834	0.353	0.035	1.2996e-58
CCNI	7.44312e-12	0.360254	0.906	0.898	1.35115e-07
LRRFIP1	9.70271e-08	0.36023	0.879	0.807	0.00176133
SEC24D	2.54567e-15	0.36007	0.58	0.337	4.62115e-11
KIAA0040	9.42732e-58	0.35958	0.353	0.041	1.71134e-53
CRYAB	3.02984e-72	0.359452	0.366	0.899	5.50007e-68
PDIA5	2.88623e-22	0.359359	0.496	0.215	5.23938e-18
DUT	2.28857e-07	0.359249	0.67	0.553	0.00415445
FBLIM1	5.24755e-11	0.358741	0.772	0.653	9.52587e-07
GIPC1	1.12427e-14	0.358464	0.781	0.603	2.0409e-10
ZNF117	2.71239e-13	0.358052	0.603	0.384	4.9238e-09
RAI14	8.02031e-14	0.357829	0.75	0.501	1.45593e-09
CLDN15	2.0803e-31	0.357571	0.353	0.085	3.77636e-27
FRMD4A	2.20531e-17	0.357531	0.415	0.181	4.00329e-13
RPS9	5.94278e-16	0.357469	0.991	0.965	1.07879e-11
LINC01011	3.19959e-15	0.357018	0.536	0.294	5.80822e-11
EWSR1	2.10815e-15	0.35671	0.862	0.735	3.82692e-11
MAL2	6.86591e-58	0.355735	0.29	0.023	1.24637e-53
DHX15	1.88625e-12	0.355613	0.857	0.746	3.42412e-08
GNPDA1	1.8597e-11	0.355581	0.71	0.554	3.37591e-07
TBL1X	2.73652e-10	0.355336	0.562	0.388	4.96761e-06
RPS19	6.85899e-09	0.354765	0.991	0.98	0.000124511
UBA2	5.28723e-12	0.35474	0.799	0.696	9.59791e-08
TET3	9.47131e-14	0.354638	0.527	0.307	1.71933e-09
FOXO1	7.13484e-12	0.354524	0.442	0.236	1.29519e-07
HNRNPA1	9.42615e-17	0.354456	0.991	0.993	1.71113e-12
CSTB	4.13094e-09	0.354396	0.839	0.765	7.4989e-05
TMEM54	4.97096e-46	0.354374	0.384	0.069	9.02378e-42
ALG3	2.83412e-14	0.3543	0.621	0.41	5.14477e-10
B3GNT5	7.50061e-32	0.353278	0.424	0.119	1.36159e-27
SPPL3	5.3786e-11	0.352885	0.705	0.542	9.76377e-07
EDN3	2.51221e-35	0.352859	0.223	0.027	4.56041e-31
NRAS	3.86432e-15	0.352821	0.768	0.56	7.0149e-11
SEP15	1.79208e-16	0.352774	0.848	0.684	3.25317e-12
TRIP6	4.79331e-16	0.352518	0.772	0.522	8.7013e-12
GYPC	6.10334e-13	0.351898	0.603	0.385	1.10794e-08
CDCA4	1.55027e-23	0.351645	0.478	0.192	2.8142e-19
IL4R	6.58173e-29	0.35145	0.308	0.072	1.19478e-24
RNF13	9.6434e-16	0.351344	0.522	0.284	1.75057e-11
RPLP2	1.55684e-13	0.34988	0.987	0.99	2.82613e-09
CALM2	1.3601e-06	0.349772	0.969	0.961	0.0246899
HNRNPF	9.34846e-16	0.34935	0.83	0.657	1.69703e-11
ABRACL	6.37094e-25	0.349346	0.562	0.242	1.15652e-20
AKTIP	1.86643e-14	0.348915	0.491	0.269	3.38813e-10
STON2	9.21363e-40	0.34866	0.344	0.066	1.67255e-35
NOTCH1	1.77625e-17	0.348554	0.384	0.154	3.22443e-13
NR3C1	2.43976e-10	0.348015	0.652	0.467	4.4289e-06
DSG2	4.88116e-08	0.347802	0.768	0.678	0.000886078
C19orf43	1.81318e-11	0.347275	0.83	0.753	3.29146e-07
PDE3A	5.42493e-09	0.347219	0.571	0.397	9.84788e-05
SRPK1	6.51135e-15	0.346692	0.594	0.368	1.18201e-10
FNDC3B	1.43333e-08	0.346666	0.79	0.689	0.000260192
HSD17B14	1.20012e-15	0.346604	0.558	0.328	2.17858e-11
S100A13	4.4562e-12	0.346551	0.558	0.361	8.08934e-08
ELF3	1.51636e-42	0.346261	0.312	0.046	2.75265e-38
GCLM	3.59541e-22	0.346254	0.464	0.197	6.52674e-18
CYP26B1	4.69678e-63	0.346103	0.228	0.007	8.52606e-59
RBMS1	2.09384e-09	0.345897	0.933	0.913	3.80095e-05
ENOPH1	2.73572e-16	0.345364	0.589	0.342	4.96616e-12
PLEC	5.42831e-12	0.345144	0.893	0.783	9.85401e-08
AP3S1	9.67782e-15	0.344719	0.714	0.535	1.75681e-10
GLTSCR2	4.67205e-11	0.344682	0.741	0.639	8.48116e-07
IFITM3	6.30482e-12	0.344616	0.982	0.955	1.14451e-07
NENF	5.0541e-23	0.344275	0.571	0.263	9.17471e-19
ARF3	3.58187e-10	0.344116	0.808	0.71	6.50216e-06
TRIM26	6.30149e-14	0.34388	0.504	0.284	1.14391e-09
TMEM106C	1.47265e-11	0.343297	0.683	0.5	2.67331e-07
ZNF737	4.28213e-17	0.342623	0.536	0.285	7.77336e-13
RPL38	5.95587e-15	0.342593	1	0.993	1.08117e-10
C1QTNF6	1.37612e-17	0.342482	0.469	0.225	2.49807e-13
IGSF8	2.24025e-24	0.342112	0.54	0.237	4.06672e-20
SLC35D2	5.4384e-10	0.342081	0.598	0.427	9.87233e-06
CUL7	5.47308e-12	0.341985	0.688	0.508	9.93528e-08
UXT	8.16513e-13	0.341745	0.714	0.496	1.48222e-08
SULF2	1.86255e-18	0.341694	0.442	0.181	3.38108e-14
DOPEY2	2.43586e-34	0.339855	0.42	0.113	4.42181e-30
CNOT9	7.60887e-18	0.33972	0.518	0.248	1.38124e-13
DCAF6	1.04784e-06	0.339567	0.71	0.618	0.0190214
KCTD1	1.4017e-17	0.339075	0.442	0.203	2.5445e-13
SETD3	6.10851e-10	0.33868	0.741	0.595	1.10888e-05
NABP1	4.91541e-31	0.33833	0.299	0.063	8.92294e-27
ZBTB1	3.21134e-13	0.337846	0.634	0.435	5.82954e-09
ATP6V1F	1.75303e-12	0.336232	0.897	0.799	3.18228e-08
SRP9	4.81723e-17	0.33622	0.964	0.959	8.74472e-13
HPN	7.20947e-46	0.33598	0.299	0.038	1.30873e-41
TAF10	3.42063e-11	0.335721	0.862	0.739	6.20948e-07
MORF4L2	1.8869e-11	0.335331	0.951	0.889	3.42529e-07
PRKX	2.25807e-14	0.334998	0.411	0.195	4.09907e-10
SPIN1	1.49549e-09	0.334842	0.848	0.791	2.71476e-05
RPS15	2.60793e-12	0.334802	0.996	0.988	4.73418e-08
TK1	9.15279e-21	0.334775	0.214	0.047	1.66151e-16
PARD6B	1.52686e-12	0.33462	0.656	0.431	2.77172e-08
TCOF1	6.5722e-11	0.334511	0.562	0.383	1.19305e-06
GANAB	1.08548e-11	0.334194	0.741	0.583	1.97047e-07
PTGES3	1.45299e-13	0.334134	0.938	0.898	2.63761e-09
KRTCAP2	1.67281e-12	0.334133	0.906	0.854	3.03666e-08
INSIG1	7.92227e-09	0.334006	0.464	0.286	0.000143813
INAFM1	2.06245e-21	0.333586	0.46	0.193	3.74397e-17
LBR	7.91675e-13	0.333464	0.616	0.408	1.43713e-08
SLC4A8	2.22338e-50	0.333416	0.366	0.055	4.0361e-46
PUDP	4.5061e-20	0.33303	0.536	0.257	8.17991e-16
RER1	2.24167e-16	0.331985	0.571	0.321	4.06931e-12
LAMC1	1.06421e-15	0.331955	0.946	0.925	1.93185e-11
PGRMC2	2.86436e-08	0.331867	0.808	0.74	0.000519967
MAP3K1	9.94517e-15	0.331542	0.701	0.427	1.80535e-10
SRSF2	2.64588e-08	0.331472	0.906	0.901	0.000480307
SEC31A	3.67358e-13	0.331358	0.915	0.877	6.66866e-09
C7orf50	1.77958e-09	0.33123	0.732	0.584	3.23047e-05
SNTB1	2.21167e-42	0.331062	0.259	0.029	4.01485e-38
ZC3H11A	8.5357e-11	0.331053	0.875	0.783	1.54949e-06
BANF1	1.84551e-12	0.331034	0.897	0.834	3.35015e-08
TRAF4	3.36226e-21	0.330898	0.522	0.239	6.10351e-17
ERP29	5.43161e-13	0.330166	0.763	0.564	9.86e-09
NFYA	3.59781e-17	0.330147	0.482	0.227	6.5311e-13
RPL31	2.03319e-13	0.329914	0.987	0.992	3.69085e-09
TUBB6	7.99217e-09	0.329726	0.67	0.499	0.000145082
GNAI2	5.61979e-07	0.32952	0.871	0.815	0.0102016
SFT2D1	1.3839e-16	0.328913	0.567	0.319	2.51219e-12
EIF4E2	1.22167e-12	0.328867	0.732	0.525	2.2177e-08
ATP13A2	1.34428e-14	0.328863	0.621	0.392	2.44028e-10
ADAR	2.11115e-10	0.328856	0.804	0.721	3.83236e-06
GDF6	3.25078e-29	0.328469	0.455	0.139	5.90115e-25
TGIF1	1.10121e-13	0.328367	0.5	0.28	1.99902e-09
RBM39	7.86833e-14	0.328026	0.906	0.881	1.42834e-09
IP6K2	1.83608e-10	0.327951	0.754	0.625	3.33303e-06
ACTR2	2.97014e-08	0.32795	0.826	0.777	0.000539169
PDIA4	4.41672e-11	0.327816	0.629	0.442	8.01768e-07
GABARAP	3.27202e-15	0.327761	0.987	0.987	5.93971e-11
GSN	8.47514e-13	0.327674	0.812	0.672	1.53849e-08
PLK2	5.80906e-21	0.32731	0.433	0.164	1.05452e-16
PTGS2	9.74655e-32	0.327187	0.138	0.008	1.76929e-27
LOC100420587	3.4627e-22	0.326888	0.406	0.15	6.28583e-18
CASP2	4.53275e-12	0.326553	0.491	0.294	8.2283e-08
ZNF626	5.9002e-12	0.326516	0.531	0.335	1.07106e-07
ARF1	5.84946e-17	0.326509	0.969	0.961	1.06185e-12
MMP24-AS1	7.53191e-20	0.325933	0.513	0.233	1.36727e-15
ELOVL1	2.73782e-16	0.325669	0.513	0.271	4.96996e-12
TCF7L2	1.43718e-10	0.325256	0.812	0.697	2.60891e-06
CEP170B	1.29924e-28	0.325167	0.424	0.134	2.35851e-24
PRKCDBP	8.10468e-09	0.325144	0.504	0.342	0.000147124
PACSIN2	4.51355e-14	0.324982	0.589	0.363	8.19345e-10
KDSR	5.59949e-10	0.32454	0.67	0.514	1.01647e-05
CNN2	9.66405e-10	0.32444	0.911	0.881	1.75432e-05
ARHGEF35	5.04715e-57	0.324331	0.366	0.046	9.16209e-53
ATN1	6.81001e-12	0.324255	0.924	0.873	1.23622e-07
SMAGP	2.25315e-58	0.324116	0.326	0.033	4.09015e-54
SKP2	3.50757e-13	0.323962	0.594	0.384	6.36729e-09
CXCL16	4.76102e-54	0.323937	0.268	0.021	8.64267e-50
ISCU	2.45009e-07	0.323925	0.826	0.803	0.00444765
NT5DC3	8.05361e-38	0.323703	0.375	0.083	1.46197e-33
SMIM14	1.6511e-10	0.323191	0.612	0.445	2.99725e-06
CHRAC1	3.0165e-11	0.322972	0.567	0.381	5.47586e-07
PCGF3	7.51439e-12	0.322789	0.719	0.519	1.36409e-07
TRA2B	1.15341e-08	0.322764	0.812	0.771	0.000209379
MGME1	3.97436e-15	0.322047	0.545	0.304	7.21466e-11
DANT2	1.24868e-14	0.321992	0.496	0.269	2.26672e-10
MIR22HG	7.02028e-14	0.321464	0.442	0.223	1.27439e-09
CARHSP1	3.05361e-14	0.321408	0.674	0.445	5.54322e-10
RPL22	9.39229e-16	0.321394	0.973	0.983	1.70498e-11
AHR	3.90239e-36	0.320802	0.344	0.071	7.08402e-32
KIAA0101	1.11687e-16	0.320607	0.308	0.109	2.02746e-12
SNX24	7.25152e-12	0.320571	0.621	0.43	1.31637e-07
KLHL42	1.14848e-11	0.320498	0.674	0.471	2.08483e-07
HPCAL1	3.61331e-23	0.320485	0.353	0.11	6.55924e-19
QARS	1.13268e-11	0.320461	0.862	0.808	2.05616e-07
PGRMC1	8.90929e-10	0.320089	0.871	0.797	1.6173e-05
IRS1	1.73665e-09	0.319757	0.402	0.239	3.15255e-05
HOOK3	1.82753e-10	0.319559	0.768	0.643	3.31751e-06
EIF2S3	8.84067e-12	0.318896	0.906	0.859	1.60485e-07
FAM46B	4.80228e-44	0.318611	0.326	0.049	8.71759e-40
MRPL14	3.54527e-11	0.318392	0.741	0.583	6.43572e-07
CLINT1	1.32702e-10	0.31818	0.808	0.677	2.40894e-06
SNHG7	1.37483e-11	0.317701	0.812	0.647	2.49572e-07
EIF4A3	4.99453e-09	0.31744	0.696	0.573	9.06656e-05
SERTAD4	2.72656e-55	0.317258	0.371	0.049	4.94953e-51
SNAP23	6.06952e-14	0.316971	0.549	0.317	1.1018e-09
SHISA5	1.20572e-08	0.316557	0.786	0.697	0.000218875
SLC30A7	9.27539e-11	0.316461	0.598	0.406	1.68376e-06
MAPK13	4.30581e-25	0.316293	0.371	0.117	7.81634e-21
MED28	6.05017e-13	0.316132	0.701	0.484	1.09829e-08
MARCKS	3.88412e-17	0.315777	0.906	0.674	7.05085e-13
LRP10	1.85471e-09	0.315776	0.737	0.577	3.36686e-05
ARHGEF18	6.10302e-20	0.315585	0.513	0.245	1.10788e-15
WIPF2	9.19617e-10	0.315561	0.71	0.543	1.66938e-05
RDH11	8.8146e-09	0.315319	0.696	0.56	0.000160012
TMEM158	2.1633e-38	0.315065	0.241	0.029	3.92704e-34
SNRPE	3.3256e-11	0.314721	0.821	0.677	6.03696e-07
SSR1	4.73704e-10	0.314647	0.817	0.703	8.59914e-06
SMYD2	1.92176e-09	0.314503	0.603	0.435	3.48857e-05
SCRN1	3.4492e-10	0.314344	0.866	0.761	6.26133e-06
HLA-C	1.93776e-28	0.313991	0.393	0.113	3.51762e-24
RASGRF2	3.50405e-54	0.313917	0.232	0.013	6.3609e-50
ARHGAP21	2.58047e-08	0.313877	0.683	0.583	0.000468432
BNC1	3.75096e-19	0.313728	0.522	0.229	6.80912e-15
ATP6V1B2	6.04212e-10	0.313657	0.679	0.53	1.09683e-05
CENPK	4.51842e-17	0.313262	0.241	0.072	8.2023e-13
C4orf26	5.70644e-54	0.313258	0.219	0.01	1.03589e-49
KLF5	1.29619e-37	0.313072	0.321	0.058	2.35296e-33
MFSD14A	2.03775e-18	0.312878	0.603	0.311	3.69912e-14
DOCK1	4.92377e-13	0.312591	0.513	0.309	8.93812e-09
GOLT1B	4.21753e-12	0.312224	0.607	0.399	7.65608e-08
GORASP2	1.83223e-09	0.312206	0.835	0.729	3.32606e-05
RASEF	1.8831e-82	0.312205	0.29	0.007	3.41839e-78
TRIL	1.71232e-19	0.312145	0.379	0.135	3.10838e-15
ATP6V1A	1.86585e-10	0.311802	0.781	0.643	3.38709e-06
ZDHHC20	7.44785e-15	0.311355	0.629	0.395	1.35201e-10
CHST14	7.13019e-13	0.311218	0.603	0.381	1.29434e-08
VKORC1L1	3.21681e-14	0.311213	0.58	0.356	5.83948e-10
CACNG4	1.36241e-89	0.3111	0.321	0.009	2.47319e-85
HN1L	8.66191e-11	0.311021	0.638	0.461	1.5724e-06
NFAT5	1.87601e-08	0.310741	0.853	0.749	0.000340552
MGAT1	5.39713e-12	0.31053	0.558	0.355	9.7974e-08
FNBP1L	1.29452e-11	0.310514	0.647	0.439	2.34995e-07
C5	2.2215e-33	0.310467	0.281	0.051	4.03269e-29
NCALD	5.07799e-09	0.309566	0.393	0.229	9.21808e-05
TMEM51	9.02941e-17	0.309426	0.42	0.185	1.63911e-12
LRRN2	1.34659e-22	0.309408	0.335	0.101	2.44447e-18
AADAT	9.64831e-15	0.309141	0.415	0.199	1.75146e-10
LAMTOR3	3.48508e-11	0.309121	0.692	0.542	6.32647e-07
BTG3	7.76479e-07	0.308952	0.679	0.561	0.0140954
AIF1L	1.83018e-23	0.308828	0.357	0.113	3.32232e-19
AP2A2	6.12419e-09	0.308814	0.723	0.627	0.000111172
NLGN2	7.15308e-12	0.308644	0.723	0.545	1.2985e-07
TALDO1	1.77461e-09	0.308406	0.647	0.489	3.22146e-05
RAB10	2.34576e-10	0.307856	0.839	0.755	4.25825e-06
BRIX1	2.37924e-11	0.307311	0.513	0.332	4.31904e-07
SGSM2	9.68196e-10	0.307309	0.674	0.508	1.75757e-05
MAP7	2.96283e-59	0.306611	0.348	0.039	5.37842e-55
PDE7A	3.40131e-20	0.306476	0.518	0.242	6.17441e-16
STAP2	7.77007e-26	0.306312	0.371	0.11	1.4105e-21
YWHAE	9.43942e-18	0.306225	1	0.995	1.71354e-13
RTCB	8.6593e-12	0.3055	0.75	0.498	1.57192e-07
DYNLL1	1.66341e-09	0.305021	0.973	0.967	3.01959e-05
TFAP2C	3.9922e-99	0.305012	0.317	0.004	7.24704e-95
RNASET2	5.16449e-13	0.304637	0.527	0.319	9.37511e-09
ESYT1	1.38154e-16	0.304618	0.513	0.262	2.50791e-12
N4BP1	5.14426e-11	0.304559	0.67	0.493	9.33838e-07
DEK	8.83394e-07	0.303975	0.848	0.772	0.0160362
CCT5	2.8534e-08	0.303946	0.835	0.762	0.000517979
MCM5	1.15336e-06	0.303745	0.312	0.191	0.020937
SNRPF	1.66399e-14	0.303655	0.692	0.459	3.02064e-10
PCYOX1	3.5761e-11	0.30293	0.853	0.736	6.49169e-07
MICALL1	9.40884e-18	0.302844	0.424	0.187	1.70799e-13
RHOG	2.3241e-14	0.302426	0.625	0.384	4.21894e-10
AP1S3	9.09552e-17	0.302364	0.344	0.141	1.65111e-12
COPE	1.14922e-13	0.302028	0.879	0.757	2.08618e-09
HLA-B	5.10132e-12	0.301881	0.371	0.184	9.26042e-08
MTCL1	9.86038e-27	0.301774	0.33	0.088	1.78995e-22
TMEM214	1.75734e-10	0.301352	0.625	0.443	3.1901e-06
ULK1	6.17791e-10	0.301213	0.692	0.513	1.12148e-05
MAP3K2	8.72957e-11	0.301042	0.737	0.554	1.58468e-06
KDF1	1.35672e-82	0.300409	0.29	0.007	2.46286e-78
KIAA1161	7.86502e-21	0.300397	0.42	0.165	1.42774e-16
EIF4G2	1.54943e-15	0.299814	1	0.997	2.81268e-11
IMPAD1	3.28671e-09	0.299585	0.853	0.77	5.96637e-05
EXPH5	1.07235e-38	0.299401	0.339	0.063	1.94664e-34
RNASEH2A	9.24348e-13	0.299122	0.393	0.199	1.67797e-08
PRSS12	4.89989e-42	0.299004	0.268	0.033	8.89478e-38
CISD2	2.02421e-09	0.29832	0.71	0.589	3.67455e-05
DIAPH2	6.90092e-18	0.298068	0.362	0.143	1.25272e-13
MOB3A	6.4918e-11	0.297775	0.509	0.327	1.17846e-06
RCC2	3.97846e-14	0.297045	0.763	0.552	7.2221e-10
KRAS	1.38781e-08	0.297014	0.759	0.598	0.00025193
DNAJB1	1.87145e-09	0.296758	0.701	0.541	3.39724e-05
CITED2	2.70033e-07	0.296457	0.594	0.449	0.0049019
MYL12A	2.37338e-11	0.296432	0.946	0.855	4.3084e-07
CD164	1.9073e-13	0.296424	0.938	0.895	3.46232e-09
ZNF107	4.81739e-27	0.29636	0.375	0.111	8.745e-23
PNPLA6	2.97031e-21	0.296312	0.451	0.184	5.392e-17
DDX23	1.71168e-13	0.295855	0.629	0.401	3.10721e-09
TMBIM4	8.75177e-10	0.295826	0.826	0.702	1.58871e-05
ARAP2	1.24999e-38	0.295672	0.335	0.061	2.2691e-34
TMPO	2.32958e-10	0.29525	0.732	0.56	4.22889e-06
ANLN	1.02685e-20	0.294695	0.442	0.174	1.86404e-16
TOR1AIP2	4.0986e-08	0.294592	0.728	0.657	0.000744019
PAQR8	1.97312e-17	0.294252	0.353	0.14	3.58181e-13
OS9	5.6056e-09	0.294164	0.737	0.606	0.000101758
TMEM179B	1.89667e-07	0.294084	0.634	0.489	0.00344303
SCAMP2	5.7736e-12	0.29402	0.656	0.458	1.04808e-07
NQO1	4.67111e-12	0.293333	0.348	0.165	8.47946e-08
YES1	8.65746e-11	0.293271	0.643	0.46	1.57159e-06
C11orf84	3.90713e-14	0.293195	0.554	0.325	7.09262e-10
ANKRD63	1.32147e-15	0.292747	0.259	0.085	2.39887e-11
KCNE4	1.76728e-23	0.292274	0.25	0.056	3.20813e-19
SNHG3	3.62436e-08	0.291567	0.527	0.37	0.00065793
ZFHX3	2.85767e-08	0.290796	0.844	0.752	0.000518753
SNX4	6.06372e-09	0.290674	0.607	0.456	0.000110075
SLC25A32	6.54734e-13	0.290243	0.487	0.272	1.18854e-08
ATP6V1G1	1.03923e-10	0.289948	0.866	0.815	1.88651e-06
PRSS16	7.60129e-41	0.28992	0.317	0.051	1.37986e-36
SLC37A3	1.50529e-10	0.289837	0.67	0.47	2.73255e-06
FEN1	9.10506e-12	0.289831	0.339	0.163	1.65284e-07
PLAC8	4.39889e-63	0.289734	0.25	0.011	7.9853e-59
NUS1	7.68613e-08	0.289648	0.683	0.541	0.00139526
STIM1	8.32582e-14	0.289557	0.504	0.281	1.51139e-09
PLD5	4.07138e-57	0.289354	0.228	0.01	7.39077e-53
IKZF2	2.84692e-21	0.288889	0.335	0.109	5.16801e-17
CYB5R2	3.14857e-22	0.288819	0.366	0.119	5.7156e-18
PXDC1	2.59544e-17	0.288615	0.504	0.236	4.71149e-13
SMS	3.37875e-08	0.288597	0.866	0.774	0.000613345
PTGFRN	5.58481e-10	0.288449	0.594	0.427	1.01381e-05
ANKH	1.03588e-10	0.288144	0.509	0.31	1.88044e-06
CDC42SE2	2.80224e-13	0.287474	0.464	0.255	5.0869e-09
ANKRD10	3.98116e-08	0.287131	0.795	0.654	0.000722699
KDM5C	1.11964e-06	0.286886	0.625	0.519	0.0203248
EPN3	3.04655e-57	0.286773	0.277	0.021	5.5304e-53
HNRNPR	1.55575e-09	0.286611	0.879	0.821	2.82415e-05
ROBO1	2.96246e-12	0.286485	0.58	0.347	5.37776e-08
PIGC	1.7229e-16	0.286447	0.509	0.262	3.12758e-12
ARL8B	6.65774e-08	0.286244	0.692	0.547	0.00120858
CENPF	1.55062e-10	0.286119	0.259	0.109	2.81484e-06
RPN1	9.95314e-10	0.285383	0.679	0.52	1.80679e-05
ABCG2	2.57888e-32	0.285285	0.259	0.043	4.68143e-28
TBCB	3.47881e-09	0.285138	0.768	0.627	6.31508e-05
SNRPG	8.21087e-09	0.285049	0.719	0.585	0.000149052
PDCD2	3.68802e-10	0.28496	0.661	0.483	6.69485e-06
RAP1B	5.35999e-10	0.284575	0.799	0.64	9.72998e-06
PLD3	1.30024e-07	0.284534	0.924	0.902	0.00236033
CD151	1.56211e-08	0.284463	0.875	0.787	0.00028357
HDAC2	9.79116e-10	0.284099	0.92	0.876	1.77739e-05
UNC50	3.18464e-12	0.283797	0.567	0.359	5.78107e-08
ACP1	1.78718e-09	0.283712	0.835	0.749	3.24427e-05
MFSD14B	2.18507e-12	0.283392	0.482	0.267	3.96655e-08
TMEM55A	5.83167e-08	0.283279	0.5	0.357	0.00105862
PCBP2	4.32744e-12	0.282957	0.982	0.975	7.8556e-08
CD59	1.9386e-08	0.282702	0.871	0.811	0.000351915
MCUR1	6.4921e-09	0.282702	0.576	0.381	0.000117851
SYPL1	1.69233e-10	0.28265	0.696	0.531	3.07209e-06
SNHG12	2.01477e-12	0.28251	0.42	0.221	3.65741e-08
SHROOM2	4.87584e-11	0.282486	0.357	0.186	8.85111e-07
DDX21	1.16765e-06	0.282276	0.763	0.671	0.0211964
SET	3.01332e-11	0.28223	0.973	0.973	5.47008e-07
CXADR	3.46674e-08	0.28217	0.826	0.736	0.000629318
STRN4	3.53762e-09	0.282113	0.826	0.759	6.42184e-05
DBNDD1	2.8533e-14	0.281975	0.429	0.212	5.1796e-10
ACER3	4.14156e-12	0.281948	0.509	0.307	7.51818e-08
EIF3F	1.75012e-10	0.28176	0.951	0.907	3.17699e-06
MB21D2	1.07381e-17	0.28165	0.393	0.163	1.94929e-13
NDRG1	2.63068e-15	0.281583	0.33	0.132	4.77547e-11
DUSP4	7.46004e-36	0.281551	0.241	0.032	1.35422e-31
KYAT3	3.03696e-13	0.281507	0.504	0.271	5.51299e-09
LOC154761	3.2664e-53	0.281498	0.295	0.029	5.92949e-49
PPARG	1.70304e-63	0.281097	0.259	0.012	3.09153e-59
C5orf46	6.25086e-70	0.280148	0.232	0.004	1.13472e-65
GPS2	7.15259e-08	0.279947	0.786	0.665	0.00129841
SLC2A4RG	2.00355e-13	0.279623	0.634	0.409	3.63704e-09
LSR	1.1915e-27	0.27947	0.388	0.115	2.16293e-23
PRDM5	5.70741e-25	0.278663	0.33	0.094	1.03607e-20
NOX4	1.24246e-24	0.278536	0.25	0.055	2.25544e-20
TMOD3	7.626e-16	0.27788	0.478	0.24	1.38435e-11
PAICS	3.08306e-07	0.277675	0.719	0.635	0.00559668
MRPL19	3.34096e-09	0.277408	0.629	0.469	6.06485e-05
JDP2	4.43474e-30	0.277134	0.366	0.095	8.05037e-26
MAPK6	3.35233e-09	0.277122	0.683	0.552	6.08548e-05
SYT7	1.86942e-24	0.276724	0.254	0.057	3.39356e-20
UPP1	1.55944e-17	0.276431	0.33	0.123	2.83086e-13
RGL3	1.51632e-40	0.276197	0.268	0.034	2.75257e-36
KLF3	2.45143e-08	0.276145	0.576	0.403	0.000445008
SEC11A	1.0106e-11	0.276102	0.92	0.834	1.83454e-07
GAPDH	3.58601e-09	0.275937	1	1	6.50968e-05
YWHAB	3.4475e-10	0.275703	0.973	0.965	6.25825e-06
RANBP17	2.48819e-27	0.275337	0.393	0.118	4.5168e-23
FERMT1	7.51174e-09	0.275128	0.473	0.299	0.000136361
RPIA	4.98055e-22	0.274775	0.393	0.143	9.04119e-18
ITGB4	3.59997e-47	0.274703	0.246	0.021	6.53502e-43
PHLDA3	1.74046e-12	0.274677	0.54	0.322	3.15945e-08
TRIOBP	4.54908e-07	0.274602	0.754	0.663	0.00825795
TFE3	1.40399e-09	0.27452	0.589	0.413	2.54867e-05
PSMA7	5.98101e-10	0.274335	0.92	0.886	1.08573e-05
RPL4	9.69659e-16	0.274043	1	0.999	1.76022e-11
OSTC	6.26805e-12	0.273411	0.902	0.827	1.13784e-07
ATF1	1.30456e-11	0.273241	0.522	0.317	2.36816e-07
RELL1	5.64628e-16	0.273096	0.415	0.187	1.02497e-11
RAC1	2.12614e-11	0.273032	0.951	0.961	3.85957e-07
TBX15	2.11098e-71	0.27256	0.232	0.003	3.83206e-67
MCOLN3	5.01165e-51	0.272484	0.241	0.017	9.09765e-47
TNFAIP3	1.20534e-19	0.272483	0.201	0.044	2.18806e-15
GOLPH3	5.43231e-08	0.272285	0.723	0.586	0.000986127
KHSRP	7.03076e-09	0.271939	0.857	0.795	0.000127629
FAM91A1	1.42464e-13	0.271811	0.513	0.288	2.58615e-09
PDCD6IP	3.11592e-09	0.271501	0.812	0.703	5.65632e-05
CHMP5	8.70882e-08	0.271411	0.772	0.702	0.00158091
SYTL1	1.12037e-16	0.271049	0.353	0.141	2.03381e-12
PTPN23	9.59939e-09	0.270954	0.567	0.415	0.000174258
AIM2	1.99049e-62	0.270352	0.196	0.002	3.61334e-58
CPNE8	2.08802e-20	0.270317	0.344	0.116	3.79037e-16
EHD2	4.4597e-17	0.269765	0.545	0.254	8.09569e-13
ZNF22	1.69867e-07	0.269749	0.719	0.581	0.00308359
S100A4	2.11862e-11	0.269605	0.246	0.096	3.84593e-07
NELFCD	1.52839e-12	0.269581	0.665	0.425	2.77448e-08
IFI16	9.73156e-14	0.269439	0.384	0.179	1.76657e-09
PGLS	4.09217e-10	0.269186	0.661	0.494	7.42852e-06
ECEL1P2	1.21884e-71	0.269127	0.223	0.002	2.21256e-67
STX7	1.12056e-08	0.268912	0.652	0.481	0.000203414
SEMA4C	1.20237e-09	0.268839	0.482	0.299	2.18266e-05
METTL7A	1.56043e-09	0.268753	0.335	0.175	2.83265e-05
RRAGC	1.99778e-09	0.268718	0.603	0.418	3.62657e-05
NFIL3	5.56137e-12	0.268692	0.509	0.291	1.00956e-07
ANKRD28	4.44831e-14	0.268493	0.5	0.273	8.07501e-10
RSU1	1.40614e-07	0.268416	0.705	0.568	0.00255256
SDC1	1.42446e-28	0.268334	0.268	0.052	2.58583e-24
PHGDH	9.07957e-12	0.268162	0.594	0.363	1.64821e-07
BORCS7	1.47366e-10	0.26814	0.531	0.329	2.67513e-06
RAB11FIP4	1.07094e-13	0.267462	0.344	0.155	1.94408e-09
FAM126A	2.45124e-14	0.267212	0.473	0.246	4.44974e-10
NEU1	1.19823e-13	0.266924	0.487	0.262	2.17515e-09
SAR1A	6.71639e-09	0.266873	0.786	0.65	0.000121923
RIC1	2.95703e-12	0.26633	0.406	0.204	5.3679e-08
CPNE1	2.9465e-08	0.266291	0.768	0.688	0.000534878
CANX	2.66898e-10	0.265927	0.96	0.943	4.84501e-06
DNAJC9	9.25919e-08	0.265725	0.554	0.399	0.00168082
PLSCR1	5.00496e-20	0.265585	0.446	0.183	9.08551e-16
ZNRF2	5.78298e-21	0.265383	0.411	0.157	1.04979e-16
ERP27	1.82626e-74	0.264916	0.237	0.003	3.31522e-70
UBE2V2	4.79206e-07	0.26488	0.714	0.624	0.00869903
CKAP4	6.35387e-10	0.264716	0.915	0.878	1.15342e-05
LOC102723471	6.49417e-70	0.264705	0.223	0.003	1.17889e-65
ARL6IP6	2.81876e-19	0.264389	0.384	0.147	5.1169e-15
KIT	4.65969e-27	0.264383	0.214	0.035	8.45873e-23
ARL6IP1	1.13809e-06	0.264232	0.67	0.56	0.0206598
GOLGA2	1.75935e-08	0.26414	0.67	0.538	0.000319375
COPA	7.95595e-08	0.264124	0.924	0.881	0.00144424
CARM1	2.73799e-06	0.26412	0.625	0.519	0.0497027
TECR	2.68689e-08	0.264086	0.719	0.579	0.000487752
WASF2	1.28453e-07	0.264066	0.884	0.816	0.0023318
GAS7	1.55226e-15	0.263647	0.348	0.141	2.81781e-11
FBL	2.33041e-09	0.263257	0.808	0.678	4.2304e-05
DSE	5.80885e-12	0.263129	0.415	0.22	1.05448e-07
MELK	3.14715e-21	0.262794	0.219	0.047	5.71303e-17
GYG2	4.89301e-07	0.262432	0.518	0.366	0.00888229
TMEM184B	4.00842e-07	0.262351	0.616	0.483	0.00727648
PRRT4	1.7872e-41	0.261188	0.304	0.045	3.2443e-37
PARP8	5.8151e-12	0.260928	0.429	0.227	1.05561e-07
SLC25A24	2.31149e-10	0.2609	0.549	0.369	4.19604e-06
PSMD11	1.52641e-06	0.260343	0.804	0.727	0.027709
SRSF1	1.31224e-06	0.260227	0.862	0.825	0.023821
DHX9	3.71368e-08	0.260202	0.857	0.795	0.000674144
CNIH1	6.01043e-09	0.25987	0.714	0.506	0.000109107
DAPK1	2.52432e-17	0.259555	0.455	0.205	4.5824e-13
TMBIM6	4.55605e-11	0.259377	0.982	0.972	8.27059e-07
ARFIP2	2.19428e-07	0.259109	0.554	0.409	0.00398328
STK10	3.86505e-14	0.258747	0.384	0.18	7.01623e-10
HS6ST1	4.01428e-23	0.258488	0.379	0.126	7.28712e-19
NUP153	3.3373e-11	0.258117	0.58	0.378	6.0582e-07
CTTNBP2	9.69029e-08	0.258099	0.438	0.277	0.00175908
LURAP1L	6.31534e-20	0.257956	0.219	0.051	1.14642e-15
SLC36A4	7.91092e-07	0.257004	0.567	0.425	0.0143607
CDC7	8.3694e-25	0.256677	0.33	0.095	1.5193e-20
NKX2-3	6.15648e-70	0.256507	0.228	0.003	1.11759e-65
SLC17A5	1.78313e-12	0.256472	0.371	0.18	3.23691e-08
CACNB3	3.59219e-09	0.256221	0.522	0.335	6.5209e-05
FZD8	2.10374e-06	0.255991	0.482	0.333	0.0381891
SERINC2	8.30031e-29	0.255263	0.357	0.093	1.50676e-24
HNRNPH3	3.41815e-07	0.255212	0.871	0.86	0.00620497
MED14	1.73126e-09	0.255179	0.491	0.311	3.14275e-05
TMEM230	8.05779e-08	0.254911	0.808	0.732	0.00146273
MAFB	1.08157e-14	0.254644	0.17	0.042	1.96337e-10
NUP205	6.09127e-12	0.254611	0.527	0.317	1.10575e-07
SEMA3F	7.94248e-38	0.254418	0.317	0.055	1.4418e-33
CLDND1	2.83319e-08	0.25441	0.839	0.708	0.00051431
DVL3	1.78114e-09	0.254381	0.866	0.824	3.23331e-05
MPV17	2.36681e-08	0.254377	0.746	0.593	0.000429647
STARD10	1.17184e-08	0.254202	0.406	0.251	0.000212725
GPR161	4.74513e-11	0.254097	0.482	0.288	8.61384e-07
FAM101B	2.17559e-24	0.253785	0.263	0.061	3.94934e-20
SLC4A4	5.37128e-09	0.253213	0.33	0.171	9.75049e-05
PRR15	2.85799e-60	0.253191	0.228	0.008	5.1881e-56
ZMAT2	8.59591e-09	0.253171	0.612	0.459	0.000156042
TM9SF1	2.80479e-09	0.253141	0.607	0.437	5.09154e-05
SHB	1.13084e-11	0.252768	0.482	0.273	2.05282e-07
ALG12	3.52706e-12	0.252487	0.433	0.231	6.40267e-08
C5orf38	8.89798e-50	0.252419	0.219	0.013	1.61525e-45
TMEM147	1.45296e-08	0.25211	0.75	0.653	0.000263757
SHANK2	8.42137e-70	0.251957	0.241	0.005	1.52873e-65
ADSS	4.22947e-07	0.251651	0.518	0.36	0.00767775
FSTL3	1.5591e-13	0.251464	0.46	0.235	2.83023e-09
LIN7C	2.70464e-09	0.251374	0.647	0.463	4.90973e-05
PHTF2	2.66675e-06	0.251344	0.705	0.59	0.0484096
TMEM189	6.98425e-13	0.251319	0.429	0.223	1.26785e-08
PRICKLE2	3.25636e-13	0.250955	0.429	0.213	5.91128e-09
SMIM15	1.16739e-08	0.25036	0.571	0.401	0.000211916
ARSD	5.2575e-11	0.250326	0.571	0.361	9.54394e-07
TMEM154	4.78634e-73	0.250246	0.241	0.004	8.68864e-69
NCKAP1	2.83065e-06	0.266913	0.924	0.869	0.0513848
HSPH1	2.97706e-06	0.277922	0.638	0.529	0.0540425
VCP	2.98713e-06	0.256257	0.897	0.905	0.0542253
ANP32E	3.14128e-06	0.275663	0.75	0.656	0.0570237
PXDN	3.56471e-06	0.28343	0.888	0.843	0.0647102
RDX	3.60834e-06	0.339019	0.893	0.886	0.0655022
TCEAL4	3.71857e-06	0.277755	0.812	0.726	0.0675032
RSPO3	3.95612e-06	0.261246	0.545	0.387	0.0718154
HADH	5.86001e-06	0.293936	0.67	0.576	0.106377
N4BP2	6.61858e-06	0.265914	0.643	0.526	0.120147
PPP2CB	7.15921e-06	0.282651	0.844	0.772	0.129961
SGPL1	7.71852e-06	0.270758	0.647	0.559	0.140114
SLN	8.1069e-06	0.837579	0.299	0.186	0.147165
DNAJC6	1.01374e-05	0.252977	0.701	0.607	0.184024
SQSTM1	1.07779e-05	0.436743	0.786	0.739	0.195651
ATP2B1	1.23221e-05	0.270554	0.754	0.639	0.223683
PPP1R18	1.32839e-05	0.25858	0.594	0.476	0.241142
ACTR3	1.805e-05	0.280307	0.786	0.726	0.327661
CUL5	1.937e-05	0.252057	0.661	0.539	0.351624
MCM7	2.80724e-05	0.338728	0.562	0.467	0.509598
ATF7IP	2.84829e-05	0.254158	0.817	0.759	0.51705
RALA	3.16158e-05	0.270671	0.585	0.488	0.573921
RHOBTB3	3.44121e-05	0.285488	0.955	0.953	0.624683
EFNA1	4.87168e-05	0.323322	0.589	0.469	0.884355
GYG1	5.6205e-05	0.414137	0.799	0.759	1
KDR	5.96661e-05	0.320267	0.076	0.195	1
RANBP1	6.99721e-05	0.252183	0.688	0.629	1
ALDH1A1	8.18107e-05	0.465317	0.036	0.132	1
BAMBI	0.000129057	0.271994	0.897	0.894	1
ALPK2	0.000140628	0.256403	0.79	0.715	1
CD24	0.000191286	0.25072	0.04	0.133	1
TGFBR2	0.000200793	0.294598	0.272	0.178	1
JAK1	0.000516486	0.352882	0.688	0.646	1
TM4SF1	0.000664616	0.251337	0.179	0.101	1
TFPI	0.000748973	0.385208	0.312	0.217	1
NFKBIA	0.00125084	0.267907	0.589	0.512	1
TGM2	0.00134728	0.569997	0.536	0.479	1
DHFR	0.00219866	0.310398	0.571	0.514	1
MCM4	0.00234295	0.27129	0.357	0.294	1
IGFBP4	0.0230312	0.30621	0.259	0.347	1
ENG	0.0667526	0.411523	0.085	0.133	1
COL4A2	0.101827	0.265025	0.92	0.951	1
LDB2	0.244974	0.327507	0.098	0.133	1
COL4A1	0.568953	0.252828	0.799	0.804	1
EGFL7	0.751306	0.492848	0.192	0.209	1
ID1	0.883858	0.566541	0.433	0.485	1
PRCP	0.948163	0.455267	0.652	0.656	1
