# Supplementary material for: A single cell transcriptional roadmap of human pacemaker cell differentiation
Source: eLife. 2022 Oct 11;11:e76781. doi: 10.7554/eLife.76781 (PMC9553210; doi:10.7554/eLife.76781)
Supplement: Supplementary file 6. — Related to Figure 1, Figure 2, Figure 5, Figure 6. [file elife-76781-supp6.xlsx]

## Sheet: Primers
Target	Forward 5'-3	Reverse 5'-3
RPLP0	ATCCAGCAGGTGTTCGACAAT	GCCAGGACTCGTTTGTACCC
GUSB	CCTGCGTCCCACCTAGAATC	ATACGGAGCCCCCTTGTCT
TNNT2	TTCGACCTGCAGGAGAAGTT	GCGGGTCTTGGAGACTTTCT
ACTN2	AACCACTTTGACAGGAGGAAGAA	CTTGCCCGTTGGGATCTACC
NKX2-5	CCAAGGACCCTAGAGCCGAA	ACACGTCTCACTCAGCATTTGT
SHOX2	CCATAAAGGTGTTCTCATAGGGGC	AACCTGAAAGGACAAGGGCG
TBX3	TGTACATTCACCCGGACAGC	TTGGGAAGGCCAAAGTAAATCCA
TBX5	ACATGGAGCTGCACAGAATG	TGCTGAAAGGACTGTGGTTG
TBX18	TTGCTAAAGGCTTCCGAGAC	AGGTGGAGGAACTTGCATTG
ISL1	AGGCTAACCCAGTGGAAGTA	TCTGGAAGTTGAGAGGACATTGA
MYL2	TACGTTCGGGAAATGCTGAC	TTCTCCGTGGGTGATGATG
HOPX	GGGCTGTTACAGAAGAAGACTGG	GCTGCTTAAACCATTTCTGGGTC
MYH7	AACACCAACCTGTCCAAGTTCC	TGAGCAGATCAAGATGTGGCAA
NPPA	CGATCTGCCCTCCTAAAAAGC	TTGTCCTCCCTGGCTGTTATC
ADM	TTGGCAGATCACTCTCTTAGCA	GACATCCGCAGTTCCCTCT
HCN4	GATCCTCAGCCTCTTACGCC	AGGAGCATCATGCCGATGAG
HCN1	ACGGTGTTGCTGGTGTCAT	GTCCTTTGGTCAGCAGGCAA
CACNA1D	CTCGCCCGTTTGCTATGATTC	GGAAGATGGGAGACGACGG
CACNA1G	CCAGGACGCTCCCCTTTG	CTGTGCCTGGGTACTTGACT
KCNJ3	TGTCGTCATCCTAGAAGGCA	AAAAACGATGACCCCAAAGA
SCN5A	CAGGCGAGTGTATTGTCAAGC	GATGATGTCCGAGAGCACAGT
NTM	CATCATGCTATTTGGTCCAGGC	GGGAAGTGGCACTCACATCA
FLRT3	AGACGGGGGAGGGCTATTAC	GGTCAGCAGTGTTGAGGTCTT
KCNIP2	ACGTGGAGAGCTTCTTCCAGA	GTCCGCCTGGACTAGGGTTA
VSNL1	GGAAGCAGAATAGCAAACTGGC	GAGGCGTCTCCATAAGGAAAGA
CPNE5	GGCAGAGTTCGACGCCAT	CACGTAGTCCCGGAAGGGTA
WT1	CGGTCGGCATCTGAGACCAGT	TTGAGCTGGTCTGAACGAGAAAACC
